# Supplementary material for: Comparative Proteomic Analysis of Rhipicephalus sanguineus sensu lato (Acari: Ixodidae) Tropical and Temperate Lineages: Uncovering Differences During Ehrlichia canis Infection
Source: Front Cell Infect Microbiol. 2021 Jan 29;10:611113. doi: 10.3389/fcimb.2020.611113 (PMC7879575; doi:10.3389/fcimb.2020.611113)
Supplement: Supplementary Table 3 — Analysis of the sialome of R. sanguineus tropical vs. temperate lineage in E. canis infected condition. [file Table_3.xlsx]

## Sheet: All SG proteins
									RsS	RsJ
Row	Index	Peak Name	m/z	Ret. Time	Group	Use	t-value	p-value	Mean 1	Mean 2	Median 1	Median 2	Sigma 1	Sigma 2	Delta	Fold Change	Log (Fold Change)	Fold Change (RsJ/RsS)	Log (Fold Change)
1	139	tr|J9JHF7|J9JHF7_CANLF	N/A	N/A	Uncharacterized protein OS=Canis lupus familiaris GN=LOC100855540 PE=3 SV=1	TRUE	391.63	1.8707e-14	3.98067e+07	2.02178e+06	3.97895e+07	2.036e+06	189117	38330.7	3.77849e+07	19.6889	1.29422	0.0507901	-4.29931
2	130	tr|A0A224YQW1|A0A224YQW1_9ACAR	N/A	N/A	Serine protease inhibitor OS=Rhipicephalus zambeziensis PE=3 SV=1	TRUE	153.254	5.2065e-12	650312	85246	649239	86029.1	6690.13	3101.92	565066	7.62865	0.882448	0.131085	-2.93143
3	366	tr|A0A131XNT8|A0A131XNT8_9ACAR	N/A	N/A	Putative glutathione s-transferase OS=Hyalomma excavatum PE=2 SV=1	TRUE	152.321	5.4007e-12	693131	139129	693256	138688	4255.98	5899.13	554002	4.98193	0.697398	0.200725	-2.31671
4	250	tr|C9W1B4|C9W1B4_RHISA	N/A	N/A	Hypothetical secreted protein (Fragment) OS=Rhipicephalus sanguineus PE=2 SV=1	TRUE	127.917	1.5393e-11	581599	119066	581953	119159	3354.47	6406.72	462533	4.88467	0.688835	0.204722	-2.28826
5	59	tr|A0A131YM09|A0A131YM09_RHIAP	N/A	N/A	Alpha-N-acetylgalactosaminidase OS=Rhipicephalus appendiculatus PE=3 SV=1	TRUE	-127.495	1.5701e-11	1.46917e+06	4.63281e+06	1.46403e+06	4.63044e+06	21829.3	44568.9	-3.16364e+06	0.317122	-0.498773	3.15336	1.65689
6	19	tr|A0A224Z2K0|A0A224Z2K0_9ACAR	N/A	N/A	Tropomyosin OS=Rhipicephalus zambeziensis PE=4 SV=1	TRUE	118.561	2.4275e-11	4.26721e+06	1.12531e+06	4.26036e+06	1.12495e+06	48660.7	21004.3	3.1419e+06	3.79203	0.578871	0.263711	-1.92297
7	323	tr|A0A224YGN2|A0A224YGN2_9ACAR	N/A	N/A	Ixoderin OS=Rhipicephalus zambeziensis PE=4 SV=1	TRUE	-101.408	6.1975e-11	59905.7	547004	60300.4	545246	3085.56	9097.73	-487098	0.109516	-0.960522	9.13108	3.19078
8	49	sp|P60524|HBB_CANLF	N/A	N/A	Hemoglobin subunit beta OS=Canis lupus familiaris GN=HBB PE=1 SV=1	TRUE	89.2241	1.3352e-10	4.61667e+07	1.3964e+06	4.62745e+07	1.3927e+06	1.0032e+06	26507.8	4.47703e+07	33.0612	1.51932	0.0302469	-5.04707
9	594	tr|V5H340|V5H340_IXORI	N/A	N/A	Putative vitellogenin-1 OS=Ixodes ricinus PE=2 SV=1	TRUE	81.2451	2.3414e-10	114130	23251.5	114192	23362.9	1968.73	1062.51	90878.5	4.9085	0.690949	0.203728	-2.29528
10	125	tr|A0A023GME3|A0A023GME3_9ACAR	N/A	N/A	Putative vitellogenin-1 (Fragment) OS=Amblyomma triste PE=2 SV=1	TRUE	76.3454	3.3996e-10	1.89261e+06	299088	1.90783e+06	300276	39215.3	14311.6	1.59353e+06	6.32795	0.801263	0.158029	-2.66174
11	32	tr|J9P430|J9P430_CANLF	N/A	N/A	Transferrin OS=Canis lupus familiaris GN=TF PE=3 SV=1	TRUE	76.1798	3.4442e-10	1.4548e+06	120679	1.44913e+06	124709	27076.7	22218.1	1.33412e+06	12.0552	1.08117	0.082952	-3.59158
12	683	tr|A0A131YEJ6|A0A131YEJ6_RHIAP	N/A	N/A	Uncharacterized protein OS=Rhipicephalus appendiculatus PE=4 SV=1	TRUE	75.9511	3.5068e-10	339309	41965.9	338382	41491.1	7737.9	1196.48	297343	8.08535	0.907699	0.12368	-3.01531
13	838	tr|L7LR20|L7LR20_9ACAR	N/A	N/A	Putative salivary lipocalin OS=Rhipicephalus pulchellus PE=2 SV=1	TRUE	74.8309	3.8335e-10	103555	14217.9	103503	14204.5	2191	949.054	89337.4	7.28344	0.862336	0.137298	-2.86462
14	136	tr|E2RCC8|E2RCC8_CANLF	N/A	N/A	Immunoglobulin heavy constant mu OS=Canis lupus familiaris GN=IGHM PE=4 SV=2	TRUE	69.383	6.0307e-10	831723	27762.6	840732	27646.5	22535.9	5403.18	803961	29.9584	1.47652	0.0333796	-4.90489
15	458	tr|A0A1E1XNG1|A0A1E1XNG1_9ACAR	N/A	N/A	Putative diacetyl reductase/l-xylulose reductase (Fragment) OS=Amblyomma sculptum PE=2 SV=1	TRUE	69.1174	6.1709e-10	506867	97075.2	510443	98261.2	10052	6290.06	409792	5.22138	0.717785	0.19152	-2.38443
16	126	tr|A0A224Z4V4|A0A224Z4V4_9ACAR	N/A	N/A	Calponin OS=Rhipicephalus zambeziensis PE=3 SV=1	TRUE	66.1055	8.0596e-10	3.63816e+06	1.62453e+06	3.63605e+06	1.63136e+06	34567.7	50164.9	2.01363e+06	2.23951	0.350154	0.446526	-1.16319
17	483	tr|L7MBE1|L7MBE1_9ACAR	N/A	N/A	Putative ixoderin OS=Rhipicephalus pulchellus PE=2 SV=1	TRUE	-64.0407	9.7477e-10	99758.6	377441	99208.9	379512	2782.1	8213.67	-277682	0.264303	-0.577898	3.78354	1.91974
18	225	tr|L7M0V0|L7M0V0_9ACAR	N/A	N/A	Putative heat shock-related protein OS=Rhipicephalus pulchellus PE=2 SV=1	TRUE	-63.8173	9.9539e-10	794241	1.51942e+06	791133	1.5208e+06	8462.2	21092.5	-725178	0.522727	-0.281725	1.91305	0.935871
19	560	tr|A0A131YHN4|A0A131YHN4_RHIAP	N/A	N/A	Pancreatic trypsin inhibitor OS=Rhipicephalus appendiculatus PE=4 SV=1	TRUE	-63.4293	1.0324e-09	62164.2	352599	61542.8	352693	3808.91	8328.04	-290434	0.176303	-0.75374	5.67206	2.50387
20	344	tr|A0A224Y1R0|A0A224Y1R0_9ACAR	N/A	N/A	Basic tail secreted protein OS=Rhipicephalus zambeziensis PE=4 SV=1	TRUE	-62.1069	1.1714e-09	321042	935103	323789	934685	9217.97	17494.4	-614060	0.343323	-0.464297	2.91271	1.54236
21	342	tr|F1PTX4|F1PTX4_CANLF	N/A	N/A	Keratin, type II cytoskeletal 2 epidermal OS=Canis lupus familiaris GN=KRT2 PE=3 SV=2	TRUE	-60.7547	1.3365e-09	204515	418985	205751	418338	3962.41	5843.44	-214470	0.48812	-0.311474	2.04868	1.03469
22	507	tr|L7LYB6|L7LYB6_9ACAR	N/A	N/A	Uncharacterized protein OS=Rhipicephalus pulchellus PE=2 SV=1	TRUE	58.9098	1.6077e-09	84310.4	6365.12	84564.1	6158.79	2329.29	1255.83	77945.3	13.2457	1.12207	0.0754962	-3.72745
23	767	tr|A0A131XQ18|A0A131XQ18_9ACAR	N/A	N/A	Putative fatty acid-binding protein fabp (Fragment) OS=Hyalomma excavatum PE=2 SV=1	TRUE	58.9063	1.6083e-09	335306	66750.7	337239	66087.3	7719.83	4852.11	268555	5.02325	0.700985	0.199074	-2.32862
24	267	tr|A0A224YGV9|A0A224YGV9_9ACAR	N/A	N/A	Serine protease inhibitor OS=Rhipicephalus zambeziensis PE=3 SV=1	TRUE	58.7981	1.6261e-09	295922	103587	295363	102480	2796.2	5914.57	192336	2.85676	0.455873	0.350047	-1.51438
25	396	tr|C9W1Q4|C9W1Q4_RHISA	N/A	N/A	Putative thyropin OS=Rhipicephalus sanguineus PE=2 SV=1	TRUE	-57.3202	1.894e-09	114927	297285	114402	297671	3867.03	5052.82	-182358	0.386589	-0.41275	2.58672	1.37113
26	800	tr|L7LTJ2|L7LTJ2_9ACAR	N/A	N/A	Putative bitil peptide OS=Rhipicephalus pulchellus PE=2 SV=1	TRUE	-56.8728	1.985e-09	4060.95	61474.7	3980.74	61186.2	917.195	1798.67	-57413.8	0.0660589	-1.18007	15.138	3.9201
27	194	tr|L7M5D0|L7M5D0_9ACAR	N/A	N/A	Putative synaptic vesicle membrane protein vat-1 OS=Rhipicephalus pulchellus PE=2 SV=1	TRUE	56.8692	1.9858e-09	172138	6154.94	170763	6942.46	5358.86	2314.64	165983	27.9675	1.44665	0.0357558	-4.80568
28	202	tr|A0A1E1XJX4|A0A1E1XJX4_9ACAR	N/A	N/A	Putative secreted protein (Fragment) OS=Amblyomma sculptum PE=2 SV=1	TRUE	55.556	2.284e-09	1.13626e+06	359070	1.13199e+06	359895	22916.4	16050.9	777187	3.16444	0.500297	0.316011	-1.66195
29	336	tr|L7M673|L7M673_9ACAR	N/A	N/A	Putative trna selenocysteine 1-associated protein 1 OS=Rhipicephalus pulchellus PE=2 SV=1	TRUE	54.8532	2.465e-09	432688	157189	436306	157156	9860.02	1918.64	275499	2.75267	0.439753	0.363284	-1.46083
30	783	tr|A0A224YL08|A0A224YL08_9ACAR	N/A	N/A	TIL domain containing protein OS=Rhipicephalus zambeziensis PE=4 SV=1	TRUE	-53.4896	2.8662e-09	43245.9	228111	43638.3	227258	3379.87	6029.48	-184865	0.189583	-0.722201	5.27473	2.3991
31	4	tr|L7M2A4|L7M2A4_9ACAR	N/A	N/A	Putative alpha actinin OS=Rhipicephalus pulchellus PE=2 SV=1	TRUE	52.8857	3.0678e-09	2.66824e+06	1.51047e+06	2.67273e+06	1.49703e+06	21967	37874.3	1.15777e+06	1.76649	0.247112	0.566093	-0.820888
32	11	tr|A0A034WXH7|A0A034WXH7_RHIMP	N/A	N/A	Vitellogenin 4 (Fragment) OS=Rhipicephalus microplus PE=4 SV=1	TRUE	51.7002	3.5139e-09	7.94605e+06	1.2729e+06	8.02027e+06	1.28303e+06	251666	57487.5	6.67316e+06	6.2425	0.795359	0.160192	-2.64212
33	383	tr|A0A0A7DS56|A0A0A7DS56_RHIMP	N/A	N/A	Pyruvate kinase OS=Rhipicephalus microplus PE=2 SV=1	TRUE	50.9312	3.8439e-09	394412	218482	395578	217930	3228.51	6107.76	175930	1.80524	0.256535	0.553943	-0.852189
34	116	tr|G1K2D9|G1K2D9_CANLF	N/A	N/A	Haptoglobin OS=Canis lupus familiaris GN=LOC479668 PE=3 SV=1	TRUE	50.4725	4.0578e-09	1.66788e+06	94897.2	1.65778e+06	92635.6	49317.8	38116.1	1.57299e+06	17.5757	1.24491	0.0568968	-4.13551
35	748	tr|A0A131XF49|A0A131XF49_9ACAR	N/A	N/A	Putative secreted salivary gland peptide OS=Hyalomma excavatum PE=2 SV=1	TRUE	50.2817	4.1509e-09	173941	6871.72	174329	7179.77	5465.53	3779.97	167069	25.3125	1.40334	0.0395061	-4.66178
36	14	tr|A0A224YPA7|A0A224YPA7_9ACAR	N/A	N/A	Heat shock 70kDa protein 1/8 OS=Rhipicephalus zambeziensis PE=3 SV=1	TRUE	50.0774	4.2533e-09	1.88269e+06	1.10644e+06	1.88866e+06	1.10729e+06	29038.1	10858.2	776245	1.70157	0.230849	0.587693	-0.766865
37	163	tr|A0A224YUP2|A0A224YUP2_9ACAR	N/A	N/A	Collagen type IV alpha OS=Rhipicephalus zambeziensis PE=3 SV=1	TRUE	-49.8756	4.3574e-09	301096	703892	303856	707122	10176	12543.4	-402796	0.427758	-0.368801	2.33777	1.22513
38	101	tr|A0A224YB78|A0A224YB78_9ACAR	N/A	N/A	Lipocalin OS=Rhipicephalus zambeziensis PE=4 SV=1	TRUE	49.5722	4.5195e-09	1.99431e+06	406611	1.99784e+06	410756	59318.1	24176.8	1.5877e+06	4.90471	0.690613	0.203886	-2.29417
39	364	tr|A0A034WXN6|A0A034WXN6_RHIMP	N/A	N/A	Hemelipoprotein HeLp 2 (Fragment) OS=Rhipicephalus microplus PE=4 SV=1	TRUE	48.7037	5.024e-09	965091	476122	965510	476671	17168.3	10413	488969	2.02698	0.30685	0.493344	-1.01933
40	666	tr|A0A131YXW9|A0A131YXW9_RHIAP	N/A	N/A	Beat protein like 1 OS=Rhipicephalus appendiculatus PE=4 SV=1	TRUE	45.6508	7.4017e-09	195568	65952.9	194306	66157.1	5033.04	2629.48	129615	2.96526	0.472063	0.337238	-1.56816
41	264	tr|A0A224YCQ3|A0A224YCQ3_9ACAR	N/A	N/A	Lipocalin (Fragment) OS=Rhipicephalus zambeziensis PE=4 SV=1	TRUE	-45.2993	7.7522e-09	1.8241e+06	4.88065e+06	1.82544e+06	4.84763e+06	86828.9	103306	-3.05655e+06	0.373741	-0.42743	2.67565	1.41989
42	51	tr|A0A224Z095|A0A224Z095_9ACAR	N/A	N/A	Heat shock 70kDa protein 5 OS=Rhipicephalus zambeziensis PE=3 SV=1	TRUE	45.0314	8.0324e-09	803514	300778	801701	305130	13669.7	17654.7	502736	2.67145	0.426747	0.374328	-1.41762
43	393	tr|A0A224Z2W7|A0A224Z2W7_9ACAR	N/A	N/A	Large subunit ribosomal protein LP1 OS=Rhipicephalus zambeziensis PE=3 SV=1	TRUE	44.7734	8.3134e-09	142787	51875.8	141679	52066.1	2378.79	3291.32	90911.7	2.75249	0.439725	0.363308	-1.46074
44	874	tr|A0A224YML8|A0A224YML8_9ACAR	N/A	N/A	Lipocalin OS=Rhipicephalus zambeziensis PE=4 SV=1	TRUE	44.2094	8.9685e-09	83656.1	4663.84	83463.6	4341.35	3179.21	1631.83	78992.3	17.9372	1.25375	0.0557502	-4.16488
45	494	tr|A0A023FXL4|A0A023FXL4_9ACAR	N/A	N/A	Protein disulfide-isomerase OS=Amblyomma parvum PE=2 SV=1	TRUE	43.6825	9.6356e-09	215513	20313.7	214573	21271.6	7505.64	4851.67	195199	10.6093	1.02568	0.0942573	-3.40725
46	362	tr|A0A131YQ21|A0A131YQ21_RHIAP	N/A	N/A	Glutathione S-transferase OS=Rhipicephalus appendiculatus PE=3 SV=1	TRUE	43.1648	1.0348e-08	103003	41412	102665	41947	2201.37	1815.98	61590.5	2.48726	0.395721	0.402049	-1.31456
47	730	tr|B7P5Q1|B7P5Q1_IXOSC	N/A	N/A	Cuticle protein, putative OS=Ixodes scapularis GN=8024995 PE=4 SV=1	TRUE	-43.1632	1.035e-08	3406.27	277942	2563.76	278471	2735.04	12423.3	-274536	0.0122553	-1.91168	81.5973	6.35045
48	856	tr|L7M132|L7M132_9ACAR	N/A	N/A	Uncharacterized protein OS=Rhipicephalus pulchellus PE=2 SV=1	TRUE	-42.6401	1.1134e-08	15105.4	47881.3	15115.1	47532.2	720.114	1358.24	-32775.9	0.315476	-0.501033	3.16981	1.6644
49	247	tr|A0A131Z9A0|A0A131Z9A0_RHIAP	N/A	N/A	BIGH3 (Fragment) OS=Rhipicephalus appendiculatus PE=4 SV=1	TRUE	-41.1224	1.3829e-08	38455.5	222646	40150.1	225806	5761.62	6859.48	-184191	0.17272	-0.762657	5.78971	2.53349
50	121	tr|A0A0C9SCJ0|A0A0C9SCJ0_AMBAM	N/A	N/A	Putative 60 kDa chaperonin (Fragment) OS=Amblyomma americanum PE=2 SV=1	TRUE	-40.5613	1.5013e-08	372004	797077	371966	800656	3672.19	20635.3	-425072	0.466711	-0.330952	2.14265	1.0994
51	459	tr|E1CAX9|E1CAX9_HAELO	N/A	N/A	Vitellogenin-1 OS=Haemaphysalis longicornis GN=HlVg-1 PE=2 SV=1	TRUE	40.3619	1.5463e-08	2.76194e+06	561246	2.75684e+06	514401	38831.7	101900	2.20069e+06	4.92109	0.692061	0.203207	-2.29898
52	561	tr|V9VL04|V9VL04_RHIMP	N/A	N/A	Serine protease inhibitor 6 RmS6 OS=Rhipicephalus microplus GN=RmS-6 PE=2 SV=1	TRUE	40.2453	1.5733e-08	785693	170992	794830	168945	29573.8	7652.03	614700	4.5949	0.662276	0.217633	-2.20003
53	773	tr|A0A1E1X172|A0A1E1X172_9ACAR	N/A	N/A	Putative dosage compensation complex subunit mle OS=Amblyomma aureolatum PE=2 SV=1	TRUE	39.8698	1.664e-08	408656	126061	409515	127085	9876.08	10169.5	282595	3.24174	0.510778	0.308477	-1.69677
54	355	tr|A0A131X8J9|A0A131X8J9_9ACAR	N/A	N/A	Putative glutathione s-transferase OS=Hyalomma excavatum PE=2 SV=1	TRUE	38.7454	1.9744e-08	251627	38578.6	250313	39794.4	8337.97	7170.78	213049	6.52245	0.814411	0.153317	-2.70541
55	523	tr|C9W1T1|C9W1T1_RHISA	N/A	N/A	Cement-like protein (Fragment) OS=Rhipicephalus sanguineus PE=2 SV=1	TRUE	-38.1872	2.1534e-08	549640	3.51446e+06	550366	3.52816e+06	26808.3	152947	-2.96482e+06	0.156394	-0.805781	6.39412	2.67675
56	814	tr|A0A224YL44|A0A224YL44_9ACAR	N/A	N/A	TIL domain containing protein OS=Rhipicephalus zambeziensis PE=4 SV=1	TRUE	-38.1023	2.1822e-08	6830.75	200240	7720.15	199708	4171.14	9255.65	-193410	0.0341127	-1.46708	29.3146	4.87355
57	878	tr|A0A1E1XGR0|A0A1E1XGR0_9ACAR	N/A	N/A	Putative synaptic vesicle protein synapsin (Fragment) OS=Amblyomma aureolatum PE=2 SV=1	TRUE	-37.9964	2.2188e-08	50293.6	107569	49971.2	107968	1021.15	2836.59	-57275.7	0.467546	-0.330176	2.13883	1.09682
58	756	tr|G3MLX5|G3MLX5_9ACAR	N/A	N/A	Uncharacterized protein OS=Amblyomma maculatum PE=2 SV=1	TRUE	-37.6405	2.3472e-08	113842	450558	113878	448980	5041.88	17166	-336716	0.25267	-0.597447	3.95774	1.98468
59	681	tr|A0A224YVZ3|A0A224YVZ3_9ACAR	N/A	N/A	Collagen type IV alpha OS=Rhipicephalus zambeziensis PE=3 SV=1	TRUE	-37.3611	2.4541e-08	36567.4	88043.2	36358.5	88981.3	1338.82	2408.48	-51475.8	0.415335	-0.381602	2.4077	1.26765
60	75	tr|A0A224Z295|A0A224Z295_9ACAR	N/A	N/A	Protein disulfide-isomerase OS=Rhipicephalus zambeziensis PE=3 SV=1	TRUE	36.6113	2.7703e-08	594543	264725	595814	260391	14513	10676.8	329817	2.24589	0.351388	0.445259	-1.16728
61	479	tr|A0A224Y6Z2|A0A224Y6Z2_9ACAR	N/A	N/A	7DB family member OS=Rhipicephalus zambeziensis PE=4 SV=1	TRUE	-35.9632	3.0823e-08	12868.2	149112	13060.8	149962	1174.65	7485.24	-136244	0.0862987	-1.064	11.5877	3.53452
62	620	tr|A0A224YJB7|A0A224YJB7_9ACAR	N/A	N/A	Alpha-2-macroglobiln splicing variant 1 OS=Rhipicephalus zambeziensis PE=4 SV=1	TRUE	35.9498	3.0892e-08	244644	109217	246479	109625	6997.96	2791.55	135427	2.23997	0.350243	0.446434	-1.16348
63	847	tr|A0A023FXY9|A0A023FXY9_9ACAR	N/A	N/A	Putative hydroxyacyl-coa dehydrogenase/enoyl-coa hydratase OS=Amblyomma parvum PE=2 SV=1	TRUE	35.7854	3.175e-08	129899	65963.2	130268	65883.6	3316.71	1329.63	63936	1.96927	0.294305	0.507803	-0.977659
64	197	tr|A0A131YYA2|A0A131YYA2_RHIAP	N/A	N/A	Isocitrate dehydrogenase [NADP] OS=Rhipicephalus appendiculatus PE=3 SV=1	TRUE	35.6292	3.2591e-08	77258.2	16708.2	77928.2	16959	1829.39	2864.59	60550	4.62396	0.665014	0.216265	-2.20913
65	703	tr|A0A224Z454|A0A224Z454_9ACAR	N/A	N/A	Nidogen OS=Rhipicephalus zambeziensis PE=4 SV=1	TRUE	-35.3131	3.4373e-08	2920.7	45335.1	2595.75	45394.8	1297.69	2021.52	-42414.4	0.0644248	-1.19095	15.522	3.95624
66	86	tr|A0A131XGU0|A0A131XGU0_9ACAR	N/A	N/A	Putative translation initiation factor 2c eif-2c (Fragment) OS=Hyalomma excavatum PE=2 SV=1	TRUE	-35.2814	3.4558e-08	216204	537780	220569	536723	15430.8	9705.33	-321576	0.402031	-0.39574	2.48737	1.31462
67	785	tr|A0A023G883|A0A023G883_9ACAR	N/A	N/A	Putative glutathione s-transferase ixodes scapularis glutathione s-transferase (Fragment) OS=Amblyomma triste PE=2 SV=1	TRUE	34.1186	4.2218e-08	601126	33772.7	598466	38143	27027.2	19380.7	567354	17.7992	1.2504	0.0561824	-4.15374
68	752	tr|A0A131Z560|A0A131Z560_RHIAP	N/A	N/A	Enolase OS=Rhipicephalus appendiculatus PE=3 SV=1	TRUE	33.6835	4.5581e-08	241605	96862.7	241812	97163.8	7997.26	3147.16	144742	2.4943	0.396949	0.400914	-1.31863
69	823	tr|A0A131YNG2|A0A131YNG2_RHIAP	N/A	N/A	Pancreatic trypsin inhibitor OS=Rhipicephalus appendiculatus PE=4 SV=1	TRUE	-33.6773	4.5631e-08	16457.7	89256.7	16375.3	90395	1289.81	4126.44	-72799	0.184386	-0.734272	5.42341	2.4392
70	761	tr|J9PAW5|J9PAW5_CANLF	N/A	N/A	Uncharacterized protein OS=Canis lupus familiaris PE=4 SV=1	TRUE	33.4302	4.7683e-08	231178	5561.04	231944	3362.88	12644.5	4722.99	225617	41.571	1.61879	0.0240552	-5.37751
71	791	tr|L7MIR1|L7MIR1_9ACAR	N/A	N/A	Putative bitil peptide (Fragment) OS=Rhipicephalus pulchellus PE=2 SV=1	TRUE	-33.323	4.8607e-08	4489.79	48784.8	4179.94	49237.5	652.343	2577.25	-44295	0.0920326	-1.03606	10.8657	3.44171
72	749	tr|L7M6Q8|L7M6Q8_9ACAR	N/A	N/A	Peptidyl-prolyl cis-trans isomerase OS=Rhipicephalus pulchellus PE=2 SV=1	TRUE	33.0914	5.0673e-08	194855	40180.7	195919	40325.4	8463.09	3970.66	154674	4.84946	0.685693	0.206209	-2.27782
73	735	tr|J9P0I1|J9P0I1_CANLF	N/A	N/A	Keratin, type I cytoskeletal 9 OS=Canis lupus familiaris GN=KRT9 PE=3 SV=1	TRUE	-33.0345	5.1197e-08	519909	1.10801e+06	521538	1.11506e+06	11419.9	33724.1	-588100	0.469228	-0.328616	2.13116	1.09164
74	27	tr|A0A224YT49|A0A224YT49_9ACAR	N/A	N/A	Aldehyde dehydrogenase OS=Rhipicephalus zambeziensis PE=3 SV=1	TRUE	32.8095	5.333e-08	641548	257119	646528	253102	19985.7	12236.2	384429	2.49514	0.397095	0.400779	-1.31912
75	9	tr|A0A224YUL1|A0A224YUL1_9ACAR	N/A	N/A	Lipoprotein amino terminal region OS=Rhipicephalus zambeziensis PE=4 SV=1	TRUE	32.5738	5.5675e-08	4.02273e+06	2.09566e+06	4.00302e+06	2.09773e+06	100082	63112.7	1.92707e+06	1.91955	0.2832	0.520954	-0.940772
76	258	tr|L7M046|L7M046_9ACAR	N/A	N/A	Putative cuticular protein OS=Rhipicephalus pulchellus PE=2 SV=1	TRUE	32.2819	5.875e-08	1.43091e+06	817796	1.42981e+06	806576	10810.3	36414.5	613116	1.74972	0.242968	0.57152	-0.807123
77	182	tr|C9W1E7|C9W1E7_RHISA	N/A	N/A	Cement-like antigen OS=Rhipicephalus sanguineus PE=2 SV=1	TRUE	-31.9731	6.2219e-08	55176.1	5.68749e+06	55208.7	5.5281e+06	12697.6	352087	-5.63232e+06	0.0097013	-2.01317	103.079	6.68761
78	643	tr|A0A131Z306|A0A131Z306_RHIAP	N/A	N/A	Antigen 5 family member OS=Rhipicephalus appendiculatus PE=3 SV=1	TRUE	31.7708	6.4622e-08	395218	156175	401877	158590	13963.7	5608.74	239043	2.53061	0.403226	0.395161	-1.33949
79	105	tr|A0A131XAX9|A0A131XAX9_9ACAR	N/A	N/A	Putative nadh-ubiquinone oxidoreductase ndufs1/75 kDa subunit OS=Hyalomma excavatum PE=2 SV=1	TRUE	-31.7549	6.4816e-08	351636	641769	351911	646921	2461.31	18106.8	-290133	0.547917	-0.261285	1.82509	0.867971
80	177	tr|L7M679|L7M679_9ACAR	N/A	N/A	Putative f0f1-type atp synthase gamma subunit OS=Rhipicephalus pulchellus PE=2 SV=1	TRUE	-31.3023	7.0613e-08	6437.3	84269.8	7789.3	84396.2	3605.85	3424.63	-77832.5	0.0763891	-1.11697	13.0909	3.71049
81	417	tr|C9W1E6|C9W1E6_RHISA	N/A	N/A	Putative cement protein OS=Rhipicephalus sanguineus PE=2 SV=1	TRUE	-31.0033	7.4775e-08	140229	907814	141156	898028	2881.75	49432.4	-767585	0.154469	-0.811159	6.4738	2.69461
82	367	tr|A0A224YW31|A0A224YW31_9ACAR	N/A	N/A	Erythrocyte membrane protein 1 (Fragment) OS=Rhipicephalus zambeziensis PE=4 SV=1	TRUE	-30.8101	7.7618e-08	164915	325082	164505	326369	5414.48	8875.92	-160167	0.507303	-0.294732	1.97121	0.97908
83	827	tr|A0A224YR96|A0A224YR96_9ACAR	N/A	N/A	Tick serine protease OS=Rhipicephalus zambeziensis PE=3 SV=1	TRUE	30.7507	7.8517e-08	113836	8807.59	115214	8553.88	6150.97	2971.14	105029	12.9248	1.11142	0.0773708	-3.69207
84	435	tr|L7M5B2|L7M5B2_9ACAR	N/A	N/A	Putative nucleoside diphosphate-sugar hydrolase of the mutt nudix family OS=Rhipicephalus pulchellus PE=2 SV=1	TRUE	30.4591	8.3109e-08	126716	37007	127671	37222.5	4048.5	4278.7	89709.2	3.42412	0.534549	0.292046	-1.77573
85	562	tr|A0A224YUF9|A0A224YUF9_9ACAR	N/A	N/A	NADH dehydrogenase [ubiquinone] 1 alpha subcomplex subunit 8 OS=Rhipicephalus zambeziensis PE=3 SV=1	TRUE	-30.4358	8.349e-08	36854	162371	36558.1	162487	4385.05	6985.78	-125517	0.226974	-0.644025	4.4058	2.1394
86	79	tr|L7M6S1|L7M6S1_9ACAR	N/A	N/A	Putative heat shock-related protein OS=Rhipicephalus pulchellus PE=2 SV=1	TRUE	-30.4341	8.3518e-08	472898	777493	471737	774427	4972.8	19389.2	-304595	0.608234	-0.215929	1.6441	0.717301
87	495	tr|A0A131XLJ3|A0A131XLJ3_9ACAR	N/A	N/A	Putative transglutaminase/protease-like protein OS=Hyalomma excavatum PE=2 SV=1	TRUE	-30.4164	8.3808e-08	6481.65	222078	1550.04	224427	10284.3	9757.06	-215596	0.0291864	-1.53482	34.2625	5.09856
88	542	tr|G3MN41|G3MN41_9ACAR	N/A	N/A	Uncharacterized protein OS=Amblyomma maculatum PE=2 SV=1	TRUE	-30.067	8.9789e-08	198797	347202	199048	346404	4105.88	8977.24	-148405	0.572568	-0.242173	1.74652	0.804481
89	889	tr|A0A023FNM2|A0A023FNM2_9ACAR	N/A	N/A	Putative alpha-2-macroglobulin-like protein OS=Amblyomma cajennense PE=2 SV=1	TRUE	29.1182	1.0871e-07	130100	55464.6	129252	54927.9	4246.31	2872	74635	2.34563	0.37026	0.426324	-1.22998
90	379	tr|L7M6Q1|L7M6Q1_9ACAR	N/A	N/A	Putative bisphosphate 3'-nucleotidase bpnt1/inositol polyphosphate 1-phosphatase OS=Rhipicephalus pulchellus PE=2 SV=1	TRUE	28.7447	1.1741e-07	113029	37680.4	113632	36705.3	2315.52	4703.52	75348.3	2.99967	0.477073	0.33337	-1.5848
91	55	tr|A0A224Z9I0|A0A224Z9I0_9ACAR	N/A	N/A	Succinate dehydrogenase [ubiquinone] flavoprotein subunit, mitochondrial OS=Rhipicephalus zambeziensis PE=3 SV=1	TRUE	-28.7385	1.1756e-07	449937	952013	453033	944473	19270.2	29146.7	-502076	0.472617	-0.325491	2.11588	1.08126
92	758	tr|C9W1N5|C9W1N5_RHISA	N/A	N/A	Secreted protein OS=Rhipicephalus sanguineus PE=2 SV=1	TRUE	-28.5126	1.2322e-07	13629.3	239632	14427.3	235133	5365.39	14917.3	-226003	0.0568758	-1.24507	17.5822	4.13604
93	53	tr|A0A224YEQ4|A0A224YEQ4_9ACAR	N/A	N/A	Glycine rich superfamily member (Fragment) OS=Rhipicephalus zambeziensis PE=4 SV=1	TRUE	-27.9909	1.3756e-07	1.13341e+07	1.86179e+07	1.13947e+07	1.86203e+07	264787	448050	-7.28384e+06	0.608772	-0.215545	1.64265	0.716025
94	96	tr|A0A224YTY7|A0A224YTY7_9ACAR	N/A	N/A	Glyceraldehyde-3-phosphate dehydrogenase OS=Rhipicephalus zambeziensis PE=3 SV=1	TRUE	27.9296	1.3937e-07	1.80438e+06	1.05495e+06	1.80325e+06	1.05438e+06	39054.3	36806.9	749427	1.71039	0.233095	0.584662	-0.774325
95	34	tr|F1PYU9|F1PYU9_CANLF	N/A	N/A	Keratin, type I cytoskeletal 10 OS=Canis lupus familiaris GN=KRT10 PE=3 SV=2	TRUE	-27.7718	1.4416e-07	1.59412e+06	3.51931e+06	1.59054e+06	3.53195e+06	75398.7	116349	-1.92519e+06	0.452964	-0.343936	2.20768	1.14253
96	512	tr|A0A224YDI8|A0A224YDI8_9ACAR	N/A	N/A	Glycine rich superfamily member OS=Rhipicephalus zambeziensis PE=4 SV=1	TRUE	27.7702	1.4421e-07	140546	37889.4	140189	38915.2	6645.75	3239.55	102657	3.70937	0.5693	0.269588	-1.89117
97	530	tr|L7LZK9|L7LZK9_9ACAR	N/A	N/A	Putative translocon-associated complex trap delta subunit OS=Rhipicephalus pulchellus PE=2 SV=1	TRUE	-27.4892	1.5322e-07	83632.3	145275	83138.2	145208	1657.85	4167.2	-61642.7	0.575683	-0.239817	1.73707	0.796654
98	84	tr|L7MBN6|L7MBN6_9ACAR	N/A	N/A	Putative 24 kDa family member OS=Rhipicephalus pulchellus PE=2 SV=1	TRUE	-27.4099	1.5588e-07	278399	594459	280094	599775	5675.74	22352.4	-316060	0.468324	-0.329454	2.13528	1.09442
99	413	tr|A0A131Z0J8|A0A131Z0J8_RHIAP	N/A	N/A	Pancreatic trypsin inhibitor OS=Rhipicephalus appendiculatus PE=4 SV=1	TRUE	-27.168	1.6433e-07	47686.2	150250	48605.9	149773	2284.3	7196.52	-102564	0.317378	-0.498423	3.15081	1.65572
100	122	tr|Q2V829|Q2V829_9ACAR	N/A	N/A	Troponin I protein OS=Rhipicephalus haemaphysaloides haemaphysaloides PE=2 SV=1	TRUE	26.8125	1.7775e-07	1.83286e+06	1.03574e+06	1.81158e+06	1.04594e+06	50802.2	30894.9	797120	1.76961	0.247878	0.565095	-0.823434
101	259	tr|Q19V51|Q19V51_DERVA	N/A	N/A	Hemelipoglycoprotein OS=Dermacentor variabilis PE=2 SV=1	TRUE	26.7667	1.7957e-07	2.63744e+06	746178	2.64043e+06	802825	42966.6	134624	1.89126e+06	3.53459	0.54834	0.282918	-1.82154
102	2	tr|A0A224YT82|A0A224YT82_9ACAR	N/A	N/A	Filamin OS=Rhipicephalus zambeziensis PE=4 SV=1	TRUE	26.7378	1.8073e-07	2.13932e+06	1.57376e+06	2.1387e+06	1.56378e+06	25314.6	33894.5	565564	1.35937	0.133338	0.735634	-0.44294
103	733	tr|A0A131YPX6|A0A131YPX6_RHIAP	N/A	N/A	Metastriate one of each protein family OS=Rhipicephalus appendiculatus PE=4 SV=1	TRUE	26.4984	1.9067e-07	1.29634e+06	761824	1.30252e+06	758703	32912.5	23330.6	534512	1.70162	0.230863	0.587675	-0.76691
104	481	tr|A0A023GL48|A0A023GL48_9ACAR	N/A	N/A	Putative aldehyde dehydrogenase OS=Amblyomma triste PE=2 SV=1	TRUE	26.46	1.9233e-07	353302	140570	348823	141285	12036.1	10662.3	212732	2.51336	0.400254	0.397874	-1.32962
105	760	tr|A0A034WX82|A0A034WX82_RHIMP	N/A	N/A	Chitinase_1 OS=Rhipicephalus microplus PE=4 SV=1	TRUE	26.4564	1.9248e-07	214462	85846.3	212211	88325.4	7295.71	6427.02	128616	2.49821	0.397629	0.400286	-1.3209
106	883	tr|B7S729|B7S729_RHISA	N/A	N/A	FREP A1 (Fragment) OS=Rhipicephalus sanguineus PE=2 SV=1	TRUE	26.4082	1.9458e-07	20331.9	3550.35	20425.6	3969.42	718.076	1048.64	16781.5	5.72672	0.757906	0.17462	-2.51771
107	23	tr|A0A131YYS9|A0A131YYS9_RHIAP	N/A	N/A	Serpin B OS=Rhipicephalus appendiculatus PE=3 SV=1	TRUE	26.2659	2.0094e-07	312693	96555.6	316940	96575.9	13962	8712.97	216137	3.23848	0.510341	0.308787	-1.69532
108	245	tr|A0A131Z2K3|A0A131Z2K3_RHIAP	N/A	N/A	Uncharacterized protein OS=Rhipicephalus appendiculatus PE=4 SV=1	TRUE	25.9931	2.1383e-07	481777	253849	482042	253694	6413.03	16323	227928	1.89789	0.278271	0.526901	-0.924397
109	314	tr|A0A131YIS0|A0A131YIS0_RHIAP	N/A	N/A	Chitin-binding protein OS=Rhipicephalus appendiculatus PE=4 SV=1	TRUE	25.7174	2.2785e-07	1.22214e+06	755461	1.22762e+06	757205	27213.4	24012.1	466676	1.61774	0.208908	0.618147	-0.693977
110	80	tr|A0A131YFY5|A0A131YFY5_RHIAP	N/A	N/A	Glutathione S-transferase OS=Rhipicephalus appendiculatus PE=4 SV=1	TRUE	25.7041	2.2855e-07	1.04866e+06	458641	1.05506e+06	459850	30711.5	34123.3	590020	2.28645	0.359162	0.437358	-1.19311
111	580	tr|E2RFV2|E2RFV2_CANLF	N/A	N/A	Tubulin beta chain OS=Canis lupus familiaris GN=TUBB4A PE=3 SV=2	TRUE	-25.6941	2.2908e-07	108108	247028	108252	248043	1920.93	10641.4	-138920	0.437634	-0.358889	2.28502	1.1922
112	784	tr|A0A224YCX8|A0A224YCX8_9ACAR	N/A	N/A	Pancreatic trypsin inhibitor OS=Rhipicephalus zambeziensis PE=4 SV=1	TRUE	25.645	2.317e-07	105902	11267.7	106729	12241	4970.56	5455.5	94634.1	9.39871	0.973068	0.106398	-3.23246
113	498	tr|C9W1K5|C9W1K5_RHISA	N/A	N/A	Putative cement protein (Fragment) OS=Rhipicephalus sanguineus PE=2 SV=1	TRUE	-25.5896	2.3471e-07	2187.31	1.12463e+06	1707.29	1.0946e+06	1294.73	87716.9	-1.12244e+06	0.00194492	-2.7111	514.16	9.00607
114	18	tr|G3MKF8|G3MKF8_9ACAR	N/A	N/A	Tubulin beta chain OS=Amblyomma maculatum PE=2 SV=1	TRUE	-25.3186	2.5006e-07	20373.5	203960	20099.3	202188	1986.23	14365.4	-183587	0.0998895	-1.00048	10.0111	3.32352
115	599	tr|A0A131YHK9|A0A131YHK9_RHIAP	N/A	N/A	Glutathione S-transferase OS=Rhipicephalus appendiculatus PE=4 SV=1	TRUE	25.2004	2.5712e-07	83191.2	20755.5	82511.7	21567.2	3717.95	3275.71	62435.8	4.00816	0.602945	0.249491	-2.00294
116	544	tr|A0A131Z3P7|A0A131Z3P7_RHIAP	N/A	N/A	Biliverdin reductase / flavin reductase OS=Rhipicephalus appendiculatus PE=4 SV=1	TRUE	25.1821	2.5824e-07	114398	23850.8	113801	24135.4	6150.1	3727.2	90546.8	4.79639	0.680915	0.20849	-2.26195
117	470	tr|G3MNV3|G3MNV3_9ACAR	N/A	N/A	Uncharacterized protein OS=Amblyomma maculatum PE=2 SV=1	TRUE	-25.0654	2.6547e-07	95632.3	286578	93410.7	284531	6189.6	13921.9	-190946	0.333704	-0.476638	2.99667	1.58336
118	61	tr|A0A224YUR7|A0A224YUR7_9ACAR	N/A	N/A	Lysosomal acid phosphatase OS=Rhipicephalus zambeziensis PE=3 SV=1	TRUE	25.0128	2.6881e-07	242541	78856.9	242033	75395.8	9432.9	9072.87	163684	3.07571	0.487946	0.325128	-1.62092
119	299	tr|A0A224Z0W8|A0A224Z0W8_9ACAR	N/A	N/A	Large subunit ribosomal protein L8e OS=Rhipicephalus zambeziensis PE=3 SV=1	TRUE	-24.9726	2.7139e-07	259781	417467	260870	420460	9173.8	8679.12	-157687	0.622278	-0.206016	1.607	0.68437
120	120	tr|A0A131YVE7|A0A131YVE7_RHIAP	N/A	N/A	Calponin OS=Rhipicephalus appendiculatus PE=4 SV=1	TRUE	24.8582	2.7891e-07	1.93996e+06	765150	1.91371e+06	759320	88986.7	31868	1.17481e+06	2.5354	0.404046	0.394415	-1.34221
121	845	tr|A0A224YZK5|A0A224YZK5_9ACAR	N/A	N/A	Glutathione s-transferase OS=Rhipicephalus zambeziensis PE=4 SV=1	TRUE	24.8094	2.822e-07	45644.8	10502.6	45203.1	10596.1	2451.91	1419.12	35142.2	4.34604	0.638094	0.230094	-2.1197
122	410	tr|A0A224ZAU6|A0A224ZAU6_9ACAR	N/A	N/A	Triosephosphate isomerase OS=Rhipicephalus zambeziensis PE=3 SV=1	TRUE	24.6862	2.9068e-07	209730	88115.5	210082	87434.9	3890.8	9052.05	121614	2.38017	0.376607	0.420139	-1.25106
123	437	tr|L7M7B2|L7M7B2_9ACAR	N/A	N/A	Putative metalloexopeptidase OS=Rhipicephalus pulchellus PE=2 SV=1	TRUE	24.5953	2.9713e-07	94984.8	42569.2	94213.2	42165.5	3482.66	2457.21	52415.6	2.23131	0.348559	0.448168	-1.15789
124	487	tr|A0A131Z4A2|A0A131Z4A2_RHIAP	N/A	N/A	Cystatin OS=Rhipicephalus appendiculatus PE=3 SV=1	TRUE	24.5819	2.9809e-07	98101.6	3799.96	99391.6	3681.97	7358.61	2171.98	94301.7	25.8165	1.4119	0.0387349	-4.69022
125	124	tr|Q4PM69|Q4PM69_IXOSC	N/A	N/A	Histone H4 OS=Ixodes scapularis GN=8030709 PE=2 SV=1	TRUE	-24.5142	3.0302e-07	2.65004e+07	4.11272e+07	2.63451e+07	4.13383e+07	602672	1.02997e+06	-1.46269e+07	0.644351	-0.190877	1.55195	0.634081
126	857	tr|A0A023GBH4|A0A023GBH4_9ACAR	N/A	N/A	Putative secreted protein OS=Amblyomma triste PE=2 SV=1	TRUE	24.3674	3.1404e-07	89345.4	9307.16	88665.6	8993.09	2639.09	6015.86	80038.2	9.59964	0.982255	0.104171	-3.26298
127	154	tr|A0A224YYF6|A0A224YYF6_9ACAR	N/A	N/A	Guanine nucleotide-binding protein OS=Rhipicephalus zambeziensis PE=4 SV=1	TRUE	-24.31	3.1847e-07	25587.9	75954.8	26543.4	75858.1	3569.89	2103.86	-50366.9	0.336883	-0.47252	2.96839	1.56968
128	230	tr|A0A224YR29|A0A224YR29_9ACAR	N/A	N/A	Cytochrome c oxidase subunit 5a OS=Rhipicephalus zambeziensis PE=4 SV=1	TRUE	-24.1808	3.2873e-07	644852	916939	646224	920439	16595.2	15200.2	-272087	0.703266	-0.15288	1.42194	0.507857
129	511	tr|A0A224YHR8|A0A224YHR8_9ACAR	N/A	N/A	TIL domain containing protein OS=Rhipicephalus zambeziensis PE=4 SV=1	TRUE	-24.1585	3.3054e-07	14213.4	48755.7	14314.8	48674.1	1406.29	2489.96	-34542.3	0.291524	-0.535326	3.43025	1.77832
130	117	tr|A0A034WWK3|A0A034WWK3_RHIMP	N/A	N/A	Peptidyl-prolyl cis-trans isomerase OS=Rhipicephalus microplus PE=3 SV=1	TRUE	23.8019	3.6109e-07	47719	8226.03	47857	8200.5	3199.76	879.666	39493	5.80097	0.763501	0.172385	-2.5363
131	104	tr|A0A131YDT0|A0A131YDT0_RHIAP	N/A	N/A	Cofilin OS=Rhipicephalus appendiculatus PE=3 SV=1	TRUE	23.4662	3.9291e-07	1.84533e+06	1.25309e+06	1.84528e+06	1.24905e+06	43087.7	26291.8	592238	1.47262	0.168091	0.679061	-0.558386
132	8	tr|A0A131YWH0|A0A131YWH0_RHIAP	N/A	N/A	Tick thioester protein OS=Rhipicephalus appendiculatus PE=4 SV=1	TRUE	23.4539	3.9413e-07	170255	59333.2	173836	59213.3	8838.63	3368.27	110922	2.86947	0.457801	0.348497	-1.52078
133	418	tr|L7MKC0|L7MKC0_9ACAR	N/A	N/A	Putative alternative splicing factor srp20/9g8 rrm superfamily (Fragment) OS=Rhipicephalus pulchellus PE=2 SV=1	TRUE	23.4463	3.949e-07	519633	313099	522645	311236	16243.2	6822.01	206534	1.65965	0.220016	0.602538	-0.730876
134	558	tr|M1H857|M1H857_RHIAP	N/A	N/A	Ferritin OS=Rhipicephalus appendiculatus GN=FER2 PE=2 SV=1	TRUE	23.4396	3.9557e-07	189257	81397.3	190762	78835.3	6492.84	6522.41	107860	2.3251	0.366442	0.430089	-1.21729
135	428	tr|L7LPR5|L7LPR5_9ACAR	N/A	N/A	Putative tick salivary cystatin OS=Rhipicephalus pulchellus PE=2 SV=1	TRUE	-23.3451	4.0518e-07	39513.6	180807	39276.9	182569	3290.2	11649	-141293	0.218541	-0.660467	4.5758	2.19403
136	212	tr|A0A131Z0F3|A0A131Z0F3_RHIAP	N/A	N/A	Uncharacterized protein OS=Rhipicephalus appendiculatus PE=4 SV=1	TRUE	-23.1946	4.2105e-07	1.61875e+06	2.20699e+06	1.61499e+06	2.20393e+06	38363.5	33180.8	-588239	0.733465	-0.13462	1.36339	0.447199
137	501	tr|L7MGW5|L7MGW5_9ACAR	N/A	N/A	Uncharacterized protein (Fragment) OS=Rhipicephalus pulchellus PE=2 SV=1	TRUE	-23.133	4.2776e-07	524953	934604	516131	933355	19509.3	29559.3	-409651	0.561685	-0.250507	1.78036	0.832167
138	83	tr|A0A131YF72|A0A131YF72_RHIAP	N/A	N/A	Glycine rich superfamily member OS=Rhipicephalus appendiculatus PE=4 SV=1	TRUE	-23.1088	4.3043e-07	8.95258e+06	1.66779e+07	8.88341e+06	1.65352e+07	340718	575275	-7.72529e+06	0.536794	-0.270193	1.86291	0.89756
139	113	tr|F1PIX8|F1PIX8_CANLF	N/A	N/A	Complement C3 OS=Canis lupus familiaris GN=C3 PE=4 SV=2	TRUE	23.0868	4.3287e-07	185563	16342.8	184713	15834.2	13083.6	6612.16	169220	11.3545	1.05517	0.0880712	-3.50519
140	253	tr|A0A1E1XNF6|A0A1E1XNF6_9ACAR	N/A	N/A	Putative quinolinate phosphoribosyl transferase (Fragment) OS=Amblyomma sculptum PE=2 SV=1	TRUE	22.9437	4.4916e-07	172893	96178.1	171764	96245.5	6484.04	1635.78	76714.6	1.79763	0.254701	0.556288	-0.846097
141	473	tr|L7M621|L7M621_9ACAR	N/A	N/A	Putative translocon-associated protein OS=Rhipicephalus pulchellus PE=2 SV=1	TRUE	-22.7023	4.7829e-07	134694	218369	134893	216747	851.547	7322.18	-83675.3	0.616817	-0.209844	1.62123	0.697086
142	384	tr|C9W1I2|C9W1I2_RHISA	N/A	N/A	Putative beta thymosin OS=Rhipicephalus sanguineus PE=2 SV=1	TRUE	22.6948	4.7922e-07	166509	33544.1	168566	34485.2	8110.57	8457.04	132965	4.96388	0.695821	0.201455	-2.31147
143	220	tr|A0A131Z4L0|A0A131Z4L0_RHIAP	N/A	N/A	Glutathione S-transferase OS=Rhipicephalus appendiculatus PE=4 SV=1	TRUE	22.67	4.8234e-07	226821	90801	228111	89683.4	6193.34	10278.2	136020	2.498	0.397592	0.40032	-1.32077
144	70	tr|L7MAK0|L7MAK0_9ACAR	N/A	N/A	Putative acetyl-coa hydrolase OS=Rhipicephalus pulchellus PE=2 SV=1	TRUE	-22.4486	5.1129e-07	522844	992834	518012	988085	22539.5	35288.4	-469990	0.526618	-0.278504	1.89891	0.925171
145	179	tr|A0A224Z3Y0|A0A224Z3Y0_9ACAR	N/A	N/A	RNA-binding protein Musashi OS=Rhipicephalus zambeziensis PE=4 SV=1	TRUE	-22.4394	5.1254e-07	343280	715956	341359	713387	4837.51	32862.1	-372676	0.47947	-0.319238	2.08563	1.06049
146	634	tr|F1PNY2|F1PNY2_CANLF	N/A	N/A	Uncharacterized protein OS=Canis lupus familiaris PE=4 SV=2	TRUE	22.2039	5.4567e-07	94214.1	16176.9	93308.2	15094.9	2725.45	6479.24	78037.2	5.82398	0.76522	0.171704	-2.54201
147	831	tr|A0A147BP26|A0A147BP26_IXORI	N/A	N/A	Putative secreted protein OS=Ixodes ricinus PE=4 SV=1	TRUE	-22.1463	5.5415e-07	261438	444523	262056	439745	4611.03	15878.1	-183085	0.588132	-0.230525	1.7003	0.765787
148	292	tr|E2QUV3|E2QUV3_CANLF	N/A	N/A	Alpha 2-HS glycoprotein OS=Canis lupus familiaris GN=AHSG PE=3 SV=2	TRUE	22.0647	5.6643e-07	107347	13917.2	107214	14875.3	7168.25	4509.49	93430.1	7.7133	0.88724	0.129646	-2.94735
149	403	tr|L7M3F0|L7M3F0_9ACAR	N/A	N/A	Uncharacterized protein OS=Rhipicephalus pulchellus PE=2 SV=1	TRUE	-22.051	5.6853e-07	224986	351701	225578	352687	6373.28	9563.89	-126715	0.639708	-0.194018	1.56321	0.644514
150	235	tr|L7MDB3|L7MDB3_9ACAR	N/A	N/A	Malate dehydrogenase (Fragment) OS=Rhipicephalus pulchellus PE=2 SV=1	TRUE	21.9391	5.8596e-07	306473	190352	307545	189202	6280.12	8521.66	116121	1.61003	0.206835	0.621105	-0.68709
151	448	tr|L7LS09|L7LS09_9ACAR	N/A	N/A	Putative bitil peptide OS=Rhipicephalus pulchellus PE=2 SV=1	TRUE	-21.8498	6.0031e-07	16842.8	55961.6	16702.5	54984.1	1096.63	3408.63	-39118.7	0.300971	-0.521475	3.32257	1.7323
152	151	tr|C9W1T4|C9W1T4_RHISA	N/A	N/A	Putative cement protein (Fragment) OS=Rhipicephalus sanguineus PE=2 SV=1	TRUE	-21.8286	6.0378e-07	3.22173e+06	5.08239e+06	3.21944e+06	5.10879e+06	18147.5	169510	-1.86066e+06	0.633901	-0.197978	1.57753	0.65767
153	178	tr|A0A224YV39|A0A224YV39_9ACAR	N/A	N/A	Nucleoside diphosphate kinase OS=Rhipicephalus zambeziensis PE=3 SV=1	TRUE	21.7433	6.1797e-07	1.29022e+06	937938	1.29647e+06	933712	13616.1	29404.4	352285	1.3756	0.138491	0.726958	-0.460056
154	517	tr|B7PKP2|B7PKP2_IXOSC	N/A	N/A	Uncharacterized protein OS=Ixodes scapularis GN=8053001 PE=4 SV=1	TRUE	21.6966	6.2591e-07	147353	81650.9	146704	81637.7	3077.18	5216.5	65702.4	1.80467	0.256399	0.554116	-0.851739
155	142	tr|G3MM77|G3MM77_9ACAR	N/A	N/A	Uncharacterized protein OS=Amblyomma maculatum PE=2 SV=1	TRUE	21.568	6.4839e-07	435659	243426	432976	246232	8713.01	15551.2	192233	1.7897	0.252779	0.558754	-0.839715
156	648	tr|A0A224YFQ9|A0A224YFQ9_9ACAR	N/A	N/A	Tissue factor pathway inhibitor OS=Rhipicephalus zambeziensis PE=4 SV=1	TRUE	-21.5285	6.5547e-07	10065.8	38340.8	10223.4	37902.9	1447.19	2192.13	-28274.9	0.262536	-0.580811	3.809	1.92941
157	534	tr|A0A131YI86|A0A131YI86_RHIAP	N/A	N/A	Cystatin-A/B OS=Rhipicephalus appendiculatus PE=4 SV=1	TRUE	21.2843	7.0137e-07	62031	6842.04	62504.6	8417.88	3847.83	3476.72	55189	9.06615	0.957423	0.1103	-3.18049
158	328	tr|A0A224Z2T0|A0A224Z2T0_9ACAR	N/A	N/A	Purine nucleoside phosphorylase OS=Rhipicephalus zambeziensis PE=3 SV=1	TRUE	21.0892	7.4074e-07	208016	76687.5	206849	74777.4	6334.31	10723.5	131329	2.71252	0.433373	0.368661	-1.43963
159	46	tr|A0A131YMB0|A0A131YMB0_RHIAP	N/A	N/A	PDZ and LIM domain protein Zasp OS=Rhipicephalus appendiculatus PE=4 SV=1	TRUE	21.085	7.4161e-07	504295	240893	504975	238529	16582.6	18688.4	263403	2.09344	0.320861	0.477682	-1.06588
160	645	tr|G3MN31|G3MN31_9ACAR	N/A	N/A	Uncharacterized protein OS=Amblyomma maculatum PE=2 SV=1	TRUE	20.9623	7.6773e-07	147923	68158.1	146476	67384.5	5175.04	5580.01	79765.2	2.1703	0.336519	0.460766	-1.11789
161	310	tr|G3MKS0|G3MKS0_9ACAR	N/A	N/A	Uncharacterized protein OS=Amblyomma maculatum PE=2 SV=1	TRUE	20.9482	7.708e-07	223814	99656.7	222485	98871.5	10312	5845.93	124157	2.24585	0.35138	0.445266	-1.16726
162	48	tr|A0A131YYR4|A0A131YYR4_RHIAP	N/A	N/A	Heat shock 70kDa protein 1/8 OS=Rhipicephalus appendiculatus PE=3 SV=1	TRUE	20.7226	8.2189e-07	609249	217195	598251	207224	29099.4	24186	392054	2.80508	0.447946	0.356496	-1.48804
163	112	tr|A0A224YYB6|A0A224YYB6_9ACAR	N/A	N/A	Enolase OS=Rhipicephalus zambeziensis PE=3 SV=1	TRUE	20.596	8.523e-07	500457	283955	496640	287473	9056.93	18972.8	216502	1.76245	0.246117	0.567392	-0.817583
164	904	tr|Q6JVM9|Q6JVM9_RHIAP	N/A	N/A	Glutathione S-transferase OS=Rhipicephalus appendiculatus GN=GST PE=2 SV=1	TRUE	20.5599	8.612e-07	465389	90395.7	464266	91174.4	36327	3316.64	374993	5.14836	0.711669	0.194237	-2.36411
165	155	tr|L7M7Z9|L7M7Z9_9ACAR	N/A	N/A	Putative cytochrome c1 OS=Rhipicephalus pulchellus PE=2 SV=1	TRUE	-20.4873	8.7946e-07	101370	211048	100131	210179	3830.67	9998.25	-109678	0.480317	-0.318472	2.08196	1.05794
166	781	tr|L7MAQ2|L7MAQ2_9ACAR	N/A	N/A	Putative glycine rich protein (Fragment) OS=Rhipicephalus pulchellus PE=2 SV=1	TRUE	20.4788	8.8162e-07	22184.8	11445.4	22154.8	11569.5	571.332	879.554	10739.3	1.93831	0.287423	0.515913	-0.9548
167	239	tr|F1PZR4|F1PZR4_CANLF	N/A	N/A	Hemopexin OS=Canis lupus familiaris GN=HPX PE=3 SV=2	TRUE	20.4561	8.8743e-07	166762	36718.7	166889	35923	5710.6	11359.7	130043	4.54159	0.657208	0.220187	-2.1832
168	747	tr|A0A131XBM8|A0A131XBM8_9ACAR	N/A	N/A	Rab GDP dissociation inhibitor OS=Hyalomma excavatum PE=2 SV=1	TRUE	20.4399	8.9159e-07	96806.3	54751.3	97045.9	55163.9	2338.24	3386.11	42055	1.76811	0.247509	0.565576	-0.822208
169	520	tr|L7M096|L7M096_9ACAR	N/A	N/A	Putative toll-like receptor 5 OS=Rhipicephalus pulchellus PE=2 SV=1	TRUE	19.9761	1.0215e-06	211120	74405.8	208877	71611.4	7924.47	11160.5	136714	2.83741	0.452922	0.352434	-1.50458
170	249	tr|L7M1F0|L7M1F0_9ACAR	N/A	N/A	Putative camp-dependent protein kinase r2 OS=Rhipicephalus pulchellus PE=2 SV=1	TRUE	-19.8722	1.0535e-06	220113	289638	222179	290007	5015.83	4878.81	-69525.4	0.759958	-0.119211	1.31586	0.396009
171	231	tr|A0A131YT26|A0A131YT26_RHIAP	N/A	N/A	Cytochrome b-c1 complex subunit Rieske, mitochondrial OS=Rhipicephalus appendiculatus PE=4 SV=1	TRUE	-19.7515	1.0922e-06	342454	518556	341224	520389	13393.5	11772.2	-176102	0.6604	-0.180193	1.51423	0.598589
172	848	tr|A0A224YGY1|A0A224YGY1_9ACAR	N/A	N/A	Serum amyloid A protein OS=Rhipicephalus zambeziensis PE=4 SV=1	TRUE	-19.4341	1.2021e-06	3830.72	28328.4	4121.13	27986	1253.67	2187.29	-24497.7	0.135225	-0.868941	7.39506	2.88656
173	52	tr|C9W1U0|C9W1U0_RHISA	N/A	N/A	Putative cement protein (Fragment) OS=Rhipicephalus sanguineus PE=2 SV=1	TRUE	-19.4115	1.2104e-06	4.25159e+07	1.0478e+08	4.25344e+07	1.04582e+08	888806	6.35333e+06	-6.22644e+07	0.405762	-0.391728	2.4645	1.30129
174	186	tr|A0A224Z184|A0A224Z184_9ACAR	N/A	N/A	Uncharacterized protein OS=Rhipicephalus zambeziensis PE=4 SV=1	TRUE	19.0263	1.3628e-06	1.29716e+06	833340	1.30532e+06	833603	21935.1	43542.3	463816	1.55658	0.19217	0.642436	-0.638375
175	26	tr|A0A131ZDX3|A0A131ZDX3_RHIAP	N/A	N/A	TIL domain containing protein (Fragment) OS=Rhipicephalus appendiculatus PE=4 SV=1	TRUE	18.9662	1.3885e-06	892050	660506	893229	662190	14756.7	19452.6	231544	1.35056	0.130512	0.740436	-0.433553
176	91	tr|A0A131YJK6|A0A131YJK6_RHIAP	N/A	N/A	Acetyl-CoA acyltransferase 2 OS=Rhipicephalus appendiculatus PE=3 SV=1	TRUE	-18.8078	1.4591e-06	288038	496338	288395	497208	5605.54	21429.4	-208300	0.580326	-0.236328	1.72317	0.785066
177	788	tr|Q9XYR3|Q9XYR3_RHIMP	N/A	N/A	Carboxylesterase-related protein (Fragment) OS=Rhipicephalus microplus PE=2 SV=1	TRUE	18.6928	1.513e-06	227820	66543.2	228620	65100.8	14808.8	8857.34	161277	3.42364	0.534489	0.292086	-1.77553
178	436	tr|A0A1E1XH73|A0A1E1XH73_9ACAR	N/A	N/A	Putative cysteine s-methyltransferase (Fragment) OS=Amblyomma aureolatum PE=2 SV=1	TRUE	-18.6844	1.517e-06	114008	160926	114083	159801	1748.59	4707.89	-46917.7	0.708452	-0.14969	1.41153	0.497258
179	54	tr|A0A224Z4I9|A0A224Z4I9_9ACAR	N/A	N/A	Mitochondrial-processing peptidase subunit beta OS=Rhipicephalus zambeziensis PE=3 SV=1	TRUE	-18.6399	1.5386e-06	184939	395891	186686	402951	11464.7	19516	-210952	0.467147	-0.330547	2.14065	1.09805
180	33	tr|A0A131XJV6|A0A131XJV6_9ACAR	N/A	N/A	Putative glutamate/leucine/phenylalanine/valine dehydrogenase OS=Hyalomma excavatum PE=2 SV=1	TRUE	-18.4354	1.6422e-06	1.52757e+06	2.25277e+06	1.53416e+06	2.24176e+06	21482.7	75685.2	-725202	0.678085	-0.168716	1.47474	0.560462
181	95	tr|L7MG42|L7MG42_9ACAR	N/A	N/A	Putative alkyl hydroperoxide reductase thiol specific antioxidant (Fragment) OS=Rhipicephalus pulchellus PE=2 SV=1	TRUE	18.366	1.6792e-06	1.13606e+06	587628	1.13741e+06	591088	24837.4	54312.9	548434	1.9333	0.2863	0.51725	-0.951067
182	38	tr|A0A224YXN0|A0A224YXN0_9ACAR	N/A	N/A	Elongation factor 1-alpha OS=Rhipicephalus zambeziensis PE=3 SV=1	TRUE	18.1804	1.7831e-06	4.69851e+06	3.6558e+06	4.71586e+06	3.6418e+06	80399.8	81814.5	1.04271e+06	1.28522	0.108978	0.778076	-0.362017
183	137	tr|L7M7R7|L7M7R7_9ACAR	N/A	N/A	Putative atp synthase subunit b OS=Rhipicephalus pulchellus PE=2 SV=1	TRUE	-18.0799	1.8424e-06	367062	651312	367158	648816	18908.3	25123.4	-284250	0.563573	-0.24905	1.77439	0.827325
184	324	tr|E2R7W6|E2R7W6_CANLF	N/A	N/A	Uncharacterized protein OS=Canis lupus familiaris GN=KRT42 PE=3 SV=1	TRUE	-18.0594	1.8548e-06	119367	286044	119814	291557	4643.85	17865.1	-166677	0.417304	-0.379548	2.39634	1.26083
185	293	tr|A0A131XDY8|A0A131XDY8_9ACAR	N/A	N/A	Putative small heat shock protein ii OS=Hyalomma excavatum PE=2 SV=1	TRUE	17.9953	1.8941e-06	347479	240798	348820	242087	5364.9	10573.4	106681	1.44303	0.159277	0.692984	-0.529105
186	35	tr|A0A0C5PNS0|A0A0C5PNS0_RHISA	N/A	N/A	60S acidic ribosomal protein P0 (Fragment) OS=Rhipicephalus sanguineus PE=2 SV=1	TRUE	17.9012	1.9537e-06	1.07545e+06	785040	1.08299e+06	778195	25455.1	20118.9	290410	1.36993	0.136698	0.729964	-0.454102
187	391	tr|A0A224YU86|A0A224YU86_9ACAR	N/A	N/A	Myosin heavy chain 6/7 OS=Rhipicephalus zambeziensis PE=3 SV=1	TRUE	-17.8501	1.987e-06	53037.3	147491	50620.8	147781	8779.22	5909.7	-94453.4	0.359597	-0.444183	2.78089	1.47555
188	694	tr|A0A131YE25|A0A131YE25_RHIAP	N/A	N/A	Annexin OS=Rhipicephalus appendiculatus PE=3 SV=1	TRUE	17.8246	2.0038e-06	176730	119988	176658	121368	4352.7	4646.4	56741.9	1.4729	0.168173	0.678933	-0.558658
189	17	tr|L7MAA0|L7MAA0_9ACAR	N/A	N/A	ATP synthase subunit alpha OS=Rhipicephalus pulchellus PE=2 SV=1	TRUE	-17.7595	2.0475e-06	1.46477e+06	2.54919e+06	1.45779e+06	2.56781e+06	86773.7	85933	-1.08443e+06	0.574599	-0.240635	1.74034	0.799371
190	545	tr|L7MJR7|L7MJR7_9ACAR	N/A	N/A	Putative phosphoglycerate mutase (Fragment) OS=Rhipicephalus pulchellus PE=2 SV=1	TRUE	17.7572	2.0491e-06	116726	59150.9	116955	59091.5	5132.64	3963.27	57575.2	1.97336	0.295206	0.50675	-0.980655
191	751	tr|A0A131XM47|A0A131XM47_9ACAR	N/A	N/A	NADH dehydrogenase [ubiquinone] flavoprotein 1, mitochondrial OS=Hyalomma excavatum PE=2 SV=1	TRUE	-17.7269	2.0699e-06	17133.6	58114.1	17471.8	58444.8	4423.68	1344.67	-40980.4	0.294828	-0.530431	3.39181	1.76205
192	765	tr|L7M4W5|L7M4W5_9ACAR	N/A	N/A	60S ribosomal protein L13 OS=Rhipicephalus pulchellus PE=2 SV=1	TRUE	-17.7018	2.0872e-06	245032	453119	239298	461350	13646.7	19144.3	-208088	0.540766	-0.266991	1.84923	0.886923
193	610	tr|F1PCG4|F1PCG4_CANLF	N/A	N/A	Peroxiredoxin 2 OS=Canis lupus familiaris GN=PRDX2 PE=4 SV=2	TRUE	17.686	2.0983e-06	49206.1	4186.03	49507	3347.48	4205.89	2868.68	45020	11.7548	1.07022	0.0850714	-3.55518
194	835	tr|A0A131XIE3|A0A131XIE3_9ACAR	N/A	N/A	Aspartate aminotransferase OS=Hyalomma excavatum PE=2 SV=1	TRUE	17.2814	2.4052e-06	34801.3	4100.55	35668.4	3354.79	2428.18	2593.84	30700.7	8.48699	0.928754	0.117827	-3.08525
195	82	tr|A0A131XPK7|A0A131XPK7_9ACAR	N/A	N/A	Putative basement membrane-specific heparan sulfate proteoglycan core protein (Fragment) OS=Hyalomma excavatum PE=2 SV=1	TRUE	-17.2369	2.442e-06	32391.5	236276	36189.3	233160	10209.2	21340.5	-203885	0.137092	-0.862989	7.2944	2.86679
196	351	tr|L7M574|L7M574_9ACAR	N/A	N/A	Putative 60s ribosomal protein l13a OS=Rhipicephalus pulchellus PE=2 SV=1	TRUE	-17.2091	2.4654e-06	335665	451881	335139	452607	7414.32	11289.3	-116216	0.742818	-0.129118	1.34622	0.42892
197	651	tr|L7M2X3|L7M2X3_9ACAR	N/A	N/A	Putative mitochondrial electron transport nadh to ubiquinone OS=Rhipicephalus pulchellus PE=2 SV=1	TRUE	-17.1171	2.5445e-06	66884.5	128595	67299.2	127738	5399.93	4778.09	-61710.2	0.520118	-0.283898	1.92264	0.943088
198	13	tr|F2Z4Q6|F2Z4Q6_CANLF	N/A	N/A	Serum albumin OS=Canis lupus familiaris GN=ALB PE=3 SV=1	TRUE	17.0783	2.5788e-06	69120.3	22933.1	68701	23052.4	4986.98	2094.33	46187.3	3.01401	0.479144	0.331784	-1.59168
199	595	tr|A0A224Z9G4|A0A224Z9G4_9ACAR	N/A	N/A	Sulfotransferase OS=Rhipicephalus zambeziensis PE=4 SV=1	TRUE	-17.0746	2.5821e-06	58433.4	115689	58348.7	115167	2202.4	6334.53	-57255.2	0.505092	-0.296629	1.97984	0.985381
200	803	tr|B7QJ07|B7QJ07_IXOSC	N/A	N/A	Uncharacterized protein OS=Ixodes scapularis GN=8041974 PE=4 SV=1	TRUE	-16.9945	2.6546e-06	19746.7	50261.8	19785.4	50087.5	1768.37	3125.59	-30515.1	0.392877	-0.405743	2.54533	1.34785
201	608	tr|G3MLX1|G3MLX1_9ACAR	N/A	N/A	Uncharacterized protein OS=Amblyomma maculatum PE=2 SV=1	TRUE	-16.9009	2.7424e-06	66851.5	155913	67629.9	152479	3620.85	9897.66	-89061	0.428776	-0.36777	2.33222	1.2217
202	829	tr|C9W1A6|C9W1A6_RHISA	N/A	N/A	Putative cement protein (Fragment) OS=Rhipicephalus sanguineus PE=2 SV=1	TRUE	-16.8708	2.7714e-06	4419.91	1.87583e+06	4981.66	1.85097e+06	2536.1	221837	-1.87141e+06	0.00235624	-2.62778	424.404	8.7293
203	726	tr|B7P573|B7P573_IXOSC	N/A	N/A	Processing peptidase beta subunit, putative OS=Ixodes scapularis GN=8024783 PE=3 SV=1	TRUE	-16.7969	2.844e-06	80324.6	144050	80852.1	144742	3588.09	6685.73	-63725.1	0.557617	-0.253664	1.79335	0.842653
204	901	tr|B7P858|B7P858_IXOSC	N/A	N/A	Low-density lipoprotein receptor, putative OS=Ixodes scapularis GN=8026014 PE=4 SV=1	TRUE	-16.7773	2.8637e-06	14412.6	28109.9	14375.5	28175.8	1214.63	1091.26	-13697.3	0.512723	-0.290117	1.95037	0.963749
205	73	tr|A0A224Z4Y6|A0A224Z4Y6_9ACAR	N/A	N/A	Protein disulfide-isomerase OS=Rhipicephalus zambeziensis PE=3 SV=1	TRUE	16.7699	2.8711e-06	543851	389318	545693	389039	16091.2	8985.35	154534	1.39693	0.145176	0.715853	-0.482264
206	867	tr|A0A224YLA3|A0A224YLA3_9ACAR	N/A	N/A	Uncharacterized protein OS=Rhipicephalus zambeziensis PE=4 SV=1	TRUE	-16.6479	2.9973e-06	127780	297987	127312	296459	5509.38	19691.7	-170207	0.42881	-0.367735	2.33204	1.22159
207	617	tr|L7M0L6|L7M0L6_9ACAR	N/A	N/A	Putative rna-binding protein elav/hu rrm superfamily OS=Rhipicephalus pulchellus PE=2 SV=1	TRUE	16.5848	3.065e-06	125073	76419.6	124909	77172.6	4957.16	3138.57	48653.2	1.63666	0.213958	0.611001	-0.710754
208	525	tr|A0A131YQW8|A0A131YQW8_RHIAP	N/A	N/A	Lipocalin OS=Rhipicephalus appendiculatus PE=4 SV=1	TRUE	-16.5198	3.1367e-06	24093.2	176059	17100.3	176194	17537.1	5561.89	-151966	0.136847	-0.863764	7.30742	2.86936
209	365	tr|A0A131YH63|A0A131YH63_RHIAP	N/A	N/A	Peptidoglycan recognition protein OS=Rhipicephalus appendiculatus PE=4 SV=1	TRUE	-16.4113	3.2607e-06	16531.7	96146	17872.4	93465.8	6780.86	6939.42	-79614.3	0.171944	-0.764613	5.81584	2.53999
210	241	tr|V5HJX3|V5HJX3_IXORI	N/A	N/A	Histone H2A OS=Ixodes ricinus PE=2 SV=1	TRUE	-16.3816	3.2957e-06	505690	1.10634e+06	504114	1.11119e+06	26676.3	68307.7	-600647	0.457085	-0.340003	2.18778	1.12947
211	39	tr|A0A224YPR9|A0A224YPR9_9ACAR	N/A	N/A	Catalase OS=Rhipicephalus zambeziensis PE=3 SV=1	TRUE	16.3443	3.3402e-06	1.51922e+06	892519	1.52632e+06	871455	23427.2	73021	626699	1.70217	0.231002	0.587486	-0.767374
212	307	tr|L7N095|L7N095_CANLF	N/A	N/A	Keratin 5 OS=Canis lupus familiaris GN=KRT5 PE=3 SV=1	TRUE	-16.2791	3.4198e-06	223332	570509	222483	563299	10139.2	41430.5	-347177	0.391461	-0.407311	2.55453	1.35306
213	567	tr|A0A131XTW8|A0A131XTW8_IXORI	N/A	N/A	Putative muscle m-line assembly protein unc-89 (Fragment) OS=Ixodes ricinus PE=2 SV=1	TRUE	16.2476	3.4589e-06	258907	182087	256699	180939	7496.17	5764.25	76820.1	1.42189	0.152865	0.703291	-0.507806
214	804	tr|B7PRW2|B7PRW2_IXOSC	N/A	N/A	Insect cuticle domaincontaining protein OS=Ixodes scapularis GN=8030449 PE=4 SV=1	TRUE	16.0426	3.7272e-06	183734	133845	183543	134568	3969.01	4788.54	49888.9	1.37274	0.137587	0.728472	-0.457054
215	128	tr|A0A224Z4W7|A0A224Z4W7_9ACAR	N/A	N/A	Myosin regulatory light chain ef hand protein superfamily OS=Rhipicephalus zambeziensis PE=4 SV=1	TRUE	15.9912	3.7982e-06	823530	688905	825308	685749	10188.5	13404.9	134625	1.19542	0.07752	0.836527	-0.257516
216	771	tr|A0A224Y9I2|A0A224Y9I2_9ACAR	N/A	N/A	Glycine rich superfamily member (Fragment) OS=Rhipicephalus zambeziensis PE=4 SV=1	TRUE	-15.9791	3.815e-06	12535.8	74658.1	14624	74171.4	6663.83	4006.34	-62122.4	0.167909	-0.774926	5.95561	2.57425
217	203	tr|L7M7D4|L7M7D4_9ACAR	N/A	N/A	Putative nadh:ubiquinone oxidoreductase ndufv2/24 kd subunit OS=Rhipicephalus pulchellus PE=2 SV=1	TRUE	-15.9543	3.8501e-06	285225	553476	283342	552968	11001.5	31776.8	-268251	0.515334	-0.287911	1.94049	0.956419
218	755	tr|A0A224YRN6|A0A224YRN6_9ACAR	N/A	N/A	2,3-bisphosphoglycerate-independent phosphoglycerate mutase OS=Rhipicephalus zambeziensis PE=3 SV=1	TRUE	15.7675	4.1261e-06	75809.1	5815.74	75205.4	1697.29	2217.48	8596.83	69993.4	13.0352	1.11512	0.0767155	-3.70434
219	875	tr|A0A131XAM3|A0A131XAM3_9ACAR	N/A	N/A	Putative secreted salivary gland peptide OS=Hyalomma excavatum PE=2 SV=1	TRUE	15.7263	4.19e-06	63997.8	3790.77	61917.7	3325.57	7477.98	1645.39	60207	16.8825	1.22744	0.0592329	-4.07746
220	536	tr|L7M9B9|L7M9B9_9ACAR	N/A	N/A	Putative amblyomma 40-33 family member OS=Rhipicephalus pulchellus PE=2 SV=1	TRUE	15.693	4.2425e-06	102060	63112.4	101652	63022	2797.32	4100.44	38947.8	1.61712	0.208742	0.618384	-0.693425
221	570	tr|A0A224YEW2|A0A224YEW2_9ACAR	N/A	N/A	Glycine rich superfamily member (Fragment) OS=Rhipicephalus zambeziensis PE=4 SV=1	TRUE	-15.6226	4.356e-06	76766.1	171992	76594.1	170849	3869.83	11560.2	-95225.9	0.446335	-0.350339	2.24047	1.1638
222	368	tr|A0A224YRZ4|A0A224YRZ4_9ACAR	N/A	N/A	Isocitrate dehydrogenase [NAD] subunit, mitochondrial OS=Rhipicephalus zambeziensis PE=3 SV=1	TRUE	-15.5928	4.4052e-06	86223	130016	84535.8	130534	3576.31	4331.49	-43793.1	0.663172	-0.178374	1.50791	0.592546
223	574	tr|A0A131YMS3|A0A131YMS3_RHIAP	N/A	N/A	Aldehyde dehydrogenase (NAD+) OS=Rhipicephalus appendiculatus PE=3 SV=1	TRUE	15.5917	4.407e-06	88283.1	39949.6	87610.1	38926	5083.75	3548.85	48333.5	2.20986	0.344365	0.452517	-1.14396
224	653	tr|Q2VMW1|Q2VMW1_DERAN	N/A	N/A	Histamine release factor OS=Dermacentor andersoni PE=2 SV=1	TRUE	15.4452	4.6582e-06	50166.1	20900.7	50460	20566.2	3233.34	1976.46	29265.4	2.40021	0.380249	0.41663	-1.26316
225	510	tr|A0A224YIL5|A0A224YIL5_9ACAR	N/A	N/A	Uncharacterized protein OS=Rhipicephalus zambeziensis PE=4 SV=1	TRUE	15.4338	4.6784e-06	120733	16390.2	115754	17050.3	13323.5	2304.35	104343	7.36617	0.867242	0.135756	-2.88091
226	499	tr|Q4PM27|Q4PM27_IXOSC	N/A	N/A	Ribosomal protein L11 OS=Ixodes scapularis GN=8025561 PE=2 SV=1	TRUE	-15.4028	4.734e-06	95905.8	150383	94982.9	149375	4878.08	5122.67	-54477.5	0.637742	-0.195355	1.56803	0.648954
227	36	tr|A0A224ZC41|A0A224ZC41_9ACAR	N/A	N/A	Z band alternatively spliced pdz motif protein 66 OS=Rhipicephalus zambeziensis PE=4 SV=1	TRUE	15.3642	4.8041e-06	1.89751e+06	1.29241e+06	1.90367e+06	1.31788e+06	32772.7	71627.1	605110	1.4682	0.166786	0.681104	-0.554053
228	395	tr|A0A224Z0G4|A0A224Z0G4_9ACAR	N/A	N/A	Heterogeneous nuclear ribonucleoprotein U-like protein 1 OS=Rhipicephalus zambeziensis PE=4 SV=1	TRUE	-15.3274	4.8723e-06	139797	174118	140277	175957	1451.62	4236.66	-34321.4	0.802884	-0.0953471	1.24551	0.316736
229	12	tr|A0A131YSR5|A0A131YSR5_RHIAP	N/A	N/A	Vitellogenin B OS=Rhipicephalus appendiculatus PE=4 SV=1	TRUE	15.2917	4.9393e-06	819900	349805	838236	353840	53890.7	29597.4	470095	2.34388	0.369935	0.426644	-1.2289
230	312	tr|A0A131YV69|A0A131YV69_RHIAP	N/A	N/A	Serine carboxypeptidase OS=Rhipicephalus appendiculatus PE=3 SV=1	TRUE	15.2867	4.9489e-06	92240	24668.7	91465.8	24819.3	3985.83	7891.02	67571.4	3.73915	0.572773	0.26744	-1.90271
231	153	tr|A0A224Z1V0|A0A224Z1V0_9ACAR	N/A	N/A	Elongation factor Tu OS=Rhipicephalus zambeziensis PE=3 SV=1	TRUE	-15.2117	5.0937e-06	208425	302631	206190	305089	5271.7	11208.1	-94205.9	0.68871	-0.161964	1.45199	0.538032
232	254	tr|A0A224YUJ4|A0A224YUJ4_9ACAR	N/A	N/A	Leucyl aminopeptidase OS=Rhipicephalus zambeziensis PE=4 SV=1	TRUE	15.1126	5.2929e-06	184391	65387.9	184546	59341.4	6606.16	14296.3	119003	2.81995	0.450242	0.354616	-1.49567
233	62	tr|L7MEG0|L7MEG0_9ACAR	N/A	N/A	Putative heat shock protein (Fragment) OS=Rhipicephalus pulchellus PE=2 SV=1	TRUE	14.9963	5.5383e-06	522871	342226	519747	344847	14372.1	19335.7	180645	1.52785	0.184082	0.654513	-0.611507
234	715	tr|A0A224Z2Z3|A0A224Z2Z3_9ACAR	N/A	N/A	Ubiquitin carboxyl-terminal hydrolase OS=Rhipicephalus zambeziensis PE=3 SV=1	TRUE	14.922	5.702e-06	33754.1	14530.4	34082.7	14403	1366.88	2184.11	19223.7	2.32299	0.366048	0.430479	-1.21599
235	313	tr|L7M7R5|L7M7R5_9ACAR	N/A	N/A	Putative cathepsin d isoform 1 protein OS=Rhipicephalus pulchellus PE=2 SV=1	TRUE	14.8833	5.7894e-06	322048	181354	320039	177379	8834.06	16715.5	140694	1.7758	0.249393	0.563128	-0.828465
236	586	tr|A0A224YSU8|A0A224YSU8_9ACAR	N/A	N/A	M20 domain containing peptidase OS=Rhipicephalus zambeziensis PE=4 SV=1	TRUE	14.7814	6.0271e-06	46468.7	9346.11	46852.2	10409.9	2423.23	4399.68	37122.6	4.97198	0.69653	0.201127	-2.31382
237	140	tr|V5I1T0|V5I1T0_IXORI	N/A	N/A	Histone H2B OS=Ixodes ricinus PE=2 SV=1	TRUE	-14.7567	6.0865e-06	1.8307e+07	2.91787e+07	1.82809e+07	2.94118e+07	640041	1.32718e+06	-1.08717e+07	0.627411	-0.202448	1.59385	0.672517
238	295	tr|Q4PMD3|Q4PMD3_IXOSC	N/A	N/A	40S ribosomal protein S10 OS=Ixodes scapularis GN=8043970 PE=2 SV=1	TRUE	-14.715	6.1883e-06	380026	473080	378567	473237	6493.86	10853	-93053.5	0.803303	-0.0951208	1.24486	0.315984
239	489	sp|P49822|ALBU_CANLF	N/A	N/A	Serum albumin OS=Canis lupus familiaris GN=ALB PE=1 SV=3	TRUE	14.4722	6.8215e-06	47279.6	17924.7	47519.5	18388.6	2706.34	3022.05	29354.9	2.63768	0.421223	0.37912	-1.39927
240	275	tr|L7N0F2|L7N0F2_CANLF	N/A	N/A	Uncharacterized protein OS=Canis lupus familiaris PE=4 SV=1	TRUE	14.4204	6.9664e-06	55883	3822.59	57301.9	3747.34	6685.58	2727.13	52060.4	14.6191	1.16492	0.0684035	-3.86979
241	644	tr|A0A0C9RSH1|A0A0C9RSH1_AMBAM	N/A	N/A	Putative ribosomal protein s15aa (Fragment) OS=Amblyomma americanum PE=2 SV=1	TRUE	-14.4142	6.9839e-06	112261	172348	111183	170543	5162.86	6546.27	-60086.9	0.651363	-0.186177	1.53524	0.618466
242	477	tr|L7MLA8|L7MLA8_9ACAR	N/A	N/A	Putative head-elevated expression protein (Fragment) OS=Rhipicephalus pulchellus PE=2 SV=1	TRUE	-14.4065	7.0056e-06	68270.6	107662	68711.3	107346	1741.36	5183.9	-39391.6	0.634119	-0.197829	1.57699	0.657175
243	892	tr|C9W1C1|C9W1C1_RHISA	N/A	N/A	NADH CoQ oxidoreductase subunit B18 OS=Rhipicephalus sanguineus PE=2 SV=1	TRUE	-14.3952	7.0379e-06	32434.1	48811.5	32541.1	48525.6	1465.52	1740.6	-16377.4	0.664477	-0.17752	1.50494	0.58971
244	196	tr|A0A224YG94|A0A224YG94_9ACAR	N/A	N/A	Phosphoglycerate kinase OS=Rhipicephalus zambeziensis PE=3 SV=1	TRUE	14.3454	7.1822e-06	333189	262561	332230	265291	6626.82	7283.11	70627.7	1.269	0.10346	0.788025	-0.343687
245	809	tr|A0A224Z418|A0A224Z418_9ACAR	N/A	N/A	Phenylpyruvate tautomerase OS=Rhipicephalus zambeziensis PE=4 SV=1	TRUE	14.3291	7.2301e-06	37290.3	10220.3	37239.6	9538.98	1306.92	3545.11	27070.1	3.64867	0.562134	0.274073	-1.86737
246	869	tr|Q8I862|Q8I862_DERVA	N/A	N/A	Factor D-like protein OS=Dermacentor variabilis PE=2 SV=1	TRUE	14.2724	7.3997e-06	31210.4	10904.8	31400.2	10667.9	1652.78	2316.2	20305.6	2.86207	0.45668	0.349397	-1.51706
247	669	tr|L7ME67|L7ME67_9ACAR	N/A	N/A	Putative glycine rich protein (Fragment) OS=Rhipicephalus pulchellus PE=2 SV=1	TRUE	-14.2303	7.5286e-06	18299.9	64142.9	18373.7	62365	266.779	6437.47	-45843	0.2853	-0.544699	3.50509	1.80945
248	905	tr|A0A224YYK7|A0A224YYK7_9ACAR	N/A	N/A	Salivary sulfotransferase OS=Rhipicephalus zambeziensis PE=4 SV=1	TRUE	-14.1989	7.6267e-06	2399.84	18722.4	2170.75	17974.1	1303.9	1893.65	-16322.6	0.12818	-0.89218	7.80153	2.96376
249	449	tr|A0A023G4G2|A0A023G4G2_9ACAR	N/A	N/A	Putative cuticular protein 76bd OS=Amblyomma triste PE=2 SV=1	TRUE	-14.1733	7.7076e-06	143832	238876	148687	235664	10747.1	8023.48	-95044.3	0.602119	-0.220317	1.6608	0.731879
250	72	tr|L7M073|L7M073_9ACAR	N/A	N/A	Putative heteroproteinous nuclear ribonucleoprotein r rrm superfamily OS=Rhipicephalus pulchellus PE=2 SV=1	TRUE	14.1647	7.7349e-06	1.78277e+06	828396	1.77909e+06	876749	74092.6	112556	954377	2.15208	0.332858	0.464667	-1.10573
251	453	tr|A0A131Z235|A0A131Z235_RHIAP	N/A	N/A	Carboxylic ester hydrolase OS=Rhipicephalus appendiculatus PE=3 SV=1	TRUE	-14.1318	7.8408e-06	21106	81004.3	20983.9	83600.8	2007.63	8235.93	-59898.3	0.260554	-0.584103	3.83798	1.94035
252	766	tr|B7PNL8|B7PNL8_IXOSC	N/A	N/A	Cysteine proteinase, putative (Fragment) OS=Ixodes scapularis GN=8053944 PE=3 SV=1	TRUE	-14.0289	8.1829e-06	154789	247565	157336	247334	10547	7980.9	-92775.4	0.625248	-0.203948	1.59937	0.6775
253	5	tr|L7LWI3|L7LWI3_9ACAR	N/A	N/A	Putative lipoprotein amino terminal region OS=Rhipicephalus pulchellus PE=2 SV=1	TRUE	14.0196	8.2148e-06	4.30872e+06	1.11564e+06	4.24539e+06	1.12025e+06	451267	62076.4	3.19308e+06	3.86209	0.586823	0.258927	-1.94938
254	240	tr|A0A224Z2T5|A0A224Z2T5_9ACAR	N/A	N/A	Large subunit ribosomal protein L3e OS=Rhipicephalus zambeziensis PE=3 SV=1	TRUE	-13.8708	8.7434e-06	127570	216028	125879	220428	5315.91	11594.1	-88458.4	0.590523	-0.228763	1.69341	0.759934
255	603	tr|L7MBP6|L7MBP6_9ACAR	N/A	N/A	Putative pterin carbinolamine dehydratase pcbd/dimerization cofactor of hnf1 (Fragment) OS=Rhipicephalus pulchellus PE=2 SV=1	TRUE	13.6817	9.473e-06	35723.3	9894.42	35348.5	10977	1801.39	3318.26	25828.9	3.61045	0.557561	0.276974	-1.85218
256	99	tr|A0A224YYZ8|A0A224YYZ8_9ACAR	N/A	N/A	Fructose-bisphosphate aldolase OS=Rhipicephalus zambeziensis PE=3 SV=1	TRUE	13.5669	9.9504e-06	847253	533359	854315	532312	35496.7	29685.7	313895	1.58852	0.200994	0.629515	-0.667688
257	169	tr|L7M6Z0|L7M6Z0_9ACAR	N/A	N/A	Putative rap1a member of ras oncoprotein family OS=Rhipicephalus pulchellus PE=2 SV=1	TRUE	-13.5645	9.9605e-06	418868	582178	418152	582092	17150.9	16900.8	-163309	0.719485	-0.142978	1.38988	0.474963
258	278	tr|L7MAW2|L7MAW2_9ACAR	N/A	N/A	Uncharacterized protein OS=Rhipicephalus pulchellus PE=2 SV=1	TRUE	-13.5587	9.9856e-06	21588.6	79703.5	22023.4	82062.2	3892.01	7637.91	-58114.9	0.270861	-0.567253	3.69193	1.88437
259	150	tr|A0A131YYU5|A0A131YYU5_RHIAP	N/A	N/A	Adenylate cyclase terminal differentiation specific OS=Rhipicephalus appendiculatus PE=4 SV=1	TRUE	13.5091	1.0201e-05	359079	225100	358237	231192	5044.69	19183.1	133979	1.5952	0.202815	0.626881	-0.673737
260	63	tr|A0A224Z2M8|A0A224Z2M8_9ACAR	N/A	N/A	Isocitrate dehydrogenase [NADP] OS=Rhipicephalus zambeziensis PE=3 SV=1	TRUE	13.5045	1.0222e-05	663844	321363	678303	318718	49221.4	12242.7	342481	2.06571	0.31507	0.484094	-1.04664
261	301	tr|F1PCK2|F1PCK2_CANLF	N/A	N/A	Alpha-1-B glycoprotein OS=Canis lupus familiaris GN=A1BG PE=4 SV=2	TRUE	13.374	1.0817e-05	428321	70901.4	428355	69004.2	12270.1	52022.4	357419	6.04108	0.781114	0.165533	-2.59481
262	187	tr|A0A131YF77|A0A131YF77_RHIAP	N/A	N/A	Elongation factor 1-gamma OS=Rhipicephalus appendiculatus PE=4 SV=1	TRUE	13.3686	1.0843e-05	237481	148308	233776	149883	10944.5	7628.21	89172.2	1.60126	0.204462	0.624507	-0.67921
263	389	tr|L7M3U7|L7M3U7_9ACAR	N/A	N/A	Putative myosin light chain cytoplasmic OS=Rhipicephalus pulchellus PE=2 SV=1	TRUE	13.3603	1.0882e-05	151275	125802	151334	126217	2918.11	2454.55	25472.5	1.20248	0.0800781	0.831614	-0.266014
264	568	tr|F1P841|F1P841_CANLF	N/A	N/A	GC, vitamin D binding protein OS=Canis lupus familiaris GN=GC PE=3 SV=2	TRUE	13.3463	1.0949e-05	131937	12935	127934	13483.6	17779.3	1382.72	119002	10.2	1.0086	0.0980388	-3.3505
265	123	tr|L7MAZ4|L7MAZ4_9ACAR	N/A	N/A	3-hydroxyisobutyryl-CoA hydrolase, mitochondrial OS=Rhipicephalus pulchellus PE=2 SV=1	TRUE	13.3347	1.1004e-05	240877	197555	240116	196285	3481.16	5486.34	43321.7	1.21929	0.0861068	0.82015	-0.286041
266	353	tr|C9W1R6|C9W1R6_RHISA	N/A	N/A	Hematopoietic stem/progenitor cells protein-like protein OS=Rhipicephalus sanguineus PE=2 SV=1	TRUE	-13.3184	1.1083e-05	111853	182309	111845	184820	897.592	10542.2	-70456.6	0.613532	-0.212162	1.62991	0.704789
267	849	tr|G3MSP2|G3MSP2_9ACAR	N/A	N/A	Uncharacterized protein OS=Amblyomma maculatum PE=2 SV=1	TRUE	13.2757	1.1292e-05	194657	121455	197464	121797	10963.7	1188.93	73202.1	1.60271	0.204855	0.623943	-0.680513
268	690	tr|A0A1E1XED9|A0A1E1XED9_9ACAR	N/A	N/A	Putative methyltransferase OS=Amblyomma aureolatum PE=2 SV=1	TRUE	13.2722	1.131e-05	36949.2	21827.5	36580.7	22081.7	2210.19	554.595	15121.7	1.69278	0.228601	0.590743	-0.759397
269	135	tr|A0A224YQG5|A0A224YQG5_9ACAR	N/A	N/A	Glutamine synthetase OS=Rhipicephalus zambeziensis PE=3 SV=1	TRUE	-13.171	1.1825e-05	315844	580687	322494	592208	25224.8	31321.5	-264844	0.543913	-0.26447	1.83853	0.878551
270	229	tr|L7M6Q0|L7M6Q0_9ACAR	N/A	N/A	Eukaryotic translation initiation factor 5A OS=Rhipicephalus pulchellus PE=2 SV=1	TRUE	-13.1707	1.1827e-05	111493	200956	113932	202559	6669.4	11835.3	-89462.8	0.554813	-0.255853	1.80241	0.849926
271	671	tr|L7M4J4|L7M4J4_9ACAR	N/A	N/A	Putative histone macroh2a1.1 strongylocentrotus purpuratus: similar to histone OS=Rhipicephalus pulchellus PE=2 SV=1	TRUE	-13.145	1.1962e-05	33444.8	46949.6	33386.4	47068.1	475.046	1999.07	-13504.8	0.712356	-0.147303	1.40379	0.48933
272	843	tr|L7M9R9|L7M9R9_9ACAR	N/A	N/A	Putative dnaj domain prokaryotic heat shock protein OS=Rhipicephalus pulchellus PE=2 SV=1	TRUE	-13.1312	1.2036e-05	3676.79	28556.4	3473.3	28522.7	460.599	3761.3	-24879.6	0.128755	-0.890235	7.76666	2.9573
273	180	tr|A0A224YID5|A0A224YID5_9ACAR	N/A	N/A	40S ribosomal protein S7 OS=Rhipicephalus zambeziensis PE=3 SV=1	TRUE	-13.0194	1.265e-05	655149	1.03846e+06	662575	1.03147e+06	17846	56114.2	-383313	0.630884	-0.200051	1.58508	0.664554
274	496	tr|A0A1E1X921|A0A1E1X921_9ACAR	N/A	N/A	Galectin OS=Amblyomma aureolatum PE=2 SV=1	TRUE	-13.0071	1.272e-05	287138	368978	287761	370959	5281.1	11422.1	-81839.7	0.778199	-0.108909	1.28502	0.361789
275	74	tr|A0A224YZR0|A0A224YZR0_9ACAR	N/A	N/A	Solute carrier family 25 (Mitochondrial adenine nucleotide translocator) member 4/5/6/31 OS=Rhipicephalus zambeziensis PE=3 SV=1	TRUE	-12.9633	1.2972e-05	935931	1.63178e+06	933410	1.63083e+06	10824.2	106809	-695846	0.573566	-0.241417	1.74348	0.80197
276	770	tr|L7MG30|L7MG30_9ACAR	N/A	N/A	Uncharacterized protein (Fragment) OS=Rhipicephalus pulchellus PE=2 SV=1	TRUE	-12.9618	1.2981e-05	356899	539023	367223	539349	24403.3	13934.9	-182124	0.662123	-0.179062	1.51029	0.59483
277	170	tr|C9W1L7|C9W1L7_RHISA	N/A	N/A	60S ribosomal protein L9 OS=Rhipicephalus sanguineus PE=2 SV=1	TRUE	-12.9321	1.3155e-05	210387	344976	205976	347608	9954.85	18279.8	-134589	0.609861	-0.214769	1.63972	0.713447
278	799	tr|L7LTS4|L7LTS4_9ACAR	N/A	N/A	Putative monotil peptide OS=Rhipicephalus pulchellus PE=2 SV=1	TRUE	-12.9314	1.3159e-05	5210.5	59472.5	5702.88	58538.9	1823.26	8191.81	-54262	0.0876119	-1.05744	11.414	3.51273
279	754	tr|A0A131Y4S1|A0A131Y4S1_IXORI	N/A	N/A	Putative aconitase/aconitase aconitase superfamily OS=Ixodes ricinus PE=2 SV=1	TRUE	12.7576	1.4237e-05	121100	86477.4	120138	87194.9	3385.19	4242.85	34622.9	1.40037	0.146243	0.714097	-0.485808
280	621	tr|A0A224Y5E8|A0A224Y5E8_9ACAR	N/A	N/A	Cubilin OS=Rhipicephalus zambeziensis PE=4 SV=1	TRUE	12.7515	1.4276e-05	152274	119951	152312	120038	1760.59	4754.2	32323.2	1.26947	0.103622	0.78773	-0.344226
281	792	tr|L7MHT4|L7MHT4_9ACAR	N/A	N/A	Putative glycine rich protein (Fragment) OS=Rhipicephalus pulchellus PE=2 SV=1	TRUE	-12.6506	1.4951e-05	21149.6	38575.4	21997.5	38450.2	2630.05	820.049	-17425.7	0.548268	-0.261007	1.82393	0.867048
282	602	tr|L7LRY7|L7LRY7_9ACAR	N/A	N/A	Putative tick salivary serpin OS=Rhipicephalus pulchellus PE=2 SV=1	TRUE	12.549	1.5667e-05	30739.8	14149.1	30303.5	15106.1	1105.54	2401.91	16590.6	2.17255	0.33697	0.460288	-1.11939
283	195	tr|L7LXX6|L7LXX6_9ACAR	N/A	N/A	Putative rna-binding protein hnrnp-m OS=Rhipicephalus pulchellus PE=2 SV=1	TRUE	-12.3794	1.6956e-05	322511	473692	327621	467642	20548.7	13202.9	-151181	0.680845	-0.166952	1.46876	0.554601
284	416	tr|L7M653|L7M653_9ACAR	N/A	N/A	Uncharacterized protein OS=Rhipicephalus pulchellus PE=2 SV=1	TRUE	12.3668	1.7056e-05	570149	409798	568853	413331	9187.35	24250.5	160351	1.39129	0.143419	0.718756	-0.476426
285	543	tr|A0A224YMP8|A0A224YMP8_9ACAR	N/A	N/A	Aldehyde reductase OS=Rhipicephalus zambeziensis PE=4 SV=1	TRUE	12.3624	1.7091e-05	72283	33863.1	72938.1	33487.4	2740.1	5579.04	38420	2.13457	0.32931	0.468479	-1.09394
286	376	tr|L7MFB1|L7MFB1_9ACAR	N/A	N/A	Putative transcription factor l2 (Fragment) OS=Rhipicephalus pulchellus PE=2 SV=1	TRUE	12.3429	1.7249e-05	77678.1	38510.3	78096.3	40184.2	4687.23	4278.98	39167.8	2.01707	0.304722	0.495768	-1.01226
287	700	tr|G3MMF8|G3MMF8_9ACAR	N/A	N/A	Uncharacterized protein OS=Amblyomma maculatum PE=2 SV=1	TRUE	-12.3313	1.7342e-05	139242	206945	139874	209415	2519.29	10687.7	-67702.6	0.672847	-0.172083	1.48622	0.571649
288	649	tr|A0A224YS90|A0A224YS90_9ACAR	N/A	N/A	Ribosomal protein L15 OS=Rhipicephalus zambeziensis PE=3 SV=1	TRUE	-12.2777	1.7786e-05	30980.2	62487.3	32181.9	62821	4172.24	2989	-31507.1	0.495783	-0.304708	2.01701	1.01222
289	865	tr|V5HHG8|V5HHG8_IXORI	N/A	N/A	40S ribosomal protein S30 OS=Ixodes ricinus PE=2 SV=1	TRUE	12.2715	1.7838e-05	57206.7	33792.2	56401.6	33566.7	1908.89	3304.32	23414.5	1.6929	0.228631	0.590703	-0.759495
290	64	tr|A0A224YZ57|A0A224YZ57_9ACAR	N/A	N/A	Galectin OS=Rhipicephalus zambeziensis PE=4 SV=1	TRUE	-12.253	1.7995e-05	87114.5	266288	76679.4	259326	22875.1	18221.8	-179173	0.327144	-0.485261	3.05676	1.612
291	56	tr|L7M2C1|L7M2C1_9ACAR	N/A	N/A	Putative prohibitin OS=Rhipicephalus pulchellus PE=2 SV=1	TRUE	-12.248	1.8038e-05	1.23361e+06	1.59329e+06	1.23212e+06	1.57568e+06	31954.5	49279.4	-359680	0.774252	-0.111117	1.29157	0.369124
292	763	tr|A0A0C9R303|A0A0C9R303_AMBAM	N/A	N/A	Putative hnrnp-l/ptb/hephaestus splicing factor family (Fragment) OS=Amblyomma americanum PE=2 SV=1	TRUE	-12.2241	1.8244e-05	43278.9	79597.1	44138	77700	2456.67	5410.47	-36318.2	0.543725	-0.264621	1.83917	0.879052
293	160	tr|L7MAQ1|L7MAQ1_9ACAR	N/A	N/A	Putative cytochrome b-c1 complex subunit 2 mitochondrial OS=Rhipicephalus pulchellus PE=2 SV=1	TRUE	-12.127	1.9106e-05	306122	627678	303281	627896	20620	48858.4	-321556	0.487705	-0.311843	2.05042	1.03592
294	864	tr|L7M3S2|L7M3S2_9ACAR	N/A	N/A	Putative elongation factor 1 beta OS=Rhipicephalus pulchellus PE=2 SV=1	TRUE	12.1224	1.9148e-05	30935	7228.77	30983.3	7448.13	997.917	3781.69	23706.2	4.27943	0.631385	0.233676	-2.09742
295	420	tr|A0A224YZ73|A0A224YZ73_9ACAR	N/A	N/A	GMP synthase (Glutamine-hydrolysing) OS=Rhipicephalus zambeziensis PE=4 SV=1	TRUE	12.1171	1.9196e-05	80522.6	32848.8	81710.6	34341.7	4553.65	6417.35	47673.7	2.45131	0.389397	0.407946	-1.29355
296	276	tr|C9W1K7|C9W1K7_RHISA	N/A	N/A	Cytochrome c oxidase polypeptide Vb OS=Rhipicephalus sanguineus PE=2 SV=1	TRUE	12.0129	2.0181e-05	325469	237406	322436	234596	9450.14	11209.4	88063	1.37094	0.137018	0.729428	-0.455163
297	780	tr|B7Q730|B7Q730_IXOSC	N/A	N/A	Cuticular protein, putative OS=Ixodes scapularis GN=8036856 PE=4 SV=1	TRUE	-11.9927	2.0379e-05	120109	150917	120441	150949	3900.33	3344.18	-30807.5	0.795865	-0.0991608	1.2565	0.329405
298	363	tr|L7MAP0|L7MAP0_9ACAR	N/A	N/A	Putative aromatic amino acid hydroxylase OS=Rhipicephalus pulchellus PE=2 SV=1	TRUE	-11.9908	2.0398e-05	32011.8	62275.9	31338.9	61499.5	1781.02	4723.24	-30264	0.514033	-0.289009	1.9454	0.960068
299	371	tr|L7MAS7|L7MAS7_9ACAR	N/A	N/A	Tubulin beta chain OS=Rhipicephalus pulchellus PE=2 SV=1	TRUE	-11.9476	2.0828e-05	85382.2	402198	62576.6	402546	49328.5	19475.6	-316816	0.212289	-0.673072	4.71056	2.2359
300	237	tr|A0A224YPN8|A0A224YPN8_9ACAR	N/A	N/A	ATP synthase subunit d, mitochondrial OS=Rhipicephalus zambeziensis PE=3 SV=1	TRUE	-11.8214	2.2149e-05	390891	665485	391079	668800	11069.5	45119.2	-274594	0.587377	-0.231083	1.70248	0.76764
301	662	tr|J9P028|J9P028_CANLF	N/A	N/A	Glutathione peroxidase OS=Canis lupus familiaris GN=GPX3 PE=3 SV=1	TRUE	11.7825	2.2575e-05	128481	30321.3	128734	29470.5	6746.4	15235.1	98160	4.23733	0.627092	0.235998	-2.08316
302	85	tr|A0A1E1X7J7|A0A1E1X7J7_9ACAR	N/A	N/A	Putative muscle m-line assembly protein unc-89 (Fragment) OS=Amblyomma aureolatum PE=2 SV=1	TRUE	11.6892	2.3637e-05	254768	173896	257483	176017	9565.32	9998.69	80872.8	1.46507	0.165857	0.682563	-0.550965
303	214	tr|A0A224Z7S1|A0A224Z7S1_9ACAR	N/A	N/A	Thioredoxin/protein disulfide isomerase OS=Rhipicephalus zambeziensis PE=3 SV=1	TRUE	11.6357	2.4271e-05	122154	73821.7	120527	71793.6	5876.22	5872.58	48332.7	1.65472	0.218725	0.604331	-0.726588
304	440	tr|F2Z4N8|F2Z4N8_CANLF	N/A	N/A	Uncharacterized protein OS=Canis lupus familiaris GN=ACTG2 PE=3 SV=1	TRUE	11.5847	2.4895e-05	1.21077e+06	871404	1.20379e+06	873223	57454.6	11475	339368	1.38945	0.142843	0.719709	-0.474514
305	817	tr|A0A131Z0R7|A0A131Z0R7_RHIAP	N/A	N/A	Glycine rich superfamily member OS=Rhipicephalus appendiculatus PE=4 SV=1	TRUE	-11.5516	2.5309e-05	55014.2	115452	55743	113951	2885.04	10058.4	-60437.9	0.476511	-0.321927	2.09859	1.06942
306	629	tr|R4JQY0|R4JQY0_RHIMP	N/A	N/A	Calreticulin (Fragment) OS=Rhipicephalus microplus PE=2 SV=1	TRUE	11.5012	2.5957e-05	44593.1	18229.5	44243.3	17866.1	1114.45	4446.99	26363.6	2.4462	0.388492	0.408797	-1.29054
307	474	tr|L7MM36|L7MM36_9ACAR	N/A	N/A	Putative short-chain alcohol dehydrogenase/3-hydroxyacyl-coa dehydrogenase (Fragment) OS=Rhipicephalus pulchellus PE=2 SV=1	TRUE	11.4952	2.6035e-05	93184.1	45867	92384.2	46225.7	2035.39	7976.93	47317.1	2.03162	0.307842	0.492219	-1.02263
308	1	tr|A0A131YQK6|A0A131YQK6_RHIAP	N/A	N/A	Titin OS=Rhipicephalus appendiculatus PE=4 SV=1	TRUE	11.4692	2.6377e-05	1.1615e+06	894485	1.15761e+06	906785	15186.2	44015.8	267015	1.29851	0.113446	0.770112	-0.376859
309	340	tr|A0A224YKT1|A0A224YKT1_9ACAR	N/A	N/A	Cytosol aminopeptidase OS=Rhipicephalus zambeziensis PE=3 SV=1	TRUE	11.4376	2.6801e-05	101184	54669.9	101277	55818	5523.11	5970.74	46514	1.85082	0.267363	0.540302	-0.888162
310	102	tr|A0A131YRS4|A0A131YRS4_RHIAP	N/A	N/A	F479582_1 paramyosin OS=Rhipicephalus appendiculatus PE=4 SV=1	TRUE	-11.2751	2.9106e-05	504312	592302	501456	595952	8538.22	13065.5	-87990.7	0.851443	-0.0698445	1.17448	0.232018
311	782	tr|G3MPE6|G3MPE6_9ACAR	N/A	N/A	Cystatin OS=Amblyomma maculatum PE=2 SV=1	TRUE	11.2678	2.9214e-05	14697.9	3386.02	14515.8	3637.01	413.656	1964.75	11311.9	4.34075	0.637565	0.230375	-2.11795
312	29	tr|A0A224YTJ8|A0A224YTJ8_9ACAR	N/A	N/A	Ankyrin OS=Rhipicephalus zambeziensis PE=4 SV=1	TRUE	-11.2668	2.9229e-05	268343	396958	271836	397579	20673.7	9687.3	-128615	0.675998	-0.170055	1.47929	0.564909
313	44	tr|A0A224YZ31|A0A224YZ31_9ACAR	N/A	N/A	Alpha-1,4 glucan phosphorylase OS=Rhipicephalus zambeziensis PE=3 SV=1	TRUE	-11.2434	2.9582e-05	356170	468642	354874	466609	9861.43	17407.6	-112472	0.760005	-0.119184	1.31578	0.39592
314	270	tr|A0A224Z4R6|A0A224Z4R6_9ACAR	N/A	N/A	NADH dehydrogenase (Ubiquinone) 1 beta subcomplex subunit 6 OS=Rhipicephalus zambeziensis PE=4 SV=1	TRUE	-11.2348	2.9713e-05	153967	245298	153782	243417	10920.5	12045.1	-91330.9	0.627673	-0.202266	1.59319	0.671915
315	824	tr|L7M8V5|L7M8V5_9ACAR	N/A	N/A	Isocitrate dehydrogenase [NADP] OS=Rhipicephalus pulchellus PE=2 SV=1	TRUE	11.1835	3.0506e-05	88167.2	16613.2	87205.5	13303.9	10187.2	7743.9	71554	5.30706	0.724854	0.188428	-2.40791
316	171	tr|A0A224YWJ9|A0A224YWJ9_9ACAR	N/A	N/A	Acetyltransferase component of pyruvate dehydrogenase complex OS=Rhipicephalus zambeziensis PE=3 SV=1	TRUE	-11.1799	3.0563e-05	273485	391578	276980	396425	14388.4	15468.6	-118093	0.698418	-0.155885	1.43181	0.517837
317	655	tr|A0A131XNW8|A0A131XNW8_9ACAR	N/A	N/A	Putative thimet oligopeptidase (Fragment) OS=Hyalomma excavatum PE=2 SV=1	TRUE	11.1237	3.1463e-05	40566.6	23748.7	40206.5	23861.6	2884.1	908.454	16817.9	1.70816	0.232528	0.585426	-0.772442
318	736	tr|A0A131Z012|A0A131Z012_RHIAP	N/A	N/A	Sepiapterin reductase OS=Rhipicephalus appendiculatus PE=4 SV=1	TRUE	11.1023	3.1813e-05	18946.3	8562.8	19267.3	8872.57	788.855	1696.02	10383.5	2.21262	0.344908	0.451952	-1.14576
319	565	tr|L7MJ32|L7MJ32_9ACAR	N/A	N/A	Putative ribosomal protein l17 (Fragment) OS=Rhipicephalus pulchellus PE=2 SV=1	TRUE	-11.1005	3.1843e-05	185578	218472	185097	219609	4270.86	4109.12	-32894.3	0.849435	-0.0708701	1.17725	0.235425
320	419	tr|B7SP19|B7SP19_DERVA	N/A	N/A	Quinoid dihydropteridine reductase OS=Dermacentor variabilis PE=2 SV=1	TRUE	11.0888	3.2038e-05	286892	155258	288793	161230	8401.94	22205.4	131633	1.84783	0.266663	0.541174	-0.885835
321	455	tr|A0A224YNS0|A0A224YNS0_9ACAR	N/A	N/A	Serine protease inhibitor OS=Rhipicephalus zambeziensis PE=3 SV=1	TRUE	11.0145	3.33e-05	284898	110592	277181	110700	31591.1	1932.4	174306	2.57612	0.410966	0.388181	-1.3652
322	427	tr|A0A224YIC5|A0A224YIC5_9ACAR	N/A	N/A	4-hydroxyphenylpyruvate dioxygenase OS=Rhipicephalus zambeziensis PE=3 SV=1	TRUE	11.0069	3.3434e-05	127719	103882	128663	103058	2647.61	3427.89	23837.1	1.22946	0.0897152	0.813364	-0.298027
323	92	tr|L7M706|L7M706_9ACAR	N/A	N/A	Putative oligomycin sensitivity-conferring protein OS=Rhipicephalus pulchellus PE=2 SV=1	TRUE	-10.9978	3.3593e-05	1.41026e+06	1.81239e+06	1.39205e+06	1.79589e+06	43128.4	59056.2	-402122	0.778125	-0.10895	1.28514	0.361926
324	143	tr|A0A224YR66|A0A224YR66_9ACAR	N/A	N/A	Cytosolic ca2+ dependent cysteine protease OS=Rhipicephalus zambeziensis PE=3 SV=1	TRUE	10.9243	3.4913e-05	384154	271066	383788	269239	3901.74	20333	113088	1.4172	0.151431	0.705617	-0.503043
325	585	tr|A0A224YIR8|A0A224YIR8_9ACAR	N/A	N/A	Uncharacterized protein OS=Rhipicephalus zambeziensis PE=4 SV=1	TRUE	10.8284	3.6728e-05	53715.3	27381.7	54620.5	26301.9	2705.69	4041.77	26333.6	1.96172	0.292637	0.509756	-0.97212
326	859	tr|A0A023GM04|A0A023GM04_9ACAR	N/A	N/A	Putative calpain-a OS=Amblyomma triste PE=2 SV=1	TRUE	10.7639	3.8009e-05	29571.2	6010.19	29525.5	5346.41	2042.94	3871.86	23561	4.92018	0.691981	0.203245	-2.29871
327	286	tr|L7LY48|L7LY48_9ACAR	N/A	N/A	Putative transcriptional regulator dj-1 OS=Rhipicephalus pulchellus PE=2 SV=1	TRUE	-10.7353	3.8595e-05	93073.9	170323	95061.6	169240	4555.45	13651.7	-77249.2	0.546455	-0.262446	1.82998	0.871826
328	841	tr|A0A224Y7Y3|A0A224Y7Y3_9ACAR	N/A	N/A	Uncharacterized protein OS=Rhipicephalus zambeziensis PE=4 SV=1	TRUE	-10.7234	3.884e-05	3483.25	21789.4	3284.12	21876.2	2381.69	2446.34	-18306.2	0.15986	-0.796261	6.25549	2.64512
329	134	tr|L7M721|L7M721_9ACAR	N/A	N/A	Putative lipoprotein amino terminal region OS=Rhipicephalus pulchellus PE=2 SV=1	TRUE	-10.6512	4.0375e-05	236327	379202	235172	383399	5729.99	26208.9	-142875	0.623221	-0.205358	1.60457	0.682184
330	426	tr|G3MIA4|G3MIA4_9ACAR	N/A	N/A	Uncharacterized protein (Fragment) OS=Amblyomma maculatum PE=2 SV=1	TRUE	10.5892	4.1751e-05	192812	56810.3	204715	55524.8	24388.8	8062.35	136001	3.39396	0.530707	0.294641	-1.76297
331	537	tr|L7MBH0|L7MBH0_9ACAR	N/A	N/A	Putative secreted peptide OS=Rhipicephalus pulchellus PE=2 SV=1	TRUE	10.5249	4.3235e-05	87033.3	24762.3	87725.5	24653.8	2461.93	11574.2	62271	3.51475	0.545894	0.284516	-1.81342
332	622	tr|A0A131XP84|A0A131XP84_9ACAR	N/A	N/A	Aconitate hydratase, mitochondrial OS=Hyalomma excavatum PE=2 SV=1	TRUE	-10.4897	4.4072e-05	131576	213331	130521	215251	6094.35	14346.9	-81754.6	0.616771	-0.209876	1.62135	0.697193
333	720	tr|A0A1E1WZ73|A0A1E1WZ73_9ACAR	N/A	N/A	Putative atp synthase d chain (Fragment) OS=Amblyomma aureolatum PE=2 SV=1	TRUE	10.4465	4.5126e-05	109337	40353.4	107572	40555.5	13053.6	2006.83	68983.2	2.70948	0.432886	0.369075	-1.43801
334	192	tr|A0A224YSG5|A0A224YSG5_9ACAR	N/A	N/A	Large subunit ribosomal protein L5e OS=Rhipicephalus zambeziensis PE=3 SV=1	TRUE	-10.3763	4.6901e-05	275658	425318	274525	428059	7956.39	27727.5	-149660	0.648122	-0.188343	1.54292	0.625663
335	156	tr|A0A131ZAT8|A0A131ZAT8_RHIAP	N/A	N/A	Laminin, gamma 1 (Fragment) OS=Rhipicephalus appendiculatus PE=4 SV=1	TRUE	10.36	4.7325e-05	74976.1	26489.2	75214.7	25669.9	7603.3	5459.56	48486.9	2.83044	0.451854	0.353302	-1.50103
336	591	tr|L7MGQ7|L7MGQ7_9ACAR	N/A	N/A	Putative ribose 5-phosphate isomerase (Fragment) OS=Rhipicephalus pulchellus PE=2 SV=1	TRUE	10.3282	4.8166e-05	28505.1	10328.4	27911.8	10048.1	2352.97	2617.8	18176.8	2.75989	0.440892	0.362333	-1.46461
337	400	tr|A0A131XJZ4|A0A131XJZ4_9ACAR	N/A	N/A	Cytochrome b-c1 complex subunit 7 OS=Hyalomma excavatum PE=2 SV=1	TRUE	-10.3233	4.8296e-05	96455.1	118146	97395.3	118129	3236.96	2679.73	-21690.4	0.816409	-0.0880922	1.22488	0.292636
338	144	tr|A0A224YQ83|A0A224YQ83_9ACAR	N/A	N/A	40s ribosomal protein s3 OS=Rhipicephalus zambeziensis PE=4 SV=1	TRUE	-10.3181	4.8434e-05	615260	819826	614197	831546	12297.9	37696.4	-204566	0.750476	-0.124663	1.33249	0.414122
339	390	tr|A0A224YVV2|A0A224YVV2_9ACAR	N/A	N/A	Phosphoglucomutase OS=Rhipicephalus zambeziensis PE=3 SV=1	TRUE	10.2694	4.9762e-05	88499.1	39660.9	88111	39361.4	8310.86	4625.54	48838.2	2.2314	0.348577	0.44815	-1.15795
340	855	tr|A0A224YCP5|A0A224YCP5_9ACAR	N/A	N/A	Glycine rich superfamily member OS=Rhipicephalus zambeziensis PE=4 SV=1	TRUE	10.2626	4.9952e-05	16456	5982.36	16405.3	5183.43	990.79	1784.53	10473.6	2.75075	0.439451	0.363537	-1.45983
341	676	tr|F1PW65|F1PW65_CANLF	N/A	N/A	Fibrinogen beta chain OS=Canis lupus familiaris GN=FGB PE=4 SV=2	TRUE	10.261	4.9997e-05	38015.6	6674.23	37370.6	4828.01	2385.17	5623.95	31341.3	5.69587	0.75556	0.175566	-2.50992
342	288	tr|F1PDJ5|F1PDJ5_CANLF	N/A	N/A	Apolipoprotein A-I OS=Canis lupus familiaris GN=APOA1 PE=3 SV=1	TRUE	10.2018	5.1677e-05	510469	77674.1	511536	40385.8	3215.2	84785.8	432795	6.57193	0.817693	0.152162	-2.71632
343	190	tr|L7M3S8|L7M3S8_9ACAR	N/A	N/A	Putative ribosomal protein s16 OS=Rhipicephalus pulchellus PE=2 SV=1	TRUE	-10.1858	5.2142e-05	886195	1.10051e+06	885230	1.09734e+06	16106.7	38875.9	-214312	0.805261	-0.0940635	1.24183	0.312472
344	3	tr|A0A131Z9Z9|A0A131Z9Z9_RHIAP	N/A	N/A	Heparan sulfate proteoglycan 2 (Fragment) OS=Rhipicephalus appendiculatus PE=4 SV=1	TRUE	-10.1769	5.2403e-05	647376	755963	647327	762724	14329.1	15813.4	-108587	0.856359	-0.0673439	1.16773	0.223712
345	306	tr|A0A224YWL8|A0A224YWL8_9ACAR	N/A	N/A	Fructose-1,6-bisphosphatase (Fragment) OS=Rhipicephalus zambeziensis PE=3 SV=1	TRUE	10.1629	5.2816e-05	223461	138273	223553	141911	8687.3	14337.9	85187.6	1.61608	0.208463	0.61878	-0.6925
346	28	tr|L7MMT8|L7MMT8_9ACAR	N/A	N/A	Putative tick thioester protein (Fragment) OS=Rhipicephalus pulchellus PE=2 SV=1	TRUE	10.1422	5.3438e-05	142043	60943.5	140978	56066.9	5413.87	15048.4	81099.7	2.33074	0.367493	0.429049	-1.22079
347	616	tr|C9W1U6|C9W1U6_RHISA	N/A	N/A	NADH ubiquinone oxidoreductase ashi subunit (Fragment) OS=Rhipicephalus sanguineus PE=2 SV=1	TRUE	-10.0448	5.6462e-05	16061.5	40250.5	15710.3	39282.7	1445.57	4594.17	-24189.1	0.399038	-0.398986	2.50603	1.3254
348	380	tr|Q86G63|Q86G63_DERVA	N/A	N/A	40S ribosomal protein S11 OS=Dermacentor variabilis PE=2 SV=1	TRUE	-10.0128	5.75e-05	239878	345272	242844	345823	10855.8	18037	-105394	0.694752	-0.15817	1.43936	0.525431
349	132	tr|A0A224Z4Q3|A0A224Z4Q3_9ACAR	N/A	N/A	40S ribosomal protein SA OS=Rhipicephalus zambeziensis PE=3 SV=1	TRUE	-9.95444	5.9448e-05	523428	800359	526319	807963	7857.21	55082.1	-276931	0.653992	-0.184428	1.52907	0.612656
350	50	tr|A0A131YQ75|A0A131YQ75_RHIAP	N/A	N/A	Transglutaminase/protease like proteins OS=Rhipicephalus appendiculatus PE=4 SV=1	TRUE	-9.88367	6.1914e-05	101416	118291	101117	117841	1502.16	3066.44	-16874.4	0.857348	-0.066843	1.16639	0.222047
351	813	tr|A0A224YSS4|A0A224YSS4_9ACAR	N/A	N/A	Erythrocyte membrane protein 1 OS=Rhipicephalus zambeziensis PE=4 SV=1	TRUE	-9.87635	6.2176e-05	55149	77863.2	55074.4	79424.8	2222.82	4026.97	-22714.2	0.708281	-0.149795	1.41187	0.497607
352	174	tr|A0A131YR14|A0A131YR14_RHIAP	N/A	N/A	Splicing factor, proline-and glutamine-rich OS=Rhipicephalus appendiculatus PE=4 SV=1	TRUE	-9.87122	6.236e-05	107611	146550	106657	143406	2850.3	7356.45	-38938.7	0.734298	-0.134128	1.36185	0.445563
353	461	tr|L7MF58|L7MF58_9ACAR	N/A	N/A	Putative emp24/gp25l/p24 family of membrane trafficking (Fragment) OS=Rhipicephalus pulchellus PE=2 SV=1	TRUE	-9.83548	6.3661e-05	34909.6	67573.1	35174.1	68998.3	4879.78	4505.93	-32663.5	0.51662	-0.286828	1.93566	0.952824
354	433	tr|L7MBX9|L7MBX9_9ACAR	N/A	N/A	Putative ml domain protein OS=Rhipicephalus pulchellus PE=2 SV=1	TRUE	9.79278	6.5257e-05	175503	146162	175187	145446	4330.17	4142.25	29341	1.20074	0.0794502	0.832818	-0.263928
355	397	tr|A0A131XIF4|A0A131XIF4_9ACAR	N/A	N/A	Putative calpain-a OS=Hyalomma excavatum PE=2 SV=1	TRUE	9.79252	6.5267e-05	236496	197827	237169	198618	2542.93	7476.89	38668.2	1.19546	0.0775366	0.836495	-0.257571
356	853	tr|Q4R0Q2|Q4R0Q2_9ACAR	N/A	N/A	cAMP-dependent protein kinase catalytic subunit OS=Amblyomma hebraeum GN=PKA-C PE=2 SV=1	TRUE	-9.72731	6.7796e-05	25324.2	48142.2	26545.1	48371.8	4359.34	1733.97	-22818	0.526029	-0.27899	1.90104	0.926785
357	484	tr|A0A224Y9K2|A0A224Y9K2_9ACAR	N/A	N/A	Glycine rich superfamily member OS=Rhipicephalus zambeziensis PE=4 SV=1	TRUE	9.71486	6.8291e-05	65463.5	19001.1	67656.8	19492.9	7987.52	5262.43	46462.4	3.44526	0.537221	0.290254	-1.78461
358	271	tr|A0A224YCV5|A0A224YCV5_9ACAR	N/A	N/A	Fatty acid-binding protein 7 OS=Rhipicephalus zambeziensis PE=3 SV=1	TRUE	9.69927	6.8918e-05	365725	166680	374566	166430	33886.3	23157.5	199045	2.19417	0.341271	0.455753	-1.13368
359	296	tr|A0A131Z7V1|A0A131Z7V1_RHIAP	N/A	N/A	Ribosomal protein OS=Rhipicephalus appendiculatus PE=3 SV=1	TRUE	-9.64703	7.1066e-05	267517	369977	263605	365442	13398.6	16482.9	-102459	0.723065	-0.140823	1.383	0.467802
360	597	tr|L7M803|L7M803_9ACAR	N/A	N/A	Putative 4-aminobutyrate aminotransferase OS=Rhipicephalus pulchellus PE=2 SV=1	TRUE	-9.64143	7.1301e-05	17098.7	43962.7	16973.3	45113	1326.02	5412.57	-26864.1	0.388935	-0.410123	2.57112	1.3624
361	646	tr|A0A023GKA4|A0A023GKA4_9ACAR	N/A	N/A	Putative ubiquinol cytochrome c reductase subunit qcr2 OS=Amblyomma triste PE=2 SV=1	TRUE	-9.64	7.1361e-05	17443.7	78770.9	21790.1	78207.1	11176.7	6080.18	-61327.2	0.221448	-0.654727	4.51572	2.17496
362	256	tr|L7M9V8|L7M9V8_9ACAR	N/A	N/A	Putative proline and glutamine-rich splicing factor sfpq OS=Rhipicephalus pulchellus PE=2 SV=1	TRUE	-9.63888	7.1408e-05	133287	158162	134418	159202	3888.88	3393.43	-24874.5	0.842728	-0.0743127	1.18662	0.246862
363	408	tr|A0A131Z6W5|A0A131Z6W5_RHIAP	N/A	N/A	NADH dehydrogenase (Ubiquinone) 1 alpha subcomplex subunit 6 OS=Rhipicephalus appendiculatus PE=3 SV=1	TRUE	-9.61851	7.2271e-05	103825	137935	104452	137061	5151.67	4874.99	-34110.2	0.752708	-0.123373	1.32854	0.409838
364	650	tr|Q4U334|Q4U334_DERVA	N/A	N/A	40S ribosomal protein S24 OS=Dermacentor variabilis PE=2 SV=1	TRUE	-9.59569	7.3253e-05	54754.4	96720.9	55039.7	99062	2073.96	8497.53	-41966.5	0.566107	-0.247102	1.76645	0.820854
365	204	tr|E2R8Z5|E2R8Z5_CANLF	N/A	N/A	Keratin 5 OS=Canis lupus familiaris GN=KRT5 PE=3 SV=2	TRUE	-9.59332	7.3355e-05	44633.2	84809	43709.3	85484.1	3709.28	7509.68	-40175.9	0.526278	-0.278785	1.90014	0.926102
366	98	tr|A0A224Z8V8|A0A224Z8V8_9ACAR	N/A	N/A	SND1 nuclease domain-containing protein 1 OS=Rhipicephalus zambeziensis PE=4 SV=1	TRUE	9.5827	7.3818e-05	430767	310075	426057	310078	12890.6	21641.2	120692	1.38923	0.142775	0.719821	-0.47429
367	326	tr|L7MDL8|L7MDL8_9ACAR	N/A	N/A	Uncharacterized protein (Fragment) OS=Rhipicephalus pulchellus PE=2 SV=1	TRUE	9.552	7.5175e-05	186021	107405	187308	110071	8513.32	14088.1	78615.8	1.73196	0.238537	0.577382	-0.792402
368	463	tr|V5I0X4|V5I0X4_IXORI	N/A	N/A	Putative 60s ribosomal protein l23 apis mellifera OS=Ixodes ricinus PE=2 SV=1	TRUE	-9.54648	7.5422e-05	248261	330689	247660	323316	1982.08	17154.7	-82428.2	0.750738	-0.124512	1.33202	0.413618
369	447	tr|A0A224YMH7|A0A224YMH7_9ACAR	N/A	N/A	Adenylate kinase OS=Rhipicephalus zambeziensis PE=3 SV=1	TRUE	9.47774	7.8578e-05	123261	78066.7	124187	80678.6	5097.78	8060.22	45194.7	1.57892	0.198361	0.633343	-0.658941
370	402	tr|L7LXM2|L7LXM2_9ACAR	N/A	N/A	Uncharacterized protein OS=Rhipicephalus pulchellus PE=2 SV=1	TRUE	-9.39543	8.2561e-05	87491.4	111780	87387.7	113334	3168.21	4086.01	-24289	0.782708	-0.1064	1.27762	0.353455
371	476	tr|A0A224YSJ3|A0A224YSJ3_9ACAR	N/A	N/A	Leucine-rich PPR motif-containing protein mitochondrial OS=Rhipicephalus zambeziensis PE=4 SV=1	TRUE	9.3799	8.3338e-05	43497.9	28654.9	42720.6	27750	2047.62	2413.22	14843.1	1.51799	0.18127	0.658764	-0.602167
372	66	tr|A0A224YRR9|A0A224YRR9_9ACAR	N/A	N/A	Insulin-like growth factor 2 mRNA-binding protein 1 OS=Rhipicephalus zambeziensis PE=4 SV=1	TRUE	-9.34788	8.4968e-05	463114	558757	458574	561561	13818.1	15092.7	-95642.5	0.82883	-0.0815346	1.20652	0.270852
373	805	tr|B7PEW1|B7PEW1_IXOSC	N/A	N/A	Cytochrome b-c1 complex subunit 6 OS=Ixodes scapularis GN=8050450 PE=3 SV=1	TRUE	-9.31668	8.6591e-05	2322.78	41283.9	2761.38	42319.6	1361.7	8252.14	-38961.1	0.0562636	-1.24977	17.7735	4.15165
374	90	tr|A0A224Z386|A0A224Z386_9ACAR	N/A	N/A	Lamin B OS=Rhipicephalus zambeziensis PE=3 SV=1	TRUE	9.2615	8.9551e-05	508665	348536	511129	346869	16109.4	30597.9	160129	1.45943	0.164184	0.685197	-0.545409
375	411	tr|A0A224YMT2|A0A224YMT2_9ACAR	N/A	N/A	F-type H+-transporting ATPase subunit f OS=Rhipicephalus zambeziensis PE=4 SV=1	TRUE	9.22846	9.1379e-05	419990	295214	420185	302624	6668.07	26206.6	124776	1.42266	0.153102	0.702907	-0.508595
376	291	tr|L7ME31|L7ME31_9ACAR	N/A	N/A	Putative laminin a (Fragment) OS=Rhipicephalus pulchellus PE=2 SV=1	TRUE	9.20978	9.2432e-05	226715	161159	225492	160192	7380.79	12173.2	65555.2	1.40677	0.148224	0.710847	-0.492389
377	316	tr|J9NVC6|J9NVC6_CANLF	N/A	N/A	Immunoglobulin heavy constant mu OS=Canis lupus familiaris GN=IGHM PE=4 SV=1	TRUE	9.18802	9.3676e-05	175727	37384.3	174642	27900.8	5109.26	29677.2	138343	4.70056	0.67215	0.212741	-2.23283
378	636	tr|A0A224YVX6|A0A224YVX6_9ACAR	N/A	N/A	Trifunctional purine biosynthetic protein adenosine-3 OS=Rhipicephalus zambeziensis PE=3 SV=1	TRUE	9.17389	9.4494e-05	70344.1	36074.5	69026.8	35205.8	2852.15	6905.28	34269.6	1.94997	0.290028	0.512829	-0.963451
379	442	tr|A0A224YSE4|A0A224YSE4_9ACAR	N/A	N/A	ATP-dependent 6-phosphofructokinase OS=Rhipicephalus zambeziensis PE=3 SV=1	TRUE	9.17328	9.453e-05	62149.9	25231.6	61764.3	22647.3	2691.92	7585.61	36918.3	2.46318	0.391496	0.405979	-1.30052
380	502	tr|L7M6K1|L7M6K1_9ACAR	N/A	N/A	Uncharacterized protein OS=Rhipicephalus pulchellus PE=2 SV=1	TRUE	9.06235	0.0001	18406.1	10023.7	18148.2	10548.8	852.894	1641.59	8382.38	1.83626	0.263934	0.544586	-0.876769
381	518	tr|A0A131Z2K7|A0A131Z2K7_RHIAP	N/A	N/A	Lipocalin OS=Rhipicephalus appendiculatus PE=4 SV=1	TRUE	-9.04701	0.0001	40815.4	60059.7	41635.1	60344.4	2427.23	3493.9	-19244.2	0.679582	-0.167758	1.47149	0.557281
382	157	tr|L7M8R8|L7M8R8_9ACAR	N/A	N/A	Adenosylhomocysteinase OS=Rhipicephalus pulchellus PE=2 SV=1	TRUE	8.91783	0.00011	321808	171329	320548	157339	4263.44	33477.5	150479	1.87831	0.273766	0.532395	-0.909432
383	281	tr|A0A023FJC0|A0A023FJC0_9ACAR	N/A	N/A	Putative fibrillarin (Fragment) OS=Amblyomma cajennense PE=2 SV=1	TRUE	-8.99021	0.00011	163660	262617	165292	265078	4992.33	21440.9	-98957.2	0.623189	-0.20538	1.60465	0.682259
384	549	tr|A0A131XG98|A0A131XG98_9ACAR	N/A	N/A	Putative zinc-binding oxidoreductase OS=Hyalomma excavatum PE=2 SV=1	TRUE	-8.97872	0.00011	72088	101275	71974.9	100874	3786.38	5284.96	-29186.9	0.711805	-0.147639	1.40488	0.490445
385	728	tr|F1PW98|F1PW98_CANLF	N/A	N/A	Uncharacterized protein OS=Canis lupus familiaris GN=KRT8 PE=3 SV=2	TRUE	-8.95024	0.00011	8984.28	51353	8960.83	52794.8	2574.56	9110.84	-42368.7	0.174951	-0.757083	5.71588	2.51497
386	807	tr|B7P6R8|B7P6R8_IXOSC	N/A	N/A	Secreted inorganic pyrophosphatase, putative (Fragment) OS=Ixodes scapularis GN=8025457 PE=4 SV=1	TRUE	8.93334	0.00011	57587	27248.2	56811.9	27436.1	4284.06	5270.83	30338.8	2.11342	0.324986	0.473166	-1.07958
387	111	tr|A0A224Z3B4|A0A224Z3B4_9ACAR	N/A	N/A	Malic enzyme OS=Rhipicephalus zambeziensis PE=3 SV=1	TRUE	8.85763	0.00012	238054	157995	237710	160929	7275.9	16548	80059.2	1.50672	0.178032	0.663694	-0.591411
388	238	tr|A0A131YYZ5|A0A131YYZ5_RHIAP	N/A	N/A	Adenylyl cyclase-associated protein OS=Rhipicephalus appendiculatus PE=3 SV=1	TRUE	8.82465	0.00012	284347	188429	282068	189995	9677.74	19465.5	95917.7	1.50904	0.1787	0.662674	-0.593629
389	347	tr|L7M3K2|L7M3K2_9ACAR	N/A	N/A	60S ribosomal protein L13 OS=Rhipicephalus pulchellus PE=2 SV=1	TRUE	-8.73572	0.00012	231398	287222	235335	287633	12409.8	3056.45	-55824	0.805642	-0.0938581	1.24125	0.31179
390	471	tr|L7M6N0|L7M6N0_9ACAR	N/A	N/A	Putative eukaryotic translation initiation factor OS=Rhipicephalus pulchellus PE=2 SV=1	TRUE	8.78955	0.00012	85427.7	50483.2	86119.7	51182.3	6307.44	4841.56	34944.5	1.6922	0.228452	0.590946	-0.758901
391	266	tr|A0A131Z5W2|A0A131Z5W2_RHIAP	N/A	N/A	NADH dehydrogenase (Ubiquinone) 1 alpha subcomplex subunit 9 OS=Rhipicephalus appendiculatus PE=4 SV=1	TRUE	-8.62644	0.00013	201681	309361	206353	309077	9548.27	23066.8	-107679	0.65193	-0.185799	1.53391	0.617211
392	482	tr|L7LVH9|L7LVH9_9ACAR	N/A	N/A	Histone H3 OS=Rhipicephalus pulchellus PE=2 SV=1	TRUE	-8.71489	0.00013	2532.06	20992.1	2924.77	22608.2	1371.42	4008.31	-18460	0.12062	-0.918581	8.29051	3.05146
393	480	tr|A0A131X8H2|A0A131X8H2_9ACAR	N/A	N/A	Peptidylprolyl isomerase OS=Hyalomma excavatum PE=2 SV=1	TRUE	8.60523	0.00014	79321.5	36410.5	79977	34586	8328.41	5486.61	42911	2.17853	0.338164	0.459024	-1.12336
394	600	tr|A0A224YNG9|A0A224YNG9_9ACAR	N/A	N/A	Glucose-6-phosphate isomerase OS=Rhipicephalus zambeziensis PE=3 SV=1	TRUE	8.5541	0.00014	57785.5	35492.1	56442.2	35343.1	3854.52	3508.71	22293.4	1.62812	0.211687	0.614205	-0.703208
395	87	tr|A0A224YC84|A0A224YC84_9ACAR	N/A	N/A	Adducin OS=Rhipicephalus zambeziensis PE=4 SV=1	TRUE	-8.4567	0.00015	472737	673488	464670	683188	30350.6	36509.4	-200751	0.701924	-0.15371	1.42466	0.510614
396	339	tr|A0A224YTK8|A0A224YTK8_9ACAR	N/A	N/A	Mitochondrial 2-oxoglutarate/malate carrier protein OS=Rhipicephalus zambeziensis PE=3 SV=1	TRUE	-8.4008	0.00015	134262	167560	135293	165739	3936.4	6881.07	-33298.4	0.801275	-0.0962185	1.24801	0.319631
397	359	tr|C9W1F7|C9W1F7_RHISA	N/A	N/A	F1F0-type ATP synthase subunit G OS=Rhipicephalus sanguineus PE=2 SV=1	TRUE	-8.37735	0.00016	324772	358721	323913	360121	3278.59	7412.17	-33948.8	0.905362	-0.0431779	1.10453	0.143434
398	373	tr|A0A131YR43|A0A131YR43_RHIAP	N/A	N/A	Lectin, mannose-binding 1 OS=Rhipicephalus appendiculatus PE=4 SV=1	TRUE	-8.34597	0.00016	151973	200269	153122	196778	4195.16	10786.3	-48295.6	0.758846	-0.119846	1.31779	0.39812
399	432	tr|L7M796|L7M796_9ACAR	N/A	N/A	Putative aldehyde dehydrogenase OS=Rhipicephalus pulchellus PE=2 SV=1	TRUE	8.34492	0.00016	30719	12812.7	31510.1	12969.1	3463.94	2533.49	17906.3	2.39754	0.379766	0.417094	-1.26156
400	776	tr|A0A1E1XEH7|A0A1E1XEH7_9ACAR	N/A	N/A	Glycerol-3-phosphate dehydrogenase [NAD(+)] OS=Amblyomma aureolatum PE=2 SV=1	TRUE	8.32844	0.00016	40006	23020.1	39879.3	22880.4	2028.5	3538.87	16985.9	1.73787	0.240019	0.575415	-0.797324
401	7	tr|Q6X4V4|Q6X4V4_RHIMP	N/A	N/A	Actin OS=Rhipicephalus microplus PE=2 SV=1	TRUE	-8.27574	0.00017	26310.7	37633.5	26339.1	38201	1892.37	1976.55	-11322.8	0.699129	-0.155443	1.43035	0.516369
402	15	tr|A0A131YYS7|A0A131YYS7_RHIAP	N/A	N/A	ATP synthase subunit beta OS=Rhipicephalus appendiculatus PE=3 SV=1	TRUE	-8.25027	0.00017	2.4274e+06	3.02215e+06	2.45158e+06	3.02413e+06	109445	93857.9	-594756	0.803201	-0.0951757	1.24502	0.316167
403	45	tr|A0A131Z645|A0A131Z645_RHIAP	N/A	N/A	Cubilin (Fragment) OS=Rhipicephalus appendiculatus PE=4 SV=1	TRUE	8.26162	0.00017	90609.4	62026.4	90370.8	62354.7	5908.96	3600.42	28582.9	1.46082	0.164596	0.684548	-0.546777
404	320	tr|L7M7H8|L7M7H8_9ACAR	N/A	N/A	Putative glyoxalase OS=Rhipicephalus pulchellus PE=2 SV=1	TRUE	8.25542	0.00017	165793	119837	164355	117305	6177.98	9262.13	45955.8	1.38349	0.140975	0.722812	-0.468309
405	375	tr|A0A131XE97|A0A131XE97_9ACAR	N/A	N/A	Glycerol-3-phosphate dehydrogenase [NAD(+)] OS=Hyalomma excavatum PE=2 SV=1	TRUE	8.30671	0.00017	83122.5	59207.6	82262	59339.4	3584	4506.58	23914.9	1.40392	0.147341	0.712293	-0.489457
406	385	tr|A0A224YNT5|A0A224YNT5_9ACAR	N/A	N/A	Glyoxylate/hydroxypyruvate reductase OS=Rhipicephalus zambeziensis PE=3 SV=1	TRUE	8.26424	0.00017	103842	55393.5	105964	57932.2	5067.32	10573.4	48448.9	1.87463	0.272916	0.533438	-0.906607
407	794	tr|L7M4C6|L7M4C6_9ACAR	N/A	N/A	Putative ca2+-binding protein OS=Rhipicephalus pulchellus PE=2 SV=1	TRUE	8.27836	0.00017	22458.7	12504.1	23070.3	12079.6	1498.05	1881.42	9954.65	1.79611	0.254333	0.556758	-0.844878
408	224	tr|L7M7P8|L7M7P8_9ACAR	N/A	N/A	Proteasome subunit alpha type OS=Rhipicephalus pulchellus PE=2 SV=1	TRUE	8.1563	0.00018	152956	88389.2	153101	94703.6	6352.49	14502	64566.7	1.73048	0.238167	0.577874	-0.791174
409	421	tr|L7MAD1|L7MAD1_9ACAR	N/A	N/A	Putative pppde peptidase domain protein OS=Rhipicephalus pulchellus PE=2 SV=1	TRUE	8.17215	0.00018	125622	71375.6	124857	72630.6	4615.33	12447.8	54246	1.76001	0.245515	0.568179	-0.815582
410	441	tr|A0A224Z1V2|A0A224Z1V2_9ACAR	N/A	N/A	Uncharacterized protein OS=Rhipicephalus zambeziensis PE=4 SV=1	TRUE	8.2021	0.00018	63530.5	29633.3	61337.9	29769.4	6666.13	4886.83	33897.2	2.14389	0.331202	0.466442	-1.10023
411	478	tr|A0A224YNP1|A0A224YNP1_9ACAR	N/A	N/A	Glycine rich cell wall structural protein OS=Rhipicephalus zambeziensis PE=4 SV=1	TRUE	8.17778	0.00018	185772	144571	185719	146316	6964.72	7281.98	41201.5	1.28499	0.1089	0.778216	-0.361758
412	555	tr|A0A023FWK0|A0A023FWK0_9ACAR	N/A	N/A	Putative ribosomal protein l24 OS=Amblyomma parvum PE=2 SV=1	TRUE	-8.2065	0.00018	159875	217965	158475	219972	8205.82	11536.3	-58089.9	0.73349	-0.134606	1.36335	0.447151
413	211	tr|A0A0K8RPZ5|A0A0K8RPZ5_IXORI	N/A	N/A	40S ribosomal protein S8 (Fragment) OS=Ixodes ricinus PE=2 SV=1	TRUE	-8.09934	0.00019	493842	633907	493788	636382	13295	31929.4	-140065	0.779045	-0.108438	1.28362	0.360222
414	152	tr|A0A224YPY7|A0A224YPY7_9ACAR	N/A	N/A	2-oxoglutarate dehydrogenase E2 component (Dihydrolipoamide succinyltransferase) OS=Rhipicephalus zambeziensis PE=4 SV=1	TRUE	-8.05727	0.0002	57712.7	158149	58866.8	169180	6592.43	24043.2	-100436	0.364926	-0.437795	2.74028	1.45432
415	165	tr|A0A224YJT0|A0A224YJT0_9ACAR	N/A	N/A	Chorion peroxidase like protein OS=Rhipicephalus zambeziensis PE=4 SV=1	TRUE	8.0454	0.0002	327814	220028	327559	226574	7465.4	25733.4	107786	1.48987	0.173149	0.671199	-0.575188
416	557	tr|A0A224Z5E7|A0A224Z5E7_9ACAR	N/A	N/A	Pyruvate dehydrogenase E1 component subunit alpha OS=Rhipicephalus zambeziensis PE=4 SV=1	TRUE	-7.9941	0.0002	40825.9	65968.3	39810.4	64168	4176.64	4703.47	-25142.4	0.618872	-0.208399	1.61584	0.692287
417	854	tr|A0A131XP13|A0A131XP13_9ACAR	N/A	N/A	Proteasome subunit beta type (Fragment) OS=Hyalomma excavatum PE=2 SV=1	TRUE	8.03263	0.0002	329432	269669	326481	273047	12921.7	7378.62	59762.7	1.22161	0.0869343	0.818589	-0.28879
418	65	tr|A0A224Z659|A0A224Z659_9ACAR	N/A	N/A	Phosphoribosylaminoimidazolecarboxamide formyltransferase / IMP cyclohydrolase OS=Rhipicephalus zambeziensis PE=3 SV=1	TRUE	7.92362	0.00021	60958.1	27877.3	61390.2	25346.8	3795.58	7437.39	33080.8	2.18665	0.33978	0.45732	-1.12873
419	107	tr|F1PTY1|F1PTY1_CANLF	N/A	N/A	Keratin, type II cytoskeletal 1 OS=Canis lupus familiaris GN=KRT1 PE=3 SV=1	TRUE	-7.93357	0.00021	1.30338e+06	2.66059e+06	1.34765e+06	2.66037e+06	111280	323542	-1.35721e+06	0.489883	-0.309907	2.0413	1.02949
420	21	tr|G3MGQ1|G3MGQ1_9ACAR	N/A	N/A	Tubulin alpha chain (Fragment) OS=Amblyomma maculatum PE=2 SV=1	TRUE	-7.88195	0.00022	3.44751e+06	4.22845e+06	3.50052e+06	4.18768e+06	140534	139703	-780937	0.815314	-0.0886753	1.22652	0.294573
421	24	tr|A0A131YS77|A0A131YS77_RHIAP	N/A	N/A	KSR 2 misexpression suppressor OS=Rhipicephalus appendiculatus PE=4 SV=1	TRUE	-7.84007	0.00023	1.88115e+06	2.41747e+06	1.85953e+06	2.40495e+06	74338	114858	-536322	0.778147	-0.108938	1.2851	0.361885
422	691	tr|L7MCC0|L7MCC0_9ACAR	N/A	N/A	Putative heat shock protein (Fragment) OS=Rhipicephalus pulchellus PE=2 SV=1	TRUE	7.83974	0.00023	19099.8	10736.9	19211	10888.9	514.919	2070.39	8362.9	1.77889	0.25015	0.562148	-0.830979
423	787	tr|V5I2Q5|V5I2Q5_IXORI	N/A	N/A	Putative g-protein alpha subunit (Fragment) OS=Ixodes ricinus PE=2 SV=1	TRUE	-7.74783	0.00024	4664.04	18437.9	5076.29	18182.1	1782.43	3076.48	-13773.8	0.25296	-0.596948	3.9532	1.98302
424	798	tr|L7LYM2|L7LYM2_9ACAR	N/A	N/A	Uncharacterized protein OS=Rhipicephalus pulchellus PE=2 SV=1	TRUE	7.7587	0.00024	55016	35058.2	54915.8	34466	2276.3	4613.62	19957.8	1.56928	0.195699	0.637237	-0.650099
425	338	tr|A0A131YU69|A0A131YU69_RHIAP	N/A	N/A	Tick thioester protein OS=Rhipicephalus appendiculatus PE=4 SV=1	TRUE	7.63586	0.00026	77253.3	22849.9	78064.8	22737	13513.7	4519.51	54403.4	3.3809	0.529033	0.295779	-1.75741
426	571	tr|L7LZM3|L7LZM3_9ACAR	N/A	N/A	Putative cytochrome c OS=Rhipicephalus pulchellus PE=2 SV=1	TRUE	7.67421	0.00026	128670	99410.2	130154	99435.3	3915.23	6543.7	29260	1.29434	0.112047	0.772597	-0.372213
427	725	tr|L7MKF4|L7MKF4_9ACAR	N/A	N/A	Phosphoinositide phospholipase C (Fragment) OS=Rhipicephalus pulchellus PE=2 SV=1	TRUE	-7.65637	0.00026	1321.85	10637.6	328.611	10713.9	2020.71	1355.88	-9315.71	0.124262	-0.90566	8.04749	3.00854
428	819	tr|A0A131YI91|A0A131YI91_RHIAP	N/A	N/A	Cuticle protein OS=Rhipicephalus appendiculatus PE=4 SV=1	TRUE	-7.6759	0.00026	157442	188811	157718	190026	3619.86	7328.1	-31369.1	0.83386	-0.078907	1.19924	0.262123
429	176	tr|A0A224YPB5|A0A224YPB5_9ACAR	N/A	N/A	Heat shock protein OS=Rhipicephalus zambeziensis PE=3 SV=1	TRUE	7.60984	0.00027	1.68458e+06	1.46735e+06	1.67343e+06	1.46188e+06	50539.8	26556.9	217232	1.14804	0.0599584	0.871047	-0.199177
430	289	tr|V5HC22|V5HC22_IXORI	N/A	N/A	40S ribosomal protein S6 OS=Ixodes ricinus PE=2 SV=1	TRUE	-7.60459	0.00027	112738	166022	113497	169996	8700.81	10985.3	-53283.7	0.679055	-0.168095	1.47263	0.558399
431	335	tr|A0A131XKD7|A0A131XKD7_9ACAR	N/A	N/A	MICOS complex subunit MIC60 OS=Hyalomma excavatum PE=2 SV=1	TRUE	7.60276	0.00027	127142	54791.7	127480	60043.9	9900.45	16254.9	72350	2.32046	0.365573	0.43095	-1.21441
432	452	tr|L7LQP4|L7LQP4_9ACAR	N/A	N/A	Putative salivary lipocalin OS=Rhipicephalus pulchellus PE=2 SV=1	TRUE	-7.58955	0.00027	323518	2.5469e+06	322431	2.59161e+06	49814.8	583784	-2.22338e+06	0.127024	-0.896114	7.87252	2.97683
433	745	tr|A0A023G079|A0A023G079_9ACAR	N/A	N/A	Putative aicar transformylase/imp cyclohydrolase/methylglyoxal synthase (Fragment) OS=Amblyomma parvum PE=2 SV=1	TRUE	7.61172	0.00027	23751.6	15290.6	24337.6	15145.4	1948.85	1069.72	8460.93	1.55334	0.191267	0.643774	-0.635375
434	801	tr|L7LRB1|L7LRB1_9ACAR	N/A	N/A	Putative group ii salivary lipocalin OS=Rhipicephalus pulchellus PE=2 SV=1	TRUE	7.59812	0.00027	26700.6	9582.55	26796.8	9534.04	2197.84	3933.47	17118	2.78637	0.445039	0.35889	-1.47839
435	672	tr|L7MMU0|L7MMU0_9ACAR	N/A	N/A	Galectin (Fragment) OS=Rhipicephalus pulchellus PE=2 SV=1	TRUE	-7.55338	0.00028	33780.4	49794.9	35414.7	50630	3476.9	2427.28	-16014.4	0.678392	-0.168519	1.47407	0.55981
436	750	tr|A0A131YU14|A0A131YU14_RHIAP	N/A	N/A	Dihydropyrimidinase OS=Rhipicephalus appendiculatus PE=4 SV=1	TRUE	7.55537	0.00028	77992.7	60488.7	78687.9	61130	3009.85	3522.84	17504	1.28938	0.11038	0.775568	-0.366674
437	22	tr|A0A224Z9V2|A0A224Z9V2_9ACAR	N/A	N/A	Transitional endoplasmic reticulum ATPase OS=Rhipicephalus zambeziensis PE=3 SV=1	TRUE	7.49964	0.00029	484784	402274	484321	401074	15354.3	15760.9	82509.6	1.20511	0.0810259	0.829801	-0.269162
438	167	tr|A0A224YGJ1|A0A224YGJ1_9ACAR	N/A	N/A	Acetyl-CoA acyltransferase OS=Rhipicephalus zambeziensis PE=3 SV=1	TRUE	-7.49927	0.00029	705262	949649	727318	960428	56133	33121	-244386	0.742656	-0.129212	1.34652	0.429234
439	257	tr|L7M5X2|L7M5X2_9ACAR	N/A	N/A	Putative ribosomal protein OS=Rhipicephalus pulchellus PE=2 SV=1	TRUE	-7.50278	0.00029	453988	623686	454932	615490	9470.76	44233.4	-169697	0.727912	-0.137921	1.37379	0.458164
440	596	tr|A0A023FLK6|A0A023FLK6_9ACAR	N/A	N/A	Putative neural cell adhesion molecule l1 (Fragment) OS=Amblyomma cajennense PE=2 SV=1	TRUE	7.50033	0.00029	449670	358535	450927	364614	11530	21392.3	91135.2	1.25419	0.0983625	0.797329	-0.326753
441	303	tr|L7M8A8|L7M8A8_9ACAR	N/A	N/A	Putative chaperonin OS=Rhipicephalus pulchellus PE=2 SV=1	TRUE	7.40979	0.00031	121709	85505.2	122060	87220.2	6221.57	7535.22	36203.4	1.42341	0.153329	0.702541	-0.509347
442	69	tr|A0A224Z0H9|A0A224Z0H9_9ACAR	N/A	N/A	RNA-binding protein LARK OS=Rhipicephalus zambeziensis PE=4 SV=1	TRUE	7.36079	0.00032	258154	129420	261866	132600	19481.4	29051	128734	1.9947	0.299878	0.501328	-0.996174
443	161	tr|A0A224Y664|A0A224Y664_9ACAR	N/A	N/A	Glycine rich superfamily member (Fragment) OS=Rhipicephalus zambeziensis PE=4 SV=1	TRUE	7.33165	0.00033	3.447e+06	2.42971e+06	3.52142e+06	2.45797e+06	230390	154693	1.01729e+06	1.41869	0.151887	0.704877	-0.504556
444	358	tr|L7M116|L7M116_9ACAR	N/A	N/A	Putative calcium/calmodulin-dependent protein kinase ii OS=Rhipicephalus pulchellus PE=2 SV=1	TRUE	-7.30778	0.00033	123731	168926	120264	169649	11699.1	4015.34	-45194.9	0.732457	-0.135218	1.36527	0.449184
445	146	tr|A0A224YZF6|A0A224YZF6_9ACAR	N/A	N/A	Glutathione S-transferase OS=Rhipicephalus zambeziensis PE=3 SV=1	TRUE	7.29091	0.00034	1.26379e+06	110670	1.40256e+06	107785	316090	11976.5	1.15312e+06	11.4195	1.05765	0.0875698	-3.51342
446	260	tr|L7LX53|L7LX53_9ACAR	N/A	N/A	Putative low-density lipoprotein receptor domain class a OS=Rhipicephalus pulchellus PE=2 SV=1	TRUE	-7.29527	0.00034	99902.3	127383	99067.7	124780	3803.5	6503.11	-27480.3	0.78427	-0.105535	1.27507	0.350578
447	279	tr|A0A224Z1P8|A0A224Z1P8_9ACAR	N/A	N/A	Large subunit ribosomal protein L22e OS=Rhipicephalus zambeziensis PE=4 SV=1	TRUE	-7.29017	0.00034	352771	429054	357936	428049	17162.8	11975.3	-76283.4	0.822206	-0.0850196	1.21624	0.282429
448	382	tr|A0A224YM81|A0A224YM81_9ACAR	N/A	N/A	Elongation factor 1-delta OS=Rhipicephalus zambeziensis PE=3 SV=1	TRUE	7.3035	0.00034	135306	68478.4	135008	71772.7	4630.92	17704.5	66827.7	1.97589	0.295764	0.5061	-0.982506
449	221	tr|A0A224Z1B9|A0A224Z1B9_9ACAR	N/A	N/A	Small subunit ribosomal protein S18e OS=Rhipicephalus zambeziensis PE=3 SV=1	TRUE	7.26595	0.00035	520360	405160	512040	409230	28498.9	13903.5	115200	1.28433	0.108677	0.778615	-0.361018
450	485	tr|F1PCE8|F1PCE8_CANLF	N/A	N/A	Uncharacterized protein OS=Canis lupus familiaris GN=LOC475521 PE=3 SV=1	TRUE	-7.26254	0.00035	1.38454e+06	1.57036e+06	1.38438e+06	1.58898e+06	24394.7	44982.2	-185817	0.881672	-0.0546928	1.13421	0.181685
451	682	tr|L7M432|L7M432_9ACAR	N/A	N/A	Histone H2A OS=Rhipicephalus pulchellus PE=2 SV=1	TRUE	7.26161	0.00035	101820	91693.2	101638	91861.9	1948	1996.33	10127.3	1.11045	0.0454981	0.900538	-0.151141
452	628	tr|A0A224YSG1|A0A224YSG1_9ACAR	N/A	N/A	60S ribosomal protein L6 OS=Rhipicephalus zambeziensis PE=3 SV=1	TRUE	-7.20601	0.00036	89593.6	130516	89282.1	133230	2771.11	11014.5	-40922.2	0.686458	-0.163386	1.45675	0.542756
453	318	tr|L7M6I8|L7M6I8_9ACAR	N/A	N/A	Putative ribosomal protein s13 OS=Rhipicephalus pulchellus PE=2 SV=1	TRUE	-7.16308	0.00037	220258	256081	217715	255620	7893.82	6142.53	-35823.1	0.860111	-0.0654457	1.16264	0.217406
454	674	tr|L7M7V3|L7M7V3_9ACAR	N/A	N/A	GTP-binding nuclear protein OS=Rhipicephalus pulchellus PE=2 SV=1	TRUE	-7.19366	0.00037	63773.7	87147.2	63051.2	86846.6	2912.57	5809.1	-23373.5	0.731793	-0.135612	1.36651	0.450493
455	6	tr|A0A131ZAM9|A0A131ZAM9_RHIAP	N/A	N/A	Twitchin like (Fragment) OS=Rhipicephalus appendiculatus PE=4 SV=1	TRUE	7.14794	0.00038	399145	281525	405578	284349	21757.6	24692	117621	1.4178	0.151614	0.705319	-0.503652
456	234	tr|A0A131YZI8|A0A131YZI8_RHIAP	N/A	N/A	Dihydropyrimidinase OS=Rhipicephalus appendiculatus PE=4 SV=1	TRUE	7.08996	0.0004	252325	211653	250603	214835	5733.62	9937.79	40672.2	1.19216	0.0763363	0.83881	-0.253584
457	795	tr|L7M444|L7M444_9ACAR	N/A	N/A	Putative secreted protein OS=Rhipicephalus pulchellus PE=2 SV=1	TRUE	-7.02521	0.00042	46374.2	57469.6	46295.6	56830.7	626.896	3095.93	-11095.5	0.806933	-0.0931625	1.23926	0.309479
458	739	tr|A0A224YP86|A0A224YP86_9ACAR	N/A	N/A	H/ACA ribonucleoprotein complex subunit OS=Rhipicephalus zambeziensis PE=3 SV=1	TRUE	-6.97145	0.00043	23376.2	40683.4	23122	40190.4	1872.81	4598.41	-17307.2	0.574589	-0.240643	1.74037	0.799398
459	110	tr|A0A224Z3G3|A0A224Z3G3_9ACAR	N/A	N/A	V-type H+-transporting ATPase subunit A OS=Rhipicephalus zambeziensis PE=3 SV=1	TRUE	-6.9256	0.00045	295996	440288	302320	439468	18284.4	37443.4	-144292	0.672277	-0.172451	1.48748	0.572871
460	664	tr|L7M3T4|L7M3T4_9ACAR	N/A	N/A	Putative cdc42 OS=Rhipicephalus pulchellus PE=2 SV=1	TRUE	-6.8224	0.00049	2915.42	12145.5	3347.06	12743.7	1676.32	2124	-9230.08	0.240041	-0.619715	4.16596	2.05865
461	708	tr|L7M4E9|L7M4E9_9ACAR	N/A	N/A	Inositol-1-monophosphatase OS=Rhipicephalus pulchellus PE=2 SV=1	TRUE	6.78939	0.0005	22573.5	5916.53	22484.5	4356.42	961.038	4811.72	16656.9	3.81532	0.581531	0.262101	-1.9318
462	688	tr|A0A224Z4P0|A0A224Z4P0_9ACAR	N/A	N/A	Small subunit ribosomal protein S28e OS=Rhipicephalus zambeziensis PE=4 SV=1	TRUE	6.70898	0.00053	84487	65154.3	84014.1	65723.3	5031.61	2810.28	19332.7	1.29672	0.112847	0.771175	-0.374869
463	215	tr|L7MAX7|L7MAX7_9ACAR	N/A	N/A	Putative eukaryotic translation initiation factor 4a2 OS=Rhipicephalus pulchellus PE=2 SV=1	TRUE	6.68289	0.00054	221430	160776	221403	162008	2878.64	17922.4	60654.3	1.37726	0.139016	0.726079	-0.461801
464	632	tr|L7M1W2|L7M1W2_9ACAR	N/A	N/A	Putative thioredoxin peroxidase strongylocentrotus purpuratus: similar to thioredoxin peroxidase OS=Rhipicephalus pulchellus PE=2 SV=1	TRUE	6.69129	0.00054	43124.3	25542.1	42370.7	25037.2	4944.49	1780.29	17582.1	1.68836	0.227465	0.592291	-0.755621
465	119	tr|A0A224YQ72|A0A224YQ72_9ACAR	N/A	N/A	Gelsolin OS=Rhipicephalus zambeziensis PE=4 SV=1	TRUE	6.62139	0.00057	83240.8	46213.7	82285.7	43121.4	6854.73	8837.24	37027.1	1.80122	0.255566	0.555181	-0.848971
466	719	tr|A0A131XID5|A0A131XID5_9ACAR	N/A	N/A	Putative chaperonin subunit OS=Hyalomma excavatum PE=2 SV=1	TRUE	6.6251	0.00057	29555.3	25831	29711.2	25986.7	844.886	741.764	3724.29	1.14418	0.058494	0.873989	-0.194313
467	825	tr|A0A131Z0H3|A0A131Z0H3_RHIAP	N/A	N/A	Abc transporter OS=Rhipicephalus appendiculatus PE=4 SV=1	TRUE	6.59965	0.00058	115935	81136	115958	79963.6	5386.45	9066.31	34799	1.4289	0.155001	0.699841	-0.514901
468	554	tr|A0A1E1X6L6|A0A1E1X6L6_9ACAR	N/A	N/A	Putative dehydrogenase with different specificities related to short-chain alcohol dehydrogenase OS=Amblyomma aureolatum PE=2 SV=1	TRUE	6.58558	0.00059	168735	135939	166240	135773	9508.75	2963.26	32795.5	1.24125	0.0938595	0.805639	-0.311794
469	744	tr|A0A131XQY3|A0A131XQY3_9ACAR	N/A	N/A	Putative grp-3 497 glycine rich family OS=Hyalomma excavatum PE=2 SV=1	TRUE	-6.43969	0.00066	51083.2	231591	50691.4	232941	54549.8	12929.3	-180508	0.220575	-0.656444	4.53361	2.18066
470	141	tr|A0A224YV05|A0A224YV05_9ACAR	N/A	N/A	Calmodulin OS=Rhipicephalus zambeziensis PE=4 SV=1	TRUE	6.42803	0.00067	1.94289e+06	1.7696e+06	1.94368e+06	1.77179e+06	31883.7	43479.7	173291	1.09793	0.0405732	0.910808	-0.134781
471	200	tr|L7M5R1|L7M5R1_9ACAR	N/A	N/A	Proteasome subunit alpha type OS=Rhipicephalus pulchellus PE=2 SV=1	TRUE	6.42825	0.00067	139583	88329.4	143219	88344.4	10949.5	11593	51254	1.58026	0.198728	0.632808	-0.660161
472	198	tr|A0A224YKT3|A0A224YKT3_9ACAR	N/A	N/A	D-3-phosphoglycerate dehydrogenase OS=Rhipicephalus zambeziensis PE=3 SV=1	TRUE	6.41533	0.00068	425334	289645	430541	278487	14247.8	39829.7	135688	1.46846	0.166864	0.680983	-0.554309
473	315	tr|L7M720|L7M720_9ACAR	N/A	N/A	Putative heat shock protein OS=Rhipicephalus pulchellus PE=2 SV=1	TRUE	-6.39048	0.00069	311125	360516	312782	360609	7762.62	13367.2	-49391.1	0.862999	-0.0639897	1.15875	0.212569
474	284	tr|L7LWU5|L7LWU5_9ACAR	N/A	N/A	Putative microtubule associated complex OS=Rhipicephalus pulchellus PE=2 SV=1	TRUE	6.34883	0.00072	307845	229233	305608	230159	11612.6	21872.6	78611.6	1.34293	0.128054	0.744639	-0.425387
475	551	tr|A0A131ZCD0|A0A131ZCD0_RHIAP	N/A	N/A	Lipoprotein amino terminal region (Fragment) OS=Rhipicephalus appendiculatus PE=4 SV=1	TRUE	-6.34847	0.00072	9429.45	19935.4	9792.51	20588.2	1926.68	2691.16	-10505.9	0.473001	-0.325138	2.11416	1.08009
476	213	tr|A0A224ZBN2|A0A224ZBN2_9ACAR	N/A	N/A	Vigilin OS=Rhipicephalus zambeziensis PE=4 SV=1	TRUE	6.32451	0.00073	100945	49887.4	101757	52672.8	4123.4	15610.7	51058.1	2.02347	0.306096	0.494202	-1.01683
477	578	tr|A0A224YCS2|A0A224YCS2_9ACAR	N/A	N/A	Metallopeptidase OS=Rhipicephalus zambeziensis PE=4 SV=1	TRUE	6.30727	0.00074	78521.3	39417.4	78254	44128	4210.79	11662.8	39103.9	1.99205	0.299299	0.501996	-0.994251
478	652	tr|A0A224YG77|A0A224YG77_9ACAR	N/A	N/A	26S proteasome regulatory subunit N10 OS=Rhipicephalus zambeziensis PE=4 SV=1	TRUE	-6.30738	0.00074	3417.89	8872.37	3363.75	8800.08	986.699	1420.49	-5454.48	0.385228	-0.414282	2.59586	1.37621
479	894	tr|A0A224YKL3|A0A224YKL3_9ACAR	N/A	N/A	Cystathionine gamma-lyase OS=Rhipicephalus zambeziensis PE=3 SV=1	TRUE	6.29594	0.00075	35996.1	7045.97	35892.4	2891.6	1175.35	9121.01	28950.1	5.10875	0.708314	0.195743	-2.35297
480	138	tr|A0A224Z329|A0A224Z329_9ACAR	N/A	N/A	Ubiquitin-activating enzyme E1 OS=Rhipicephalus zambeziensis PE=3 SV=1	TRUE	6.27981	0.00076	96475.5	61699.9	96262.2	65638.4	5919.34	9360.83	34775.6	1.56363	0.194133	0.639539	-0.644895
481	191	tr|L7M8D5|L7M8D5_9ACAR	N/A	N/A	Putative aldehyde dehydrogenase OS=Rhipicephalus pulchellus PE=2 SV=1	TRUE	6.26372	0.00077	315993	228149	314545	222169	6173.71	27360.8	87844.7	1.38503	0.14146	0.722005	-0.46992
482	218	tr|A0A224YKA5|A0A224YKA5_9ACAR	N/A	N/A	Uncharacterized protein OS=Rhipicephalus zambeziensis PE=4 SV=1	TRUE	6.26128	0.00077	638610	584933	640042	590622	8369.95	14963.7	53676.4	1.09177	0.0381292	0.915948	-0.126662
483	532	tr|A0A023G113|A0A023G113_9ACAR	N/A	N/A	Putative cysteine proteinase ixodes scapularis cysteine proteinase (Fragment) OS=Amblyomma parvum PE=2 SV=1	TRUE	-6.26584	0.00077	294640	485879	292009	485225	10072.6	60204.8	-191238	0.606407	-0.217236	1.64906	0.721641
484	898	tr|B7PV15|B7PV15_IXOSC	N/A	N/A	Glyoxylate/hydroxypyruvate reductase, putative OS=Ixodes scapularis GN=8031760 PE=3 SV=1	TRUE	6.22785	0.00079	114130	88519.4	113779	87896.1	6954.69	4390.38	25610.6	1.28932	0.110361	0.775601	-0.366613
485	206	tr|A0A023G5Y4|A0A023G5Y4_9ACAR	N/A	N/A	Putative neural cell adhesion molecule l1 (Fragment) OS=Amblyomma triste PE=2 SV=1	TRUE	6.14447	0.00085	98687.7	65676.1	97299	62811.4	5118.78	9447.56	33011.6	1.50264	0.176856	0.665494	-0.587502
486	40	tr|A0A224YJV6|A0A224YJV6_9ACAR	N/A	N/A	Clathrin heavy chain OS=Rhipicephalus zambeziensis PE=3 SV=1	TRUE	-6.1262	0.00086	112950	150417	112230	149215	8196.63	9079.06	-37466.8	0.750913	-0.12441	1.33171	0.413282
487	329	tr|L7LZX8|L7LZX8_9ACAR	N/A	N/A	Putative alanine aminotransferase OS=Rhipicephalus pulchellus PE=2 SV=1	TRUE	6.123	0.00087	88074.8	67746.8	87662.6	69319.5	5563.88	3623.68	20327.9	1.30006	0.113963	0.769197	-0.378575
488	880	tr|L7M3Z4|L7M3Z4_9ACAR	N/A	N/A	Uncharacterized protein OS=Rhipicephalus pulchellus PE=2 SV=1	TRUE	6.11725	0.00087	88418.4	67780.4	87386	66013.7	4671.14	4869.19	20638	1.30448	0.115439	0.766587	-0.383479
489	705	tr|L7LYX3|L7LYX3_9ACAR	N/A	N/A	Putative vesicle coat complex copii subunit sec23 OS=Rhipicephalus pulchellus PE=2 SV=1	TRUE	6.104	0.00088	16917.5	13768.2	16684.1	13664.8	676.25	779.41	3149.32	1.22874	0.0894597	0.813842	-0.297179
490	514	tr|A0A131YW86|A0A131YW86_RHIAP	N/A	N/A	Fasciclin domain containing protein OS=Rhipicephalus appendiculatus PE=4 SV=1	TRUE	-6.0708	0.00091	71948.6	121974	77758.5	122206	15638.2	5202.08	-50025.6	0.589867	-0.229246	1.6953	0.761538
491	623	tr|A0A224YJ26|A0A224YJ26_9ACAR	N/A	N/A	Phospholipase A2 OS=Rhipicephalus zambeziensis PE=4 SV=1	TRUE	6.05431	0.00092	89708.2	70350.9	89906.5	70765.3	2972.86	5661.48	19357.3	1.27515	0.105562	0.784219	-0.350671
492	398	tr|A0A224Y3V0|A0A224Y3V0_9ACAR	N/A	N/A	Glycine rich superfamily member OS=Rhipicephalus zambeziensis PE=4 SV=1	TRUE	-6.03857	0.00093	20905.8	60265.3	20220.9	55620.7	6831.09	11102.9	-39359.5	0.346896	-0.459801	2.88271	1.52742
493	159	tr|A0A224Z257|A0A224Z257_9ACAR	N/A	N/A	Succinate dehydrogenase [ubiquinone] iron-sulfur subunit, mitochondrial OS=Rhipicephalus zambeziensis PE=3 SV=1	TRUE	-6.0293	0.00094	283562	477636	289139	497013	40175.4	50302.2	-194073	0.593679	-0.226448	1.68441	0.752245
494	354	tr|A0A131YDG8|A0A131YDG8_RHIAP	N/A	N/A	Cuticular protein OS=Rhipicephalus appendiculatus PE=4 SV=1	TRUE	-6.00951	0.00096	261082	295644	262318	296928	7489.08	8730.3	-34561.8	0.883097	-0.0539917	1.13238	0.179357
495	692	tr|L7M4S5|L7M4S5_9ACAR	N/A	N/A	Proteasome subunit alpha type OS=Rhipicephalus pulchellus PE=2 SV=1	TRUE	5.96463	0.00099	77636.1	55789	79535.7	56708.3	4609.55	5693.49	21847.1	1.3916	0.143515	0.718596	-0.476748
496	515	tr|L7M4U7|L7M4U7_9ACAR	N/A	N/A	Eukaryotic translation initiation factor 3 subunit F OS=Rhipicephalus pulchellus PE=2 SV=1	TRUE	-5.9453	0.00101	81364	116652	81207.4	119029	1328.31	11796.2	-35287.6	0.697496	-0.156458	1.4337	0.519743
497	106	tr|A0A224Z6S5|A0A224Z6S5_9ACAR	N/A	N/A	40S ribosomal protein S3a OS=Rhipicephalus zambeziensis PE=3 SV=1	TRUE	-5.90253	0.00105	497585	591524	498826	598320	24921.4	19801.1	-93939.2	0.841191	-0.0751052	1.18879	0.249494
498	341	tr|C9W1P7|C9W1P7_RHISA	N/A	N/A	ATP synthase H+ transporting mitochondrial F1 complex delta subunit OS=Rhipicephalus sanguineus PE=2 SV=1	TRUE	5.8297	0.00112	206072	172033	205911	177171	811.442	11649.5	34038.7	1.19786	0.0784066	0.834821	-0.260461
499	606	tr|L7M5T3|L7M5T3_9ACAR	N/A	N/A	Proteasome subunit alpha type OS=Rhipicephalus pulchellus PE=2 SV=1	TRUE	5.82068	0.00113	105188	83992.3	102967	83654.6	6733.45	2774.99	21195.6	1.25235	0.0977262	0.798498	-0.324639
500	701	tr|L7MHC5|L7MHC5_9ACAR	N/A	N/A	Putative glutamine synthetase (Fragment) OS=Rhipicephalus pulchellus PE=2 SV=1	TRUE	5.81042	0.00114	62465.3	50028.4	62966	50983.1	3093.76	2958.81	12436.9	1.2486	0.0964218	0.8009	-0.320306
501	343	tr|A0A224YMM2|A0A224YMM2_9ACAR	N/A	N/A	Cytochrome b5 OS=Rhipicephalus zambeziensis PE=3 SV=1	TRUE	-5.80218	0.00115	177072	244051	176102	243994	14113.1	18271.7	-66979.1	0.725553	-0.139331	1.37826	0.462847
502	228	tr|A0A131YX76|A0A131YX76_RHIAP	N/A	N/A	Cysteine proteinase OS=Rhipicephalus appendiculatus PE=3 SV=1	TRUE	-5.74159	0.00121	303528	380231	296296	381408	18034.8	19713.2	-76702.5	0.798274	-0.0978482	1.2527	0.325045
503	509	tr|B7PA50|B7PA50_IXOSC	N/A	N/A	Cuticular protein, putative OS=Ixodes scapularis GN=8026845 PE=4 SV=1	TRUE	5.67642	0.00129	1.28272e+06	518237	1.28406e+06	516020	33965.8	267205	764487	2.47517	0.393605	0.404013	-1.30753
504	68	tr|A0A224YSP8|A0A224YSP8_9ACAR	N/A	N/A	LIM domain-containing protein OS=Rhipicephalus zambeziensis PE=4 SV=1	TRUE	-5.65069	0.00132	372639	2.47476e+06	355334	2.82913e+06	55192.7	741973	-2.10212e+06	0.150576	-0.822244	6.64117	2.73144
505	71	tr|L7LTQ8|L7LTQ8_9ACAR	N/A	N/A	Putative heteroproteinous nuclear ribonucleoprotein at 87f OS=Rhipicephalus pulchellus PE=2 SV=1	TRUE	-5.63784	0.00133	2.26275e+06	2.87853e+06	2.1834e+06	2.85755e+06	181733	121207	-615779	0.786079	-0.104534	1.27214	0.347254
506	667	tr|L7M6S3|L7M6S3_9ACAR	N/A	N/A	Putative bifunctional atp sulfurylase/adenosine 5'-phosphosulfate kinase OS=Rhipicephalus pulchellus PE=2 SV=1	TRUE	5.6371	0.00133	16880	9733.62	16664.9	9214.95	1348.65	2147.07	7146.43	1.7342	0.239099	0.576635	-0.79427
507	759	tr|A0A034WZ83|A0A034WZ83_RHIMP	N/A	N/A	Secreted protein 28 (Fragment) OS=Rhipicephalus microplus PE=4 SV=1	TRUE	-5.57911	0.00141	122233	135351	121593	136109	3092.9	3542.22	-13117.8	0.903083	-0.0442725	1.10732	0.14707
508	205	tr|A0A131XPK1|A0A131XPK1_9ACAR	N/A	N/A	Putative actin-binding cytoskeleton protein filamin (Fragment) OS=Hyalomma excavatum PE=2 SV=1	TRUE	5.55974	0.00143	696592	456848	696986	494742	7233.22	85939.2	239745	1.52478	0.183207	0.655832	-0.608601
509	103	tr|A0A224YLL0|A0A224YLL0_9ACAR	N/A	N/A	2-oxoglutarate dehydrogenase E1 component OS=Rhipicephalus zambeziensis PE=4 SV=1	TRUE	-5.5515	0.00144	166904	221289	168935	220003	6638.21	18434.2	-54385.4	0.754234	-0.122494	1.32585	0.406916
510	346	tr|A0A224ZAU9|A0A224ZAU9_9ACAR	N/A	N/A	Troponin I protein OS=Rhipicephalus zambeziensis PE=4 SV=1	TRUE	5.52644	0.00148	122069	103735	122292	102178	2959.62	5938.27	18333.8	1.17674	0.0706795	0.849807	-0.234792
511	757	tr|A0A1E1XN62|A0A1E1XN62_9ACAR	N/A	N/A	Putative actin-2 (Fragment) OS=Amblyomma sculptum PE=2 SV=1	TRUE	5.51983	0.00149	4.17663e+06	3.43257e+06	4.24741e+06	3.43803e+06	268959	18512.4	744061	1.21677	0.0852067	0.821851	-0.283051
512	392	tr|L7M4Q4|L7M4Q4_9ACAR	N/A	N/A	60S ribosomal protein L18a OS=Rhipicephalus pulchellus PE=2 SV=1	TRUE	-5.50326	0.00151	339774	393634	340395	391136	4455.98	19059.8	-53859.8	0.863173	-0.0639023	1.15852	0.212279
513	840	tr|L7M2B5|L7M2B5_9ACAR	N/A	N/A	Proteasome subunit alpha type OS=Rhipicephalus pulchellus PE=2 SV=1	TRUE	5.49304	0.00152	85444.4	62370.2	87553	62318.2	8276.44	1442.81	23074.2	1.36996	0.136707	0.729951	-0.454129
514	302	tr|L7M6A6|L7M6A6_9ACAR	N/A	N/A	Profilin OS=Rhipicephalus pulchellus PE=2 SV=1	TRUE	-5.45092	0.00159	294960	349867	298440	353068	14984.2	13465.7	-54906.6	0.843064	-0.0741392	1.18615	0.246285
515	76	tr|A0A224Z3B3|A0A224Z3B3_9ACAR	N/A	N/A	V-type H+-transporting ATPase subunit B OS=Rhipicephalus zambeziensis PE=3 SV=1	TRUE	-5.39437	0.00167	18682.6	52269.6	18622.4	52180	411.447	12445.8	-33587	0.357428	-0.446812	2.79777	1.48428
516	94	tr|A0A023FX57|A0A023FX57_9ACAR	N/A	N/A	Annexin (Fragment) OS=Amblyomma parvum PE=2 SV=1	TRUE	5.37692	0.0017	159402	96465.5	160786	87636.2	4094.93	23048.8	62936.2	1.65242	0.218121	0.605172	-0.724582
517	862	tr|A0A131YZ91|A0A131YZ91_RHIAP	N/A	N/A	Molybdopterin cofactor sulfurase OS=Rhipicephalus appendiculatus PE=4 SV=1	TRUE	5.33342	0.00177	20254	6782.91	20386.7	7620.13	2296.86	4499.22	13471.1	2.98604	0.475095	0.334892	-1.57823
518	528	tr|A0A224YB96|A0A224YB96_9ACAR	N/A	N/A	Lipocalin OS=Rhipicephalus zambeziensis PE=4 SV=1	TRUE	5.32978	0.00178	58630.4	42122.2	58226.4	41980.2	2514.08	5661.59	16508.2	1.39191	0.143611	0.718437	-0.477067
519	350	tr|A0A131XNG6|A0A131XNG6_9ACAR	N/A	N/A	Glyceraldehyde-3-phosphate dehydrogenase OS=Hyalomma excavatum PE=2 SV=1	TRUE	5.2809	0.00186	153010	80050.5	153662	81633.7	4024.94	27336.8	72959.6	1.91142	0.281356	0.523171	-0.934644
520	319	tr|L7M8B5|L7M8B5_9ACAR	N/A	N/A	Putative spliceosome rna helicase ddx39b OS=Rhipicephalus pulchellus PE=2 SV=1	TRUE	5.2748	0.00187	118418	83122.5	121101	84458	8761.28	10116.2	35295.7	1.42462	0.1537	0.70194	-0.51058
521	425	tr|A0A224YU18|A0A224YU18_9ACAR	N/A	N/A	Crystallin alpha B OS=Rhipicephalus zambeziensis PE=3 SV=1	TRUE	-5.27029	0.00188	65435.5	96002.1	67358.1	94303.4	6053.29	9894.83	-30566.6	0.681605	-0.166467	1.46713	0.552992
522	903	tr|V5HZ17|V5HZ17_IXORI	N/A	N/A	Putative bent (Fragment) OS=Ixodes ricinus PE=2 SV=1	TRUE	5.23978	0.00194	14881.7	7945.63	15095.3	8467.8	445.935	2609.64	6936.08	1.87294	0.272524	0.533919	-0.905306
523	89	tr|A0A131XI81|A0A131XI81_9ACAR	N/A	N/A	Aspartate aminotransferase OS=Hyalomma excavatum PE=2 SV=1	TRUE	5.20646	0.002	753069	670186	752892	666305	9135	30499.7	82882.6	1.12367	0.0506391	0.88994	-0.16822
524	663	tr|A0A224YPN9|A0A224YPN9_9ACAR	N/A	N/A	Carbonyl reductase 1 OS=Rhipicephalus zambeziensis PE=3 SV=1	TRUE	5.18594	0.00204	23951.8	9901.88	23713.4	11557.3	1714.28	5140.13	14049.9	2.41891	0.38362	0.413409	-1.27436
525	808	tr|A0A224Z9U1|A0A224Z9U1_9ACAR	N/A	N/A	Thymus specific serine protease OS=Rhipicephalus zambeziensis PE=4 SV=1	TRUE	5.15705	0.0021	60263.9	48237.2	59019.5	48156.8	2678.93	3818.09	12026.7	1.24932	0.096675	0.800433	-0.321147
526	816	tr|A0A1E1WXN0|A0A1E1WXN0_9ACAR	N/A	N/A	Uncharacterized protein (Fragment) OS=Amblyomma aureolatum PE=2 SV=1	TRUE	-5.14179	0.00213	18687.8	27264.5	18871.6	26428.1	2031.89	2645.89	-8576.67	0.685427	-0.164039	1.45894	0.544925
527	522	tr|A0A224YEB4|A0A224YEB4_9ACAR	N/A	N/A	Glycine rich superfamily member (Fragment) OS=Rhipicephalus zambeziensis PE=4 SV=1	TRUE	5.11721	0.00218	116899	34125.5	117967	35596.6	3723.68	32136	82773.7	3.42557	0.534732	0.291923	-1.77634
528	661	tr|L7MAM7|L7MAM7_9ACAR	N/A	N/A	Putative programmed cell death 4 OS=Rhipicephalus pulchellus PE=2 SV=1	TRUE	-5.09305	0.00224	7482.56	12615.3	7437.07	12629.7	1437.49	1412.85	-5132.7	0.593136	-0.226846	1.68595	0.753566
529	369	tr|A0A131Z103|A0A131Z103_RHIAP	N/A	N/A	Uncharacterized protein OS=Rhipicephalus appendiculatus PE=4 SV=1	TRUE	5.02229	0.0024	139934	109014	139287	109428	1931.4	12160.7	30920.1	1.28364	0.108442	0.779037	-0.360236
530	873	tr|A0A023FQ51|A0A023FQ51_9ACAR	N/A	N/A	Transgelin (Fragment) OS=Amblyomma cajennense PE=2 SV=1	TRUE	5.01972	0.0024	53725.9	26131.3	53899.5	26047.2	1226.82	10925.8	27594.6	2.056	0.313023	0.486381	-1.03984
531	581	tr|A0A224ZAI3|A0A224ZAI3_9ACAR	N/A	N/A	Transforming growth factor-beta-induced protein OS=Rhipicephalus zambeziensis PE=4 SV=1	TRUE	4.96853	0.00253	32581.3	22033.3	31788.8	22228.6	2216.41	3621.54	10548.1	1.47873	0.16989	0.676255	-0.564361
532	881	tr|J9P5C8|J9P5C8_CANLF	N/A	N/A	Uncharacterized protein OS=Canis lupus familiaris PE=4 SV=1	TRUE	4.95606	0.00256	28118.6	7584	30707.4	7973.1	7969.97	2269.04	20534.6	3.70763	0.569096	0.269714	-1.8905
533	360	tr|L7MEN3|L7MEN3_9ACAR	N/A	N/A	Putative glycine rich protein (Fragment) OS=Rhipicephalus pulchellus PE=2 SV=1	TRUE	4.95012	0.00258	1.86658e+07	1.08155e+07	1.88549e+07	1.10333e+07	1.96106e+06	2.49287e+06	7.85034e+06	1.72584	0.237001	0.579427	-0.787301
534	497	tr|G3MMA7|G3MMA7_9ACAR	N/A	N/A	Uncharacterized protein OS=Amblyomma maculatum PE=2 SV=1	TRUE	-4.92825	0.00263	27303	33919.3	26854.8	34302.3	1844.39	1951.3	-6616.23	0.804942	-0.0942355	1.24233	0.313044
535	322	tr|A0A224Z865|A0A224Z865_9ACAR	N/A	N/A	RNA-binding protein Musashi OS=Rhipicephalus zambeziensis PE=4 SV=1	TRUE	4.8848	0.00275	132345	88090.1	134651	87987	17928.2	2624.48	44254.5	1.50238	0.176779	0.665612	-0.587247
536	431	tr|G3MQM7|G3MQM7_9ACAR	N/A+D211:D538+D30	N/A	Uncharacterized protein OS=Amblyomma maculatum PE=2 SV=1	TRUE	-4.85833	0.00283	26485.4	38523.2	25507.2	38713.4	3881.31	3081.01	-12037.8	0.687519	-0.162715	1.45451	0.540529
537	593	tr|C9W1Q2|C9W1Q2_RHISA	N/A	N/A	Protein disulfide isomerase OS=Rhipicephalus sanguineus PE=2 SV=1	TRUE	4.82587	0.00292	71564.2	43474.5	71269.7	38971.4	2992.47	11250.1	28089.6	1.64612	0.216461	0.60749	-0.719067
538	255	tr|A0A224YGE4|A0A224YGE4_9ACAR	N/A	N/A	60s ribosomal protein l7a OS=Rhipicephalus zambeziensis PE=4 SV=1	TRUE	-4.81772	0.00295	198313	297849	200619	308804	28234.2	30170.5	-99536.5	0.665816	-0.176646	1.50192	0.586805
539	304	tr|L7M7U4|L7M7U4_9ACAR	N/A	N/A	Proteasome subunit alpha type OS=Rhipicephalus pulchellus PE=2 SV=1	TRUE	4.78343	0.00305	225068	165223	224244	172126	5233.72	24468.6	59845.6	1.36221	0.134244	0.734101	-0.44595
540	677	tr|L7M2W4|L7M2W4_9ACAR	N/A	N/A	Putative copper chaperone atox1 copper chaperone atox1 OS=Rhipicephalus pulchellus PE=2 SV=1	TRUE	4.77618	0.00307	26911.9	21000.9	27132.3	20864.8	1392.87	2046.08	5910.95	1.28146	0.107706	0.780359	-0.35779
541	16	tr|A0A224Z539|A0A224Z539_9ACAR	N/A	N/A	Neurexin iii alpha (Fragment) OS=Rhipicephalus zambeziensis PE=4 SV=1	TRUE	4.76781	0.0031	359731	273482	360816	272186	29130.8	21456.2	86249.1	1.31537	0.119049	0.76024	-0.395473
542	394	tr|A0A131XKX7|A0A131XKX7_9ACAR	N/A	N/A	Putative aconitase/aconitase aconitase superfamily OS=Hyalomma excavatum PE=2 SV=1	TRUE	-4.76784	0.0031	31130.6	42445.3	30627.6	43243	2284.53	4160.28	-11314.7	0.733428	-0.134642	1.36346	0.447272
543	261	tr|L7M716|L7M716_9ACAR	N/A	N/A	Putative ribosomal protein s9 OS=Rhipicephalus pulchellus PE=2 SV=1	TRUE	-4.7662	0.00311	668912	843532	665552	874466	12754.3	72155.6	-174620	0.79299	-0.100732	1.26105	0.334626
544	731	tr|L7M8D2|L7M8D2_9ACAR	N/A	N/A	Putative reticulocalbin calumenin dna supercoiling factor OS=Rhipicephalus pulchellus PE=2 SV=1	TRUE	4.73551	0.00321	15727.2	10015.4	16376.1	10225.7	1892.78	1495.59	5711.83	1.57031	0.195984	0.636819	-0.651046
545	706	tr|A0A224YYL9|A0A224YYL9_9ACAR	N/A	N/A	Heat shock 70 kDa protein OS=Rhipicephalus zambeziensis PE=3 SV=1	TRUE	4.71955	0.00326	71385	47069.3	67747.9	47731.5	9691.49	3500.26	24315.7	1.51659	0.180869	0.659373	-0.600834
546	472	tr|A0A224Y7G2|A0A224Y7G2_9ACAR	N/A	N/A	MICOS complex subunit OS=Rhipicephalus zambeziensis PE=4 SV=1	TRUE	-4.71123	0.00329	23024	40224.6	23725.8	39785.6	3109.29	6606.85	-17200.5	0.572388	-0.24231	1.74707	0.804936
547	552	tr|A0A224ZAJ8|A0A224ZAJ8_9ACAR	N/A	N/A	Transaldolase OS=Rhipicephalus zambeziensis PE=3 SV=1	TRUE	4.70093	0.00332	34466.1	23773	33435	23609.4	4304.84	1471.37	10693.1	1.4498	0.161308	0.689751	-0.535853
548	493	tr|A0A131XI55|A0A131XI55_9ACAR	N/A	N/A	Putative f0f1-type atp synthase gamma subunit OS=Hyalomma excavatum PE=2 SV=1	TRUE	-4.68811	0.00337	201967	232391	202231	234393	6352.74	11318.1	-30423.7	0.869084	-0.0609384	1.15064	0.202433
549	699	tr|L7M5Q1|L7M5Q1_9ACAR	N/A	N/A	Putative e3 ubiquitin ligase OS=Rhipicephalus pulchellus PE=2 SV=1	TRUE	4.68164	0.00339	43415.6	22826.9	42809.3	20935.1	7003.63	5320.74	20588.7	1.90195	0.279199	0.525776	-0.92748
550	285	tr|L7MKN4|L7MKN4_9ACAR	N/A	N/A	Putative hydroxysteroid dehydrogenase-like protein 2 (Fragment) OS=Rhipicephalus pulchellus PE=2 SV=1	TRUE	4.67003	0.00343	122253	94747.6	125403	96357.2	10787.9	4730.88	27505.6	1.2903	0.110692	0.775011	-0.367711
551	356	tr|A0A023FG92|A0A023FG92_9ACAR	N/A	N/A	Uncharacterized protein OS=Amblyomma cajennense PE=2 SV=1	TRUE	4.65201	0.0035	146154	92086.8	145767	98581.7	12291.3	19729.3	54067.7	1.58714	0.200615	0.630065	-0.666428
552	273	tr|Q6WNW9|Q6WNW9_RHISA	N/A	N/A	Ferritin OS=Rhipicephalus sanguineus GN=Fer PE=2 SV=1	TRUE	4.63613	0.00355	155830	138156	155201	136857	4553.9	6115.35	17674.5	1.12793	0.0522827	0.886579	-0.173679
553	263	tr|A0A224Z685|A0A224Z685_9ACAR	N/A	N/A	Polyadenylate-binding protein OS=Rhipicephalus zambeziensis PE=3 SV=1	TRUE	4.62153	0.00361	119291	99422.7	120369	98139.2	4705.9	7196.22	19868.7	1.19984	0.0791235	0.833444	-0.262843
554	575	tr|L7M1V2|L7M1V2_9ACAR	N/A	N/A	Putative isovaleryl coenzyme a dehydrogenase OS=Rhipicephalus pulchellus PE=2 SV=1	TRUE	4.5847	0.00375	26510.1	18431.9	26531.3	17701.8	2331.71	2642.27	8078.22	1.43827	0.157841	0.695278	-0.524338
555	325	tr|A0A224YZD3|A0A224YZD3_9ACAR	N/A	N/A	Small subunit ribosomal protein S19e OS=Rhipicephalus zambeziensis PE=4 SV=1	TRUE	4.58115	0.00377	94601.5	65059.5	92679.3	66022.2	6011.74	11410.4	29542	1.45408	0.162587	0.687722	-0.540103
556	790	tr|L7MJF6|L7MJF6_9ACAR	N/A	N/A	GrpE protein homolog (Fragment) OS=Rhipicephalus pulchellus PE=2 SV=1	TRUE	4.54777	0.0039	6620.95	4030.9	6835.64	3882.09	776.781	833.083	2590.05	1.64255	0.215518	0.60881	-0.715935
557	97	tr|V5HMU2|V5HMU2_IXORI	N/A	N/A	Putative 14-3-3 logues OS=Ixodes ricinus PE=2 SV=1	TRUE	-4.53739	0.00394	1.02149e+06	1.09018e+06	1.01949e+06	1.0914e+06	6488.2	29573.1	-68688.2	0.936994	-0.0282634	1.06724	0.093889
558	129	tr|A0A131YXB1|A0A131YXB1_RHIAP	N/A	N/A	ATP-dependent RNA helicase DDX3X OS=Rhipicephalus appendiculatus PE=3 SV=1	TRUE	-4.49363	0.00413	129773	190760	136260	192810	20823.1	17411.9	-60986.7	0.680295	-0.167302	1.46995	0.555767
559	587	tr|L7M7W1|L7M7W1_9ACAR	N/A	N/A	Coatomer subunit delta OS=Rhipicephalus pulchellus PE=2 SV=1	TRUE	4.45488	0.00431	63746	56124.5	63800.5	55509.1	983.315	3277.31	7621.52	1.1358	0.0553006	0.880439	-0.183705
560	712	tr|F0JAD9|F0JAD9_AMBVA	N/A	N/A	Cytochrome b-c1 complex subunit 7 OS=Amblyomma variegatum PE=2 SV=1	TRUE	-4.385	0.00464	109475	140902	103777	140736	13459.6	4930.04	-31427.4	0.776956	-0.109604	1.28707	0.364096
561	607	tr|A0A131Z060|A0A131Z060_RHIAP	N/A	N/A	Superoxide dismutase OS=Rhipicephalus appendiculatus PE=3 SV=1	TRUE	4.38398	0.00465	185653	112282	186580	120511	3603.37	33277.8	73371	1.65345	0.218391	0.604796	-0.725481
562	850	tr|V5HUX3|V5HUX3_IXORI	N/A	N/A	Putative 60s ribosomal protein l38 OS=Ixodes ricinus PE=2 SV=1	TRUE	-4.38235	0.00466	137572	157523	136154	158945	5425.52	7311.87	-19950.5	0.873348	-0.0588125	1.14502	0.195371
563	777	tr|A0A023GF67|A0A023GF67_9ACAR	N/A	N/A	Ubiquitin carboxyl-terminal hydrolase OS=Amblyomma triste PE=2 SV=1	TRUE	4.35469	0.0048	20880.7	8980.69	21047.6	10821.9	794.709	5407.31	11900.1	2.32507	0.366436	0.430094	-1.21728
564	802	tr|G3MH64|G3MH64_9ACAR	N/A	N/A	Uncharacterized protein (Fragment) OS=Amblyomma maculatum PE=2 SV=1	TRUE	4.34174	0.00487	32886.8	26104.1	32012.6	25810.6	2156.69	2260.63	6782.63	1.25983	0.100312	0.793758	-0.333229
565	506	tr|L7M384|L7M384_9ACAR	N/A	N/A	Putative biotinidase and vanin OS=Rhipicephalus pulchellus PE=2 SV=1	TRUE	4.33315	0.00491	71647.3	62144.4	70773.9	61023.2	1862.98	3970.82	9502.88	1.15292	0.0617977	0.867366	-0.205288
566	830	tr|A0A224YJB0|A0A224YJB0_9ACAR	N/A	N/A	Uncharacterized protein OS=Rhipicephalus zambeziensis PE=4 SV=1	TRUE	4.32705	0.00494	23614	12737.4	23755.9	14074.2	2101.2	4567.07	10876.6	1.8539	0.268087	0.539402	-0.890567
567	450	tr|A0A224YTE8|A0A224YTE8_9ACAR	N/A	N/A	Methylmalonate-semialdehyde dehydrogenase OS=Rhipicephalus zambeziensis PE=4 SV=1	TRUE	4.32227	0.00497	100820	71886.3	102546	74717.7	4875.5	12469	28934	1.4025	0.146902	0.713014	-0.487998
568	729	tr|A0A131YYA7|A0A131YYA7_RHIAP	N/A	N/A	Leucyl-tRNA synthetase OS=Rhipicephalus appendiculatus PE=4 SV=1	TRUE	4.2638	0.0053	21687	5409.73	21924.5	2212.09	1657.75	7452.96	16277.3	4.00889	0.603024	0.249446	-2.0032
569	434	tr|L7M6B8|L7M6B8_9ACAR	N/A	N/A	Putative 26s proteasome regulatory complex subunit rpn11 OS=Rhipicephalus pulchellus PE=2 SV=1	TRUE	-4.24124	0.00543	30350.8	49889	33453.5	49589.4	8110.72	4370.78	-19538.2	0.608366	-0.215835	1.64375	0.716988
570	627	tr|A0A131XPC6|A0A131XPC6_9ACAR	N/A	N/A	Galectin OS=Hyalomma excavatum PE=2 SV=1	TRUE	-4.22545	0.00553	211263	232590	211448	233642	3691.28	9395.62	-21327.4	0.908305	-0.0417683	1.10095	0.138751
571	737	tr|G3MIA7|G3MIA7_9ACAR	N/A	N/A	Uncharacterized protein (Fragment) OS=Amblyomma maculatum PE=2 SV=1	TRUE	4.21636	0.00558	7288.1	2116.92	6940.77	2245.16	2326.48	777.372	5171.18	3.44279	0.53691	0.290462	-1.78358
572	41	tr|A0A131Z0E6|A0A131Z0E6_RHIAP	N/A	N/A	Aconitate hydratase, mitochondrial OS=Rhipicephalus appendiculatus PE=3 SV=1	TRUE	-4.21248	0.00561	44841.9	60059.3	45089.4	61703.1	5671.74	4475.56	-15217.4	0.746627	-0.126896	1.33936	0.42154
573	516	tr|A0A1E1XVS1|A0A1E1XVS1_9ACAR	N/A	N/A	Putative muscle m-line assembly protein unc-89 (Fragment) OS=Amblyomma sculptum PE=2 SV=1	TRUE	4.20831	0.00563	76528.4	55074.1	77227.5	54874.2	3197.64	9681.8	21454.3	1.38955	0.142876	0.719655	-0.474622
574	504	tr|L7M4S4|L7M4S4_9ACAR	N/A	N/A	Putative secreted protein OS=Rhipicephalus pulchellus PE=2 SV=1	TRUE	4.20271	0.00567	432983	368464	434142	361228	22816.8	20545.1	64519	1.1751	0.0700759	0.850989	-0.232787
575	399	tr|A0A224Z7X3|A0A224Z7X3_9ACAR	N/A	N/A	Vesicle fusing atpase 2 OS=Rhipicephalus zambeziensis PE=4 SV=1	TRUE	-4.1867	0.00577	12784.5	51331.7	10004.1	56494.3	11436.4	14432.2	-38547.2	0.249056	-0.603703	4.01516	2.00546
576	538	tr|A0A131Z420|A0A131Z420_RHIAP	N/A	N/A	Glutathione S-transferase OS=Rhipicephalus appendiculatus PE=4 SV=1	TRUE	4.17703	0.00583	56037.6	30475.9	54736	32914.8	4103.86	11530.6	25561.7	1.83875	0.264523	0.543848	-0.878726
577	331	tr|A0A131XL63|A0A131XL63_9ACAR	N/A	N/A	Putative 3-oxoacyl coa thiolase (Fragment) OS=Hyalomma excavatum PE=2 SV=1	TRUE	-4.10647	0.00631	12294.8	25470.3	13658.5	23726.1	4842.6	4210.29	-13175.5	0.482711	-0.316313	2.07163	1.05077
578	734	tr|A0A131XYD6|A0A131XYD6_IXORI	N/A	N/A	Isocitrate dehydrogenase [NAD] subunit, mitochondrial OS=Ixodes ricinus PE=2 SV=1	TRUE	-4.10068	0.00635	1293.5	9273.45	1227.78	9405.48	613.202	3843.4	-7979.95	0.139484	-0.855475	7.16927	2.84183
579	863	tr|A0A1E1WXY1|A0A1E1WXY1_9ACAR	N/A	N/A	Putative cuticle protein (Fragment) OS=Amblyomma aureolatum PE=2 SV=1	TRUE	4.095	0.00639	28723.1	23139.1	29393.3	23023.7	2381.92	1328.18	5583.93	1.24132	0.0938837	0.805594	-0.311875
580	810	tr|A0A224Z3V5|A0A224Z3V5_9ACAR	N/A	N/A	M7GpppX diphosphatase OS=Rhipicephalus zambeziensis PE=4 SV=1	TRUE	4.05257	0.00671	5436.77	1911.64	5458.61	1933.03	1702.6	357.363	3525.14	2.84404	0.453936	0.351613	-1.50794
581	556	tr|L7M765|L7M765_9ACAR	N/A	N/A	Dihydrolipoyl dehydrogenase OS=Rhipicephalus pulchellus PE=2 SV=1	TRUE	4.02409	0.00693	92276.7	75552.9	92046.4	72622.6	1765.68	8122.11	16723.8	1.22135	0.0868407	0.818765	-0.288479
582	460	tr|V5HKJ7|V5HKJ7_IXORI	N/A	N/A	Putative 40s ribosomal protein OS=Ixodes ricinus PE=2 SV=1	TRUE	-4.02103	0.00695	137680	155842	137826	157827	6022.84	6732.58	-18161.8	0.88346	-0.053813	1.13191	0.178763
583	456	tr|L7LTU7|L7LTU7_9ACAR	N/A	N/A	Putative methylenetetrahydrofolate dehydrogenase/methylenetetrahydrofolate cyclohydrolase OS=Rhipicephalus pulchellus PE=2 SV=1	TRUE	-4.00558	0.00707	113265	149840	114572	150400	9507.58	15592	-36575.2	0.755905	-0.121533	1.32292	0.403723
584	60	tr|A0A224YSR0|A0A224YSR0_9ACAR	N/A	N/A	Lipoprotein amino terminal region OS=Rhipicephalus zambeziensis PE=4 SV=1	TRUE	4.00167	0.00711	627927	161169	735492	161439	227360	52228.1	466758	3.89608	0.590628	0.256668	-1.96202
585	861	tr|A0A131XJ32|A0A131XJ32_9ACAR	N/A	N/A	Putative rna helicase OS=Hyalomma excavatum PE=2 SV=1	TRUE	3.99214	0.00718	17283.7	13218	17433.7	13116.9	1593.71	1268.41	4065.7	1.30759	0.116471	0.764767	-0.386907
586	722	tr|L7LUH3|L7LUH3_9ACAR	N/A	N/A	Uncharacterized protein OS=Rhipicephalus pulchellus PE=2 SV=1	TRUE	3.9582	0.00747	61427.4	44850.8	60378.5	45670.7	8066.86	2254.02	16576.7	1.3696	0.136592	0.730142	-0.45375
587	357	tr|A0A224ZBD7|A0A224ZBD7_9ACAR	N/A	N/A	UTP-glucose-1-phosphate uridylyltransferase OS=Rhipicephalus zambeziensis PE=4 SV=1	TRUE	-3.95188	0.00752	77679.4	113263	70531.4	114716	17067.5	5745.02	-35583.6	0.685832	-0.163782	1.45808	0.544073
588	377	tr|A0A224Y399|A0A224Y399_9ACAR	N/A	N/A	Dipeptidyl peptidase 3 OS=Rhipicephalus zambeziensis PE=3 SV=1	TRUE	3.91173	0.00788	63719.6	36751.5	63641	41859.4	3343.23	13376.9	26968.2	1.7338	0.238999	0.576768	-0.793937
589	871	tr|A0A224YS56|A0A224YS56_9ACAR	N/A	N/A	Proteasome subunit beta type OS=Rhipicephalus zambeziensis PE=3 SV=1	TRUE	3.89247	0.00805	82445.4	70849.8	83824.6	71298.7	4372.26	4047.25	11595.5	1.16366	0.0658274	0.859355	-0.218674
590	81	tr|A0A224Z4Y4|A0A224Z4Y4_9ACAR	N/A	N/A	Myosin regulatory light chain 12 OS=Rhipicephalus zambeziensis PE=4 SV=1	TRUE	3.86831	0.00828	560503	386441	537892	393016	63827.3	63442.7	174062	1.45042	0.161495	0.689454	-0.536474
591	906	tr|L7MFD7|L7MFD7_9ACAR	N/A	N/A	Putative ubiquilin-1 (Fragment) OS=Rhipicephalus pulchellus PE=2 SV=1	TRUE	3.86773	0.00829	9277.3	1473.81	9977.85	1530.26	4023.73	303.794	7803.5	6.29479	0.798982	0.158861	-2.65416
592	232	tr|L7M2H2|L7M2H2_9ACAR	N/A	N/A	Coronin OS=Rhipicephalus pulchellus PE=2 SV=1	TRUE	3.86402	0.00832	72445.3	52568.4	70142.4	55205.1	6498.32	7976.14	19876.9	1.37811	0.139285	0.725629	-0.462696
593	226	tr|L7M4H1|L7M4H1_9ACAR	N/A	N/A	Proteasome subunit alpha type OS=Rhipicephalus pulchellus PE=2 SV=1	TRUE	3.86287	0.00833	199524	169000	199346	170081	12707.9	9395.21	30524.1	1.18062	0.0721087	0.847015	-0.23954
594	695	tr|A0A034WXH1|A0A034WXH1_RHIMP	N/A	N/A	Vitellogenin 5 (Fragment) OS=Rhipicephalus microplus PE=4 SV=1	TRUE	3.8433	0.00853	27996.1	11452	27190.5	10875	2286.27	8300.16	16544	2.44464	0.388214	0.409059	-1.28962
595	308	tr|A0A224Z7D1|A0A224Z7D1_9ACAR	N/A	N/A	Pyruvate dehydrogenase E1 component beta subunit OS=Rhipicephalus zambeziensis PE=4 SV=1	TRUE	-3.83266	0.00863	45401.8	57957.8	46208.8	57859.1	2025.21	6231.22	-12555.9	0.783361	-0.106038	1.27655	0.352251
596	333	tr|A0A224Z4A2|A0A224Z4A2_9ACAR	N/A	N/A	Phosphoribosylformylglycinamidine synthase OS=Rhipicephalus zambeziensis PE=3 SV=1	TRUE	3.83183	0.00864	35624.3	20962.4	35160	20350.3	2951.24	7060.74	14661.9	1.69944	0.230306	0.588429	-0.765059
597	162	tr|A0A131Z4G4|A0A131Z4G4_RHIAP	N/A	N/A	Prohibitin 2 OS=Rhipicephalus appendiculatus PE=4 SV=1	TRUE	3.81055	0.00886	109726	81445.2	109836	75232.6	2336.77	14658.2	28280.5	1.34723	0.129443	0.742262	-0.429999
598	721	tr|L7MM52|L7MM52_9ACAR	N/A	N/A	Putative emp24/gp25l/p24 family of membrane trafficking (Fragment) OS=Rhipicephalus pulchellus PE=2 SV=1	TRUE	-3.8088	0.00888	12940.4	15601.9	13064.9	15249.3	1055.37	916.162	-2661.51	0.829411	-0.0812302	1.20567	0.269841
599	430	tr|L7M801|L7M801_9ACAR	N/A	N/A	Putative translocase of outer membrane 40 OS=Rhipicephalus pulchellus PE=2 SV=1	TRUE	-3.77325	0.00925	64508.9	78806.9	62529.3	80057.1	4564.28	6050.07	-14298.1	0.818568	-0.0869451	1.22165	0.288825
600	209	tr|G3MLA0|G3MLA0_9ACAR	N/A	N/A	Uncharacterized protein OS=Amblyomma maculatum PE=2 SV=1	TRUE	-3.7271	0.00977	142791	349240	146240	315446	10641.1	110270	-206449	0.408863	-0.388422	2.44581	1.29031
601	779	tr|A0A131YGD2|A0A131YGD2_RHIAP	N/A	N/A	Glycine rich superfamily member OS=Rhipicephalus appendiculatus PE=4 SV=1	TRUE	3.71733	0.00988	28394.5	10069.9	27868.7	8792.99	1219.53	9783.27	18324.6	2.81973	0.450208	0.354644	-1.49556
602	564	tr|C9W1B7|C9W1B7_RHISA	N/A	N/A	Cytochrome c oxidase subunit OS=Rhipicephalus sanguineus PE=2 SV=1	TRUE	-3.7151	0.00991	172296	181145	172321	181445	3231.56	3499.83	-8848.61	0.951152	-0.0217502	1.05136	0.0722525
603	732	tr|A0A224YSV1|A0A224YSV1_9ACAR	N/A	N/A	Alpha-L-fucosidase OS=Rhipicephalus zambeziensis PE=4 SV=1	TRUE	3.7103	0.00997	32797.9	13025.3	32723.2	12707.3	1209.26	10589.4	19772.6	2.51801	0.401058	0.397138	-1.33229
604	793	tr|L7MCR9|L7MCR9_9ACAR	N/A	N/A	Uncharacterized protein (Fragment) OS=Rhipicephalus pulchellus PE=2 SV=1	TRUE	3.66965	0.01046	19825.1	14184	19684.5	14248.2	2604.65	1633.47	5641.14	1.39771	0.145418	0.715455	-0.483067
605	414	tr|A0A131Z512|A0A131Z512_RHIAP	N/A	N/A	26S proteasome regulatory subunit N12 OS=Rhipicephalus appendiculatus PE=4 SV=1	TRUE	3.66248	0.01055	73934.7	44998.2	74608.8	49828.3	11059.2	11286.5	28936.5	1.64306	0.215653	0.608621	-0.716385
606	298	tr|L7M6U9|L7M6U9_9ACAR	N/A	N/A	Uncharacterized protein OS=Rhipicephalus pulchellus PE=2 SV=1	TRUE	-3.63591	0.01089	46504.6	65725.4	47609.8	64890.7	4381.7	9622.07	-19220.8	0.707559	-0.150237	1.41331	0.499077
607	243	tr|D0E0G4|D0E0G4_RHISA	N/A	N/A	Putative chitinase OS=Rhipicephalus sanguineus PE=2 SV=1	TRUE	3.63066	0.01096	124995	29098.3	124642	3651.88	2732.78	52755.2	95896.5	4.29561	0.633025	0.232796	-2.10286
608	886	tr|A0A224YWZ5|A0A224YWZ5_9ACAR	N/A	N/A	DnaJ-like protein subfamily A member 1 OS=Rhipicephalus zambeziensis PE=3 SV=1	TRUE	-3.59894	0.01138	43183.8	53294.5	44821.3	53060.4	5587.43	591.808	-10110.7	0.810287	-0.0913611	1.23413	0.303495
609	631	tr|L7M3R3|L7M3R3_9ACAR	N/A	N/A	Putative cargo transport protein OS=Rhipicephalus pulchellus PE=2 SV=1	TRUE	3.59671	0.01141	80420.1	72041.6	80089.3	72783.4	2592.71	3870.92	8378.5	1.1163	0.0477812	0.895816	-0.158726
610	647	tr|A0A131XD84|A0A131XD84_9ACAR	N/A	N/A	Putative thioredoxin-like protein OS=Hyalomma excavatum PE=2 SV=1	TRUE	3.57674	0.01169	26297.8	18676.7	25447.7	19334.5	3134.33	2887.23	7621.07	1.40805	0.148619	0.710201	-0.493701
611	246	tr|K7N8D7|K7N8D7_HAELO	N/A	N/A	Cuticular protein (Fragment) OS=Haemaphysalis longicornis PE=2 SV=1	TRUE	-3.43181	0.01394	1.14349e+06	1.54084e+06	1.24879e+06	1.54086e+06	229540	30590.4	-397350	0.742122	-0.129525	1.34749	0.430273
612	145	tr|A0A224Z6N2|A0A224Z6N2_9ACAR	N/A	N/A	Regulatory protein mlp OS=Rhipicephalus zambeziensis PE=4 SV=1	TRUE	3.41137	0.01429	3.925e+06	3.69291e+06	3.92774e+06	3.72013e+06	99025.9	93317.4	232088	1.06285	0.0264707	0.940869	-0.0879338
613	300	tr|A0A224YPE0|A0A224YPE0_9ACAR	N/A	N/A	Heat shock protein 90kDa beta OS=Rhipicephalus zambeziensis PE=3 SV=1	TRUE	3.40358	0.01443	78650.4	46760.9	83362.7	47474.8	17101.5	7660.31	31889.5	1.68197	0.225818	0.594542	-0.750151
614	468	tr|A0A131XF26|A0A131XF26_9ACAR	N/A	N/A	Dihydrolipoamide acetyltransferase component of pyruvate dehydrogenase complex OS=Hyalomma excavatum PE=2 SV=1	TRUE	-3.38492	0.01477	78866.7	102607	78436.8	101670	4583.17	13257.2	-23740.2	0.768629	-0.114283	1.30102	0.37964
615	332	tr|A0A224YDY6|A0A224YDY6_9ACAR	N/A	N/A	Cystatin-A/B OS=Rhipicephalus zambeziensis PE=4 SV=1	TRUE	3.37987	0.01486	40554.7	17445.1	40097.1	16787.2	3261.56	13280.2	23109.6	2.32471	0.366368	0.430162	-1.21705
616	879	tr|Q7YW74|Q7YW74_9ACAR	N/A	N/A	Cathepsin L-like cysteine proteinase B OS=Rhipicephalus haemaphysaloides haemaphysaloides GN=CysB PE=2 SV=1	TRUE	-3.37927	0.01487	32923	39136.3	33931.8	37987.8	2401.15	2785.11	-6213.25	0.841241	-0.0750798	1.18872	0.24941
617	576	tr|Q86G64|Q86G64_DERVA	N/A	N/A	40S ribosomal protein S5 OS=Dermacentor variabilis PE=2 SV=1	TRUE	-3.37453	0.01496	88121.9	245305	85690	285847	27757.6	88927.1	-157183	0.359234	-0.444622	2.7837	1.477
618	78	tr|L7LRH1|L7LRH1_9ACAR	N/A	N/A	Putative glycine rich protein OS=Rhipicephalus pulchellus PE=2 SV=1	TRUE	-3.37387	0.01497	1.65806e+06	2.35186e+06	1.55664e+06	2.48883e+06	256029	321870	-693801	0.704999	-0.151812	1.41844	0.504308
619	405	tr|A0A131XJ33|A0A131XJ33_9ACAR	N/A	N/A	Putative ubiquinone oxidoreductase ndufa5/b13 subunit OS=Hyalomma excavatum PE=2 SV=1	TRUE	-3.36289	0.01518	120352	134945	117823	134464	8341.52	2395.86	-14592.9	0.891861	-0.049703	1.12125	0.16511
620	895	tr|G3MMB0|G3MMB0_9ACAR	N/A	N/A	S-(hydroxymethyl)glutathione dehydrogenase OS=Amblyomma maculatum PE=2 SV=1	TRUE	3.3585	0.01526	16067.5	10859.5	15946.6	10995.8	458.924	3067.21	5207.95	1.47957	0.170137	0.67587	-0.565182
621	503	tr|L7M666|L7M666_9ACAR	N/A	N/A	Putative small nuclear ribonucleoprotein sm d3 OS=Rhipicephalus pulchellus PE=2 SV=1	TRUE	3.35175	0.01539	148502	127989	148362	127522	8878.98	8425.84	20513.6	1.16028	0.0645615	0.861863	-0.214469
622	611	tr|C9W1M1|C9W1M1_RHISA	N/A	N/A	Mitochondrial ATP synthase epsilon chain OS=Rhipicephalus sanguineus PE=2 SV=1	TRUE	3.306	0.01629	126749	108402	128337	110253	3388.73	10569	18346.7	1.16925	0.067906	0.855252	-0.225579
623	702	tr|A0A224YY37|A0A224YY37_9ACAR	N/A	N/A	Ribose-phosphate pyrophosphokinase OS=Rhipicephalus zambeziensis PE=3 SV=1	TRUE	-3.30556	0.01629	26316.8	30642.4	26576.6	30882.3	1390.24	2217.45	-4325.68	0.858834	-0.066091	1.16437	0.219549
624	529	tr|F1Q0R0|F1Q0R0_CANLF	N/A	N/A	Keratin 14 OS=Canis lupus familiaris GN=KRT14 PE=3 SV=2	TRUE	-3.28764	0.01666	18509.4	44204.6	18642.4	44522.7	14572.6	5654.96	-25695.2	0.418722	-0.378074	2.38822	1.25593
625	500	tr|L7ML89|L7ML89_9ACAR	N/A	N/A	40S ribosomal protein S26 (Fragment) OS=Rhipicephalus pulchellus PE=2 SV=1	TRUE	-3.28435	0.01673	205762	326383	223605	324003	72323	12829.1	-120621	0.630431	-0.200363	1.58622	0.665591
626	274	tr|V5HZY4|V5HZY4_IXORI	N/A	N/A	Putative transcriptional activator protein (Fragment) OS=Ixodes ricinus PE=2 SV=1	TRUE	-3.27491	0.01693	68918	80632.2	68378.1	82779.1	4848.36	5260.42	-11714.2	0.85472	-0.0681759	1.16997	0.226475
627	613	tr|L7M9J6|L7M9J6_9ACAR	N/A	N/A	Coatomer subunit beta' OS=Rhipicephalus pulchellus PE=2 SV=1	TRUE	3.27289	0.01697	23412.3	18624.4	24200.3	18578	2383.4	1696.92	4787.85	1.25707	0.0993607	0.795498	-0.330069
628	233	tr|A0A131YLT1|A0A131YLT1_RHIAP	N/A	N/A	Myosin-light-chain kinase OS=Rhipicephalus appendiculatus PE=3 SV=1	TRUE	3.2722	0.01699	283371	212259	284750	218321	11116.9	42018.6	71112	1.33502	0.125489	0.74905	-0.416866
629	559	tr|A0A224YXN2|A0A224YXN2_9ACAR	N/A	N/A	Ras-related protein Rab-1A OS=Rhipicephalus zambeziensis PE=4 SV=1	TRUE	3.26512	0.01714	19222.7	7154.97	18939.2	7044.54	1914.61	7139.64	12067.7	2.68662	0.429206	0.372215	-1.42579
630	704	tr|L7MJC4|L7MJC4_9ACAR	N/A	N/A	Putative paxillin (Fragment) OS=Rhipicephalus pulchellus PE=2 SV=1	TRUE	-3.25677	0.01732	39871.2	51801.8	41052.2	49250.1	4217.65	5990.93	-11930.6	0.769688	-0.113686	1.29923	0.377655
631	680	tr|A0A1E1X5I9|A0A1E1X5I9_9ACAR	N/A	N/A	Putative fumarylacetoacetase OS=Amblyomma aureolatum PE=2 SV=1	TRUE	3.25418	0.01738	1930.23	802.825	1838.47	785.392	567.207	397.971	1127.4	2.40429	0.380988	0.415922	-1.26561
632	223	tr|L7M861|L7M861_9ACAR	N/A	N/A	Putative tropomodulin OS=Rhipicephalus pulchellus PE=2 SV=1	TRUE	3.24576	0.01756	247864	204069	247740	210973	5329.73	26454.1	43794.5	1.21461	0.0844353	0.823312	-0.280488
633	605	tr|A0A224ZB69|A0A224ZB69_9ACAR	N/A	N/A	Tripeptidyl-peptidase II OS=Rhipicephalus zambeziensis PE=4 SV=1	TRUE	3.21874	0.01817	21308.7	10880.3	22158.2	12281.5	2586.12	5941.36	10428.4	1.95846	0.291916	0.510604	-0.969722
634	445	tr|L7MAH9|L7MAH9_9ACAR	N/A	N/A	Succinyl-CoA:3-ketoacid-coenzyme A transferase OS=Rhipicephalus pulchellus PE=2 SV=1	TRUE	3.21276	0.0183	68122.2	57454.9	67004.4	59329.4	2849.13	5998.33	10667.3	1.18566	0.0739617	0.843409	-0.245695
635	20	tr|A0A131YGT1|A0A131YGT1_RHIAP	N/A	N/A	Myosin heavy chain 6/7 OS=Rhipicephalus appendiculatus PE=3 SV=1	TRUE	-3.1906	0.01882	159221	182237	158150	179504	5549.45	13317.2	-23015.7	0.873704	-0.0586356	1.14455	0.194783
636	114	tr|A0A224Z5F6|A0A224Z5F6_9ACAR	N/A	N/A	Vinculin OS=Rhipicephalus zambeziensis PE=4 SV=1	TRUE	3.15487	0.01969	261229	201599	260820	195035	5079.25	37459.1	59630	1.29579	0.112533	0.771733	-0.373827
637	287	tr|A0A023FKF7|A0A023FKF7_9ACAR	N/A	N/A	Aconitate hydratase, mitochondrial OS=Amblyomma cajennense PE=2 SV=1	TRUE	-3.13509	0.02019	140597	211306	136910	208561	10703.8	43819.4	-70708.6	0.665373	-0.176935	1.50292	0.587764
638	280	tr|A0A224YUJ1|A0A224YUJ1_9ACAR	N/A	N/A	Calcium-binding mitochondrial carrier protein Aralar1 OS=Rhipicephalus zambeziensis PE=3 SV=1	TRUE	-3.0961	0.02122	125894	165397	125977	171028	18329.7	17753.7	-39503.3	0.761161	-0.118524	1.31378	0.393727
639	547	tr|A0A224YS01|A0A224YS01_9ACAR	N/A	N/A	Alpha-B-crystallin OS=Rhipicephalus zambeziensis PE=3 SV=1	TRUE	3.07769	0.02173	67395.6	32094.1	73373.2	28295.8	19055.9	12772.1	35301.5	2.09994	0.322206	0.476205	-1.07035
640	675	tr|L7M7C9|L7M7C9_9ACAR	N/A	N/A	Putative ras-related protein OS=Rhipicephalus pulchellus PE=2 SV=1	TRUE	-3.0524	0.02244	29856.6	31902.9	29909.2	31785.6	802.474	1074.08	-2046.25	0.93586	-0.0287891	1.06854	0.0956353
641	148	tr|L7M5J9|L7M5J9_9ACAR	N/A	N/A	Putative electron transfer flavoprotein alpha subunit OS=Rhipicephalus pulchellus PE=2 SV=1	TRUE	3.02885	0.02313	266777	235892	270151	232664	15058.5	13753.8	30885.5	1.13093	0.0534361	0.884227	-0.177511
642	717	tr|A0A131XQF1|A0A131XQF1_9ACAR	N/A	N/A	Putative electron transfer flavoprotein ubiquinone oxidoreductase (Fragment) OS=Hyalomma excavatum PE=2 SV=1	TRUE	-3.00787	0.02377	12761	26392.1	14601.6	26244.1	8927.65	1564.23	-13631.1	0.483515	-0.31559	2.06819	1.04837
643	268	tr|L7LWF2|L7LWF2_9ACAR	N/A	N/A	Putative nadh:ubiquinone oxidoreductase ndufs2/49 kDa subunit OS=Rhipicephalus pulchellus PE=2 SV=1	TRUE	-3.0071	0.02379	82240.7	106620	83223.4	107394	7489.26	14381	-24379	0.771346	-0.112751	1.29644	0.37455
644	619	tr|A0A131YUN4|A0A131YUN4_RHIAP	N/A	N/A	Glutamate synthase (NADPH/NADH) OS=Rhipicephalus appendiculatus PE=4 SV=1	TRUE	-3.007	0.02379	30293.9	35009.6	29483.9	35466.5	2862.1	1282.84	-4715.65	0.865304	-0.0628314	1.15566	0.208721
645	415	tr|Q8MTY1|Q8MTY1_RHIAP	N/A	N/A	Putative cement protein RIM36 OS=Rhipicephalus appendiculatus GN=RIM36 PE=2 SV=1	TRUE	-3.00078	0.02398	335495	3.37677e+06	342528	4.32189e+06	24912.4	2.02684e+06	-3.04127e+06	0.0993539	-1.00282	10.065	3.33128
646	638	tr|L7M437|L7M437_9ACAR	N/A	N/A	Proteasome subunit beta type OS=Rhipicephalus pulchellus PE=2 SV=1	TRUE	-2.99802	0.02407	27497.3	35979.6	27295.8	34416.9	3286.56	4606.27	-8482.22	0.764249	-0.116765	1.30847	0.387885
647	524	tr|L7M3V3|L7M3V3_9ACAR	N/A	N/A	Putative glutathione s-transferase OS=Rhipicephalus pulchellus PE=2 SV=1	TRUE	2.98713	0.02441	177267	59533.3	141584	59608.5	78804.2	1920.35	117734	2.97762	0.473869	0.335839	-1.57416
648	778	tr|A0A224YS66|A0A224YS66_9ACAR	N/A	N/A	E3 SUMO-protein ligase RanBP2 OS=Rhipicephalus zambeziensis PE=4 SV=1	TRUE	-2.98422	0.0245	3144.86	8109.21	3540.84	7252.43	1011.69	3169.53	-4964.36	0.387813	-0.411378	2.57856	1.36657
649	851	tr|L7MJQ0|L7MJQ0_9ACAR	N/A	N/A	Serine hydroxymethyltransferase (Fragment) OS=Rhipicephalus pulchellus PE=2 SV=1	TRUE	2.944	0.02581	28604	22514.6	29398.7	23501.3	3266.75	2537.99	6089.37	1.27046	0.103962	0.787115	-0.345354
650	693	tr|A0A023FKJ8|A0A023FKJ8_9ACAR	N/A	N/A	Putative ca2+/calmodulin-dependent protein (Fragment) OS=Amblyomma cajennense PE=2 SV=1	TRUE	-2.94143	0.0259	4322.01	7526	4903.13	7572.3	1262.37	1775.49	-3203.99	0.574277	-0.240879	1.74132	0.800181
651	687	tr|A0A224YW23|A0A224YW23_9ACAR	N/A	N/A	Poly [ADP-ribose] polymerase OS=Rhipicephalus zambeziensis PE=4 SV=1	TRUE	2.92696	0.02639	30162.6	26888.5	29927.6	26534.7	2015.01	971.995	3274.09	1.12177	0.049902	0.891452	-0.165771
652	387	tr|L7MHR9|L7MHR9_9ACAR	N/A	N/A	Putative 60s ribosomal protein l23 (Fragment) OS=Rhipicephalus pulchellus PE=2 SV=1	TRUE	-2.92296	0.02653	205220	242367	213402	238609	21051.4	14244.3	-37147.5	0.846731	-0.0722547	1.18101	0.240025
653	381	tr|L7LSI2|L7LSI2_9ACAR	N/A	N/A	Putative lysine-ketoglutarate reductase/saccharopine dehydrogenase OS=Rhipicephalus pulchellus PE=2 SV=1	TRUE	-2.872	0.02835	63620.7	87198.2	65036.5	89450.1	12840	10233	-23577.5	0.72961	-0.136909	1.37059	0.454802
654	710	tr|A0A224Z0L0|A0A224Z0L0_9ACAR	N/A	N/A	Histone H1/5 OS=Rhipicephalus zambeziensis PE=3 SV=1	TRUE	2.8461	0.02933	107473	98532.1	108362	99733.1	3579.76	5163.24	8940.76	1.09074	0.037721	0.916809	-0.125307
655	100	tr|A0A131XR05|A0A131XR05_9ACAR	N/A	N/A	Putative 60s ribosomal protein l4 (Fragment) OS=Hyalomma excavatum PE=2 SV=1	TRUE	-2.83063	0.02993	847727	1.17449e+06	844454	1.15834e+06	16053.9	230315	-326760	0.721785	-0.141592	1.38545	0.470359
656	639	tr|L7M5Q2|L7M5Q2_9ACAR	N/A	N/A	Putative vamp vesicle-associated membrane protein-associated protein a OS=Rhipicephalus pulchellus PE=2 SV=1	TRUE	-2.81807	0.03043	45941.2	56824.8	45918.6	56459.1	4293.71	6420.75	-10883.6	0.808471	-0.0923354	1.2369	0.306731
657	47	tr|A0A131YVP0|A0A131YVP0_RHIAP	N/A	N/A	Spectrin beta chain OS=Rhipicephalus appendiculatus PE=3 SV=1	TRUE	-2.81023	0.03075	258871	294235	264035	292105	16582.6	18931.9	-35363.2	0.879813	-0.0556097	1.13661	0.184731
658	887	tr|A0A1E1XI57|A0A1E1XI57_9ACAR	N/A	N/A	Annexin (Fragment) OS=Amblyomma aureolatum PE=2 SV=1	TRUE	2.79133	0.03152	31802	17884.5	33064.6	21752.8	3865.75	9192.15	13917.5	1.77819	0.249977	0.56237	-0.830407
659	697	tr|L7MFR3|L7MFR3_9ACAR	N/A	N/A	Putative carbonic anhydrase (Fragment) OS=Rhipicephalus pulchellus PE=2 SV=1	TRUE	2.75823	0.03293	50362.8	42905.7	50431.5	42466.9	4557.21	2910.28	7457.15	1.1738	0.0695954	0.851931	-0.231191
660	772	tr|L7M6B6|L7M6B6_9ACAR	N/A	N/A	Histone H3 OS=Rhipicephalus pulchellus PE=2 SV=1	TRUE	-2.73074	0.03415	1497.64	10330.6	1458.15	13280.8	402.92	6456.72	-8832.96	0.144971	-0.838719	6.89793	2.78616
661	217	tr|A0A224YHD4|A0A224YHD4_9ACAR	N/A	N/A	Amblyomma 40 33 family member OS=Rhipicephalus zambeziensis PE=4 SV=1	TRUE	-2.71709	0.03478	188217	212954	189568	212098	7458.75	16610.6	-24737	0.883839	-0.0536269	1.13143	0.178145
662	181	tr|C9W1T0|C9W1T0_RHISA	N/A	N/A	Secreted protein (Fragment) OS=Rhipicephalus sanguineus PE=2 SV=1	TRUE	2.70991	0.03511	3.14404e+06	552283	3.91693e+06	315493	1.8369e+06	533478	2.59176e+06	5.69281	0.755327	0.17566	-2.50914
663	573	tr|A0A1E1XM49|A0A1E1XM49_9ACAR	N/A	N/A	Putative netrin axonal chemotropic factor (Fragment) OS=Amblyomma sculptum PE=2 SV=1	TRUE	2.70951	0.03513	105428	98389.2	104237	98129	2707.43	4434.14	7038.44	1.07154	0.030007	0.933239	-0.0996812
664	133	tr|A0A224Z298|A0A224Z298_9ACAR	N/A	N/A	Isocitrate dehydrogenase [NAD] subunit, mitochondrial OS=Rhipicephalus zambeziensis PE=3 SV=1	TRUE	-2.6908	0.03601	317920	359815	318693	361063	20309.5	23604.4	-41894.6	0.883566	-0.0537609	1.13178	0.17859
665	282	tr|L7M227|L7M227_9ACAR	N/A	N/A	T-complex protein 1 subunit gamma OS=Rhipicephalus pulchellus PE=2 SV=1	TRUE	-2.66101	0.03747	49207.5	60010.5	48939.3	59341.7	4932.05	6449.83	-10803	0.819982	-0.0861958	1.21954	0.286336
666	184	tr|A0A224Z543|A0A224Z543_9ACAR	N/A	N/A	NADH dehydrogenase (Ubiquinone) Fe-S protein 3 OS=Rhipicephalus zambeziensis PE=3 SV=1	TRUE	2.65798	0.03763	42212.2	30897.7	43493.3	30003.2	3355.57	7824.37	11314.4	1.36619	0.135511	0.731963	-0.450158
667	467	tr|A0A224Z7N5|A0A224Z7N5_9ACAR	N/A	N/A	40S ribosomal protein S21 OS=Rhipicephalus zambeziensis PE=3 SV=1	TRUE	-2.64161	0.03846	12338.9	17228.7	12116.4	16386.6	1861.99	3199.81	-4889.8	0.716182	-0.144977	1.39629	0.481602
668	822	tr|A0A0C7D6V6|A0A0C7D6V6_9RICK	N/A	N/A	Phosphomethylpyrimidine synthase OS=Ehrlichia minasensis OX=1242993 GN=thiC PE=3 SV=1	TRUE	-2.63602	0.03875	5864.18	8987.53	5795.98	8459.64	435.729	2329.35	-3123.35	0.65248	-0.185433	1.53261	0.615995
669	872	tr|A0A131XNZ1|A0A131XNZ1_9ACAR	N/A	N/A	Putative m20 peptidase aminoacylase 1-like protein 2 (Fragment) OS=Hyalomma excavatum PE=2 SV=1	TRUE	2.62567	0.03929	12153.1	3442.46	14212.4	3227.57	6489.25	1383	8710.65	3.53036	0.547819	0.283257	-1.81982
670	149	tr|A0A224Z4T4|A0A224Z4T4_9ACAR	N/A	N/A	Sodium/potassium-transporting ATPase subunit beta OS=Rhipicephalus zambeziensis PE=4 SV=1	TRUE	-2.5908	0.04117	1.36864e+06	1.71385e+06	1.37473e+06	1.80824e+06	28865.4	264926	-345217	0.798573	-0.0976855	1.25223	0.324504
671	172	tr|A0A224YL20|A0A224YL20_9ACAR	N/A	N/A	Determination of adult lifespan OS=Rhipicephalus zambeziensis PE=4 SV=1	TRUE	2.58923	0.04125	999282	753771	998473	835794	16626.7	188910	245511	1.32571	0.122449	0.754312	-0.406766
672	183	tr|A0A131YXB7|A0A131YXB7_RHIAP	N/A	N/A	Transketolase OS=Rhipicephalus appendiculatus PE=4 SV=1	TRUE	2.57661	0.04196	322814	250745	324219	251421	53971	14715.3	72069.4	1.28742	0.109721	0.776746	-0.364484
673	424	tr|A0A224YSF8|A0A224YSF8_9ACAR	N/A	N/A	Large subunit ribosomal protein L31e OS=Rhipicephalus zambeziensis PE=4 SV=1	TRUE	2.57466	0.04207	131453	120229	129396	119883	5969.8	6355.05	11224.6	1.09336	0.0387632	0.914612	-0.128769
674	492	tr|A0A023FIT8|A0A023FIT8_9ACAR	N/A	N/A	Putative myosin regulatory light chain ixodes scapularis myosin regulatory light chain (Fragment) OS=Amblyomma cajennense PE=2 SV=1	TRUE	-2.53619	0.04431	269089	510327	176451	510478	189821	12567.1	-241238	0.527287	-0.277953	1.8965	0.92334
675	891	tr|A0A023GJ32|A0A023GJ32_9ACAR	N/A	N/A	Ribosomal protein L19 OS=Amblyomma triste PE=2 SV=1	TRUE	-2.48148	0.04771	3689.41	16360.5	3634.31	18949.3	1842.31	10045	-12671.1	0.225507	-0.646839	4.43445	2.14875
676	464	tr|B5ABL8|B5ABL8_DERVA	N/A	N/A	Hemelipoglycoprotein 2 (Fragment) OS=Dermacentor variabilis PE=2 SV=1	TRUE	2.46537	0.04876	1.20207e+06	480398	1.20068e+06	193177	44954.4	583718	721671	2.50224	0.398328	0.399643	-1.32322
677	839	tr|A0A224YEL2|A0A224YEL2_9ACAR	N/A	N/A	Glycine rich superfamily member OS=Rhipicephalus zambeziensis PE=4 SV=1	TRUE	-2.45488	0.04946	6966.28	14602.3	6052.7	14821.6	5764.38	2339.66	-7636.01	0.477068	-0.32142	2.09614	1.06773
678	553	tr|A0A1E1XM95|A0A1E1XM95_9ACAR	N/A	N/A	Putative cytoskeletal regulator flightless-i (Fragment) OS=Amblyomma sculptum PE=2 SV=1	TRUE	2.43221	0.05101	32837.8	18173.7	32939.1	21347.5	2226.86	11850.8	14664.1	1.80688	0.25693	0.553439	-0.853503
679	741	tr|A0A131XK53|A0A131XK53_9ACAR	N/A	N/A	ATP synthase subunit beta (Fragment) OS=Hyalomma excavatum PE=2 SV=1	TRUE	-2.42405	0.05158	2027.76	11065.7	2113.03	11006	1365.22	7330.85	-9037.94	0.183247	-0.736963	5.45711	2.44814
680	723	tr|A0A224Z7Y4|A0A224Z7Y4_9ACAR	N/A	N/A	Ribosomal protein l37a OS=Rhipicephalus zambeziensis PE=3 SV=1	TRUE	-2.40867	0.05267	54758.1	59864.9	54819.3	60892.9	2296.84	3564.49	-5106.87	0.914693	-0.0387244	1.09326	0.12864
681	834	tr|A0A131YJV2|A0A131YJV2_RHIAP	N/A	N/A	PDZ and LIM domain protein Zasp OS=Rhipicephalus appendiculatus PE=4 SV=1	TRUE	2.40226	0.05313	46282.5	25831.4	45840.4	25991	17012.1	701.127	20451.1	1.79171	0.253268	0.558125	-0.84134
682	115	tr|L7M7N7|L7M7N7_9ACAR	N/A	N/A	Aspartate aminotransferase OS=Rhipicephalus pulchellus PE=2 SV=1	TRUE	-2.39623	0.05357	4573.67	13968.4	4477.75	14916.9	1651.09	7665.43	-9394.68	0.327431	-0.48488	3.05408	1.61074
683	305	tr|A0A224Z940|A0A224Z940_9ACAR	N/A	N/A	Thioredoxin OS=Rhipicephalus zambeziensis PE=3 SV=1	TRUE	2.39521	0.05364	52023	43939	51955.8	44514.6	6251.16	2547.15	8084.07	1.18398	0.0733458	0.844606	-0.24365
684	372	tr|A0A224YWJ2|A0A224YWJ2_9ACAR	N/A	N/A	Peptidylprolyl isomerase OS=Rhipicephalus zambeziensis PE=4 SV=1	TRUE	2.39156	0.05391	409975	402726	410690	404391	4769.28	3741.66	7248.63	1.018	0.00774731	0.982319	-0.025736
685	656	tr|A0A131XEE1|A0A131XEE1_9ACAR	N/A	N/A	Putative nadh-ubiquinone oxidoreductase subunit ndufb10/pdsw OS=Hyalomma excavatum PE=2 SV=1	TRUE	-2.38819	0.05416	53794.2	91962.8	59210.8	104676	11594.6	29787.5	-38168.6	0.584956	-0.232877	1.70953	0.773599
686	486	tr|C9W1H9|C9W1H9_RHISA	N/A	N/A	NADH dehydrogenase 1 alpha subcomplex OS=Rhipicephalus sanguineus PE=2 SV=1	TRUE	-2.37538	0.05511	131980	138943	131993	138011	2027.57	5501.11	-6963.27	0.949884	-0.0223295	1.05276	0.0741768
687	439	tr|A0A224ZBY8|A0A224ZBY8_9ACAR	N/A	N/A	Vitellogenin 3 OS=Rhipicephalus zambeziensis PE=4 SV=1	TRUE	2.36912	0.05559	100623	89681.8	98722.6	88714.4	6128.14	6911.2	10941.6	1.122	0.0499946	0.891262	-0.166078
688	219	tr|A0A1E1X6J1|A0A1E1X6J1_9ACAR	N/A	N/A	Putative titin (Fragment) OS=Amblyomma aureolatum PE=2 SV=1	TRUE	2.36857	0.05563	114422	85106.8	113462	82805.4	7515.74	23584.8	29315.1	1.34445	0.128545	0.743798	-0.427017
689	828	tr|L7M3Z2|L7M3Z2_9ACAR	N/A	N/A	Putative rna polymerase ii transcription elongation factor elongin/siii subunit elongin b OS=Rhipicephalus pulchellus PE=2 SV=1	TRUE	2.36364	0.05601	20935.4	11368.4	20761	10490.9	7455.21	3154.55	9566.99	1.84154	0.265182	0.543022	-0.880917
690	531	tr|A0A131XI00|A0A131XI00_9ACAR	N/A	N/A	Putative enoyl-coa hydratase OS=Hyalomma excavatum PE=2 SV=1	TRUE	2.35535	0.05664	91227.6	84235	92752.4	84805.7	3725.74	4623.3	6992.65	1.08301	0.0346339	0.923349	-0.115051
691	877	tr|A0A023FHU4|A0A023FHU4_9ACAR	N/A	N/A	Annexin (Fragment) OS=Amblyomma cajennense PE=2 SV=1	TRUE	2.35333	0.0568	45284	20685	41846.9	21156.1	12163.8	17002.7	24599	2.18922	0.34029	0.456783	-1.13042
692	709	tr|A0A224YNE1|A0A224YNE1_9ACAR	N/A	N/A	Gluconolactonase OS=Rhipicephalus zambeziensis PE=4 SV=1	TRUE	2.34649	0.05733	53646.8	26481.9	54287.2	24690.9	1695.13	23091.5	27164.9	2.02579	0.306594	0.493635	-1.01848
693	158	tr|L7M0S5|L7M0S5_9ACAR	N/A	N/A	Glycerol-3-phosphate dehydrogenase OS=Rhipicephalus pulchellus PE=2 SV=1	TRUE	-2.34386	0.05754	135687	175428	141788	175469	23830.9	24125.5	-39741.2	0.773461	-0.111561	1.29289	0.370599
694	199	tr|L7LYA7|L7LYA7_9ACAR	N/A	N/A	Putative 26s proteasome regulatory complex atpase rpt2 OS=Rhipicephalus pulchellus PE=2 SV=1	TRUE	-2.33549	0.0582	162560	177468	163707	179173	4437.46	11970.4	-14908	0.915996	-0.0381063	1.09171	0.126586
695	626	tr|B7PQE0|B7PQE0_IXOSC	N/A	N/A	Coatomer, alpha chain, putative (Fragment) OS=Ixodes scapularis GN=8053192 PE=4 SV=1	TRUE	2.30841	0.0604	22627.5	18283.2	22835.8	17974.2	1469.11	3465.3	4344.25	1.23761	0.0925834	0.80801	-0.307555
696	248	tr|A0A224Z0I5|A0A224Z0I5_9ACAR	N/A	N/A	T-complex protein 1 subunit theta OS=Rhipicephalus zambeziensis PE=3 SV=1	TRUE	-2.30788	0.06044	25477.5	37164.5	25342.1	37527.8	3175.54	9617.23	-11687.1	0.685532	-0.163972	1.45872	0.544704
697	590	tr|L7M2D0|L7M2D0_9ACAR	N/A	N/A	Putative mitochondrial chaperonin OS=Rhipicephalus pulchellus PE=2 SV=1	TRUE	-2.28034	0.06277	60588.6	75825.2	63039.1	75835.4	9049.81	9832.7	-15236.6	0.799057	-0.0974225	1.25148	0.323631
698	327	tr|L7M5K4|L7M5K4_9ACAR	N/A	N/A	Putative chloride intracellular channel 6-like protein OS=Rhipicephalus pulchellus PE=2 SV=1	TRUE	2.26744	0.06389	137991	126718	137605	126640	5290.59	8419.06	11273	1.08896	0.0370125	0.918306	-0.122953
699	609	tr|A0A131YW70|A0A131YW70_RHIAP	N/A	N/A	Crystallin, alpha B OS=Rhipicephalus appendiculatus PE=3 SV=1	TRUE	-2.25456	0.06503	21783.4	31276.4	23284.4	32212	7904.47	2904.17	-9492.92	0.696482	-0.15709	1.43579	0.521841
700	876	tr|A0A131XL84|A0A131XL84_9ACAR	N/A	N/A	Putative adenosine monophosphate deaminase (Fragment) OS=Hyalomma excavatum PE=2 SV=1	TRUE	-2.23777	0.06655	3933.04	17418.4	3911.3	19000.5	1773.67	11921.3	-13485.4	0.225798	-0.646281	4.42875	2.1469
701	57	tr|L7LXL4|L7LXL4_9ACAR	N/A	N/A	Inosine-5'-monophosphate dehydrogenase OS=Rhipicephalus pulchellus PE=2 SV=1	TRUE	2.22923	0.06734	1.04893e+06	981389	1.03357e+06	994475	51757.2	31517.1	67543.5	1.06882	0.0289064	0.935607	-0.0960248
702	769	tr|A0A023FLD4|A0A023FLD4_9ACAR	N/A	N/A	Putative acetyl-coa acetyltransferase OS=Amblyomma cajennense PE=2 SV=1	TRUE	2.19878	0.07022	82705.4	65851.6	78893.4	66118.5	14994.4	3190.94	16853.9	1.25594	0.0989681	0.796218	-0.328765
703	753	tr|L7M5P4|L7M5P4_9ACAR	N/A	N/A	Putative prohibitin-like protein OS=Rhipicephalus pulchellus PE=2 SV=1	TRUE	2.19775	0.07032	62456	50388.4	63128.2	51877.5	9610.44	5313.94	12067.6	1.23949	0.0932433	0.806783	-0.309747
704	337	tr|L7M7I7|L7M7I7_9ACAR	N/A	N/A	Putative alkyl hydroperoxide reductase thiol specific antioxidant OS=Rhipicephalus pulchellus PE=2 SV=1	TRUE	-2.17072	0.07299	143434	155220	141153	156286	9421.46	5398.09	-11785.2	0.924074	-0.0342933	1.08216	0.11392
705	815	tr|A0A224YDZ8|A0A224YDZ8_9ACAR	N/A	N/A	Replication factor A3 OS=Rhipicephalus zambeziensis PE=4 SV=1	TRUE	2.16305	0.07377	9813.99	6184.29	9734.49	4769.42	1204.4	3132.53	3629.7	1.58692	0.200556	0.630151	-0.666231
706	768	tr|E2R917|E2R917_CANLF	N/A	N/A	Keratin 75 OS=Canis lupus familiaris GN=KRT75 PE=3 SV=2	TRUE	-2.16164	0.07391	13847.3	43890.5	13835.5	53450.1	13029.3	24553.8	-30043.2	0.315496	-0.501006	3.16961	1.6643
707	242	tr|A0A131Z580|A0A131Z580_RHIAP	N/A	N/A	Aldehyde dehydrogenase family 7 member A1 OS=Rhipicephalus appendiculatus PE=3 SV=1	TRUE	-2.14901	0.07521	202099	221318	204855	225414	8227.76	15881.8	-19219.1	0.913161	-0.0394528	1.0951	0.131059
708	630	tr|A0A224YI64|A0A224YI64_9ACAR	N/A	N/A	ATP-dependent RNA helicase DDX1 OS=Rhipicephalus zambeziensis PE=4 SV=1	TRUE	-2.14322	0.07581	4363.12	6973.3	4710.2	6811.23	1419.66	1979.26	-2610.17	0.62569	-0.203641	1.59824	0.67648
709	686	tr|L7LXM0|L7LXM0_9ACAR	N/A	N/A	Uncharacterized protein OS=Rhipicephalus pulchellus PE=2 SV=1	TRUE	2.11474	0.07885	14311.2	7398.63	14457.3	6633.83	1811.08	6281.62	6912.54	1.9343	0.286524	0.516983	-0.951811
710	262	tr|L7MFA9|L7MFA9_9ACAR	N/A	N/A	Putative 40s ribosomal protein s2 (Fragment) OS=Rhipicephalus pulchellus PE=2 SV=1	TRUE	2.09864	0.08063	502050	465633	490486	458880	31372.9	14839.1	36417	1.07821	0.0327032	0.927463	-0.108638
711	374	tr|L7M8J0|L7M8J0_9ACAR	N/A	N/A	Uncharacterized protein OS=Rhipicephalus pulchellus PE=2 SV=1	TRUE	-2.09287	0.08128	14839.6	52695	14282.7	62851	15411.8	32728.4	-37855.4	0.281614	-0.550346	3.55096	1.82821
712	563	tr|L7LXH5|L7LXH5_9ACAR	N/A	N/A	Putative emp24/gp25l/p24 family of membrane trafficking OS=Rhipicephalus pulchellus PE=2 SV=1	TRUE	2.08951	0.08165	109629	86382.3	113656	85201.9	21518.6	5662.2	23246.9	1.26912	0.103502	0.78795	-0.343825
713	678	tr|A0A1E1X3J5|A0A1E1X3J5_9ACAR	N/A	N/A	Putative cystein protease calpain-b (Fragment) OS=Amblyomma aureolatum PE=2 SV=1	TRUE	2.06853	0.08406	28629.6	23000.3	28103.3	23947	3502.28	4166.22	5629.24	1.24475	0.0950807	0.803377	-0.315851
714	227	tr|L7M4Z0|L7M4Z0_9ACAR	N/A	N/A	Putative phosphoenolpyruvate carboxykinase OS=Rhipicephalus pulchellus PE=2 SV=1	TRUE	2.04776	0.08651	175435	109150	192132	108024	64642	3539.11	66284.9	1.60728	0.206092	0.622168	-0.684624
715	409	tr|A0A131XDJ4|A0A131XDJ4_9ACAR	N/A	N/A	Putative prohibitins and stomatins of the pid superfamily protein OS=Hyalomma excavatum PE=2 SV=1	TRUE	-2.03182	0.08844	32859.2	43531.4	31485.2	45833.4	4491.2	9496.58	-10672.2	0.75484	-0.122145	1.32478	0.405757
716	277	tr|A0A131YMQ4|A0A131YMQ4_RHIAP	N/A	N/A	T-complex protein 1 subunit zeta OS=Rhipicephalus appendiculatus PE=3 SV=1	TRUE	1.99743	0.09276	77832.1	70915.2	79131.2	70957.7	5971.39	3508.42	6916.88	1.09754	0.0404193	0.911131	-0.13427
717	429	tr|Q6B8B6|Q6B8B6_9ACAR	N/A	N/A	Ribosomal protein S15 OS=Ixodes pacificus PE=2 SV=1	TRUE	-1.99315	0.09331	15958.6	21819.2	17134.3	21280.3	5632.29	1691.31	-5860.61	0.731401	-0.135844	1.36724	0.451266
718	208	tr|L7M8R4|L7M8R4_9ACAR	N/A	N/A	Putative 26s protease regulatory subunit 7 OS=Rhipicephalus pulchellus PE=2 SV=1	TRUE	-1.99202	0.09345	213998	257710	226736	262824	41972.1	12822.9	-43712.1	0.830382	-0.0807218	1.20426	0.268152
719	796	tr|L7M1I4|L7M1I4_9ACAR	N/A	N/A	Putative karyopherin importin beta 1 OS=Rhipicephalus pulchellus PE=2 SV=1	TRUE	-1.96364	0.0972	2476.55	4318.99	2479.18	3998.79	265.769	1857.64	-1842.44	0.57341	-0.241534	1.74395	0.80236
720	541	tr|L7LYW8|L7LYW8_9ACAR	N/A	N/A	Serine/threonine-protein phosphatase OS=Rhipicephalus pulchellus PE=2 SV=1	TRUE	1.96227	0.09739	57549.4	51545	56588.3	52074.7	3964.9	4661.76	6004.39	1.11649	0.0478542	0.895666	-0.158968
721	860	tr|L7M3A1|L7M3A1_9ACAR	N/A	N/A	Putative d-3-phosphoglycerate dehydrogen OS=Rhipicephalus pulchellus PE=2 SV=1	TRUE	-1.94318	0.1	390.022	761.381	285.474	795.929	297.627	239.809	-371.359	0.512256	-0.290513	1.95215	0.965062
722	290	tr|L7M7M2|L7M7M2_9ACAR	N/A	N/A	Uncharacterized protein OS=Rhipicephalus pulchellus PE=2 SV=1	TRUE	1.94089	0.10032	28727.1	23615.5	29901.1	24212.9	3965.77	3466.65	5111.69	1.21646	0.0850961	0.822061	-0.282683
723	821	tr|A0A131XPX1|A0A131XPX1_9ACAR	N/A	N/A	Putative ubiquinone oxidoreductase ndufa2/b8 subunit (Fragment) OS=Hyalomma excavatum PE=2 SV=1	TRUE	1.93961	0.1005	20140.3	13547	20383.3	16261.4	2876.32	6160.25	6593.38	1.48671	0.172225	0.672628	-0.572118
724	404	tr|A0A131XIK8|A0A131XIK8_9ACAR	N/A	N/A	Putative glycyl-trna synthetase-like protein OS=Hyalomma excavatum PE=2 SV=1	TRUE	1.93428	0.10124	143826	132494	145284	133244	5917.57	10113.9	11332.8	1.08553	0.0356437	0.921205	-0.118406
725	774	tr|B7QIS3|B7QIS3_IXOSC	N/A	N/A	3-hydroxyacyl-CoA dehydrogenase, putative OS=Ixodes scapularis GN=8041861 PE=4 SV=1	TRUE	-1.92958	0.1019	21216.6	32582.1	24429.5	32877	11537.1	2381.13	-11365.5	0.651173	-0.186304	1.53569	0.618888
726	598	tr|A0A1E1X4T0|A0A1E1X4T0_9ACAR	N/A	N/A	Putative ribose-phosphate pyrophosphokinase (Fragment) OS=Amblyomma aureolatum PE=2 SV=1	TRUE	-1.92621	0.10238	45378.7	51491.9	45677.4	51869.7	1523.45	6161.77	-6113.11	0.88128	-0.0548861	1.13471	0.182328
727	896	tr|Q86G70|Q86G70_DERVA	N/A	N/A	Putative HMG-like protein OS=Dermacentor variabilis PE=2 SV=1	TRUE	-1.92256	0.1029	55680.9	62905.4	55490.1	64214.1	1866.21	7280.08	-7224.46	0.885154	-0.0529814	1.12975	0.176
728	222	tr|G3MMG2|G3MMG2_9ACAR	N/A	N/A	40S ribosomal protein S4 OS=Amblyomma maculatum PE=2 SV=1	TRUE	1.91204	0.10441	178967	130054	191757	131972	29558.8	41759.8	48912.5	1.37609	0.138648	0.726695	-0.460578
729	842	tr|G3ML11|G3ML11_9ACAR	N/A	N/A	Uncharacterized protein OS=Amblyomma maculatum PE=2 SV=1	TRUE	1.90425	0.10555	3335.86	1953.72	3411.64	1746.8	228.735	1433.51	1382.15	1.70745	0.232347	0.58567	-0.771839
730	207	tr|A0A131Z2D8|A0A131Z2D8_RHIAP	N/A	N/A	T-complex protein 1 subunit beta OS=Rhipicephalus appendiculatus PE=3 SV=1	TRUE	1.8907	0.10755	93638.8	89215.3	93069.5	90171.1	3382.25	3233.46	4423.49	1.04958	0.0210164	0.95276	-0.0698151
731	614	tr|A0A131YLL6|A0A131YLL6_RHIAP	N/A	N/A	Toll-like receptor 5 OS=Rhipicephalus appendiculatus PE=4 SV=1	TRUE	1.88242	0.10879	23857.9	12576.8	23590	11073	11352.7	3843.83	11281.1	1.89698	0.278063	0.527154	-0.923704
732	164	tr|A0A131XL81|A0A131XL81_9ACAR	N/A	N/A	Putative medium chain acyl-coa dehydrogenase OS=Hyalomma excavatum PE=2 SV=1	TRUE	-1.87219	0.11034	131828	151124	134430	143705	8158.36	18929.6	-19295.5	0.87232	-0.0593242	1.14637	0.197071
733	131	tr|A0A224YQ23|A0A224YQ23_9ACAR	N/A	N/A	26S protease regulatory subunit 6A-B OS=Rhipicephalus zambeziensis PE=3 SV=1	TRUE	1.85004	0.11378	247853	226265	252957	225344	21485.9	9111.34	21588	1.09541	0.0395769	0.9129	-0.131472
734	388	tr|V5HR13|V5HR13_IXORI	N/A	N/A	Putative sarcomere (Fragment) OS=Ixodes ricinus PE=2 SV=1	TRUE	1.84205	0.11505	229701	215062	229703	215520	6520.86	14494.3	14638.4	1.06807	0.0285981	0.936272	-0.0950008
735	711	tr|L7M6U3|L7M6U3_9ACAR	N/A	N/A	Uncharacterized protein OS=Rhipicephalus pulchellus PE=2 SV=1	TRUE	1.83484	0.11621	36901.6	23711.3	36647.6	27844.9	559.149	14366.7	13190.3	1.55628	0.192089	0.642556	-0.638106
736	109	tr|A0A131YNN3|A0A131YNN3_RHIAP	N/A	N/A	15-hydroxyprostaglandin dehydrogenase (NAD) OS=Rhipicephalus appendiculatus PE=3 SV=1	TRUE	-1.82809	0.1173	1.50929e+06	1.76264e+06	1.49075e+06	1.7514e+06	271641	55103.1	-253349	0.856267	-0.0673906	1.16786	0.223867
737	309	tr|A0A224Z6W7|A0A224Z6W7_9ACAR	N/A	N/A	Ribosomal protein s17 OS=Rhipicephalus zambeziensis PE=3 SV=1	TRUE	1.79743	0.12239	180223	166757	178613	169046	5738.86	13840.4	13465.5	1.08075	0.0337249	0.925284	-0.112032
738	899	tr|L7M921|L7M921_9ACAR	N/A	N/A	Putative lysosomal & prostatic acid phosphatase OS=Rhipicephalus pulchellus PE=2 SV=1	TRUE	1.79054	0.12356	42167.5	30536	42614	35124.6	8352.33	9951.68	11631.5	1.38091	0.140166	0.72416	-0.46562
739	42	tr|A0A131XQM1|A0A131XQM1_9ACAR	N/A	N/A	Putative myosin alkali light chain protein OS=Hyalomma excavatum PE=2 SV=1	TRUE	1.78512	0.12449	95292.5	3577.04	95354.8	3483.16	102753	808.001	91715.5	26.6401	1.42554	0.0375374	-4.73553
740	508	tr|L7LUL6|L7LUL6_9ACAR	N/A	N/A	Putative mitochondrial/plastidial beta-ketoacyl-acp reductase OS=Rhipicephalus pulchellus PE=2 SV=1	TRUE	1.78014	0.12535	53618.4	46929.8	52357.3	46621.9	5558.42	5057.05	6688.57	1.14252	0.0578649	0.875256	-0.192223
741	31	tr|A0A224YVU2|A0A224YVU2_9ACAR	N/A	N/A	Elongation factor 2-like OS=Rhipicephalus zambeziensis PE=4 SV=1	TRUE	1.77917	0.12552	156617	85039.4	150128	92226.6	77749.6	20713.7	71577.3	1.8417	0.265218	0.542978	-0.881035
742	612	tr|B7PVG5|B7PVG5_IXOSC	N/A	N/A	Obg-like ATPase 1 OS=Ixodes scapularis GN=8031955 PE=3 SV=1	TRUE	1.76079	0.12876	66046.2	34832.8	81225.6	35535.7	35273.6	3571.55	31213.4	1.89609	0.277859	0.5274	-0.923029
743	569	tr|A0A0A7MGQ1|A0A0A7MGQ1_9ACAR	N/A	N/A	Cystatin OS=Rhipicephalus haemaphysaloides PE=2 SV=1	TRUE	1.74378	0.13182	1444.33	878.137	1372.4	877.046	555.222	336.788	566.191	1.64476	0.216103	0.60799	-0.71788
744	30	tr|L7M741|L7M741_9ACAR	N/A	N/A	Putative hydroxyacyl-coenzyme a dehydrogenase/3-ketoacyl-coenzyme a thiolase/enoyl-coenzyme a hydrat OS=Rhipicephalus pulchellus PE=2 SV=1	TRUE	1.73312	0.13378	394661	364131	396118	372306	4521.87	34939.8	30530	1.08384	0.0349665	0.922643	-0.116156
745	348	tr|A0A131YH49|A0A131YH49_RHIAP	N/A	N/A	Myosin light chain 6 OS=Rhipicephalus appendiculatus PE=4 SV=1	TRUE	1.71138	0.13786	424446	375322	425053	392285	13363.1	55830.7	49123.2	1.13088	0.0534176	0.884265	-0.177449
746	444	tr|V5I1L1|V5I1L1_IXORI	N/A	N/A	Putative ribosomal protein l30 (Fragment) OS=Ixodes ricinus PE=2 SV=1	TRUE	1.70404	0.13926	56815.8	28182.7	64750.2	29820.2	26313.7	20903.6	28633.1	2.01598	0.304487	0.496036	-1.01148
747	625	tr|A0A224Z0D2|A0A224Z0D2_9ACAR	N/A	N/A	Histidine ammonia-lyase OS=Rhipicephalus zambeziensis PE=3 SV=1	TRUE	1.70378	0.13931	3158.01	2018.49	3337.43	1794.08	1137.94	703.1	1139.52	1.56454	0.194387	0.639165	-0.645739
748	858	tr|Q4PMC2|Q4PMC2_IXOSC	N/A	N/A	Ribosomal protein S20 OS=Ixodes scapularis GN=8037486 PE=2 SV=1	TRUE	1.67828	0.1443	146455	138311	149654	137440	8126.66	5306.09	8144.29	1.05888	0.0248484	0.944391	-0.0825445
749	640	tr|A0A224YSA5|A0A224YSA5_9ACAR	N/A	N/A	Large subunit ribosomal protein L14e OS=Rhipicephalus zambeziensis PE=4 SV=1	TRUE	-1.67005	0.14595	74465.8	83035.6	74165.5	82767	2462.05	9963.23	-8569.8	0.896794	-0.0473075	1.11508	0.157152
750	216	tr|L7M579|L7M579_9ACAR	N/A	N/A	Dolichyl-diphosphooligosaccharide--protein glycosyltransferase 48 kDa subunit OS=Rhipicephalus pulchellus PE=2 SV=1	TRUE	-1.66499	0.14697	325035	355549	324758	352953	3875.71	36448.5	-30514.2	0.914177	-0.0389696	1.09388	0.129454
751	852	tr|G3MT47|G3MT47_9ACAR	N/A	N/A	Uncharacterized protein OS=Amblyomma maculatum PE=2 SV=1	TRUE	1.64053	0.152	18483	10807.8	20759	11032.9	5518.33	7556.55	7675.24	1.71016	0.233036	0.584742	-0.774129
752	786	tr|V5IFJ9|V5IFJ9_IXORI	N/A	N/A	Putative cut up OS=Ixodes ricinus PE=2 SV=1	TRUE	1.63291	0.15361	165011	97857.2	162826	88955.8	78395.3	24886.4	67153.8	1.68624	0.22692	0.593034	-0.753813
753	902	tr|A0A131YHI8|A0A131YHI8_RHIAP	N/A	N/A	Dihydrodiol dehydrogenase / D-xylose 1-dehydrogenase (NADP) OS=Rhipicephalus appendiculatus PE=4 SV=1	TRUE	1.63247	0.1537	12817.8	10851.4	12559.8	11136.6	1372.67	1979.81	1966.41	1.18121	0.0723279	0.846588	-0.240268
754	868	tr|A0A131YVZ3|A0A131YVZ3_RHIAP	N/A	N/A	FUN14 domain-containing protein 1 OS=Rhipicephalus appendiculatus PE=4 SV=1	TRUE	-1.61715	0.15697	21252.5	28262	24631.5	28914.6	7976.38	3395.5	-7009.57	0.751979	-0.123794	1.32982	0.411235
755	88	tr|L7M880|L7M880_9ACAR	N/A	N/A	Rab GDP dissociation inhibitor OS=Rhipicephalus pulchellus PE=2 SV=1	TRUE	1.58735	0.16353	38748.5	29250.1	38554.9	29864.6	3783.27	11353.9	9498.4	1.32473	0.122128	0.75487	-0.405699
756	93	tr|L7M4A5|L7M4A5_9ACAR	N/A	N/A	Peptidyl-prolyl cis-trans isomerase OS=Rhipicephalus pulchellus PE=2 SV=1	TRUE	-1.58549	0.16395	1.49697e+06	1.62409e+06	1.5614e+06	1.61682e+06	141489	75461	-127120	0.921729	-0.0353969	1.08492	0.117586
757	168	tr|A0A224Z2G3|A0A224Z2G3_9ACAR	N/A	N/A	Troponin T fast skeletal muscle OS=Rhipicephalus zambeziensis PE=4 SV=1	TRUE	1.57125	0.16718	832352	657845	844104	588262	155240	158873	174507	1.26527	0.102184	0.790345	-0.339446
758	321	tr|B7PLC7|B7PLC7_IXOSC	N/A	N/A	Cuticular protein, putative OS=Ixodes scapularis GN=8051792 PE=4 SV=1	TRUE	-1.53599	0.17545	257821	268993	259343	265789	7342.27	12557.8	-11171.8	0.958468	-0.0184224	1.04333	0.0611978
759	890	tr|A0A224YDI7|A0A224YDI7_9ACAR	N/A	N/A	Chitin-binding protein OS=Rhipicephalus zambeziensis PE=4 SV=1	TRUE	-1.5095	0.18191	7156.66	13169.3	8530.86	15738.2	3850.01	6974.26	-6012.61	0.543437	-0.264851	1.84014	0.879816
760	837	tr|L7M423|L7M423_9ACAR	N/A	N/A	Putative ribosomal protein OS=Rhipicephalus pulchellus PE=2 SV=1	TRUE	1.49463	0.18563	43257	30368.6	42969	36629.1	1463.26	17184.1	12888.4	1.4244	0.153631	0.702051	-0.510352
761	907	tr|V5HPV8|V5HPV8_IXORI	N/A	N/A	Putative ataxin-2 binding protein 1 (Fragment) OS=Ixodes ricinus PE=2 SV=1	TRUE	1.46796	0.19249	25676.5	20746.4	24989.4	22264.3	3498.24	5734.04	4930.08	1.23764	0.0925926	0.807993	-0.307586
762	317	tr|L7MAA3|L7MAA3_9ACAR	N/A	N/A	Putative chaperonin chaperonin OS=Rhipicephalus pulchellus PE=2 SV=1	TRUE	1.46708	0.19272	92226.6	83980.5	92907.4	84103.4	4811.08	10160	8246.12	1.09819	0.0406778	0.910589	-0.135129
763	446	tr|L7MFP6|L7MFP6_9ACAR	N/A	N/A	Uncharacterized protein (Fragment) OS=Rhipicephalus pulchellus PE=2 SV=1	TRUE	1.46159	0.19416	75236	69889.8	74886.8	72099	1903.98	7063.44	5346.18	1.07649	0.0320118	0.928941	-0.106341
764	897	tr|L7M660|L7M660_9ACAR	N/A	N/A	Uncharacterized protein OS=Rhipicephalus pulchellus PE=2 SV=1	TRUE	1.45761	0.19522	7886.04	5670.03	8805.07	6228.72	2277.9	2014.07	2216.01	1.39083	0.143274	0.718996	-0.475945
765	244	tr|L7MDG1|L7MDG1_9ACAR	N/A	N/A	Putative kh-type splicing regulatory protein (Fragment) OS=Rhipicephalus pulchellus PE=2 SV=1	TRUE	1.45244	0.19659	90327.4	77898.8	94555.5	82390	13324.3	10740.3	12428.5	1.15955	0.0642885	0.862406	-0.213562
766	488	tr|L7M2B2|L7M2B2_9ACAR	N/A	N/A	Translocon-associated protein subunit beta OS=Rhipicephalus pulchellus PE=2 SV=1	TRUE	-1.4445	0.19872	63304.9	66859.1	62697.7	65718.6	1366.2	4727.49	-3554.14	0.946841	-0.0237228	1.05614	0.0788055
767	592	tr|A0A1E1XNI8|A0A1E1XNI8_9ACAR	N/A	N/A	Putative ras-related small gtpase rho type (Fragment) OS=Amblyomma sculptum PE=2 SV=1	TRUE	-1.44038	0.19983	13542.2	16446.4	13591.3	17124.3	1142.57	3867.26	-2904.18	0.823415	-0.0843811	1.21445	0.280308
768	539	tr|L7M2A3|L7M2A3_9ACAR	N/A	N/A	40S ribosomal protein S27 OS=Rhipicephalus pulchellus PE=2 SV=1	TRUE	-1.43592	0.20104	175298	271240	131583	265216	88349.9	100259	-95942.2	0.646283	-0.189577	1.54731	0.629763
769	406	tr|A0A224YGA0|A0A224YGA0_9ACAR	N/A	N/A	3-hydroxyacyl-CoA dehydrogenase OS=Rhipicephalus zambeziensis PE=4 SV=1	TRUE	1.42415	0.20427	182903	175019	182284	172279	6009.81	9298.32	7883.72	1.04504	0.019135	0.956897	-0.063565
770	469	tr|A0A224Z666|A0A224Z666_9ACAR	N/A	N/A	Phosphoserine aminotransferase OS=Rhipicephalus zambeziensis PE=3 SV=1	TRUE	1.42314	0.20455	28659.2	18656.7	28486.1	19245.1	8577.27	11136.7	10002.5	1.53613	0.186429	0.650985	-0.619304
771	893	tr|A0A131XLZ2|A0A131XLZ2_9ACAR	N/A	N/A	Putative phosphoglucomutase (Fragment) OS=Hyalomma excavatum PE=2 SV=1	TRUE	1.41228	0.20757	53996.3	33013.7	54019.7	28321.7	747.64	29705.1	20982.7	1.63558	0.213671	0.611406	-0.709798
772	642	tr|F0J941|F0J941_AMBVA	N/A	N/A	Glycoprotein gC1qBP (Fragment) OS=Amblyomma variegatum PE=2 SV=1	TRUE	-1.40992	0.20824	34718	41948.6	33997.5	41362.3	9801.74	3021.15	-7230.61	0.827632	-0.0821628	1.20827	0.272939
773	812	tr|A0A224Z1J7|A0A224Z1J7_9ACAR	N/A	N/A	Uncharacterized protein OS=Rhipicephalus zambeziensis PE=4 SV=1	TRUE	1.40909	0.20847	8764.14	7095.9	9027.83	7000.72	573.371	2297.36	1668.24	1.2351	0.091702	0.809651	-0.304627
774	108	tr|G3MRE3|G3MRE3_9ACAR	N/A	N/A	NADH dehydrogenase [ubiquinone] flavoprotein 1, mitochondrial OS=Amblyomma maculatum PE=2 SV=1	TRUE	-1.40362	0.21001	15329.9	22838.2	18975.9	21111.1	9954.54	3919.91	-7508.31	0.671239	-0.173123	1.48978	0.575102
775	588	tr|A0A224YXN9|A0A224YXN9_9ACAR	N/A	N/A	Elongation factor Ts, mitochondrial OS=Rhipicephalus zambeziensis PE=3 SV=1	TRUE	1.39542	0.21235	31566.5	22251.5	30003.4	26805.3	8394.15	10381.9	9315.02	1.41862	0.151867	0.704909	-0.504492
776	77	tr|A0A224YPB3|A0A224YPB3_9ACAR	N/A	N/A	Heat shock protein OS=Rhipicephalus zambeziensis PE=3 SV=1	TRUE	1.39535	0.21237	610250	577935	600175	562338	29912.4	35364	32315.1	1.05591	0.0236289	0.947046	-0.0784933
777	836	tr|A0A224Z2U9|A0A224Z2U9_9ACAR	N/A	N/A	Threonyl trna synthetase OS=Rhipicephalus zambeziensis PE=3 SV=1	TRUE	1.39438	0.21265	47961.2	41890.1	49195.6	40686.9	4892.41	7203.56	6071.04	1.14493	0.0587781	0.873417	-0.195257
778	885	tr|L7M2J2|L7M2J2_9ACAR	N/A	N/A	Putative methylcrotonoyl-coenzyme a carboxylase 1 alpha OS=Rhipicephalus pulchellus PE=2 SV=1	TRUE	-1.38607	0.21504	8238.4	24307.9	8528.05	21534.3	1099.8	23161	-16069.5	0.338919	-0.469905	2.95056	1.56099
779	826	tr|L7M5S1|L7M5S1_9ACAR	N/A	N/A	Putative phosphatidylinositol transfer protein OS=Rhipicephalus pulchellus PE=2 SV=1	TRUE	-1.37309	0.21883	14318	25410.4	14059.3	18965.1	1317.62	16103.1	-11092.4	0.563469	-0.24913	1.77472	0.827592
780	604	tr|A0A224YWG1|A0A224YWG1_9ACAR	N/A	N/A	NADH dehydrogenase (Ubiquinone) Fe-S protein 8 OS=Rhipicephalus zambeziensis PE=3 SV=1	TRUE	-1.3698	0.2198	154813	169207	156380	176877	3948.89	20642.6	-14394.5	0.91493	-0.0386122	1.09298	0.128267
781	589	tr|A0A224Z3D1|A0A224Z3D1_9ACAR	N/A	N/A	Large subunit ribosomal protein L27e OS=Rhipicephalus zambeziensis PE=4 SV=1	TRUE	-1.36392	0.22154	378363	389242	378278	388362	14915.5	5655.55	-10878.5	0.972052	-0.0123105	1.02875	0.0408945
782	633	tr|L7MDE2|L7MDE2_9ACAR	N/A	N/A	Uncharacterized protein (Fragment) OS=Rhipicephalus pulchellus PE=2 SV=1	TRUE	1.35999	0.22271	27452	21027.2	27725.7	24604.5	1188.09	9373.33	6424.81	1.30555	0.115793	0.765962	-0.384655
783	866	tr|A0A131Z6C6|A0A131Z6C6_RHIAP	N/A	N/A	Cystatin-A/B OS=Rhipicephalus appendiculatus PE=4 SV=1	TRUE	-1.35912	0.22297	10995.6	16847.8	9735.72	16648.1	8233.92	2522.63	-5852.16	0.652645	-0.185323	1.53223	0.615629
784	175	tr|L7M840|L7M840_9ACAR	N/A	N/A	Putative multifunctional chaperone 14-3-3 family OS=Rhipicephalus pulchellus PE=2 SV=1	TRUE	1.35744	0.22348	224064	210044	224041	219744	3964.26	20272.1	14019.7	1.06675	0.0280612	0.93743	-0.0932172
785	505	tr|L7M456|L7M456_9ACAR	N/A	N/A	Transcription factor BTF3 OS=Rhipicephalus pulchellus PE=2 SV=1	TRUE	1.35522	0.22414	26472.6	24542.8	27147.6	24516.1	2845.43	118.288	1929.76	1.07863	0.0328718	0.927104	-0.109198
786	577	tr|A0A224YDD6|A0A224YDD6_9ACAR	N/A	N/A	Peptidyl-prolyl cis-trans isomerase OS=Rhipicephalus zambeziensis PE=3 SV=1	TRUE	1.31898	0.23528	27601.3	24318.7	28910.7	23597.4	3778.65	3240	3282.63	1.13498	0.0549898	0.88107	-0.182672
787	475	tr|A0A1E1X5Y9|A0A1E1X5Y9_9ACAR	N/A	N/A	Sorting nexin OS=Amblyomma aureolatum PE=2 SV=1	TRUE	-1.28825	0.24511	7840.28	11440.7	8720.62	10369.4	1967.7	5231.9	-3600.46	0.685295	-0.164122	1.45923	0.545203
788	572	tr|A0A131XCP0|A0A131XCP0_9ACAR	N/A	N/A	Putative ornithine aminotransferase OS=Hyalomma excavatum PE=2 SV=1	TRUE	-1.25976	0.25454	32880.8	38280.7	33310.2	36736.1	4391.46	7362.76	-5399.93	0.858939	-0.0660379	1.16423	0.219373
789	832	tr|A0A131YP17|A0A131YP17_RHIAP	N/A	N/A	Reductase OS=Rhipicephalus appendiculatus PE=4 SV=1	TRUE	1.24445	0.25974	36269.1	33801.6	37107.1	34061.4	1942.4	3457.32	2467.5	1.073	0.0305995	0.931967	-0.101649
790	297	tr|L7MGY9|L7MGY9_9ACAR	N/A	N/A	Putative heteroproteinous nuclear ribonucleoprotein l (Fragment) OS=Rhipicephalus pulchellus PE=2 SV=1	TRUE	1.23251	0.26386	40901.9	30839.1	41921.7	36590.4	3059.16	16039.8	10062.8	1.3263	0.122641	0.753978	-0.407405
791	908	tr|A0A131XD15|A0A131XD15_9ACAR	N/A	N/A	Putative head-elevated expression protein (Fragment) OS=Hyalomma excavatum PE=2 SV=1	TRUE	-1.1974	0.27631	24923.6	32539.6	29819	32968	12520.5	2249.06	-7615.99	0.765947	-0.115801	1.30557	0.384684
792	740	tr|A0A131XKI4|A0A131XKI4_9ACAR	N/A	N/A	Putative eukaryotic translation initiation factor 4h OS=Hyalomma excavatum PE=2 SV=1	TRUE	1.1898	0.27907	8087.11	5901.64	7582.7	6073.73	1581.25	3315.97	2185.47	1.37032	0.136821	0.729759	-0.454508
793	311	tr|A0A131XEY6|A0A131XEY6_9ACAR	N/A	N/A	Uncharacterized protein OS=Hyalomma excavatum PE=2 SV=1	TRUE	1.18779	0.2798	121599	78318.4	124554	79703.8	72651.1	5717.81	43280.5	1.55262	0.191066	0.644072	-0.634707
794	521	tr|A0A224YVE7|A0A224YVE7_9ACAR	N/A	N/A	Protein containing I-set domain OS=Rhipicephalus zambeziensis PE=4 SV=1	TRUE	-1.17579	0.28422	28855.3	31435.7	28367.7	30600	3331.85	2857.38	-2580.43	0.917914	-0.037198	1.08943	0.123569
795	742	tr|A0A131XMH8|A0A131XMH8_9ACAR	N/A	N/A	ATP synthase subunit alpha (Fragment) OS=Hyalomma excavatum PE=2 SV=1	TRUE	-1.16563	0.288	494945	502707	492466	503979	7237.39	11179.8	-7761.86	0.98456	-0.00675787	1.01568	0.0224492
796	659	tr|A0A224YIB0|A0A224YIB0_9ACAR	N/A	N/A	Uncharacterized protein OS=Rhipicephalus zambeziensis PE=4 SV=1	TRUE	1.16412	0.28857	168904	73296.6	170188	8702.2	100410	129994	95607.7	2.30439	0.362557	0.433954	-1.20439
797	462	tr|L7M5K3|L7M5K3_9ACAR	N/A	N/A	Succinate--CoA ligase [ADP/GDP-forming] subunit alpha, mitochondrial OS=Rhipicephalus pulchellus PE=2 SV=1	TRUE	1.15587	0.29168	67747.5	42061	86191.7	49932.2	38027.3	23006.9	25686.5	1.6107	0.207014	0.62085	-0.687684
798	546	tr|C9W1P0|C9W1P0_RHISA	N/A	N/A	Ribosomal protein L21 OS=Rhipicephalus sanguineus PE=2 SV=1	TRUE	-1.09066	0.31727	74893.8	84057.9	74416.2	86955	4148.7	16284.5	-9164.08	0.890979	-0.0501326	1.12236	0.166537
799	401	tr|A0A224Z9F0|A0A224Z9F0_9ACAR	N/A	N/A	Superoxide dismutase [Cu-Zn] OS=Rhipicephalus zambeziensis PE=3 SV=1	TRUE	1.08476	0.31968	151224	119480	127016	121500	58163.4	6520.3	31744.2	1.26569	0.102326	0.790085	-0.33992
800	526	tr|L7M6S0|L7M6S0_9ACAR	N/A	N/A	Putative vesicle coat complex copii subunit sec13 OS=Rhipicephalus pulchellus PE=2 SV=1	TRUE	-1.07502	0.32368	39512.4	42986.8	41760	43044.1	6218.44	1764.34	-3474.41	0.919175	-0.0366018	1.08793	0.121588
801	67	tr|L7M8Y4|L7M8Y4_9ACAR	N/A	N/A	Malate dehydrogenase OS=Rhipicephalus pulchellus PE=2 SV=1	TRUE	1.07077	0.32544	144558	126508	142704	124690	29669.8	16011.9	18050.4	1.14268	0.0579252	0.875134	-0.192423
802	900	tr|A0A224Z5I7|A0A224Z5I7_9ACAR	N/A	N/A	Peptidyl-prolyl cis-trans isomerase OS=Rhipicephalus zambeziensis PE=4 SV=1	TRUE	1.05344	0.3327	13121.6	10006.7	12600.7	9541.53	5762.34	1329.65	3114.9	1.31128	0.117696	0.762613	-0.390977
803	624	tr|C9W1E1|C9W1E1_RHISA	N/A	N/A	ATP synthase E chain OS=Rhipicephalus sanguineus PE=2 SV=1	TRUE	1.0373	0.33958	308369	287968	310604	286378	19750.8	34018.7	20401.8	1.07085	0.0297277	0.93384	-0.0987532
804	457	tr|A0A224YS77|A0A224YS77_9ACAR	N/A	N/A	26S proteasome regulatory subunit N5 (Fragment) OS=Rhipicephalus zambeziensis PE=4 SV=1	TRUE	1.03586	0.3402	64179.4	62103.6	63863.1	61349.4	3447.47	2043.94	2075.77	1.03342	0.0142787	0.967657	-0.0474328
805	349	tr|A0A224YEU2|A0A224YEU2_9ACAR	N/A	N/A	Serine protease inhibitor OS=Rhipicephalus zambeziensis PE=3 SV=1	TRUE	-1.02584	0.34454	61882.9	87603.9	60186.8	88070.6	9068.95	49319.7	-25721.1	0.706394	-0.150953	1.41564	0.501456
806	438	tr|A0A224YIW4|A0A224YIW4_9ACAR	N/A	N/A	NIPSNAP1 protein OS=Rhipicephalus zambeziensis PE=4 SV=1	TRUE	-1.01211	0.35055	54286.9	56222.9	53522.5	55884.3	2719.22	2690.96	-1935.98	0.965566	-0.015218	1.03566	0.0505531
807	618	tr|A0A224Z5D4|A0A224Z5D4_9ACAR	N/A	N/A	Very long chain acyl-CoA dehydrogenase OS=Rhipicephalus zambeziensis PE=3 SV=1	TRUE	1.0086	0.3521	9233.7	6633.66	10013.1	7831.84	3958.36	3303.48	2600.04	1.39195	0.143623	0.718418	-0.477104
808	615	tr|L7M9E3|L7M9E3_9ACAR	N/A	N/A	AP complex subunit beta OS=Rhipicephalus pulchellus PE=2 SV=1	TRUE	1.00394	0.35416	41378	39457.9	41486.2	39791.4	3313.04	1911.93	1920.1	1.04866	0.0206355	0.953596	-0.0685498
809	185	tr|A0A131XG35|A0A131XG35_9ACAR	N/A	N/A	Uncharacterized protein OS=Hyalomma excavatum PE=2 SV=1	TRUE	0.999926	0.35595	130929	125898	134018	125258	8166.22	5881.16	5031.4	1.03996	0.0170184	0.961571	-0.056534
810	210	tr|A0A131XK26|A0A131XK26_9ACAR	N/A	N/A	Putative acetyl-coa carboxylase (Fragment) OS=Hyalomma excavatum PE=2 SV=1	TRUE	0.995125	0.3581	120866	109928	117518	113570	7347.76	20718.1	10937.7	1.0995	0.0411946	0.909506	-0.136845
811	370	tr|L7M3F2|L7M3F2_9ACAR	N/A	N/A	Putative ribosomal protein l18 OS=Rhipicephalus pulchellus PE=2 SV=1	TRUE	-0.991345	0.3598	213887	258685	215455	301346	5139.4	90232.6	-44798.3	0.826823	-0.0825875	1.20945	0.27435
812	533	tr|A0A131Z1Z4|A0A131Z1Z4_RHIAP	N/A	N/A	Uncharacterized protein OS=Rhipicephalus appendiculatus PE=4 SV=1	TRUE	-0.983239	0.36346	142749	153020	140067	158057	9962.51	18365.4	-10271.7	0.932874	-0.030177	1.07196	0.100246
813	738	tr|A0A224YYJ8|A0A224YYJ8_9ACAR	N/A	N/A	Membrane protein OS=Rhipicephalus zambeziensis PE=4 SV=1	TRUE	0.981169	0.3644	6341.65	4427.24	7135.78	4980.49	2887.82	2624.58	1914.41	1.43242	0.156069	0.698121	-0.518451
814	345	tr|F1PCE5|F1PCE5_CANLF	N/A	N/A	Serpin family A member 1 OS=Canis lupus familiaris GN=SERPINA1 PE=3 SV=2	TRUE	0.963251	0.37262	389464	365348	385401	370375	46135	19463.3	24116.2	1.06601	0.0277608	0.938078	-0.0922195
815	361	tr|A0A224YG33|A0A224YG33_9ACAR	N/A	N/A	Proteasome subunit beta type OS=Rhipicephalus zambeziensis PE=3 SV=1	TRUE	-0.955065	0.37642	105776	119214	109629	118246	18736.1	20995.7	-13437.8	0.88728	-0.0519391	1.12704	0.172538
816	443	tr|A0A224Z8X5|A0A224Z8X5_9ACAR	N/A	N/A	T-complex protein 1 subunit delta OS=Rhipicephalus zambeziensis PE=3 SV=1	TRUE	0.953569	0.37712	71013.8	55613.5	71953.1	49823.4	24014.9	21600.7	15400.3	1.27692	0.106162	0.783137	-0.352663
817	466	tr|L7LY05|L7LY05_9ACAR	N/A	N/A	Isocitrate dehydrogenase [NAD] subunit, mitochondrial OS=Rhipicephalus pulchellus PE=2 SV=1	TRUE	-0.946432	0.38047	34880.1	39748.4	37066.6	41649.7	6147.68	8248.77	-4868.29	0.877522	-0.0567418	1.13957	0.188492
818	188	tr|A0A224YLQ5|A0A224YLQ5_9ACAR	N/A	N/A	26s proteasome regulatory complex atpase rpt1 OS=Rhipicephalus zambeziensis PE=3 SV=1	TRUE	0.938687	0.38412	145253	129948	146339	132950	4388.19	32312.2	15304.7	1.11778	0.0483547	0.894634	-0.160631
819	820	tr|A0A131YH18|A0A131YH18_RHIAP	N/A	N/A	Uncharacterized protein OS=Rhipicephalus appendiculatus PE=4 SV=1	TRUE	-0.902975	0.40134	13621.9	17363.7	13527.3	20832.8	877.125	8241.15	-3741.79	0.784505	-0.105404	1.27469	0.350146
820	127	tr|L7M7D6|L7M7D6_9ACAR	N/A	N/A	Putative biosynthetic process OS=Rhipicephalus pulchellus PE=2 SV=1	TRUE	-0.900007	0.40279	245024	271524	245453	267008	46100.9	36638.5	-26499.4	0.902405	-0.0445985	1.10815	0.148153
821	654	tr|A0A131YL25|A0A131YL25_RHIAP	N/A	N/A	Methylenetetrahydrofolate dehydrogenase (NADP+) / methenyltetrahydrofolate cyclohydrolase OS=Rhipicephalus appendiculatus PE=3 SV=1	TRUE	0.899174	0.4032	5174.74	4137.92	5122.79	3966.8	630.018	2218.43	1036.82	1.25057	0.0971063	0.799639	-0.32258
822	407	tr|L7MB37|L7MB37_9ACAR	N/A	N/A	Putative actin OS=Rhipicephalus pulchellus PE=2 SV=1	TRUE	0.898292	0.40364	63758.2	60678.5	63332.4	60947.8	1343.57	6723.78	3079.66	1.05075	0.0215009	0.951698	-0.0714246
823	670	tr|L7MF21|L7MF21_9ACAR	N/A	N/A	Putative f-actin capping protein alpha subunit (Fragment) OS=Rhipicephalus pulchellus PE=2 SV=1	TRUE	-0.867926	0.41879	21136.6	22641.3	20787.1	22902.8	1360.93	3189.11	-1504.7	0.933542	-0.0298663	1.07119	0.0992139
824	637	tr|L7M7F9|L7M7F9_9ACAR	N/A	N/A	Putative integrin-linked kinase OS=Rhipicephalus pulchellus PE=2 SV=1	TRUE	-0.855314	0.42521	36923.3	47455.2	47056.2	48536.4	24355.7	3644.69	-10531.9	0.778067	-0.108983	1.28524	0.362034
825	806	tr|B7PDK2|B7PDK2_IXOSC	N/A	N/A	Cuticular protein, putative OS=Ixodes scapularis GN=8028330 PE=4 SV=1	TRUE	-0.847151	0.4294	90785.3	94373.9	90616.2	94062.8	4487.48	7186.19	-3588.63	0.961974	-0.0168365	1.03953	0.0559297
826	236	tr|A0A131YL94|A0A131YL94_RHIAP	N/A	N/A	Sodium/potassium-transporting ATPase subunit alpha OS=Rhipicephalus appendiculatus PE=3 SV=1	TRUE	-0.839282	0.43347	111953	124403	111469	115843	14438.6	25916.7	-12449.6	0.899925	-0.0457935	1.1112	0.152123
827	535	tr|A0A131XMF7|A0A131XMF7_9ACAR	N/A	N/A	Alpha-1,4 glucan phosphorylase (Fragment) OS=Hyalomma excavatum PE=2 SV=1	TRUE	-0.835315	0.43553	221374	229908	222990	227414	16232.1	12408	-8533.31	0.962884	-0.0164261	1.03855	0.0545665
828	660	tr|G3MJ15|G3MJ15_9ACAR	N/A	N/A	Uncharacterized protein (Fragment) OS=Amblyomma maculatum PE=2 SV=1	TRUE	-0.798904	0.4548	5545.12	7400.95	5990.76	7499.42	2426.35	3962.03	-1855.84	0.749244	-0.125377	1.33468	0.416493
829	582	tr|A0A131XCV1|A0A131XCV1_9ACAR	N/A	N/A	Putative conserved secreted protein OS=Hyalomma excavatum PE=2 SV=1	TRUE	0.789205	0.46003	63093	36658.7	63225.4	3769.77	4941.54	66807.2	26434.3	1.72109	0.235804	0.581027	-0.783323
830	641	tr|L7M669|L7M669_9ACAR	N/A	N/A	Histone H2A OS=Rhipicephalus pulchellus PE=2 SV=1	TRUE	-0.779729	0.46519	104415	236929	91383.7	75975.4	99669.9	324956	-132514	0.4407	-0.355857	2.26912	1.18213
831	870	tr|L7LTU1|L7LTU1_9ACAR	N/A	N/A	Putative tick salivary serpin OS=Rhipicephalus pulchellus PE=2 SV=1	TRUE	-0.761232	0.47536	12396.1	19816.9	11562.8	11231.1	5515.07	18700.6	-7420.83	0.625531	-0.203751	1.59864	0.676848
832	818	tr|A0A131YXX9|A0A131YXX9_RHIAP	N/A	N/A	Ankyrin OS=Rhipicephalus appendiculatus PE=4 SV=1	TRUE	-0.757634	0.47736	14916	20035	17012.5	24137.6	4885.97	12598.8	-5118.97	0.744498	-0.128136	1.34319	0.42566
833	201	tr|L7LZL3|L7LZL3_9ACAR	N/A	N/A	Putative tho complex subunit 4 OS=Rhipicephalus pulchellus PE=2 SV=1	TRUE	-0.756916	0.47776	59228.5	67798	64382.2	65885.1	21959.3	5522.53	-8569.47	0.873603	-0.0586859	1.14468	0.19495
834	584	tr|V5HJL3|V5HJL3_IXORI	N/A	N/A	Putative vacuolar sorting protein vps1 dynamin OS=Ixodes ricinus PE=2 SV=1	TRUE	-0.756014	0.47826	33701.4	43464.9	27763.7	43193.7	13096.4	22262.6	-9763.56	0.775369	-0.110491	1.28971	0.367044
835	684	tr|L7MB29|L7MB29_9ACAR	N/A	N/A	Putative transcription factor nfat subunit nf45 OS=Rhipicephalus pulchellus PE=2 SV=1	TRUE	0.75492	0.47887	40207.2	35336.9	42384.9	32329.9	6793.1	10969.9	4870.32	1.13783	0.0560757	0.878869	-0.186279
836	762	tr|A0A023G4A7|A0A023G4A7_9ACAR	N/A	N/A	Putative cytochrome c1 OS=Amblyomma triste PE=2 SV=1	TRUE	0.734035	0.49061	92303.4	67333.9	110623	80313.2	46499.2	49662.6	24969.5	1.37083	0.136984	0.729485	-0.45505
837	272	tr|L7MIQ1|L7MIQ1_9ACAR	N/A	N/A	Putative 26s proteasome regulatory complex subunit (Fragment) OS=Rhipicephalus pulchellus PE=2 SV=1	TRUE	0.729896	0.49295	155127	146932	162420	150666	17268.3	14354.9	8195.17	1.05578	0.0235715	0.947171	-0.0783029
838	724	tr|E2QVU9|E2QVU9_CANLF	N/A	N/A	Biliverdin reductase B OS=Canis lupus familiaris GN=BLVRB PE=4 SV=1	TRUE	-0.724569	0.49599	797.086	1177.64	861.17	919.221	599.967	862.222	-380.552	0.676852	-0.169507	1.47743	0.563088
839	601	tr|L7M191|L7M191_9ACAR	N/A	N/A	Putative ubiquitin-conjugating enzyme e2 OS=Rhipicephalus pulchellus PE=2 SV=1	TRUE	0.721689	0.49763	32236.7	30877.2	31449.1	30886.6	2334.25	2957.43	1359.53	1.04403	0.0187131	0.957827	-0.0621636
840	118	tr|A0A131Z9H5|A0A131Z9H5_RHIAP	N/A	N/A	Laminin, beta 1 (Fragment) OS=Rhipicephalus appendiculatus PE=4 SV=1	TRUE	0.684417	0.51926	319971	312377	318528	307267	13323.8	17745.8	7593.92	1.02431	0.0104314	0.976267	-0.0346525
841	451	tr|B3GV23|B3GV23_RHIMP	N/A	N/A	Succinate-semialdehyde dehydrogenase OS=Rhipicephalus microplus GN=ssadh PE=2 SV=1	TRUE	0.673234	0.52587	40875.7	36065.6	40869.6	40413.3	1086.83	14248	4810.06	1.13337	0.0543716	0.882325	-0.180619
842	566	tr|A0A023FXB7|A0A023FXB7_9ACAR	N/A	N/A	Tubulin beta chain OS=Amblyomma parvum PE=2 SV=1	TRUE	0.667106	0.52951	48064.3	46798.3	48335.7	45935.2	1682.34	3402.4	1266.04	1.02705	0.0115929	0.97366	-0.0385107
843	189	tr|L7MI50|L7MI50_9ACAR	N/A	N/A	Putative glycine rich protein (Fragment) OS=Rhipicephalus pulchellus PE=2 SV=1	TRUE	-0.660639	0.53337	173884	201582	144837	194073	75769.7	35920.5	-27698.3	0.862596	-0.0641927	1.15929	0.213244
844	789	tr|L7MKU7|L7MKU7_9ACAR	N/A	N/A	Putative 3-methylcrotonyl-coa carboxylase non-biotin (Fragment) OS=Rhipicephalus pulchellus PE=2 SV=1	TRUE	0.658108	0.53489	16117.9	14903.5	16026.6	15407.1	811.883	3600.34	1214.45	1.08149	0.0340217	0.924652	-0.113018
845	689	tr|A0A1E1X5E0|A0A1E1X5E0_9ACAR	N/A	N/A	Proteasome subunit beta type OS=Amblyomma aureolatum PE=2 SV=1	TRUE	0.650403	0.53952	89644.9	85968.6	89644.7	87330.5	2559.37	11011	3676.25	1.04276	0.0181855	0.958991	-0.0604108
846	657	tr|A0A224Z4D0|A0A224Z4D0_9ACAR	N/A	N/A	Zinc finger RNA-binding protein OS=Rhipicephalus zambeziensis PE=4 SV=1	TRUE	-0.632815	0.5502	7406.02	8929.21	7199.84	10880.3	466.914	4791.31	-1523.19	0.829415	-0.0812281	1.20567	0.269834
847	679	tr|A0A034WZ74|A0A034WZ74_RHIMP	N/A	N/A	Metabotropic glutamate receptor_1 (Fragment) OS=Rhipicephalus microplus PE=4 SV=1	TRUE	0.631154	0.55121	4273.46	3324.84	5073.24	3572.76	2085.52	2164.83	948.617	1.28531	0.109009	0.778021	-0.362119
848	583	tr|A0A224YTH4|A0A224YTH4_9ACAR	N/A	N/A	Microtubule associated complex OS=Rhipicephalus zambeziensis PE=3 SV=1	TRUE	-0.630381	0.55168	57241.5	66485.2	50396.4	55109.3	16748.8	24074.5	-9243.75	0.860965	-0.0650144	1.16149	0.215973
849	658	tr|L7MAQ9|L7MAQ9_9ACAR	N/A	N/A	Eukaryotic translation initiation factor 3 subunit E OS=Rhipicephalus pulchellus PE=2 SV=1	TRUE	-0.6269	0.55381	9771.09	15065.9	9990.63	8380.49	3754.95	16469.5	-5294.84	0.648555	-0.188053	1.54189	0.624698
850	147	tr|L7MJY0|L7MJY0_9ACAR	N/A	N/A	Putative talin (Fragment) OS=Rhipicephalus pulchellus PE=2 SV=1	TRUE	-0.621513	0.55712	60274	71785.3	60138.4	85876.7	2802.62	36936.5	-11511.2	0.839643	-0.0759052	1.19098	0.252151
851	846	tr|A0A131XLP6|A0A131XLP6_9ACAR	N/A	N/A	Putative conserved secreted protein OS=Hyalomma excavatum PE=2 SV=1	TRUE	0.59804	0.57168	32732.2	28701.1	37840.6	28560.2	13378.8	1657.67	4031.11	1.14045	0.0570768	0.876846	-0.189605
852	668	tr|L7MAJ1|L7MAJ1_9ACAR	N/A	N/A	Putative fumarase OS=Rhipicephalus pulchellus PE=2 SV=1	TRUE	0.597707	0.57189	10698	7149.7	10742.2	4710.73	9971.08	6445.77	3548.32	1.49629	0.175015	0.66832	-0.581389
853	527	tr|A0A224YRH0|A0A224YRH0_9ACAR	N/A	N/A	Tumor protein d52 like 1 (Fragment) OS=Rhipicephalus zambeziensis PE=4 SV=1	TRUE	0.593103	0.57477	82093.3	76967.3	82890.4	79510.6	4252.1	16754.4	5126.07	1.0666	0.0280019	0.937558	-0.0930201
854	743	tr|J9NXT1|J9NXT1_CANLF	N/A	N/A	Tubulin alpha chain OS=Canis lupus familiaris GN=TUBA3C PE=3 SV=1	TRUE	-0.568438	0.59036	30997.4	32173.6	31966.3	33442.4	2872.77	2978.5	-1176.14	0.963444	-0.0161736	1.03794	0.0537274
855	378	tr|A0A224Z4M6|A0A224Z4M6_9ACAR	N/A	N/A	Moesin/ezrin/radixin protein 1 OS=Rhipicephalus zambeziensis PE=4 SV=1	TRUE	-0.566832	0.59139	30924.6	37199	33115.6	28973.1	11029.6	19195.2	-6274.37	0.83133	-0.0802268	1.20289	0.266508
856	513	tr|A0A131Z2N2|A0A131Z2N2_RHIAP	N/A	N/A	Protein transport protein SEC31 OS=Rhipicephalus appendiculatus PE=4 SV=1	TRUE	-0.560629	0.59535	13744.9	15045.4	14104.7	15263.5	1581.06	4361.85	-1300.54	0.913559	-0.0392633	1.09462	0.13043
857	10	tr|L7M942|L7M942_9ACAR	N/A	N/A	Putative beta-spectrin OS=Rhipicephalus pulchellus PE=2 SV=1	TRUE	0.559176	0.59628	421548	405372	424756	402189	29133.6	49984.3	16175.5	1.0399	0.0169928	0.961628	-0.0564489
858	727	tr|G3MTB1|G3MTB1_9ACAR	N/A	N/A	Uncharacterized protein OS=Amblyomma maculatum PE=2 SV=1	TRUE	-0.555932	0.59836	69218.7	70953.1	70273.7	72101.4	2827.62	5562.39	-1734.46	0.975555	-0.0107483	1.02506	0.0357052
859	833	tr|L7M7B5|L7M7B5_9ACAR	N/A	N/A	Putative glutathione s-transferase OS=Rhipicephalus pulchellus PE=2 SV=1	TRUE	0.555436	0.59868	4601.23	3786.29	5677.52	3685.33	2896.22	471.929	814.94	1.21523	0.08466	0.822887	-0.281235
860	665	tr|L7LZM1|L7LZM1_9ACAR	N/A	N/A	Putative signal peptidase subunit OS=Rhipicephalus pulchellus PE=2 SV=1	TRUE	0.553094	0.60018	42628.5	37193.6	42845.9	45404.1	2132.46	19536.8	5434.94	1.14613	0.0592322	0.872505	-0.196765
861	775	tr|A0A131YAN5|A0A131YAN5_RHIAP	N/A	N/A	Uncharacterized protein OS=Rhipicephalus appendiculatus PE=4 SV=1	TRUE	0.552992	0.60025	7000.26	5960.57	7075.62	7460.64	594.964	3712.85	1039.69	1.17443	0.0698261	0.851479	-0.231957
862	490	tr|A0A1E1X8M7|A0A1E1X8M7_9ACAR	N/A	N/A	ATP synthase subunit beta (Fragment) OS=Amblyomma aureolatum PE=2 SV=1	TRUE	-0.540972	0.60801	4760.02	7261.85	3168.22	4061.36	3500.53	8561.39	-2501.83	0.655484	-0.183438	1.52559	0.609369
863	283	tr|C9W1S8|C9W1S8_RHISA	N/A	N/A	Thioredoxin peroxidase (Fragment) OS=Rhipicephalus sanguineus PE=2 SV=1	TRUE	0.539623	0.60888	159588	155502	164367	155821	12701	8244.22	4085.51	1.02627	0.0112629	0.9744	-0.0374146
864	252	tr|L7M7J9|L7M7J9_9ACAR	N/A	N/A	Putative phosphoribosylamidoimidazole-succinocarboxamide synthase OS=Rhipicephalus pulchellus PE=2 SV=1	TRUE	-0.521614	0.62063	84172.7	98595.4	82057.2	79072.3	10845.6	54226.4	-14422.7	0.853718	-0.0686854	1.17135	0.228168
865	811	tr|A0A224Z379|A0A224Z379_9ACAR	N/A	N/A	Regulator of chromosome condensation OS=Rhipicephalus zambeziensis PE=4 SV=1	TRUE	-0.515825	0.62443	12472.4	14312.3	13119.1	16674	1511.47	6971.82	-1839.89	0.871447	-0.0597591	1.14752	0.198516
866	746	tr|A0A023FVC2|A0A023FVC2_9ACAR	N/A	N/A	Putative wd40 repeat stress protein/actin (Fragment) OS=Amblyomma parvum PE=2 SV=1	TRUE	0.511584	0.62722	18668.7	15880.3	23190.8	16337.8	10822.6	1307.37	2788.47	1.17559	0.070257	0.850634	-0.233389
867	888	tr|A0A1D8R8Q9|A0A1D8R8Q9_NEORS	N/A	N/A	60 kDa chaperonin (Fragment) OS=Neorickettsia risticii OX=950 PE=3 SV=1	TRUE	-0.508732	0.6291	33374.9	63473.2	5053.07	12454.4	56957.3	103717	-30098.4	0.52581	-0.279171	1.90183	0.927386
868	698	tr|A0A023FV38|A0A023FV38_9ACAR	N/A	N/A	Putative 15-hydroxyprostaglandin dehydrogenase OS=Amblyomma parvum PE=2 SV=1	TRUE	0.508699	0.62912	138887	126727	142153	145383	23847.2	41436.2	12160	1.09595	0.0397925	0.912447	-0.132188
869	193	tr|A0A090X8K1|A0A090X8K1_IXORI	N/A	N/A	Putative polyubiquitin (Fragment) OS=Ixodes ricinus PE=2 SV=1	TRUE	0.505003	0.63156	781298	707324	700492	703566	204584	209696	73973.5	1.10458	0.043198	0.90532	-0.143501
870	265	tr|L7LYL1|L7LYL1_9ACAR	N/A	N/A	Eukaryotic translation initiation factor 3 subunit D OS=Rhipicephalus pulchellus PE=2 SV=1	TRUE	-0.488808	0.64233	108414	113545	108168	109855	5719.63	20197.4	-5130.45	0.954816	-0.0200805	1.04732	0.0667059
871	882	tr|V5IFQ2|V5IFQ2_IXORI	N/A	N/A	Putative microtubule associated complex (Fragment) OS=Ixodes ricinus PE=2 SV=1	TRUE	0.476608	0.6505	4200.9	3479.95	4954.3	3220.23	2667.19	1427.83	720.946	1.20717	0.0817689	0.828383	-0.27163
872	635	tr|G3MLR0|G3MLR0_9ACAR	N/A	N/A	Uncharacterized protein OS=Amblyomma maculatum PE=2 SV=1	TRUE	-0.44764	0.67012	9994.69	12374.9	11287.6	14430.9	7379.31	7657.79	-2380.25	0.807656	-0.0927738	1.23815	0.308188
873	352	tr|A0A131YTB9|A0A131YTB9_RHIAP	N/A	N/A	Uncharacterized protein OS=Rhipicephalus appendiculatus PE=4 SV=1	TRUE	0.400163	0.70289	96698.6	90700.7	90002.8	91956.6	22228.1	20112.9	5997.82	1.06613	0.0278092	0.937974	-0.0923801
874	764	tr|A0A224Z5T2|A0A224Z5T2_9ACAR	N/A	N/A	Peroxiredoxin (Alkyl hydroperoxide reductase subunit C) OS=Rhipicephalus zambeziensis PE=4 SV=1	TRUE	-0.399498	0.70336	125762	126972	125316	127898	1253.42	5926.72	-1210.04	0.99047	-0.00415869	1.00962	0.0138149
875	714	tr|A0A131XHL7|A0A131XHL7_9ACAR	N/A	N/A	Putative chromatin remodeling complex wstf-iswi small subunit (Fragment) OS=Hyalomma excavatum PE=2 SV=1	TRUE	-0.374299	0.72105	14668	17260.3	15429.8	12335.5	2749.58	13576.2	-2592.36	0.849808	-0.0706791	1.17674	0.234791
876	269	tr|L7M3E5|L7M3E5_9ACAR	N/A	N/A	Putative cytochrome c oxidase subunit iv/cox5b OS=Rhipicephalus pulchellus PE=2 SV=1	TRUE	0.338546	0.74648	447616	410268	444869	407642	19854	219741	37347.8	1.09103	0.0378377	0.916563	-0.125694
877	58	tr|A0A131Z678|A0A131Z678_RHIAP	N/A	N/A	TIL domain containing protein (Fragment) OS=Rhipicephalus appendiculatus PE=4 SV=1	TRUE	-0.318697	0.76076	270049	273167	271665	269058	9821.78	16919.4	-3117.42	0.988588	-0.00498473	1.01154	0.0165589
878	166	tr|A0A131Z614|A0A131Z614_RHIAP	N/A	N/A	ATP synthase subunit alpha OS=Rhipicephalus appendiculatus PE=3 SV=1	TRUE	0.316033	0.76268	189389	187976	188657	186532	3236.97	8333.94	1412.75	1.00752	0.00325176	0.992541	-0.0108021
879	173	tr|V5HH33|V5HH33_IXORI	N/A	N/A	Putative 26s proteasome regulatory complex atpase rpt5 OS=Ixodes ricinus PE=2 SV=1	TRUE	-0.313736	0.76434	132719	136446	131965	144512	4026.54	23415.6	-3727.08	0.972685	-0.0120279	1.02808	0.039956
880	454	tr|L7M975|L7M975_9ACAR	N/A	N/A	Serine/threonine-protein phosphatase OS=Rhipicephalus pulchellus PE=2 SV=1	TRUE	0.296425	0.7769	25659.5	18301.9	2560.16	17569.6	47206.5	15358.3	7357.57	1.40201	0.146752	0.713261	-0.487498
881	797	tr|L7LZG6|L7LZG6_9ACAR	N/A	N/A	Putative nuclear transport factor-2 OS=Rhipicephalus pulchellus PE=2 SV=1	TRUE	0.261754	0.80227	73388.7	72443.3	72811.5	73418.8	6394.69	3358.68	945.334	1.01305	0.00563058	0.987119	-0.0187044
882	673	tr|V5HMC9|V5HMC9_IXORI	N/A	N/A	Putative small ribonucleoprotein particle protein smg (Fragment) OS=Ixodes ricinus PE=2 SV=1	TRUE	0.244354	0.8151	7668.09	7206.86	8495.37	8012.99	2091.09	3143.02	461.228	1.064	0.026941	0.939851	-0.089496
883	386	tr|A0A224YKA4|A0A224YKA4_9ACAR	N/A	N/A	Crystallin alpha B OS=Rhipicephalus zambeziensis PE=3 SV=1	TRUE	-0.22478	0.82961	88273.4	90932.5	89867.3	96845.4	9055.49	21858.9	-2659.19	0.970756	-0.0128897	1.03012	0.0428188
884	716	tr|V5HYY5|V5HYY5_IXORI	N/A	N/A	Uncharacterized protein (Fragment) OS=Ixodes ricinus PE=2 SV=1	TRUE	-0.213206	0.83823	3792.18	3907.33	4002.54	3630.88	820.523	702.589	-115.155	0.970528	-0.0129917	1.03037	0.0431576
885	685	tr|B7QLF1|B7QLF1_IXOSC	N/A	N/A	Putative uncharacterized protein (Fragment) (Fragment) OS=Ixodes scapularis GN=8043039 PE=4 SV=1	TRUE	-0.212598	0.83868	19077.4	20292.6	23549	20445.9	11422.9	430.621	-1215.11	0.94012	-0.0268165	1.06369	0.0890825
886	334	tr|G3MNQ4|G3MNQ4_9ACAR	N/A	N/A	Uncharacterized protein OS=Amblyomma maculatum PE=2 SV=1	TRUE	-0.180993	0.86233	185999	188967	186107	186627	5304.38	32361.4	-2967.67	0.984295	-0.00687459	1.01596	0.0228369
887	519	tr|L7M4L8|L7M4L8_9ACAR	N/A	N/A	Putative 60s ribosomal protein l7 OS=Rhipicephalus pulchellus PE=2 SV=1	TRUE	-0.176374	0.8658	161350	161964	161177	160168	2331.66	6562.38	-614.16	0.996208	-0.00164995	1.00381	0.00548103
888	579	tr|G3MNE3|G3MNE3_9ACAR	N/A	N/A	Uncharacterized protein OS=Amblyomma maculatum PE=2 SV=1	TRUE	0.172351	0.86883	14295.4	13154.1	14054.8	7209.03	1166.14	13192.4	1141.3	1.08676	0.0361349	0.920164	-0.120038
889	491	tr|A0A023GFY8|A0A023GFY8_9ACAR	N/A	N/A	Putative actin-binding cytoskeleton protein filamin (Fragment) OS=Amblyomma triste PE=2 SV=1	TRUE	0.161694	0.87685	102848	102558	103150	102255	2329.75	2733.32	290.361	1.00283	0.00122784	0.997177	-0.00407879
890	43	tr|L7M1L5|L7M1L5_9ACAR	N/A	N/A	Citrate synthase OS=Rhipicephalus pulchellus PE=2 SV=1	TRUE	-0.159708	0.87835	1.37234e+06	1.40231e+06	1.33639e+06	1.38259e+06	371290	55318.4	-29976.2	0.978624	-0.00938425	1.02184	0.0311738
891	707	tr|L7M3M8|L7M3M8_9ACAR	N/A	N/A	Putative ca2+/calmodulin-dependent protein phosphat OS=Rhipicephalus pulchellus PE=2 SV=1	TRUE	0.15451	0.88227	15849.7	15089.2	16100	17011.7	1053.52	9787.03	760.464	1.0504	0.0213539	0.95202	-0.070936
892	423	tr|A0A224Z062|A0A224Z062_9ACAR	N/A	N/A	Succinate--CoA ligase [ADP-forming] subunit beta, mitochondrial OS=Rhipicephalus zambeziensis PE=3 SV=1	TRUE	-0.149325	0.88619	81206.6	83390.7	80864.9	82684.9	3731.72	29014.7	-2184.15	0.973808	-0.0115266	1.0269	0.0382904
893	540	tr|L7MK98|L7MK98_9ACAR	N/A	N/A	Uncharacterized protein (Fragment) OS=Rhipicephalus pulchellus PE=2 SV=1	TRUE	0.146322	0.88846	76270.5	73658.1	76608.5	89161.3	15860.7	31991.9	2612.41	1.03547	0.0151361	0.965748	-0.0502812
894	718	tr|A0A131Z6V3|A0A131Z6V3_RHIAP	N/A	N/A	Aubergine (Fragment) OS=Rhipicephalus appendiculatus PE=3 SV=1	TRUE	-0.113139	0.91361	2195.84	2342.68	1227.91	2322.89	2154.37	1447.92	-146.839	0.93732	-0.0281121	1.06687	0.0933863
895	713	tr|A0A131XD49|A0A131XD49_9ACAR	N/A	N/A	Putative 26s proteasome regulatory complex subunit OS=Hyalomma excavatum PE=2 SV=1	TRUE	-0.108662	0.91701	10538.9	10718.9	10132.7	10466	1774.36	2798.15	-180.014	0.983206	-0.00735552	1.01708	0.0244345
896	548	tr|L7M4S8|L7M4S8_9ACAR	N/A	N/A	Signal peptidase complex catalytic subunit SEC11 OS=Rhipicephalus pulchellus PE=2 SV=1	TRUE	0.107199	0.91813	66403.6	66092.1	66575.4	66671.5	4842.39	3212.93	311.486	1.00471	0.00204198	0.995309	-0.00678331
897	330	tr|L7MB61|L7MB61_9ACAR	N/A	N/A	Serine/threonine-protein phosphatase OS=Rhipicephalus pulchellus PE=2 SV=1	TRUE	-0.0920556	0.92965	84864.2	85166.8	84438.7	87618.6	3018.65	5839.12	-302.552	0.996448	-0.00154556	1.00357	0.00513425
898	465	tr|A0A224Z3W5|A0A224Z3W5_9ACAR	N/A	N/A	Eukaryotic translation initiation factor 3 subunit I OS=Rhipicephalus zambeziensis PE=3 SV=1	TRUE	-0.088611	0.93227	45506.6	45744.8	45378.9	47453.8	1864.32	5043.76	-238.243	0.994792	-0.00226776	1.00524	0.00753332
899	422	tr|A0A224YI66|A0A224YI66_9ACAR	N/A	N/A	Proteasome subunit beta OS=Rhipicephalus zambeziensis PE=3 SV=1	TRUE	0.0737562	0.9436	31420.5	30246.2	31653	15461.5	7706.35	30898.1	1174.37	1.03883	0.0165432	0.962624	-0.0549554
900	884	tr|A0A1E1XRG3|A0A1E1XRG3_9ACAR	N/A	N/A	Putative dynamin-like gtp binding protein (Fragment) OS=Amblyomma sculptum PE=2 SV=1	TRUE	-0.0683702	0.94771	2009.32	2046.47	1857.39	2166.78	675.026	851.666	-37.1502	0.981847	-0.00795632	1.01849	0.0264303
901	37	tr|A0A224YK95|A0A224YK95_9ACAR	N/A	N/A	Creatine kinase OS=Rhipicephalus zambeziensis PE=3 SV=1	TRUE	0.061815	0.95272	2.73931e+06	2.71676e+06	3.05255e+06	2.71734e+06	723743	93572.1	22555.3	1.0083	0.00359075	0.991766	-0.0119282
902	696	tr|V5HP38|V5HP38_IXORI	N/A	N/A	Putative calcium-transporting atpase sarcoplasmic/endoplasmic reticulum type (Fragment) OS=Ixodes ricinus PE=2 SV=1	TRUE	0.0592501	0.95468	15298.9	14724.2	15137	8566.38	9549.28	16888.1	574.755	1.03903	0.0166301	0.962432	-0.0552438
903	25	tr|L7M6W4|L7M6W4_9ACAR	N/A	N/A	Putative 60 kDa heat shock protein OS=Rhipicephalus pulchellus PE=2 SV=1	TRUE	-0.0522743	0.96001	71866.7	72160.1	72926.1	70354	9606.75	5809.22	-293.432	0.995934	-0.00176961	1.00408	0.00587853
904	251	tr|L7MGT9|L7MGT9_9ACAR	N/A	N/A	Putative rpt3 (Fragment) OS=Rhipicephalus pulchellus PE=2 SV=1	TRUE	-0.0458932	0.96488	114520	114674	116103	114566	5611.68	3703.95	-154.289	0.998655	-0.000584718	1.00135	0.00194239
905	412	tr|B7PNX6|B7PNX6_IXOSC	N/A	N/A	20S proteasome, regulatory subunit beta, putative OS=Ixodes scapularis GN=8051169 PE=4 SV=1	TRUE	-0.034015	0.97397	40529.9	40644.2	41600.9	41103.4	6026.42	2971.08	-114.274	0.997188	-0.00122276	1.00282	0.00406193
906	294	tr|L7MGN6|L7MGN6_9ACAR	N/A	N/A	Putative tomosyn (Fragment) OS=Rhipicephalus pulchellus PE=2 SV=1	TRUE	-0.0279178	0.97863	44785	45152.8	45426.6	54322.8	3585.36	26109.5	-367.88	0.991853	-0.00355288	1.00821	0.0118024
907	844	tr|L7M2W1|L7M2W1_9ACAR	N/A	N/A	Putative der and-48 ribosomal protein l32 OS=Rhipicephalus pulchellus PE=2 SV=1	TRUE	-0.0258488	0.98022	15150.4	15277.2	14602.3	15886.7	5123.78	8362.27	-126.752	0.991703	-0.00361829	1.00837	0.0120197
908	550	tr|A0A224YS24|A0A224YS24_9ACAR	N/A	N/A	1-pyrroline-5-carboxylate dehydrogenase OS=Rhipicephalus zambeziensis PE=3 SV=1	TRUE	-0.0144575	0.98893	20410.2	20464.1	21594.1	20572.7	6160.68	4184.92	-53.8373	0.997369	-0.00114406	1.00264	0.00380048

## Sheet: Tick SGI RsJ vs. SGI RsS
										RsS	RsJ
Row	Index	Peak Name	m/z	Ret. Time	Group	SPECIES	Use	t-value	p-value	Mean 1	Mean 2	Median 1	Median 2	Sigma 1	Sigma 2	Delta	Fold Change	Log (Fold Change)	Fold Change (RsJ/RsS)	Log (Fold Change)
1	139	tr|J9JHF7|J9JHF7_CANLF	N/A	N/A	Uncharacterized protein OS	Canis lupus familiaris GN	TRUE	391.63	1.8707e-14	3.98067e+07	2.02178e+06	3.97895e+07	2.036e+06	189117	38330.7	3.77849e+07	19.6889	1.29422	0.0507901	-4.29931
2	130	tr|A0A224YQW1|A0A224YQW1_9ACAR	N/A	N/A	Serine protease inhibitor OS	Rhipicephalus zambeziensis PE	TRUE	153.254	5.2065e-12	650312	85246	649239	86029.1	6690.13	3101.92	565066	7.62865	0.882448	0.131085	-2.93143
3	366	tr|A0A131XNT8|A0A131XNT8_9ACAR	N/A	N/A	Putative glutathione s-transferase OS	Hyalomma excavatum PE	TRUE	152.321	5.4007e-12	693131	139129	693256	138688	4255.98	5899.13	554002	4.98193	0.697398	0.200725	-2.31671
4	250	tr|C9W1B4|C9W1B4_RHISA	N/A	N/A	Hypothetical secreted protein (Fragment) OS	Rhipicephalus sanguineus PE	TRUE	127.917	1.5393e-11	581599	119066	581953	119159	3354.47	6406.72	462533	4.88467	0.688835	0.204722	-2.28826
5	59	tr|A0A131YM09|A0A131YM09_RHIAP	N/A	N/A	Alpha-N-acetylgalactosaminidase OS	Rhipicephalus appendiculatus PE	TRUE	-127.495	1.5701e-11	1.46917e+06	4.63281e+06	1.46403e+06	4.63044e+06	21829.3	44568.9	-3.16364e+06	0.317122	-0.498773	3.15336	1.65689
6	19	tr|A0A224Z2K0|A0A224Z2K0_9ACAR	N/A	N/A	Tropomyosin OS	Rhipicephalus zambeziensis PE	TRUE	118.561	2.4275e-11	4.26721e+06	1.12531e+06	4.26036e+06	1.12495e+06	48660.7	21004.3	3.1419e+06	3.79203	0.578871	0.263711	-1.92297
7	323	tr|A0A224YGN2|A0A224YGN2_9ACAR	N/A	N/A	Ixoderin OS	Rhipicephalus zambeziensis PE	TRUE	-101.408	6.1975e-11	59905.7	547004	60300.4	545246	3085.56	9097.73	-487098	0.109516	-0.960522	9.13108	3.19078
8	49	sp|P60524|HBB_CANLF	N/A	N/A	Hemoglobin subunit beta OS	Canis lupus familiaris GN	TRUE	89.2241	1.3352e-10	4.61667e+07	1.3964e+06	4.62745e+07	1.3927e+06	1.0032e+06	26507.8	4.47703e+07	33.0612	1.51932	0.0302469	-5.04707
9	594	tr|V5H340|V5H340_IXORI	N/A	N/A	Putative vitellogenin-1 OS	Ixodes ricinus PE	TRUE	81.2451	2.3414e-10	114130	23251.5	114192	23362.9	1968.73	1062.51	90878.5	4.9085	0.690949	0.203728	-2.29528
10	125	tr|A0A023GME3|A0A023GME3_9ACAR	N/A	N/A	Putative vitellogenin-1 (Fragment) OS	Amblyomma triste PE	TRUE	76.3454	3.3996e-10	1.89261e+06	299088	1.90783e+06	300276	39215.3	14311.6	1.59353e+06	6.32795	0.801263	0.158029	-2.66174
11	32	tr|J9P430|J9P430_CANLF	N/A	N/A	Transferrin OS	Canis lupus familiaris GN	TRUE	76.1798	3.4442e-10	1.4548e+06	120679	1.44913e+06	124709	27076.7	22218.1	1.33412e+06	12.0552	1.08117	0.082952	-3.59158
12	683	tr|A0A131YEJ6|A0A131YEJ6_RHIAP	N/A	N/A	Uncharacterized protein OS	Rhipicephalus appendiculatus PE	TRUE	75.9511	3.5068e-10	339309	41965.9	338382	41491.1	7737.9	1196.48	297343	8.08535	0.907699	0.12368	-3.01531
13	838	tr|L7LR20|L7LR20_9ACAR	N/A	N/A	Putative salivary lipocalin OS	Rhipicephalus pulchellus PE	TRUE	74.8309	3.8335e-10	103555	14217.9	103503	14204.5	2191	949.054	89337.4	7.28344	0.862336	0.137298	-2.86462
14	136	tr|E2RCC8|E2RCC8_CANLF	N/A	N/A	Immunoglobulin heavy constant mu OS	Canis lupus familiaris GN	TRUE	69.383	6.0307e-10	831723	27762.6	840732	27646.5	22535.9	5403.18	803961	29.9584	1.47652	0.0333796	-4.90489
15	458	tr|A0A1E1XNG1|A0A1E1XNG1_9ACAR	N/A	N/A	Putative diacetyl reductase/l-xylulose reductase (Fragment) OS	Amblyomma sculptum PE	TRUE	69.1174	6.1709e-10	506867	97075.2	510443	98261.2	10052	6290.06	409792	5.22138	0.717785	0.19152	-2.38443
16	126	tr|A0A224Z4V4|A0A224Z4V4_9ACAR	N/A	N/A	Calponin OS	Rhipicephalus zambeziensis PE	TRUE	66.1055	8.0596e-10	3.63816e+06	1.62453e+06	3.63605e+06	1.63136e+06	34567.7	50164.9	2.01363e+06	2.23951	0.350154	0.446526	-1.16319
17	483	tr|L7MBE1|L7MBE1_9ACAR	N/A	N/A	Putative ixoderin OS	Rhipicephalus pulchellus PE	TRUE	-64.0407	9.7477e-10	99758.6	377441	99208.9	379512	2782.1	8213.67	-277682	0.264303	-0.577898	3.78354	1.91974
18	225	tr|L7M0V0|L7M0V0_9ACAR	N/A	N/A	Putative heat shock-related protein OS	Rhipicephalus pulchellus PE	TRUE	-63.8173	9.9539e-10	794241	1.51942e+06	791133	1.5208e+06	8462.2	21092.5	-725178	0.522727	-0.281725	1.91305	0.935871
19	560	tr|A0A131YHN4|A0A131YHN4_RHIAP	N/A	N/A	Pancreatic trypsin inhibitor OS	Rhipicephalus appendiculatus PE	TRUE	-63.4293	1.0324e-09	62164.2	352599	61542.8	352693	3808.91	8328.04	-290434	0.176303	-0.75374	5.67206	2.50387
20	344	tr|A0A224Y1R0|A0A224Y1R0_9ACAR	N/A	N/A	Basic tail secreted protein OS	Rhipicephalus zambeziensis PE	TRUE	-62.1069	1.1714e-09	321042	935103	323789	934685	9217.97	17494.4	-614060	0.343323	-0.464297	2.91271	1.54236
21	342	tr|F1PTX4|F1PTX4_CANLF	N/A	N/A	Keratin, type II cytoskeletal 2 epidermal OS	Canis lupus familiaris GN	TRUE	-60.7547	1.3365e-09	204515	418985	205751	418338	3962.41	5843.44	-214470	0.48812	-0.311474	2.04868	1.03469
22	507	tr|L7LYB6|L7LYB6_9ACAR	N/A	N/A	Uncharacterized protein OS	Rhipicephalus pulchellus PE	TRUE	58.9098	1.6077e-09	84310.4	6365.12	84564.1	6158.79	2329.29	1255.83	77945.3	13.2457	1.12207	0.0754962	-3.72745
23	767	tr|A0A131XQ18|A0A131XQ18_9ACAR	N/A	N/A	Putative fatty acid-binding protein fabp (Fragment) OS	Hyalomma excavatum PE	TRUE	58.9063	1.6083e-09	335306	66750.7	337239	66087.3	7719.83	4852.11	268555	5.02325	0.700985	0.199074	-2.32862
24	267	tr|A0A224YGV9|A0A224YGV9_9ACAR	N/A	N/A	Serine protease inhibitor OS	Rhipicephalus zambeziensis PE	TRUE	58.7981	1.6261e-09	295922	103587	295363	102480	2796.2	5914.57	192336	2.85676	0.455873	0.350047	-1.51438
25	396	tr|C9W1Q4|C9W1Q4_RHISA	N/A	N/A	Putative thyropin OS	Rhipicephalus sanguineus PE	TRUE	-57.3202	1.894e-09	114927	297285	114402	297671	3867.03	5052.82	-182358	0.386589	-0.41275	2.58672	1.37113
26	800	tr|L7LTJ2|L7LTJ2_9ACAR	N/A	N/A	Putative bitil peptide OS	Rhipicephalus pulchellus PE	TRUE	-56.8728	1.985e-09	4060.95	61474.7	3980.74	61186.2	917.195	1798.67	-57413.8	0.0660589	-1.18007	15.138	3.9201
27	194	tr|L7M5D0|L7M5D0_9ACAR	N/A	N/A	Putative synaptic vesicle membrane protein vat-1 OS	Rhipicephalus pulchellus PE	TRUE	56.8692	1.9858e-09	172138	6154.94	170763	6942.46	5358.86	2314.64	165983	27.9675	1.44665	0.0357558	-4.80568
28	202	tr|A0A1E1XJX4|A0A1E1XJX4_9ACAR	N/A	N/A	Putative secreted protein (Fragment) OS	Amblyomma sculptum PE	TRUE	55.556	2.284e-09	1.13626e+06	359070	1.13199e+06	359895	22916.4	16050.9	777187	3.16444	0.500297	0.316011	-1.66195
29	336	tr|L7M673|L7M673_9ACAR	N/A	N/A	Putative trna selenocysteine 1-associated protein 1 OS	Rhipicephalus pulchellus PE	TRUE	54.8532	2.465e-09	432688	157189	436306	157156	9860.02	1918.64	275499	2.75267	0.439753	0.363284	-1.46083
30	783	tr|A0A224YL08|A0A224YL08_9ACAR	N/A	N/A	TIL domain containing protein OS	Rhipicephalus zambeziensis PE	TRUE	-53.4896	2.8662e-09	43245.9	228111	43638.3	227258	3379.87	6029.48	-184865	0.189583	-0.722201	5.27473	2.3991
31	4	tr|L7M2A4|L7M2A4_9ACAR	N/A	N/A	Putative alpha actinin OS	Rhipicephalus pulchellus PE	TRUE	52.8857	3.0678e-09	2.66824e+06	1.51047e+06	2.67273e+06	1.49703e+06	21967	37874.3	1.15777e+06	1.76649	0.247112	0.566093	-0.820888
32	11	tr|A0A034WXH7|A0A034WXH7_RHIMP	N/A	N/A	Vitellogenin 4 (Fragment) OS	Rhipicephalus microplus PE	TRUE	51.7002	3.5139e-09	7.94605e+06	1.2729e+06	8.02027e+06	1.28303e+06	251666	57487.5	6.67316e+06	6.2425	0.795359	0.160192	-2.64212
33	383	tr|A0A0A7DS56|A0A0A7DS56_RHIMP	N/A	N/A	Pyruvate kinase OS	Rhipicephalus microplus PE	TRUE	50.9312	3.8439e-09	394412	218482	395578	217930	3228.51	6107.76	175930	1.80524	0.256535	0.553943	-0.852189
34	116	tr|G1K2D9|G1K2D9_CANLF	N/A	N/A	Haptoglobin OS	Canis lupus familiaris GN	TRUE	50.4725	4.0578e-09	1.66788e+06	94897.2	1.65778e+06	92635.6	49317.8	38116.1	1.57299e+06	17.5757	1.24491	0.0568968	-4.13551
35	748	tr|A0A131XF49|A0A131XF49_9ACAR	N/A	N/A	Putative secreted salivary gland peptide OS	Hyalomma excavatum PE	TRUE	50.2817	4.1509e-09	173941	6871.72	174329	7179.77	5465.53	3779.97	167069	25.3125	1.40334	0.0395061	-4.66178
36	14	tr|A0A224YPA7|A0A224YPA7_9ACAR	N/A	N/A	Heat shock 70kDa protein 1/8 OS	Rhipicephalus zambeziensis PE	TRUE	50.0774	4.2533e-09	1.88269e+06	1.10644e+06	1.88866e+06	1.10729e+06	29038.1	10858.2	776245	1.70157	0.230849	0.587693	-0.766865
37	163	tr|A0A224YUP2|A0A224YUP2_9ACAR	N/A	N/A	Collagen type IV alpha OS	Rhipicephalus zambeziensis PE	TRUE	-49.8756	4.3574e-09	301096	703892	303856	707122	10176	12543.4	-402796	0.427758	-0.368801	2.33777	1.22513
38	101	tr|A0A224YB78|A0A224YB78_9ACAR	N/A	N/A	Lipocalin OS	Rhipicephalus zambeziensis PE	TRUE	49.5722	4.5195e-09	1.99431e+06	406611	1.99784e+06	410756	59318.1	24176.8	1.5877e+06	4.90471	0.690613	0.203886	-2.29417
39	364	tr|A0A034WXN6|A0A034WXN6_RHIMP	N/A	N/A	Hemelipoprotein HeLp 2 (Fragment) OS	Rhipicephalus microplus PE	TRUE	48.7037	5.024e-09	965091	476122	965510	476671	17168.3	10413	488969	2.02698	0.30685	0.493344	-1.01933
40	666	tr|A0A131YXW9|A0A131YXW9_RHIAP	N/A	N/A	Beat protein like 1 OS	Rhipicephalus appendiculatus PE	TRUE	45.6508	7.4017e-09	195568	65952.9	194306	66157.1	5033.04	2629.48	129615	2.96526	0.472063	0.337238	-1.56816
41	264	tr|A0A224YCQ3|A0A224YCQ3_9ACAR	N/A	N/A	Lipocalin (Fragment) OS	Rhipicephalus zambeziensis PE	TRUE	-45.2993	7.7522e-09	1.8241e+06	4.88065e+06	1.82544e+06	4.84763e+06	86828.9	103306	-3.05655e+06	0.373741	-0.42743	2.67565	1.41989
42	51	tr|A0A224Z095|A0A224Z095_9ACAR	N/A	N/A	Heat shock 70kDa protein 5 OS	Rhipicephalus zambeziensis PE	TRUE	45.0314	8.0324e-09	803514	300778	801701	305130	13669.7	17654.7	502736	2.67145	0.426747	0.374328	-1.41762
43	393	tr|A0A224Z2W7|A0A224Z2W7_9ACAR	N/A	N/A	Large subunit ribosomal protein LP1 OS	Rhipicephalus zambeziensis PE	TRUE	44.7734	8.3134e-09	142787	51875.8	141679	52066.1	2378.79	3291.32	90911.7	2.75249	0.439725	0.363308	-1.46074
44	874	tr|A0A224YML8|A0A224YML8_9ACAR	N/A	N/A	Lipocalin OS	Rhipicephalus zambeziensis PE	TRUE	44.2094	8.9685e-09	83656.1	4663.84	83463.6	4341.35	3179.21	1631.83	78992.3	17.9372	1.25375	0.0557502	-4.16488
45	494	tr|A0A023FXL4|A0A023FXL4_9ACAR	N/A	N/A	Protein disulfide-isomerase OS	Amblyomma parvum PE	TRUE	43.6825	9.6356e-09	215513	20313.7	214573	21271.6	7505.64	4851.67	195199	10.6093	1.02568	0.0942573	-3.40725
46	362	tr|A0A131YQ21|A0A131YQ21_RHIAP	N/A	N/A	Glutathione S-transferase OS	Rhipicephalus appendiculatus PE	TRUE	43.1648	1.0348e-08	103003	41412	102665	41947	2201.37	1815.98	61590.5	2.48726	0.395721	0.402049	-1.31456
47	730	tr|B7P5Q1|B7P5Q1_IXOSC	N/A	N/A	Cuticle protein, putative OS	Ixodes scapularis GN	TRUE	-43.1632	1.035e-08	3406.27	277942	2563.76	278471	2735.04	12423.3	-274536	0.0122553	-1.91168	81.5973	6.35045
48	856	tr|L7M132|L7M132_9ACAR	N/A	N/A	Uncharacterized protein OS	Rhipicephalus pulchellus PE	TRUE	-42.6401	1.1134e-08	15105.4	47881.3	15115.1	47532.2	720.114	1358.24	-32775.9	0.315476	-0.501033	3.16981	1.6644
49	247	tr|A0A131Z9A0|A0A131Z9A0_RHIAP	N/A	N/A	BIGH3 (Fragment) OS	Rhipicephalus appendiculatus PE	TRUE	-41.1224	1.3829e-08	38455.5	222646	40150.1	225806	5761.62	6859.48	-184191	0.17272	-0.762657	5.78971	2.53349
50	121	tr|A0A0C9SCJ0|A0A0C9SCJ0_AMBAM	N/A	N/A	Putative 60 kDa chaperonin (Fragment) OS	Amblyomma americanum PE	TRUE	-40.5613	1.5013e-08	372004	797077	371966	800656	3672.19	20635.3	-425072	0.466711	-0.330952	2.14265	1.0994
51	459	tr|E1CAX9|E1CAX9_HAELO	N/A	N/A	Vitellogenin-1 OS	Haemaphysalis longicornis GN	TRUE	40.3619	1.5463e-08	2.76194e+06	561246	2.75684e+06	514401	38831.7	101900	2.20069e+06	4.92109	0.692061	0.203207	-2.29898
52	561	tr|V9VL04|V9VL04_RHIMP	N/A	N/A	Serine protease inhibitor 6 RmS6 OS	Rhipicephalus microplus GN	TRUE	40.2453	1.5733e-08	785693	170992	794830	168945	29573.8	7652.03	614700	4.5949	0.662276	0.217633	-2.20003
53	773	tr|A0A1E1X172|A0A1E1X172_9ACAR	N/A	N/A	Putative dosage compensation complex subunit mle OS	Amblyomma aureolatum PE	TRUE	39.8698	1.664e-08	408656	126061	409515	127085	9876.08	10169.5	282595	3.24174	0.510778	0.308477	-1.69677
54	355	tr|A0A131X8J9|A0A131X8J9_9ACAR	N/A	N/A	Putative glutathione s-transferase OS	Hyalomma excavatum PE	TRUE	38.7454	1.9744e-08	251627	38578.6	250313	39794.4	8337.97	7170.78	213049	6.52245	0.814411	0.153317	-2.70541
55	523	tr|C9W1T1|C9W1T1_RHISA	N/A	N/A	Cement-like protein (Fragment) OS	Rhipicephalus sanguineus PE	TRUE	-38.1872	2.1534e-08	549640	3.51446e+06	550366	3.52816e+06	26808.3	152947	-2.96482e+06	0.156394	-0.805781	6.39412	2.67675
56	814	tr|A0A224YL44|A0A224YL44_9ACAR	N/A	N/A	TIL domain containing protein OS	Rhipicephalus zambeziensis PE	TRUE	-38.1023	2.1822e-08	6830.75	200240	7720.15	199708	4171.14	9255.65	-193410	0.0341127	-1.46708	29.3146	4.87355
57	878	tr|A0A1E1XGR0|A0A1E1XGR0_9ACAR	N/A	N/A	Putative synaptic vesicle protein synapsin (Fragment) OS	Amblyomma aureolatum PE	TRUE	-37.9964	2.2188e-08	50293.6	107569	49971.2	107968	1021.15	2836.59	-57275.7	0.467546	-0.330176	2.13883	1.09682
58	756	tr|G3MLX5|G3MLX5_9ACAR	N/A	N/A	Uncharacterized protein OS	Amblyomma maculatum PE	TRUE	-37.6405	2.3472e-08	113842	450558	113878	448980	5041.88	17166	-336716	0.25267	-0.597447	3.95774	1.98468
59	681	tr|A0A224YVZ3|A0A224YVZ3_9ACAR	N/A	N/A	Collagen type IV alpha OS	Rhipicephalus zambeziensis PE	TRUE	-37.3611	2.4541e-08	36567.4	88043.2	36358.5	88981.3	1338.82	2408.48	-51475.8	0.415335	-0.381602	2.4077	1.26765
60	75	tr|A0A224Z295|A0A224Z295_9ACAR	N/A	N/A	Protein disulfide-isomerase OS	Rhipicephalus zambeziensis PE	TRUE	36.6113	2.7703e-08	594543	264725	595814	260391	14513	10676.8	329817	2.24589	0.351388	0.445259	-1.16728
61	479	tr|A0A224Y6Z2|A0A224Y6Z2_9ACAR	N/A	N/A	7DB family member OS	Rhipicephalus zambeziensis PE	TRUE	-35.9632	3.0823e-08	12868.2	149112	13060.8	149962	1174.65	7485.24	-136244	0.0862987	-1.064	11.5877	3.53452
62	620	tr|A0A224YJB7|A0A224YJB7_9ACAR	N/A	N/A	Alpha-2-macroglobiln splicing variant 1 OS	Rhipicephalus zambeziensis PE	TRUE	35.9498	3.0892e-08	244644	109217	246479	109625	6997.96	2791.55	135427	2.23997	0.350243	0.446434	-1.16348
63	847	tr|A0A023FXY9|A0A023FXY9_9ACAR	N/A	N/A	Putative hydroxyacyl-coa dehydrogenase/enoyl-coa hydratase OS	Amblyomma parvum PE	TRUE	35.7854	3.175e-08	129899	65963.2	130268	65883.6	3316.71	1329.63	63936	1.96927	0.294305	0.507803	-0.977659
64	197	tr|A0A131YYA2|A0A131YYA2_RHIAP	N/A	N/A	Isocitrate dehydrogenase [NADP] OS	Rhipicephalus appendiculatus PE	TRUE	35.6292	3.2591e-08	77258.2	16708.2	77928.2	16959	1829.39	2864.59	60550	4.62396	0.665014	0.216265	-2.20913
65	703	tr|A0A224Z454|A0A224Z454_9ACAR	N/A	N/A	Nidogen OS	Rhipicephalus zambeziensis PE	TRUE	-35.3131	3.4373e-08	2920.7	45335.1	2595.75	45394.8	1297.69	2021.52	-42414.4	0.0644248	-1.19095	15.522	3.95624
66	86	tr|A0A131XGU0|A0A131XGU0_9ACAR	N/A	N/A	Putative translation initiation factor 2c eif-2c (Fragment) OS	Hyalomma excavatum PE	TRUE	-35.2814	3.4558e-08	216204	537780	220569	536723	15430.8	9705.33	-321576	0.402031	-0.39574	2.48737	1.31462
67	785	tr|A0A023G883|A0A023G883_9ACAR	N/A	N/A	Putative glutathione s-transferase ixodes scapularis glutathione s-transferase (Fragment) OS	Amblyomma triste PE	TRUE	34.1186	4.2218e-08	601126	33772.7	598466	38143	27027.2	19380.7	567354	17.7992	1.2504	0.0561824	-4.15374
68	752	tr|A0A131Z560|A0A131Z560_RHIAP	N/A	N/A	Enolase OS	Rhipicephalus appendiculatus PE	TRUE	33.6835	4.5581e-08	241605	96862.7	241812	97163.8	7997.26	3147.16	144742	2.4943	0.396949	0.400914	-1.31863
69	823	tr|A0A131YNG2|A0A131YNG2_RHIAP	N/A	N/A	Pancreatic trypsin inhibitor OS	Rhipicephalus appendiculatus PE	TRUE	-33.6773	4.5631e-08	16457.7	89256.7	16375.3	90395	1289.81	4126.44	-72799	0.184386	-0.734272	5.42341	2.4392
70	761	tr|J9PAW5|J9PAW5_CANLF	N/A	N/A	Uncharacterized protein OS	Canis lupus familiaris PE	TRUE	33.4302	4.7683e-08	231178	5561.04	231944	3362.88	12644.5	4722.99	225617	41.571	1.61879	0.0240552	-5.37751
71	791	tr|L7MIR1|L7MIR1_9ACAR	N/A	N/A	Putative bitil peptide (Fragment) OS	Rhipicephalus pulchellus PE	TRUE	-33.323	4.8607e-08	4489.79	48784.8	4179.94	49237.5	652.343	2577.25	-44295	0.0920326	-1.03606	10.8657	3.44171
72	749	tr|L7M6Q8|L7M6Q8_9ACAR	N/A	N/A	Peptidyl-prolyl cis-trans isomerase OS	Rhipicephalus pulchellus PE	TRUE	33.0914	5.0673e-08	194855	40180.7	195919	40325.4	8463.09	3970.66	154674	4.84946	0.685693	0.206209	-2.27782
73	735	tr|J9P0I1|J9P0I1_CANLF	N/A	N/A	Keratin, type I cytoskeletal 9 OS	Canis lupus familiaris GN	TRUE	-33.0345	5.1197e-08	519909	1.10801e+06	521538	1.11506e+06	11419.9	33724.1	-588100	0.469228	-0.328616	2.13116	1.09164
74	27	tr|A0A224YT49|A0A224YT49_9ACAR	N/A	N/A	Aldehyde dehydrogenase OS	Rhipicephalus zambeziensis PE	TRUE	32.8095	5.333e-08	641548	257119	646528	253102	19985.7	12236.2	384429	2.49514	0.397095	0.400779	-1.31912
75	9	tr|A0A224YUL1|A0A224YUL1_9ACAR	N/A	N/A	Lipoprotein amino terminal region OS	Rhipicephalus zambeziensis PE	TRUE	32.5738	5.5675e-08	4.02273e+06	2.09566e+06	4.00302e+06	2.09773e+06	100082	63112.7	1.92707e+06	1.91955	0.2832	0.520954	-0.940772
76	258	tr|L7M046|L7M046_9ACAR	N/A	N/A	Putative cuticular protein OS	Rhipicephalus pulchellus PE	TRUE	32.2819	5.875e-08	1.43091e+06	817796	1.42981e+06	806576	10810.3	36414.5	613116	1.74972	0.242968	0.57152	-0.807123
77	182	tr|C9W1E7|C9W1E7_RHISA	N/A	N/A	Cement-like antigen OS	Rhipicephalus sanguineus PE	TRUE	-31.9731	6.2219e-08	55176.1	5.68749e+06	55208.7	5.5281e+06	12697.6	352087	-5.63232e+06	0.0097013	-2.01317	103.079	6.68761
78	643	tr|A0A131Z306|A0A131Z306_RHIAP	N/A	N/A	Antigen 5 family member OS	Rhipicephalus appendiculatus PE	TRUE	31.7708	6.4622e-08	395218	156175	401877	158590	13963.7	5608.74	239043	2.53061	0.403226	0.395161	-1.33949
79	105	tr|A0A131XAX9|A0A131XAX9_9ACAR	N/A	N/A	Putative nadh-ubiquinone oxidoreductase ndufs1/75 kDa subunit OS	Hyalomma excavatum PE	TRUE	-31.7549	6.4816e-08	351636	641769	351911	646921	2461.31	18106.8	-290133	0.547917	-0.261285	1.82509	0.867971
80	177	tr|L7M679|L7M679_9ACAR	N/A	N/A	Putative f0f1-type atp synthase gamma subunit OS	Rhipicephalus pulchellus PE	TRUE	-31.3023	7.0613e-08	6437.3	84269.8	7789.3	84396.2	3605.85	3424.63	-77832.5	0.0763891	-1.11697	13.0909	3.71049
81	417	tr|C9W1E6|C9W1E6_RHISA	N/A	N/A	Putative cement protein OS	Rhipicephalus sanguineus PE	TRUE	-31.0033	7.4775e-08	140229	907814	141156	898028	2881.75	49432.4	-767585	0.154469	-0.811159	6.4738	2.69461
82	367	tr|A0A224YW31|A0A224YW31_9ACAR	N/A	N/A	Erythrocyte membrane protein 1 (Fragment) OS	Rhipicephalus zambeziensis PE	TRUE	-30.8101	7.7618e-08	164915	325082	164505	326369	5414.48	8875.92	-160167	0.507303	-0.294732	1.97121	0.97908
83	827	tr|A0A224YR96|A0A224YR96_9ACAR	N/A	N/A	Tick serine protease OS	Rhipicephalus zambeziensis PE	TRUE	30.7507	7.8517e-08	113836	8807.59	115214	8553.88	6150.97	2971.14	105029	12.9248	1.11142	0.0773708	-3.69207
84	435	tr|L7M5B2|L7M5B2_9ACAR	N/A	N/A	Putative nucleoside diphosphate-sugar hydrolase of the mutt nudix family OS	Rhipicephalus pulchellus PE	TRUE	30.4591	8.3109e-08	126716	37007	127671	37222.5	4048.5	4278.7	89709.2	3.42412	0.534549	0.292046	-1.77573
85	562	tr|A0A224YUF9|A0A224YUF9_9ACAR	N/A	N/A	NADH dehydrogenase [ubiquinone] 1 alpha subcomplex subunit 8 OS	Rhipicephalus zambeziensis PE	TRUE	-30.4358	8.349e-08	36854	162371	36558.1	162487	4385.05	6985.78	-125517	0.226974	-0.644025	4.4058	2.1394
86	79	tr|L7M6S1|L7M6S1_9ACAR	N/A	N/A	Putative heat shock-related protein OS	Rhipicephalus pulchellus PE	TRUE	-30.4341	8.3518e-08	472898	777493	471737	774427	4972.8	19389.2	-304595	0.608234	-0.215929	1.6441	0.717301
87	495	tr|A0A131XLJ3|A0A131XLJ3_9ACAR	N/A	N/A	Putative transglutaminase/protease-like protein OS	Hyalomma excavatum PE	TRUE	-30.4164	8.3808e-08	6481.65	222078	1550.04	224427	10284.3	9757.06	-215596	0.0291864	-1.53482	34.2625	5.09856
88	542	tr|G3MN41|G3MN41_9ACAR	N/A	N/A	Uncharacterized protein OS	Amblyomma maculatum PE	TRUE	-30.067	8.9789e-08	198797	347202	199048	346404	4105.88	8977.24	-148405	0.572568	-0.242173	1.74652	0.804481
89	889	tr|A0A023FNM2|A0A023FNM2_9ACAR	N/A	N/A	Putative alpha-2-macroglobulin-like protein OS	Amblyomma cajennense PE	TRUE	29.1182	1.0871e-07	130100	55464.6	129252	54927.9	4246.31	2872	74635	2.34563	0.37026	0.426324	-1.22998
90	379	tr|L7M6Q1|L7M6Q1_9ACAR	N/A	N/A	Putative bisphosphate 3'-nucleotidase bpnt1/inositol polyphosphate 1-phosphatase OS	Rhipicephalus pulchellus PE	TRUE	28.7447	1.1741e-07	113029	37680.4	113632	36705.3	2315.52	4703.52	75348.3	2.99967	0.477073	0.33337	-1.5848
91	55	tr|A0A224Z9I0|A0A224Z9I0_9ACAR	N/A	N/A	Succinate dehydrogenase [ubiquinone] flavoprotein subunit, mitochondrial OS	Rhipicephalus zambeziensis PE	TRUE	-28.7385	1.1756e-07	449937	952013	453033	944473	19270.2	29146.7	-502076	0.472617	-0.325491	2.11588	1.08126
92	758	tr|C9W1N5|C9W1N5_RHISA	N/A	N/A	Secreted protein OS	Rhipicephalus sanguineus PE	TRUE	-28.5126	1.2322e-07	13629.3	239632	14427.3	235133	5365.39	14917.3	-226003	0.0568758	-1.24507	17.5822	4.13604
93	53	tr|A0A224YEQ4|A0A224YEQ4_9ACAR	N/A	N/A	Glycine rich superfamily member (Fragment) OS	Rhipicephalus zambeziensis PE	TRUE	-27.9909	1.3756e-07	1.13341e+07	1.86179e+07	1.13947e+07	1.86203e+07	264787	448050	-7.28384e+06	0.608772	-0.215545	1.64265	0.716025
94	96	tr|A0A224YTY7|A0A224YTY7_9ACAR	N/A	N/A	Glyceraldehyde-3-phosphate dehydrogenase OS	Rhipicephalus zambeziensis PE	TRUE	27.9296	1.3937e-07	1.80438e+06	1.05495e+06	1.80325e+06	1.05438e+06	39054.3	36806.9	749427	1.71039	0.233095	0.584662	-0.774325
95	34	tr|F1PYU9|F1PYU9_CANLF	N/A	N/A	Keratin, type I cytoskeletal 10 OS	Canis lupus familiaris GN	TRUE	-27.7718	1.4416e-07	1.59412e+06	3.51931e+06	1.59054e+06	3.53195e+06	75398.7	116349	-1.92519e+06	0.452964	-0.343936	2.20768	1.14253
96	512	tr|A0A224YDI8|A0A224YDI8_9ACAR	N/A	N/A	Glycine rich superfamily member OS	Rhipicephalus zambeziensis PE	TRUE	27.7702	1.4421e-07	140546	37889.4	140189	38915.2	6645.75	3239.55	102657	3.70937	0.5693	0.269588	-1.89117
97	530	tr|L7LZK9|L7LZK9_9ACAR	N/A	N/A	Putative translocon-associated complex trap delta subunit OS	Rhipicephalus pulchellus PE	TRUE	-27.4892	1.5322e-07	83632.3	145275	83138.2	145208	1657.85	4167.2	-61642.7	0.575683	-0.239817	1.73707	0.796654
98	84	tr|L7MBN6|L7MBN6_9ACAR	N/A	N/A	Putative 24 kDa family member OS	Rhipicephalus pulchellus PE	TRUE	-27.4099	1.5588e-07	278399	594459	280094	599775	5675.74	22352.4	-316060	0.468324	-0.329454	2.13528	1.09442
99	413	tr|A0A131Z0J8|A0A131Z0J8_RHIAP	N/A	N/A	Pancreatic trypsin inhibitor OS	Rhipicephalus appendiculatus PE	TRUE	-27.168	1.6433e-07	47686.2	150250	48605.9	149773	2284.3	7196.52	-102564	0.317378	-0.498423	3.15081	1.65572
100	122	tr|Q2V829|Q2V829_9ACAR	N/A	N/A	Troponin I protein OS	Rhipicephalus haemaphysaloides haemaphysaloides PE	TRUE	26.8125	1.7775e-07	1.83286e+06	1.03574e+06	1.81158e+06	1.04594e+06	50802.2	30894.9	797120	1.76961	0.247878	0.565095	-0.823434
101	259	tr|Q19V51|Q19V51_DERVA	N/A	N/A	Hemelipoglycoprotein OS	Dermacentor variabilis PE	TRUE	26.7667	1.7957e-07	2.63744e+06	746178	2.64043e+06	802825	42966.6	134624	1.89126e+06	3.53459	0.54834	0.282918	-1.82154
102	2	tr|A0A224YT82|A0A224YT82_9ACAR	N/A	N/A	Filamin OS	Rhipicephalus zambeziensis PE	TRUE	26.7378	1.8073e-07	2.13932e+06	1.57376e+06	2.1387e+06	1.56378e+06	25314.6	33894.5	565564	1.35937	0.133338	0.735634	-0.44294
103	733	tr|A0A131YPX6|A0A131YPX6_RHIAP	N/A	N/A	Metastriate one of each protein family OS	Rhipicephalus appendiculatus PE	TRUE	26.4984	1.9067e-07	1.29634e+06	761824	1.30252e+06	758703	32912.5	23330.6	534512	1.70162	0.230863	0.587675	-0.76691
104	481	tr|A0A023GL48|A0A023GL48_9ACAR	N/A	N/A	Putative aldehyde dehydrogenase OS	Amblyomma triste PE	TRUE	26.46	1.9233e-07	353302	140570	348823	141285	12036.1	10662.3	212732	2.51336	0.400254	0.397874	-1.32962
105	760	tr|A0A034WX82|A0A034WX82_RHIMP	N/A	N/A	Chitinase_1 OS	Rhipicephalus microplus PE	TRUE	26.4564	1.9248e-07	214462	85846.3	212211	88325.4	7295.71	6427.02	128616	2.49821	0.397629	0.400286	-1.3209
106	883	tr|B7S729|B7S729_RHISA	N/A	N/A	FREP A1 (Fragment) OS	Rhipicephalus sanguineus PE	TRUE	26.4082	1.9458e-07	20331.9	3550.35	20425.6	3969.42	718.076	1048.64	16781.5	5.72672	0.757906	0.17462	-2.51771
107	23	tr|A0A131YYS9|A0A131YYS9_RHIAP	N/A	N/A	Serpin B OS	Rhipicephalus appendiculatus PE	TRUE	26.2659	2.0094e-07	312693	96555.6	316940	96575.9	13962	8712.97	216137	3.23848	0.510341	0.308787	-1.69532
108	245	tr|A0A131Z2K3|A0A131Z2K3_RHIAP	N/A	N/A	Uncharacterized protein OS	Rhipicephalus appendiculatus PE	TRUE	25.9931	2.1383e-07	481777	253849	482042	253694	6413.03	16323	227928	1.89789	0.278271	0.526901	-0.924397
109	314	tr|A0A131YIS0|A0A131YIS0_RHIAP	N/A	N/A	Chitin-binding protein OS	Rhipicephalus appendiculatus PE	TRUE	25.7174	2.2785e-07	1.22214e+06	755461	1.22762e+06	757205	27213.4	24012.1	466676	1.61774	0.208908	0.618147	-0.693977
110	80	tr|A0A131YFY5|A0A131YFY5_RHIAP	N/A	N/A	Glutathione S-transferase OS	Rhipicephalus appendiculatus PE	TRUE	25.7041	2.2855e-07	1.04866e+06	458641	1.05506e+06	459850	30711.5	34123.3	590020	2.28645	0.359162	0.437358	-1.19311
111	580	tr|E2RFV2|E2RFV2_CANLF	N/A	N/A	Tubulin beta chain OS	Canis lupus familiaris GN	TRUE	-25.6941	2.2908e-07	108108	247028	108252	248043	1920.93	10641.4	-138920	0.437634	-0.358889	2.28502	1.1922
112	784	tr|A0A224YCX8|A0A224YCX8_9ACAR	N/A	N/A	Pancreatic trypsin inhibitor OS	Rhipicephalus zambeziensis PE	TRUE	25.645	2.317e-07	105902	11267.7	106729	12241	4970.56	5455.5	94634.1	9.39871	0.973068	0.106398	-3.23246
113	498	tr|C9W1K5|C9W1K5_RHISA	N/A	N/A	Putative cement protein (Fragment) OS	Rhipicephalus sanguineus PE	TRUE	-25.5896	2.3471e-07	2187.31	1.12463e+06	1707.29	1.0946e+06	1294.73	87716.9	-1.12244e+06	0.00194492	-2.7111	514.16	9.00607
114	18	tr|G3MKF8|G3MKF8_9ACAR	N/A	N/A	Tubulin beta chain OS	Amblyomma maculatum PE	TRUE	-25.3186	2.5006e-07	20373.5	203960	20099.3	202188	1986.23	14365.4	-183587	0.0998895	-1.00048	10.0111	3.32352
115	599	tr|A0A131YHK9|A0A131YHK9_RHIAP	N/A	N/A	Glutathione S-transferase OS	Rhipicephalus appendiculatus PE	TRUE	25.2004	2.5712e-07	83191.2	20755.5	82511.7	21567.2	3717.95	3275.71	62435.8	4.00816	0.602945	0.249491	-2.00294
116	544	tr|A0A131Z3P7|A0A131Z3P7_RHIAP	N/A	N/A	Biliverdin reductase / flavin reductase OS	Rhipicephalus appendiculatus PE	TRUE	25.1821	2.5824e-07	114398	23850.8	113801	24135.4	6150.1	3727.2	90546.8	4.79639	0.680915	0.20849	-2.26195
117	470	tr|G3MNV3|G3MNV3_9ACAR	N/A	N/A	Uncharacterized protein OS	Amblyomma maculatum PE	TRUE	-25.0654	2.6547e-07	95632.3	286578	93410.7	284531	6189.6	13921.9	-190946	0.333704	-0.476638	2.99667	1.58336
118	61	tr|A0A224YUR7|A0A224YUR7_9ACAR	N/A	N/A	Lysosomal acid phosphatase OS	Rhipicephalus zambeziensis PE	TRUE	25.0128	2.6881e-07	242541	78856.9	242033	75395.8	9432.9	9072.87	163684	3.07571	0.487946	0.325128	-1.62092
119	299	tr|A0A224Z0W8|A0A224Z0W8_9ACAR	N/A	N/A	Large subunit ribosomal protein L8e OS	Rhipicephalus zambeziensis PE	TRUE	-24.9726	2.7139e-07	259781	417467	260870	420460	9173.8	8679.12	-157687	0.622278	-0.206016	1.607	0.68437
120	120	tr|A0A131YVE7|A0A131YVE7_RHIAP	N/A	N/A	Calponin OS	Rhipicephalus appendiculatus PE	TRUE	24.8582	2.7891e-07	1.93996e+06	765150	1.91371e+06	759320	88986.7	31868	1.17481e+06	2.5354	0.404046	0.394415	-1.34221
121	845	tr|A0A224YZK5|A0A224YZK5_9ACAR	N/A	N/A	Glutathione s-transferase OS	Rhipicephalus zambeziensis PE	TRUE	24.8094	2.822e-07	45644.8	10502.6	45203.1	10596.1	2451.91	1419.12	35142.2	4.34604	0.638094	0.230094	-2.1197
122	410	tr|A0A224ZAU6|A0A224ZAU6_9ACAR	N/A	N/A	Triosephosphate isomerase OS	Rhipicephalus zambeziensis PE	TRUE	24.6862	2.9068e-07	209730	88115.5	210082	87434.9	3890.8	9052.05	121614	2.38017	0.376607	0.420139	-1.25106
123	437	tr|L7M7B2|L7M7B2_9ACAR	N/A	N/A	Putative metalloexopeptidase OS	Rhipicephalus pulchellus PE	TRUE	24.5953	2.9713e-07	94984.8	42569.2	94213.2	42165.5	3482.66	2457.21	52415.6	2.23131	0.348559	0.448168	-1.15789
124	487	tr|A0A131Z4A2|A0A131Z4A2_RHIAP	N/A	N/A	Cystatin OS	Rhipicephalus appendiculatus PE	TRUE	24.5819	2.9809e-07	98101.6	3799.96	99391.6	3681.97	7358.61	2171.98	94301.7	25.8165	1.4119	0.0387349	-4.69022
125	124	tr|Q4PM69|Q4PM69_IXOSC	N/A	N/A	Histone H4 OS	Ixodes scapularis GN	TRUE	-24.5142	3.0302e-07	2.65004e+07	4.11272e+07	2.63451e+07	4.13383e+07	602672	1.02997e+06	-1.46269e+07	0.644351	-0.190877	1.55195	0.634081
126	857	tr|A0A023GBH4|A0A023GBH4_9ACAR	N/A	N/A	Putative secreted protein OS	Amblyomma triste PE	TRUE	24.3674	3.1404e-07	89345.4	9307.16	88665.6	8993.09	2639.09	6015.86	80038.2	9.59964	0.982255	0.104171	-3.26298
127	154	tr|A0A224YYF6|A0A224YYF6_9ACAR	N/A	N/A	Guanine nucleotide-binding protein OS	Rhipicephalus zambeziensis PE	TRUE	-24.31	3.1847e-07	25587.9	75954.8	26543.4	75858.1	3569.89	2103.86	-50366.9	0.336883	-0.47252	2.96839	1.56968
128	230	tr|A0A224YR29|A0A224YR29_9ACAR	N/A	N/A	Cytochrome c oxidase subunit 5a OS	Rhipicephalus zambeziensis PE	TRUE	-24.1808	3.2873e-07	644852	916939	646224	920439	16595.2	15200.2	-272087	0.703266	-0.15288	1.42194	0.507857
129	511	tr|A0A224YHR8|A0A224YHR8_9ACAR	N/A	N/A	TIL domain containing protein OS	Rhipicephalus zambeziensis PE	TRUE	-24.1585	3.3054e-07	14213.4	48755.7	14314.8	48674.1	1406.29	2489.96	-34542.3	0.291524	-0.535326	3.43025	1.77832
130	117	tr|A0A034WWK3|A0A034WWK3_RHIMP	N/A	N/A	Peptidyl-prolyl cis-trans isomerase OS	Rhipicephalus microplus PE	TRUE	23.8019	3.6109e-07	47719	8226.03	47857	8200.5	3199.76	879.666	39493	5.80097	0.763501	0.172385	-2.5363
131	104	tr|A0A131YDT0|A0A131YDT0_RHIAP	N/A	N/A	Cofilin OS	Rhipicephalus appendiculatus PE	TRUE	23.4662	3.9291e-07	1.84533e+06	1.25309e+06	1.84528e+06	1.24905e+06	43087.7	26291.8	592238	1.47262	0.168091	0.679061	-0.558386
132	8	tr|A0A131YWH0|A0A131YWH0_RHIAP	N/A	N/A	Tick thioester protein OS	Rhipicephalus appendiculatus PE	TRUE	23.4539	3.9413e-07	170255	59333.2	173836	59213.3	8838.63	3368.27	110922	2.86947	0.457801	0.348497	-1.52078
133	418	tr|L7MKC0|L7MKC0_9ACAR	N/A	N/A	Putative alternative splicing factor srp20/9g8 rrm superfamily (Fragment) OS	Rhipicephalus pulchellus PE	TRUE	23.4463	3.949e-07	519633	313099	522645	311236	16243.2	6822.01	206534	1.65965	0.220016	0.602538	-0.730876
134	558	tr|M1H857|M1H857_RHIAP	N/A	N/A	Ferritin OS	Rhipicephalus appendiculatus GN	TRUE	23.4396	3.9557e-07	189257	81397.3	190762	78835.3	6492.84	6522.41	107860	2.3251	0.366442	0.430089	-1.21729
135	428	tr|L7LPR5|L7LPR5_9ACAR	N/A	N/A	Putative tick salivary cystatin OS	Rhipicephalus pulchellus PE	TRUE	-23.3451	4.0518e-07	39513.6	180807	39276.9	182569	3290.2	11649	-141293	0.218541	-0.660467	4.5758	2.19403
136	212	tr|A0A131Z0F3|A0A131Z0F3_RHIAP	N/A	N/A	Uncharacterized protein OS	Rhipicephalus appendiculatus PE	TRUE	-23.1946	4.2105e-07	1.61875e+06	2.20699e+06	1.61499e+06	2.20393e+06	38363.5	33180.8	-588239	0.733465	-0.13462	1.36339	0.447199
137	501	tr|L7MGW5|L7MGW5_9ACAR	N/A	N/A	Uncharacterized protein (Fragment) OS	Rhipicephalus pulchellus PE	TRUE	-23.133	4.2776e-07	524953	934604	516131	933355	19509.3	29559.3	-409651	0.561685	-0.250507	1.78036	0.832167
138	83	tr|A0A131YF72|A0A131YF72_RHIAP	N/A	N/A	Glycine rich superfamily member OS	Rhipicephalus appendiculatus PE	TRUE	-23.1088	4.3043e-07	8.95258e+06	1.66779e+07	8.88341e+06	1.65352e+07	340718	575275	-7.72529e+06	0.536794	-0.270193	1.86291	0.89756
139	113	tr|F1PIX8|F1PIX8_CANLF	N/A	N/A	Complement C3 OS	Canis lupus familiaris GN	TRUE	23.0868	4.3287e-07	185563	16342.8	184713	15834.2	13083.6	6612.16	169220	11.3545	1.05517	0.0880712	-3.50519
140	253	tr|A0A1E1XNF6|A0A1E1XNF6_9ACAR	N/A	N/A	Putative quinolinate phosphoribosyl transferase (Fragment) OS	Amblyomma sculptum PE	TRUE	22.9437	4.4916e-07	172893	96178.1	171764	96245.5	6484.04	1635.78	76714.6	1.79763	0.254701	0.556288	-0.846097
141	473	tr|L7M621|L7M621_9ACAR	N/A	N/A	Putative translocon-associated protein OS	Rhipicephalus pulchellus PE	TRUE	-22.7023	4.7829e-07	134694	218369	134893	216747	851.547	7322.18	-83675.3	0.616817	-0.209844	1.62123	0.697086
142	384	tr|C9W1I2|C9W1I2_RHISA	N/A	N/A	Putative beta thymosin OS	Rhipicephalus sanguineus PE	TRUE	22.6948	4.7922e-07	166509	33544.1	168566	34485.2	8110.57	8457.04	132965	4.96388	0.695821	0.201455	-2.31147
143	220	tr|A0A131Z4L0|A0A131Z4L0_RHIAP	N/A	N/A	Glutathione S-transferase OS	Rhipicephalus appendiculatus PE	TRUE	22.67	4.8234e-07	226821	90801	228111	89683.4	6193.34	10278.2	136020	2.498	0.397592	0.40032	-1.32077
144	70	tr|L7MAK0|L7MAK0_9ACAR	N/A	N/A	Putative acetyl-coa hydrolase OS	Rhipicephalus pulchellus PE	TRUE	-22.4486	5.1129e-07	522844	992834	518012	988085	22539.5	35288.4	-469990	0.526618	-0.278504	1.89891	0.925171
145	179	tr|A0A224Z3Y0|A0A224Z3Y0_9ACAR	N/A	N/A	RNA-binding protein Musashi OS	Rhipicephalus zambeziensis PE	TRUE	-22.4394	5.1254e-07	343280	715956	341359	713387	4837.51	32862.1	-372676	0.47947	-0.319238	2.08563	1.06049
146	634	tr|F1PNY2|F1PNY2_CANLF	N/A	N/A	Uncharacterized protein OS	Canis lupus familiaris PE	TRUE	22.2039	5.4567e-07	94214.1	16176.9	93308.2	15094.9	2725.45	6479.24	78037.2	5.82398	0.76522	0.171704	-2.54201
147	831	tr|A0A147BP26|A0A147BP26_IXORI	N/A	N/A	Putative secreted protein OS	Ixodes ricinus PE	TRUE	-22.1463	5.5415e-07	261438	444523	262056	439745	4611.03	15878.1	-183085	0.588132	-0.230525	1.7003	0.765787
148	292	tr|E2QUV3|E2QUV3_CANLF	N/A	N/A	Alpha 2-HS glycoprotein OS	Canis lupus familiaris GN	TRUE	22.0647	5.6643e-07	107347	13917.2	107214	14875.3	7168.25	4509.49	93430.1	7.7133	0.88724	0.129646	-2.94735
149	403	tr|L7M3F0|L7M3F0_9ACAR	N/A	N/A	Uncharacterized protein OS	Rhipicephalus pulchellus PE	TRUE	-22.051	5.6853e-07	224986	351701	225578	352687	6373.28	9563.89	-126715	0.639708	-0.194018	1.56321	0.644514
150	235	tr|L7MDB3|L7MDB3_9ACAR	N/A	N/A	Malate dehydrogenase (Fragment) OS	Rhipicephalus pulchellus PE	TRUE	21.9391	5.8596e-07	306473	190352	307545	189202	6280.12	8521.66	116121	1.61003	0.206835	0.621105	-0.68709
151	448	tr|L7LS09|L7LS09_9ACAR	N/A	N/A	Putative bitil peptide OS	Rhipicephalus pulchellus PE	TRUE	-21.8498	6.0031e-07	16842.8	55961.6	16702.5	54984.1	1096.63	3408.63	-39118.7	0.300971	-0.521475	3.32257	1.7323
152	151	tr|C9W1T4|C9W1T4_RHISA	N/A	N/A	Putative cement protein (Fragment) OS	Rhipicephalus sanguineus PE	TRUE	-21.8286	6.0378e-07	3.22173e+06	5.08239e+06	3.21944e+06	5.10879e+06	18147.5	169510	-1.86066e+06	0.633901	-0.197978	1.57753	0.65767
153	178	tr|A0A224YV39|A0A224YV39_9ACAR	N/A	N/A	Nucleoside diphosphate kinase OS	Rhipicephalus zambeziensis PE	TRUE	21.7433	6.1797e-07	1.29022e+06	937938	1.29647e+06	933712	13616.1	29404.4	352285	1.3756	0.138491	0.726958	-0.460056
154	517	tr|B7PKP2|B7PKP2_IXOSC	N/A	N/A	Uncharacterized protein OS	Ixodes scapularis GN	TRUE	21.6966	6.2591e-07	147353	81650.9	146704	81637.7	3077.18	5216.5	65702.4	1.80467	0.256399	0.554116	-0.851739
155	142	tr|G3MM77|G3MM77_9ACAR	N/A	N/A	Uncharacterized protein OS	Amblyomma maculatum PE	TRUE	21.568	6.4839e-07	435659	243426	432976	246232	8713.01	15551.2	192233	1.7897	0.252779	0.558754	-0.839715
156	648	tr|A0A224YFQ9|A0A224YFQ9_9ACAR	N/A	N/A	Tissue factor pathway inhibitor OS	Rhipicephalus zambeziensis PE	TRUE	-21.5285	6.5547e-07	10065.8	38340.8	10223.4	37902.9	1447.19	2192.13	-28274.9	0.262536	-0.580811	3.809	1.92941
157	534	tr|A0A131YI86|A0A131YI86_RHIAP	N/A	N/A	Cystatin-A/B OS	Rhipicephalus appendiculatus PE	TRUE	21.2843	7.0137e-07	62031	6842.04	62504.6	8417.88	3847.83	3476.72	55189	9.06615	0.957423	0.1103	-3.18049
158	328	tr|A0A224Z2T0|A0A224Z2T0_9ACAR	N/A	N/A	Purine nucleoside phosphorylase OS	Rhipicephalus zambeziensis PE	TRUE	21.0892	7.4074e-07	208016	76687.5	206849	74777.4	6334.31	10723.5	131329	2.71252	0.433373	0.368661	-1.43963
159	46	tr|A0A131YMB0|A0A131YMB0_RHIAP	N/A	N/A	PDZ and LIM domain protein Zasp OS	Rhipicephalus appendiculatus PE	TRUE	21.085	7.4161e-07	504295	240893	504975	238529	16582.6	18688.4	263403	2.09344	0.320861	0.477682	-1.06588
160	645	tr|G3MN31|G3MN31_9ACAR	N/A	N/A	Uncharacterized protein OS	Amblyomma maculatum PE	TRUE	20.9623	7.6773e-07	147923	68158.1	146476	67384.5	5175.04	5580.01	79765.2	2.1703	0.336519	0.460766	-1.11789
161	310	tr|G3MKS0|G3MKS0_9ACAR	N/A	N/A	Uncharacterized protein OS	Amblyomma maculatum PE	TRUE	20.9482	7.708e-07	223814	99656.7	222485	98871.5	10312	5845.93	124157	2.24585	0.35138	0.445266	-1.16726
162	48	tr|A0A131YYR4|A0A131YYR4_RHIAP	N/A	N/A	Heat shock 70kDa protein 1/8 OS	Rhipicephalus appendiculatus PE	TRUE	20.7226	8.2189e-07	609249	217195	598251	207224	29099.4	24186	392054	2.80508	0.447946	0.356496	-1.48804
163	112	tr|A0A224YYB6|A0A224YYB6_9ACAR	N/A	N/A	Enolase OS	Rhipicephalus zambeziensis PE	TRUE	20.596	8.523e-07	500457	283955	496640	287473	9056.93	18972.8	216502	1.76245	0.246117	0.567392	-0.817583
164	904	tr|Q6JVM9|Q6JVM9_RHIAP	N/A	N/A	Glutathione S-transferase OS	Rhipicephalus appendiculatus GN	TRUE	20.5599	8.612e-07	465389	90395.7	464266	91174.4	36327	3316.64	374993	5.14836	0.711669	0.194237	-2.36411
165	155	tr|L7M7Z9|L7M7Z9_9ACAR	N/A	N/A	Putative cytochrome c1 OS	Rhipicephalus pulchellus PE	TRUE	-20.4873	8.7946e-07	101370	211048	100131	210179	3830.67	9998.25	-109678	0.480317	-0.318472	2.08196	1.05794
166	781	tr|L7MAQ2|L7MAQ2_9ACAR	N/A	N/A	Putative glycine rich protein (Fragment) OS	Rhipicephalus pulchellus PE	TRUE	20.4788	8.8162e-07	22184.8	11445.4	22154.8	11569.5	571.332	879.554	10739.3	1.93831	0.287423	0.515913	-0.9548
167	239	tr|F1PZR4|F1PZR4_CANLF	N/A	N/A	Hemopexin OS	Canis lupus familiaris GN	TRUE	20.4561	8.8743e-07	166762	36718.7	166889	35923	5710.6	11359.7	130043	4.54159	0.657208	0.220187	-2.1832
168	747	tr|A0A131XBM8|A0A131XBM8_9ACAR	N/A	N/A	Rab GDP dissociation inhibitor OS	Hyalomma excavatum PE	TRUE	20.4399	8.9159e-07	96806.3	54751.3	97045.9	55163.9	2338.24	3386.11	42055	1.76811	0.247509	0.565576	-0.822208
169	520	tr|L7M096|L7M096_9ACAR	N/A	N/A	Putative toll-like receptor 5 OS	Rhipicephalus pulchellus PE	TRUE	19.9761	1.0215e-06	211120	74405.8	208877	71611.4	7924.47	11160.5	136714	2.83741	0.452922	0.352434	-1.50458
170	249	tr|L7M1F0|L7M1F0_9ACAR	N/A	N/A	Putative camp-dependent protein kinase r2 OS	Rhipicephalus pulchellus PE	TRUE	-19.8722	1.0535e-06	220113	289638	222179	290007	5015.83	4878.81	-69525.4	0.759958	-0.119211	1.31586	0.396009
171	231	tr|A0A131YT26|A0A131YT26_RHIAP	N/A	N/A	Cytochrome b-c1 complex subunit Rieske, mitochondrial OS	Rhipicephalus appendiculatus PE	TRUE	-19.7515	1.0922e-06	342454	518556	341224	520389	13393.5	11772.2	-176102	0.6604	-0.180193	1.51423	0.598589
172	848	tr|A0A224YGY1|A0A224YGY1_9ACAR	N/A	N/A	Serum amyloid A protein OS	Rhipicephalus zambeziensis PE	TRUE	-19.4341	1.2021e-06	3830.72	28328.4	4121.13	27986	1253.67	2187.29	-24497.7	0.135225	-0.868941	7.39506	2.88656
173	52	tr|C9W1U0|C9W1U0_RHISA	N/A	N/A	Putative cement protein (Fragment) OS	Rhipicephalus sanguineus PE	TRUE	-19.4115	1.2104e-06	4.25159e+07	1.0478e+08	4.25344e+07	1.04582e+08	888806	6.35333e+06	-6.22644e+07	0.405762	-0.391728	2.4645	1.30129
174	186	tr|A0A224Z184|A0A224Z184_9ACAR	N/A	N/A	Uncharacterized protein OS	Rhipicephalus zambeziensis PE	TRUE	19.0263	1.3628e-06	1.29716e+06	833340	1.30532e+06	833603	21935.1	43542.3	463816	1.55658	0.19217	0.642436	-0.638375
175	26	tr|A0A131ZDX3|A0A131ZDX3_RHIAP	N/A	N/A	TIL domain containing protein (Fragment) OS	Rhipicephalus appendiculatus PE	TRUE	18.9662	1.3885e-06	892050	660506	893229	662190	14756.7	19452.6	231544	1.35056	0.130512	0.740436	-0.433553
176	91	tr|A0A131YJK6|A0A131YJK6_RHIAP	N/A	N/A	Acetyl-CoA acyltransferase 2 OS	Rhipicephalus appendiculatus PE	TRUE	-18.8078	1.4591e-06	288038	496338	288395	497208	5605.54	21429.4	-208300	0.580326	-0.236328	1.72317	0.785066
177	788	tr|Q9XYR3|Q9XYR3_RHIMP	N/A	N/A	Carboxylesterase-related protein (Fragment) OS	Rhipicephalus microplus PE	TRUE	18.6928	1.513e-06	227820	66543.2	228620	65100.8	14808.8	8857.34	161277	3.42364	0.534489	0.292086	-1.77553
178	436	tr|A0A1E1XH73|A0A1E1XH73_9ACAR	N/A	N/A	Putative cysteine s-methyltransferase (Fragment) OS	Amblyomma aureolatum PE	TRUE	-18.6844	1.517e-06	114008	160926	114083	159801	1748.59	4707.89	-46917.7	0.708452	-0.14969	1.41153	0.497258
179	54	tr|A0A224Z4I9|A0A224Z4I9_9ACAR	N/A	N/A	Mitochondrial-processing peptidase subunit beta OS	Rhipicephalus zambeziensis PE	TRUE	-18.6399	1.5386e-06	184939	395891	186686	402951	11464.7	19516	-210952	0.467147	-0.330547	2.14065	1.09805
180	33	tr|A0A131XJV6|A0A131XJV6_9ACAR	N/A	N/A	Putative glutamate/leucine/phenylalanine/valine dehydrogenase OS	Hyalomma excavatum PE	TRUE	-18.4354	1.6422e-06	1.52757e+06	2.25277e+06	1.53416e+06	2.24176e+06	21482.7	75685.2	-725202	0.678085	-0.168716	1.47474	0.560462
181	95	tr|L7MG42|L7MG42_9ACAR	N/A	N/A	Putative alkyl hydroperoxide reductase thiol specific antioxidant (Fragment) OS	Rhipicephalus pulchellus PE	TRUE	18.366	1.6792e-06	1.13606e+06	587628	1.13741e+06	591088	24837.4	54312.9	548434	1.9333	0.2863	0.51725	-0.951067
182	38	tr|A0A224YXN0|A0A224YXN0_9ACAR	N/A	N/A	Elongation factor 1-alpha OS	Rhipicephalus zambeziensis PE	TRUE	18.1804	1.7831e-06	4.69851e+06	3.6558e+06	4.71586e+06	3.6418e+06	80399.8	81814.5	1.04271e+06	1.28522	0.108978	0.778076	-0.362017
183	137	tr|L7M7R7|L7M7R7_9ACAR	N/A	N/A	Putative atp synthase subunit b OS	Rhipicephalus pulchellus PE	TRUE	-18.0799	1.8424e-06	367062	651312	367158	648816	18908.3	25123.4	-284250	0.563573	-0.24905	1.77439	0.827325
184	324	tr|E2R7W6|E2R7W6_CANLF	N/A	N/A	Uncharacterized protein OS	Canis lupus familiaris GN	TRUE	-18.0594	1.8548e-06	119367	286044	119814	291557	4643.85	17865.1	-166677	0.417304	-0.379548	2.39634	1.26083
185	293	tr|A0A131XDY8|A0A131XDY8_9ACAR	N/A	N/A	Putative small heat shock protein ii OS	Hyalomma excavatum PE	TRUE	17.9953	1.8941e-06	347479	240798	348820	242087	5364.9	10573.4	106681	1.44303	0.159277	0.692984	-0.529105
186	35	tr|A0A0C5PNS0|A0A0C5PNS0_RHISA	N/A	N/A	60S acidic ribosomal protein P0 (Fragment) OS	Rhipicephalus sanguineus PE	TRUE	17.9012	1.9537e-06	1.07545e+06	785040	1.08299e+06	778195	25455.1	20118.9	290410	1.36993	0.136698	0.729964	-0.454102
187	391	tr|A0A224YU86|A0A224YU86_9ACAR	N/A	N/A	Myosin heavy chain 6/7 OS	Rhipicephalus zambeziensis PE	TRUE	-17.8501	1.987e-06	53037.3	147491	50620.8	147781	8779.22	5909.7	-94453.4	0.359597	-0.444183	2.78089	1.47555
188	694	tr|A0A131YE25|A0A131YE25_RHIAP	N/A	N/A	Annexin OS	Rhipicephalus appendiculatus PE	TRUE	17.8246	2.0038e-06	176730	119988	176658	121368	4352.7	4646.4	56741.9	1.4729	0.168173	0.678933	-0.558658
189	17	tr|L7MAA0|L7MAA0_9ACAR	N/A	N/A	ATP synthase subunit alpha OS	Rhipicephalus pulchellus PE	TRUE	-17.7595	2.0475e-06	1.46477e+06	2.54919e+06	1.45779e+06	2.56781e+06	86773.7	85933	-1.08443e+06	0.574599	-0.240635	1.74034	0.799371
190	545	tr|L7MJR7|L7MJR7_9ACAR	N/A	N/A	Putative phosphoglycerate mutase (Fragment) OS	Rhipicephalus pulchellus PE	TRUE	17.7572	2.0491e-06	116726	59150.9	116955	59091.5	5132.64	3963.27	57575.2	1.97336	0.295206	0.50675	-0.980655
191	751	tr|A0A131XM47|A0A131XM47_9ACAR	N/A	N/A	NADH dehydrogenase [ubiquinone] flavoprotein 1, mitochondrial OS	Hyalomma excavatum PE	TRUE	-17.7269	2.0699e-06	17133.6	58114.1	17471.8	58444.8	4423.68	1344.67	-40980.4	0.294828	-0.530431	3.39181	1.76205
192	765	tr|L7M4W5|L7M4W5_9ACAR	N/A	N/A	60S ribosomal protein L13 OS	Rhipicephalus pulchellus PE	TRUE	-17.7018	2.0872e-06	245032	453119	239298	461350	13646.7	19144.3	-208088	0.540766	-0.266991	1.84923	0.886923
193	610	tr|F1PCG4|F1PCG4_CANLF	N/A	N/A	Peroxiredoxin 2 OS	Canis lupus familiaris GN	TRUE	17.686	2.0983e-06	49206.1	4186.03	49507	3347.48	4205.89	2868.68	45020	11.7548	1.07022	0.0850714	-3.55518
194	835	tr|A0A131XIE3|A0A131XIE3_9ACAR	N/A	N/A	Aspartate aminotransferase OS	Hyalomma excavatum PE	TRUE	17.2814	2.4052e-06	34801.3	4100.55	35668.4	3354.79	2428.18	2593.84	30700.7	8.48699	0.928754	0.117827	-3.08525
195	82	tr|A0A131XPK7|A0A131XPK7_9ACAR	N/A	N/A	Putative basement membrane-specific heparan sulfate proteoglycan core protein (Fragment) OS	Hyalomma excavatum PE	TRUE	-17.2369	2.442e-06	32391.5	236276	36189.3	233160	10209.2	21340.5	-203885	0.137092	-0.862989	7.2944	2.86679
196	351	tr|L7M574|L7M574_9ACAR	N/A	N/A	Putative 60s ribosomal protein l13a OS	Rhipicephalus pulchellus PE	TRUE	-17.2091	2.4654e-06	335665	451881	335139	452607	7414.32	11289.3	-116216	0.742818	-0.129118	1.34622	0.42892
197	651	tr|L7M2X3|L7M2X3_9ACAR	N/A	N/A	Putative mitochondrial electron transport nadh to ubiquinone OS	Rhipicephalus pulchellus PE	TRUE	-17.1171	2.5445e-06	66884.5	128595	67299.2	127738	5399.93	4778.09	-61710.2	0.520118	-0.283898	1.92264	0.943088
198	13	tr|F2Z4Q6|F2Z4Q6_CANLF	N/A	N/A	Serum albumin OS	Canis lupus familiaris GN	TRUE	17.0783	2.5788e-06	69120.3	22933.1	68701	23052.4	4986.98	2094.33	46187.3	3.01401	0.479144	0.331784	-1.59168
199	595	tr|A0A224Z9G4|A0A224Z9G4_9ACAR	N/A	N/A	Sulfotransferase OS	Rhipicephalus zambeziensis PE	TRUE	-17.0746	2.5821e-06	58433.4	115689	58348.7	115167	2202.4	6334.53	-57255.2	0.505092	-0.296629	1.97984	0.985381
200	803	tr|B7QJ07|B7QJ07_IXOSC	N/A	N/A	Uncharacterized protein OS	Ixodes scapularis GN	TRUE	-16.9945	2.6546e-06	19746.7	50261.8	19785.4	50087.5	1768.37	3125.59	-30515.1	0.392877	-0.405743	2.54533	1.34785
201	608	tr|G3MLX1|G3MLX1_9ACAR	N/A	N/A	Uncharacterized protein OS	Amblyomma maculatum PE	TRUE	-16.9009	2.7424e-06	66851.5	155913	67629.9	152479	3620.85	9897.66	-89061	0.428776	-0.36777	2.33222	1.2217
202	829	tr|C9W1A6|C9W1A6_RHISA	N/A	N/A	Putative cement protein (Fragment) OS	Rhipicephalus sanguineus PE	TRUE	-16.8708	2.7714e-06	4419.91	1.87583e+06	4981.66	1.85097e+06	2536.1	221837	-1.87141e+06	0.00235624	-2.62778	424.404	8.7293
203	726	tr|B7P573|B7P573_IXOSC	N/A	N/A	Processing peptidase beta subunit, putative OS	Ixodes scapularis GN	TRUE	-16.7969	2.844e-06	80324.6	144050	80852.1	144742	3588.09	6685.73	-63725.1	0.557617	-0.253664	1.79335	0.842653
204	901	tr|B7P858|B7P858_IXOSC	N/A	N/A	Low-density lipoprotein receptor, putative OS	Ixodes scapularis GN	TRUE	-16.7773	2.8637e-06	14412.6	28109.9	14375.5	28175.8	1214.63	1091.26	-13697.3	0.512723	-0.290117	1.95037	0.963749
205	73	tr|A0A224Z4Y6|A0A224Z4Y6_9ACAR	N/A	N/A	Protein disulfide-isomerase OS	Rhipicephalus zambeziensis PE	TRUE	16.7699	2.8711e-06	543851	389318	545693	389039	16091.2	8985.35	154534	1.39693	0.145176	0.715853	-0.482264
206	867	tr|A0A224YLA3|A0A224YLA3_9ACAR	N/A	N/A	Uncharacterized protein OS	Rhipicephalus zambeziensis PE	TRUE	-16.6479	2.9973e-06	127780	297987	127312	296459	5509.38	19691.7	-170207	0.42881	-0.367735	2.33204	1.22159
207	617	tr|L7M0L6|L7M0L6_9ACAR	N/A	N/A	Putative rna-binding protein elav/hu rrm superfamily OS	Rhipicephalus pulchellus PE	TRUE	16.5848	3.065e-06	125073	76419.6	124909	77172.6	4957.16	3138.57	48653.2	1.63666	0.213958	0.611001	-0.710754
208	525	tr|A0A131YQW8|A0A131YQW8_RHIAP	N/A	N/A	Lipocalin OS	Rhipicephalus appendiculatus PE	TRUE	-16.5198	3.1367e-06	24093.2	176059	17100.3	176194	17537.1	5561.89	-151966	0.136847	-0.863764	7.30742	2.86936
209	365	tr|A0A131YH63|A0A131YH63_RHIAP	N/A	N/A	Peptidoglycan recognition protein OS	Rhipicephalus appendiculatus PE	TRUE	-16.4113	3.2607e-06	16531.7	96146	17872.4	93465.8	6780.86	6939.42	-79614.3	0.171944	-0.764613	5.81584	2.53999
210	241	tr|V5HJX3|V5HJX3_IXORI	N/A	N/A	Histone H2A OS	Ixodes ricinus PE	TRUE	-16.3816	3.2957e-06	505690	1.10634e+06	504114	1.11119e+06	26676.3	68307.7	-600647	0.457085	-0.340003	2.18778	1.12947
211	39	tr|A0A224YPR9|A0A224YPR9_9ACAR	N/A	N/A	Catalase OS	Rhipicephalus zambeziensis PE	TRUE	16.3443	3.3402e-06	1.51922e+06	892519	1.52632e+06	871455	23427.2	73021	626699	1.70217	0.231002	0.587486	-0.767374
212	307	tr|L7N095|L7N095_CANLF	N/A	N/A	Keratin 5 OS	Canis lupus familiaris GN	TRUE	-16.2791	3.4198e-06	223332	570509	222483	563299	10139.2	41430.5	-347177	0.391461	-0.407311	2.55453	1.35306
213	567	tr|A0A131XTW8|A0A131XTW8_IXORI	N/A	N/A	Putative muscle m-line assembly protein unc-89 (Fragment) OS	Ixodes ricinus PE	TRUE	16.2476	3.4589e-06	258907	182087	256699	180939	7496.17	5764.25	76820.1	1.42189	0.152865	0.703291	-0.507806
214	804	tr|B7PRW2|B7PRW2_IXOSC	N/A	N/A	Insect cuticle domaincontaining protein OS	Ixodes scapularis GN	TRUE	16.0426	3.7272e-06	183734	133845	183543	134568	3969.01	4788.54	49888.9	1.37274	0.137587	0.728472	-0.457054
215	128	tr|A0A224Z4W7|A0A224Z4W7_9ACAR	N/A	N/A	Myosin regulatory light chain ef hand protein superfamily OS	Rhipicephalus zambeziensis PE	TRUE	15.9912	3.7982e-06	823530	688905	825308	685749	10188.5	13404.9	134625	1.19542	0.07752	0.836527	-0.257516
216	771	tr|A0A224Y9I2|A0A224Y9I2_9ACAR	N/A	N/A	Glycine rich superfamily member (Fragment) OS	Rhipicephalus zambeziensis PE	TRUE	-15.9791	3.815e-06	12535.8	74658.1	14624	74171.4	6663.83	4006.34	-62122.4	0.167909	-0.774926	5.95561	2.57425
217	203	tr|L7M7D4|L7M7D4_9ACAR	N/A	N/A	Putative nadh:ubiquinone oxidoreductase ndufv2/24 kd subunit OS	Rhipicephalus pulchellus PE	TRUE	-15.9543	3.8501e-06	285225	553476	283342	552968	11001.5	31776.8	-268251	0.515334	-0.287911	1.94049	0.956419
218	755	tr|A0A224YRN6|A0A224YRN6_9ACAR	N/A	N/A	2,3-bisphosphoglycerate-independent phosphoglycerate mutase OS	Rhipicephalus zambeziensis PE	TRUE	15.7675	4.1261e-06	75809.1	5815.74	75205.4	1697.29	2217.48	8596.83	69993.4	13.0352	1.11512	0.0767155	-3.70434
219	875	tr|A0A131XAM3|A0A131XAM3_9ACAR	N/A	N/A	Putative secreted salivary gland peptide OS	Hyalomma excavatum PE	TRUE	15.7263	4.19e-06	63997.8	3790.77	61917.7	3325.57	7477.98	1645.39	60207	16.8825	1.22744	0.0592329	-4.07746
220	536	tr|L7M9B9|L7M9B9_9ACAR	N/A	N/A	Putative amblyomma 40-33 family member OS	Rhipicephalus pulchellus PE	TRUE	15.693	4.2425e-06	102060	63112.4	101652	63022	2797.32	4100.44	38947.8	1.61712	0.208742	0.618384	-0.693425
221	570	tr|A0A224YEW2|A0A224YEW2_9ACAR	N/A	N/A	Glycine rich superfamily member (Fragment) OS	Rhipicephalus zambeziensis PE	TRUE	-15.6226	4.356e-06	76766.1	171992	76594.1	170849	3869.83	11560.2	-95225.9	0.446335	-0.350339	2.24047	1.1638
222	368	tr|A0A224YRZ4|A0A224YRZ4_9ACAR	N/A	N/A	Isocitrate dehydrogenase [NAD] subunit, mitochondrial OS	Rhipicephalus zambeziensis PE	TRUE	-15.5928	4.4052e-06	86223	130016	84535.8	130534	3576.31	4331.49	-43793.1	0.663172	-0.178374	1.50791	0.592546
223	574	tr|A0A131YMS3|A0A131YMS3_RHIAP	N/A	N/A	Aldehyde dehydrogenase (NAD+) OS	Rhipicephalus appendiculatus PE	TRUE	15.5917	4.407e-06	88283.1	39949.6	87610.1	38926	5083.75	3548.85	48333.5	2.20986	0.344365	0.452517	-1.14396
224	653	tr|Q2VMW1|Q2VMW1_DERAN	N/A	N/A	Histamine release factor OS	Dermacentor andersoni PE	TRUE	15.4452	4.6582e-06	50166.1	20900.7	50460	20566.2	3233.34	1976.46	29265.4	2.40021	0.380249	0.41663	-1.26316
225	510	tr|A0A224YIL5|A0A224YIL5_9ACAR	N/A	N/A	Uncharacterized protein OS	Rhipicephalus zambeziensis PE	TRUE	15.4338	4.6784e-06	120733	16390.2	115754	17050.3	13323.5	2304.35	104343	7.36617	0.867242	0.135756	-2.88091
226	499	tr|Q4PM27|Q4PM27_IXOSC	N/A	N/A	Ribosomal protein L11 OS	Ixodes scapularis GN	TRUE	-15.4028	4.734e-06	95905.8	150383	94982.9	149375	4878.08	5122.67	-54477.5	0.637742	-0.195355	1.56803	0.648954
227	36	tr|A0A224ZC41|A0A224ZC41_9ACAR	N/A	N/A	Z band alternatively spliced pdz motif protein 66 OS	Rhipicephalus zambeziensis PE	TRUE	15.3642	4.8041e-06	1.89751e+06	1.29241e+06	1.90367e+06	1.31788e+06	32772.7	71627.1	605110	1.4682	0.166786	0.681104	-0.554053
228	395	tr|A0A224Z0G4|A0A224Z0G4_9ACAR	N/A	N/A	Heterogeneous nuclear ribonucleoprotein U-like protein 1 OS	Rhipicephalus zambeziensis PE	TRUE	-15.3274	4.8723e-06	139797	174118	140277	175957	1451.62	4236.66	-34321.4	0.802884	-0.0953471	1.24551	0.316736
229	12	tr|A0A131YSR5|A0A131YSR5_RHIAP	N/A	N/A	Vitellogenin B OS	Rhipicephalus appendiculatus PE	TRUE	15.2917	4.9393e-06	819900	349805	838236	353840	53890.7	29597.4	470095	2.34388	0.369935	0.426644	-1.2289
230	312	tr|A0A131YV69|A0A131YV69_RHIAP	N/A	N/A	Serine carboxypeptidase OS	Rhipicephalus appendiculatus PE	TRUE	15.2867	4.9489e-06	92240	24668.7	91465.8	24819.3	3985.83	7891.02	67571.4	3.73915	0.572773	0.26744	-1.90271
231	153	tr|A0A224Z1V0|A0A224Z1V0_9ACAR	N/A	N/A	Elongation factor Tu OS	Rhipicephalus zambeziensis PE	TRUE	-15.2117	5.0937e-06	208425	302631	206190	305089	5271.7	11208.1	-94205.9	0.68871	-0.161964	1.45199	0.538032
232	254	tr|A0A224YUJ4|A0A224YUJ4_9ACAR	N/A	N/A	Leucyl aminopeptidase OS	Rhipicephalus zambeziensis PE	TRUE	15.1126	5.2929e-06	184391	65387.9	184546	59341.4	6606.16	14296.3	119003	2.81995	0.450242	0.354616	-1.49567
233	62	tr|L7MEG0|L7MEG0_9ACAR	N/A	N/A	Putative heat shock protein (Fragment) OS	Rhipicephalus pulchellus PE	TRUE	14.9963	5.5383e-06	522871	342226	519747	344847	14372.1	19335.7	180645	1.52785	0.184082	0.654513	-0.611507
234	715	tr|A0A224Z2Z3|A0A224Z2Z3_9ACAR	N/A	N/A	Ubiquitin carboxyl-terminal hydrolase OS	Rhipicephalus zambeziensis PE	TRUE	14.922	5.702e-06	33754.1	14530.4	34082.7	14403	1366.88	2184.11	19223.7	2.32299	0.366048	0.430479	-1.21599
235	313	tr|L7M7R5|L7M7R5_9ACAR	N/A	N/A	Putative cathepsin d isoform 1 protein OS	Rhipicephalus pulchellus PE	TRUE	14.8833	5.7894e-06	322048	181354	320039	177379	8834.06	16715.5	140694	1.7758	0.249393	0.563128	-0.828465
236	586	tr|A0A224YSU8|A0A224YSU8_9ACAR	N/A	N/A	M20 domain containing peptidase OS	Rhipicephalus zambeziensis PE	TRUE	14.7814	6.0271e-06	46468.7	9346.11	46852.2	10409.9	2423.23	4399.68	37122.6	4.97198	0.69653	0.201127	-2.31382
237	140	tr|V5I1T0|V5I1T0_IXORI	N/A	N/A	Histone H2B OS	Ixodes ricinus PE	TRUE	-14.7567	6.0865e-06	1.8307e+07	2.91787e+07	1.82809e+07	2.94118e+07	640041	1.32718e+06	-1.08717e+07	0.627411	-0.202448	1.59385	0.672517
238	295	tr|Q4PMD3|Q4PMD3_IXOSC	N/A	N/A	40S ribosomal protein S10 OS	Ixodes scapularis GN	TRUE	-14.715	6.1883e-06	380026	473080	378567	473237	6493.86	10853	-93053.5	0.803303	-0.0951208	1.24486	0.315984
239	489	sp|P49822|ALBU_CANLF	N/A	N/A	Serum albumin OS	Canis lupus familiaris GN	TRUE	14.4722	6.8215e-06	47279.6	17924.7	47519.5	18388.6	2706.34	3022.05	29354.9	2.63768	0.421223	0.37912	-1.39927
240	275	tr|L7N0F2|L7N0F2_CANLF	N/A	N/A	Uncharacterized protein OS	Canis lupus familiaris PE	TRUE	14.4204	6.9664e-06	55883	3822.59	57301.9	3747.34	6685.58	2727.13	52060.4	14.6191	1.16492	0.0684035	-3.86979
241	644	tr|A0A0C9RSH1|A0A0C9RSH1_AMBAM	N/A	N/A	Putative ribosomal protein s15aa (Fragment) OS	Amblyomma americanum PE	TRUE	-14.4142	6.9839e-06	112261	172348	111183	170543	5162.86	6546.27	-60086.9	0.651363	-0.186177	1.53524	0.618466
242	477	tr|L7MLA8|L7MLA8_9ACAR	N/A	N/A	Putative head-elevated expression protein (Fragment) OS	Rhipicephalus pulchellus PE	TRUE	-14.4065	7.0056e-06	68270.6	107662	68711.3	107346	1741.36	5183.9	-39391.6	0.634119	-0.197829	1.57699	0.657175
243	892	tr|C9W1C1|C9W1C1_RHISA	N/A	N/A	NADH CoQ oxidoreductase subunit B18 OS	Rhipicephalus sanguineus PE	TRUE	-14.3952	7.0379e-06	32434.1	48811.5	32541.1	48525.6	1465.52	1740.6	-16377.4	0.664477	-0.17752	1.50494	0.58971
244	196	tr|A0A224YG94|A0A224YG94_9ACAR	N/A	N/A	Phosphoglycerate kinase OS	Rhipicephalus zambeziensis PE	TRUE	14.3454	7.1822e-06	333189	262561	332230	265291	6626.82	7283.11	70627.7	1.269	0.10346	0.788025	-0.343687
245	809	tr|A0A224Z418|A0A224Z418_9ACAR	N/A	N/A	Phenylpyruvate tautomerase OS	Rhipicephalus zambeziensis PE	TRUE	14.3291	7.2301e-06	37290.3	10220.3	37239.6	9538.98	1306.92	3545.11	27070.1	3.64867	0.562134	0.274073	-1.86737
246	869	tr|Q8I862|Q8I862_DERVA	N/A	N/A	Factor D-like protein OS	Dermacentor variabilis PE	TRUE	14.2724	7.3997e-06	31210.4	10904.8	31400.2	10667.9	1652.78	2316.2	20305.6	2.86207	0.45668	0.349397	-1.51706
247	669	tr|L7ME67|L7ME67_9ACAR	N/A	N/A	Putative glycine rich protein (Fragment) OS	Rhipicephalus pulchellus PE	TRUE	-14.2303	7.5286e-06	18299.9	64142.9	18373.7	62365	266.779	6437.47	-45843	0.2853	-0.544699	3.50509	1.80945
248	905	tr|A0A224YYK7|A0A224YYK7_9ACAR	N/A	N/A	Salivary sulfotransferase OS	Rhipicephalus zambeziensis PE	TRUE	-14.1989	7.6267e-06	2399.84	18722.4	2170.75	17974.1	1303.9	1893.65	-16322.6	0.12818	-0.89218	7.80153	2.96376
249	449	tr|A0A023G4G2|A0A023G4G2_9ACAR	N/A	N/A	Putative cuticular protein 76bd OS	Amblyomma triste PE	TRUE	-14.1733	7.7076e-06	143832	238876	148687	235664	10747.1	8023.48	-95044.3	0.602119	-0.220317	1.6608	0.731879
250	72	tr|L7M073|L7M073_9ACAR	N/A	N/A	Putative heteroproteinous nuclear ribonucleoprotein r rrm superfamily OS	Rhipicephalus pulchellus PE	TRUE	14.1647	7.7349e-06	1.78277e+06	828396	1.77909e+06	876749	74092.6	112556	954377	2.15208	0.332858	0.464667	-1.10573
251	453	tr|A0A131Z235|A0A131Z235_RHIAP	N/A	N/A	Carboxylic ester hydrolase OS	Rhipicephalus appendiculatus PE	TRUE	-14.1318	7.8408e-06	21106	81004.3	20983.9	83600.8	2007.63	8235.93	-59898.3	0.260554	-0.584103	3.83798	1.94035
252	766	tr|B7PNL8|B7PNL8_IXOSC	N/A	N/A	Cysteine proteinase, putative (Fragment) OS	Ixodes scapularis GN	TRUE	-14.0289	8.1829e-06	154789	247565	157336	247334	10547	7980.9	-92775.4	0.625248	-0.203948	1.59937	0.6775
253	5	tr|L7LWI3|L7LWI3_9ACAR	N/A	N/A	Putative lipoprotein amino terminal region OS	Rhipicephalus pulchellus PE	TRUE	14.0196	8.2148e-06	4.30872e+06	1.11564e+06	4.24539e+06	1.12025e+06	451267	62076.4	3.19308e+06	3.86209	0.586823	0.258927	-1.94938
254	240	tr|A0A224Z2T5|A0A224Z2T5_9ACAR	N/A	N/A	Large subunit ribosomal protein L3e OS	Rhipicephalus zambeziensis PE	TRUE	-13.8708	8.7434e-06	127570	216028	125879	220428	5315.91	11594.1	-88458.4	0.590523	-0.228763	1.69341	0.759934
255	603	tr|L7MBP6|L7MBP6_9ACAR	N/A	N/A	Putative pterin carbinolamine dehydratase pcbd/dimerization cofactor of hnf1 (Fragment) OS	Rhipicephalus pulchellus PE	TRUE	13.6817	9.473e-06	35723.3	9894.42	35348.5	10977	1801.39	3318.26	25828.9	3.61045	0.557561	0.276974	-1.85218
256	99	tr|A0A224YYZ8|A0A224YYZ8_9ACAR	N/A	N/A	Fructose-bisphosphate aldolase OS	Rhipicephalus zambeziensis PE	TRUE	13.5669	9.9504e-06	847253	533359	854315	532312	35496.7	29685.7	313895	1.58852	0.200994	0.629515	-0.667688
257	169	tr|L7M6Z0|L7M6Z0_9ACAR	N/A	N/A	Putative rap1a member of ras oncoprotein family OS	Rhipicephalus pulchellus PE	TRUE	-13.5645	9.9605e-06	418868	582178	418152	582092	17150.9	16900.8	-163309	0.719485	-0.142978	1.38988	0.474963
258	278	tr|L7MAW2|L7MAW2_9ACAR	N/A	N/A	Uncharacterized protein OS	Rhipicephalus pulchellus PE	TRUE	-13.5587	9.9856e-06	21588.6	79703.5	22023.4	82062.2	3892.01	7637.91	-58114.9	0.270861	-0.567253	3.69193	1.88437
259	150	tr|A0A131YYU5|A0A131YYU5_RHIAP	N/A	N/A	Adenylate cyclase terminal differentiation specific OS	Rhipicephalus appendiculatus PE	TRUE	13.5091	1.0201e-05	359079	225100	358237	231192	5044.69	19183.1	133979	1.5952	0.202815	0.626881	-0.673737
260	63	tr|A0A224Z2M8|A0A224Z2M8_9ACAR	N/A	N/A	Isocitrate dehydrogenase [NADP] OS	Rhipicephalus zambeziensis PE	TRUE	13.5045	1.0222e-05	663844	321363	678303	318718	49221.4	12242.7	342481	2.06571	0.31507	0.484094	-1.04664
261	301	tr|F1PCK2|F1PCK2_CANLF	N/A	N/A	Alpha-1-B glycoprotein OS	Canis lupus familiaris GN	TRUE	13.374	1.0817e-05	428321	70901.4	428355	69004.2	12270.1	52022.4	357419	6.04108	0.781114	0.165533	-2.59481
262	187	tr|A0A131YF77|A0A131YF77_RHIAP	N/A	N/A	Elongation factor 1-gamma OS	Rhipicephalus appendiculatus PE	TRUE	13.3686	1.0843e-05	237481	148308	233776	149883	10944.5	7628.21	89172.2	1.60126	0.204462	0.624507	-0.67921
263	389	tr|L7M3U7|L7M3U7_9ACAR	N/A	N/A	Putative myosin light chain cytoplasmic OS	Rhipicephalus pulchellus PE	TRUE	13.3603	1.0882e-05	151275	125802	151334	126217	2918.11	2454.55	25472.5	1.20248	0.0800781	0.831614	-0.266014
264	568	tr|F1P841|F1P841_CANLF	N/A	N/A	GC, vitamin D binding protein OS	Canis lupus familiaris GN	TRUE	13.3463	1.0949e-05	131937	12935	127934	13483.6	17779.3	1382.72	119002	10.2	1.0086	0.0980388	-3.3505
265	123	tr|L7MAZ4|L7MAZ4_9ACAR	N/A	N/A	3-hydroxyisobutyryl-CoA hydrolase, mitochondrial OS	Rhipicephalus pulchellus PE	TRUE	13.3347	1.1004e-05	240877	197555	240116	196285	3481.16	5486.34	43321.7	1.21929	0.0861068	0.82015	-0.286041
266	353	tr|C9W1R6|C9W1R6_RHISA	N/A	N/A	Hematopoietic stem/progenitor cells protein-like protein OS	Rhipicephalus sanguineus PE	TRUE	-13.3184	1.1083e-05	111853	182309	111845	184820	897.592	10542.2	-70456.6	0.613532	-0.212162	1.62991	0.704789
267	849	tr|G3MSP2|G3MSP2_9ACAR	N/A	N/A	Uncharacterized protein OS	Amblyomma maculatum PE	TRUE	13.2757	1.1292e-05	194657	121455	197464	121797	10963.7	1188.93	73202.1	1.60271	0.204855	0.623943	-0.680513
268	690	tr|A0A1E1XED9|A0A1E1XED9_9ACAR	N/A	N/A	Putative methyltransferase OS	Amblyomma aureolatum PE	TRUE	13.2722	1.131e-05	36949.2	21827.5	36580.7	22081.7	2210.19	554.595	15121.7	1.69278	0.228601	0.590743	-0.759397
269	135	tr|A0A224YQG5|A0A224YQG5_9ACAR	N/A	N/A	Glutamine synthetase OS	Rhipicephalus zambeziensis PE	TRUE	-13.171	1.1825e-05	315844	580687	322494	592208	25224.8	31321.5	-264844	0.543913	-0.26447	1.83853	0.878551
270	229	tr|L7M6Q0|L7M6Q0_9ACAR	N/A	N/A	Eukaryotic translation initiation factor 5A OS	Rhipicephalus pulchellus PE	TRUE	-13.1707	1.1827e-05	111493	200956	113932	202559	6669.4	11835.3	-89462.8	0.554813	-0.255853	1.80241	0.849926
271	671	tr|L7M4J4|L7M4J4_9ACAR	N/A	N/A	Putative histone macroh2a1.1 strongylocentrotus purpuratus: similar to histone OS	Rhipicephalus pulchellus PE	TRUE	-13.145	1.1962e-05	33444.8	46949.6	33386.4	47068.1	475.046	1999.07	-13504.8	0.712356	-0.147303	1.40379	0.48933
272	843	tr|L7M9R9|L7M9R9_9ACAR	N/A	N/A	Putative dnaj domain prokaryotic heat shock protein OS	Rhipicephalus pulchellus PE	TRUE	-13.1312	1.2036e-05	3676.79	28556.4	3473.3	28522.7	460.599	3761.3	-24879.6	0.128755	-0.890235	7.76666	2.9573
273	180	tr|A0A224YID5|A0A224YID5_9ACAR	N/A	N/A	40S ribosomal protein S7 OS	Rhipicephalus zambeziensis PE	TRUE	-13.0194	1.265e-05	655149	1.03846e+06	662575	1.03147e+06	17846	56114.2	-383313	0.630884	-0.200051	1.58508	0.664554
274	496	tr|A0A1E1X921|A0A1E1X921_9ACAR	N/A	N/A	Galectin OS	Amblyomma aureolatum PE	TRUE	-13.0071	1.272e-05	287138	368978	287761	370959	5281.1	11422.1	-81839.7	0.778199	-0.108909	1.28502	0.361789
275	74	tr|A0A224YZR0|A0A224YZR0_9ACAR	N/A	N/A	Solute carrier family 25 (Mitochondrial adenine nucleotide translocator) member 4/5/6/31 OS	Rhipicephalus zambeziensis PE	TRUE	-12.9633	1.2972e-05	935931	1.63178e+06	933410	1.63083e+06	10824.2	106809	-695846	0.573566	-0.241417	1.74348	0.80197
276	770	tr|L7MG30|L7MG30_9ACAR	N/A	N/A	Uncharacterized protein (Fragment) OS	Rhipicephalus pulchellus PE	TRUE	-12.9618	1.2981e-05	356899	539023	367223	539349	24403.3	13934.9	-182124	0.662123	-0.179062	1.51029	0.59483
277	170	tr|C9W1L7|C9W1L7_RHISA	N/A	N/A	60S ribosomal protein L9 OS	Rhipicephalus sanguineus PE	TRUE	-12.9321	1.3155e-05	210387	344976	205976	347608	9954.85	18279.8	-134589	0.609861	-0.214769	1.63972	0.713447
278	799	tr|L7LTS4|L7LTS4_9ACAR	N/A	N/A	Putative monotil peptide OS	Rhipicephalus pulchellus PE	TRUE	-12.9314	1.3159e-05	5210.5	59472.5	5702.88	58538.9	1823.26	8191.81	-54262	0.0876119	-1.05744	11.414	3.51273
279	754	tr|A0A131Y4S1|A0A131Y4S1_IXORI	N/A	N/A	Putative aconitase/aconitase aconitase superfamily OS	Ixodes ricinus PE	TRUE	12.7576	1.4237e-05	121100	86477.4	120138	87194.9	3385.19	4242.85	34622.9	1.40037	0.146243	0.714097	-0.485808
280	621	tr|A0A224Y5E8|A0A224Y5E8_9ACAR	N/A	N/A	Cubilin OS	Rhipicephalus zambeziensis PE	TRUE	12.7515	1.4276e-05	152274	119951	152312	120038	1760.59	4754.2	32323.2	1.26947	0.103622	0.78773	-0.344226
281	792	tr|L7MHT4|L7MHT4_9ACAR	N/A	N/A	Putative glycine rich protein (Fragment) OS	Rhipicephalus pulchellus PE	TRUE	-12.6506	1.4951e-05	21149.6	38575.4	21997.5	38450.2	2630.05	820.049	-17425.7	0.548268	-0.261007	1.82393	0.867048
282	602	tr|L7LRY7|L7LRY7_9ACAR	N/A	N/A	Putative tick salivary serpin OS	Rhipicephalus pulchellus PE	TRUE	12.549	1.5667e-05	30739.8	14149.1	30303.5	15106.1	1105.54	2401.91	16590.6	2.17255	0.33697	0.460288	-1.11939
283	195	tr|L7LXX6|L7LXX6_9ACAR	N/A	N/A	Putative rna-binding protein hnrnp-m OS	Rhipicephalus pulchellus PE	TRUE	-12.3794	1.6956e-05	322511	473692	327621	467642	20548.7	13202.9	-151181	0.680845	-0.166952	1.46876	0.554601
284	416	tr|L7M653|L7M653_9ACAR	N/A	N/A	Uncharacterized protein OS	Rhipicephalus pulchellus PE	TRUE	12.3668	1.7056e-05	570149	409798	568853	413331	9187.35	24250.5	160351	1.39129	0.143419	0.718756	-0.476426
285	543	tr|A0A224YMP8|A0A224YMP8_9ACAR	N/A	N/A	Aldehyde reductase OS	Rhipicephalus zambeziensis PE	TRUE	12.3624	1.7091e-05	72283	33863.1	72938.1	33487.4	2740.1	5579.04	38420	2.13457	0.32931	0.468479	-1.09394
286	376	tr|L7MFB1|L7MFB1_9ACAR	N/A	N/A	Putative transcription factor l2 (Fragment) OS	Rhipicephalus pulchellus PE	TRUE	12.3429	1.7249e-05	77678.1	38510.3	78096.3	40184.2	4687.23	4278.98	39167.8	2.01707	0.304722	0.495768	-1.01226
287	700	tr|G3MMF8|G3MMF8_9ACAR	N/A	N/A	Uncharacterized protein OS	Amblyomma maculatum PE	TRUE	-12.3313	1.7342e-05	139242	206945	139874	209415	2519.29	10687.7	-67702.6	0.672847	-0.172083	1.48622	0.571649
288	649	tr|A0A224YS90|A0A224YS90_9ACAR	N/A	N/A	Ribosomal protein L15 OS	Rhipicephalus zambeziensis PE	TRUE	-12.2777	1.7786e-05	30980.2	62487.3	32181.9	62821	4172.24	2989	-31507.1	0.495783	-0.304708	2.01701	1.01222
289	865	tr|V5HHG8|V5HHG8_IXORI	N/A	N/A	40S ribosomal protein S30 OS	Ixodes ricinus PE	TRUE	12.2715	1.7838e-05	57206.7	33792.2	56401.6	33566.7	1908.89	3304.32	23414.5	1.6929	0.228631	0.590703	-0.759495
290	64	tr|A0A224YZ57|A0A224YZ57_9ACAR	N/A	N/A	Galectin OS	Rhipicephalus zambeziensis PE	TRUE	-12.253	1.7995e-05	87114.5	266288	76679.4	259326	22875.1	18221.8	-179173	0.327144	-0.485261	3.05676	1.612
291	56	tr|L7M2C1|L7M2C1_9ACAR	N/A	N/A	Putative prohibitin OS	Rhipicephalus pulchellus PE	TRUE	-12.248	1.8038e-05	1.23361e+06	1.59329e+06	1.23212e+06	1.57568e+06	31954.5	49279.4	-359680	0.774252	-0.111117	1.29157	0.369124
292	763	tr|A0A0C9R303|A0A0C9R303_AMBAM	N/A	N/A	Putative hnrnp-l/ptb/hephaestus splicing factor family (Fragment) OS	Amblyomma americanum PE	TRUE	-12.2241	1.8244e-05	43278.9	79597.1	44138	77700	2456.67	5410.47	-36318.2	0.543725	-0.264621	1.83917	0.879052
293	160	tr|L7MAQ1|L7MAQ1_9ACAR	N/A	N/A	Putative cytochrome b-c1 complex subunit 2 mitochondrial OS	Rhipicephalus pulchellus PE	TRUE	-12.127	1.9106e-05	306122	627678	303281	627896	20620	48858.4	-321556	0.487705	-0.311843	2.05042	1.03592
294	864	tr|L7M3S2|L7M3S2_9ACAR	N/A	N/A	Putative elongation factor 1 beta OS	Rhipicephalus pulchellus PE	TRUE	12.1224	1.9148e-05	30935	7228.77	30983.3	7448.13	997.917	3781.69	23706.2	4.27943	0.631385	0.233676	-2.09742
295	420	tr|A0A224YZ73|A0A224YZ73_9ACAR	N/A	N/A	GMP synthase (Glutamine-hydrolysing) OS	Rhipicephalus zambeziensis PE	TRUE	12.1171	1.9196e-05	80522.6	32848.8	81710.6	34341.7	4553.65	6417.35	47673.7	2.45131	0.389397	0.407946	-1.29355
296	276	tr|C9W1K7|C9W1K7_RHISA	N/A	N/A	Cytochrome c oxidase polypeptide Vb OS	Rhipicephalus sanguineus PE	TRUE	12.0129	2.0181e-05	325469	237406	322436	234596	9450.14	11209.4	88063	1.37094	0.137018	0.729428	-0.455163
297	780	tr|B7Q730|B7Q730_IXOSC	N/A	N/A	Cuticular protein, putative OS	Ixodes scapularis GN	TRUE	-11.9927	2.0379e-05	120109	150917	120441	150949	3900.33	3344.18	-30807.5	0.795865	-0.0991608	1.2565	0.329405
298	363	tr|L7MAP0|L7MAP0_9ACAR	N/A	N/A	Putative aromatic amino acid hydroxylase OS	Rhipicephalus pulchellus PE	TRUE	-11.9908	2.0398e-05	32011.8	62275.9	31338.9	61499.5	1781.02	4723.24	-30264	0.514033	-0.289009	1.9454	0.960068
299	371	tr|L7MAS7|L7MAS7_9ACAR	N/A	N/A	Tubulin beta chain OS	Rhipicephalus pulchellus PE	TRUE	-11.9476	2.0828e-05	85382.2	402198	62576.6	402546	49328.5	19475.6	-316816	0.212289	-0.673072	4.71056	2.2359
300	237	tr|A0A224YPN8|A0A224YPN8_9ACAR	N/A	N/A	ATP synthase subunit d, mitochondrial OS	Rhipicephalus zambeziensis PE	TRUE	-11.8214	2.2149e-05	390891	665485	391079	668800	11069.5	45119.2	-274594	0.587377	-0.231083	1.70248	0.76764
301	662	tr|J9P028|J9P028_CANLF	N/A	N/A	Glutathione peroxidase OS	Canis lupus familiaris GN	TRUE	11.7825	2.2575e-05	128481	30321.3	128734	29470.5	6746.4	15235.1	98160	4.23733	0.627092	0.235998	-2.08316
302	85	tr|A0A1E1X7J7|A0A1E1X7J7_9ACAR	N/A	N/A	Putative muscle m-line assembly protein unc-89 (Fragment) OS	Amblyomma aureolatum PE	TRUE	11.6892	2.3637e-05	254768	173896	257483	176017	9565.32	9998.69	80872.8	1.46507	0.165857	0.682563	-0.550965
303	214	tr|A0A224Z7S1|A0A224Z7S1_9ACAR	N/A	N/A	Thioredoxin/protein disulfide isomerase OS	Rhipicephalus zambeziensis PE	TRUE	11.6357	2.4271e-05	122154	73821.7	120527	71793.6	5876.22	5872.58	48332.7	1.65472	0.218725	0.604331	-0.726588
304	440	tr|F2Z4N8|F2Z4N8_CANLF	N/A	N/A	Uncharacterized protein OS	Canis lupus familiaris GN	TRUE	11.5847	2.4895e-05	1.21077e+06	871404	1.20379e+06	873223	57454.6	11475	339368	1.38945	0.142843	0.719709	-0.474514
305	817	tr|A0A131Z0R7|A0A131Z0R7_RHIAP	N/A	N/A	Glycine rich superfamily member OS	Rhipicephalus appendiculatus PE	TRUE	-11.5516	2.5309e-05	55014.2	115452	55743	113951	2885.04	10058.4	-60437.9	0.476511	-0.321927	2.09859	1.06942
306	629	tr|R4JQY0|R4JQY0_RHIMP	N/A	N/A	Calreticulin (Fragment) OS	Rhipicephalus microplus PE	TRUE	11.5012	2.5957e-05	44593.1	18229.5	44243.3	17866.1	1114.45	4446.99	26363.6	2.4462	0.388492	0.408797	-1.29054
307	474	tr|L7MM36|L7MM36_9ACAR	N/A	N/A	Putative short-chain alcohol dehydrogenase/3-hydroxyacyl-coa dehydrogenase (Fragment) OS	Rhipicephalus pulchellus PE	TRUE	11.4952	2.6035e-05	93184.1	45867	92384.2	46225.7	2035.39	7976.93	47317.1	2.03162	0.307842	0.492219	-1.02263
308	1	tr|A0A131YQK6|A0A131YQK6_RHIAP	N/A	N/A	Titin OS	Rhipicephalus appendiculatus PE	TRUE	11.4692	2.6377e-05	1.1615e+06	894485	1.15761e+06	906785	15186.2	44015.8	267015	1.29851	0.113446	0.770112	-0.376859
309	340	tr|A0A224YKT1|A0A224YKT1_9ACAR	N/A	N/A	Cytosol aminopeptidase OS	Rhipicephalus zambeziensis PE	TRUE	11.4376	2.6801e-05	101184	54669.9	101277	55818	5523.11	5970.74	46514	1.85082	0.267363	0.540302	-0.888162
310	102	tr|A0A131YRS4|A0A131YRS4_RHIAP	N/A	N/A	F479582_1 paramyosin OS	Rhipicephalus appendiculatus PE	TRUE	-11.2751	2.9106e-05	504312	592302	501456	595952	8538.22	13065.5	-87990.7	0.851443	-0.0698445	1.17448	0.232018
311	782	tr|G3MPE6|G3MPE6_9ACAR	N/A	N/A	Cystatin OS	Amblyomma maculatum PE	TRUE	11.2678	2.9214e-05	14697.9	3386.02	14515.8	3637.01	413.656	1964.75	11311.9	4.34075	0.637565	0.230375	-2.11795
312	29	tr|A0A224YTJ8|A0A224YTJ8_9ACAR	N/A	N/A	Ankyrin OS	Rhipicephalus zambeziensis PE	TRUE	-11.2668	2.9229e-05	268343	396958	271836	397579	20673.7	9687.3	-128615	0.675998	-0.170055	1.47929	0.564909
313	44	tr|A0A224YZ31|A0A224YZ31_9ACAR	N/A	N/A	Alpha-1,4 glucan phosphorylase OS	Rhipicephalus zambeziensis PE	TRUE	-11.2434	2.9582e-05	356170	468642	354874	466609	9861.43	17407.6	-112472	0.760005	-0.119184	1.31578	0.39592
314	270	tr|A0A224Z4R6|A0A224Z4R6_9ACAR	N/A	N/A	NADH dehydrogenase (Ubiquinone) 1 beta subcomplex subunit 6 OS	Rhipicephalus zambeziensis PE	TRUE	-11.2348	2.9713e-05	153967	245298	153782	243417	10920.5	12045.1	-91330.9	0.627673	-0.202266	1.59319	0.671915
315	824	tr|L7M8V5|L7M8V5_9ACAR	N/A	N/A	Isocitrate dehydrogenase [NADP] OS	Rhipicephalus pulchellus PE	TRUE	11.1835	3.0506e-05	88167.2	16613.2	87205.5	13303.9	10187.2	7743.9	71554	5.30706	0.724854	0.188428	-2.40791
316	171	tr|A0A224YWJ9|A0A224YWJ9_9ACAR	N/A	N/A	Acetyltransferase component of pyruvate dehydrogenase complex OS	Rhipicephalus zambeziensis PE	TRUE	-11.1799	3.0563e-05	273485	391578	276980	396425	14388.4	15468.6	-118093	0.698418	-0.155885	1.43181	0.517837
317	655	tr|A0A131XNW8|A0A131XNW8_9ACAR	N/A	N/A	Putative thimet oligopeptidase (Fragment) OS	Hyalomma excavatum PE	TRUE	11.1237	3.1463e-05	40566.6	23748.7	40206.5	23861.6	2884.1	908.454	16817.9	1.70816	0.232528	0.585426	-0.772442
318	736	tr|A0A131Z012|A0A131Z012_RHIAP	N/A	N/A	Sepiapterin reductase OS	Rhipicephalus appendiculatus PE	TRUE	11.1023	3.1813e-05	18946.3	8562.8	19267.3	8872.57	788.855	1696.02	10383.5	2.21262	0.344908	0.451952	-1.14576
319	565	tr|L7MJ32|L7MJ32_9ACAR	N/A	N/A	Putative ribosomal protein l17 (Fragment) OS	Rhipicephalus pulchellus PE	TRUE	-11.1005	3.1843e-05	185578	218472	185097	219609	4270.86	4109.12	-32894.3	0.849435	-0.0708701	1.17725	0.235425
320	419	tr|B7SP19|B7SP19_DERVA	N/A	N/A	Quinoid dihydropteridine reductase OS	Dermacentor variabilis PE	TRUE	11.0888	3.2038e-05	286892	155258	288793	161230	8401.94	22205.4	131633	1.84783	0.266663	0.541174	-0.885835
321	455	tr|A0A224YNS0|A0A224YNS0_9ACAR	N/A	N/A	Serine protease inhibitor OS	Rhipicephalus zambeziensis PE	TRUE	11.0145	3.33e-05	284898	110592	277181	110700	31591.1	1932.4	174306	2.57612	0.410966	0.388181	-1.3652
322	427	tr|A0A224YIC5|A0A224YIC5_9ACAR	N/A	N/A	4-hydroxyphenylpyruvate dioxygenase OS	Rhipicephalus zambeziensis PE	TRUE	11.0069	3.3434e-05	127719	103882	128663	103058	2647.61	3427.89	23837.1	1.22946	0.0897152	0.813364	-0.298027
323	92	tr|L7M706|L7M706_9ACAR	N/A	N/A	Putative oligomycin sensitivity-conferring protein OS	Rhipicephalus pulchellus PE	TRUE	-10.9978	3.3593e-05	1.41026e+06	1.81239e+06	1.39205e+06	1.79589e+06	43128.4	59056.2	-402122	0.778125	-0.10895	1.28514	0.361926
324	143	tr|A0A224YR66|A0A224YR66_9ACAR	N/A	N/A	Cytosolic ca2+ dependent cysteine protease OS	Rhipicephalus zambeziensis PE	TRUE	10.9243	3.4913e-05	384154	271066	383788	269239	3901.74	20333	113088	1.4172	0.151431	0.705617	-0.503043
325	585	tr|A0A224YIR8|A0A224YIR8_9ACAR	N/A	N/A	Uncharacterized protein OS	Rhipicephalus zambeziensis PE	TRUE	10.8284	3.6728e-05	53715.3	27381.7	54620.5	26301.9	2705.69	4041.77	26333.6	1.96172	0.292637	0.509756	-0.97212
326	859	tr|A0A023GM04|A0A023GM04_9ACAR	N/A	N/A	Putative calpain-a OS	Amblyomma triste PE	TRUE	10.7639	3.8009e-05	29571.2	6010.19	29525.5	5346.41	2042.94	3871.86	23561	4.92018	0.691981	0.203245	-2.29871
327	286	tr|L7LY48|L7LY48_9ACAR	N/A	N/A	Putative transcriptional regulator dj-1 OS	Rhipicephalus pulchellus PE	TRUE	-10.7353	3.8595e-05	93073.9	170323	95061.6	169240	4555.45	13651.7	-77249.2	0.546455	-0.262446	1.82998	0.871826
328	841	tr|A0A224Y7Y3|A0A224Y7Y3_9ACAR	N/A	N/A	Uncharacterized protein OS	Rhipicephalus zambeziensis PE	TRUE	-10.7234	3.884e-05	3483.25	21789.4	3284.12	21876.2	2381.69	2446.34	-18306.2	0.15986	-0.796261	6.25549	2.64512
329	134	tr|L7M721|L7M721_9ACAR	N/A	N/A	Putative lipoprotein amino terminal region OS	Rhipicephalus pulchellus PE	TRUE	-10.6512	4.0375e-05	236327	379202	235172	383399	5729.99	26208.9	-142875	0.623221	-0.205358	1.60457	0.682184
330	426	tr|G3MIA4|G3MIA4_9ACAR	N/A	N/A	Uncharacterized protein (Fragment) OS	Amblyomma maculatum PE	TRUE	10.5892	4.1751e-05	192812	56810.3	204715	55524.8	24388.8	8062.35	136001	3.39396	0.530707	0.294641	-1.76297
331	537	tr|L7MBH0|L7MBH0_9ACAR	N/A	N/A	Putative secreted peptide OS	Rhipicephalus pulchellus PE	TRUE	10.5249	4.3235e-05	87033.3	24762.3	87725.5	24653.8	2461.93	11574.2	62271	3.51475	0.545894	0.284516	-1.81342
332	622	tr|A0A131XP84|A0A131XP84_9ACAR	N/A	N/A	Aconitate hydratase, mitochondrial OS	Hyalomma excavatum PE	TRUE	-10.4897	4.4072e-05	131576	213331	130521	215251	6094.35	14346.9	-81754.6	0.616771	-0.209876	1.62135	0.697193
333	720	tr|A0A1E1WZ73|A0A1E1WZ73_9ACAR	N/A	N/A	Putative atp synthase d chain (Fragment) OS	Amblyomma aureolatum PE	TRUE	10.4465	4.5126e-05	109337	40353.4	107572	40555.5	13053.6	2006.83	68983.2	2.70948	0.432886	0.369075	-1.43801
334	192	tr|A0A224YSG5|A0A224YSG5_9ACAR	N/A	N/A	Large subunit ribosomal protein L5e OS	Rhipicephalus zambeziensis PE	TRUE	-10.3763	4.6901e-05	275658	425318	274525	428059	7956.39	27727.5	-149660	0.648122	-0.188343	1.54292	0.625663
335	156	tr|A0A131ZAT8|A0A131ZAT8_RHIAP	N/A	N/A	Laminin, gamma 1 (Fragment) OS	Rhipicephalus appendiculatus PE	TRUE	10.36	4.7325e-05	74976.1	26489.2	75214.7	25669.9	7603.3	5459.56	48486.9	2.83044	0.451854	0.353302	-1.50103
336	591	tr|L7MGQ7|L7MGQ7_9ACAR	N/A	N/A	Putative ribose 5-phosphate isomerase (Fragment) OS	Rhipicephalus pulchellus PE	TRUE	10.3282	4.8166e-05	28505.1	10328.4	27911.8	10048.1	2352.97	2617.8	18176.8	2.75989	0.440892	0.362333	-1.46461
337	400	tr|A0A131XJZ4|A0A131XJZ4_9ACAR	N/A	N/A	Cytochrome b-c1 complex subunit 7 OS	Hyalomma excavatum PE	TRUE	-10.3233	4.8296e-05	96455.1	118146	97395.3	118129	3236.96	2679.73	-21690.4	0.816409	-0.0880922	1.22488	0.292636
338	144	tr|A0A224YQ83|A0A224YQ83_9ACAR	N/A	N/A	40s ribosomal protein s3 OS	Rhipicephalus zambeziensis PE	TRUE	-10.3181	4.8434e-05	615260	819826	614197	831546	12297.9	37696.4	-204566	0.750476	-0.124663	1.33249	0.414122
339	390	tr|A0A224YVV2|A0A224YVV2_9ACAR	N/A	N/A	Phosphoglucomutase OS	Rhipicephalus zambeziensis PE	TRUE	10.2694	4.9762e-05	88499.1	39660.9	88111	39361.4	8310.86	4625.54	48838.2	2.2314	0.348577	0.44815	-1.15795
340	855	tr|A0A224YCP5|A0A224YCP5_9ACAR	N/A	N/A	Glycine rich superfamily member OS	Rhipicephalus zambeziensis PE	TRUE	10.2626	4.9952e-05	16456	5982.36	16405.3	5183.43	990.79	1784.53	10473.6	2.75075	0.439451	0.363537	-1.45983
341	676	tr|F1PW65|F1PW65_CANLF	N/A	N/A	Fibrinogen beta chain OS	Canis lupus familiaris GN	TRUE	10.261	4.9997e-05	38015.6	6674.23	37370.6	4828.01	2385.17	5623.95	31341.3	5.69587	0.75556	0.175566	-2.50992
342	288	tr|F1PDJ5|F1PDJ5_CANLF	N/A	N/A	Apolipoprotein A-I OS	Canis lupus familiaris GN	TRUE	10.2018	5.1677e-05	510469	77674.1	511536	40385.8	3215.2	84785.8	432795	6.57193	0.817693	0.152162	-2.71632
343	190	tr|L7M3S8|L7M3S8_9ACAR	N/A	N/A	Putative ribosomal protein s16 OS	Rhipicephalus pulchellus PE	TRUE	-10.1858	5.2142e-05	886195	1.10051e+06	885230	1.09734e+06	16106.7	38875.9	-214312	0.805261	-0.0940635	1.24183	0.312472
344	3	tr|A0A131Z9Z9|A0A131Z9Z9_RHIAP	N/A	N/A	Heparan sulfate proteoglycan 2 (Fragment) OS	Rhipicephalus appendiculatus PE	TRUE	-10.1769	5.2403e-05	647376	755963	647327	762724	14329.1	15813.4	-108587	0.856359	-0.0673439	1.16773	0.223712
345	306	tr|A0A224YWL8|A0A224YWL8_9ACAR	N/A	N/A	Fructose-1,6-bisphosphatase (Fragment) OS	Rhipicephalus zambeziensis PE	TRUE	10.1629	5.2816e-05	223461	138273	223553	141911	8687.3	14337.9	85187.6	1.61608	0.208463	0.61878	-0.6925
346	28	tr|L7MMT8|L7MMT8_9ACAR	N/A	N/A	Putative tick thioester protein (Fragment) OS	Rhipicephalus pulchellus PE	TRUE	10.1422	5.3438e-05	142043	60943.5	140978	56066.9	5413.87	15048.4	81099.7	2.33074	0.367493	0.429049	-1.22079
347	616	tr|C9W1U6|C9W1U6_RHISA	N/A	N/A	NADH ubiquinone oxidoreductase ashi subunit (Fragment) OS	Rhipicephalus sanguineus PE	TRUE	-10.0448	5.6462e-05	16061.5	40250.5	15710.3	39282.7	1445.57	4594.17	-24189.1	0.399038	-0.398986	2.50603	1.3254
348	380	tr|Q86G63|Q86G63_DERVA	N/A	N/A	40S ribosomal protein S11 OS	Dermacentor variabilis PE	TRUE	-10.0128	5.75e-05	239878	345272	242844	345823	10855.8	18037	-105394	0.694752	-0.15817	1.43936	0.525431
349	132	tr|A0A224Z4Q3|A0A224Z4Q3_9ACAR	N/A	N/A	40S ribosomal protein SA OS	Rhipicephalus zambeziensis PE	TRUE	-9.95444	5.9448e-05	523428	800359	526319	807963	7857.21	55082.1	-276931	0.653992	-0.184428	1.52907	0.612656
350	50	tr|A0A131YQ75|A0A131YQ75_RHIAP	N/A	N/A	Transglutaminase/protease like proteins OS	Rhipicephalus appendiculatus PE	TRUE	-9.88367	6.1914e-05	101416	118291	101117	117841	1502.16	3066.44	-16874.4	0.857348	-0.066843	1.16639	0.222047
351	813	tr|A0A224YSS4|A0A224YSS4_9ACAR	N/A	N/A	Erythrocyte membrane protein 1 OS	Rhipicephalus zambeziensis PE	TRUE	-9.87635	6.2176e-05	55149	77863.2	55074.4	79424.8	2222.82	4026.97	-22714.2	0.708281	-0.149795	1.41187	0.497607
352	174	tr|A0A131YR14|A0A131YR14_RHIAP	N/A	N/A	Splicing factor, proline-and glutamine-rich OS	Rhipicephalus appendiculatus PE	TRUE	-9.87122	6.236e-05	107611	146550	106657	143406	2850.3	7356.45	-38938.7	0.734298	-0.134128	1.36185	0.445563
353	461	tr|L7MF58|L7MF58_9ACAR	N/A	N/A	Putative emp24/gp25l/p24 family of membrane trafficking (Fragment) OS	Rhipicephalus pulchellus PE	TRUE	-9.83548	6.3661e-05	34909.6	67573.1	35174.1	68998.3	4879.78	4505.93	-32663.5	0.51662	-0.286828	1.93566	0.952824
354	433	tr|L7MBX9|L7MBX9_9ACAR	N/A	N/A	Putative ml domain protein OS	Rhipicephalus pulchellus PE	TRUE	9.79278	6.5257e-05	175503	146162	175187	145446	4330.17	4142.25	29341	1.20074	0.0794502	0.832818	-0.263928
355	397	tr|A0A131XIF4|A0A131XIF4_9ACAR	N/A	N/A	Putative calpain-a OS	Hyalomma excavatum PE	TRUE	9.79252	6.5267e-05	236496	197827	237169	198618	2542.93	7476.89	38668.2	1.19546	0.0775366	0.836495	-0.257571
356	853	tr|Q4R0Q2|Q4R0Q2_9ACAR	N/A	N/A	cAMP-dependent protein kinase catalytic subunit OS	Amblyomma hebraeum GN	TRUE	-9.72731	6.7796e-05	25324.2	48142.2	26545.1	48371.8	4359.34	1733.97	-22818	0.526029	-0.27899	1.90104	0.926785
357	484	tr|A0A224Y9K2|A0A224Y9K2_9ACAR	N/A	N/A	Glycine rich superfamily member OS	Rhipicephalus zambeziensis PE	TRUE	9.71486	6.8291e-05	65463.5	19001.1	67656.8	19492.9	7987.52	5262.43	46462.4	3.44526	0.537221	0.290254	-1.78461
358	271	tr|A0A224YCV5|A0A224YCV5_9ACAR	N/A	N/A	Fatty acid-binding protein 7 OS	Rhipicephalus zambeziensis PE	TRUE	9.69927	6.8918e-05	365725	166680	374566	166430	33886.3	23157.5	199045	2.19417	0.341271	0.455753	-1.13368
359	296	tr|A0A131Z7V1|A0A131Z7V1_RHIAP	N/A	N/A	Ribosomal protein OS	Rhipicephalus appendiculatus PE	TRUE	-9.64703	7.1066e-05	267517	369977	263605	365442	13398.6	16482.9	-102459	0.723065	-0.140823	1.383	0.467802
360	597	tr|L7M803|L7M803_9ACAR	N/A	N/A	Putative 4-aminobutyrate aminotransferase OS	Rhipicephalus pulchellus PE	TRUE	-9.64143	7.1301e-05	17098.7	43962.7	16973.3	45113	1326.02	5412.57	-26864.1	0.388935	-0.410123	2.57112	1.3624
361	646	tr|A0A023GKA4|A0A023GKA4_9ACAR	N/A	N/A	Putative ubiquinol cytochrome c reductase subunit qcr2 OS	Amblyomma triste PE	TRUE	-9.64	7.1361e-05	17443.7	78770.9	21790.1	78207.1	11176.7	6080.18	-61327.2	0.221448	-0.654727	4.51572	2.17496
362	256	tr|L7M9V8|L7M9V8_9ACAR	N/A	N/A	Putative proline and glutamine-rich splicing factor sfpq OS	Rhipicephalus pulchellus PE	TRUE	-9.63888	7.1408e-05	133287	158162	134418	159202	3888.88	3393.43	-24874.5	0.842728	-0.0743127	1.18662	0.246862
363	408	tr|A0A131Z6W5|A0A131Z6W5_RHIAP	N/A	N/A	NADH dehydrogenase (Ubiquinone) 1 alpha subcomplex subunit 6 OS	Rhipicephalus appendiculatus PE	TRUE	-9.61851	7.2271e-05	103825	137935	104452	137061	5151.67	4874.99	-34110.2	0.752708	-0.123373	1.32854	0.409838
364	650	tr|Q4U334|Q4U334_DERVA	N/A	N/A	40S ribosomal protein S24 OS	Dermacentor variabilis PE	TRUE	-9.59569	7.3253e-05	54754.4	96720.9	55039.7	99062	2073.96	8497.53	-41966.5	0.566107	-0.247102	1.76645	0.820854
365	204	tr|E2R8Z5|E2R8Z5_CANLF	N/A	N/A	Keratin 5 OS	Canis lupus familiaris GN	TRUE	-9.59332	7.3355e-05	44633.2	84809	43709.3	85484.1	3709.28	7509.68	-40175.9	0.526278	-0.278785	1.90014	0.926102
366	98	tr|A0A224Z8V8|A0A224Z8V8_9ACAR	N/A	N/A	SND1 nuclease domain-containing protein 1 OS	Rhipicephalus zambeziensis PE	TRUE	9.5827	7.3818e-05	430767	310075	426057	310078	12890.6	21641.2	120692	1.38923	0.142775	0.719821	-0.47429
367	326	tr|L7MDL8|L7MDL8_9ACAR	N/A	N/A	Uncharacterized protein (Fragment) OS	Rhipicephalus pulchellus PE	TRUE	9.552	7.5175e-05	186021	107405	187308	110071	8513.32	14088.1	78615.8	1.73196	0.238537	0.577382	-0.792402
368	463	tr|V5I0X4|V5I0X4_IXORI	N/A	N/A	Putative 60s ribosomal protein l23 apis mellifera OS	Ixodes ricinus PE	TRUE	-9.54648	7.5422e-05	248261	330689	247660	323316	1982.08	17154.7	-82428.2	0.750738	-0.124512	1.33202	0.413618
369	447	tr|A0A224YMH7|A0A224YMH7_9ACAR	N/A	N/A	Adenylate kinase OS	Rhipicephalus zambeziensis PE	TRUE	9.47774	7.8578e-05	123261	78066.7	124187	80678.6	5097.78	8060.22	45194.7	1.57892	0.198361	0.633343	-0.658941
370	402	tr|L7LXM2|L7LXM2_9ACAR	N/A	N/A	Uncharacterized protein OS	Rhipicephalus pulchellus PE	TRUE	-9.39543	8.2561e-05	87491.4	111780	87387.7	113334	3168.21	4086.01	-24289	0.782708	-0.1064	1.27762	0.353455
371	476	tr|A0A224YSJ3|A0A224YSJ3_9ACAR	N/A	N/A	Leucine-rich PPR motif-containing protein mitochondrial OS	Rhipicephalus zambeziensis PE	TRUE	9.3799	8.3338e-05	43497.9	28654.9	42720.6	27750	2047.62	2413.22	14843.1	1.51799	0.18127	0.658764	-0.602167
372	66	tr|A0A224YRR9|A0A224YRR9_9ACAR	N/A	N/A	Insulin-like growth factor 2 mRNA-binding protein 1 OS	Rhipicephalus zambeziensis PE	TRUE	-9.34788	8.4968e-05	463114	558757	458574	561561	13818.1	15092.7	-95642.5	0.82883	-0.0815346	1.20652	0.270852
373	805	tr|B7PEW1|B7PEW1_IXOSC	N/A	N/A	Cytochrome b-c1 complex subunit 6 OS	Ixodes scapularis GN	TRUE	-9.31668	8.6591e-05	2322.78	41283.9	2761.38	42319.6	1361.7	8252.14	-38961.1	0.0562636	-1.24977	17.7735	4.15165
374	90	tr|A0A224Z386|A0A224Z386_9ACAR	N/A	N/A	Lamin B OS	Rhipicephalus zambeziensis PE	TRUE	9.2615	8.9551e-05	508665	348536	511129	346869	16109.4	30597.9	160129	1.45943	0.164184	0.685197	-0.545409
375	411	tr|A0A224YMT2|A0A224YMT2_9ACAR	N/A	N/A	F-type H+-transporting ATPase subunit f OS	Rhipicephalus zambeziensis PE	TRUE	9.22846	9.1379e-05	419990	295214	420185	302624	6668.07	26206.6	124776	1.42266	0.153102	0.702907	-0.508595
376	291	tr|L7ME31|L7ME31_9ACAR	N/A	N/A	Putative laminin a (Fragment) OS	Rhipicephalus pulchellus PE	TRUE	9.20978	9.2432e-05	226715	161159	225492	160192	7380.79	12173.2	65555.2	1.40677	0.148224	0.710847	-0.492389
377	316	tr|J9NVC6|J9NVC6_CANLF	N/A	N/A	Immunoglobulin heavy constant mu OS	Canis lupus familiaris GN	TRUE	9.18802	9.3676e-05	175727	37384.3	174642	27900.8	5109.26	29677.2	138343	4.70056	0.67215	0.212741	-2.23283
378	636	tr|A0A224YVX6|A0A224YVX6_9ACAR	N/A	N/A	Trifunctional purine biosynthetic protein adenosine-3 OS	Rhipicephalus zambeziensis PE	TRUE	9.17389	9.4494e-05	70344.1	36074.5	69026.8	35205.8	2852.15	6905.28	34269.6	1.94997	0.290028	0.512829	-0.963451
379	442	tr|A0A224YSE4|A0A224YSE4_9ACAR	N/A	N/A	ATP-dependent 6-phosphofructokinase OS	Rhipicephalus zambeziensis PE	TRUE	9.17328	9.453e-05	62149.9	25231.6	61764.3	22647.3	2691.92	7585.61	36918.3	2.46318	0.391496	0.405979	-1.30052
380	502	tr|L7M6K1|L7M6K1_9ACAR	N/A	N/A	Uncharacterized protein OS	Rhipicephalus pulchellus PE	TRUE	9.06235	0.0001	18406.1	10023.7	18148.2	10548.8	852.894	1641.59	8382.38	1.83626	0.263934	0.544586	-0.876769
381	518	tr|A0A131Z2K7|A0A131Z2K7_RHIAP	N/A	N/A	Lipocalin OS	Rhipicephalus appendiculatus PE	TRUE	-9.04701	0.0001	40815.4	60059.7	41635.1	60344.4	2427.23	3493.9	-19244.2	0.679582	-0.167758	1.47149	0.557281
382	157	tr|L7M8R8|L7M8R8_9ACAR	N/A	N/A	Adenosylhomocysteinase OS	Rhipicephalus pulchellus PE	TRUE	8.91783	0.00011	321808	171329	320548	157339	4263.44	33477.5	150479	1.87831	0.273766	0.532395	-0.909432
383	281	tr|A0A023FJC0|A0A023FJC0_9ACAR	N/A	N/A	Putative fibrillarin (Fragment) OS	Amblyomma cajennense PE	TRUE	-8.99021	0.00011	163660	262617	165292	265078	4992.33	21440.9	-98957.2	0.623189	-0.20538	1.60465	0.682259
384	549	tr|A0A131XG98|A0A131XG98_9ACAR	N/A	N/A	Putative zinc-binding oxidoreductase OS	Hyalomma excavatum PE	TRUE	-8.97872	0.00011	72088	101275	71974.9	100874	3786.38	5284.96	-29186.9	0.711805	-0.147639	1.40488	0.490445
385	728	tr|F1PW98|F1PW98_CANLF	N/A	N/A	Uncharacterized protein OS	Canis lupus familiaris GN	TRUE	-8.95024	0.00011	8984.28	51353	8960.83	52794.8	2574.56	9110.84	-42368.7	0.174951	-0.757083	5.71588	2.51497
386	807	tr|B7P6R8|B7P6R8_IXOSC	N/A	N/A	Secreted inorganic pyrophosphatase, putative (Fragment) OS	Ixodes scapularis GN	TRUE	8.93334	0.00011	57587	27248.2	56811.9	27436.1	4284.06	5270.83	30338.8	2.11342	0.324986	0.473166	-1.07958
387	111	tr|A0A224Z3B4|A0A224Z3B4_9ACAR	N/A	N/A	Malic enzyme OS	Rhipicephalus zambeziensis PE	TRUE	8.85763	0.00012	238054	157995	237710	160929	7275.9	16548	80059.2	1.50672	0.178032	0.663694	-0.591411
388	238	tr|A0A131YYZ5|A0A131YYZ5_RHIAP	N/A	N/A	Adenylyl cyclase-associated protein OS	Rhipicephalus appendiculatus PE	TRUE	8.82465	0.00012	284347	188429	282068	189995	9677.74	19465.5	95917.7	1.50904	0.1787	0.662674	-0.593629
389	347	tr|L7M3K2|L7M3K2_9ACAR	N/A	N/A	60S ribosomal protein L13 OS	Rhipicephalus pulchellus PE	TRUE	-8.73572	0.00012	231398	287222	235335	287633	12409.8	3056.45	-55824	0.805642	-0.0938581	1.24125	0.31179
390	471	tr|L7M6N0|L7M6N0_9ACAR	N/A	N/A	Putative eukaryotic translation initiation factor OS	Rhipicephalus pulchellus PE	TRUE	8.78955	0.00012	85427.7	50483.2	86119.7	51182.3	6307.44	4841.56	34944.5	1.6922	0.228452	0.590946	-0.758901
391	266	tr|A0A131Z5W2|A0A131Z5W2_RHIAP	N/A	N/A	NADH dehydrogenase (Ubiquinone) 1 alpha subcomplex subunit 9 OS	Rhipicephalus appendiculatus PE	TRUE	-8.62644	0.00013	201681	309361	206353	309077	9548.27	23066.8	-107679	0.65193	-0.185799	1.53391	0.617211
392	482	tr|L7LVH9|L7LVH9_9ACAR	N/A	N/A	Histone H3 OS	Rhipicephalus pulchellus PE	TRUE	-8.71489	0.00013	2532.06	20992.1	2924.77	22608.2	1371.42	4008.31	-18460	0.12062	-0.918581	8.29051	3.05146
393	480	tr|A0A131X8H2|A0A131X8H2_9ACAR	N/A	N/A	Peptidylprolyl isomerase OS	Hyalomma excavatum PE	TRUE	8.60523	0.00014	79321.5	36410.5	79977	34586	8328.41	5486.61	42911	2.17853	0.338164	0.459024	-1.12336
394	600	tr|A0A224YNG9|A0A224YNG9_9ACAR	N/A	N/A	Glucose-6-phosphate isomerase OS	Rhipicephalus zambeziensis PE	TRUE	8.5541	0.00014	57785.5	35492.1	56442.2	35343.1	3854.52	3508.71	22293.4	1.62812	0.211687	0.614205	-0.703208
395	87	tr|A0A224YC84|A0A224YC84_9ACAR	N/A	N/A	Adducin OS	Rhipicephalus zambeziensis PE	TRUE	-8.4567	0.00015	472737	673488	464670	683188	30350.6	36509.4	-200751	0.701924	-0.15371	1.42466	0.510614
396	339	tr|A0A224YTK8|A0A224YTK8_9ACAR	N/A	N/A	Mitochondrial 2-oxoglutarate/malate carrier protein OS	Rhipicephalus zambeziensis PE	TRUE	-8.4008	0.00015	134262	167560	135293	165739	3936.4	6881.07	-33298.4	0.801275	-0.0962185	1.24801	0.319631
397	359	tr|C9W1F7|C9W1F7_RHISA	N/A	N/A	F1F0-type ATP synthase subunit G OS	Rhipicephalus sanguineus PE	TRUE	-8.37735	0.00016	324772	358721	323913	360121	3278.59	7412.17	-33948.8	0.905362	-0.0431779	1.10453	0.143434
398	373	tr|A0A131YR43|A0A131YR43_RHIAP	N/A	N/A	Lectin, mannose-binding 1 OS	Rhipicephalus appendiculatus PE	TRUE	-8.34597	0.00016	151973	200269	153122	196778	4195.16	10786.3	-48295.6	0.758846	-0.119846	1.31779	0.39812
399	432	tr|L7M796|L7M796_9ACAR	N/A	N/A	Putative aldehyde dehydrogenase OS	Rhipicephalus pulchellus PE	TRUE	8.34492	0.00016	30719	12812.7	31510.1	12969.1	3463.94	2533.49	17906.3	2.39754	0.379766	0.417094	-1.26156
400	776	tr|A0A1E1XEH7|A0A1E1XEH7_9ACAR	N/A	N/A	Glycerol-3-phosphate dehydrogenase [NAD(+)] OS	Amblyomma aureolatum PE	TRUE	8.32844	0.00016	40006	23020.1	39879.3	22880.4	2028.5	3538.87	16985.9	1.73787	0.240019	0.575415	-0.797324
401	7	tr|Q6X4V4|Q6X4V4_RHIMP	N/A	N/A	Actin OS	Rhipicephalus microplus PE	TRUE	-8.27574	0.00017	26310.7	37633.5	26339.1	38201	1892.37	1976.55	-11322.8	0.699129	-0.155443	1.43035	0.516369
402	15	tr|A0A131YYS7|A0A131YYS7_RHIAP	N/A	N/A	ATP synthase subunit beta OS	Rhipicephalus appendiculatus PE	TRUE	-8.25027	0.00017	2.4274e+06	3.02215e+06	2.45158e+06	3.02413e+06	109445	93857.9	-594756	0.803201	-0.0951757	1.24502	0.316167
403	45	tr|A0A131Z645|A0A131Z645_RHIAP	N/A	N/A	Cubilin (Fragment) OS	Rhipicephalus appendiculatus PE	TRUE	8.26162	0.00017	90609.4	62026.4	90370.8	62354.7	5908.96	3600.42	28582.9	1.46082	0.164596	0.684548	-0.546777
404	320	tr|L7M7H8|L7M7H8_9ACAR	N/A	N/A	Putative glyoxalase OS	Rhipicephalus pulchellus PE	TRUE	8.25542	0.00017	165793	119837	164355	117305	6177.98	9262.13	45955.8	1.38349	0.140975	0.722812	-0.468309
405	375	tr|A0A131XE97|A0A131XE97_9ACAR	N/A	N/A	Glycerol-3-phosphate dehydrogenase [NAD(+)] OS	Hyalomma excavatum PE	TRUE	8.30671	0.00017	83122.5	59207.6	82262	59339.4	3584	4506.58	23914.9	1.40392	0.147341	0.712293	-0.489457
406	385	tr|A0A224YNT5|A0A224YNT5_9ACAR	N/A	N/A	Glyoxylate/hydroxypyruvate reductase OS	Rhipicephalus zambeziensis PE	TRUE	8.26424	0.00017	103842	55393.5	105964	57932.2	5067.32	10573.4	48448.9	1.87463	0.272916	0.533438	-0.906607
407	794	tr|L7M4C6|L7M4C6_9ACAR	N/A	N/A	Putative ca2+-binding protein OS	Rhipicephalus pulchellus PE	TRUE	8.27836	0.00017	22458.7	12504.1	23070.3	12079.6	1498.05	1881.42	9954.65	1.79611	0.254333	0.556758	-0.844878
408	224	tr|L7M7P8|L7M7P8_9ACAR	N/A	N/A	Proteasome subunit alpha type OS	Rhipicephalus pulchellus PE	TRUE	8.1563	0.00018	152956	88389.2	153101	94703.6	6352.49	14502	64566.7	1.73048	0.238167	0.577874	-0.791174
409	421	tr|L7MAD1|L7MAD1_9ACAR	N/A	N/A	Putative pppde peptidase domain protein OS	Rhipicephalus pulchellus PE	TRUE	8.17215	0.00018	125622	71375.6	124857	72630.6	4615.33	12447.8	54246	1.76001	0.245515	0.568179	-0.815582
410	441	tr|A0A224Z1V2|A0A224Z1V2_9ACAR	N/A	N/A	Uncharacterized protein OS	Rhipicephalus zambeziensis PE	TRUE	8.2021	0.00018	63530.5	29633.3	61337.9	29769.4	6666.13	4886.83	33897.2	2.14389	0.331202	0.466442	-1.10023
411	478	tr|A0A224YNP1|A0A224YNP1_9ACAR	N/A	N/A	Glycine rich cell wall structural protein OS	Rhipicephalus zambeziensis PE	TRUE	8.17778	0.00018	185772	144571	185719	146316	6964.72	7281.98	41201.5	1.28499	0.1089	0.778216	-0.361758
412	555	tr|A0A023FWK0|A0A023FWK0_9ACAR	N/A	N/A	Putative ribosomal protein l24 OS	Amblyomma parvum PE	TRUE	-8.2065	0.00018	159875	217965	158475	219972	8205.82	11536.3	-58089.9	0.73349	-0.134606	1.36335	0.447151
413	211	tr|A0A0K8RPZ5|A0A0K8RPZ5_IXORI	N/A	N/A	40S ribosomal protein S8 (Fragment) OS	Ixodes ricinus PE	TRUE	-8.09934	0.00019	493842	633907	493788	636382	13295	31929.4	-140065	0.779045	-0.108438	1.28362	0.360222
414	152	tr|A0A224YPY7|A0A224YPY7_9ACAR	N/A	N/A	2-oxoglutarate dehydrogenase E2 component (Dihydrolipoamide succinyltransferase) OS	Rhipicephalus zambeziensis PE	TRUE	-8.05727	0.0002	57712.7	158149	58866.8	169180	6592.43	24043.2	-100436	0.364926	-0.437795	2.74028	1.45432
415	165	tr|A0A224YJT0|A0A224YJT0_9ACAR	N/A	N/A	Chorion peroxidase like protein OS	Rhipicephalus zambeziensis PE	TRUE	8.0454	0.0002	327814	220028	327559	226574	7465.4	25733.4	107786	1.48987	0.173149	0.671199	-0.575188
416	557	tr|A0A224Z5E7|A0A224Z5E7_9ACAR	N/A	N/A	Pyruvate dehydrogenase E1 component subunit alpha OS	Rhipicephalus zambeziensis PE	TRUE	-7.9941	0.0002	40825.9	65968.3	39810.4	64168	4176.64	4703.47	-25142.4	0.618872	-0.208399	1.61584	0.692287
417	854	tr|A0A131XP13|A0A131XP13_9ACAR	N/A	N/A	Proteasome subunit beta type (Fragment) OS	Hyalomma excavatum PE	TRUE	8.03263	0.0002	329432	269669	326481	273047	12921.7	7378.62	59762.7	1.22161	0.0869343	0.818589	-0.28879
418	65	tr|A0A224Z659|A0A224Z659_9ACAR	N/A	N/A	Phosphoribosylaminoimidazolecarboxamide formyltransferase / IMP cyclohydrolase OS	Rhipicephalus zambeziensis PE	TRUE	7.92362	0.00021	60958.1	27877.3	61390.2	25346.8	3795.58	7437.39	33080.8	2.18665	0.33978	0.45732	-1.12873
419	107	tr|F1PTY1|F1PTY1_CANLF	N/A	N/A	Keratin, type II cytoskeletal 1 OS	Canis lupus familiaris GN	TRUE	-7.93357	0.00021	1.30338e+06	2.66059e+06	1.34765e+06	2.66037e+06	111280	323542	-1.35721e+06	0.489883	-0.309907	2.0413	1.02949
420	21	tr|G3MGQ1|G3MGQ1_9ACAR	N/A	N/A	Tubulin alpha chain (Fragment) OS	Amblyomma maculatum PE	TRUE	-7.88195	0.00022	3.44751e+06	4.22845e+06	3.50052e+06	4.18768e+06	140534	139703	-780937	0.815314	-0.0886753	1.22652	0.294573
421	24	tr|A0A131YS77|A0A131YS77_RHIAP	N/A	N/A	KSR 2 misexpression suppressor OS	Rhipicephalus appendiculatus PE	TRUE	-7.84007	0.00023	1.88115e+06	2.41747e+06	1.85953e+06	2.40495e+06	74338	114858	-536322	0.778147	-0.108938	1.2851	0.361885
422	691	tr|L7MCC0|L7MCC0_9ACAR	N/A	N/A	Putative heat shock protein (Fragment) OS	Rhipicephalus pulchellus PE	TRUE	7.83974	0.00023	19099.8	10736.9	19211	10888.9	514.919	2070.39	8362.9	1.77889	0.25015	0.562148	-0.830979
423	787	tr|V5I2Q5|V5I2Q5_IXORI	N/A	N/A	Putative g-protein alpha subunit (Fragment) OS	Ixodes ricinus PE	TRUE	-7.74783	0.00024	4664.04	18437.9	5076.29	18182.1	1782.43	3076.48	-13773.8	0.25296	-0.596948	3.9532	1.98302
424	798	tr|L7LYM2|L7LYM2_9ACAR	N/A	N/A	Uncharacterized protein OS	Rhipicephalus pulchellus PE	TRUE	7.7587	0.00024	55016	35058.2	54915.8	34466	2276.3	4613.62	19957.8	1.56928	0.195699	0.637237	-0.650099
425	338	tr|A0A131YU69|A0A131YU69_RHIAP	N/A	N/A	Tick thioester protein OS	Rhipicephalus appendiculatus PE	TRUE	7.63586	0.00026	77253.3	22849.9	78064.8	22737	13513.7	4519.51	54403.4	3.3809	0.529033	0.295779	-1.75741
426	571	tr|L7LZM3|L7LZM3_9ACAR	N/A	N/A	Putative cytochrome c OS	Rhipicephalus pulchellus PE	TRUE	7.67421	0.00026	128670	99410.2	130154	99435.3	3915.23	6543.7	29260	1.29434	0.112047	0.772597	-0.372213
427	725	tr|L7MKF4|L7MKF4_9ACAR	N/A	N/A	Phosphoinositide phospholipase C (Fragment) OS	Rhipicephalus pulchellus PE	TRUE	-7.65637	0.00026	1321.85	10637.6	328.611	10713.9	2020.71	1355.88	-9315.71	0.124262	-0.90566	8.04749	3.00854
428	819	tr|A0A131YI91|A0A131YI91_RHIAP	N/A	N/A	Cuticle protein OS	Rhipicephalus appendiculatus PE	TRUE	-7.6759	0.00026	157442	188811	157718	190026	3619.86	7328.1	-31369.1	0.83386	-0.078907	1.19924	0.262123
429	176	tr|A0A224YPB5|A0A224YPB5_9ACAR	N/A	N/A	Heat shock protein OS	Rhipicephalus zambeziensis PE	TRUE	7.60984	0.00027	1.68458e+06	1.46735e+06	1.67343e+06	1.46188e+06	50539.8	26556.9	217232	1.14804	0.0599584	0.871047	-0.199177
430	289	tr|V5HC22|V5HC22_IXORI	N/A	N/A	40S ribosomal protein S6 OS	Ixodes ricinus PE	TRUE	-7.60459	0.00027	112738	166022	113497	169996	8700.81	10985.3	-53283.7	0.679055	-0.168095	1.47263	0.558399
431	335	tr|A0A131XKD7|A0A131XKD7_9ACAR	N/A	N/A	MICOS complex subunit MIC60 OS	Hyalomma excavatum PE	TRUE	7.60276	0.00027	127142	54791.7	127480	60043.9	9900.45	16254.9	72350	2.32046	0.365573	0.43095	-1.21441
432	452	tr|L7LQP4|L7LQP4_9ACAR	N/A	N/A	Putative salivary lipocalin OS	Rhipicephalus pulchellus PE	TRUE	-7.58955	0.00027	323518	2.5469e+06	322431	2.59161e+06	49814.8	583784	-2.22338e+06	0.127024	-0.896114	7.87252	2.97683
433	745	tr|A0A023G079|A0A023G079_9ACAR	N/A	N/A	Putative aicar transformylase/imp cyclohydrolase/methylglyoxal synthase (Fragment) OS	Amblyomma parvum PE	TRUE	7.61172	0.00027	23751.6	15290.6	24337.6	15145.4	1948.85	1069.72	8460.93	1.55334	0.191267	0.643774	-0.635375
434	801	tr|L7LRB1|L7LRB1_9ACAR	N/A	N/A	Putative group ii salivary lipocalin OS	Rhipicephalus pulchellus PE	TRUE	7.59812	0.00027	26700.6	9582.55	26796.8	9534.04	2197.84	3933.47	17118	2.78637	0.445039	0.35889	-1.47839
435	672	tr|L7MMU0|L7MMU0_9ACAR	N/A	N/A	Galectin (Fragment) OS	Rhipicephalus pulchellus PE	TRUE	-7.55338	0.00028	33780.4	49794.9	35414.7	50630	3476.9	2427.28	-16014.4	0.678392	-0.168519	1.47407	0.55981
436	750	tr|A0A131YU14|A0A131YU14_RHIAP	N/A	N/A	Dihydropyrimidinase OS	Rhipicephalus appendiculatus PE	TRUE	7.55537	0.00028	77992.7	60488.7	78687.9	61130	3009.85	3522.84	17504	1.28938	0.11038	0.775568	-0.366674
437	22	tr|A0A224Z9V2|A0A224Z9V2_9ACAR	N/A	N/A	Transitional endoplasmic reticulum ATPase OS	Rhipicephalus zambeziensis PE	TRUE	7.49964	0.00029	484784	402274	484321	401074	15354.3	15760.9	82509.6	1.20511	0.0810259	0.829801	-0.269162
438	167	tr|A0A224YGJ1|A0A224YGJ1_9ACAR	N/A	N/A	Acetyl-CoA acyltransferase OS	Rhipicephalus zambeziensis PE	TRUE	-7.49927	0.00029	705262	949649	727318	960428	56133	33121	-244386	0.742656	-0.129212	1.34652	0.429234
439	257	tr|L7M5X2|L7M5X2_9ACAR	N/A	N/A	Putative ribosomal protein OS	Rhipicephalus pulchellus PE	TRUE	-7.50278	0.00029	453988	623686	454932	615490	9470.76	44233.4	-169697	0.727912	-0.137921	1.37379	0.458164
440	596	tr|A0A023FLK6|A0A023FLK6_9ACAR	N/A	N/A	Putative neural cell adhesion molecule l1 (Fragment) OS	Amblyomma cajennense PE	TRUE	7.50033	0.00029	449670	358535	450927	364614	11530	21392.3	91135.2	1.25419	0.0983625	0.797329	-0.326753
441	303	tr|L7M8A8|L7M8A8_9ACAR	N/A	N/A	Putative chaperonin OS	Rhipicephalus pulchellus PE	TRUE	7.40979	0.00031	121709	85505.2	122060	87220.2	6221.57	7535.22	36203.4	1.42341	0.153329	0.702541	-0.509347
442	69	tr|A0A224Z0H9|A0A224Z0H9_9ACAR	N/A	N/A	RNA-binding protein LARK OS	Rhipicephalus zambeziensis PE	TRUE	7.36079	0.00032	258154	129420	261866	132600	19481.4	29051	128734	1.9947	0.299878	0.501328	-0.996174
443	161	tr|A0A224Y664|A0A224Y664_9ACAR	N/A	N/A	Glycine rich superfamily member (Fragment) OS	Rhipicephalus zambeziensis PE	TRUE	7.33165	0.00033	3.447e+06	2.42971e+06	3.52142e+06	2.45797e+06	230390	154693	1.01729e+06	1.41869	0.151887	0.704877	-0.504556
444	358	tr|L7M116|L7M116_9ACAR	N/A	N/A	Putative calcium/calmodulin-dependent protein kinase ii OS	Rhipicephalus pulchellus PE	TRUE	-7.30778	0.00033	123731	168926	120264	169649	11699.1	4015.34	-45194.9	0.732457	-0.135218	1.36527	0.449184
445	146	tr|A0A224YZF6|A0A224YZF6_9ACAR	N/A	N/A	Glutathione S-transferase OS	Rhipicephalus zambeziensis PE	TRUE	7.29091	0.00034	1.26379e+06	110670	1.40256e+06	107785	316090	11976.5	1.15312e+06	11.4195	1.05765	0.0875698	-3.51342
446	260	tr|L7LX53|L7LX53_9ACAR	N/A	N/A	Putative low-density lipoprotein receptor domain class a OS	Rhipicephalus pulchellus PE	TRUE	-7.29527	0.00034	99902.3	127383	99067.7	124780	3803.5	6503.11	-27480.3	0.78427	-0.105535	1.27507	0.350578
447	279	tr|A0A224Z1P8|A0A224Z1P8_9ACAR	N/A	N/A	Large subunit ribosomal protein L22e OS	Rhipicephalus zambeziensis PE	TRUE	-7.29017	0.00034	352771	429054	357936	428049	17162.8	11975.3	-76283.4	0.822206	-0.0850196	1.21624	0.282429
448	382	tr|A0A224YM81|A0A224YM81_9ACAR	N/A	N/A	Elongation factor 1-delta OS	Rhipicephalus zambeziensis PE	TRUE	7.3035	0.00034	135306	68478.4	135008	71772.7	4630.92	17704.5	66827.7	1.97589	0.295764	0.5061	-0.982506
449	221	tr|A0A224Z1B9|A0A224Z1B9_9ACAR	N/A	N/A	Small subunit ribosomal protein S18e OS	Rhipicephalus zambeziensis PE	TRUE	7.26595	0.00035	520360	405160	512040	409230	28498.9	13903.5	115200	1.28433	0.108677	0.778615	-0.361018
450	485	tr|F1PCE8|F1PCE8_CANLF	N/A	N/A	Uncharacterized protein OS	Canis lupus familiaris GN	TRUE	-7.26254	0.00035	1.38454e+06	1.57036e+06	1.38438e+06	1.58898e+06	24394.7	44982.2	-185817	0.881672	-0.0546928	1.13421	0.181685
451	682	tr|L7M432|L7M432_9ACAR	N/A	N/A	Histone H2A OS	Rhipicephalus pulchellus PE	TRUE	7.26161	0.00035	101820	91693.2	101638	91861.9	1948	1996.33	10127.3	1.11045	0.0454981	0.900538	-0.151141
452	628	tr|A0A224YSG1|A0A224YSG1_9ACAR	N/A	N/A	60S ribosomal protein L6 OS	Rhipicephalus zambeziensis PE	TRUE	-7.20601	0.00036	89593.6	130516	89282.1	133230	2771.11	11014.5	-40922.2	0.686458	-0.163386	1.45675	0.542756
453	318	tr|L7M6I8|L7M6I8_9ACAR	N/A	N/A	Putative ribosomal protein s13 OS	Rhipicephalus pulchellus PE	TRUE	-7.16308	0.00037	220258	256081	217715	255620	7893.82	6142.53	-35823.1	0.860111	-0.0654457	1.16264	0.217406
454	674	tr|L7M7V3|L7M7V3_9ACAR	N/A	N/A	GTP-binding nuclear protein OS	Rhipicephalus pulchellus PE	TRUE	-7.19366	0.00037	63773.7	87147.2	63051.2	86846.6	2912.57	5809.1	-23373.5	0.731793	-0.135612	1.36651	0.450493
455	6	tr|A0A131ZAM9|A0A131ZAM9_RHIAP	N/A	N/A	Twitchin like (Fragment) OS	Rhipicephalus appendiculatus PE	TRUE	7.14794	0.00038	399145	281525	405578	284349	21757.6	24692	117621	1.4178	0.151614	0.705319	-0.503652
456	234	tr|A0A131YZI8|A0A131YZI8_RHIAP	N/A	N/A	Dihydropyrimidinase OS	Rhipicephalus appendiculatus PE	TRUE	7.08996	0.0004	252325	211653	250603	214835	5733.62	9937.79	40672.2	1.19216	0.0763363	0.83881	-0.253584
457	795	tr|L7M444|L7M444_9ACAR	N/A	N/A	Putative secreted protein OS	Rhipicephalus pulchellus PE	TRUE	-7.02521	0.00042	46374.2	57469.6	46295.6	56830.7	626.896	3095.93	-11095.5	0.806933	-0.0931625	1.23926	0.309479
458	739	tr|A0A224YP86|A0A224YP86_9ACAR	N/A	N/A	H/ACA ribonucleoprotein complex subunit OS	Rhipicephalus zambeziensis PE	TRUE	-6.97145	0.00043	23376.2	40683.4	23122	40190.4	1872.81	4598.41	-17307.2	0.574589	-0.240643	1.74037	0.799398
459	110	tr|A0A224Z3G3|A0A224Z3G3_9ACAR	N/A	N/A	V-type H+-transporting ATPase subunit A OS	Rhipicephalus zambeziensis PE	TRUE	-6.9256	0.00045	295996	440288	302320	439468	18284.4	37443.4	-144292	0.672277	-0.172451	1.48748	0.572871
460	664	tr|L7M3T4|L7M3T4_9ACAR	N/A	N/A	Putative cdc42 OS	Rhipicephalus pulchellus PE	TRUE	-6.8224	0.00049	2915.42	12145.5	3347.06	12743.7	1676.32	2124	-9230.08	0.240041	-0.619715	4.16596	2.05865
461	708	tr|L7M4E9|L7M4E9_9ACAR	N/A	N/A	Inositol-1-monophosphatase OS	Rhipicephalus pulchellus PE	TRUE	6.78939	0.0005	22573.5	5916.53	22484.5	4356.42	961.038	4811.72	16656.9	3.81532	0.581531	0.262101	-1.9318
462	688	tr|A0A224Z4P0|A0A224Z4P0_9ACAR	N/A	N/A	Small subunit ribosomal protein S28e OS	Rhipicephalus zambeziensis PE	TRUE	6.70898	0.00053	84487	65154.3	84014.1	65723.3	5031.61	2810.28	19332.7	1.29672	0.112847	0.771175	-0.374869
463	215	tr|L7MAX7|L7MAX7_9ACAR	N/A	N/A	Putative eukaryotic translation initiation factor 4a2 OS	Rhipicephalus pulchellus PE	TRUE	6.68289	0.00054	221430	160776	221403	162008	2878.64	17922.4	60654.3	1.37726	0.139016	0.726079	-0.461801
464	632	tr|L7M1W2|L7M1W2_9ACAR	N/A	N/A	Putative thioredoxin peroxidase strongylocentrotus purpuratus: similar to thioredoxin peroxidase OS	Rhipicephalus pulchellus PE	TRUE	6.69129	0.00054	43124.3	25542.1	42370.7	25037.2	4944.49	1780.29	17582.1	1.68836	0.227465	0.592291	-0.755621
465	119	tr|A0A224YQ72|A0A224YQ72_9ACAR	N/A	N/A	Gelsolin OS	Rhipicephalus zambeziensis PE	TRUE	6.62139	0.00057	83240.8	46213.7	82285.7	43121.4	6854.73	8837.24	37027.1	1.80122	0.255566	0.555181	-0.848971
466	719	tr|A0A131XID5|A0A131XID5_9ACAR	N/A	N/A	Putative chaperonin subunit OS	Hyalomma excavatum PE	TRUE	6.6251	0.00057	29555.3	25831	29711.2	25986.7	844.886	741.764	3724.29	1.14418	0.058494	0.873989	-0.194313
467	825	tr|A0A131Z0H3|A0A131Z0H3_RHIAP	N/A	N/A	Abc transporter OS	Rhipicephalus appendiculatus PE	TRUE	6.59965	0.00058	115935	81136	115958	79963.6	5386.45	9066.31	34799	1.4289	0.155001	0.699841	-0.514901
468	554	tr|A0A1E1X6L6|A0A1E1X6L6_9ACAR	N/A	N/A	Putative dehydrogenase with different specificities related to short-chain alcohol dehydrogenase OS	Amblyomma aureolatum PE	TRUE	6.58558	0.00059	168735	135939	166240	135773	9508.75	2963.26	32795.5	1.24125	0.0938595	0.805639	-0.311794
469	744	tr|A0A131XQY3|A0A131XQY3_9ACAR	N/A	N/A	Putative grp-3 497 glycine rich family OS	Hyalomma excavatum PE	TRUE	-6.43969	0.00066	51083.2	231591	50691.4	232941	54549.8	12929.3	-180508	0.220575	-0.656444	4.53361	2.18066
470	141	tr|A0A224YV05|A0A224YV05_9ACAR	N/A	N/A	Calmodulin OS	Rhipicephalus zambeziensis PE	TRUE	6.42803	0.00067	1.94289e+06	1.7696e+06	1.94368e+06	1.77179e+06	31883.7	43479.7	173291	1.09793	0.0405732	0.910808	-0.134781
471	200	tr|L7M5R1|L7M5R1_9ACAR	N/A	N/A	Proteasome subunit alpha type OS	Rhipicephalus pulchellus PE	TRUE	6.42825	0.00067	139583	88329.4	143219	88344.4	10949.5	11593	51254	1.58026	0.198728	0.632808	-0.660161
472	198	tr|A0A224YKT3|A0A224YKT3_9ACAR	N/A	N/A	D-3-phosphoglycerate dehydrogenase OS	Rhipicephalus zambeziensis PE	TRUE	6.41533	0.00068	425334	289645	430541	278487	14247.8	39829.7	135688	1.46846	0.166864	0.680983	-0.554309
473	315	tr|L7M720|L7M720_9ACAR	N/A	N/A	Putative heat shock protein OS	Rhipicephalus pulchellus PE	TRUE	-6.39048	0.00069	311125	360516	312782	360609	7762.62	13367.2	-49391.1	0.862999	-0.0639897	1.15875	0.212569
474	284	tr|L7LWU5|L7LWU5_9ACAR	N/A	N/A	Putative microtubule associated complex OS	Rhipicephalus pulchellus PE	TRUE	6.34883	0.00072	307845	229233	305608	230159	11612.6	21872.6	78611.6	1.34293	0.128054	0.744639	-0.425387
475	551	tr|A0A131ZCD0|A0A131ZCD0_RHIAP	N/A	N/A	Lipoprotein amino terminal region (Fragment) OS	Rhipicephalus appendiculatus PE	TRUE	-6.34847	0.00072	9429.45	19935.4	9792.51	20588.2	1926.68	2691.16	-10505.9	0.473001	-0.325138	2.11416	1.08009
476	213	tr|A0A224ZBN2|A0A224ZBN2_9ACAR	N/A	N/A	Vigilin OS	Rhipicephalus zambeziensis PE	TRUE	6.32451	0.00073	100945	49887.4	101757	52672.8	4123.4	15610.7	51058.1	2.02347	0.306096	0.494202	-1.01683
477	578	tr|A0A224YCS2|A0A224YCS2_9ACAR	N/A	N/A	Metallopeptidase OS	Rhipicephalus zambeziensis PE	TRUE	6.30727	0.00074	78521.3	39417.4	78254	44128	4210.79	11662.8	39103.9	1.99205	0.299299	0.501996	-0.994251
478	652	tr|A0A224YG77|A0A224YG77_9ACAR	N/A	N/A	26S proteasome regulatory subunit N10 OS	Rhipicephalus zambeziensis PE	TRUE	-6.30738	0.00074	3417.89	8872.37	3363.75	8800.08	986.699	1420.49	-5454.48	0.385228	-0.414282	2.59586	1.37621
479	894	tr|A0A224YKL3|A0A224YKL3_9ACAR	N/A	N/A	Cystathionine gamma-lyase OS	Rhipicephalus zambeziensis PE	TRUE	6.29594	0.00075	35996.1	7045.97	35892.4	2891.6	1175.35	9121.01	28950.1	5.10875	0.708314	0.195743	-2.35297
480	138	tr|A0A224Z329|A0A224Z329_9ACAR	N/A	N/A	Ubiquitin-activating enzyme E1 OS	Rhipicephalus zambeziensis PE	TRUE	6.27981	0.00076	96475.5	61699.9	96262.2	65638.4	5919.34	9360.83	34775.6	1.56363	0.194133	0.639539	-0.644895
481	191	tr|L7M8D5|L7M8D5_9ACAR	N/A	N/A	Putative aldehyde dehydrogenase OS	Rhipicephalus pulchellus PE	TRUE	6.26372	0.00077	315993	228149	314545	222169	6173.71	27360.8	87844.7	1.38503	0.14146	0.722005	-0.46992
482	218	tr|A0A224YKA5|A0A224YKA5_9ACAR	N/A	N/A	Uncharacterized protein OS	Rhipicephalus zambeziensis PE	TRUE	6.26128	0.00077	638610	584933	640042	590622	8369.95	14963.7	53676.4	1.09177	0.0381292	0.915948	-0.126662
483	532	tr|A0A023G113|A0A023G113_9ACAR	N/A	N/A	Putative cysteine proteinase ixodes scapularis cysteine proteinase (Fragment) OS	Amblyomma parvum PE	TRUE	-6.26584	0.00077	294640	485879	292009	485225	10072.6	60204.8	-191238	0.606407	-0.217236	1.64906	0.721641
484	898	tr|B7PV15|B7PV15_IXOSC	N/A	N/A	Glyoxylate/hydroxypyruvate reductase, putative OS	Ixodes scapularis GN	TRUE	6.22785	0.00079	114130	88519.4	113779	87896.1	6954.69	4390.38	25610.6	1.28932	0.110361	0.775601	-0.366613
485	206	tr|A0A023G5Y4|A0A023G5Y4_9ACAR	N/A	N/A	Putative neural cell adhesion molecule l1 (Fragment) OS	Amblyomma triste PE	TRUE	6.14447	0.00085	98687.7	65676.1	97299	62811.4	5118.78	9447.56	33011.6	1.50264	0.176856	0.665494	-0.587502
486	40	tr|A0A224YJV6|A0A224YJV6_9ACAR	N/A	N/A	Clathrin heavy chain OS	Rhipicephalus zambeziensis PE	TRUE	-6.1262	0.00086	112950	150417	112230	149215	8196.63	9079.06	-37466.8	0.750913	-0.12441	1.33171	0.413282
487	329	tr|L7LZX8|L7LZX8_9ACAR	N/A	N/A	Putative alanine aminotransferase OS	Rhipicephalus pulchellus PE	TRUE	6.123	0.00087	88074.8	67746.8	87662.6	69319.5	5563.88	3623.68	20327.9	1.30006	0.113963	0.769197	-0.378575
488	880	tr|L7M3Z4|L7M3Z4_9ACAR	N/A	N/A	Uncharacterized protein OS	Rhipicephalus pulchellus PE	TRUE	6.11725	0.00087	88418.4	67780.4	87386	66013.7	4671.14	4869.19	20638	1.30448	0.115439	0.766587	-0.383479
489	705	tr|L7LYX3|L7LYX3_9ACAR	N/A	N/A	Putative vesicle coat complex copii subunit sec23 OS	Rhipicephalus pulchellus PE	TRUE	6.104	0.00088	16917.5	13768.2	16684.1	13664.8	676.25	779.41	3149.32	1.22874	0.0894597	0.813842	-0.297179
490	514	tr|A0A131YW86|A0A131YW86_RHIAP	N/A	N/A	Fasciclin domain containing protein OS	Rhipicephalus appendiculatus PE	TRUE	-6.0708	0.00091	71948.6	121974	77758.5	122206	15638.2	5202.08	-50025.6	0.589867	-0.229246	1.6953	0.761538
491	623	tr|A0A224YJ26|A0A224YJ26_9ACAR	N/A	N/A	Phospholipase A2 OS	Rhipicephalus zambeziensis PE	TRUE	6.05431	0.00092	89708.2	70350.9	89906.5	70765.3	2972.86	5661.48	19357.3	1.27515	0.105562	0.784219	-0.350671
492	398	tr|A0A224Y3V0|A0A224Y3V0_9ACAR	N/A	N/A	Glycine rich superfamily member OS	Rhipicephalus zambeziensis PE	TRUE	-6.03857	0.00093	20905.8	60265.3	20220.9	55620.7	6831.09	11102.9	-39359.5	0.346896	-0.459801	2.88271	1.52742
493	159	tr|A0A224Z257|A0A224Z257_9ACAR	N/A	N/A	Succinate dehydrogenase [ubiquinone] iron-sulfur subunit, mitochondrial OS	Rhipicephalus zambeziensis PE	TRUE	-6.0293	0.00094	283562	477636	289139	497013	40175.4	50302.2	-194073	0.593679	-0.226448	1.68441	0.752245
494	354	tr|A0A131YDG8|A0A131YDG8_RHIAP	N/A	N/A	Cuticular protein OS	Rhipicephalus appendiculatus PE	TRUE	-6.00951	0.00096	261082	295644	262318	296928	7489.08	8730.3	-34561.8	0.883097	-0.0539917	1.13238	0.179357
495	692	tr|L7M4S5|L7M4S5_9ACAR	N/A	N/A	Proteasome subunit alpha type OS	Rhipicephalus pulchellus PE	TRUE	5.96463	0.00099	77636.1	55789	79535.7	56708.3	4609.55	5693.49	21847.1	1.3916	0.143515	0.718596	-0.476748
496	515	tr|L7M4U7|L7M4U7_9ACAR	N/A	N/A	Eukaryotic translation initiation factor 3 subunit F OS	Rhipicephalus pulchellus PE	TRUE	-5.9453	0.00101	81364	116652	81207.4	119029	1328.31	11796.2	-35287.6	0.697496	-0.156458	1.4337	0.519743
497	106	tr|A0A224Z6S5|A0A224Z6S5_9ACAR	N/A	N/A	40S ribosomal protein S3a OS	Rhipicephalus zambeziensis PE	TRUE	-5.90253	0.00105	497585	591524	498826	598320	24921.4	19801.1	-93939.2	0.841191	-0.0751052	1.18879	0.249494
498	341	tr|C9W1P7|C9W1P7_RHISA	N/A	N/A	ATP synthase H+ transporting mitochondrial F1 complex delta subunit OS	Rhipicephalus sanguineus PE	TRUE	5.8297	0.00112	206072	172033	205911	177171	811.442	11649.5	34038.7	1.19786	0.0784066	0.834821	-0.260461
499	606	tr|L7M5T3|L7M5T3_9ACAR	N/A	N/A	Proteasome subunit alpha type OS	Rhipicephalus pulchellus PE	TRUE	5.82068	0.00113	105188	83992.3	102967	83654.6	6733.45	2774.99	21195.6	1.25235	0.0977262	0.798498	-0.324639
500	701	tr|L7MHC5|L7MHC5_9ACAR	N/A	N/A	Putative glutamine synthetase (Fragment) OS	Rhipicephalus pulchellus PE	TRUE	5.81042	0.00114	62465.3	50028.4	62966	50983.1	3093.76	2958.81	12436.9	1.2486	0.0964218	0.8009	-0.320306
501	343	tr|A0A224YMM2|A0A224YMM2_9ACAR	N/A	N/A	Cytochrome b5 OS	Rhipicephalus zambeziensis PE	TRUE	-5.80218	0.00115	177072	244051	176102	243994	14113.1	18271.7	-66979.1	0.725553	-0.139331	1.37826	0.462847
502	228	tr|A0A131YX76|A0A131YX76_RHIAP	N/A	N/A	Cysteine proteinase OS	Rhipicephalus appendiculatus PE	TRUE	-5.74159	0.00121	303528	380231	296296	381408	18034.8	19713.2	-76702.5	0.798274	-0.0978482	1.2527	0.325045
503	509	tr|B7PA50|B7PA50_IXOSC	N/A	N/A	Cuticular protein, putative OS	Ixodes scapularis GN	TRUE	5.67642	0.00129	1.28272e+06	518237	1.28406e+06	516020	33965.8	267205	764487	2.47517	0.393605	0.404013	-1.30753
504	68	tr|A0A224YSP8|A0A224YSP8_9ACAR	N/A	N/A	LIM domain-containing protein OS	Rhipicephalus zambeziensis PE	TRUE	-5.65069	0.00132	372639	2.47476e+06	355334	2.82913e+06	55192.7	741973	-2.10212e+06	0.150576	-0.822244	6.64117	2.73144
505	71	tr|L7LTQ8|L7LTQ8_9ACAR	N/A	N/A	Putative heteroproteinous nuclear ribonucleoprotein at 87f OS	Rhipicephalus pulchellus PE	TRUE	-5.63784	0.00133	2.26275e+06	2.87853e+06	2.1834e+06	2.85755e+06	181733	121207	-615779	0.786079	-0.104534	1.27214	0.347254
506	667	tr|L7M6S3|L7M6S3_9ACAR	N/A	N/A	Putative bifunctional atp sulfurylase/adenosine 5'-phosphosulfate kinase OS	Rhipicephalus pulchellus PE	TRUE	5.6371	0.00133	16880	9733.62	16664.9	9214.95	1348.65	2147.07	7146.43	1.7342	0.239099	0.576635	-0.79427
507	759	tr|A0A034WZ83|A0A034WZ83_RHIMP	N/A	N/A	Secreted protein 28 (Fragment) OS	Rhipicephalus microplus PE	TRUE	-5.57911	0.00141	122233	135351	121593	136109	3092.9	3542.22	-13117.8	0.903083	-0.0442725	1.10732	0.14707
508	205	tr|A0A131XPK1|A0A131XPK1_9ACAR	N/A	N/A	Putative actin-binding cytoskeleton protein filamin (Fragment) OS	Hyalomma excavatum PE	TRUE	5.55974	0.00143	696592	456848	696986	494742	7233.22	85939.2	239745	1.52478	0.183207	0.655832	-0.608601
509	103	tr|A0A224YLL0|A0A224YLL0_9ACAR	N/A	N/A	2-oxoglutarate dehydrogenase E1 component OS	Rhipicephalus zambeziensis PE	TRUE	-5.5515	0.00144	166904	221289	168935	220003	6638.21	18434.2	-54385.4	0.754234	-0.122494	1.32585	0.406916
510	346	tr|A0A224ZAU9|A0A224ZAU9_9ACAR	N/A	N/A	Troponin I protein OS	Rhipicephalus zambeziensis PE	TRUE	5.52644	0.00148	122069	103735	122292	102178	2959.62	5938.27	18333.8	1.17674	0.0706795	0.849807	-0.234792
511	757	tr|A0A1E1XN62|A0A1E1XN62_9ACAR	N/A	N/A	Putative actin-2 (Fragment) OS	Amblyomma sculptum PE	TRUE	5.51983	0.00149	4.17663e+06	3.43257e+06	4.24741e+06	3.43803e+06	268959	18512.4	744061	1.21677	0.0852067	0.821851	-0.283051
512	392	tr|L7M4Q4|L7M4Q4_9ACAR	N/A	N/A	60S ribosomal protein L18a OS	Rhipicephalus pulchellus PE	TRUE	-5.50326	0.00151	339774	393634	340395	391136	4455.98	19059.8	-53859.8	0.863173	-0.0639023	1.15852	0.212279
513	840	tr|L7M2B5|L7M2B5_9ACAR	N/A	N/A	Proteasome subunit alpha type OS	Rhipicephalus pulchellus PE	TRUE	5.49304	0.00152	85444.4	62370.2	87553	62318.2	8276.44	1442.81	23074.2	1.36996	0.136707	0.729951	-0.454129
514	302	tr|L7M6A6|L7M6A6_9ACAR	N/A	N/A	Profilin OS	Rhipicephalus pulchellus PE	TRUE	-5.45092	0.00159	294960	349867	298440	353068	14984.2	13465.7	-54906.6	0.843064	-0.0741392	1.18615	0.246285
515	76	tr|A0A224Z3B3|A0A224Z3B3_9ACAR	N/A	N/A	V-type H+-transporting ATPase subunit B OS	Rhipicephalus zambeziensis PE	TRUE	-5.39437	0.00167	18682.6	52269.6	18622.4	52180	411.447	12445.8	-33587	0.357428	-0.446812	2.79777	1.48428
516	94	tr|A0A023FX57|A0A023FX57_9ACAR	N/A	N/A	Annexin (Fragment) OS	Amblyomma parvum PE	TRUE	5.37692	0.0017	159402	96465.5	160786	87636.2	4094.93	23048.8	62936.2	1.65242	0.218121	0.605172	-0.724582
517	862	tr|A0A131YZ91|A0A131YZ91_RHIAP	N/A	N/A	Molybdopterin cofactor sulfurase OS	Rhipicephalus appendiculatus PE	TRUE	5.33342	0.00177	20254	6782.91	20386.7	7620.13	2296.86	4499.22	13471.1	2.98604	0.475095	0.334892	-1.57823
518	528	tr|A0A224YB96|A0A224YB96_9ACAR	N/A	N/A	Lipocalin OS	Rhipicephalus zambeziensis PE	TRUE	5.32978	0.00178	58630.4	42122.2	58226.4	41980.2	2514.08	5661.59	16508.2	1.39191	0.143611	0.718437	-0.477067
519	350	tr|A0A131XNG6|A0A131XNG6_9ACAR	N/A	N/A	Glyceraldehyde-3-phosphate dehydrogenase OS	Hyalomma excavatum PE	TRUE	5.2809	0.00186	153010	80050.5	153662	81633.7	4024.94	27336.8	72959.6	1.91142	0.281356	0.523171	-0.934644
520	319	tr|L7M8B5|L7M8B5_9ACAR	N/A	N/A	Putative spliceosome rna helicase ddx39b OS	Rhipicephalus pulchellus PE	TRUE	5.2748	0.00187	118418	83122.5	121101	84458	8761.28	10116.2	35295.7	1.42462	0.1537	0.70194	-0.51058
521	425	tr|A0A224YU18|A0A224YU18_9ACAR	N/A	N/A	Crystallin alpha B OS	Rhipicephalus zambeziensis PE	TRUE	-5.27029	0.00188	65435.5	96002.1	67358.1	94303.4	6053.29	9894.83	-30566.6	0.681605	-0.166467	1.46713	0.552992
522	903	tr|V5HZ17|V5HZ17_IXORI	N/A	N/A	Putative bent (Fragment) OS	Ixodes ricinus PE	TRUE	5.23978	0.00194	14881.7	7945.63	15095.3	8467.8	445.935	2609.64	6936.08	1.87294	0.272524	0.533919	-0.905306
523	89	tr|A0A131XI81|A0A131XI81_9ACAR	N/A	N/A	Aspartate aminotransferase OS	Hyalomma excavatum PE	TRUE	5.20646	0.002	753069	670186	752892	666305	9135	30499.7	82882.6	1.12367	0.0506391	0.88994	-0.16822
524	663	tr|A0A224YPN9|A0A224YPN9_9ACAR	N/A	N/A	Carbonyl reductase 1 OS	Rhipicephalus zambeziensis PE	TRUE	5.18594	0.00204	23951.8	9901.88	23713.4	11557.3	1714.28	5140.13	14049.9	2.41891	0.38362	0.413409	-1.27436
525	808	tr|A0A224Z9U1|A0A224Z9U1_9ACAR	N/A	N/A	Thymus specific serine protease OS	Rhipicephalus zambeziensis PE	TRUE	5.15705	0.0021	60263.9	48237.2	59019.5	48156.8	2678.93	3818.09	12026.7	1.24932	0.096675	0.800433	-0.321147
526	816	tr|A0A1E1WXN0|A0A1E1WXN0_9ACAR	N/A	N/A	Uncharacterized protein (Fragment) OS	Amblyomma aureolatum PE	TRUE	-5.14179	0.00213	18687.8	27264.5	18871.6	26428.1	2031.89	2645.89	-8576.67	0.685427	-0.164039	1.45894	0.544925
527	522	tr|A0A224YEB4|A0A224YEB4_9ACAR	N/A	N/A	Glycine rich superfamily member (Fragment) OS	Rhipicephalus zambeziensis PE	TRUE	5.11721	0.00218	116899	34125.5	117967	35596.6	3723.68	32136	82773.7	3.42557	0.534732	0.291923	-1.77634
528	661	tr|L7MAM7|L7MAM7_9ACAR	N/A	N/A	Putative programmed cell death 4 OS	Rhipicephalus pulchellus PE	TRUE	-5.09305	0.00224	7482.56	12615.3	7437.07	12629.7	1437.49	1412.85	-5132.7	0.593136	-0.226846	1.68595	0.753566
529	369	tr|A0A131Z103|A0A131Z103_RHIAP	N/A	N/A	Uncharacterized protein OS	Rhipicephalus appendiculatus PE	TRUE	5.02229	0.0024	139934	109014	139287	109428	1931.4	12160.7	30920.1	1.28364	0.108442	0.779037	-0.360236
530	873	tr|A0A023FQ51|A0A023FQ51_9ACAR	N/A	N/A	Transgelin (Fragment) OS	Amblyomma cajennense PE	TRUE	5.01972	0.0024	53725.9	26131.3	53899.5	26047.2	1226.82	10925.8	27594.6	2.056	0.313023	0.486381	-1.03984
531	581	tr|A0A224ZAI3|A0A224ZAI3_9ACAR	N/A	N/A	Transforming growth factor-beta-induced protein OS	Rhipicephalus zambeziensis PE	TRUE	4.96853	0.00253	32581.3	22033.3	31788.8	22228.6	2216.41	3621.54	10548.1	1.47873	0.16989	0.676255	-0.564361
532	881	tr|J9P5C8|J9P5C8_CANLF	N/A	N/A	Uncharacterized protein OS	Canis lupus familiaris PE	TRUE	4.95606	0.00256	28118.6	7584	30707.4	7973.1	7969.97	2269.04	20534.6	3.70763	0.569096	0.269714	-1.8905
533	360	tr|L7MEN3|L7MEN3_9ACAR	N/A	N/A	Putative glycine rich protein (Fragment) OS	Rhipicephalus pulchellus PE	TRUE	4.95012	0.00258	1.86658e+07	1.08155e+07	1.88549e+07	1.10333e+07	1.96106e+06	2.49287e+06	7.85034e+06	1.72584	0.237001	0.579427	-0.787301
534	497	tr|G3MMA7|G3MMA7_9ACAR	N/A	N/A	Uncharacterized protein OS	Amblyomma maculatum PE	TRUE	-4.92825	0.00263	27303	33919.3	26854.8	34302.3	1844.39	1951.3	-6616.23	0.804942	-0.0942355	1.24233	0.313044
535	322	tr|A0A224Z865|A0A224Z865_9ACAR	N/A	N/A	RNA-binding protein Musashi OS	Rhipicephalus zambeziensis PE	TRUE	4.8848	0.00275	132345	88090.1	134651	87987	17928.2	2624.48	44254.5	1.50238	0.176779	0.665612	-0.587247
536	431	tr|G3MQM7|G3MQM7_9ACAR	N/A	N/A	Uncharacterized protein OS	Amblyomma maculatum PE	TRUE	-4.85833	0.00283	26485.4	38523.2	25507.2	38713.4	3881.31	3081.01	-12037.8	0.687519	-0.162715	1.45451	0.540529
537	593	tr|C9W1Q2|C9W1Q2_RHISA	N/A	N/A	Protein disulfide isomerase OS	Rhipicephalus sanguineus PE	TRUE	4.82587	0.00292	71564.2	43474.5	71269.7	38971.4	2992.47	11250.1	28089.6	1.64612	0.216461	0.60749	-0.719067
538	255	tr|A0A224YGE4|A0A224YGE4_9ACAR	N/A	N/A	60s ribosomal protein l7a OS	Rhipicephalus zambeziensis PE	TRUE	-4.81772	0.00295	198313	297849	200619	308804	28234.2	30170.5	-99536.5	0.665816	-0.176646	1.50192	0.586805
539	304	tr|L7M7U4|L7M7U4_9ACAR	N/A	N/A	Proteasome subunit alpha type OS	Rhipicephalus pulchellus PE	TRUE	4.78343	0.00305	225068	165223	224244	172126	5233.72	24468.6	59845.6	1.36221	0.134244	0.734101	-0.44595
540	677	tr|L7M2W4|L7M2W4_9ACAR	N/A	N/A	Putative copper chaperone atox1 copper chaperone atox1 OS	Rhipicephalus pulchellus PE	TRUE	4.77618	0.00307	26911.9	21000.9	27132.3	20864.8	1392.87	2046.08	5910.95	1.28146	0.107706	0.780359	-0.35779
541	16	tr|A0A224Z539|A0A224Z539_9ACAR	N/A	N/A	Neurexin iii alpha (Fragment) OS	Rhipicephalus zambeziensis PE	TRUE	4.76781	0.0031	359731	273482	360816	272186	29130.8	21456.2	86249.1	1.31537	0.119049	0.76024	-0.395473
542	394	tr|A0A131XKX7|A0A131XKX7_9ACAR	N/A	N/A	Putative aconitase/aconitase aconitase superfamily OS	Hyalomma excavatum PE	TRUE	-4.76784	0.0031	31130.6	42445.3	30627.6	43243	2284.53	4160.28	-11314.7	0.733428	-0.134642	1.36346	0.447272
543	261	tr|L7M716|L7M716_9ACAR	N/A	N/A	Putative ribosomal protein s9 OS	Rhipicephalus pulchellus PE	TRUE	-4.7662	0.00311	668912	843532	665552	874466	12754.3	72155.6	-174620	0.79299	-0.100732	1.26105	0.334626
544	731	tr|L7M8D2|L7M8D2_9ACAR	N/A	N/A	Putative reticulocalbin calumenin dna supercoiling factor OS	Rhipicephalus pulchellus PE	TRUE	4.73551	0.00321	15727.2	10015.4	16376.1	10225.7	1892.78	1495.59	5711.83	1.57031	0.195984	0.636819	-0.651046
545	706	tr|A0A224YYL9|A0A224YYL9_9ACAR	N/A	N/A	Heat shock 70 kDa protein OS	Rhipicephalus zambeziensis PE	TRUE	4.71955	0.00326	71385	47069.3	67747.9	47731.5	9691.49	3500.26	24315.7	1.51659	0.180869	0.659373	-0.600834
546	472	tr|A0A224Y7G2|A0A224Y7G2_9ACAR	N/A	N/A	MICOS complex subunit OS	Rhipicephalus zambeziensis PE	TRUE	-4.71123	0.00329	23024	40224.6	23725.8	39785.6	3109.29	6606.85	-17200.5	0.572388	-0.24231	1.74707	0.804936
547	552	tr|A0A224ZAJ8|A0A224ZAJ8_9ACAR	N/A	N/A	Transaldolase OS	Rhipicephalus zambeziensis PE	TRUE	4.70093	0.00332	34466.1	23773	33435	23609.4	4304.84	1471.37	10693.1	1.4498	0.161308	0.689751	-0.535853
548	493	tr|A0A131XI55|A0A131XI55_9ACAR	N/A	N/A	Putative f0f1-type atp synthase gamma subunit OS	Hyalomma excavatum PE	TRUE	-4.68811	0.00337	201967	232391	202231	234393	6352.74	11318.1	-30423.7	0.869084	-0.0609384	1.15064	0.202433
549	699	tr|L7M5Q1|L7M5Q1_9ACAR	N/A	N/A	Putative e3 ubiquitin ligase OS	Rhipicephalus pulchellus PE	TRUE	4.68164	0.00339	43415.6	22826.9	42809.3	20935.1	7003.63	5320.74	20588.7	1.90195	0.279199	0.525776	-0.92748
550	285	tr|L7MKN4|L7MKN4_9ACAR	N/A	N/A	Putative hydroxysteroid dehydrogenase-like protein 2 (Fragment) OS	Rhipicephalus pulchellus PE	TRUE	4.67003	0.00343	122253	94747.6	125403	96357.2	10787.9	4730.88	27505.6	1.2903	0.110692	0.775011	-0.367711
551	356	tr|A0A023FG92|A0A023FG92_9ACAR	N/A	N/A	Uncharacterized protein OS	Amblyomma cajennense PE	TRUE	4.65201	0.0035	146154	92086.8	145767	98581.7	12291.3	19729.3	54067.7	1.58714	0.200615	0.630065	-0.666428
552	273	tr|Q6WNW9|Q6WNW9_RHISA	N/A	N/A	Ferritin OS	Rhipicephalus sanguineus GN	TRUE	4.63613	0.00355	155830	138156	155201	136857	4553.9	6115.35	17674.5	1.12793	0.0522827	0.886579	-0.173679
553	263	tr|A0A224Z685|A0A224Z685_9ACAR	N/A	N/A	Polyadenylate-binding protein OS	Rhipicephalus zambeziensis PE	TRUE	4.62153	0.00361	119291	99422.7	120369	98139.2	4705.9	7196.22	19868.7	1.19984	0.0791235	0.833444	-0.262843
554	575	tr|L7M1V2|L7M1V2_9ACAR	N/A	N/A	Putative isovaleryl coenzyme a dehydrogenase OS	Rhipicephalus pulchellus PE	TRUE	4.5847	0.00375	26510.1	18431.9	26531.3	17701.8	2331.71	2642.27	8078.22	1.43827	0.157841	0.695278	-0.524338
555	325	tr|A0A224YZD3|A0A224YZD3_9ACAR	N/A	N/A	Small subunit ribosomal protein S19e OS	Rhipicephalus zambeziensis PE	TRUE	4.58115	0.00377	94601.5	65059.5	92679.3	66022.2	6011.74	11410.4	29542	1.45408	0.162587	0.687722	-0.540103
556	790	tr|L7MJF6|L7MJF6_9ACAR	N/A	N/A	GrpE protein homolog (Fragment) OS	Rhipicephalus pulchellus PE	TRUE	4.54777	0.0039	6620.95	4030.9	6835.64	3882.09	776.781	833.083	2590.05	1.64255	0.215518	0.60881	-0.715935
557	97	tr|V5HMU2|V5HMU2_IXORI	N/A	N/A	Putative 14-3-3 logues OS	Ixodes ricinus PE	TRUE	-4.53739	0.00394	1.02149e+06	1.09018e+06	1.01949e+06	1.0914e+06	6488.2	29573.1	-68688.2	0.936994	-0.0282634	1.06724	0.093889
558	129	tr|A0A131YXB1|A0A131YXB1_RHIAP	N/A	N/A	ATP-dependent RNA helicase DDX3X OS	Rhipicephalus appendiculatus PE	TRUE	-4.49363	0.00413	129773	190760	136260	192810	20823.1	17411.9	-60986.7	0.680295	-0.167302	1.46995	0.555767
559	587	tr|L7M7W1|L7M7W1_9ACAR	N/A	N/A	Coatomer subunit delta OS	Rhipicephalus pulchellus PE	TRUE	4.45488	0.00431	63746	56124.5	63800.5	55509.1	983.315	3277.31	7621.52	1.1358	0.0553006	0.880439	-0.183705
560	712	tr|F0JAD9|F0JAD9_AMBVA	N/A	N/A	Cytochrome b-c1 complex subunit 7 OS	Amblyomma variegatum PE	TRUE	-4.385	0.00464	109475	140902	103777	140736	13459.6	4930.04	-31427.4	0.776956	-0.109604	1.28707	0.364096
561	607	tr|A0A131Z060|A0A131Z060_RHIAP	N/A	N/A	Superoxide dismutase OS	Rhipicephalus appendiculatus PE	TRUE	4.38398	0.00465	185653	112282	186580	120511	3603.37	33277.8	73371	1.65345	0.218391	0.604796	-0.725481
562	850	tr|V5HUX3|V5HUX3_IXORI	N/A	N/A	Putative 60s ribosomal protein l38 OS	Ixodes ricinus PE	TRUE	-4.38235	0.00466	137572	157523	136154	158945	5425.52	7311.87	-19950.5	0.873348	-0.0588125	1.14502	0.195371
563	777	tr|A0A023GF67|A0A023GF67_9ACAR	N/A	N/A	Ubiquitin carboxyl-terminal hydrolase OS	Amblyomma triste PE	TRUE	4.35469	0.0048	20880.7	8980.69	21047.6	10821.9	794.709	5407.31	11900.1	2.32507	0.366436	0.430094	-1.21728
564	802	tr|G3MH64|G3MH64_9ACAR	N/A	N/A	Uncharacterized protein (Fragment) OS	Amblyomma maculatum PE	TRUE	4.34174	0.00487	32886.8	26104.1	32012.6	25810.6	2156.69	2260.63	6782.63	1.25983	0.100312	0.793758	-0.333229
565	506	tr|L7M384|L7M384_9ACAR	N/A	N/A	Putative biotinidase and vanin OS	Rhipicephalus pulchellus PE	TRUE	4.33315	0.00491	71647.3	62144.4	70773.9	61023.2	1862.98	3970.82	9502.88	1.15292	0.0617977	0.867366	-0.205288
566	830	tr|A0A224YJB0|A0A224YJB0_9ACAR	N/A	N/A	Uncharacterized protein OS	Rhipicephalus zambeziensis PE	TRUE	4.32705	0.00494	23614	12737.4	23755.9	14074.2	2101.2	4567.07	10876.6	1.8539	0.268087	0.539402	-0.890567
567	450	tr|A0A224YTE8|A0A224YTE8_9ACAR	N/A	N/A	Methylmalonate-semialdehyde dehydrogenase OS	Rhipicephalus zambeziensis PE	TRUE	4.32227	0.00497	100820	71886.3	102546	74717.7	4875.5	12469	28934	1.4025	0.146902	0.713014	-0.487998
568	729	tr|A0A131YYA7|A0A131YYA7_RHIAP	N/A	N/A	Leucyl-tRNA synthetase OS	Rhipicephalus appendiculatus PE	TRUE	4.2638	0.0053	21687	5409.73	21924.5	2212.09	1657.75	7452.96	16277.3	4.00889	0.603024	0.249446	-2.0032
569	434	tr|L7M6B8|L7M6B8_9ACAR	N/A	N/A	Putative 26s proteasome regulatory complex subunit rpn11 OS	Rhipicephalus pulchellus PE	TRUE	-4.24124	0.00543	30350.8	49889	33453.5	49589.4	8110.72	4370.78	-19538.2	0.608366	-0.215835	1.64375	0.716988
570	627	tr|A0A131XPC6|A0A131XPC6_9ACAR	N/A	N/A	Galectin OS	Hyalomma excavatum PE	TRUE	-4.22545	0.00553	211263	232590	211448	233642	3691.28	9395.62	-21327.4	0.908305	-0.0417683	1.10095	0.138751
571	737	tr|G3MIA7|G3MIA7_9ACAR	N/A	N/A	Uncharacterized protein (Fragment) OS	Amblyomma maculatum PE	TRUE	4.21636	0.00558	7288.1	2116.92	6940.77	2245.16	2326.48	777.372	5171.18	3.44279	0.53691	0.290462	-1.78358
572	41	tr|A0A131Z0E6|A0A131Z0E6_RHIAP	N/A	N/A	Aconitate hydratase, mitochondrial OS	Rhipicephalus appendiculatus PE	TRUE	-4.21248	0.00561	44841.9	60059.3	45089.4	61703.1	5671.74	4475.56	-15217.4	0.746627	-0.126896	1.33936	0.42154
573	516	tr|A0A1E1XVS1|A0A1E1XVS1_9ACAR	N/A	N/A	Putative muscle m-line assembly protein unc-89 (Fragment) OS	Amblyomma sculptum PE	TRUE	4.20831	0.00563	76528.4	55074.1	77227.5	54874.2	3197.64	9681.8	21454.3	1.38955	0.142876	0.719655	-0.474622
574	504	tr|L7M4S4|L7M4S4_9ACAR	N/A	N/A	Putative secreted protein OS	Rhipicephalus pulchellus PE	TRUE	4.20271	0.00567	432983	368464	434142	361228	22816.8	20545.1	64519	1.1751	0.0700759	0.850989	-0.232787
575	399	tr|A0A224Z7X3|A0A224Z7X3_9ACAR	N/A	N/A	Vesicle fusing atpase 2 OS	Rhipicephalus zambeziensis PE	TRUE	-4.1867	0.00577	12784.5	51331.7	10004.1	56494.3	11436.4	14432.2	-38547.2	0.249056	-0.603703	4.01516	2.00546
576	538	tr|A0A131Z420|A0A131Z420_RHIAP	N/A	N/A	Glutathione S-transferase OS	Rhipicephalus appendiculatus PE	TRUE	4.17703	0.00583	56037.6	30475.9	54736	32914.8	4103.86	11530.6	25561.7	1.83875	0.264523	0.543848	-0.878726
577	331	tr|A0A131XL63|A0A131XL63_9ACAR	N/A	N/A	Putative 3-oxoacyl coa thiolase (Fragment) OS	Hyalomma excavatum PE	TRUE	-4.10647	0.00631	12294.8	25470.3	13658.5	23726.1	4842.6	4210.29	-13175.5	0.482711	-0.316313	2.07163	1.05077
578	734	tr|A0A131XYD6|A0A131XYD6_IXORI	N/A	N/A	Isocitrate dehydrogenase [NAD] subunit, mitochondrial OS	Ixodes ricinus PE	TRUE	-4.10068	0.00635	1293.5	9273.45	1227.78	9405.48	613.202	3843.4	-7979.95	0.139484	-0.855475	7.16927	2.84183
579	863	tr|A0A1E1WXY1|A0A1E1WXY1_9ACAR	N/A	N/A	Putative cuticle protein (Fragment) OS	Amblyomma aureolatum PE	TRUE	4.095	0.00639	28723.1	23139.1	29393.3	23023.7	2381.92	1328.18	5583.93	1.24132	0.0938837	0.805594	-0.311875
580	810	tr|A0A224Z3V5|A0A224Z3V5_9ACAR	N/A	N/A	M7GpppX diphosphatase OS	Rhipicephalus zambeziensis PE	TRUE	4.05257	0.00671	5436.77	1911.64	5458.61	1933.03	1702.6	357.363	3525.14	2.84404	0.453936	0.351613	-1.50794
581	556	tr|L7M765|L7M765_9ACAR	N/A	N/A	Dihydrolipoyl dehydrogenase OS	Rhipicephalus pulchellus PE	TRUE	4.02409	0.00693	92276.7	75552.9	92046.4	72622.6	1765.68	8122.11	16723.8	1.22135	0.0868407	0.818765	-0.288479
582	460	tr|V5HKJ7|V5HKJ7_IXORI	N/A	N/A	Putative 40s ribosomal protein OS	Ixodes ricinus PE	TRUE	-4.02103	0.00695	137680	155842	137826	157827	6022.84	6732.58	-18161.8	0.88346	-0.053813	1.13191	0.178763
583	456	tr|L7LTU7|L7LTU7_9ACAR	N/A	N/A	Putative methylenetetrahydrofolate dehydrogenase/methylenetetrahydrofolate cyclohydrolase OS	Rhipicephalus pulchellus PE	TRUE	-4.00558	0.00707	113265	149840	114572	150400	9507.58	15592	-36575.2	0.755905	-0.121533	1.32292	0.403723
584	60	tr|A0A224YSR0|A0A224YSR0_9ACAR	N/A	N/A	Lipoprotein amino terminal region OS	Rhipicephalus zambeziensis PE	TRUE	4.00167	0.00711	627927	161169	735492	161439	227360	52228.1	466758	3.89608	0.590628	0.256668	-1.96202
585	861	tr|A0A131XJ32|A0A131XJ32_9ACAR	N/A	N/A	Putative rna helicase OS	Hyalomma excavatum PE	TRUE	3.99214	0.00718	17283.7	13218	17433.7	13116.9	1593.71	1268.41	4065.7	1.30759	0.116471	0.764767	-0.386907
586	722	tr|L7LUH3|L7LUH3_9ACAR	N/A	N/A	Uncharacterized protein OS	Rhipicephalus pulchellus PE	TRUE	3.9582	0.00747	61427.4	44850.8	60378.5	45670.7	8066.86	2254.02	16576.7	1.3696	0.136592	0.730142	-0.45375
587	357	tr|A0A224ZBD7|A0A224ZBD7_9ACAR	N/A	N/A	UTP-glucose-1-phosphate uridylyltransferase OS	Rhipicephalus zambeziensis PE	TRUE	-3.95188	0.00752	77679.4	113263	70531.4	114716	17067.5	5745.02	-35583.6	0.685832	-0.163782	1.45808	0.544073
588	377	tr|A0A224Y399|A0A224Y399_9ACAR	N/A	N/A	Dipeptidyl peptidase 3 OS	Rhipicephalus zambeziensis PE	TRUE	3.91173	0.00788	63719.6	36751.5	63641	41859.4	3343.23	13376.9	26968.2	1.7338	0.238999	0.576768	-0.793937
589	871	tr|A0A224YS56|A0A224YS56_9ACAR	N/A	N/A	Proteasome subunit beta type OS	Rhipicephalus zambeziensis PE	TRUE	3.89247	0.00805	82445.4	70849.8	83824.6	71298.7	4372.26	4047.25	11595.5	1.16366	0.0658274	0.859355	-0.218674
590	81	tr|A0A224Z4Y4|A0A224Z4Y4_9ACAR	N/A	N/A	Myosin regulatory light chain 12 OS	Rhipicephalus zambeziensis PE	TRUE	3.86831	0.00828	560503	386441	537892	393016	63827.3	63442.7	174062	1.45042	0.161495	0.689454	-0.536474
591	906	tr|L7MFD7|L7MFD7_9ACAR	N/A	N/A	Putative ubiquilin-1 (Fragment) OS	Rhipicephalus pulchellus PE	TRUE	3.86773	0.00829	9277.3	1473.81	9977.85	1530.26	4023.73	303.794	7803.5	6.29479	0.798982	0.158861	-2.65416
592	232	tr|L7M2H2|L7M2H2_9ACAR	N/A	N/A	Coronin OS	Rhipicephalus pulchellus PE	TRUE	3.86402	0.00832	72445.3	52568.4	70142.4	55205.1	6498.32	7976.14	19876.9	1.37811	0.139285	0.725629	-0.462696
593	226	tr|L7M4H1|L7M4H1_9ACAR	N/A	N/A	Proteasome subunit alpha type OS	Rhipicephalus pulchellus PE	TRUE	3.86287	0.00833	199524	169000	199346	170081	12707.9	9395.21	30524.1	1.18062	0.0721087	0.847015	-0.23954
594	695	tr|A0A034WXH1|A0A034WXH1_RHIMP	N/A	N/A	Vitellogenin 5 (Fragment) OS	Rhipicephalus microplus PE	TRUE	3.8433	0.00853	27996.1	11452	27190.5	10875	2286.27	8300.16	16544	2.44464	0.388214	0.409059	-1.28962
595	308	tr|A0A224Z7D1|A0A224Z7D1_9ACAR	N/A	N/A	Pyruvate dehydrogenase E1 component beta subunit OS	Rhipicephalus zambeziensis PE	TRUE	-3.83266	0.00863	45401.8	57957.8	46208.8	57859.1	2025.21	6231.22	-12555.9	0.783361	-0.106038	1.27655	0.352251
596	333	tr|A0A224Z4A2|A0A224Z4A2_9ACAR	N/A	N/A	Phosphoribosylformylglycinamidine synthase OS	Rhipicephalus zambeziensis PE	TRUE	3.83183	0.00864	35624.3	20962.4	35160	20350.3	2951.24	7060.74	14661.9	1.69944	0.230306	0.588429	-0.765059
597	162	tr|A0A131Z4G4|A0A131Z4G4_RHIAP	N/A	N/A	Prohibitin 2 OS	Rhipicephalus appendiculatus PE	TRUE	3.81055	0.00886	109726	81445.2	109836	75232.6	2336.77	14658.2	28280.5	1.34723	0.129443	0.742262	-0.429999
598	721	tr|L7MM52|L7MM52_9ACAR	N/A	N/A	Putative emp24/gp25l/p24 family of membrane trafficking (Fragment) OS	Rhipicephalus pulchellus PE	TRUE	-3.8088	0.00888	12940.4	15601.9	13064.9	15249.3	1055.37	916.162	-2661.51	0.829411	-0.0812302	1.20567	0.269841
599	430	tr|L7M801|L7M801_9ACAR	N/A	N/A	Putative translocase of outer membrane 40 OS	Rhipicephalus pulchellus PE	TRUE	-3.77325	0.00925	64508.9	78806.9	62529.3	80057.1	4564.28	6050.07	-14298.1	0.818568	-0.0869451	1.22165	0.288825
600	209	tr|G3MLA0|G3MLA0_9ACAR	N/A	N/A	Uncharacterized protein OS	Amblyomma maculatum PE	TRUE	-3.7271	0.00977	142791	349240	146240	315446	10641.1	110270	-206449	0.408863	-0.388422	2.44581	1.29031
601	779	tr|A0A131YGD2|A0A131YGD2_RHIAP	N/A	N/A	Glycine rich superfamily member OS	Rhipicephalus appendiculatus PE	TRUE	3.71733	0.00988	28394.5	10069.9	27868.7	8792.99	1219.53	9783.27	18324.6	2.81973	0.450208	0.354644	-1.49556
602	564	tr|C9W1B7|C9W1B7_RHISA	N/A	N/A	Cytochrome c oxidase subunit OS	Rhipicephalus sanguineus PE	TRUE	-3.7151	0.00991	172296	181145	172321	181445	3231.56	3499.83	-8848.61	0.951152	-0.0217502	1.05136	0.0722525
603	732	tr|A0A224YSV1|A0A224YSV1_9ACAR	N/A	N/A	Alpha-L-fucosidase OS	Rhipicephalus zambeziensis PE	TRUE	3.7103	0.00997	32797.9	13025.3	32723.2	12707.3	1209.26	10589.4	19772.6	2.51801	0.401058	0.397138	-1.33229
604	793	tr|L7MCR9|L7MCR9_9ACAR	N/A	N/A	Uncharacterized protein (Fragment) OS	Rhipicephalus pulchellus PE	TRUE	3.66965	0.01046	19825.1	14184	19684.5	14248.2	2604.65	1633.47	5641.14	1.39771	0.145418	0.715455	-0.483067
605	414	tr|A0A131Z512|A0A131Z512_RHIAP	N/A	N/A	26S proteasome regulatory subunit N12 OS	Rhipicephalus appendiculatus PE	TRUE	3.66248	0.01055	73934.7	44998.2	74608.8	49828.3	11059.2	11286.5	28936.5	1.64306	0.215653	0.608621	-0.716385
606	298	tr|L7M6U9|L7M6U9_9ACAR	N/A	N/A	Uncharacterized protein OS	Rhipicephalus pulchellus PE	TRUE	-3.63591	0.01089	46504.6	65725.4	47609.8	64890.7	4381.7	9622.07	-19220.8	0.707559	-0.150237	1.41331	0.499077
607	243	tr|D0E0G4|D0E0G4_RHISA	N/A	N/A	Putative chitinase OS	Rhipicephalus sanguineus PE	TRUE	3.63066	0.01096	124995	29098.3	124642	3651.88	2732.78	52755.2	95896.5	4.29561	0.633025	0.232796	-2.10286
608	886	tr|A0A224YWZ5|A0A224YWZ5_9ACAR	N/A	N/A	DnaJ-like protein subfamily A member 1 OS	Rhipicephalus zambeziensis PE	TRUE	-3.59894	0.01138	43183.8	53294.5	44821.3	53060.4	5587.43	591.808	-10110.7	0.810287	-0.0913611	1.23413	0.303495
609	631	tr|L7M3R3|L7M3R3_9ACAR	N/A	N/A	Putative cargo transport protein OS	Rhipicephalus pulchellus PE	TRUE	3.59671	0.01141	80420.1	72041.6	80089.3	72783.4	2592.71	3870.92	8378.5	1.1163	0.0477812	0.895816	-0.158726
610	647	tr|A0A131XD84|A0A131XD84_9ACAR	N/A	N/A	Putative thioredoxin-like protein OS	Hyalomma excavatum PE	TRUE	3.57674	0.01169	26297.8	18676.7	25447.7	19334.5	3134.33	2887.23	7621.07	1.40805	0.148619	0.710201	-0.493701
611	246	tr|K7N8D7|K7N8D7_HAELO	N/A	N/A	Cuticular protein (Fragment) OS	Haemaphysalis longicornis PE	TRUE	-3.43181	0.01394	1.14349e+06	1.54084e+06	1.24879e+06	1.54086e+06	229540	30590.4	-397350	0.742122	-0.129525	1.34749	0.430273
612	145	tr|A0A224Z6N2|A0A224Z6N2_9ACAR	N/A	N/A	Regulatory protein mlp OS	Rhipicephalus zambeziensis PE	TRUE	3.41137	0.01429	3.925e+06	3.69291e+06	3.92774e+06	3.72013e+06	99025.9	93317.4	232088	1.06285	0.0264707	0.940869	-0.0879338
613	300	tr|A0A224YPE0|A0A224YPE0_9ACAR	N/A	N/A	Heat shock protein 90kDa beta OS	Rhipicephalus zambeziensis PE	TRUE	3.40358	0.01443	78650.4	46760.9	83362.7	47474.8	17101.5	7660.31	31889.5	1.68197	0.225818	0.594542	-0.750151
614	468	tr|A0A131XF26|A0A131XF26_9ACAR	N/A	N/A	Dihydrolipoamide acetyltransferase component of pyruvate dehydrogenase complex OS	Hyalomma excavatum PE	TRUE	-3.38492	0.01477	78866.7	102607	78436.8	101670	4583.17	13257.2	-23740.2	0.768629	-0.114283	1.30102	0.37964
615	332	tr|A0A224YDY6|A0A224YDY6_9ACAR	N/A	N/A	Cystatin-A/B OS	Rhipicephalus zambeziensis PE	TRUE	3.37987	0.01486	40554.7	17445.1	40097.1	16787.2	3261.56	13280.2	23109.6	2.32471	0.366368	0.430162	-1.21705
616	879	tr|Q7YW74|Q7YW74_9ACAR	N/A	N/A	Cathepsin L-like cysteine proteinase B OS	Rhipicephalus haemaphysaloides haemaphysaloides GN	TRUE	-3.37927	0.01487	32923	39136.3	33931.8	37987.8	2401.15	2785.11	-6213.25	0.841241	-0.0750798	1.18872	0.24941
617	576	tr|Q86G64|Q86G64_DERVA	N/A	N/A	40S ribosomal protein S5 OS	Dermacentor variabilis PE	TRUE	-3.37453	0.01496	88121.9	245305	85690	285847	27757.6	88927.1	-157183	0.359234	-0.444622	2.7837	1.477
618	78	tr|L7LRH1|L7LRH1_9ACAR	N/A	N/A	Putative glycine rich protein OS	Rhipicephalus pulchellus PE	TRUE	-3.37387	0.01497	1.65806e+06	2.35186e+06	1.55664e+06	2.48883e+06	256029	321870	-693801	0.704999	-0.151812	1.41844	0.504308
619	405	tr|A0A131XJ33|A0A131XJ33_9ACAR	N/A	N/A	Putative ubiquinone oxidoreductase ndufa5/b13 subunit OS	Hyalomma excavatum PE	TRUE	-3.36289	0.01518	120352	134945	117823	134464	8341.52	2395.86	-14592.9	0.891861	-0.049703	1.12125	0.16511
620	895	tr|G3MMB0|G3MMB0_9ACAR	N/A	N/A	S-(hydroxymethyl)glutathione dehydrogenase OS	Amblyomma maculatum PE	TRUE	3.3585	0.01526	16067.5	10859.5	15946.6	10995.8	458.924	3067.21	5207.95	1.47957	0.170137	0.67587	-0.565182
621	503	tr|L7M666|L7M666_9ACAR	N/A	N/A	Putative small nuclear ribonucleoprotein sm d3 OS	Rhipicephalus pulchellus PE	TRUE	3.35175	0.01539	148502	127989	148362	127522	8878.98	8425.84	20513.6	1.16028	0.0645615	0.861863	-0.214469
622	611	tr|C9W1M1|C9W1M1_RHISA	N/A	N/A	Mitochondrial ATP synthase epsilon chain OS	Rhipicephalus sanguineus PE	TRUE	3.306	0.01629	126749	108402	128337	110253	3388.73	10569	18346.7	1.16925	0.067906	0.855252	-0.225579
623	702	tr|A0A224YY37|A0A224YY37_9ACAR	N/A	N/A	Ribose-phosphate pyrophosphokinase OS	Rhipicephalus zambeziensis PE	TRUE	-3.30556	0.01629	26316.8	30642.4	26576.6	30882.3	1390.24	2217.45	-4325.68	0.858834	-0.066091	1.16437	0.219549
624	529	tr|F1Q0R0|F1Q0R0_CANLF	N/A	N/A	Keratin 14 OS	Canis lupus familiaris GN	TRUE	-3.28764	0.01666	18509.4	44204.6	18642.4	44522.7	14572.6	5654.96	-25695.2	0.418722	-0.378074	2.38822	1.25593
625	500	tr|L7ML89|L7ML89_9ACAR	N/A	N/A	40S ribosomal protein S26 (Fragment) OS	Rhipicephalus pulchellus PE	TRUE	-3.28435	0.01673	205762	326383	223605	324003	72323	12829.1	-120621	0.630431	-0.200363	1.58622	0.665591
626	274	tr|V5HZY4|V5HZY4_IXORI	N/A	N/A	Putative transcriptional activator protein (Fragment) OS	Ixodes ricinus PE	TRUE	-3.27491	0.01693	68918	80632.2	68378.1	82779.1	4848.36	5260.42	-11714.2	0.85472	-0.0681759	1.16997	0.226475
627	613	tr|L7M9J6|L7M9J6_9ACAR	N/A	N/A	Coatomer subunit beta' OS	Rhipicephalus pulchellus PE	TRUE	3.27289	0.01697	23412.3	18624.4	24200.3	18578	2383.4	1696.92	4787.85	1.25707	0.0993607	0.795498	-0.330069
628	233	tr|A0A131YLT1|A0A131YLT1_RHIAP	N/A	N/A	Myosin-light-chain kinase OS	Rhipicephalus appendiculatus PE	TRUE	3.2722	0.01699	283371	212259	284750	218321	11116.9	42018.6	71112	1.33502	0.125489	0.74905	-0.416866
629	559	tr|A0A224YXN2|A0A224YXN2_9ACAR	N/A	N/A	Ras-related protein Rab-1A OS	Rhipicephalus zambeziensis PE	TRUE	3.26512	0.01714	19222.7	7154.97	18939.2	7044.54	1914.61	7139.64	12067.7	2.68662	0.429206	0.372215	-1.42579
630	704	tr|L7MJC4|L7MJC4_9ACAR	N/A	N/A	Putative paxillin (Fragment) OS	Rhipicephalus pulchellus PE	TRUE	-3.25677	0.01732	39871.2	51801.8	41052.2	49250.1	4217.65	5990.93	-11930.6	0.769688	-0.113686	1.29923	0.377655
631	680	tr|A0A1E1X5I9|A0A1E1X5I9_9ACAR	N/A	N/A	Putative fumarylacetoacetase OS	Amblyomma aureolatum PE	TRUE	3.25418	0.01738	1930.23	802.825	1838.47	785.392	567.207	397.971	1127.4	2.40429	0.380988	0.415922	-1.26561
632	223	tr|L7M861|L7M861_9ACAR	N/A	N/A	Putative tropomodulin OS	Rhipicephalus pulchellus PE	TRUE	3.24576	0.01756	247864	204069	247740	210973	5329.73	26454.1	43794.5	1.21461	0.0844353	0.823312	-0.280488
633	605	tr|A0A224ZB69|A0A224ZB69_9ACAR	N/A	N/A	Tripeptidyl-peptidase II OS	Rhipicephalus zambeziensis PE	TRUE	3.21874	0.01817	21308.7	10880.3	22158.2	12281.5	2586.12	5941.36	10428.4	1.95846	0.291916	0.510604	-0.969722
634	445	tr|L7MAH9|L7MAH9_9ACAR	N/A	N/A	Succinyl-CoA:3-ketoacid-coenzyme A transferase OS	Rhipicephalus pulchellus PE	TRUE	3.21276	0.0183	68122.2	57454.9	67004.4	59329.4	2849.13	5998.33	10667.3	1.18566	0.0739617	0.843409	-0.245695
635	20	tr|A0A131YGT1|A0A131YGT1_RHIAP	N/A	N/A	Myosin heavy chain 6/7 OS	Rhipicephalus appendiculatus PE	TRUE	-3.1906	0.01882	159221	182237	158150	179504	5549.45	13317.2	-23015.7	0.873704	-0.0586356	1.14455	0.194783
636	114	tr|A0A224Z5F6|A0A224Z5F6_9ACAR	N/A	N/A	Vinculin OS	Rhipicephalus zambeziensis PE	TRUE	3.15487	0.01969	261229	201599	260820	195035	5079.25	37459.1	59630	1.29579	0.112533	0.771733	-0.373827
637	287	tr|A0A023FKF7|A0A023FKF7_9ACAR	N/A	N/A	Aconitate hydratase, mitochondrial OS	Amblyomma cajennense PE	TRUE	-3.13509	0.02019	140597	211306	136910	208561	10703.8	43819.4	-70708.6	0.665373	-0.176935	1.50292	0.587764
638	280	tr|A0A224YUJ1|A0A224YUJ1_9ACAR	N/A	N/A	Calcium-binding mitochondrial carrier protein Aralar1 OS	Rhipicephalus zambeziensis PE	TRUE	-3.0961	0.02122	125894	165397	125977	171028	18329.7	17753.7	-39503.3	0.761161	-0.118524	1.31378	0.393727
639	547	tr|A0A224YS01|A0A224YS01_9ACAR	N/A	N/A	Alpha-B-crystallin OS	Rhipicephalus zambeziensis PE	TRUE	3.07769	0.02173	67395.6	32094.1	73373.2	28295.8	19055.9	12772.1	35301.5	2.09994	0.322206	0.476205	-1.07035
640	675	tr|L7M7C9|L7M7C9_9ACAR	N/A	N/A	Putative ras-related protein OS	Rhipicephalus pulchellus PE	TRUE	-3.0524	0.02244	29856.6	31902.9	29909.2	31785.6	802.474	1074.08	-2046.25	0.93586	-0.0287891	1.06854	0.0956353
641	148	tr|L7M5J9|L7M5J9_9ACAR	N/A	N/A	Putative electron transfer flavoprotein alpha subunit OS	Rhipicephalus pulchellus PE	TRUE	3.02885	0.02313	266777	235892	270151	232664	15058.5	13753.8	30885.5	1.13093	0.0534361	0.884227	-0.177511
642	717	tr|A0A131XQF1|A0A131XQF1_9ACAR	N/A	N/A	Putative electron transfer flavoprotein ubiquinone oxidoreductase (Fragment) OS	Hyalomma excavatum PE	TRUE	-3.00787	0.02377	12761	26392.1	14601.6	26244.1	8927.65	1564.23	-13631.1	0.483515	-0.31559	2.06819	1.04837
643	268	tr|L7LWF2|L7LWF2_9ACAR	N/A	N/A	Putative nadh:ubiquinone oxidoreductase ndufs2/49 kDa subunit OS	Rhipicephalus pulchellus PE	TRUE	-3.0071	0.02379	82240.7	106620	83223.4	107394	7489.26	14381	-24379	0.771346	-0.112751	1.29644	0.37455
644	619	tr|A0A131YUN4|A0A131YUN4_RHIAP	N/A	N/A	Glutamate synthase (NADPH/NADH) OS	Rhipicephalus appendiculatus PE	TRUE	-3.007	0.02379	30293.9	35009.6	29483.9	35466.5	2862.1	1282.84	-4715.65	0.865304	-0.0628314	1.15566	0.208721
645	415	tr|Q8MTY1|Q8MTY1_RHIAP	N/A	N/A	Putative cement protein RIM36 OS	Rhipicephalus appendiculatus GN	TRUE	-3.00078	0.02398	335495	3.37677e+06	342528	4.32189e+06	24912.4	2.02684e+06	-3.04127e+06	0.0993539	-1.00282	10.065	3.33128
646	638	tr|L7M437|L7M437_9ACAR	N/A	N/A	Proteasome subunit beta type OS	Rhipicephalus pulchellus PE	TRUE	-2.99802	0.02407	27497.3	35979.6	27295.8	34416.9	3286.56	4606.27	-8482.22	0.764249	-0.116765	1.30847	0.387885
647	524	tr|L7M3V3|L7M3V3_9ACAR	N/A	N/A	Putative glutathione s-transferase OS	Rhipicephalus pulchellus PE	TRUE	2.98713	0.02441	177267	59533.3	141584	59608.5	78804.2	1920.35	117734	2.97762	0.473869	0.335839	-1.57416
648	778	tr|A0A224YS66|A0A224YS66_9ACAR	N/A	N/A	E3 SUMO-protein ligase RanBP2 OS	Rhipicephalus zambeziensis PE	TRUE	-2.98422	0.0245	3144.86	8109.21	3540.84	7252.43	1011.69	3169.53	-4964.36	0.387813	-0.411378	2.57856	1.36657
649	851	tr|L7MJQ0|L7MJQ0_9ACAR	N/A	N/A	Serine hydroxymethyltransferase (Fragment) OS	Rhipicephalus pulchellus PE	TRUE	2.944	0.02581	28604	22514.6	29398.7	23501.3	3266.75	2537.99	6089.37	1.27046	0.103962	0.787115	-0.345354
650	693	tr|A0A023FKJ8|A0A023FKJ8_9ACAR	N/A	N/A	Putative ca2+/calmodulin-dependent protein (Fragment) OS	Amblyomma cajennense PE	TRUE	-2.94143	0.0259	4322.01	7526	4903.13	7572.3	1262.37	1775.49	-3203.99	0.574277	-0.240879	1.74132	0.800181
651	687	tr|A0A224YW23|A0A224YW23_9ACAR	N/A	N/A	Poly [ADP-ribose] polymerase OS	Rhipicephalus zambeziensis PE	TRUE	2.92696	0.02639	30162.6	26888.5	29927.6	26534.7	2015.01	971.995	3274.09	1.12177	0.049902	0.891452	-0.165771
652	387	tr|L7MHR9|L7MHR9_9ACAR	N/A	N/A	Putative 60s ribosomal protein l23 (Fragment) OS	Rhipicephalus pulchellus PE	TRUE	-2.92296	0.02653	205220	242367	213402	238609	21051.4	14244.3	-37147.5	0.846731	-0.0722547	1.18101	0.240025
653	381	tr|L7LSI2|L7LSI2_9ACAR	N/A	N/A	Putative lysine-ketoglutarate reductase/saccharopine dehydrogenase OS	Rhipicephalus pulchellus PE	TRUE	-2.872	0.02835	63620.7	87198.2	65036.5	89450.1	12840	10233	-23577.5	0.72961	-0.136909	1.37059	0.454802
654	710	tr|A0A224Z0L0|A0A224Z0L0_9ACAR	N/A	N/A	Histone H1/5 OS	Rhipicephalus zambeziensis PE	TRUE	2.8461	0.02933	107473	98532.1	108362	99733.1	3579.76	5163.24	8940.76	1.09074	0.037721	0.916809	-0.125307
655	100	tr|A0A131XR05|A0A131XR05_9ACAR	N/A	N/A	Putative 60s ribosomal protein l4 (Fragment) OS	Hyalomma excavatum PE	TRUE	-2.83063	0.02993	847727	1.17449e+06	844454	1.15834e+06	16053.9	230315	-326760	0.721785	-0.141592	1.38545	0.470359
656	639	tr|L7M5Q2|L7M5Q2_9ACAR	N/A	N/A	Putative vamp vesicle-associated membrane protein-associated protein a OS	Rhipicephalus pulchellus PE	TRUE	-2.81807	0.03043	45941.2	56824.8	45918.6	56459.1	4293.71	6420.75	-10883.6	0.808471	-0.0923354	1.2369	0.306731
657	47	tr|A0A131YVP0|A0A131YVP0_RHIAP	N/A	N/A	Spectrin beta chain OS	Rhipicephalus appendiculatus PE	TRUE	-2.81023	0.03075	258871	294235	264035	292105	16582.6	18931.9	-35363.2	0.879813	-0.0556097	1.13661	0.184731
658	887	tr|A0A1E1XI57|A0A1E1XI57_9ACAR	N/A	N/A	Annexin (Fragment) OS	Amblyomma aureolatum PE	TRUE	2.79133	0.03152	31802	17884.5	33064.6	21752.8	3865.75	9192.15	13917.5	1.77819	0.249977	0.56237	-0.830407
659	697	tr|L7MFR3|L7MFR3_9ACAR	N/A	N/A	Putative carbonic anhydrase (Fragment) OS	Rhipicephalus pulchellus PE	TRUE	2.75823	0.03293	50362.8	42905.7	50431.5	42466.9	4557.21	2910.28	7457.15	1.1738	0.0695954	0.851931	-0.231191
660	772	tr|L7M6B6|L7M6B6_9ACAR	N/A	N/A	Histone H3 OS	Rhipicephalus pulchellus PE	TRUE	-2.73074	0.03415	1497.64	10330.6	1458.15	13280.8	402.92	6456.72	-8832.96	0.144971	-0.838719	6.89793	2.78616
661	217	tr|A0A224YHD4|A0A224YHD4_9ACAR	N/A	N/A	Amblyomma 40 33 family member OS	Rhipicephalus zambeziensis PE	TRUE	-2.71709	0.03478	188217	212954	189568	212098	7458.75	16610.6	-24737	0.883839	-0.0536269	1.13143	0.178145
662	181	tr|C9W1T0|C9W1T0_RHISA	N/A	N/A	Secreted protein (Fragment) OS	Rhipicephalus sanguineus PE	TRUE	2.70991	0.03511	3.14404e+06	552283	3.91693e+06	315493	1.8369e+06	533478	2.59176e+06	5.69281	0.755327	0.17566	-2.50914
663	573	tr|A0A1E1XM49|A0A1E1XM49_9ACAR	N/A	N/A	Putative netrin axonal chemotropic factor (Fragment) OS	Amblyomma sculptum PE	TRUE	2.70951	0.03513	105428	98389.2	104237	98129	2707.43	4434.14	7038.44	1.07154	0.030007	0.933239	-0.0996812
664	133	tr|A0A224Z298|A0A224Z298_9ACAR	N/A	N/A	Isocitrate dehydrogenase [NAD] subunit, mitochondrial OS	Rhipicephalus zambeziensis PE	TRUE	-2.6908	0.03601	317920	359815	318693	361063	20309.5	23604.4	-41894.6	0.883566	-0.0537609	1.13178	0.17859
665	282	tr|L7M227|L7M227_9ACAR	N/A	N/A	T-complex protein 1 subunit gamma OS	Rhipicephalus pulchellus PE	TRUE	-2.66101	0.03747	49207.5	60010.5	48939.3	59341.7	4932.05	6449.83	-10803	0.819982	-0.0861958	1.21954	0.286336
666	184	tr|A0A224Z543|A0A224Z543_9ACAR	N/A	N/A	NADH dehydrogenase (Ubiquinone) Fe-S protein 3 OS	Rhipicephalus zambeziensis PE	TRUE	2.65798	0.03763	42212.2	30897.7	43493.3	30003.2	3355.57	7824.37	11314.4	1.36619	0.135511	0.731963	-0.450158
667	467	tr|A0A224Z7N5|A0A224Z7N5_9ACAR	N/A	N/A	40S ribosomal protein S21 OS	Rhipicephalus zambeziensis PE	TRUE	-2.64161	0.03846	12338.9	17228.7	12116.4	16386.6	1861.99	3199.81	-4889.8	0.716182	-0.144977	1.39629	0.481602
668	822	tr|A0A0C7D6V6|A0A0C7D6V6_9RICK	N/A	N/A	Phosphomethylpyrimidine synthase OS	Ehrlichia minasensis OX	TRUE	-2.63602	0.03875	5864.18	8987.53	5795.98	8459.64	435.729	2329.35	-3123.35	0.65248	-0.185433	1.53261	0.615995
669	872	tr|A0A131XNZ1|A0A131XNZ1_9ACAR	N/A	N/A	Putative m20 peptidase aminoacylase 1-like protein 2 (Fragment) OS	Hyalomma excavatum PE	TRUE	2.62567	0.03929	12153.1	3442.46	14212.4	3227.57	6489.25	1383	8710.65	3.53036	0.547819	0.283257	-1.81982
670	149	tr|A0A224Z4T4|A0A224Z4T4_9ACAR	N/A	N/A	Sodium/potassium-transporting ATPase subunit beta OS	Rhipicephalus zambeziensis PE	TRUE	-2.5908	0.04117	1.36864e+06	1.71385e+06	1.37473e+06	1.80824e+06	28865.4	264926	-345217	0.798573	-0.0976855	1.25223	0.324504
671	172	tr|A0A224YL20|A0A224YL20_9ACAR	N/A	N/A	Determination of adult lifespan OS	Rhipicephalus zambeziensis PE	TRUE	2.58923	0.04125	999282	753771	998473	835794	16626.7	188910	245511	1.32571	0.122449	0.754312	-0.406766
672	183	tr|A0A131YXB7|A0A131YXB7_RHIAP	N/A	N/A	Transketolase OS	Rhipicephalus appendiculatus PE	TRUE	2.57661	0.04196	322814	250745	324219	251421	53971	14715.3	72069.4	1.28742	0.109721	0.776746	-0.364484
673	424	tr|A0A224YSF8|A0A224YSF8_9ACAR	N/A	N/A	Large subunit ribosomal protein L31e OS	Rhipicephalus zambeziensis PE	TRUE	2.57466	0.04207	131453	120229	129396	119883	5969.8	6355.05	11224.6	1.09336	0.0387632	0.914612	-0.128769
674	492	tr|A0A023FIT8|A0A023FIT8_9ACAR	N/A	N/A	Putative myosin regulatory light chain ixodes scapularis myosin regulatory light chain (Fragment) OS	Amblyomma cajennense PE	TRUE	-2.53619	0.04431	269089	510327	176451	510478	189821	12567.1	-241238	0.527287	-0.277953	1.8965	0.92334
675	891	tr|A0A023GJ32|A0A023GJ32_9ACAR	N/A	N/A	Ribosomal protein L19 OS	Amblyomma triste PE	TRUE	-2.48148	0.04771	3689.41	16360.5	3634.31	18949.3	1842.31	10045	-12671.1	0.225507	-0.646839	4.43445	2.14875
676	464	tr|B5ABL8|B5ABL8_DERVA	N/A	N/A	Hemelipoglycoprotein 2 (Fragment) OS	Dermacentor variabilis PE	TRUE	2.46537	0.04876	1.20207e+06	480398	1.20068e+06	193177	44954.4	583718	721671	2.50224	0.398328	0.399643	-1.32322
677	839	tr|A0A224YEL2|A0A224YEL2_9ACAR	N/A	N/A	Glycine rich superfamily member OS	Rhipicephalus zambeziensis PE	TRUE	-2.45488	0.04946	6966.28	14602.3	6052.7	14821.6	5764.38	2339.66	-7636.01	0.477068	-0.32142	2.09614	1.06773
678	553	tr|A0A1E1XM95|A0A1E1XM95_9ACAR	N/A	N/A	Putative cytoskeletal regulator flightless-i (Fragment) OS	Amblyomma sculptum PE	TRUE	2.43221	0.05101	32837.8	18173.7	32939.1	21347.5	2226.86	11850.8	14664.1	1.80688	0.25693	0.553439	-0.853503
679	741	tr|A0A131XK53|A0A131XK53_9ACAR	N/A	N/A	ATP synthase subunit beta (Fragment) OS	Hyalomma excavatum PE	TRUE	-2.42405	0.05158	2027.76	11065.7	2113.03	11006	1365.22	7330.85	-9037.94	0.183247	-0.736963	5.45711	2.44814
680	723	tr|A0A224Z7Y4|A0A224Z7Y4_9ACAR	N/A	N/A	Ribosomal protein l37a OS	Rhipicephalus zambeziensis PE	TRUE	-2.40867	0.05267	54758.1	59864.9	54819.3	60892.9	2296.84	3564.49	-5106.87	0.914693	-0.0387244	1.09326	0.12864
681	834	tr|A0A131YJV2|A0A131YJV2_RHIAP	N/A	N/A	PDZ and LIM domain protein Zasp OS	Rhipicephalus appendiculatus PE	TRUE	2.40226	0.05313	46282.5	25831.4	45840.4	25991	17012.1	701.127	20451.1	1.79171	0.253268	0.558125	-0.84134
682	115	tr|L7M7N7|L7M7N7_9ACAR	N/A	N/A	Aspartate aminotransferase OS	Rhipicephalus pulchellus PE	TRUE	-2.39623	0.05357	4573.67	13968.4	4477.75	14916.9	1651.09	7665.43	-9394.68	0.327431	-0.48488	3.05408	1.61074
683	305	tr|A0A224Z940|A0A224Z940_9ACAR	N/A	N/A	Thioredoxin OS	Rhipicephalus zambeziensis PE	TRUE	2.39521	0.05364	52023	43939	51955.8	44514.6	6251.16	2547.15	8084.07	1.18398	0.0733458	0.844606	-0.24365
684	372	tr|A0A224YWJ2|A0A224YWJ2_9ACAR	N/A	N/A	Peptidylprolyl isomerase OS	Rhipicephalus zambeziensis PE	TRUE	2.39156	0.05391	409975	402726	410690	404391	4769.28	3741.66	7248.63	1.018	0.00774731	0.982319	-0.025736
685	656	tr|A0A131XEE1|A0A131XEE1_9ACAR	N/A	N/A	Putative nadh-ubiquinone oxidoreductase subunit ndufb10/pdsw OS	Hyalomma excavatum PE	TRUE	-2.38819	0.05416	53794.2	91962.8	59210.8	104676	11594.6	29787.5	-38168.6	0.584956	-0.232877	1.70953	0.773599
686	486	tr|C9W1H9|C9W1H9_RHISA	N/A	N/A	NADH dehydrogenase 1 alpha subcomplex OS	Rhipicephalus sanguineus PE	TRUE	-2.37538	0.05511	131980	138943	131993	138011	2027.57	5501.11	-6963.27	0.949884	-0.0223295	1.05276	0.0741768
687	439	tr|A0A224ZBY8|A0A224ZBY8_9ACAR	N/A	N/A	Vitellogenin 3 OS	Rhipicephalus zambeziensis PE	TRUE	2.36912	0.05559	100623	89681.8	98722.6	88714.4	6128.14	6911.2	10941.6	1.122	0.0499946	0.891262	-0.166078
688	219	tr|A0A1E1X6J1|A0A1E1X6J1_9ACAR	N/A	N/A	Putative titin (Fragment) OS	Amblyomma aureolatum PE	TRUE	2.36857	0.05563	114422	85106.8	113462	82805.4	7515.74	23584.8	29315.1	1.34445	0.128545	0.743798	-0.427017
689	828	tr|L7M3Z2|L7M3Z2_9ACAR	N/A	N/A	Putative rna polymerase ii transcription elongation factor elongin/siii subunit elongin b OS	Rhipicephalus pulchellus PE	TRUE	2.36364	0.05601	20935.4	11368.4	20761	10490.9	7455.21	3154.55	9566.99	1.84154	0.265182	0.543022	-0.880917
690	531	tr|A0A131XI00|A0A131XI00_9ACAR	N/A	N/A	Putative enoyl-coa hydratase OS	Hyalomma excavatum PE	TRUE	2.35535	0.05664	91227.6	84235	92752.4	84805.7	3725.74	4623.3	6992.65	1.08301	0.0346339	0.923349	-0.115051
691	877	tr|A0A023FHU4|A0A023FHU4_9ACAR	N/A	N/A	Annexin (Fragment) OS	Amblyomma cajennense PE	TRUE	2.35333	0.0568	45284	20685	41846.9	21156.1	12163.8	17002.7	24599	2.18922	0.34029	0.456783	-1.13042
692	709	tr|A0A224YNE1|A0A224YNE1_9ACAR	N/A	N/A	Gluconolactonase OS	Rhipicephalus zambeziensis PE	TRUE	2.34649	0.05733	53646.8	26481.9	54287.2	24690.9	1695.13	23091.5	27164.9	2.02579	0.306594	0.493635	-1.01848
693	158	tr|L7M0S5|L7M0S5_9ACAR	N/A	N/A	Glycerol-3-phosphate dehydrogenase OS	Rhipicephalus pulchellus PE	TRUE	-2.34386	0.05754	135687	175428	141788	175469	23830.9	24125.5	-39741.2	0.773461	-0.111561	1.29289	0.370599
694	199	tr|L7LYA7|L7LYA7_9ACAR	N/A	N/A	Putative 26s proteasome regulatory complex atpase rpt2 OS	Rhipicephalus pulchellus PE	TRUE	-2.33549	0.0582	162560	177468	163707	179173	4437.46	11970.4	-14908	0.915996	-0.0381063	1.09171	0.126586
695	626	tr|B7PQE0|B7PQE0_IXOSC	N/A	N/A	Coatomer, alpha chain, putative (Fragment) OS	Ixodes scapularis GN	TRUE	2.30841	0.0604	22627.5	18283.2	22835.8	17974.2	1469.11	3465.3	4344.25	1.23761	0.0925834	0.80801	-0.307555
696	248	tr|A0A224Z0I5|A0A224Z0I5_9ACAR	N/A	N/A	T-complex protein 1 subunit theta OS	Rhipicephalus zambeziensis PE	TRUE	-2.30788	0.06044	25477.5	37164.5	25342.1	37527.8	3175.54	9617.23	-11687.1	0.685532	-0.163972	1.45872	0.544704
697	590	tr|L7M2D0|L7M2D0_9ACAR	N/A	N/A	Putative mitochondrial chaperonin OS	Rhipicephalus pulchellus PE	TRUE	-2.28034	0.06277	60588.6	75825.2	63039.1	75835.4	9049.81	9832.7	-15236.6	0.799057	-0.0974225	1.25148	0.323631
698	327	tr|L7M5K4|L7M5K4_9ACAR	N/A	N/A	Putative chloride intracellular channel 6-like protein OS	Rhipicephalus pulchellus PE	TRUE	2.26744	0.06389	137991	126718	137605	126640	5290.59	8419.06	11273	1.08896	0.0370125	0.918306	-0.122953
699	609	tr|A0A131YW70|A0A131YW70_RHIAP	N/A	N/A	Crystallin, alpha B OS	Rhipicephalus appendiculatus PE	TRUE	-2.25456	0.06503	21783.4	31276.4	23284.4	32212	7904.47	2904.17	-9492.92	0.696482	-0.15709	1.43579	0.521841
700	876	tr|A0A131XL84|A0A131XL84_9ACAR	N/A	N/A	Putative adenosine monophosphate deaminase (Fragment) OS	Hyalomma excavatum PE	TRUE	-2.23777	0.06655	3933.04	17418.4	3911.3	19000.5	1773.67	11921.3	-13485.4	0.225798	-0.646281	4.42875	2.1469
701	57	tr|L7LXL4|L7LXL4_9ACAR	N/A	N/A	Inosine-5'-monophosphate dehydrogenase OS	Rhipicephalus pulchellus PE	TRUE	2.22923	0.06734	1.04893e+06	981389	1.03357e+06	994475	51757.2	31517.1	67543.5	1.06882	0.0289064	0.935607	-0.0960248
702	769	tr|A0A023FLD4|A0A023FLD4_9ACAR	N/A	N/A	Putative acetyl-coa acetyltransferase OS	Amblyomma cajennense PE	TRUE	2.19878	0.07022	82705.4	65851.6	78893.4	66118.5	14994.4	3190.94	16853.9	1.25594	0.0989681	0.796218	-0.328765
703	753	tr|L7M5P4|L7M5P4_9ACAR	N/A	N/A	Putative prohibitin-like protein OS	Rhipicephalus pulchellus PE	TRUE	2.19775	0.07032	62456	50388.4	63128.2	51877.5	9610.44	5313.94	12067.6	1.23949	0.0932433	0.806783	-0.309747
704	337	tr|L7M7I7|L7M7I7_9ACAR	N/A	N/A	Putative alkyl hydroperoxide reductase thiol specific antioxidant OS	Rhipicephalus pulchellus PE	TRUE	-2.17072	0.07299	143434	155220	141153	156286	9421.46	5398.09	-11785.2	0.924074	-0.0342933	1.08216	0.11392
705	815	tr|A0A224YDZ8|A0A224YDZ8_9ACAR	N/A	N/A	Replication factor A3 OS	Rhipicephalus zambeziensis PE	TRUE	2.16305	0.07377	9813.99	6184.29	9734.49	4769.42	1204.4	3132.53	3629.7	1.58692	0.200556	0.630151	-0.666231
706	768	tr|E2R917|E2R917_CANLF	N/A	N/A	Keratin 75 OS	Canis lupus familiaris GN	TRUE	-2.16164	0.07391	13847.3	43890.5	13835.5	53450.1	13029.3	24553.8	-30043.2	0.315496	-0.501006	3.16961	1.6643
707	242	tr|A0A131Z580|A0A131Z580_RHIAP	N/A	N/A	Aldehyde dehydrogenase family 7 member A1 OS	Rhipicephalus appendiculatus PE	TRUE	-2.14901	0.07521	202099	221318	204855	225414	8227.76	15881.8	-19219.1	0.913161	-0.0394528	1.0951	0.131059
708	630	tr|A0A224YI64|A0A224YI64_9ACAR	N/A	N/A	ATP-dependent RNA helicase DDX1 OS	Rhipicephalus zambeziensis PE	TRUE	-2.14322	0.07581	4363.12	6973.3	4710.2	6811.23	1419.66	1979.26	-2610.17	0.62569	-0.203641	1.59824	0.67648
709	686	tr|L7LXM0|L7LXM0_9ACAR	N/A	N/A	Uncharacterized protein OS	Rhipicephalus pulchellus PE	TRUE	2.11474	0.07885	14311.2	7398.63	14457.3	6633.83	1811.08	6281.62	6912.54	1.9343	0.286524	0.516983	-0.951811
710	262	tr|L7MFA9|L7MFA9_9ACAR	N/A	N/A	Putative 40s ribosomal protein s2 (Fragment) OS	Rhipicephalus pulchellus PE	TRUE	2.09864	0.08063	502050	465633	490486	458880	31372.9	14839.1	36417	1.07821	0.0327032	0.927463	-0.108638
711	374	tr|L7M8J0|L7M8J0_9ACAR	N/A	N/A	Uncharacterized protein OS	Rhipicephalus pulchellus PE	TRUE	-2.09287	0.08128	14839.6	52695	14282.7	62851	15411.8	32728.4	-37855.4	0.281614	-0.550346	3.55096	1.82821
712	563	tr|L7LXH5|L7LXH5_9ACAR	N/A	N/A	Putative emp24/gp25l/p24 family of membrane trafficking OS	Rhipicephalus pulchellus PE	TRUE	2.08951	0.08165	109629	86382.3	113656	85201.9	21518.6	5662.2	23246.9	1.26912	0.103502	0.78795	-0.343825
713	678	tr|A0A1E1X3J5|A0A1E1X3J5_9ACAR	N/A	N/A	Putative cystein protease calpain-b (Fragment) OS	Amblyomma aureolatum PE	TRUE	2.06853	0.08406	28629.6	23000.3	28103.3	23947	3502.28	4166.22	5629.24	1.24475	0.0950807	0.803377	-0.315851
714	227	tr|L7M4Z0|L7M4Z0_9ACAR	N/A	N/A	Putative phosphoenolpyruvate carboxykinase OS	Rhipicephalus pulchellus PE	TRUE	2.04776	0.08651	175435	109150	192132	108024	64642	3539.11	66284.9	1.60728	0.206092	0.622168	-0.684624
715	409	tr|A0A131XDJ4|A0A131XDJ4_9ACAR	N/A	N/A	Putative prohibitins and stomatins of the pid superfamily protein OS	Hyalomma excavatum PE	TRUE	-2.03182	0.08844	32859.2	43531.4	31485.2	45833.4	4491.2	9496.58	-10672.2	0.75484	-0.122145	1.32478	0.405757
716	277	tr|A0A131YMQ4|A0A131YMQ4_RHIAP	N/A	N/A	T-complex protein 1 subunit zeta OS	Rhipicephalus appendiculatus PE	TRUE	1.99743	0.09276	77832.1	70915.2	79131.2	70957.7	5971.39	3508.42	6916.88	1.09754	0.0404193	0.911131	-0.13427
717	429	tr|Q6B8B6|Q6B8B6_9ACAR	N/A	N/A	Ribosomal protein S15 OS	Ixodes pacificus PE	TRUE	-1.99315	0.09331	15958.6	21819.2	17134.3	21280.3	5632.29	1691.31	-5860.61	0.731401	-0.135844	1.36724	0.451266
718	208	tr|L7M8R4|L7M8R4_9ACAR	N/A	N/A	Putative 26s protease regulatory subunit 7 OS	Rhipicephalus pulchellus PE	TRUE	-1.99202	0.09345	213998	257710	226736	262824	41972.1	12822.9	-43712.1	0.830382	-0.0807218	1.20426	0.268152
719	796	tr|L7M1I4|L7M1I4_9ACAR	N/A	N/A	Putative karyopherin importin beta 1 OS	Rhipicephalus pulchellus PE	TRUE	-1.96364	0.0972	2476.55	4318.99	2479.18	3998.79	265.769	1857.64	-1842.44	0.57341	-0.241534	1.74395	0.80236
720	541	tr|L7LYW8|L7LYW8_9ACAR	N/A	N/A	Serine/threonine-protein phosphatase OS	Rhipicephalus pulchellus PE	TRUE	1.96227	0.09739	57549.4	51545	56588.3	52074.7	3964.9	4661.76	6004.39	1.11649	0.0478542	0.895666	-0.158968
721	860	tr|L7M3A1|L7M3A1_9ACAR	N/A	N/A	Putative d-3-phosphoglycerate dehydrogen OS	Rhipicephalus pulchellus PE	TRUE	-1.94318	0.1	390.022	761.381	285.474	795.929	297.627	239.809	-371.359	0.512256	-0.290513	1.95215	0.965062
722	290	tr|L7M7M2|L7M7M2_9ACAR	N/A	N/A	Uncharacterized protein OS	Rhipicephalus pulchellus PE	TRUE	1.94089	0.10032	28727.1	23615.5	29901.1	24212.9	3965.77	3466.65	5111.69	1.21646	0.0850961	0.822061	-0.282683
723	821	tr|A0A131XPX1|A0A131XPX1_9ACAR	N/A	N/A	Putative ubiquinone oxidoreductase ndufa2/b8 subunit (Fragment) OS	Hyalomma excavatum PE	TRUE	1.93961	0.1005	20140.3	13547	20383.3	16261.4	2876.32	6160.25	6593.38	1.48671	0.172225	0.672628	-0.572118
724	404	tr|A0A131XIK8|A0A131XIK8_9ACAR	N/A	N/A	Putative glycyl-trna synthetase-like protein OS	Hyalomma excavatum PE	TRUE	1.93428	0.10124	143826	132494	145284	133244	5917.57	10113.9	11332.8	1.08553	0.0356437	0.921205	-0.118406
725	774	tr|B7QIS3|B7QIS3_IXOSC	N/A	N/A	3-hydroxyacyl-CoA dehydrogenase, putative OS	Ixodes scapularis GN	TRUE	-1.92958	0.1019	21216.6	32582.1	24429.5	32877	11537.1	2381.13	-11365.5	0.651173	-0.186304	1.53569	0.618888
726	598	tr|A0A1E1X4T0|A0A1E1X4T0_9ACAR	N/A	N/A	Putative ribose-phosphate pyrophosphokinase (Fragment) OS	Amblyomma aureolatum PE	TRUE	-1.92621	0.10238	45378.7	51491.9	45677.4	51869.7	1523.45	6161.77	-6113.11	0.88128	-0.0548861	1.13471	0.182328
727	896	tr|Q86G70|Q86G70_DERVA	N/A	N/A	Putative HMG-like protein OS	Dermacentor variabilis PE	TRUE	-1.92256	0.1029	55680.9	62905.4	55490.1	64214.1	1866.21	7280.08	-7224.46	0.885154	-0.0529814	1.12975	0.176
728	222	tr|G3MMG2|G3MMG2_9ACAR	N/A	N/A	40S ribosomal protein S4 OS	Amblyomma maculatum PE	TRUE	1.91204	0.10441	178967	130054	191757	131972	29558.8	41759.8	48912.5	1.37609	0.138648	0.726695	-0.460578
729	842	tr|G3ML11|G3ML11_9ACAR	N/A	N/A	Uncharacterized protein OS	Amblyomma maculatum PE	TRUE	1.90425	0.10555	3335.86	1953.72	3411.64	1746.8	228.735	1433.51	1382.15	1.70745	0.232347	0.58567	-0.771839
730	207	tr|A0A131Z2D8|A0A131Z2D8_RHIAP	N/A	N/A	T-complex protein 1 subunit beta OS	Rhipicephalus appendiculatus PE	TRUE	1.8907	0.10755	93638.8	89215.3	93069.5	90171.1	3382.25	3233.46	4423.49	1.04958	0.0210164	0.95276	-0.0698151
731	614	tr|A0A131YLL6|A0A131YLL6_RHIAP	N/A	N/A	Toll-like receptor 5 OS	Rhipicephalus appendiculatus PE	TRUE	1.88242	0.10879	23857.9	12576.8	23590	11073	11352.7	3843.83	11281.1	1.89698	0.278063	0.527154	-0.923704
732	164	tr|A0A131XL81|A0A131XL81_9ACAR	N/A	N/A	Putative medium chain acyl-coa dehydrogenase OS	Hyalomma excavatum PE	TRUE	-1.87219	0.11034	131828	151124	134430	143705	8158.36	18929.6	-19295.5	0.87232	-0.0593242	1.14637	0.197071
733	131	tr|A0A224YQ23|A0A224YQ23_9ACAR	N/A	N/A	26S protease regulatory subunit 6A-B OS	Rhipicephalus zambeziensis PE	TRUE	1.85004	0.11378	247853	226265	252957	225344	21485.9	9111.34	21588	1.09541	0.0395769	0.9129	-0.131472
734	388	tr|V5HR13|V5HR13_IXORI	N/A	N/A	Putative sarcomere (Fragment) OS	Ixodes ricinus PE	TRUE	1.84205	0.11505	229701	215062	229703	215520	6520.86	14494.3	14638.4	1.06807	0.0285981	0.936272	-0.0950008
735	711	tr|L7M6U3|L7M6U3_9ACAR	N/A	N/A	Uncharacterized protein OS	Rhipicephalus pulchellus PE	TRUE	1.83484	0.11621	36901.6	23711.3	36647.6	27844.9	559.149	14366.7	13190.3	1.55628	0.192089	0.642556	-0.638106
736	109	tr|A0A131YNN3|A0A131YNN3_RHIAP	N/A	N/A	15-hydroxyprostaglandin dehydrogenase (NAD) OS	Rhipicephalus appendiculatus PE	TRUE	-1.82809	0.1173	1.50929e+06	1.76264e+06	1.49075e+06	1.7514e+06	271641	55103.1	-253349	0.856267	-0.0673906	1.16786	0.223867
737	309	tr|A0A224Z6W7|A0A224Z6W7_9ACAR	N/A	N/A	Ribosomal protein s17 OS	Rhipicephalus zambeziensis PE	TRUE	1.79743	0.12239	180223	166757	178613	169046	5738.86	13840.4	13465.5	1.08075	0.0337249	0.925284	-0.112032
738	899	tr|L7M921|L7M921_9ACAR	N/A	N/A	Putative lysosomal & prostatic acid phosphatase OS	Rhipicephalus pulchellus PE	TRUE	1.79054	0.12356	42167.5	30536	42614	35124.6	8352.33	9951.68	11631.5	1.38091	0.140166	0.72416	-0.46562
739	42	tr|A0A131XQM1|A0A131XQM1_9ACAR	N/A	N/A	Putative myosin alkali light chain protein OS	Hyalomma excavatum PE	TRUE	1.78512	0.12449	95292.5	3577.04	95354.8	3483.16	102753	808.001	91715.5	26.6401	1.42554	0.0375374	-4.73553
740	508	tr|L7LUL6|L7LUL6_9ACAR	N/A	N/A	Putative mitochondrial/plastidial beta-ketoacyl-acp reductase OS	Rhipicephalus pulchellus PE	TRUE	1.78014	0.12535	53618.4	46929.8	52357.3	46621.9	5558.42	5057.05	6688.57	1.14252	0.0578649	0.875256	-0.192223
741	31	tr|A0A224YVU2|A0A224YVU2_9ACAR	N/A	N/A	Elongation factor 2-like OS	Rhipicephalus zambeziensis PE	TRUE	1.77917	0.12552	156617	85039.4	150128	92226.6	77749.6	20713.7	71577.3	1.8417	0.265218	0.542978	-0.881035
742	612	tr|B7PVG5|B7PVG5_IXOSC	N/A	N/A	Obg-like ATPase 1 OS	Ixodes scapularis GN	TRUE	1.76079	0.12876	66046.2	34832.8	81225.6	35535.7	35273.6	3571.55	31213.4	1.89609	0.277859	0.5274	-0.923029
743	569	tr|A0A0A7MGQ1|A0A0A7MGQ1_9ACAR	N/A	N/A	Cystatin OS	Rhipicephalus haemaphysaloides PE	TRUE	1.74378	0.13182	1444.33	878.137	1372.4	877.046	555.222	336.788	566.191	1.64476	0.216103	0.60799	-0.71788
744	30	tr|L7M741|L7M741_9ACAR	N/A	N/A	Putative hydroxyacyl-coenzyme a dehydrogenase/3-ketoacyl-coenzyme a thiolase/enoyl-coenzyme a hydrat OS	Rhipicephalus pulchellus PE	TRUE	1.73312	0.13378	394661	364131	396118	372306	4521.87	34939.8	30530	1.08384	0.0349665	0.922643	-0.116156
745	348	tr|A0A131YH49|A0A131YH49_RHIAP	N/A	N/A	Myosin light chain 6 OS	Rhipicephalus appendiculatus PE	TRUE	1.71138	0.13786	424446	375322	425053	392285	13363.1	55830.7	49123.2	1.13088	0.0534176	0.884265	-0.177449
746	444	tr|V5I1L1|V5I1L1_IXORI	N/A	N/A	Putative ribosomal protein l30 (Fragment) OS	Ixodes ricinus PE	TRUE	1.70404	0.13926	56815.8	28182.7	64750.2	29820.2	26313.7	20903.6	28633.1	2.01598	0.304487	0.496036	-1.01148
747	625	tr|A0A224Z0D2|A0A224Z0D2_9ACAR	N/A	N/A	Histidine ammonia-lyase OS	Rhipicephalus zambeziensis PE	TRUE	1.70378	0.13931	3158.01	2018.49	3337.43	1794.08	1137.94	703.1	1139.52	1.56454	0.194387	0.639165	-0.645739
748	858	tr|Q4PMC2|Q4PMC2_IXOSC	N/A	N/A	Ribosomal protein S20 OS	Ixodes scapularis GN	TRUE	1.67828	0.1443	146455	138311	149654	137440	8126.66	5306.09	8144.29	1.05888	0.0248484	0.944391	-0.0825445
749	640	tr|A0A224YSA5|A0A224YSA5_9ACAR	N/A	N/A	Large subunit ribosomal protein L14e OS	Rhipicephalus zambeziensis PE	TRUE	-1.67005	0.14595	74465.8	83035.6	74165.5	82767	2462.05	9963.23	-8569.8	0.896794	-0.0473075	1.11508	0.157152
750	216	tr|L7M579|L7M579_9ACAR	N/A	N/A	Dolichyl-diphosphooligosaccharide--protein glycosyltransferase 48 kDa subunit OS	Rhipicephalus pulchellus PE	TRUE	-1.66499	0.14697	325035	355549	324758	352953	3875.71	36448.5	-30514.2	0.914177	-0.0389696	1.09388	0.129454
751	852	tr|G3MT47|G3MT47_9ACAR	N/A	N/A	Uncharacterized protein OS	Amblyomma maculatum PE	TRUE	1.64053	0.152	18483	10807.8	20759	11032.9	5518.33	7556.55	7675.24	1.71016	0.233036	0.584742	-0.774129
752	786	tr|V5IFJ9|V5IFJ9_IXORI	N/A	N/A	Putative cut up OS	Ixodes ricinus PE	TRUE	1.63291	0.15361	165011	97857.2	162826	88955.8	78395.3	24886.4	67153.8	1.68624	0.22692	0.593034	-0.753813
753	902	tr|A0A131YHI8|A0A131YHI8_RHIAP	N/A	N/A	Dihydrodiol dehydrogenase / D-xylose 1-dehydrogenase (NADP) OS	Rhipicephalus appendiculatus PE	TRUE	1.63247	0.1537	12817.8	10851.4	12559.8	11136.6	1372.67	1979.81	1966.41	1.18121	0.0723279	0.846588	-0.240268
754	868	tr|A0A131YVZ3|A0A131YVZ3_RHIAP	N/A	N/A	FUN14 domain-containing protein 1 OS	Rhipicephalus appendiculatus PE	TRUE	-1.61715	0.15697	21252.5	28262	24631.5	28914.6	7976.38	3395.5	-7009.57	0.751979	-0.123794	1.32982	0.411235
755	88	tr|L7M880|L7M880_9ACAR	N/A	N/A	Rab GDP dissociation inhibitor OS	Rhipicephalus pulchellus PE	TRUE	1.58735	0.16353	38748.5	29250.1	38554.9	29864.6	3783.27	11353.9	9498.4	1.32473	0.122128	0.75487	-0.405699
756	93	tr|L7M4A5|L7M4A5_9ACAR	N/A	N/A	Peptidyl-prolyl cis-trans isomerase OS	Rhipicephalus pulchellus PE	TRUE	-1.58549	0.16395	1.49697e+06	1.62409e+06	1.5614e+06	1.61682e+06	141489	75461	-127120	0.921729	-0.0353969	1.08492	0.117586
757	168	tr|A0A224Z2G3|A0A224Z2G3_9ACAR	N/A	N/A	Troponin T fast skeletal muscle OS	Rhipicephalus zambeziensis PE	TRUE	1.57125	0.16718	832352	657845	844104	588262	155240	158873	174507	1.26527	0.102184	0.790345	-0.339446
758	321	tr|B7PLC7|B7PLC7_IXOSC	N/A	N/A	Cuticular protein, putative OS	Ixodes scapularis GN	TRUE	-1.53599	0.17545	257821	268993	259343	265789	7342.27	12557.8	-11171.8	0.958468	-0.0184224	1.04333	0.0611978
759	890	tr|A0A224YDI7|A0A224YDI7_9ACAR	N/A	N/A	Chitin-binding protein OS	Rhipicephalus zambeziensis PE	TRUE	-1.5095	0.18191	7156.66	13169.3	8530.86	15738.2	3850.01	6974.26	-6012.61	0.543437	-0.264851	1.84014	0.879816
760	837	tr|L7M423|L7M423_9ACAR	N/A	N/A	Putative ribosomal protein OS	Rhipicephalus pulchellus PE	TRUE	1.49463	0.18563	43257	30368.6	42969	36629.1	1463.26	17184.1	12888.4	1.4244	0.153631	0.702051	-0.510352
761	907	tr|V5HPV8|V5HPV8_IXORI	N/A	N/A	Putative ataxin-2 binding protein 1 (Fragment) OS	Ixodes ricinus PE	TRUE	1.46796	0.19249	25676.5	20746.4	24989.4	22264.3	3498.24	5734.04	4930.08	1.23764	0.0925926	0.807993	-0.307586
762	317	tr|L7MAA3|L7MAA3_9ACAR	N/A	N/A	Putative chaperonin chaperonin OS	Rhipicephalus pulchellus PE	TRUE	1.46708	0.19272	92226.6	83980.5	92907.4	84103.4	4811.08	10160	8246.12	1.09819	0.0406778	0.910589	-0.135129
763	446	tr|L7MFP6|L7MFP6_9ACAR	N/A	N/A	Uncharacterized protein (Fragment) OS	Rhipicephalus pulchellus PE	TRUE	1.46159	0.19416	75236	69889.8	74886.8	72099	1903.98	7063.44	5346.18	1.07649	0.0320118	0.928941	-0.106341
764	897	tr|L7M660|L7M660_9ACAR	N/A	N/A	Uncharacterized protein OS	Rhipicephalus pulchellus PE	TRUE	1.45761	0.19522	7886.04	5670.03	8805.07	6228.72	2277.9	2014.07	2216.01	1.39083	0.143274	0.718996	-0.475945
765	244	tr|L7MDG1|L7MDG1_9ACAR	N/A	N/A	Putative kh-type splicing regulatory protein (Fragment) OS	Rhipicephalus pulchellus PE	TRUE	1.45244	0.19659	90327.4	77898.8	94555.5	82390	13324.3	10740.3	12428.5	1.15955	0.0642885	0.862406	-0.213562
766	488	tr|L7M2B2|L7M2B2_9ACAR	N/A	N/A	Translocon-associated protein subunit beta OS	Rhipicephalus pulchellus PE	TRUE	-1.4445	0.19872	63304.9	66859.1	62697.7	65718.6	1366.2	4727.49	-3554.14	0.946841	-0.0237228	1.05614	0.0788055
767	592	tr|A0A1E1XNI8|A0A1E1XNI8_9ACAR	N/A	N/A	Putative ras-related small gtpase rho type (Fragment) OS	Amblyomma sculptum PE	TRUE	-1.44038	0.19983	13542.2	16446.4	13591.3	17124.3	1142.57	3867.26	-2904.18	0.823415	-0.0843811	1.21445	0.280308
768	539	tr|L7M2A3|L7M2A3_9ACAR	N/A	N/A	40S ribosomal protein S27 OS	Rhipicephalus pulchellus PE	TRUE	-1.43592	0.20104	175298	271240	131583	265216	88349.9	100259	-95942.2	0.646283	-0.189577	1.54731	0.629763
769	406	tr|A0A224YGA0|A0A224YGA0_9ACAR	N/A	N/A	3-hydroxyacyl-CoA dehydrogenase OS	Rhipicephalus zambeziensis PE	TRUE	1.42415	0.20427	182903	175019	182284	172279	6009.81	9298.32	7883.72	1.04504	0.019135	0.956897	-0.063565
770	469	tr|A0A224Z666|A0A224Z666_9ACAR	N/A	N/A	Phosphoserine aminotransferase OS	Rhipicephalus zambeziensis PE	TRUE	1.42314	0.20455	28659.2	18656.7	28486.1	19245.1	8577.27	11136.7	10002.5	1.53613	0.186429	0.650985	-0.619304
771	893	tr|A0A131XLZ2|A0A131XLZ2_9ACAR	N/A	N/A	Putative phosphoglucomutase (Fragment) OS	Hyalomma excavatum PE	TRUE	1.41228	0.20757	53996.3	33013.7	54019.7	28321.7	747.64	29705.1	20982.7	1.63558	0.213671	0.611406	-0.709798
772	642	tr|F0J941|F0J941_AMBVA	N/A	N/A	Glycoprotein gC1qBP (Fragment) OS	Amblyomma variegatum PE	TRUE	-1.40992	0.20824	34718	41948.6	33997.5	41362.3	9801.74	3021.15	-7230.61	0.827632	-0.0821628	1.20827	0.272939
773	812	tr|A0A224Z1J7|A0A224Z1J7_9ACAR	N/A	N/A	Uncharacterized protein OS	Rhipicephalus zambeziensis PE	TRUE	1.40909	0.20847	8764.14	7095.9	9027.83	7000.72	573.371	2297.36	1668.24	1.2351	0.091702	0.809651	-0.304627
774	108	tr|G3MRE3|G3MRE3_9ACAR	N/A	N/A	NADH dehydrogenase [ubiquinone] flavoprotein 1, mitochondrial OS	Amblyomma maculatum PE	TRUE	-1.40362	0.21001	15329.9	22838.2	18975.9	21111.1	9954.54	3919.91	-7508.31	0.671239	-0.173123	1.48978	0.575102
775	588	tr|A0A224YXN9|A0A224YXN9_9ACAR	N/A	N/A	Elongation factor Ts, mitochondrial OS	Rhipicephalus zambeziensis PE	TRUE	1.39542	0.21235	31566.5	22251.5	30003.4	26805.3	8394.15	10381.9	9315.02	1.41862	0.151867	0.704909	-0.504492
776	77	tr|A0A224YPB3|A0A224YPB3_9ACAR	N/A	N/A	Heat shock protein OS	Rhipicephalus zambeziensis PE	TRUE	1.39535	0.21237	610250	577935	600175	562338	29912.4	35364	32315.1	1.05591	0.0236289	0.947046	-0.0784933
777	836	tr|A0A224Z2U9|A0A224Z2U9_9ACAR	N/A	N/A	Threonyl trna synthetase OS	Rhipicephalus zambeziensis PE	TRUE	1.39438	0.21265	47961.2	41890.1	49195.6	40686.9	4892.41	7203.56	6071.04	1.14493	0.0587781	0.873417	-0.195257
778	885	tr|L7M2J2|L7M2J2_9ACAR	N/A	N/A	Putative methylcrotonoyl-coenzyme a carboxylase 1 alpha OS	Rhipicephalus pulchellus PE	TRUE	-1.38607	0.21504	8238.4	24307.9	8528.05	21534.3	1099.8	23161	-16069.5	0.338919	-0.469905	2.95056	1.56099
779	826	tr|L7M5S1|L7M5S1_9ACAR	N/A	N/A	Putative phosphatidylinositol transfer protein OS	Rhipicephalus pulchellus PE	TRUE	-1.37309	0.21883	14318	25410.4	14059.3	18965.1	1317.62	16103.1	-11092.4	0.563469	-0.24913	1.77472	0.827592
780	604	tr|A0A224YWG1|A0A224YWG1_9ACAR	N/A	N/A	NADH dehydrogenase (Ubiquinone) Fe-S protein 8 OS	Rhipicephalus zambeziensis PE	TRUE	-1.3698	0.2198	154813	169207	156380	176877	3948.89	20642.6	-14394.5	0.91493	-0.0386122	1.09298	0.128267
781	589	tr|A0A224Z3D1|A0A224Z3D1_9ACAR	N/A	N/A	Large subunit ribosomal protein L27e OS	Rhipicephalus zambeziensis PE	TRUE	-1.36392	0.22154	378363	389242	378278	388362	14915.5	5655.55	-10878.5	0.972052	-0.0123105	1.02875	0.0408945
782	633	tr|L7MDE2|L7MDE2_9ACAR	N/A	N/A	Uncharacterized protein (Fragment) OS	Rhipicephalus pulchellus PE	TRUE	1.35999	0.22271	27452	21027.2	27725.7	24604.5	1188.09	9373.33	6424.81	1.30555	0.115793	0.765962	-0.384655
783	866	tr|A0A131Z6C6|A0A131Z6C6_RHIAP	N/A	N/A	Cystatin-A/B OS	Rhipicephalus appendiculatus PE	TRUE	-1.35912	0.22297	10995.6	16847.8	9735.72	16648.1	8233.92	2522.63	-5852.16	0.652645	-0.185323	1.53223	0.615629
784	175	tr|L7M840|L7M840_9ACAR	N/A	N/A	Putative multifunctional chaperone 14-3-3 family OS	Rhipicephalus pulchellus PE	TRUE	1.35744	0.22348	224064	210044	224041	219744	3964.26	20272.1	14019.7	1.06675	0.0280612	0.93743	-0.0932172
785	505	tr|L7M456|L7M456_9ACAR	N/A	N/A	Transcription factor BTF3 OS	Rhipicephalus pulchellus PE	TRUE	1.35522	0.22414	26472.6	24542.8	27147.6	24516.1	2845.43	118.288	1929.76	1.07863	0.0328718	0.927104	-0.109198
786	577	tr|A0A224YDD6|A0A224YDD6_9ACAR	N/A	N/A	Peptidyl-prolyl cis-trans isomerase OS	Rhipicephalus zambeziensis PE	TRUE	1.31898	0.23528	27601.3	24318.7	28910.7	23597.4	3778.65	3240	3282.63	1.13498	0.0549898	0.88107	-0.182672
787	475	tr|A0A1E1X5Y9|A0A1E1X5Y9_9ACAR	N/A	N/A	Sorting nexin OS	Amblyomma aureolatum PE	TRUE	-1.28825	0.24511	7840.28	11440.7	8720.62	10369.4	1967.7	5231.9	-3600.46	0.685295	-0.164122	1.45923	0.545203
788	572	tr|A0A131XCP0|A0A131XCP0_9ACAR	N/A	N/A	Putative ornithine aminotransferase OS	Hyalomma excavatum PE	TRUE	-1.25976	0.25454	32880.8	38280.7	33310.2	36736.1	4391.46	7362.76	-5399.93	0.858939	-0.0660379	1.16423	0.219373
789	832	tr|A0A131YP17|A0A131YP17_RHIAP	N/A	N/A	Reductase OS	Rhipicephalus appendiculatus PE	TRUE	1.24445	0.25974	36269.1	33801.6	37107.1	34061.4	1942.4	3457.32	2467.5	1.073	0.0305995	0.931967	-0.101649
790	297	tr|L7MGY9|L7MGY9_9ACAR	N/A	N/A	Putative heteroproteinous nuclear ribonucleoprotein l (Fragment) OS	Rhipicephalus pulchellus PE	TRUE	1.23251	0.26386	40901.9	30839.1	41921.7	36590.4	3059.16	16039.8	10062.8	1.3263	0.122641	0.753978	-0.407405
791	908	tr|A0A131XD15|A0A131XD15_9ACAR	N/A	N/A	Putative head-elevated expression protein (Fragment) OS	Hyalomma excavatum PE	TRUE	-1.1974	0.27631	24923.6	32539.6	29819	32968	12520.5	2249.06	-7615.99	0.765947	-0.115801	1.30557	0.384684
792	740	tr|A0A131XKI4|A0A131XKI4_9ACAR	N/A	N/A	Putative eukaryotic translation initiation factor 4h OS	Hyalomma excavatum PE	TRUE	1.1898	0.27907	8087.11	5901.64	7582.7	6073.73	1581.25	3315.97	2185.47	1.37032	0.136821	0.729759	-0.454508
793	311	tr|A0A131XEY6|A0A131XEY6_9ACAR	N/A	N/A	Uncharacterized protein OS	Hyalomma excavatum PE	TRUE	1.18779	0.2798	121599	78318.4	124554	79703.8	72651.1	5717.81	43280.5	1.55262	0.191066	0.644072	-0.634707
794	521	tr|A0A224YVE7|A0A224YVE7_9ACAR	N/A	N/A	Protein containing I-set domain OS	Rhipicephalus zambeziensis PE	TRUE	-1.17579	0.28422	28855.3	31435.7	28367.7	30600	3331.85	2857.38	-2580.43	0.917914	-0.037198	1.08943	0.123569
795	742	tr|A0A131XMH8|A0A131XMH8_9ACAR	N/A	N/A	ATP synthase subunit alpha (Fragment) OS	Hyalomma excavatum PE	TRUE	-1.16563	0.288	494945	502707	492466	503979	7237.39	11179.8	-7761.86	0.98456	-0.00675787	1.01568	0.0224492
796	659	tr|A0A224YIB0|A0A224YIB0_9ACAR	N/A	N/A	Uncharacterized protein OS	Rhipicephalus zambeziensis PE	TRUE	1.16412	0.28857	168904	73296.6	170188	8702.2	100410	129994	95607.7	2.30439	0.362557	0.433954	-1.20439
797	462	tr|L7M5K3|L7M5K3_9ACAR	N/A	N/A	Succinate--CoA ligase [ADP/GDP-forming] subunit alpha, mitochondrial OS	Rhipicephalus pulchellus PE	TRUE	1.15587	0.29168	67747.5	42061	86191.7	49932.2	38027.3	23006.9	25686.5	1.6107	0.207014	0.62085	-0.687684
798	546	tr|C9W1P0|C9W1P0_RHISA	N/A	N/A	Ribosomal protein L21 OS	Rhipicephalus sanguineus PE	TRUE	-1.09066	0.31727	74893.8	84057.9	74416.2	86955	4148.7	16284.5	-9164.08	0.890979	-0.0501326	1.12236	0.166537
799	401	tr|A0A224Z9F0|A0A224Z9F0_9ACAR	N/A	N/A	Superoxide dismutase [Cu-Zn] OS	Rhipicephalus zambeziensis PE	TRUE	1.08476	0.31968	151224	119480	127016	121500	58163.4	6520.3	31744.2	1.26569	0.102326	0.790085	-0.33992
800	526	tr|L7M6S0|L7M6S0_9ACAR	N/A	N/A	Putative vesicle coat complex copii subunit sec13 OS	Rhipicephalus pulchellus PE	TRUE	-1.07502	0.32368	39512.4	42986.8	41760	43044.1	6218.44	1764.34	-3474.41	0.919175	-0.0366018	1.08793	0.121588
801	67	tr|L7M8Y4|L7M8Y4_9ACAR	N/A	N/A	Malate dehydrogenase OS	Rhipicephalus pulchellus PE	TRUE	1.07077	0.32544	144558	126508	142704	124690	29669.8	16011.9	18050.4	1.14268	0.0579252	0.875134	-0.192423
802	900	tr|A0A224Z5I7|A0A224Z5I7_9ACAR	N/A	N/A	Peptidyl-prolyl cis-trans isomerase OS	Rhipicephalus zambeziensis PE	TRUE	1.05344	0.3327	13121.6	10006.7	12600.7	9541.53	5762.34	1329.65	3114.9	1.31128	0.117696	0.762613	-0.390977
803	624	tr|C9W1E1|C9W1E1_RHISA	N/A	N/A	ATP synthase E chain OS	Rhipicephalus sanguineus PE	TRUE	1.0373	0.33958	308369	287968	310604	286378	19750.8	34018.7	20401.8	1.07085	0.0297277	0.93384	-0.0987532
804	457	tr|A0A224YS77|A0A224YS77_9ACAR	N/A	N/A	26S proteasome regulatory subunit N5 (Fragment) OS	Rhipicephalus zambeziensis PE	TRUE	1.03586	0.3402	64179.4	62103.6	63863.1	61349.4	3447.47	2043.94	2075.77	1.03342	0.0142787	0.967657	-0.0474328
805	349	tr|A0A224YEU2|A0A224YEU2_9ACAR	N/A	N/A	Serine protease inhibitor OS	Rhipicephalus zambeziensis PE	TRUE	-1.02584	0.34454	61882.9	87603.9	60186.8	88070.6	9068.95	49319.7	-25721.1	0.706394	-0.150953	1.41564	0.501456
806	438	tr|A0A224YIW4|A0A224YIW4_9ACAR	N/A	N/A	NIPSNAP1 protein OS	Rhipicephalus zambeziensis PE	TRUE	-1.01211	0.35055	54286.9	56222.9	53522.5	55884.3	2719.22	2690.96	-1935.98	0.965566	-0.015218	1.03566	0.0505531
807	618	tr|A0A224Z5D4|A0A224Z5D4_9ACAR	N/A	N/A	Very long chain acyl-CoA dehydrogenase OS	Rhipicephalus zambeziensis PE	TRUE	1.0086	0.3521	9233.7	6633.66	10013.1	7831.84	3958.36	3303.48	2600.04	1.39195	0.143623	0.718418	-0.477104
808	615	tr|L7M9E3|L7M9E3_9ACAR	N/A	N/A	AP complex subunit beta OS	Rhipicephalus pulchellus PE	TRUE	1.00394	0.35416	41378	39457.9	41486.2	39791.4	3313.04	1911.93	1920.1	1.04866	0.0206355	0.953596	-0.0685498
809	185	tr|A0A131XG35|A0A131XG35_9ACAR	N/A	N/A	Uncharacterized protein OS	Hyalomma excavatum PE	TRUE	0.999926	0.35595	130929	125898	134018	125258	8166.22	5881.16	5031.4	1.03996	0.0170184	0.961571	-0.056534
810	210	tr|A0A131XK26|A0A131XK26_9ACAR	N/A	N/A	Putative acetyl-coa carboxylase (Fragment) OS	Hyalomma excavatum PE	TRUE	0.995125	0.3581	120866	109928	117518	113570	7347.76	20718.1	10937.7	1.0995	0.0411946	0.909506	-0.136845
811	370	tr|L7M3F2|L7M3F2_9ACAR	N/A	N/A	Putative ribosomal protein l18 OS	Rhipicephalus pulchellus PE	TRUE	-0.991345	0.3598	213887	258685	215455	301346	5139.4	90232.6	-44798.3	0.826823	-0.0825875	1.20945	0.27435
812	533	tr|A0A131Z1Z4|A0A131Z1Z4_RHIAP	N/A	N/A	Uncharacterized protein OS	Rhipicephalus appendiculatus PE	TRUE	-0.983239	0.36346	142749	153020	140067	158057	9962.51	18365.4	-10271.7	0.932874	-0.030177	1.07196	0.100246
813	738	tr|A0A224YYJ8|A0A224YYJ8_9ACAR	N/A	N/A	Membrane protein OS	Rhipicephalus zambeziensis PE	TRUE	0.981169	0.3644	6341.65	4427.24	7135.78	4980.49	2887.82	2624.58	1914.41	1.43242	0.156069	0.698121	-0.518451
814	345	tr|F1PCE5|F1PCE5_CANLF	N/A	N/A	Serpin family A member 1 OS	Canis lupus familiaris GN	TRUE	0.963251	0.37262	389464	365348	385401	370375	46135	19463.3	24116.2	1.06601	0.0277608	0.938078	-0.0922195
815	361	tr|A0A224YG33|A0A224YG33_9ACAR	N/A	N/A	Proteasome subunit beta type OS	Rhipicephalus zambeziensis PE	TRUE	-0.955065	0.37642	105776	119214	109629	118246	18736.1	20995.7	-13437.8	0.88728	-0.0519391	1.12704	0.172538
816	443	tr|A0A224Z8X5|A0A224Z8X5_9ACAR	N/A	N/A	T-complex protein 1 subunit delta OS	Rhipicephalus zambeziensis PE	TRUE	0.953569	0.37712	71013.8	55613.5	71953.1	49823.4	24014.9	21600.7	15400.3	1.27692	0.106162	0.783137	-0.352663
817	466	tr|L7LY05|L7LY05_9ACAR	N/A	N/A	Isocitrate dehydrogenase [NAD] subunit, mitochondrial OS	Rhipicephalus pulchellus PE	TRUE	-0.946432	0.38047	34880.1	39748.4	37066.6	41649.7	6147.68	8248.77	-4868.29	0.877522	-0.0567418	1.13957	0.188492
818	188	tr|A0A224YLQ5|A0A224YLQ5_9ACAR	N/A	N/A	26s proteasome regulatory complex atpase rpt1 OS	Rhipicephalus zambeziensis PE	TRUE	0.938687	0.38412	145253	129948	146339	132950	4388.19	32312.2	15304.7	1.11778	0.0483547	0.894634	-0.160631
819	820	tr|A0A131YH18|A0A131YH18_RHIAP	N/A	N/A	Uncharacterized protein OS	Rhipicephalus appendiculatus PE	TRUE	-0.902975	0.40134	13621.9	17363.7	13527.3	20832.8	877.125	8241.15	-3741.79	0.784505	-0.105404	1.27469	0.350146
820	127	tr|L7M7D6|L7M7D6_9ACAR	N/A	N/A	Putative biosynthetic process OS	Rhipicephalus pulchellus PE	TRUE	-0.900007	0.40279	245024	271524	245453	267008	46100.9	36638.5	-26499.4	0.902405	-0.0445985	1.10815	0.148153
821	654	tr|A0A131YL25|A0A131YL25_RHIAP	N/A	N/A	Methylenetetrahydrofolate dehydrogenase (NADP+) / methenyltetrahydrofolate cyclohydrolase OS	Rhipicephalus appendiculatus PE	TRUE	0.899174	0.4032	5174.74	4137.92	5122.79	3966.8	630.018	2218.43	1036.82	1.25057	0.0971063	0.799639	-0.32258
822	407	tr|L7MB37|L7MB37_9ACAR	N/A	N/A	Putative actin OS	Rhipicephalus pulchellus PE	TRUE	0.898292	0.40364	63758.2	60678.5	63332.4	60947.8	1343.57	6723.78	3079.66	1.05075	0.0215009	0.951698	-0.0714246
823	670	tr|L7MF21|L7MF21_9ACAR	N/A	N/A	Putative f-actin capping protein alpha subunit (Fragment) OS	Rhipicephalus pulchellus PE	TRUE	-0.867926	0.41879	21136.6	22641.3	20787.1	22902.8	1360.93	3189.11	-1504.7	0.933542	-0.0298663	1.07119	0.0992139
824	637	tr|L7M7F9|L7M7F9_9ACAR	N/A	N/A	Putative integrin-linked kinase OS	Rhipicephalus pulchellus PE	TRUE	-0.855314	0.42521	36923.3	47455.2	47056.2	48536.4	24355.7	3644.69	-10531.9	0.778067	-0.108983	1.28524	0.362034
825	806	tr|B7PDK2|B7PDK2_IXOSC	N/A	N/A	Cuticular protein, putative OS	Ixodes scapularis GN	TRUE	-0.847151	0.4294	90785.3	94373.9	90616.2	94062.8	4487.48	7186.19	-3588.63	0.961974	-0.0168365	1.03953	0.0559297
826	236	tr|A0A131YL94|A0A131YL94_RHIAP	N/A	N/A	Sodium/potassium-transporting ATPase subunit alpha OS	Rhipicephalus appendiculatus PE	TRUE	-0.839282	0.43347	111953	124403	111469	115843	14438.6	25916.7	-12449.6	0.899925	-0.0457935	1.1112	0.152123
827	535	tr|A0A131XMF7|A0A131XMF7_9ACAR	N/A	N/A	Alpha-1,4 glucan phosphorylase (Fragment) OS	Hyalomma excavatum PE	TRUE	-0.835315	0.43553	221374	229908	222990	227414	16232.1	12408	-8533.31	0.962884	-0.0164261	1.03855	0.0545665
828	660	tr|G3MJ15|G3MJ15_9ACAR	N/A	N/A	Uncharacterized protein (Fragment) OS	Amblyomma maculatum PE	TRUE	-0.798904	0.4548	5545.12	7400.95	5990.76	7499.42	2426.35	3962.03	-1855.84	0.749244	-0.125377	1.33468	0.416493
829	582	tr|A0A131XCV1|A0A131XCV1_9ACAR	N/A	N/A	Putative conserved secreted protein OS	Hyalomma excavatum PE	TRUE	0.789205	0.46003	63093	36658.7	63225.4	3769.77	4941.54	66807.2	26434.3	1.72109	0.235804	0.581027	-0.783323
830	641	tr|L7M669|L7M669_9ACAR	N/A	N/A	Histone H2A OS	Rhipicephalus pulchellus PE	TRUE	-0.779729	0.46519	104415	236929	91383.7	75975.4	99669.9	324956	-132514	0.4407	-0.355857	2.26912	1.18213
831	870	tr|L7LTU1|L7LTU1_9ACAR	N/A	N/A	Putative tick salivary serpin OS	Rhipicephalus pulchellus PE	TRUE	-0.761232	0.47536	12396.1	19816.9	11562.8	11231.1	5515.07	18700.6	-7420.83	0.625531	-0.203751	1.59864	0.676848
832	818	tr|A0A131YXX9|A0A131YXX9_RHIAP	N/A	N/A	Ankyrin OS	Rhipicephalus appendiculatus PE	TRUE	-0.757634	0.47736	14916	20035	17012.5	24137.6	4885.97	12598.8	-5118.97	0.744498	-0.128136	1.34319	0.42566
833	201	tr|L7LZL3|L7LZL3_9ACAR	N/A	N/A	Putative tho complex subunit 4 OS	Rhipicephalus pulchellus PE	TRUE	-0.756916	0.47776	59228.5	67798	64382.2	65885.1	21959.3	5522.53	-8569.47	0.873603	-0.0586859	1.14468	0.19495
834	584	tr|V5HJL3|V5HJL3_IXORI	N/A	N/A	Putative vacuolar sorting protein vps1 dynamin OS	Ixodes ricinus PE	TRUE	-0.756014	0.47826	33701.4	43464.9	27763.7	43193.7	13096.4	22262.6	-9763.56	0.775369	-0.110491	1.28971	0.367044
835	684	tr|L7MB29|L7MB29_9ACAR	N/A	N/A	Putative transcription factor nfat subunit nf45 OS	Rhipicephalus pulchellus PE	TRUE	0.75492	0.47887	40207.2	35336.9	42384.9	32329.9	6793.1	10969.9	4870.32	1.13783	0.0560757	0.878869	-0.186279
836	762	tr|A0A023G4A7|A0A023G4A7_9ACAR	N/A	N/A	Putative cytochrome c1 OS	Amblyomma triste PE	TRUE	0.734035	0.49061	92303.4	67333.9	110623	80313.2	46499.2	49662.6	24969.5	1.37083	0.136984	0.729485	-0.45505
837	272	tr|L7MIQ1|L7MIQ1_9ACAR	N/A	N/A	Putative 26s proteasome regulatory complex subunit (Fragment) OS	Rhipicephalus pulchellus PE	TRUE	0.729896	0.49295	155127	146932	162420	150666	17268.3	14354.9	8195.17	1.05578	0.0235715	0.947171	-0.0783029
838	724	tr|E2QVU9|E2QVU9_CANLF	N/A	N/A	Biliverdin reductase B OS	Canis lupus familiaris GN	TRUE	-0.724569	0.49599	797.086	1177.64	861.17	919.221	599.967	862.222	-380.552	0.676852	-0.169507	1.47743	0.563088
839	601	tr|L7M191|L7M191_9ACAR	N/A	N/A	Putative ubiquitin-conjugating enzyme e2 OS	Rhipicephalus pulchellus PE	TRUE	0.721689	0.49763	32236.7	30877.2	31449.1	30886.6	2334.25	2957.43	1359.53	1.04403	0.0187131	0.957827	-0.0621636
840	118	tr|A0A131Z9H5|A0A131Z9H5_RHIAP	N/A	N/A	Laminin, beta 1 (Fragment) OS	Rhipicephalus appendiculatus PE	TRUE	0.684417	0.51926	319971	312377	318528	307267	13323.8	17745.8	7593.92	1.02431	0.0104314	0.976267	-0.0346525
841	451	tr|B3GV23|B3GV23_RHIMP	N/A	N/A	Succinate-semialdehyde dehydrogenase OS	Rhipicephalus microplus GN	TRUE	0.673234	0.52587	40875.7	36065.6	40869.6	40413.3	1086.83	14248	4810.06	1.13337	0.0543716	0.882325	-0.180619
842	566	tr|A0A023FXB7|A0A023FXB7_9ACAR	N/A	N/A	Tubulin beta chain OS	Amblyomma parvum PE	TRUE	0.667106	0.52951	48064.3	46798.3	48335.7	45935.2	1682.34	3402.4	1266.04	1.02705	0.0115929	0.97366	-0.0385107
843	189	tr|L7MI50|L7MI50_9ACAR	N/A	N/A	Putative glycine rich protein (Fragment) OS	Rhipicephalus pulchellus PE	TRUE	-0.660639	0.53337	173884	201582	144837	194073	75769.7	35920.5	-27698.3	0.862596	-0.0641927	1.15929	0.213244
844	789	tr|L7MKU7|L7MKU7_9ACAR	N/A	N/A	Putative 3-methylcrotonyl-coa carboxylase non-biotin (Fragment) OS	Rhipicephalus pulchellus PE	TRUE	0.658108	0.53489	16117.9	14903.5	16026.6	15407.1	811.883	3600.34	1214.45	1.08149	0.0340217	0.924652	-0.113018
845	689	tr|A0A1E1X5E0|A0A1E1X5E0_9ACAR	N/A	N/A	Proteasome subunit beta type OS	Amblyomma aureolatum PE	TRUE	0.650403	0.53952	89644.9	85968.6	89644.7	87330.5	2559.37	11011	3676.25	1.04276	0.0181855	0.958991	-0.0604108
846	657	tr|A0A224Z4D0|A0A224Z4D0_9ACAR	N/A	N/A	Zinc finger RNA-binding protein OS	Rhipicephalus zambeziensis PE	TRUE	-0.632815	0.5502	7406.02	8929.21	7199.84	10880.3	466.914	4791.31	-1523.19	0.829415	-0.0812281	1.20567	0.269834
847	679	tr|A0A034WZ74|A0A034WZ74_RHIMP	N/A	N/A	Metabotropic glutamate receptor_1 (Fragment) OS	Rhipicephalus microplus PE	TRUE	0.631154	0.55121	4273.46	3324.84	5073.24	3572.76	2085.52	2164.83	948.617	1.28531	0.109009	0.778021	-0.362119
848	583	tr|A0A224YTH4|A0A224YTH4_9ACAR	N/A	N/A	Microtubule associated complex OS	Rhipicephalus zambeziensis PE	TRUE	-0.630381	0.55168	57241.5	66485.2	50396.4	55109.3	16748.8	24074.5	-9243.75	0.860965	-0.0650144	1.16149	0.215973
[truncated: 60 more rows]

## Sheet: OVER SG I
Row	Index	Peak Name	m/z	Ret. Time	Group	SPECIES	Use	t-value	p-value	Mean 1	Mean 2	Median 1	Median 2	Sigma 1	Sigma 2	Delta	Fold Change	Log (Fold Change)	Fold Change (RsJ/RsS)	Log (Fold Change)
[truncated: 287 more rows]

[truncated: 1 more sheets: UNDER SG I]
