# Supplementary material for: Comparative Proteomic Analysis of Rhipicephalus sanguineus sensu lato (Acari: Ixodidae) Tropical and Temperate Lineages: Uncovering Differences During Ehrlichia canis Infection
Source: Front Cell Infect Microbiol. 2021 Jan 29;10:611113. doi: 10.3389/fcimb.2020.611113 (PMC7879575; doi:10.3389/fcimb.2020.611113)
Supplement: Supplementary Table 4 — Analysis of the mialome of R. sanguineus tropical vs. temperate lineage in E. canis infected condition. [file Table_4.xlsx]

## Sheet: All MG proteins
									RsS	RsJ
Row	Index	Peak Name	m/z	Ret. Time	Group	Use	t-value	p-value	Mean 1	Mean 2	Median 1	Median 2	Sigma 1	Sigma 2	Delta	Fold Change	Log (Fold Change)	Fold Change (RsJ/RsS)	Log (Fold Change)
1	6	tr|J9P430|J9P430_CANLF	N/A	N/A	Transferrin OS=Canis lupus familiaris GN=TF PE=3 SV=1	TRUE	130.335	1.3758e-11	2.39532e+07	2.29158e+06	2.38985e+07	2.37764e+06	273725	188586	2.16616e+07	10.4527	1.01923	0.095669	-3.38581
2	359	tr|L7M046|L7M046_9ACAR	N/A	N/A	Putative cuticular protein OS=Rhipicephalus pulchellus PE=2 SV=1	TRUE	-111.675	3.4756e-11	421850	1.67643e+06	420549	1.67797e+06	6530.13	21498.6	-1.25458e+06	0.251636	-0.599227	3.97399	1.99059
3	885	tr|A0A131XQY3|A0A131XQY3_9ACAR	N/A	N/A	Putative grp-3 497 glycine rich family OS=Hyalomma excavatum PE=2 SV=1	TRUE	-108.698	4.087e-11	6415.92	560376	4053.64	561431	6567.74	7794.6	-553960	0.0114493	-1.94122	87.3415	6.4486
4	221	tr|F1PCE5|F1PCE5_CANLF	N/A	N/A	Serpin family A member 1 OS=Canis lupus familiaris GN=SERPINA1 PE=3 SV=2	TRUE	92.3093	1.089e-10	6.18782e+06	698827	6.23627e+06	696282	118402	11153.2	5.48899e+06	8.85457	0.947168	0.112936	-3.14642
5	147	tr|A0A224Z4Q3|A0A224Z4Q3_9ACAR	N/A	N/A	40S ribosomal protein SA OS=Rhipicephalus zambeziensis PE=3 SV=1	TRUE	-84.6462	1.8311e-10	1.13433e+06	2.61049e+06	1.13728e+06	2.60925e+06	30531.3	16862.5	-1.47616e+06	0.434527	-0.361983	2.30135	1.20248
6	76	tr|A0A224YPB3|A0A224YPB3_9ACAR	N/A	N/A	Heat shock protein OS=Rhipicephalus zambeziensis PE=3 SV=1	TRUE	-82.5008	2.1358e-10	881375	2.66927e+06	879008	2.665e+06	20205.6	38344.7	-1.7879e+06	0.330193	-0.481232	3.02853	1.59862
7	241	tr|A0A131XAX9|A0A131XAX9_9ACAR	N/A	N/A	Putative nadh-ubiquinone oxidoreductase ndufs1/75 kDa subunit OS=Hyalomma excavatum PE=2 SV=1	TRUE	-80.0937	2.5506e-10	254428	622637	256070	620807	4239.01	8158.99	-368209	0.408629	-0.38867	2.4472	1.29113
8	588	tr|Q4PM27|Q4PM27_IXOSC	N/A	N/A	Ribosomal protein L11 OS=Ixodes scapularis GN=8025561 PE=2 SV=1	TRUE	-79.5332	2.6603e-10	546518	1.66377e+06	546223	1.66275e+06	20168.4	19559.8	-1.11725e+06	0.328481	-0.48349	3.04432	1.60612
9	862	tr|B7P5Q1|B7P5Q1_IXOSC	N/A	N/A	Cuticle protein, putative OS=Ixodes scapularis GN=8024995 PE=4 SV=1	TRUE	-77.7524	3.0471e-10	40413.8	318191	40854	317125	3509.07	6224.13	-277777	0.127011	-0.896157	7.87331	2.97697
10	356	tr|Q4PM42|Q4PM42_IXOSC	N/A	N/A	Ribosomal protein S15Aa OS=Ixodes scapularis PE=2 SV=1	TRUE	-73.4567	4.284e-10	696300	1.50491e+06	697875	1.50693e+06	9002.98	20091.1	-808611	0.462685	-0.334714	2.1613	1.1119
11	312	tr|V5I100|V5I100_IXORI	N/A	N/A	Putative 60s ribosomal protein l23 apis mellifera (Fragment) OS=Ixodes ricinus PE=2 SV=1	TRUE	-71.92	4.8628e-10	1.12372e+06	2.9968e+06	1.12277e+06	2.99556e+06	36292.6	37362.9	-1.87308e+06	0.374974	-0.425998	2.66685	1.41514
12	95	tr|L7MAK0|L7MAK0_9ACAR	N/A	N/A	Putative acetyl-coa hydrolase OS=Rhipicephalus pulchellus PE=2 SV=1	TRUE	-70.9837	5.2601e-10	813001	1.8529e+06	811773	1.86041e+06	15289.2	24994.2	-1.0399e+06	0.438772	-0.357761	2.27909	1.18846
13	670	tr|A0A131YMZ1|A0A131YMZ1_RHIAP	N/A	N/A	Metastriate one of each protein family OS=Rhipicephalus appendiculatus PE=4 SV=1	TRUE	-70.8837	5.3047e-10	4916.85	541805	4376.73	539800	3788.24	14667.1	-536888	0.00907493	-2.04216	110.194	6.7839
14	377	tr|E2R5U8|E2R5U8_CANLF	N/A	N/A	Transthyretin OS=Canis lupus familiaris GN=TTR PE=3 SV=1	TRUE	70.7628	5.3593e-10	801174	137256	800710	139245	12249.3	14215	663918	5.83709	0.766197	0.171318	-2.54525
15	212	tr|F1PBK6|F1PBK6_CANLF	N/A	N/A	Carbonic anhydrase 1 OS=Canis lupus familiaris GN=CA1 PE=4 SV=2	TRUE	70.6166	5.4261e-10	1.85967e+06	480531	1.8672e+06	473911	30759.5	24073.2	1.37914e+06	3.87002	0.587714	0.258396	-1.95234
16	1026	tr|A0A0A7DS60|A0A0A7DS60_RHIMP	N/A	N/A	Phosphoglucomutase (Fragment) OS=Rhipicephalus microplus PE=2 SV=1	TRUE	70.4932	5.4833e-10	97235.8	12951	97200.2	12406.8	1857.04	1506.54	84284.8	7.50798	0.875523	0.133192	-2.90843
17	273	tr|A0A131YXW9|A0A131YXW9_RHIAP	N/A	N/A	Beat protein like 1 OS=Rhipicephalus appendiculatus PE=4 SV=1	TRUE	69.4424	5.9998e-10	670547	259208	671723	259980	10739.4	5001.52	411339	2.58691	0.412781	0.386562	-1.37123
18	288	tr|L7M7R7|L7M7R7_9ACAR	N/A	N/A	Putative atp synthase subunit b OS=Rhipicephalus pulchellus PE=2 SV=1	TRUE	-68.0882	6.7515e-10	536106	1.03744e+06	532972	1.03779e+06	14096.7	4258.95	-501335	0.516758	-0.286713	1.93514	0.952439
19	142	tr|A0A224YZR0|A0A224YZR0_9ACAR	N/A	N/A	Solute carrier family 25 (Mitochondrial adenine nucleotide translocator) member 4/5/6/31 OS=Rhipicephalus zambeziensis PE=3 SV=1	TRUE	-67.1016	7.3686e-10	584843	1.91735e+06	582903	1.92264e+06	31672.9	23962.3	-1.3325e+06	0.305027	-0.515661	3.2784	1.71299
20	344	tr|A0A224YB78|A0A224YB78_9ACAR	N/A	N/A	Lipocalin OS=Rhipicephalus zambeziensis PE=4 SV=1	TRUE	66.0017	8.1359e-10	753354	163794	752498	164560	17073.7	5258.11	589560	4.59941	0.662702	0.217419	-2.20145
21	148	tr|E2QUV3|E2QUV3_CANLF	N/A	N/A	Alpha 2-HS glycoprotein OS=Canis lupus familiaris GN=AHSG PE=3 SV=2	TRUE	65.6254	8.4195e-10	8.21266e+06	936410	8.24239e+06	931105	221242	15019.3	7.27625e+06	8.77037	0.943018	0.11402	-3.13264
22	532	tr|C9W1E7|C9W1E7_RHISA	N/A	N/A	Cement-like antigen OS=Rhipicephalus sanguineus PE=2 SV=1	TRUE	-64.2591	9.5508e-10	11504.7	1.38273e+06	11266.5	1.37382e+06	1452.27	42653.3	-1.37123e+06	0.0083203	-2.07986	120.188	6.90915
23	742	tr|A0A224Z3J0|A0A224Z3J0_9ACAR	N/A	N/A	Ribosomal protein l35a OS=Rhipicephalus zambeziensis PE=4 SV=1	TRUE	-64.2421	9.566e-10	228227	591299	226427	591130	6328.69	9365.41	-363072	0.385975	-0.413441	2.59084	1.37342
24	151	tr|A0A131Z9A0|A0A131Z9A0_RHIAP	N/A	N/A	BIGH3 (Fragment) OS=Rhipicephalus appendiculatus PE=4 SV=1	TRUE	-62.3956	1.1393e-09	129667	754948	126777	756715	7540.86	18569.8	-625282	0.171756	-0.765089	5.82223	2.54157
25	275	tr|L7MHR9|L7MHR9_9ACAR	N/A	N/A	Putative 60s ribosomal protein l23 (Fragment) OS=Rhipicephalus pulchellus PE=2 SV=1	TRUE	-62.1278	1.169e-09	773510	2.2114e+06	779990	2.21531e+06	41788.8	19907.3	-1.43789e+06	0.349782	-0.456202	2.85892	1.51547
26	226	tr|L7M6I8|L7M6I8_9ACAR	N/A	N/A	Putative ribosomal protein s13 OS=Rhipicephalus pulchellus PE=2 SV=1	TRUE	-62.0542	1.1773e-09	482695	980110	478403	980071	9858.54	12642.1	-497415	0.492491	-0.307602	2.03049	1.02183
27	43	tr|F1P841|F1P841_CANLF	N/A	N/A	GC, vitamin D binding protein OS=Canis lupus familiaris GN=GC PE=3 SV=2	TRUE	61.2147	1.2775e-09	4.78083e+06	520104	4.78675e+06	519816	138830	10217.6	4.26072e+06	9.19206	0.963413	0.10879	-3.20039
28	712	tr|G3MPE3|G3MPE3_9ACAR	N/A	N/A	Peptidylprolyl isomerase OS=Amblyomma maculatum PE=2 SV=1	TRUE	60.8198	1.328e-09	395925	195074	393906	195704	5374.58	3838.9	200851	2.02961	0.307413	0.492705	-1.0212
29	1035	tr|A0A224YSS4|A0A224YSS4_9ACAR	N/A	N/A	Erythrocyte membrane protein 1 OS=Rhipicephalus zambeziensis PE=4 SV=1	TRUE	-60.4468	1.3778e-09	131885	413908	129637	415997	5187.44	7756.48	-282023	0.318634	-0.496707	3.13839	1.65003
30	990	tr|A0A1E1XIJ1|A0A1E1XIJ1_9ACAR	N/A	N/A	Putative secreted salivary gland protein OS=Amblyomma aureolatum PE=2 SV=1	TRUE	-60.0764	1.4295e-09	44005.4	161305	44871.7	160624	3329.38	2040.67	-117300	0.272809	-0.564142	3.66557	1.87404
31	648	tr|G3MRM3|G3MRM3_9ACAR	N/A	N/A	Uncharacterized protein OS=Amblyomma maculatum PE=2 SV=1	TRUE	-58.5925	1.6606e-09	395976	1.68636e+06	411051	1.68643e+06	34143.1	27826.5	-1.29039e+06	0.234811	-0.629282	4.25875	2.09043
32	27	tr|F1PW65|F1PW65_CANLF	N/A	N/A	Fibrinogen beta chain OS=Canis lupus familiaris GN=FGB PE=4 SV=2	TRUE	57.5569	1.8478e-09	2.75253e+06	411563	2.72352e+06	406509	75660.1	29873.9	2.34097e+06	6.68799	0.825295	0.149522	-2.74157
33	574	tr|L7MAQ1|L7MAQ1_9ACAR	N/A	N/A	Putative cytochrome b-c1 complex subunit 2 mitochondrial OS=Rhipicephalus pulchellus PE=2 SV=1	TRUE	-56.6146	2.0399e-09	182559	508178	184114	507441	6353.39	9589.27	-325620	0.359241	-0.444614	2.78364	1.47697
34	943	tr|Q4PM83|Q4PM83_IXOSC	N/A	N/A	Ribosomal protein L27A OS=Ixodes scapularis GN=8035875 PE=2 SV=1	TRUE	-55.0567	2.411e-09	86339.6	572450	84904.5	570858	4686.91	17025.2	-486110	0.150825	-0.821527	6.63021	2.72906
35	19	tr|L7MAA0|L7MAA0_9ACAR	N/A	N/A	ATP synthase subunit alpha OS=Rhipicephalus pulchellus PE=2 SV=1	TRUE	-54.049	2.693e-09	202714	705342	202104	706816	14846.9	11202.3	-502628	0.287398	-0.541516	3.47949	1.79888
36	104	tr|A0A224YSG5|A0A224YSG5_9ACAR	N/A	N/A	Large subunit ribosomal protein L5e OS=Rhipicephalus zambeziensis PE=3 SV=1	TRUE	-53.2612	2.9406e-09	619473	1.11848e+06	617826	1.11541e+06	9714.54	16023.1	-499003	0.553855	-0.256604	1.80553	0.852421
37	351	tr|L7MJ32|L7MJ32_9ACAR	N/A	N/A	Putative ribosomal protein l17 (Fragment) OS=Rhipicephalus pulchellus PE=2 SV=1	TRUE	-51.8346	3.4597e-09	404965	1.22497e+06	411999	1.21611e+06	17375.8	26440.9	-820004	0.330592	-0.480708	3.02488	1.59688
38	171	tr|A0A224Z6N2|A0A224Z6N2_9ACAR	N/A	N/A	Regulatory protein mlp OS=Rhipicephalus zambeziensis PE=4 SV=1	TRUE	-51.8192	3.4659e-09	4.81021e+06	1.32633e+07	4.82802e+06	1.32625e+07	209603	250014	-8.45306e+06	0.362672	-0.440486	2.75731	1.46326
39	355	tr|A0A224YNP1|A0A224YNP1_9ACAR	N/A	N/A	Glycine rich cell wall structural protein OS=Rhipicephalus zambeziensis PE=4 SV=1	TRUE	-51.6238	3.5452e-09	220205	476927	219080	476531	8771.21	4688.97	-256722	0.461716	-0.335625	2.16583	1.11492
40	427	tr|A0A131YDG8|A0A131YDG8_RHIAP	N/A	N/A	Cuticular protein OS=Rhipicephalus appendiculatus PE=4 SV=1	TRUE	-51.5884	3.5598e-09	789136	4.52718e+06	787444	4.56318e+06	50101	135982	-3.73804e+06	0.174311	-0.758676	5.73688	2.52027
41	636	tr|A0A131XTW8|A0A131XTW8_IXORI	N/A	N/A	Putative muscle m-line assembly protein unc-89 (Fragment) OS=Ixodes ricinus PE=2 SV=1	TRUE	-51.4679	3.61e-09	89652	245173	89574.4	244030	2234.91	5614.97	-155521	0.365669	-0.436912	2.73472	1.45139
42	269	tr|V5HMI8|V5HMI8_IXORI	N/A	N/A	40S ribosomal protein S8 (Fragment) OS=Ixodes ricinus PE=2 SV=1	TRUE	-51.3063	3.6786e-09	1.01407e+06	2.10064e+06	1.006e+06	2.1039e+06	35168.1	23606.9	-1.08658e+06	0.48274	-0.316286	2.07151	1.05068
43	70	tr|L7LTQ8|L7LTQ8_9ACAR	N/A	N/A	Putative heteroproteinous nuclear ribonucleoprotein at 87f OS=Rhipicephalus pulchellus PE=2 SV=1	TRUE	-51.1494	3.7467e-09	2.93605e+06	7.35229e+06	2.94809e+06	7.35865e+06	142075	98148.4	-4.41624e+06	0.399338	-0.39866	2.50415	1.32432
44	587	tr|E3UCD8|E3UCD8_HYAAA	N/A	N/A	Ribosomal protein L24 OS=Hyalomma anatolicum anatolicum PE=2 SV=1	TRUE	-50.0324	4.2763e-09	420834	1.11406e+06	419222	1.10901e+06	21157.5	17895.9	-693225	0.377748	-0.422798	2.64727	1.4045
45	419	tr|J9P028|J9P028_CANLF	N/A	N/A	Glutathione peroxidase OS=Canis lupus familiaris GN=GPX3 PE=3 SV=1	TRUE	49.9511	4.3181e-09	1.75289e+06	224158	1.7404e+06	225483	59703.3	13493.6	1.52873e+06	7.81989	0.893201	0.127879	-2.96715
46	115	tr|A0A131YXB1|A0A131YXB1_RHIAP	N/A	N/A	ATP-dependent RNA helicase DDX3X OS=Rhipicephalus appendiculatus PE=3 SV=1	TRUE	-49.95	4.3187e-09	232875	557863	230426	556561	9241.99	9160.31	-324988	0.417442	-0.379404	2.39554	1.26035
47	869	tr|L7M7G4|L7M7G4_9ACAR	N/A	N/A	Putative actin-binding cytoskeleton protein filamin OS=Rhipicephalus pulchellus PE=2 SV=1	TRUE	49.5431	4.5354e-09	207325	51851.4	209107	51688.1	5997.95	1848.39	155474	3.99845	0.601892	0.250097	-1.99944
48	939	tr|A0A0C9SF82|A0A0C9SF82_AMBAM	N/A	N/A	Putative tick til 20 OS=Amblyomma americanum PE=2 SV=1	TRUE	49.4797	4.5703e-09	131523	8606.2	131200	8175.77	3244.5	3762.69	122917	15.2823	1.18419	0.065435	-3.93379
49	397	tr|G3MSP2|G3MSP2_9ACAR	N/A	N/A	Uncharacterized protein OS=Amblyomma maculatum PE=2 SV=1	TRUE	-49.3873	4.6218e-09	465311	964666	469427	959662	9529.89	17835.7	-499355	0.482354	-0.316634	2.07316	1.05183
50	5	tr|F2Z4Q6|F2Z4Q6_CANLF	N/A	N/A	Serum albumin OS=Canis lupus familiaris GN=ALB PE=3 SV=1	TRUE	49.2842	4.68e-09	1.25179e+06	155147	1.23691e+06	154941	44310.9	4128.04	1.09664e+06	8.06842	0.906789	0.12394	-3.01229
51	279	tr|E2R8Z5|E2R8Z5_CANLF	N/A	N/A	Keratin 5 OS=Canis lupus familiaris GN=KRT5 PE=3 SV=2	TRUE	-49.2568	4.6956e-09	208104	319801	207928	320453	3196.39	3217.46	-111697	0.650729	-0.1866	1.53674	0.619871
52	225	tr|J9NSF9|J9NSF9_CANLF	N/A	N/A	Prothrombin OS=Canis lupus familiaris GN=F2 PE=3 SV=1	TRUE	48.939	4.8811e-09	741354	88506.3	744107	80987.6	17516.6	20124.4	652848	8.37629	0.923052	0.119385	-3.06631
53	624	tr|A0A1E1X068|A0A1E1X068_9ACAR	N/A	N/A	Cystatin (Fragment) OS=Amblyomma aureolatum PE=2 SV=1	TRUE	48.2056	5.343e-09	633803	15574.8	631974	13708.5	25308.4	4170.39	618229	40.6942	1.60953	0.0245735	-5.34675
54	125	tr|G3MMG2|G3MMG2_9ACAR	N/A	N/A	40S ribosomal protein S4 OS=Amblyomma maculatum PE=2 SV=1	TRUE	-47.8792	5.5647e-09	1.44938e+06	4.1204e+06	1.4498e+06	4.11113e+06	55693.6	96679.1	-2.67102e+06	0.351757	-0.453758	2.84288	1.50735
55	948	tr|L7MFW4|L7MFW4_9ACAR	N/A	N/A	Putative asparaginase (Fragment) OS=Rhipicephalus pulchellus PE=2 SV=1	TRUE	47.6532	5.7246e-09	72717.8	11434.2	72041.5	11495.1	2355.1	1033.95	61283.6	6.3597	0.803436	0.15724	-2.66896
56	903	tr|A0A0C9R303|A0A0C9R303_AMBAM	N/A	N/A	Putative hnrnp-l/ptb/hephaestus splicing factor family (Fragment) OS=Amblyomma americanum PE=2 SV=1	TRUE	-47.5969	5.7653e-09	61298.5	202553	61369.2	203985	3220.8	4985.61	-141255	0.302629	-0.51909	3.30438	1.72438
57	168	tr|A0A224YGJ1|A0A224YGJ1_9ACAR	N/A	N/A	Acetyl-CoA acyltransferase OS=Rhipicephalus zambeziensis PE=3 SV=1	TRUE	-47.5674	5.7867e-09	888592	2.72174e+06	870113	2.70449e+06	67847.2	36571.3	-1.83315e+06	0.326479	-0.486145	3.06299	1.61494
58	199	tr|A0A224Z4I9|A0A224Z4I9_9ACAR	N/A	N/A	Mitochondrial-processing peptidase subunit beta OS=Rhipicephalus zambeziensis PE=3 SV=1	TRUE	-47.3044	5.982e-09	446903	1.07843e+06	442815	1.07863e+06	18046.3	19678.7	-631526	0.414402	-0.382578	2.41312	1.2709
59	58	tr|F1P8G0|F1P8G0_CANLF	N/A	N/A	Fibrinogen gamma chain OS=Canis lupus familiaris GN=FGG PE=4 SV=2	TRUE	47.2602	6.0155e-09	4.7287e+06	599355	4.78752e+06	600474	171403	34036.4	4.12934e+06	7.88964	0.897057	0.126749	-2.97996
60	623	tr|A0A224YIB0|A0A224YIB0_9ACAR	N/A	N/A	Uncharacterized protein OS=Rhipicephalus zambeziensis PE=4 SV=1	TRUE	46.785	6.3906e-09	478489	10932.9	469686	10286.5	19640.3	3708.91	467556	43.7661	1.64114	0.0228487	-5.45174
61	35	tr|H9GWY1|H9GWY1_CANLF	N/A	N/A	Inter-alpha-trypsin inhibitor heavy chain family member 4 OS=Canis lupus familiaris GN=ITIH4 PE=4 SV=2	TRUE	45.5121	7.5378e-09	2.62744e+06	426614	2.61631e+06	432366	74657.6	61480.4	2.20083e+06	6.15883	0.789498	0.162369	-2.62266
62	150	tr|A0A131XI55|A0A131XI55_9ACAR	N/A	N/A	Putative f0f1-type atp synthase gamma subunit OS=Hyalomma excavatum PE=2 SV=1	TRUE	-45.2713	7.781e-09	450564	1.47743e+06	452139	1.47988e+06	4019.54	45186.8	-1.02687e+06	0.304964	-0.515751	3.27908	1.71329
63	357	tr|A0A224Z1P8|A0A224Z1P8_9ACAR	N/A	N/A	Large subunit ribosomal protein L22e OS=Rhipicephalus zambeziensis PE=4 SV=1	TRUE	-45.0948	7.965e-09	1.73272e+06	4.08001e+06	1.73214e+06	4.0903e+06	73039.3	74182.9	-2.34729e+06	0.424685	-0.371934	2.35469	1.23554
64	443	tr|G3MNV3|G3MNV3_9ACAR	N/A	N/A	Uncharacterized protein OS=Amblyomma maculatum PE=2 SV=1	TRUE	-45.0532	8.0091e-09	506683	1.24983e+06	511248	1.25432e+06	25314.5	21154	-743144	0.405403	-0.392114	2.46668	1.30257
65	244	tr|L7M5X2|L7M5X2_9ACAR	N/A	N/A	Putative ribosomal protein OS=Rhipicephalus pulchellus PE=2 SV=1	TRUE	-44.7227	8.3699e-09	520437	1.79252e+06	517977	1.79194e+06	49361.3	28278.6	-1.27209e+06	0.290338	-0.537097	3.44427	1.7842
66	954	tr|L7M062|L7M062_9ACAR	N/A	N/A	Putative acyl-coa-binding protein OS=Rhipicephalus pulchellus PE=2 SV=1	TRUE	44.6366	8.467e-09	134312	38075.2	135385	38012.8	4042.89	1499.5	96236.8	3.52755	0.547473	0.283483	-1.81867
67	272	tr|E2R9B6|E2R9B6_CANLF	N/A	N/A	Fetuin B OS=Canis lupus familiaris GN=FETUB PE=4 SV=1	TRUE	44.6284	8.4764e-09	510540	76709.5	511835	77965.3	14461.7	12994.1	433830	6.6555	0.823181	0.150252	-2.73455
68	1001	tr|A0A023FVW4|A0A023FVW4_9ACAR	N/A	N/A	Putative tick defensins 1 OS=Amblyomma parvum PE=2 SV=1	TRUE	-44.6212	8.4844e-09	7355.32	114849	7514.13	115842	1818.15	4461.83	-107494	0.0640433	-1.19353	15.6144	3.96481
69	166	tr|L7M7M2|L7M7M2_9ACAR	N/A	N/A	Uncharacterized protein OS=Rhipicephalus pulchellus PE=2 SV=1	TRUE	-44.5008	8.6228e-09	230296	668956	228301	666434	14505.1	13351.8	-438659	0.344263	-0.46311	2.90476	1.53842
70	71	tr|A0A131XGU0|A0A131XGU0_9ACAR	N/A	N/A	Putative translation initiation factor 2c eif-2c (Fragment) OS=Hyalomma excavatum PE=2 SV=1	TRUE	-44.4418	8.6915e-09	817652	1.73586e+06	831344	1.73611e+06	40978.8	5313.35	-918208	0.471036	-0.326946	2.12298	1.08609
71	242	tr|L7M6S3|L7M6S3_9ACAR	N/A	N/A	Putative bifunctional atp sulfurylase/adenosine 5'-phosphosulfate kinase OS=Rhipicephalus pulchellus PE=2 SV=1	TRUE	44.3768	8.768e-09	546305	114130	551798	112587	12414.7	15008.3	432175	4.7867	0.680036	0.208912	-2.25903
72	378	tr|A0A023FQI7|A0A023FQI7_9ACAR	N/A	N/A	Putative cell-matrix adhesion (Fragment) OS=Amblyomma cajennense PE=2 SV=1	TRUE	-43.8913	9.3646e-09	145536	254133	146146	254548	4279.61	2484.35	-108597	0.572678	-0.24209	1.74618	0.804204
73	498	tr|J9P1M7|J9P1M7_CANLF	N/A	N/A	Uncharacterized protein OS=Canis lupus familiaris PE=4 SV=1	TRUE	43.5953	9.7516e-09	246353	43126.3	246633	43161.7	6889.6	6281.59	203227	5.71237	0.756816	0.175059	-2.51409
74	868	tr|A0A224YCX8|A0A224YCX8_9ACAR	N/A	N/A	Pancreatic trypsin inhibitor OS=Rhipicephalus zambeziensis PE=4 SV=1	TRUE	43.353	1.0082e-08	235901	44524.5	236253	47247.6	5622.29	6807.12	191377	5.29823	0.724131	0.188742	-2.40551
75	208	tr|A0A0C9SCJ0|A0A0C9SCJ0_AMBAM	N/A	N/A	Putative 60 kDa chaperonin (Fragment) OS=Amblyomma americanum PE=2 SV=1	TRUE	-43.3142	1.0136e-08	1.02212e+06	3.1965e+06	1.04416e+06	3.19052e+06	69306.1	72642.4	-2.17438e+06	0.319761	-0.495174	3.12733	1.64493
76	335	tr|E2R886|E2R886_CANLF	N/A	N/A	Uncharacterized protein OS=Canis lupus familiaris PE=4 SV=2	TRUE	43.2113	1.0282e-08	714793	112435	710494	113285	26762.5	7813.24	602358	6.35739	0.803279	0.157297	-2.66843
77	62	tr|E2RES2|E2RES2_CANLF	N/A	N/A	Serpin family C member 1 OS=Canis lupus familiaris GN=SERPINC1 PE=3 SV=2	TRUE	43.1855	1.0318e-08	2.05804e+06	246566	2.0592e+06	245829	83424.6	8849.63	1.81147e+06	8.34681	0.92152	0.119806	-3.06122
78	1053	tr|A0A0A7MGQ1|A0A0A7MGQ1_9ACAR	N/A	N/A	Cystatin OS=Rhipicephalus haemaphysaloides PE=2 SV=1	TRUE	42.9305	1.0691e-08	72437.3	15407.3	71997.9	15510.2	2413.53	1110.74	57030	4.70149	0.672235	0.212699	-2.23312
79	887	tr|A0A023GJ81|A0A023GJ81_9ACAR	N/A	N/A	Putative grp-3 498 glycine rich family OS=Amblyomma triste PE=2 SV=1	TRUE	-42.9066	1.0726e-08	438755	1.06128e+06	441780	1.06791e+06	14716.6	25008.8	-622522	0.413422	-0.383606	2.41883	1.27431
80	69	tr|L7MBN6|L7MBN6_9ACAR	N/A	N/A	Putative 24 kDa family member OS=Rhipicephalus pulchellus PE=2 SV=1	TRUE	-42.8202	1.0856e-08	645305	1.63676e+06	653018	1.62586e+06	26129.2	38232.2	-991460	0.394256	-0.404221	2.53642	1.34279
81	211	tr|E2QVU9|E2QVU9_CANLF	N/A	N/A	Biliverdin reductase B OS=Canis lupus familiaris GN=BLVRB PE=4 SV=1	TRUE	41.8221	1.2502e-08	797180	204047	806718	206801	23680.6	15613.4	593133	3.90684	0.591826	0.255961	-1.966
82	45	tr|J9NVC6|J9NVC6_CANLF	N/A	N/A	Immunoglobulin heavy constant mu OS=Canis lupus familiaris GN=IGHM PE=4 SV=1	TRUE	41.7204	1.2685e-08	5.08839e+06	693160	5.04724e+06	685830	204937	48940.4	4.39523e+06	7.34087	0.865747	0.136224	-2.87595
83	350	tr|A0A224Z3D1|A0A224Z3D1_9ACAR	N/A	N/A	Large subunit ribosomal protein L27e OS=Rhipicephalus zambeziensis PE=4 SV=1	TRUE	-41.6003	1.2906e-08	886695	2.72428e+06	889343	2.7146e+06	46032.8	75404.4	-1.83759e+06	0.325478	-0.487478	3.0724	1.61937
84	137	tr|L7ME84|L7ME84_9ACAR	N/A	N/A	Putative nucleoside diphosphate-sugar hydrolase of the mutt nudix family (Fragment) OS=Rhipicephalus pulchellus PE=2 SV=1	TRUE	41.5823	1.2939e-08	577271	136984	578436	138037	20736.3	4295.87	440286	4.21413	0.624708	0.237297	-2.07524
85	217	tr|L7M6Q0|L7M6Q0_9ACAR	N/A	N/A	Eukaryotic translation initiation factor 5A OS=Rhipicephalus pulchellus PE=2 SV=1	TRUE	-41.2505	1.3574e-08	349108	1.00168e+06	353255	998123	23133.6	21584.2	-652567	0.348524	-0.457767	2.86924	1.52067
86	94	tr|J9P8M2|J9P8M2_CANLF	N/A	N/A	Fibronectin OS=Canis lupus familiaris GN=FN1 PE=4 SV=1	TRUE	40.4887	1.5175e-08	667701	117220	661666	114784	20431.5	17942.9	550481	5.69612	0.755579	0.175558	-2.50998
87	892	tr|L7M6N0|L7M6N0_9ACAR	N/A	N/A	Putative eukaryotic translation initiation factor OS=Rhipicephalus pulchellus PE=2 SV=1	TRUE	40.4804	1.5194e-08	77274.5	12194.2	77505.9	11519.6	2842.09	1503.75	65080.2	6.33698	0.801882	0.157804	-2.66379
88	503	tr|V5H340|V5H340_IXORI	N/A	N/A	Putative vitellogenin-1 OS=Ixodes ricinus PE=2 SV=1	TRUE	40.241	1.5743e-08	276538	90099.4	275140	89461.9	8433.57	3838.74	186439	3.06926	0.487033	0.325812	-1.61789
89	36	tr|A0A224YTT8|A0A224YTT8_9ACAR	N/A	N/A	Glutamate dehydrogenase (NAD(P)+) OS=Rhipicephalus zambeziensis PE=3 SV=1	TRUE	-40.1992	1.5841e-08	1.8e+06	3.81561e+06	1.78431e+06	3.81227e+06	79943.4	60541.8	-2.01561e+06	0.471747	-0.326291	2.11978	1.08392
90	129	tr|A0A224Z0H9|A0A224Z0H9_9ACAR	N/A	N/A	RNA-binding protein LARK OS=Rhipicephalus zambeziensis PE=4 SV=1	TRUE	39.5968	1.7338e-08	285424	17240.6	284596	19807.1	8928.6	10186.6	268183	16.5553	1.21894	0.0604036	-4.04922
91	741	tr|A0A224YMT2|A0A224YMT2_9ACAR	N/A	N/A	F-type H+-transporting ATPase subunit f OS=Rhipicephalus zambeziensis PE=4 SV=1	TRUE	-39.3881	1.7894e-08	126955	313578	129375	313375	8399.43	4387.06	-186623	0.404858	-0.392697	2.47	1.30451
92	991	tr|A0A1E1XEJ2|A0A1E1XEJ2_9ACAR	N/A	N/A	Pyrroline-5-carboxylate reductase (Fragment) OS=Amblyomma aureolatum PE=2 SV=1	TRUE	-39.2151	1.8371e-08	65404.1	159372	65693.4	158860	3062.17	3686.54	-93968	0.410386	-0.386807	2.43673	1.28495
93	1000	tr|A0A023GBH4|A0A023GBH4_9ACAR	N/A	N/A	Putative secreted protein OS=Amblyomma triste PE=2 SV=1	TRUE	39.0188	1.8931e-08	185164	18217.9	184006	16514.9	6873.63	5096.91	166946	10.1638	1.00706	0.0983883	-3.34537
94	307	tr|A0A224Z0W8|A0A224Z0W8_9ACAR	N/A	N/A	Large subunit ribosomal protein L8e OS=Rhipicephalus zambeziensis PE=3 SV=1	TRUE	-38.8187	1.9522e-08	467045	1.29248e+06	465443	1.29604e+06	26370.6	33364.4	-825431	0.361357	-0.442064	2.76735	1.4685
95	86	tr|A0A224ZC41|A0A224ZC41_9ACAR	N/A	N/A	Z band alternatively spliced pdz motif protein 66 OS=Rhipicephalus zambeziensis PE=4 SV=1	TRUE	-38.5322	2.0406e-08	1.33668e+06	2.70632e+06	1.33504e+06	2.71755e+06	35456.5	61617.9	-1.36965e+06	0.493909	-0.306353	2.02467	1.01768
96	1025	tr|L7M0V0|L7M0V0_9ACAR	N/A	N/A	Putative heat shock-related protein OS=Rhipicephalus pulchellus PE=2 SV=1	TRUE	-38.3931	2.0852e-08	99965.8	233769	100133	235546	3100.76	6242.45	-133803	0.427627	-0.368934	2.33848	1.22557
97	159	tr|A0A131YNN3|A0A131YNN3_RHIAP	N/A	N/A	15-hydroxyprostaglandin dehydrogenase (NAD) OS=Rhipicephalus appendiculatus PE=3 SV=1	TRUE	-38.3903	2.0861e-08	2.09605e+06	5.38622e+06	2.12538e+06	5.38497e+06	93776.6	143479	-3.29017e+06	0.389151	-0.409882	2.5697	1.3616
98	902	tr|A0A023FXL4|A0A023FXL4_9ACAR	N/A	N/A	Protein disulfide-isomerase OS=Amblyomma parvum PE=2 SV=1	TRUE	38.3585	2.0965e-08	311708	12470.7	309676	9491.51	14178.6	6511.06	299237	24.9952	1.39786	0.0400076	-4.64358
99	158	tr|F1PAX2|F1PAX2_CANLF	N/A	N/A	Ceruloplasmin OS=Canis lupus familiaris GN=CP PE=3 SV=2	TRUE	38.2493	2.1325e-08	772796	103647	776584	103433	17090.8	30530.6	669149	7.45605	0.872509	0.134119	-2.89841
100	642	tr|E2R5J0|E2R5J0_CANLF	N/A	N/A	Pentaxin OS=Canis lupus familiaris GN=CRP PE=3 SV=2	TRUE	38.1079	2.1803e-08	106612	10885.4	107425	12596.4	1834.39	4677.12	95726.8	9.79408	0.990963	0.102103	-3.29191
101	717	tr|L7M621|L7M621_9ACAR	N/A	N/A	Putative translocon-associated protein OS=Rhipicephalus pulchellus PE=2 SV=1	TRUE	-38.0283	2.2077e-08	103065	220971	103662	220420	3893.81	4826.01	-117906	0.466417	-0.331225	2.144	1.10031
102	127	tr|A0A224Z3F9|A0A224Z3F9_9ACAR	N/A	N/A	Large subunit ribosomal protein L4e OS=Rhipicephalus zambeziensis PE=4 SV=1	TRUE	-37.8109	2.2847e-08	1.44106e+06	3.28419e+06	1.4467e+06	3.27373e+06	66436.2	71350.6	-1.84313e+06	0.438787	-0.357746	2.27901	1.18841
103	165	tr|A0A034WWK3|A0A034WWK3_RHIMP	N/A	N/A	Peptidyl-prolyl cis-trans isomerase OS=Rhipicephalus microplus PE=3 SV=1	TRUE	37.6008	2.3621e-08	587957	291595	589356	291569	15095.9	4539.23	296361	2.01634	0.304565	0.495947	-1.01174
104	67	tr|A0A131YJK6|A0A131YJK6_RHIAP	N/A	N/A	Acetyl-CoA acyltransferase 2 OS=Rhipicephalus appendiculatus PE=3 SV=1	TRUE	-37.5766	2.3712e-08	1.5256e+06	2.53901e+06	1.5211e+06	2.55518e+06	23318.5	48637.4	-1.01341e+06	0.600864	-0.221224	1.66427	0.73489
105	260	tr|A0A224Y422|A0A224Y422_9ACAR	N/A	N/A	Glycine rich superfamily member OS=Rhipicephalus zambeziensis PE=4 SV=1	TRUE	-37.464	2.4141e-08	2.92386e+06	7.42618e+06	2.96772e+06	7.35589e+06	180734	158447	-4.50232e+06	0.393723	-0.40481	2.53986	1.34475
106	31	tr|L7M5D0|L7M5D0_9ACAR	N/A	N/A	Putative synaptic vesicle membrane protein vat-1 OS=Rhipicephalus pulchellus PE=2 SV=1	TRUE	36.8214	2.6771e-08	672938	15612.6	672272	10488.4	30790.4	18074.4	657325	43.1022	1.6345	0.0232007	-5.42969
107	842	tr|A0A131XP84|A0A131XP84_9ACAR	N/A	N/A	Aconitate hydratase, mitochondrial OS=Hyalomma excavatum PE=2 SV=1	TRUE	-36.7417	2.712e-08	64068.4	161124	64587.6	161516	5034.52	1601.54	-97055.4	0.397635	-0.400516	2.51487	1.33048
108	787	tr|L7M2W1|L7M2W1_9ACAR	N/A	N/A	Putative der and-48 ribosomal protein l32 OS=Rhipicephalus pulchellus PE=2 SV=1	TRUE	-36.6308	2.7615e-08	99215.2	201771	97689.2	201446	4722.26	3008.93	-102555	0.491723	-0.30828	2.03367	1.02408
109	548	tr|A0A224YW41|A0A224YW41_9ACAR	N/A	N/A	Cytochrome b-c1 complex subunit Rieske, mitochondrial OS=Rhipicephalus zambeziensis PE=4 SV=1	TRUE	-36.2406	2.944e-08	231850	548174	233817	550338	11972.3	12704.6	-316324	0.42295	-0.373711	2.36435	1.24144
110	723	tr|A0A023G0K4|A0A023G0K4_9ACAR	N/A	N/A	Putative transforming growth factor-beta-induced protein ig-h3 OS=Amblyomma parvum PE=2 SV=1	TRUE	-36.0664	3.03e-08	66445.4	436634	68740.1	433842	16636.2	12026.7	-370188	0.152177	-0.817652	6.57131	2.71618
111	932	tr|G3MTP1|G3MTP1_9ACAR	N/A	N/A	Uncharacterized protein OS=Amblyomma maculatum PE=2 SV=1	TRUE	35.8248	3.1542e-08	1.43802e+06	297725	1.4397e+06	299872	62685.1	11096.5	1.1403e+06	4.83003	0.68395	0.207038	-2.27203
112	758	tr|A0A131YI52|A0A131YI52_RHIAP	N/A	N/A	L-iditol 2-dehydrogenase OS=Rhipicephalus appendiculatus PE=3 SV=1	TRUE	35.6921	3.2249e-08	104562	58506.6	105110	58597.6	2373.27	1013.71	46055.2	1.78718	0.252169	0.55954	-0.837686
113	112	tr|L7LZL3|L7LZL3_9ACAR	N/A	N/A	Putative tho complex subunit 4 OS=Rhipicephalus pulchellus PE=2 SV=1	TRUE	-35.6672	3.2384e-08	816991	2.31167e+06	805124	2.32124e+06	75094.3	37220.7	-1.49468e+06	0.35342	-0.451708	2.82949	1.50054
114	14	tr|F6UME0|F6UME0_CANLF	N/A	N/A	Alpha-2-macroglobulin OS=Canis lupus familiaris GN=A2M PE=4 SV=1	TRUE	35.5461	3.3048e-08	1.79088e+06	273465	1.7929e+06	274070	81753.4	24610.5	1.51742e+06	6.54885	0.816165	0.152699	-2.71124
115	141	tr|L7LXX6|L7LXX6_9ACAR	N/A	N/A	Putative rna-binding protein hnrnp-m OS=Rhipicephalus pulchellus PE=2 SV=1	TRUE	-35.2608	3.4679e-08	840999	1.63395e+06	837873	1.63694e+06	32887.6	30680.3	-792951	0.514703	-0.288443	1.94287	0.958188
116	468	tr|F1PYX9|F1PYX9_CANLF	N/A	N/A	Serpin family G member 1 OS=Canis lupus familiaris GN=SERPING1 PE=3 SV=2	TRUE	34.8988	3.6884e-08	468736	54550.3	468150	55153.5	23538.8	3056.28	414186	8.59274	0.934132	0.116377	-3.10312
117	61	tr|A0A224YU86|A0A224YU86_9ACAR	N/A	N/A	Myosin heavy chain 6/7 OS=Rhipicephalus zambeziensis PE=3 SV=1	TRUE	-34.845	3.7225e-08	62960.5	132976	64070.1	133296	2941.01	2738.66	-70015.5	0.473473	-0.324705	2.11205	1.07865
118	298	tr|L7M4Q4|L7M4Q4_9ACAR	N/A	N/A	60S ribosomal protein L18a OS=Rhipicephalus pulchellus PE=2 SV=1	TRUE	-34.466	3.9738e-08	656623	1.52669e+06	655788	1.54514e+06	8009.23	49848.9	-870064	0.430097	-0.366434	2.32506	1.21727
119	520	tr|A0A023GL48|A0A023GL48_9ACAR	N/A	N/A	Putative aldehyde dehydrogenase OS=Amblyomma triste PE=2 SV=1	TRUE	34.4482	3.9862e-08	1.83668e+06	975146	1.82988e+06	969623	42550.7	26294	861537	1.8835	0.274965	0.530928	-0.913413
120	562	tr|L7M432|L7M432_9ACAR	N/A	N/A	Histone H2A OS=Rhipicephalus pulchellus PE=2 SV=1	TRUE	-34.3314	4.0679e-08	538873	1.13631e+06	528447	1.13265e+06	23973.3	25230.8	-597433	0.474232	-0.324009	2.10867	1.07633
121	324	tr|A0A224YW31|A0A224YW31_9ACAR	N/A	N/A	Erythrocyte membrane protein 1 (Fragment) OS=Rhipicephalus zambeziensis PE=4 SV=1	TRUE	-34.2322	4.1388e-08	230417	539572	227216	543861	12590.2	12951.1	-309154	0.427038	-0.369534	2.34171	1.22757
122	874	tr|A0A224Z7I1|A0A224Z7I1_9ACAR	N/A	N/A	Synaptic vesicle membrane protein vat 1 OS=Rhipicephalus zambeziensis PE=4 SV=1	TRUE	-34.1143	4.225e-08	4697.81	635789	3572.02	629859	2899.16	36884.9	-631091	0.00738895	-2.13142	135.337	7.08042
123	50	tr|G1K2D9|G1K2D9_CANLF	N/A	N/A	Haptoglobin OS=Canis lupus familiaris GN=LOC479668 PE=3 SV=1	TRUE	33.8908	4.3941e-08	1.50665e+07	1.0173e+06	1.52311e+07	1.12516e+06	783443	271298	1.40492e+07	14.8103	1.17056	0.0675207	-3.88853
124	216	tr|E2QZQ1|E2QZQ1_CANLF	N/A	N/A	Uncharacterized protein OS=Canis lupus familiaris GN=TF PE=3 SV=1	TRUE	33.7842	4.4776e-08	893767	123915	907915	120020	40209.5	21453.6	769853	7.21275	0.858101	0.138643	-2.85055
125	59	tr|A0A224Z6S5|A0A224Z6S5_9ACAR	N/A	N/A	40S ribosomal protein S3a OS=Rhipicephalus zambeziensis PE=3 SV=1	TRUE	-33.4434	4.7571e-08	1.31718e+06	3.00465e+06	1.31519e+06	3.01896e+06	25580.7	97619.1	-1.68747e+06	0.438379	-0.35815	2.28113	1.18975
126	604	tr|V5HUX3|V5HUX3_IXORI	N/A	N/A	Putative 60s ribosomal protein l38 OS=Ixodes ricinus PE=2 SV=1	TRUE	-33.3695	4.8204e-08	403353	794395	400729	795181	8688.07	21767.3	-391042	0.507749	-0.294351	1.96948	0.977813
127	39	tr|E2RS80|E2RS80_CANLF	N/A	N/A	Uncharacterized protein OS=Canis lupus familiaris GN=CFB PE=3 SV=2	TRUE	33.3193	4.8638e-08	1.96547e+06	327759	1.95493e+06	330142	32208.3	92878.1	1.63772e+06	5.9967	0.777912	0.166758	-2.58417
128	924	tr|J9P0I1|J9P0I1_CANLF	N/A	N/A	Keratin, type I cytoskeletal 9 OS=Canis lupus familiaris GN=KRT9 PE=3 SV=1	TRUE	-33.2892	4.8902e-08	1.1846e+06	2.54776e+06	1.17715e+06	2.54282e+06	70171.5	42229.2	-1.36317e+06	0.464956	-0.332588	2.15074	1.10483
129	17	sp|P60524|HBB_CANLF	N/A	N/A	Hemoglobin subunit beta OS=Canis lupus familiaris GN=HBB PE=1 SV=1	TRUE	33.2891	4.8903e-08	2.83802e+07	5.96253e+06	2.8303e+07	5.9214e+06	1.3365e+06	166626	2.24177e+07	4.75975	0.677585	0.210095	-2.25089
130	358	tr|L7MFA9|L7MFA9_9ACAR	N/A	N/A	Putative 40s ribosomal protein s2 (Fragment) OS=Rhipicephalus pulchellus PE=2 SV=1	TRUE	-33.0967	5.0625e-08	789388	1.3752e+06	791281	1.36943e+06	32267.3	14560.1	-585815	0.574016	-0.241076	1.74211	0.800838
131	84	tr|F1PZR4|F1PZR4_CANLF	N/A	N/A	Hemopexin OS=Canis lupus familiaris GN=HPX PE=3 SV=2	TRUE	33.0933	5.0657e-08	1.23759e+07	1.7712e+06	1.24031e+07	1.76352e+06	640293	27787.1	1.06047e+07	6.98727	0.844308	0.143117	-2.80473
132	146	tr|Q4PM69|Q4PM69_IXOSC	N/A	N/A	Histone H4 OS=Ixodes scapularis GN=8030709 PE=2 SV=1	TRUE	-33.0596	5.0966e-08	4.21067e+07	7.17728e+07	4.22289e+07	7.17482e+07	1.64371e+06	720549	-2.96661e+07	0.586667	-0.231609	1.70455	0.769387
133	302	tr|A0A224Z1B9|A0A224Z1B9_9ACAR	N/A	N/A	Small subunit ribosomal protein S18e OS=Rhipicephalus zambeziensis PE=3 SV=1	TRUE	-32.9236	5.2236e-08	496604	1.32906e+06	513471	1.33907e+06	44261.4	24457.4	-832459	0.37365	-0.427535	2.6763	1.42024
134	1029	tr|L7M6C3|L7M6C3_9ACAR	N/A	N/A	Putative mitochondrial tricarboxylate/dicarboxylate carrier OS=Rhipicephalus pulchellus PE=2 SV=1	TRUE	-32.6847	5.4557e-08	23648.4	102085	23147.2	103329	1796.32	4450.73	-78436.2	0.231655	-0.635159	4.31677	2.10995
135	659	tr|A0A023G4G2|A0A023G4G2_9ACAR	N/A	N/A	Putative cuticular protein 76bd OS=Amblyomma triste PE=2 SV=1	TRUE	-32.6539	5.4865e-08	68967.9	307049	70512.1	304335	8627.95	11755.6	-238081	0.224616	-0.64856	4.45205	2.15447
136	653	tr|L7MBH0|L7MBH0_9ACAR	N/A	N/A	Putative secreted peptide OS=Rhipicephalus pulchellus PE=2 SV=1	TRUE	32.6051	5.5358e-08	214273	50013.7	216444	51740.3	7600.66	6614.35	164259	4.28429	0.631879	0.233411	-2.09906
137	453	tr|F1PAL5|F1PAL5_CANLF	N/A	N/A	Angiotensinogen OS=Canis lupus familiaris GN=AGT PE=3 SV=2	TRUE	32.5366	5.6056e-08	223301	28913.1	219739	27884.9	9835.39	6785.28	194388	7.72316	0.887795	0.129481	-2.94919
138	292	tr|Q4PMD3|Q4PMD3_IXOSC	N/A	N/A	40S ribosomal protein S10 OS=Ixodes scapularis GN=8043970 PE=2 SV=1	TRUE	-32.515	5.628e-08	1.19632e+06	3.11594e+06	1.19679e+06	3.07181e+06	42834.6	110032	-1.91962e+06	0.383936	-0.415741	2.6046	1.38106
139	218	tr|F1PCG4|F1PCG4_CANLF	N/A	N/A	Peroxiredoxin 2 OS=Canis lupus familiaris GN=PRDX2 PE=4 SV=2	TRUE	32.5115	5.6315e-08	4.0479e+06	855947	4.08538e+06	869848	192780	37314.3	3.19195e+06	4.72915	0.674783	0.211455	-2.24158
140	899	tr|A0A1E1X830|A0A1E1X830_9ACAR	N/A	N/A	Putative glutathione s-transferase (Fragment) OS=Amblyomma aureolatum PE=2 SV=1	TRUE	32.51	5.6331e-08	120159	12714	119673	13431.8	6418.81	1578.05	107445	9.45087	0.975472	0.10581	-3.24045
141	371	tr|F1PDY8|F1PDY8_CANLF	N/A	N/A	Carbonic anhydrase 2 OS=Canis lupus familiaris GN=CA2 PE=4 SV=2	TRUE	32.4882	5.6557e-08	448121	85619.5	446534	89574.8	19270.1	11254.4	362501	5.23386	0.718822	0.191063	-2.38788
142	928	tr|L7M3S2|L7M3S2_9ACAR	N/A	N/A	Putative elongation factor 1 beta OS=Rhipicephalus pulchellus PE=2 SV=1	TRUE	32.3496	5.8019e-08	72526.5	16045.2	72789.7	15702.7	3322.3	1075.09	56481.2	4.52012	0.65515	0.221233	-2.17636
143	264	tr|A0A224YPY7|A0A224YPY7_9ACAR	N/A	N/A	2-oxoglutarate dehydrogenase E2 component (Dihydrolipoamide succinyltransferase) OS=Rhipicephalus zambeziensis PE=4 SV=1	TRUE	-31.5945	6.6803e-08	472495	891364	471916	893566	21770.9	15135.7	-418869	0.53008	-0.275658	1.88651	0.915717
144	164	tr|C9W1L7|C9W1L7_RHISA	N/A	N/A	60S ribosomal protein L9 OS=Rhipicephalus sanguineus PE=2 SV=1	TRUE	-31.5444	6.744e-08	539046	1.08557e+06	537877	1.08816e+06	13355.1	31974.2	-546525	0.496555	-0.304032	2.01387	1.00997
145	193	tr|A0A224YZF6|A0A224YZF6_9ACAR	N/A	N/A	Glutathione S-transferase OS=Rhipicephalus zambeziensis PE=3 SV=1	TRUE	31.3019	7.0619e-08	3.99015e+06	820174	4.0549e+06	819377	201185	23403.3	3.16997e+06	4.865	0.687083	0.20555	-2.28244
146	584	tr|E2R7W6|E2R7W6_CANLF	N/A	N/A	Uncharacterized protein OS=Canis lupus familiaris GN=KRT42 PE=3 SV=1	TRUE	-31.2802	7.0911e-08	354913	603561	355144	603542	14149.7	7248.06	-248648	0.588032	-0.230599	1.70059	0.766034
147	1056	tr|A0A224Z9L1|A0A224Z9L1_9ACAR	N/A	N/A	Superoxide dismutase Cu-Zn family (Fragment) OS=Rhipicephalus zambeziensis PE=4 SV=1	TRUE	31.278	7.0941e-08	111312	87241.1	111359	87232.4	1533.65	129.769	24070.5	1.27591	0.105819	0.783755	-0.351525
148	790	tr|A0A224YML8|A0A224YML8_9ACAR	N/A	N/A	Lipocalin OS=Rhipicephalus zambeziensis PE=4 SV=1	TRUE	31.1483	7.2722e-08	238547	20152.9	239613	20109.1	8831.8	10892.2	218394	11.8369	1.07324	0.0844818	-3.56522
149	522	tr|A0A131XRP8|A0A131XRP8_9ACAR	N/A	N/A	60S ribosomal protein L6 OS=Hyalomma excavatum PE=2 SV=1	TRUE	-31.1111	7.3243e-08	207529	521348	215333	521605	18474	8105.76	-313818	0.398063	-0.400048	2.51216	1.32893
150	89	tr|L7LRH1|L7LRH1_9ACAR	N/A	N/A	Putative glycine rich protein OS=Rhipicephalus pulchellus PE=2 SV=1	TRUE	-31.0817	7.3657e-08	5.09177e+06	9.91575e+06	5.09805e+06	9.88624e+06	269988	153163	-4.82399e+06	0.513503	-0.289457	1.94741	0.961557
151	174	tr|L7M3S8|L7M3S8_9ACAR	N/A	N/A	Putative ribosomal protein s16 OS=Rhipicephalus pulchellus PE=2 SV=1	TRUE	-31.0102	7.4677e-08	1.03544e+06	2.15334e+06	1.03648e+06	2.14518e+06	28638.7	66167.4	-1.1179e+06	0.480852	-0.317989	2.07964	1.05634
152	144	tr|A0A224YEQ4|A0A224YEQ4_9ACAR	N/A	N/A	Glycine rich superfamily member (Fragment) OS=Rhipicephalus zambeziensis PE=4 SV=1	TRUE	-30.9172	7.6027e-08	4.48875e+06	9.58716e+06	4.49379e+06	9.60495e+06	245659	220060	-5.09841e+06	0.468204	-0.329565	2.13582	1.09479
153	500	tr|J9NRV7|J9NRV7_CANLF	N/A	N/A	Fibrinogen alpha chain OS=Canis lupus familiaris GN=FGA PE=4 SV=1	TRUE	30.6622	7.9879e-08	733696	57849.5	740837	56316.5	42358.6	12210.4	675846	12.6828	1.10322	0.0788467	-3.66481
154	172	tr|A0A224YZD3|A0A224YZD3_9ACAR	N/A	N/A	Small subunit ribosomal protein S19e OS=Rhipicephalus zambeziensis PE=4 SV=1	TRUE	-30.5936	8.0953e-08	575284	1.11666e+06	573506	1.11662e+06	18907	29918.1	-541379	0.515182	-0.28804	1.94106	0.956847
155	135	tr|E2RCC8|E2RCC8_CANLF	N/A	N/A	Immunoglobulin heavy constant mu OS=Canis lupus familiaris GN=IGHM PE=4 SV=2	TRUE	30.3924	8.4205e-08	4.40433e+06	401701	4.38702e+06	396785	262925	15758.5	4.00263e+06	10.9642	1.03998	0.0912059	-3.45473
156	109	tr|A0A224YHY0|A0A224YHY0_9ACAR	N/A	N/A	Aspartate aminotransferase OS=Rhipicephalus zambeziensis PE=4 SV=1	TRUE	-30.3796	8.4415e-08	1.18286e+06	2.02445e+06	1.19012e+06	2.01453e+06	45233.8	31993.8	-841589	0.584286	-0.233374	1.71149	0.775252
157	761	tr|J9JHH5|J9JHH5_CANLF	N/A	N/A	Joining chain of multimeric IgA and IgM OS=Canis lupus familiaris GN=JCHAIN PE=4 SV=1	TRUE	30.3747	8.4498e-08	311781	51713.6	310693	51762.9	17086	1139.22	260068	6.02899	0.780245	0.165865	-2.59192
158	1062	tr|A0A131XPE0|A0A131XPE0_9ACAR	N/A	N/A	Isocitrate dehydrogenase [NADP] OS=Hyalomma excavatum PE=2 SV=1	TRUE	30.3231	8.5358e-08	351114	99899.8	345271	98709.5	16327.8	2818.07	251214	3.51466	0.545884	0.284522	-1.81339
159	338	tr|L7M6Q1|L7M6Q1_9ACAR	N/A	N/A	Putative bisphosphate 3'-nucleotidase bpnt1/inositol polyphosphate 1-phosphatase OS=Rhipicephalus pulchellus PE=2 SV=1	TRUE	30.1213	8.8827e-08	372229	205517	373425	205325	5874.72	9381.79	166711	1.81118	0.257961	0.552126	-0.856929
160	188	tr|A0A131YXL2|A0A131YXL2_RHIAP	N/A	N/A	Elongation factor Tu OS=Rhipicephalus appendiculatus PE=3 SV=1	TRUE	-30.0141	9.0737e-08	330055	722832	329249	718871	18680.6	18331.7	-392777	0.456614	-0.340451	2.19003	1.13095
161	925	tr|A0A131YGD2|A0A131YGD2_RHIAP	N/A	N/A	Glycine rich superfamily member OS=Rhipicephalus appendiculatus PE=4 SV=1	TRUE	29.9433	9.2025e-08	63112.5	7294.71	63667.8	6284.94	1159.44	3543.37	55817.8	8.65182	0.937108	0.115583	-3.113
162	878	tr|A0A131XF49|A0A131XF49_9ACAR	N/A	N/A	Putative secreted salivary gland peptide OS=Hyalomma excavatum PE=2 SV=1	TRUE	29.9014	9.2796e-08	311058	14108.3	318837	15214.1	18556.8	7081.26	296950	22.0479	1.34337	0.0453558	-4.46257
163	136	tr|E2R4E7|E2R4E7_CANLF	N/A	N/A	Afamin OS=Canis lupus familiaris GN=AFM PE=3 SV=2	TRUE	29.7169	9.6285e-08	1.19856e+06	141863	1.21182e+06	140048	70698.1	7712.01	1.0567e+06	8.44872	0.926791	0.118361	-3.07873
164	472	tr|A0A131YI86|A0A131YI86_RHIAP	N/A	N/A	Cystatin-A/B OS=Rhipicephalus appendiculatus PE=4 SV=1	TRUE	29.5938	9.87e-08	162791	25750.9	161499	24997.6	9083.81	1804.93	137040	6.32175	0.800837	0.158184	-2.66032
165	92	tr|A0A131Z0F3|A0A131Z0F3_RHIAP	N/A	N/A	Uncharacterized protein OS=Rhipicephalus appendiculatus PE=4 SV=1	TRUE	-29.4011	1.0262e-07	9.90907e+06	1.34508e+07	9.90865e+06	1.33975e+07	34120.5	238494	-3.54169e+06	0.736692	-0.132714	1.35742	0.440866
166	739	tr|L7M4K4|L7M4K4_9ACAR	N/A	N/A	Uncharacterized protein OS=Rhipicephalus pulchellus PE=2 SV=1	TRUE	-29.3781	1.031e-07	127000	252699	127067	250789	2718.72	8113.94	-125699	0.502575	-0.298799	1.98975	0.992588
167	812	tr|A0A224YRP1|A0A224YRP1_9ACAR	N/A	N/A	Adenylate cyclase terminal differentiation specific OS=Rhipicephalus zambeziensis PE=4 SV=1	TRUE	-29.2474	1.0588e-07	269973	433609	269931	430880	7653.56	8163.02	-163636	0.622618	-0.205779	1.60612	0.683582
168	362	tr|C9W1K7|C9W1K7_RHISA	N/A	N/A	Cytochrome c oxidase polypeptide Vb OS=Rhipicephalus sanguineus PE=2 SV=1	TRUE	-29.1139	1.0881e-07	201676	323264	200262	321821	7552.27	3567.72	-121588	0.623874	-0.204903	1.60289	0.680673
169	114	tr|A0A023FX57|A0A023FX57_9ACAR	N/A	N/A	Annexin (Fragment) OS=Amblyomma parvum PE=2 SV=1	TRUE	-29.0972	1.0918e-07	350232	540644	344606	540351	12135.7	4901.03	-190412	0.647806	-0.188555	1.54367	0.626367
170	556	tr|J9JHZ3|J9JHZ3_CANLF	N/A	N/A	Uncharacterized protein OS=Canis lupus familiaris PE=3 SV=1	TRUE	28.9999	1.1138e-07	2.77979e+06	163967	2.79339e+06	164122	180382	2663.68	2.61582e+06	16.9534	1.22926	0.0589853	-4.0835
171	276	tr|A0A131XJK5|A0A131XJK5_9ACAR	N/A	N/A	Putative rho guanine nucleotide exchange factor cdep OS=Hyalomma excavatum PE=2 SV=1	TRUE	-28.9591	1.1232e-07	218458	652709	227495	655437	26091	14788.5	-434251	0.334694	-0.475351	2.9878	1.57908
172	323	tr|L7LY48|L7LY48_9ACAR	N/A	N/A	Putative transcriptional regulator dj-1 OS=Rhipicephalus pulchellus PE=2 SV=1	TRUE	-28.8367	1.152e-07	231627	570918	234608	573793	13860.6	19016.7	-339291	0.40571	-0.391785	2.46482	1.30148
173	380	tr|L7N095|L7N095_CANLF	N/A	N/A	Keratin 5 OS=Canis lupus familiaris GN=KRT5 PE=3 SV=1	TRUE	-28.8008	1.1605e-07	606817	1.19097e+06	601516	1.1922e+06	29229.8	28127.2	-584153	0.509515	-0.292843	1.96265	0.972803
174	639	tr|F1PY40|F1PY40_CANLF	N/A	N/A	Complement factor I OS=Canis lupus familiaris GN=CFI PE=4 SV=2	TRUE	28.4595	1.246e-07	207142	36359.2	205800	36233.2	9370.43	7499.22	170783	5.6971	0.755654	0.175528	-2.51023
175	445	tr|L7M3E5|L7M3E5_9ACAR	N/A	N/A	Putative cytochrome c oxidase subunit iv/cox5b OS=Rhipicephalus pulchellus PE=2 SV=1	TRUE	-28.3998	1.2617e-07	297281	723646	306561	730030	24193.3	17783.1	-426364	0.410811	-0.386358	2.43421	1.28345
176	185	tr|A0A224YUJ4|A0A224YUJ4_9ACAR	N/A	N/A	Leucyl aminopeptidase OS=Rhipicephalus zambeziensis PE=4 SV=1	TRUE	28.3432	1.2768e-07	900866	482115	900923	485792	19080	22562.6	418751	1.86857	0.27151	0.535168	-0.901935
177	368	tr|A0A224Z0L0|A0A224Z0L0_9ACAR	N/A	N/A	Histone H1/5 OS=Rhipicephalus zambeziensis PE=3 SV=1	TRUE	-28.3374	1.2784e-07	407639	1.89531e+06	397667	1.90184e+06	42681.7	95929.9	-1.48767e+06	0.215078	-0.667403	4.64947	2.21707
178	256	tr|A0A224YTJ8|A0A224YTJ8_9ACAR	N/A	N/A	Ankyrin OS=Rhipicephalus zambeziensis PE=4 SV=1	TRUE	-28.3352	1.279e-07	281559	535597	283368	540442	6780.11	16599.7	-254039	0.525691	-0.27927	1.90226	0.927714
179	293	tr|L7M022|L7M022_9ACAR	N/A	N/A	Uncharacterized protein OS=Rhipicephalus pulchellus PE=2 SV=1	TRUE	-28.2047	1.3146e-07	393057	895109	390736	897584	11151.5	33808.9	-502051	0.439117	-0.35742	2.2773	1.18732
180	906	tr|A0A131Z0H3|A0A131Z0H3_RHIAP	N/A	N/A	Abc transporter OS=Rhipicephalus appendiculatus PE=4 SV=1	TRUE	28.1944	1.3175e-07	594966	282042	600704	279064	18347.5	12494.2	312924	2.1095	0.324179	0.474047	-1.0769
181	501	tr|F1PPK4|F1PPK4_CANLF	N/A	N/A	Uncharacterized protein OS=Canis lupus familiaris PE=4 SV=2	TRUE	28.1741	1.3232e-07	167995	21806.7	170295	24810.7	8071.73	6522.3	146189	7.70384	0.886707	0.129805	-2.94558
182	409	tr|A0A023GGV5|A0A023GGV5_9ACAR	N/A	N/A	Putative creatine kinase OS=Amblyomma triste PE=2 SV=1	TRUE	-27.9441	1.3894e-07	125048	326476	129764	324175	10719.7	9639.7	-201428	0.383023	-0.416776	2.61081	1.3845
183	891	tr|A0A023GNQ8|A0A023GNQ8_9ACAR	N/A	N/A	Putative t-complex protein 1 (Fragment) OS=Amblyomma triste PE=2 SV=1	TRUE	27.8633	1.4136e-07	76802.2	7544.84	76860.2	7007.03	4686.2	1659.1	69257.3	10.1794	1.00772	0.0982373	-3.34759
184	840	tr|Q4PMC2|Q4PMC2_IXOSC	N/A	N/A	Ribosomal protein S20 OS=Ixodes scapularis GN=8037486 PE=2 SV=1	TRUE	-27.8454	1.419e-07	469109	1.37624e+06	464098	1.37952e+06	60728.2	23606.2	-907133	0.340862	-0.467421	2.93374	1.55274
185	611	tr|A0A034WWP0|A0A034WWP0_RHIMP	N/A	N/A	ML domain-containing protein 1 (Fragment) OS=Rhipicephalus microplus PE=4 SV=1	TRUE	27.6347	1.4848e-07	73658.2	9150.21	73669.9	10409.1	1706.05	4345.74	64508	8.04989	0.90579	0.124225	-3.00897
186	705	tr|L7M4U7|L7M4U7_9ACAR	N/A	N/A	Eukaryotic translation initiation factor 3 subunit F OS=Rhipicephalus pulchellus PE=2 SV=1	TRUE	-27.1895	1.6356e-07	92900.2	167029	92758.3	165366	3937.53	3772.03	-74128.7	0.556192	-0.254775	1.79794	0.846344
187	601	tr|C9W1T1|C9W1T1_RHISA	N/A	N/A	Cement-like protein (Fragment) OS=Rhipicephalus sanguineus PE=2 SV=1	TRUE	-27.1865	1.6367e-07	1.00061e+06	3.13614e+06	1.00111e+06	3.18446e+06	96064.9	124309	-2.13553e+06	0.319058	-0.496131	3.13423	1.64811
188	609	tr|Q6JVM9|Q6JVM9_RHIAP	N/A	N/A	Glutathione S-transferase OS=Rhipicephalus appendiculatus GN=GST PE=2 SV=1	TRUE	27.1486	1.6504e-07	964183	196574	974507	195887	54331.8	15678.5	767609	4.90493	0.690633	0.203877	-2.29423
189	334	tr|V9VL04|V9VL04_RHIMP	N/A	N/A	Serine protease inhibitor 6 RmS6 OS=Rhipicephalus microplus GN=RmS-6 PE=2 SV=1	TRUE	27.0875	1.6726e-07	1.13925e+06	491766	1.12691e+06	494853	42273.2	22326	647483	2.31665	0.36486	0.431658	-1.21204
190	989	tr|A0A1E1XU98|A0A1E1XU98_9ACAR	N/A	N/A	Cystatin OS=Amblyomma sculptum PE=2 SV=1	TRUE	27.044	1.6887e-07	210036	16722.3	210408	13019.4	7157.37	12375.5	193313	12.5602	1.099	0.0796163	-3.65079
191	607	tr|A0A023GFY8|A0A023GFY8_9ACAR	N/A	N/A	Putative actin-binding cytoskeleton protein filamin (Fragment) OS=Amblyomma triste PE=2 SV=1	TRUE	-26.6421	1.8463e-07	170895	272484	170921	274888	4963.4	5790.03	-101590	0.627172	-0.202613	1.59446	0.673067
192	469	tr|C9W1R6|C9W1R6_RHISA	N/A	N/A	Hematopoietic stem/progenitor cells protein-like protein OS=Rhipicephalus sanguineus PE=2 SV=1	TRUE	-26.5974	1.8648e-07	101393	231764	99688	230448	4096.2	8906.49	-130371	0.437484	-0.359038	2.2858	1.1927
193	367	tr|A0A224ZBY8|A0A224ZBY8_9ACAR	N/A	N/A	Vitellogenin 3 OS=Rhipicephalus zambeziensis PE=4 SV=1	TRUE	-26.4715	1.9183e-07	264283	586529	268417	585588	23344.1	6914.64	-322246	0.450588	-0.34622	2.21932	1.15012
194	34	tr|F1PCK2|F1PCK2_CANLF	N/A	N/A	Alpha-1-B glycoprotein OS=Canis lupus familiaris GN=A1BG PE=4 SV=2	TRUE	26.2523	2.0156e-07	4.98657e+06	755602	5.08296e+06	751935	318941	46624.4	4.23097e+06	6.59946	0.819509	0.151527	-2.72235
195	897	tr|A0A131XQ18|A0A131XQ18_9ACAR	N/A	N/A	Putative fatty acid-binding protein fabp (Fragment) OS=Hyalomma excavatum PE=2 SV=1	TRUE	26.2251	2.0282e-07	1.1583e+06	403694	1.16171e+06	404070	57371.7	4507.92	754606	2.86925	0.457769	0.348523	-1.52068
196	15	tr|A0A034WXH7|A0A034WXH7_RHIMP	N/A	N/A	Vitellogenin 4 (Fragment) OS=Rhipicephalus microplus PE=4 SV=1	TRUE	25.9961	2.1369e-07	1.37472e+07	4.4487e+06	1.36416e+07	4.48078e+06	708940	95769.7	9.29854e+06	3.09017	0.489982	0.323607	-1.62769
197	466	tr|L7MEN3|L7MEN3_9ACAR	N/A	N/A	Putative glycine rich protein (Fragment) OS=Rhipicephalus pulchellus PE=2 SV=1	TRUE	25.9634	2.153e-07	1.07494e+07	4.84702e+06	1.07807e+07	4.87891e+06	436115	128573	5.90241e+06	2.21774	0.345911	0.450909	-1.14909
198	521	tr|R4JQY0|R4JQY0_RHIMP	N/A	N/A	Calreticulin (Fragment) OS=Rhipicephalus microplus PE=2 SV=1	TRUE	25.8521	2.2087e-07	109818	12655.5	107799	10376.1	5721.73	4874.79	97162	8.67744	0.938392	0.115241	-3.11727
199	207	tr|A0A023GME3|A0A023GME3_9ACAR	N/A	N/A	Putative vitellogenin-1 (Fragment) OS=Amblyomma triste PE=2 SV=1	TRUE	25.7046	2.2852e-07	2.22668e+06	652339	2.22786e+06	627397	99918.3	70861.1	1.57434e+06	3.41338	0.533185	0.292965	-1.7712
200	680	tr|A0A224YNS0|A0A224YNS0_9ACAR	N/A	N/A	Serine protease inhibitor OS=Rhipicephalus zambeziensis PE=3 SV=1	TRUE	25.6972	2.2892e-07	431592	254155	431786	258341	8931.75	10532.5	177436	1.69814	0.229974	0.588879	-0.763957
201	558	tr|A0A224Y9K2|A0A224Y9K2_9ACAR	N/A	N/A	Glycine rich superfamily member OS=Rhipicephalus zambeziensis PE=4 SV=1	TRUE	25.6171	2.3321e-07	106628	29098.4	105804	29836.1	4573.44	3965.11	77529.7	3.6644	0.564003	0.272896	-1.87358
202	555	tr|G3MN41|G3MN41_9ACAR	N/A	N/A	Uncharacterized protein OS=Amblyomma maculatum PE=2 SV=1	TRUE	-25.4068	2.4494e-07	369626	721251	370970	718636	20366.3	18744.9	-351625	0.51248	-0.290323	1.9513	0.964433
203	219	tr|A0A224YC84|A0A224YC84_9ACAR	N/A	N/A	Adducin OS=Rhipicephalus zambeziensis PE=4 SV=1	TRUE	-25.3539	2.48e-07	604479	957565	606530	958738	23970.5	14184.1	-353086	0.631267	-0.199787	1.58412	0.663678
204	386	tr|L7M574|L7M574_9ACAR	N/A	N/A	Putative 60s ribosomal protein l13a OS=Rhipicephalus pulchellus PE=2 SV=1	TRUE	-25.2822	2.5221e-07	761108	1.34559e+06	780605	1.35162e+06	42521.7	18158	-584480	0.565632	-0.247466	1.76793	0.822064
205	896	tr|A0A023FIT8|A0A023FIT8_9ACAR	N/A	N/A	Putative myosin regulatory light chain ixodes scapularis myosin regulatory light chain (Fragment) OS=Amblyomma cajennense PE=2 SV=1	TRUE	25.2608	2.5349e-07	64689.7	26095.7	64205.7	26529.6	2017.73	2294.73	38594.1	2.47894	0.394267	0.403398	-1.30973
206	1078	tr|A0A131XL72|A0A131XL72_9ACAR	N/A	N/A	Amine oxidase OS=Hyalomma excavatum PE=2 SV=1	TRUE	-25.0928	2.6375e-07	42316.9	213854	40902.6	212230	9549.1	9784.92	-171537	0.197877	-0.703604	5.05364	2.33732
207	564	tr|A0A224YTK8|A0A224YTK8_9ACAR	N/A	N/A	Mitochondrial 2-oxoglutarate/malate carrier protein OS=Rhipicephalus zambeziensis PE=3 SV=1	TRUE	-24.9691	2.7162e-07	152006	500057	154845	494118	10572	25796.3	-348051	0.303977	-0.517159	3.28972	1.71796
208	25	tr|A0A131YL88|A0A131YL88_RHIAP	N/A	N/A	Alpha-1,4 glucan phosphorylase OS=Rhipicephalus appendiculatus PE=3 SV=1	TRUE	-24.8709	2.7807e-07	821051	1.3352e+06	813225	1.34024e+06	35405.7	21350.8	-514145	0.614929	-0.211175	1.6262	0.701508
209	700	tr|A0A131YEN4|A0A131YEN4_RHIAP	N/A	N/A	TIL domain containing protein OS=Rhipicephalus appendiculatus PE=4 SV=1	TRUE	24.6802	2.9109e-07	266138	24343.3	268628	29053.6	16463.5	10624.8	241794	10.9327	1.03873	0.091469	-3.45057
210	530	tr|A0A131YQ21|A0A131YQ21_RHIAP	N/A	N/A	Glutathione S-transferase OS=Rhipicephalus appendiculatus PE=3 SV=1	TRUE	24.6389	2.9401e-07	472139	166485	465743	164383	22736.9	9929.93	305654	2.83593	0.452696	0.352618	-1.50382
211	1033	tr|Q3L6K7|Q3L6K7_9ACAR	N/A	N/A	Myosin alkali light chain protein OS=Haemaphysalis qinghaiensis PE=2 SV=1	TRUE	-24.6194	2.954e-07	299632	519643	297881	519609	15897.6	8167.53	-220011	0.576611	-0.239117	1.73427	0.79433
212	41	tr|A0A224YK95|A0A224YK95_9ACAR	N/A	N/A	Creatine kinase OS=Rhipicephalus zambeziensis PE=3 SV=1	TRUE	24.5747	2.9861e-07	52642.8	3065.73	52509.9	2658.31	3408.8	2158.63	49577.1	17.1714	1.2348	0.0582365	-4.10193
213	281	tr|C9W1B4|C9W1B4_RHISA	N/A	N/A	Hypothetical secreted protein (Fragment) OS=Rhipicephalus sanguineus PE=2 SV=1	TRUE	24.5506	3.0035e-07	838076	339989	838194	341058	39237.1	10338.6	498087	2.46501	0.391818	0.405678	-1.30159
214	21	tr|L7M741|L7M741_9ACAR	N/A	N/A	Putative hydroxyacyl-coenzyme a dehydrogenase/3-ketoacyl-coenzyme a thiolase/enoyl-coenzyme a hydrat OS=Rhipicephalus pulchellus PE=2 SV=1	TRUE	-24.477	3.0577e-07	898928	1.93917e+06	891729	1.932e+06	25599.8	81050.6	-1.04024e+06	0.463564	-0.333891	2.1572	1.10916
215	23	tr|F1PDJ5|F1PDJ5_CANLF	N/A	N/A	Apolipoprotein A-I OS=Canis lupus familiaris GN=APOA1 PE=3 SV=1	TRUE	24.4267	3.0953e-07	2.00323e+07	2.19204e+06	2.01409e+07	2.18315e+06	1.46014e+06	41026.6	1.78402e+07	9.13863	0.960881	0.109426	-3.19198
216	425	tr|J9P9J6|J9P9J6_CANLF	N/A	N/A	Uncharacterized protein OS=Canis lupus familiaris PE=4 SV=1	TRUE	24.3404	3.1612e-07	206250	24309.1	207781	24481	14328.7	4264.17	181941	8.48449	0.928626	0.117862	-3.08483
217	203	tr|A0A224Z6J6|A0A224Z6J6_9ACAR	N/A	N/A	Prohibitin OS=Rhipicephalus zambeziensis PE=4 SV=1	TRUE	-24.1975	3.2738e-07	156287	290221	155562	291279	7620.73	8029.34	-133934	0.538511	-0.268805	1.85697	0.892952
218	161	tr|L7M706|L7M706_9ACAR	N/A	N/A	Putative oligomycin sensitivity-conferring protein OS=Rhipicephalus pulchellus PE=2 SV=1	TRUE	-24.1885	3.2811e-07	1.1273e+06	2.0578e+06	1.14314e+06	2.05262e+06	51420.4	57230.3	-930500	0.547819	-0.261363	1.82542	0.868229
219	759	tr|A0A023FWX3|A0A023FWX3_9ACAR	N/A	N/A	Succinate dehydrogenase [ubiquinone] flavoprotein subunit, mitochondrial OS=Amblyomma parvum PE=2 SV=1	TRUE	-24.1416	3.3192e-07	58595.4	116930	58309.1	116753	2940.53	3835.15	-58334.7	0.501115	-0.300063	1.99555	0.996787
220	124	tr|F1Q418|F1Q418_CANLF	N/A	N/A	Inter-alpha-trypsin inhibitor heavy chain 1 OS=Canis lupus familiaris GN=ITIH1 PE=4 SV=2	TRUE	24.0969	3.356e-07	909282	157230	923795	158315	57103.7	25205.3	752053	5.78315	0.762164	0.172916	-2.53185
221	285	tr|L7M4P3|L7M4P3_9ACAR	N/A	N/A	Putative dorsal switch protein 1 OS=Rhipicephalus pulchellus PE=2 SV=1	TRUE	-24.0656	3.382e-07	267138	784689	266969	774689	25500	34637.6	-517551	0.340438	-0.467962	2.93739	1.55453
222	1065	tr|A0A131YXD4|A0A131YXD4_RHIAP	N/A	N/A	L-fuconate dehydratase OS=Rhipicephalus appendiculatus PE=4 SV=1	TRUE	24.0174	3.4226e-07	80724.3	6943.72	80367.4	5495.48	1958.48	5823.42	73780.6	11.6255	1.06541	0.0860177	-3.53922
223	543	tr|A0A224Z2K0|A0A224Z2K0_9ACAR	N/A	N/A	Tropomyosin OS=Rhipicephalus zambeziensis PE=4 SV=1	TRUE	23.9565	3.4746e-07	299800	101104	298371	100957	15796.9	5061.72	198696	2.96527	0.472064	0.337238	-1.56816
224	665	tr|A0A224YCG2|A0A224YCG2_9ACAR	N/A	N/A	Pancreatic trypsin inhibitor OS=Rhipicephalus zambeziensis PE=4 SV=1	TRUE	23.9472	3.4826e-07	335830	59843.4	337052	65429.7	16274.8	16322.1	275986	5.61181	0.749103	0.178195	-2.48847
225	747	tr|F1Q184|F1Q184_CANLF	N/A	N/A	Uncharacterized protein OS=Canis lupus familiaris PE=4 SV=2	TRUE	23.9122	3.513e-07	105981	17251.1	104189	16727	6560.2	3469.71	88729.4	6.14341	0.788409	0.162776	-2.61904
226	364	tr|E2R4V3|E2R4V3_CANLF	N/A	N/A	Serpin family F member 2 OS=Canis lupus familiaris GN=SERPINF2 PE=3 SV=1	TRUE	23.8664	3.5533e-07	273052	38273.4	272883	38032.3	11537.5	15936.4	234779	7.13426	0.853349	0.140169	-2.83476
227	622	tr|A0A224YIQ8|A0A224YIQ8_9ACAR	N/A	N/A	Actin-related protein 2/3 complex subunit 5 OS=Rhipicephalus zambeziensis PE=3 SV=1	TRUE	-23.7891	3.6226e-07	13858.3	153623	10970.1	154696	9867.43	6380.03	-139765	0.0902094	-1.04475	11.0853	3.47058
228	675	tr|A0A131Z6W5|A0A131Z6W5_RHIAP	N/A	N/A	NADH dehydrogenase (Ubiquinone) 1 alpha subcomplex subunit 6 OS=Rhipicephalus appendiculatus PE=3 SV=1	TRUE	-23.599	3.7995e-07	209298	358542	212509	356604	10898.3	6419.34	-149244	0.583748	-0.233774	1.71307	0.776582
229	138	tr|A0A224YL52|A0A224YL52_9ACAR	N/A	N/A	Calsequestrin OS=Rhipicephalus zambeziensis PE=3 SV=1	TRUE	-23.5531	3.8437e-07	4665.31	37171.5	4766.45	36913.6	1851.28	2047.37	-32506.2	0.125508	-0.901329	7.96764	2.99415
230	879	tr|A0A131YTY2|A0A131YTY2_RHIAP	N/A	N/A	Aspartate aminotransferase OS=Rhipicephalus appendiculatus PE=4 SV=1	TRUE	23.518	3.8779e-07	79336.5	29330	78318.1	29446.3	4212.32	583.954	50006.5	2.70496	0.432161	0.369691	-1.43561
231	436	tr|A0A224YCQ3|A0A224YCQ3_9ACAR	N/A	N/A	Lipocalin (Fragment) OS=Rhipicephalus zambeziensis PE=4 SV=1	TRUE	23.4683	3.927e-07	3.28469e+06	1.73955e+06	3.27136e+06	1.74852e+06	129217	25346.1	1.54514e+06	1.88824	0.276058	0.529593	-0.917043
232	13	tr|A0A131YSR5|A0A131YSR5_RHIAP	N/A	N/A	Vitellogenin B OS=Rhipicephalus appendiculatus PE=4 SV=1	TRUE	23.4385	3.9568e-07	1.36859e+06	800610	1.36048e+06	804523	40700	26314.2	567981	1.70944	0.232853	0.584988	-0.77352
233	886	tr|A0A224YRN6|A0A224YRN6_9ACAR	N/A	N/A	2,3-bisphosphoglycerate-independent phosphoglycerate mutase OS=Rhipicephalus zambeziensis PE=3 SV=1	TRUE	23.3603	4.0362e-07	84342.8	2607.81	81542.9	2698.15	6945.91	850.444	81735	32.3423	1.50977	0.0309192	-5.01535
234	329	tr|F1P7J4|F1P7J4_CANLF	N/A	N/A	Complement C5 OS=Canis lupus familiaris GN=C5 PE=4 SV=2	TRUE	23.3368	4.0604e-07	303314	70667.9	298451	72898	18527.6	7366.01	232646	4.2921	0.63267	0.232986	-2.10168
235	960	tr|L7LQQ6|L7LQQ6_9ACAR	N/A	N/A	Putative microplusin-like antibacteral peptide OS=Rhipicephalus pulchellus PE=2 SV=1	TRUE	23.3211	4.0766e-07	161060	39661.3	159253	41838.4	4050.06	9591.02	121399	4.0609	0.608622	0.246251	-2.0218
236	145	tr|L7MAZ4|L7MAZ4_9ACAR	N/A	N/A	3-hydroxyisobutyryl-CoA hydrolase, mitochondrial OS=Rhipicephalus pulchellus PE=2 SV=1	TRUE	-23.3027	4.0958e-07	937930	1.3891e+06	939295	1.38847e+06	27161.6	27598.2	-451167	0.675208	-0.170562	1.48102	0.566595
237	540	tr|A0A224Y3J9|A0A224Y3J9_9ACAR	N/A	N/A	Glutathione S-transferase OS=Rhipicephalus zambeziensis PE=4 SV=1	TRUE	23.2429	4.1588e-07	503777	222712	503411	222783	23319.8	6411.04	281065	2.26201	0.354494	0.442085	-1.1776
238	340	tr|F1PG16|F1PG16_CANLF	N/A	N/A	Uncharacterized protein OS=Canis lupus familiaris GN=CD5L PE=4 SV=2	TRUE	23.2359	4.1662e-07	208722	23771.4	207886	19004.8	3800.49	15459	184950	8.78037	0.943513	0.11389	-3.13428
239	38	tr|A0A224YXN0|A0A224YXN0_9ACAR	N/A	N/A	Elongation factor 1-alpha OS=Rhipicephalus zambeziensis PE=3 SV=1	TRUE	-23.1281	4.283e-07	9.91405e+06	1.6631e+07	9.9997e+06	1.65474e+07	373096	445184	-6.71699e+06	0.596117	-0.224668	1.67752	0.746332
240	4	tr|F1PIX8|F1PIX8_CANLF	N/A	N/A	Complement C3 OS=Canis lupus familiaris GN=C3 PE=4 SV=2	TRUE	22.9168	4.5231e-07	4.1203e+06	772930	4.10397e+06	809793	280277	82380.9	3.34737e+06	5.33075	0.726789	0.187591	-2.41434
241	113	tr|L7M1L5|L7M1L5_9ACAR	N/A	N/A	Citrate synthase OS=Rhipicephalus pulchellus PE=2 SV=1	TRUE	-22.8905	4.554e-07	1.82917e+06	3.21439e+06	1.84379e+06	3.22057e+06	70044	98701.8	-1.38522e+06	0.569058	-0.244844	1.75729	0.813353
242	347	tr|A0A131Z3E9|A0A131Z3E9_RHIAP	N/A	N/A	40S ribosomal protein S6 OS=Rhipicephalus appendiculatus PE=3 SV=1	TRUE	-22.6305	4.8736e-07	287991	729871	292721	728658	37617.7	10485.3	-441881	0.394577	-0.403868	2.53436	1.34162
243	810	tr|A0A131YMI2|A0A131YMI2_RHIAP	N/A	N/A	Aminocarboxymuconate-semialdehyde decarboxylase OS=Rhipicephalus appendiculatus PE=4 SV=1	TRUE	22.5141	5.0253e-07	120969	53040.5	121225	52786.3	4532.88	3983.25	67928.8	2.2807	0.358067	0.438463	-1.18947
244	888	tr|L7M6Q8|L7M6Q8_9ACAR	N/A	N/A	Peptidyl-prolyl cis-trans isomerase OS=Rhipicephalus pulchellus PE=2 SV=1	TRUE	22.4878	5.0603e-07	201640	76511.6	200475	76584.2	10176.2	4504.4	125128	2.63541	0.420848	0.379447	-1.39803
245	504	tr|A0A1E1XNG1|A0A1E1XNG1_9ACAR	N/A	N/A	Putative diacetyl reductase/l-xylulose reductase (Fragment) OS=Amblyomma sculptum PE=2 SV=1	TRUE	22.3914	5.191e-07	2.07261e+06	914251	2.08878e+06	913637	103097	8714.2	1.15836e+06	2.267	0.355452	0.441111	-1.18079
246	331	tr|A0A131Z253|A0A131Z253_RHIAP	N/A	N/A	Amblyomma 40-33 family member OS=Rhipicephalus appendiculatus PE=4 SV=1	TRUE	22.3179	5.2934e-07	612487	182359	608702	183220	32044.2	21422.7	430128	3.35868	0.526169	0.297736	-1.7479
247	488	tr|A0A131YV69|A0A131YV69_RHIAP	N/A	N/A	Serine carboxypeptidase OS=Rhipicephalus appendiculatus PE=3 SV=1	TRUE	22.2424	5.401e-07	124368	12593.6	125325	13663.6	9651.74	2803.23	111774	9.87548	0.994558	0.101261	-3.30385
248	361	tr|G3MKS0|G3MKS0_9ACAR	N/A	N/A	Uncharacterized protein OS=Amblyomma maculatum PE=2 SV=1	TRUE	22.1677	5.5099e-07	552168	301729	548462	300567	15219.3	16700.3	250439	1.83001	0.262454	0.546445	-0.871853
249	572	tr|L7M4W5|L7M4W5_9ACAR	N/A	N/A	60S ribosomal protein L13 OS=Rhipicephalus pulchellus PE=2 SV=1	TRUE	-22.1414	5.5488e-07	395734	873762	392640	878209	11276.9	41680.9	-478028	0.452908	-0.34399	2.20795	1.14271
250	727	tr|A0A131YHK9|A0A131YHK9_RHIAP	N/A	N/A	Glutathione S-transferase OS=Rhipicephalus appendiculatus PE=4 SV=1	TRUE	22.0753	5.6482e-07	220926	111053	221232	111911	7518.19	6524.3	109873	1.98937	0.298716	0.502671	-0.992313
251	732	tr|C9W1M1|C9W1M1_RHISA	N/A	N/A	Mitochondrial ATP synthase epsilon chain OS=Rhipicephalus sanguineus PE=2 SV=1	TRUE	-21.9255	5.8812e-07	193439	309283	193449	307645	2205.56	10334.4	-115844	0.625442	-0.203813	1.59887	0.677052
252	66	tr|A0A224Z2Z6|A0A224Z2Z6_9ACAR	N/A	N/A	KSR 2 misexpression suppressor OS=Rhipicephalus zambeziensis PE=4 SV=1	TRUE	-21.9181	5.893e-07	659328	955114	661739	952484	10719.5	24770.3	-295787	0.690313	-0.160954	1.44862	0.534678
253	346	tr|A0A131XEY6|A0A131XEY6_9ACAR	N/A	N/A	Uncharacterized protein OS=Hyalomma excavatum PE=2 SV=1	TRUE	-21.8569	5.9916e-07	196266	429965	200128	431663	20813.8	4907.25	-233699	0.45647	-0.340587	2.19072	1.13141
254	296	tr|L7M6A8|L7M6A8_9ACAR	N/A	N/A	Putative ribosomal protein s23 OS=Rhipicephalus pulchellus PE=2 SV=1	TRUE	-21.842	6.0159e-07	550660	1.44909e+06	554933	1.43255e+06	40536.8	71585.8	-898431	0.380004	-0.420212	2.63155	1.39592
255	182	tr|A0A224YG94|A0A224YG94_9ACAR	N/A	N/A	Phosphoglycerate kinase OS=Rhipicephalus zambeziensis PE=3 SV=1	TRUE	-21.7798	6.1185e-07	1.03481e+06	1.5008e+06	1.03219e+06	1.50305e+06	37525.3	20565	-465989	0.689507	-0.161461	1.45031	0.536363
256	590	tr|L7ML89|L7ML89_9ACAR	N/A	N/A	40S ribosomal protein S26 (Fragment) OS=Rhipicephalus pulchellus PE=2 SV=1	TRUE	-21.6931	6.2652e-07	419354	1.18864e+06	411045	1.18505e+06	58261.4	40446.1	-769284	0.352802	-0.452469	2.83445	1.50307
257	107	tr|A0A224YYZ8|A0A224YYZ8_9ACAR	N/A	N/A	Fructose-bisphosphate aldolase OS=Rhipicephalus zambeziensis PE=3 SV=1	TRUE	-21.5886	6.4472e-07	4.15243e+06	6.03381e+06	4.11878e+06	6.03848e+06	145656	95722.7	-1.88138e+06	0.688193	-0.16229	1.45308	0.539115
258	537	tr|L7M7D4|L7M7D4_9ACAR	N/A	N/A	Putative nadh:ubiquinone oxidoreductase ndufv2/24 kd subunit OS=Rhipicephalus pulchellus PE=2 SV=1	TRUE	-21.5571	6.5033e-07	102944	170583	104272	168869	3592.63	5145.18	-67639	0.603484	-0.219335	1.65705	0.728614
259	677	tr|L7M3F0|L7M3F0_9ACAR	N/A	N/A	Uncharacterized protein OS=Rhipicephalus pulchellus PE=2 SV=1	TRUE	-21.4329	6.7301e-07	224395	451911	221366	453150	8559.83	19428.6	-227517	0.496545	-0.304041	2.01391	1.01
260	160	tr|L7M6S1|L7M6S1_9ACAR	N/A	N/A	Putative heat shock-related protein OS=Rhipicephalus pulchellus PE=2 SV=1	TRUE	21.4176	6.7587e-07	1.49816e+06	1.01379e+06	1.4961e+06	1.00694e+06	38136.3	24320.1	484369	1.47778	0.169609	0.676691	-0.56343
261	85	tr|A0A131Z4L0|A0A131Z4L0_RHIAP	N/A	N/A	Glutathione S-transferase OS=Rhipicephalus appendiculatus PE=4 SV=1	TRUE	21.3555	6.8761e-07	1.65524e+06	487519	1.66464e+06	520644	48338.7	98096.5	1.16772e+06	3.39522	0.530868	0.294532	-1.76351
262	606	sp|P49822|ALBU_CANLF	N/A	N/A	Serum albumin OS=Canis lupus familiaris GN=ALB PE=1 SV=3	TRUE	21.3545	6.8781e-07	218220	40499.8	216938	40623.5	16620.4	901.021	177720	5.38817	0.731442	0.185592	-2.4298
263	720	tr|A0A023FM57|A0A023FM57_9ACAR	N/A	N/A	Putative tick serpins 14 OS=Amblyomma cajennense PE=2 SV=1	TRUE	21.3198	6.9446e-07	113567	67751.4	113195	68982.4	1624.55	3979.05	45815.3	1.67623	0.224333	0.596578	-0.745218
264	126	tr|A0A131XPK7|A0A131XPK7_9ACAR	N/A	N/A	Putative basement membrane-specific heparan sulfate proteoglycan core protein (Fragment) OS=Hyalomma excavatum PE=2 SV=1	TRUE	-21.3106	6.9625e-07	457887	822556	464054	827947	16484.4	29992.7	-364669	0.556664	-0.254407	1.79642	0.845122
265	613	tr|L7LYQ8|L7LYQ8_9ACAR	N/A	N/A	Putative glycine rich protein OS=Rhipicephalus pulchellus PE=2 SV=1	TRUE	21.3043	6.9746e-07	81270.1	27123.6	81767.9	27604.8	4739.94	1836.11	54146.5	2.99629	0.476584	0.333746	-1.58318
266	97	tr|A0A224YYF6|A0A224YYF6_9ACAR	N/A	N/A	Guanine nucleotide-binding protein OS=Rhipicephalus zambeziensis PE=4 SV=1	TRUE	-21.1281	7.3268e-07	1.0758e+06	2.02956e+06	1.06928e+06	2.02762e+06	71985.9	54490.2	-953764	0.530064	-0.275671	1.88656	0.91576
267	313	tr|L7LY05|L7LY05_9ACAR	N/A	N/A	Isocitrate dehydrogenase [NAD] subunit, mitochondrial OS=Rhipicephalus pulchellus PE=2 SV=1	TRUE	-21.1042	7.3762e-07	71068	237082	70773.5	237449	6384.66	14379	-166014	0.299762	-0.523224	3.33598	1.73811
268	390	tr|A0A131XKX7|A0A131XKX7_9ACAR	N/A	N/A	Putative aconitase/aconitase aconitase superfamily OS=Hyalomma excavatum PE=2 SV=1	TRUE	21.0766	7.4337e-07	153535	72870.2	154487	70644.9	2777.72	7132.71	80665.2	2.10697	0.323658	0.474615	-1.07517
269	908	tr|A0A131XGJ6|A0A131XGJ6_9ACAR	N/A	N/A	Putative m20 domain-containing peptidase (Fragment) OS=Hyalomma excavatum PE=2 SV=1	TRUE	21.0657	7.4565e-07	63460.9	17486.5	64244.1	17271.1	3971.74	1810.33	45974.4	3.62914	0.559804	0.275547	-1.85963
270	454	tr|L7M666|L7M666_9ACAR	N/A	N/A	Putative small nuclear ribonucleoprotein sm d3 OS=Rhipicephalus pulchellus PE=2 SV=1	TRUE	-20.9822	7.6341e-07	366233	513095	367493	511671	13250.8	4514.35	-146862	0.713772	-0.146441	1.40101	0.486465
271	517	tr|L7MDZ5|L7MDZ5_9ACAR	N/A	N/A	Putative neurofilament heavy polypeptide (Fragment) OS=Rhipicephalus pulchellus PE=2 SV=1	TRUE	-20.9333	7.7406e-07	96680.8	230741	94180.5	233144	9341.27	8763.21	-134060	0.419002	-0.377784	2.38663	1.25497
272	206	tr|A0A224Z4W7|A0A224Z4W7_9ACAR	N/A	N/A	Myosin regulatory light chain ef hand protein superfamily OS=Rhipicephalus zambeziensis PE=4 SV=1	TRUE	-20.8904	7.8352e-07	1.32334e+06	1.70222e+06	1.31899e+06	1.69397e+06	25637.8	25658.7	-378870	0.777425	-0.109341	1.2863	0.363224
273	437	tr|A0A224Z2T5|A0A224Z2T5_9ACAR	N/A	N/A	Large subunit ribosomal protein L3e OS=Rhipicephalus zambeziensis PE=3 SV=1	TRUE	-20.8856	7.8459e-07	215701	373712	217785	378904	6619.88	13606.1	-158011	0.577186	-0.238685	1.73255	0.792893
274	617	tr|L7M456|L7M456_9ACAR	N/A	N/A	Transcription factor BTF3 OS=Rhipicephalus pulchellus PE=2 SV=1	TRUE	-20.8448	7.9374e-07	81895.7	190700	81980.3	191565	2621.69	10104.9	-108804	0.429448	-0.367089	2.32857	1.21944
275	429	tr|A0A224Z2W7|A0A224Z2W7_9ACAR	N/A	N/A	Large subunit ribosomal protein LP1 OS=Rhipicephalus zambeziensis PE=3 SV=1	TRUE	20.6937	8.2872e-07	551245	391601	545477	390043	14137.6	6179.87	159644	1.40767	0.148501	0.710394	-0.493309
276	74	tr|A0A224Z295|A0A224Z295_9ACAR	N/A	N/A	Protein disulfide-isomerase OS=Rhipicephalus zambeziensis PE=3 SV=1	TRUE	-20.6765	8.3281e-07	1.09797e+06	1.40695e+06	1.09581e+06	1.40922e+06	28732.3	8226	-308976	0.780393	-0.107687	1.28141	0.357727
277	360	tr|L7LS09|L7LS09_9ACAR	N/A	N/A	Putative bitil peptide OS=Rhipicephalus pulchellus PE=2 SV=1	TRUE	20.5956	8.524e-07	274572	142778	274245	142360	11533.5	5547.33	131794	1.92307	0.283994	0.520003	-0.943408
278	909	tr|E2R917|E2R917_CANLF	N/A	N/A	Keratin 75 OS=Canis lupus familiaris GN=KRT75 PE=3 SV=2	TRUE	-20.4431	8.9078e-07	52004.8	84836.9	50931.6	84082.2	2286.52	2255.91	-32832.2	0.612997	-0.212542	1.63133	0.706048
279	379	tr|A0A224YRZ4|A0A224YRZ4_9ACAR	N/A	N/A	Isocitrate dehydrogenase [NAD] subunit, mitochondrial OS=Rhipicephalus zambeziensis PE=3 SV=1	TRUE	-20.4366	8.9247e-07	55842.4	123724	55349.8	123676	2706.87	6066.69	-67881.9	0.451346	-0.345491	2.2156	1.1477
280	42	tr|A0A131Z680|A0A131Z680_RHIAP	N/A	N/A	Trifunctional purine biosynthetic protein adenosine-3 OS=Rhipicephalus appendiculatus PE=3 SV=1	TRUE	20.4004	9.0188e-07	914731	533562	914761	517862	17678.3	32922.7	381169	1.71439	0.234108	0.5833	-0.777691
281	917	tr|A0A224Y9I2|A0A224Y9I2_9ACAR	N/A	N/A	Glycine rich superfamily member (Fragment) OS=Rhipicephalus zambeziensis PE=4 SV=1	TRUE	-20.3378	9.1845e-07	15654.8	157453	15407	157860	10089.5	9625.22	-141798	0.0994254	-1.0025	10.0578	3.33024
282	181	tr|A0A131Z2K3|A0A131Z2K3_RHIAP	N/A	N/A	Uncharacterized protein OS=Rhipicephalus appendiculatus PE=4 SV=1	TRUE	-20.1646	9.6619e-07	208132	319030	210770	320356	7918.28	7634.42	-110898	0.65239	-0.185493	1.53283	0.616193
283	736	tr|A0A131YLL6|A0A131YLL6_RHIAP	N/A	N/A	Toll-like receptor 5 OS=Rhipicephalus appendiculatus PE=4 SV=1	TRUE	20.0668	9.9443e-07	87727.1	38204.9	87967.6	38218.1	4586.4	1823.88	49522.3	2.29623	0.361015	0.435496	-1.19927
284	645	tr|J9PAX5|J9PAX5_CANLF	N/A	N/A	Uncharacterized protein OS=Canis lupus familiaris PE=4 SV=1	TRUE	20.0465	1.0004e-06	678321	73490.7	702966	72937.6	60234.4	3615.34	604831	9.23003	0.965203	0.108342	-3.20634
285	907	tr|A0A1E1X921|A0A1E1X921_9ACAR	N/A	N/A	Galectin OS=Amblyomma aureolatum PE=2 SV=1	TRUE	-20.0428	1.0015e-06	300385	422670	302728	423021	7445.07	9668.03	-122286	0.710683	-0.148324	1.4071	0.492722
286	693	tr|A0A224YMH7|A0A224YMH7_9ACAR	N/A	N/A	Adenylate kinase OS=Rhipicephalus zambeziensis PE=3 SV=1	TRUE	-19.994	1.0161e-06	141656	269632	141168	265457	2490.89	12556.8	-127976	0.525369	-0.279536	1.90342	0.928597
287	1070	tr|A0A224Y3W3|A0A224Y3W3_9ACAR	N/A	N/A	Glycine rich superfamily member OS=Rhipicephalus zambeziensis PE=4 SV=1	TRUE	-19.9158	1.0399e-06	337633	3.38562e+06	373358	3.47168e+06	126887	278548	-3.04799e+06	0.0997253	-1.00119	10.0275	3.3259
288	250	tr|A0A224YSU8|A0A224YSU8_9ACAR	N/A	N/A	M20 domain containing peptidase OS=Rhipicephalus zambeziensis PE=4 SV=1	TRUE	19.7743	1.0848e-06	223445	79199.4	220742	81152.4	12375.8	7725.58	144246	2.8213	0.450449	0.354447	-1.49636
289	341	tr|L7LXM2|L7LXM2_9ACAR	N/A	N/A	Uncharacterized protein OS=Rhipicephalus pulchellus PE=2 SV=1	TRUE	-19.6727	1.1183e-06	166013	319856	163998	318012	13427.8	8019.38	-153843	0.519023	-0.284813	1.9267	0.946128
290	64	tr|A0A131YYA2|A0A131YYA2_RHIAP	N/A	N/A	Isocitrate dehydrogenase [NADP] OS=Rhipicephalus appendiculatus PE=3 SV=1	TRUE	19.6382	1.13e-06	321286	157920	320803	156700	11356.6	12158.7	163365	2.03448	0.308454	0.491526	-1.02466
291	1076	tr|L7M3M1|L7M3M1_9ACAR	N/A	N/A	Putative ran-specific gtpase-activating protein OS=Rhipicephalus pulchellus PE=2 SV=1	TRUE	-19.5549	1.1588e-06	56469.1	78936.2	56380.5	78973.8	508.081	2240.96	-22467	0.715377	-0.145465	1.39786	0.483224
292	291	tr|V5I1L1|V5I1L1_IXORI	N/A	N/A	Putative ribosomal protein l30 (Fragment) OS=Ixodes ricinus PE=2 SV=1	TRUE	-19.5348	1.1659e-06	380676	1.0403e+06	388710	1.04972e+06	53908.8	40676.4	-659622	0.36593	-0.436602	2.73276	1.45036
293	651	tr|F1Q421|F1Q421_CANLF	N/A	N/A	Plasminogen OS=Canis lupus familiaris GN=PLG PE=3 SV=2	TRUE	19.5313	1.1671e-06	174343	16503	175813	16505.2	15215.3	5452.56	157840	10.5643	1.02384	0.0946586	-3.40112
294	725	tr|A0A131YEJ6|A0A131YEJ6_RHIAP	N/A	N/A	Uncharacterized protein OS=Rhipicephalus appendiculatus PE=4 SV=1	TRUE	19.528	1.1683e-06	2.01721e+06	500573	2.01373e+06	497617	147003	50170.8	1.51663e+06	4.0298	0.605283	0.248151	-2.01071
295	568	tr|L7M653|L7M653_9ACAR	N/A	N/A	Uncharacterized protein OS=Rhipicephalus pulchellus PE=2 SV=1	TRUE	-19.467	1.1901e-06	837375	1.18184e+06	825947	1.17983e+06	32073.6	14956.7	-344463	0.708536	-0.149638	1.41136	0.497087
296	1057	tr|V5HV87|V5HV87_IXORI	N/A	N/A	Putative tnf receptor-associated factor 4 OS=Ixodes ricinus PE=2 SV=1	TRUE	-19.4367	1.2011e-06	121144	400287	120466	403885	10099.1	26889.3	-279143	0.302642	-0.51907	3.30423	1.72431
297	541	tr|L7MAT6|L7MAT6_9ACAR	N/A	N/A	Putative peptide chain release factor 1 erf1 OS=Rhipicephalus pulchellus PE=2 SV=1	TRUE	-19.4298	1.2037e-06	49245	160995	49028.8	157756	2174.14	11295.6	-111750	0.30588	-0.514449	3.26926	1.70896
298	883	tr|A0A131YU14|A0A131YU14_RHIAP	N/A	N/A	Dihydropyrimidinase OS=Rhipicephalus appendiculatus PE=4 SV=1	TRUE	-19.4216	1.2067e-06	121655	163802	121732	163563	1302.88	4140.02	-42146.7	0.742697	-0.129188	1.34644	0.429154
299	263	tr|A0A224YGE4|A0A224YGE4_9ACAR	N/A	N/A	60s ribosomal protein l7a OS=Rhipicephalus zambeziensis PE=4 SV=1	TRUE	-19.4089	1.2114e-06	768628	1.23696e+06	759913	1.23464e+06	36302.8	31798.5	-468337	0.621382	-0.206641	1.60932	0.686447
300	663	tr|V5HWG4|V5HWG4_IXORI	N/A	N/A	Putative rbp1-like protein OS=Ixodes ricinus PE=2 SV=1	TRUE	-19.3535	1.232e-06	119947	296309	121579	293328	7105.54	16783.1	-176362	0.404804	-0.392755	2.47033	1.3047
301	679	tr|G3MQS2|G3MQS2_9ACAR	N/A	N/A	Uncharacterized protein OS=Amblyomma maculatum PE=2 SV=1	TRUE	19.2742	1.2624e-06	382025	145072	383963	145721	24273.4	3918.83	236954	2.63335	0.420509	0.379744	-1.3969
302	22	tr|A0A131ZDX3|A0A131ZDX3_RHIAP	N/A	N/A	TIL domain containing protein (Fragment) OS=Rhipicephalus appendiculatus PE=4 SV=1	TRUE	19.2628	1.2668e-06	1.10058e+06	722577	1.08849e+06	722552	36478.5	14479.6	378006	1.52314	0.182739	0.65654	-0.607045
303	889	tr|A0A224YML7|A0A224YML7_9ACAR	N/A	N/A	ADP-sugar pyrophosphatase / 8-oxo-dGDP phosphatase OS=Rhipicephalus zambeziensis PE=4 SV=1	TRUE	19.2213	1.283e-06	419535	168909	408535	167093	25140.7	6928.23	250626	2.48379	0.395115	0.40261	-1.31254
304	274	tr|A0A224YPB5|A0A224YPB5_9ACAR	N/A	N/A	Heat shock protein OS=Rhipicephalus zambeziensis PE=3 SV=1	TRUE	-19.0221	1.3646e-06	1.96196e+06	3.01425e+06	1.95827e+06	3.0029e+06	81546.8	74773.7	-1.05229e+06	0.650894	-0.18649	1.53635	0.619506
305	536	tr|L7LYW8|L7LYW8_9ACAR	N/A	N/A	Serine/threonine-protein phosphatase OS=Rhipicephalus pulchellus PE=2 SV=1	TRUE	-19.0204	1.3653e-06	96122.7	168624	96066.2	170659	5079.72	5684.55	-72501.1	0.570042	-0.244093	1.75426	0.810859
306	798	tr|A0A023GKA4|A0A023GKA4_9ACAR	N/A	N/A	Putative ubiquinol cytochrome c reductase subunit qcr2 OS=Amblyomma triste PE=2 SV=1	TRUE	-18.972	1.386e-06	64593.9	128272	65703.3	127674	3821.13	5519.19	-63678.2	0.503569	-0.297941	1.98582	0.989738
307	803	tr|L7MKF4|L7MKF4_9ACAR	N/A	N/A	Phosphoinositide phospholipase C (Fragment) OS=Rhipicephalus pulchellus PE=2 SV=1	TRUE	-18.8292	1.4493e-06	773.728	13614	741.99	14154.8	318.898	1326.06	-12840.3	0.0568333	-1.2454	17.5953	4.13712
308	898	tr|A0A034WX82|A0A034WX82_RHIMP	N/A	N/A	Chitinase_1 OS=Rhipicephalus microplus PE=4 SV=1	TRUE	18.6839	1.5173e-06	334964	205785	331935	205320	11709.9	7354.33	129179	1.62774	0.211584	0.614351	-0.702866
309	1023	tr|B7PTS0|B7PTS0_IXOSC	N/A	N/A	GMP reductase (Fragment) OS=Ixodes scapularis GN=8031240 PE=3 SV=1	TRUE	-18.6503	1.5335e-06	9014.32	23967.1	9027.42	23486.9	615.202	1480.78	-14952.8	0.376112	-0.424683	2.65878	1.41077
310	995	tr|A0A131YI91|A0A131YI91_RHIAP	N/A	N/A	Cuticle protein OS=Rhipicephalus appendiculatus PE=4 SV=1	TRUE	18.6228	1.5469e-06	261992	173697	260352	172441	7973.52	5132.17	88294.7	1.50833	0.178495	0.662987	-0.592948
311	79	tr|L7M2C1|L7M2C1_9ACAR	N/A	N/A	Putative prohibitin OS=Rhipicephalus pulchellus PE=2 SV=1	TRUE	-18.5728	1.5717e-06	943833	1.83556e+06	965810	1.83719e+06	89574.2	34600.3	-891724	0.514194	-0.288873	1.94479	0.959614
312	1005	tr|A0A224YR96|A0A224YR96_9ACAR	N/A	N/A	Tick serine protease OS=Rhipicephalus zambeziensis PE=3 SV=1	TRUE	18.567	1.5746e-06	151525	14527.6	148919	12466.4	11885.4	8747.03	136998	10.4302	1.01829	0.0958757	-3.38269
313	557	tr|A0A224Z497|A0A224Z497_9ACAR	N/A	N/A	Microsomal triglyceride transfer protein large subunit OS=Rhipicephalus zambeziensis PE=4 SV=1	TRUE	18.4093	1.656e-06	103867	52896.7	104647	52335.5	4022.17	3805.93	50969.9	1.96357	0.293047	0.509275	-0.973482
314	1058	tr|A0A147BF63|A0A147BF63_IXORI	N/A	N/A	Uncharacterized protein OS=Ixodes ricinus PE=4 SV=1	TRUE	-18.3748	1.6745e-06	170161	493749	172995	489369	11937.5	33136.1	-323588	0.34463	-0.462647	2.90166	1.53688
315	733	tr|A0A224Z550|A0A224Z550_9ACAR	N/A	N/A	Nebulin repeat protein OS=Rhipicephalus zambeziensis PE=4 SV=1	TRUE	-18.2774	1.7279e-06	102342	349747	113912	351954	25171.8	9964.32	-247405	0.292618	-0.533699	3.41743	1.77291
316	673	tr|A0A224Z7D1|A0A224Z7D1_9ACAR	N/A	N/A	Pyruvate dehydrogenase E1 component beta subunit OS=Rhipicephalus zambeziensis PE=4 SV=1	TRUE	-18.2527	1.7418e-06	122442	177481	122040	177248	3784.43	4695.6	-55039.1	0.689887	-0.161222	1.44951	0.535568
317	726	tr|C9W1K5|C9W1K5_RHISA	N/A	N/A	Putative cement protein (Fragment) OS=Rhipicephalus sanguineus PE=2 SV=1	TRUE	-18.105	1.8274e-06	9117.84	282663	8353.31	271242	6199.15	29575.1	-273546	0.0322569	-1.49138	31.0011	4.95425
318	848	tr|C9W1H9|C9W1H9_RHISA	N/A	N/A	NADH dehydrogenase 1 alpha subcomplex OS=Rhipicephalus sanguineus PE=2 SV=1	TRUE	-18.1037	1.8281e-06	84517.3	113675	84386.9	114019	2585.75	1920.97	-29158	0.743497	-0.128721	1.34499	0.4276
319	687	tr|F1PNH6|F1PNH6_CANLF	N/A	N/A	Selenium binding protein 1 OS=Canis lupus familiaris GN=SELENBP1 PE=4 SV=2	TRUE	17.9646	1.9134e-06	59129.2	13789.6	58385.3	14256.1	4252.57	2719.32	45339.7	4.28796	0.632251	0.233211	-2.10029
320	460	tr|H9GWG4|H9GWG4_CANLF	N/A	N/A	Inter-alpha-trypsin inhibitor heavy chain 3 OS=Canis lupus familiaris GN=ITIH3 PE=4 SV=2	TRUE	17.8736	1.9716e-06	112764	15944.9	112109	13176	6306.41	8809.03	96818.8	7.07208	0.849547	0.141401	-2.82214
321	1046	tr|A0A131YX63|A0A131YX63_RHIAP	N/A	N/A	Adenylosuccinate lyase OS=Rhipicephalus appendiculatus PE=3 SV=1	TRUE	17.8234	2.0046e-06	86377.3	52899.3	86667.9	52785.2	3415.65	1563.86	33478	1.63286	0.21295	0.612421	-0.707405
322	760	tr|L7MAV8|L7MAV8_9ACAR	N/A	N/A	Putative cysteine desulfurase nfs1 OS=Rhipicephalus pulchellus PE=2 SV=1	TRUE	17.7675	2.0421e-06	178200	92790.9	178824	91918.9	7493.61	6022.96	85409	1.92045	0.283402	0.520712	-0.941442
323	345	tr|A0A131YF77|A0A131YF77_RHIAP	N/A	N/A	Elongation factor 1-gamma OS=Rhipicephalus appendiculatus PE=4 SV=1	TRUE	-17.7323	2.0661e-06	58614.1	89910.9	59335.7	89509.4	2391.13	2596.69	-31296.8	0.651913	-0.18581	1.53395	0.617248
324	783	tr|L7ME81|L7ME81_9ACAR	N/A	N/A	Putative phospholipase a2 (Fragment) OS=Rhipicephalus pulchellus PE=2 SV=1	TRUE	-17.7169	2.0768e-06	90073.9	141445	91167.4	141761	5568.27	1619.9	-51371.1	0.636812	-0.195988	1.57032	0.65106
325	235	tr|A0A224Z5E7|A0A224Z5E7_9ACAR	N/A	N/A	Pyruvate dehydrogenase E1 component subunit alpha OS=Rhipicephalus zambeziensis PE=4 SV=1	TRUE	-17.6937	2.0929e-06	250604	448933	255839	446159	16151.4	15546.8	-198329	0.558221	-0.253194	1.7914	0.841091
326	240	tr|L7M6Z0|L7M6Z0_9ACAR	N/A	N/A	Putative rap1a member of ras oncoprotein family OS=Rhipicephalus pulchellus PE=2 SV=1	TRUE	-17.6934	2.0931e-06	581751	910542	583290	906717	34272.4	14376.1	-328791	0.638906	-0.194563	1.56518	0.646324
327	234	tr|A0A224YIC5|A0A224YIC5_9ACAR	N/A	N/A	4-hydroxyphenylpyruvate dioxygenase OS=Rhipicephalus zambeziensis PE=3 SV=1	TRUE	-17.6628	2.1146e-06	512997	676126	515253	678445	13548.6	12555.1	-163129	0.75873	-0.119913	1.31799	0.398342
328	277	tr|L7M580|L7M580_9ACAR	N/A	N/A	Putative abc transporter OS=Rhipicephalus pulchellus PE=2 SV=1	TRUE	17.657	2.1187e-06	64518.8	15284.2	64555.9	15320.9	1920.21	5235.77	49234.5	4.22126	0.625443	0.236896	-2.07768
329	778	tr|V5HCH2|V5HCH2_IXORI	N/A	N/A	Putative cell-matrix adhesion OS=Ixodes ricinus PE=2 SV=1	TRUE	-17.6484	2.1248e-06	50161.2	185115	50171	190366	5100.04	14418.2	-134954	0.270972	-0.567075	3.69041	1.88378
330	51	tr|A0A224Z4Y6|A0A224Z4Y6_9ACAR	N/A	N/A	Protein disulfide-isomerase OS=Rhipicephalus zambeziensis PE=3 SV=1	TRUE	-17.6298	2.1381e-06	1.17343e+06	1.65852e+06	1.17582e+06	1.64999e+06	40517.1	37238.8	-485088	0.707518	-0.150263	1.41339	0.499162
331	63	tr|L7M8R8|L7M8R8_9ACAR	N/A	N/A	Adenosylhomocysteinase OS=Rhipicephalus pulchellus PE=2 SV=1	TRUE	17.5672	2.1834e-06	1.65952e+06	1.16635e+06	1.66183e+06	1.18252e+06	27483.2	48961	493174	1.42284	0.153155	0.702822	-0.508769
332	904	tr|A0A023G859|A0A023G859_9ACAR	N/A	N/A	Putative cysteine proteinase ixodes scapularis cysteine proteinase OS=Amblyomma triste PE=2 SV=1	TRUE	-17.5007	2.2328e-06	407785	1.0649e+06	409955	1.04102e+06	32947	67482.5	-657117	0.382932	-0.416878	2.61143	1.38484
333	788	tr|A0A1E1X5Y9|A0A1E1X5Y9_9ACAR	N/A	N/A	Sorting nexin OS=Amblyomma aureolatum PE=2 SV=1	TRUE	-17.4935	2.2382e-06	102441	158426	102807	157731	3863.72	5102.93	-55984.9	0.646619	-0.189352	1.54651	0.629012
334	121	tr|A0A224Z2M8|A0A224Z2M8_9ACAR	N/A	N/A	Isocitrate dehydrogenase [NADP] OS=Rhipicephalus zambeziensis PE=3 SV=1	TRUE	17.4921	2.2393e-06	1.59128e+06	1.05301e+06	1.58149e+06	1.06342e+06	51537.1	33638.5	538262	1.51116	0.179311	0.661742	-0.595659
335	961	tr|J9P7F7|J9P7F7_CANLF	N/A	N/A	Uncharacterized protein OS=Canis lupus familiaris GN=FCN2 PE=4 SV=1	TRUE	17.4507	2.2708e-06	156885	20607	153915	26429.5	9291.08	12554.5	136278	7.61317	0.881566	0.131351	-2.9285
336	209	tr|A0A131XI00|A0A131XI00_9ACAR	N/A	N/A	Putative enoyl-coa hydratase OS=Hyalomma excavatum PE=2 SV=1	TRUE	-17.4327	2.2846e-06	938709	1.31542e+06	936701	1.32701e+06	20879.2	37840.6	-376709	0.71362	-0.146533	1.40131	0.486772
337	681	tr|A0A224Z254|A0A224Z254_9ACAR	N/A	N/A	Translation initiation inhibitor OS=Rhipicephalus zambeziensis PE=4 SV=1	TRUE	17.4211	2.2937e-06	413640	246290	420081	251272	15470.4	11392.2	167350	1.67949	0.225176	0.595421	-0.748019
338	339	tr|A0A224YR66|A0A224YR66_9ACAR	N/A	N/A	Cytosolic ca2+ dependent cysteine protease OS=Rhipicephalus zambeziensis PE=3 SV=1	TRUE	17.3182	2.3752e-06	548895	357696	553880	359305	19713.9	9945.94	191199	1.53453	0.185976	0.651665	-0.617798
339	389	tr|A0A224Z5T2|A0A224Z5T2_9ACAR	N/A	N/A	Peroxiredoxin (Alkyl hydroperoxide reductase subunit C) OS=Rhipicephalus zambeziensis PE=4 SV=1	TRUE	-17.229	2.4486e-06	288687	412946	283670	412769	11701.1	8434.96	-124259	0.69909	-0.155467	1.43043	0.516449
340	190	tr|A0A224Z2T0|A0A224Z2T0_9ACAR	N/A	N/A	Purine nucleoside phosphorylase OS=Rhipicephalus zambeziensis PE=3 SV=1	TRUE	17.2044	2.4693e-06	478872	260952	476308	261377	24131	7710.64	217919	1.83509	0.263658	0.544931	-0.875853
341	495	tr|L7MGQ7|L7MGQ7_9ACAR	N/A	N/A	Putative ribose 5-phosphate isomerase (Fragment) OS=Rhipicephalus pulchellus PE=2 SV=1	TRUE	17.146	2.5194e-06	217025	143408	215128	141826	6679.56	5396.36	73616.5	1.51334	0.179935	0.660792	-0.597732
342	658	tr|A0A224YSP4|A0A224YSP4_9ACAR	N/A	N/A	S-(hydroxymethyl)glutathione dehydrogenase OS=Rhipicephalus zambeziensis PE=3 SV=1	TRUE	-17.098	2.5613e-06	197114	270876	195411	271002	6748.59	5375.97	-73761.8	0.727692	-0.138053	1.37421	0.458601
343	852	tr|A0A131Z235|A0A131Z235_RHIAP	N/A	N/A	Carboxylic ester hydrolase OS=Rhipicephalus appendiculatus PE=3 SV=1	TRUE	-17.0889	2.5694e-06	19021.2	73530.1	19169.3	74145.4	4831.05	4166.36	-54508.9	0.258686	-0.587227	3.86569	1.95073
344	10	tr|A0A131YWH0|A0A131YWH0_RHIAP	N/A	N/A	Tick thioester protein OS=Rhipicephalus appendiculatus PE=4 SV=1	TRUE	16.9972	2.6522e-06	225799	153714	225842	153453	5462.07	6489.23	72085.1	1.46896	0.167009	0.680755	-0.554792
345	779	tr|A0A224YEB4|A0A224YEB4_9ACAR	N/A	N/A	Glycine rich superfamily member (Fragment) OS=Rhipicephalus zambeziensis PE=4 SV=1	TRUE	16.9759	2.6718e-06	117259	12914.1	117811	11372.7	3311.01	11839	104345	9.07994	0.958083	0.110133	-3.18268
346	890	tr|A0A1E1X3P1|A0A1E1X3P1_9ACAR	N/A	N/A	Putative vacuolar h+-atpase v1 sector subunit a OS=Amblyomma aureolatum PE=2 SV=1	TRUE	16.9542	2.692e-06	69686.2	11954.4	69334.9	12895.9	2096.11	6479.71	57731.7	5.82932	0.765618	0.171547	-2.54333
347	315	tr|A0A224YGV9|A0A224YGV9_9ACAR	N/A	N/A	Serine protease inhibitor OS=Rhipicephalus zambeziensis PE=3 SV=1	TRUE	16.9449	2.7007e-06	1.08506e+06	526440	1.09671e+06	529400	49265.7	43819.1	558619	2.06113	0.314104	0.485172	-1.04343
348	90	tr|L7M9A4|L7M9A4_9ACAR	N/A	N/A	Putative 2-oxoglutarate dehydrogenase e1 subunit OS=Rhipicephalus pulchellus PE=2 SV=1	TRUE	-16.84	2.8014e-06	355979	1.05065e+06	349664	1.04638e+06	80061.9	19918.7	-694672	0.338817	-0.470034	2.95144	1.56142
349	951	tr|L7M444|L7M444_9ACAR	N/A	N/A	Putative secreted protein OS=Rhipicephalus pulchellus PE=2 SV=1	TRUE	16.7425	2.8989e-06	72253.5	27535.3	71706.5	26042.1	4011.74	3527.28	44718.2	2.62403	0.418969	0.381093	-1.39179
350	30	tr|A0A224Z659|A0A224Z659_9ACAR	N/A	N/A	Phosphoribosylaminoimidazolecarboxamide formyltransferase / IMP cyclohydrolase OS=Rhipicephalus zambeziensis PE=3 SV=1	TRUE	16.7088	2.9335e-06	273483	158069	275846	157060	11353.5	7870.69	115415	1.73016	0.238085	0.577982	-0.790902
351	920	tr|A0A131Z382|A0A131Z382_RHIAP	N/A	N/A	Niemann-Pick C2 protein OS=Rhipicephalus appendiculatus PE=4 SV=1	TRUE	16.6717	2.9722e-06	143438	6488.38	148235	6566.96	15796.3	4515.57	136950	22.107	1.34453	0.0452346	-4.46643
352	154	tr|A0A131YMB0|A0A131YMB0_RHIAP	N/A	N/A	PDZ and LIM domain protein Zasp OS=Rhipicephalus appendiculatus PE=4 SV=1	TRUE	-16.6654	2.9788e-06	418583	564345	418609	563412	12769.4	11955.7	-145762	0.741715	-0.129763	1.34823	0.431063
353	37	tr|G3MGQ1|G3MGQ1_9ACAR	N/A	N/A	Tubulin alpha chain (Fragment) OS=Amblyomma maculatum PE=2 SV=1	TRUE	-16.5802	3.07e-06	5.71237e+06	8.08353e+06	5.76268e+06	8.07339e+06	270884	91821.1	-2.37116e+06	0.706668	-0.150785	1.41509	0.500896
354	47	tr|A0A0C5PNS0|A0A0C5PNS0_RHISA	N/A	N/A	60S acidic ribosomal protein P0 (Fragment) OS=Rhipicephalus sanguineus PE=2 SV=1	TRUE	-16.3779	3.3001e-06	1.23481e+06	1.70003e+06	1.2379e+06	1.68965e+06	27131	49912.7	-465214	0.72635	-0.138854	1.37675	0.461264
355	640	tr|L7LZK9|L7LZK9_9ACAR	N/A	N/A	Putative translocon-associated complex trap delta subunit OS=Rhipicephalus pulchellus PE=2 SV=1	TRUE	-16.3538	3.3288e-06	76572.1	200266	76721.1	199141	10054.1	11302.6	-123694	0.382352	-0.417537	2.61539	1.38703
356	232	tr|A0A1E1XJX4|A0A1E1XJX4_9ACAR	N/A	N/A	Putative secreted protein (Fragment) OS=Amblyomma sculptum PE=2 SV=1	TRUE	16.2746	3.4253e-06	3.71523e+06	1.23722e+06	3.76759e+06	1.2557e+06	294787	76393.6	2.47801e+06	3.00289	0.47754	0.333012	-1.58635
357	405	tr|A0A224YMM2|A0A224YMM2_9ACAR	N/A	N/A	Cytochrome b5 OS=Rhipicephalus zambeziensis PE=3 SV=1	TRUE	-16.2585	3.4453e-06	208337	400705	209294	394385	14411.3	18769.4	-192369	0.519925	-0.284059	1.92335	0.943624
358	444	tr|A0A224Z4T4|A0A224Z4T4_9ACAR	N/A	N/A	Sodium/potassium-transporting ATPase subunit beta OS=Rhipicephalus zambeziensis PE=4 SV=1	TRUE	-16.1296	3.6105e-06	479451	583496	478362	584232	11154.7	6481.48	-104045	0.821687	-0.0852933	1.21701	0.283338
359	105	tr|A0A131YMS3|A0A131YMS3_RHIAP	N/A	N/A	Aldehyde dehydrogenase (NAD+) OS=Rhipicephalus appendiculatus PE=3 SV=1	TRUE	16.1275	3.6133e-06	3.06232e+06	1.67573e+06	3.07236e+06	1.68079e+06	170121	25039.8	1.38659e+06	1.82745	0.261846	0.54721	-0.869834
360	634	tr|A0A1E1X3F7|A0A1E1X3F7_9ACAR	N/A	N/A	Putative aromatic amino acid hydroxylase OS=Amblyomma aureolatum PE=2 SV=1	TRUE	-16.1114	3.6345e-06	19661.9	109406	21525.5	105600	7143.57	8548.7	-89744.5	0.179714	-0.745417	5.56438	2.47622
361	8	tr|A0A224Z539|A0A224Z539_9ACAR	N/A	N/A	Neurexin iii alpha (Fragment) OS=Rhipicephalus zambeziensis PE=4 SV=1	TRUE	-16.0225	3.7547e-06	1.29508e+06	1.49278e+06	1.29678e+06	1.48973e+06	18387.9	16458	-197699	0.867563	-0.0616988	1.15265	0.204959
362	2	tr|A0A131YQK6|A0A131YQK6_RHIAP	N/A	N/A	Titin OS=Rhipicephalus appendiculatus PE=4 SV=1	TRUE	-15.9981	3.7885e-06	1.10214e+06	1.39562e+06	1.1037e+06	1.38262e+06	11925	34698.2	-293488	0.789709	-0.102533	1.26629	0.340608
363	278	tr|J9NSS7|J9NSS7_CANLF	N/A	N/A	Leucine rich alpha-2-glycoprotein 1 OS=Canis lupus familiaris GN=LRG1 PE=4 SV=1	TRUE	15.9551	3.8489e-06	820893	195225	809221	219837	33720.2	70809.6	625668	4.20486	0.623752	0.23782	-2.07206
364	927	tr|A0A023GPB5|A0A023GPB5_9ACAR	N/A	N/A	Putative conserved membrane protein OS=Amblyomma triste PE=2 SV=1	TRUE	15.9427	3.8666e-06	166200	11828.1	171345	12169.2	18561.9	5522.36	154372	14.0513	1.14772	0.0711676	-3.81264
365	826	tr|A0A131XF26|A0A131XF26_9ACAR	N/A	N/A	Dihydrolipoamide acetyltransferase component of pyruvate dehydrogenase complex OS=Hyalomma excavatum PE=2 SV=1	TRUE	-15.925	3.8919e-06	132110	194544	132206	195108	7404.89	2578.46	-62433.7	0.679076	-0.168082	1.47259	0.558355
366	238	tr|D0E0G4|D0E0G4_RHISA	N/A	N/A	Putative chitinase OS=Rhipicephalus sanguineus PE=2 SV=1	TRUE	15.8782	3.9598e-06	216022	109988	211425	110522	12290	5228.37	106034	1.96405	0.293152	0.509152	-0.973831
367	175	tr|A0A224YQW1|A0A224YQW1_9ACAR	N/A	N/A	Serine protease inhibitor OS=Rhipicephalus zambeziensis PE=3 SV=1	TRUE	15.8103	4.0609e-06	1.25573e+06	308304	1.24462e+06	271705	47961.2	109835	947429	4.07303	0.609918	0.245517	-2.0261
368	839	tr|A0A131XL14|A0A131XL14_9ACAR	N/A	N/A	Putative 5' nucleotidase family OS=Hyalomma excavatum PE=2 SV=1	TRUE	15.7635	4.1322e-06	176319	100830	177944	101003	9164.76	2782.05	75489	1.74868	0.242709	0.571861	-0.806263
369	1020	tr|A0A034WTS6|A0A034WTS6_RHIMP	N/A	N/A	Vitellogenin 2 OS=Rhipicephalus microplus PE=4 SV=1	TRUE	15.7142	4.209e-06	90612.8	15540.3	89173.7	19671.6	4357.79	8503.11	75072.5	5.83084	0.765731	0.171502	-2.5437
370	777	tr|L7MBE1|L7MBE1_9ACAR	N/A	N/A	Putative ixoderin OS=Rhipicephalus pulchellus PE=2 SV=1	TRUE	-15.579	4.428e-06	14719.9	38073.1	14838.2	37401.2	416.352	2968.98	-23353.2	0.386622	-0.412713	2.5865	1.371
371	865	tr|A0A131XAM3|A0A131XAM3_9ACAR	N/A	N/A	Putative secreted salivary gland peptide OS=Hyalomma excavatum PE=2 SV=1	TRUE	15.5536	4.4707e-06	137094	4430.99	132712	4915.27	16891.6	2382.78	132663	30.9399	1.49052	0.0323207	-4.9514
372	850	tr|A0A147BVC5|A0A147BVC5_IXORI	N/A	N/A	Putative aconitase/aconitase aconitase superfamily protein (Fragment) OS=Ixodes ricinus PE=4 SV=1	TRUE	-15.5128	4.5403e-06	135552	266169	134400	262738	9524.42	13887.6	-130617	0.509272	-0.29305	1.96359	0.973492
373	421	tr|C9W1I2|C9W1I2_RHISA	N/A	N/A	Putative beta thymosin OS=Rhipicephalus sanguineus PE=2 SV=1	TRUE	15.5041	4.5553e-06	648547	239148	658166	243869	50371.3	15868.9	409399	2.71191	0.433275	0.368744	-1.43931
374	535	tr|L7M7Z9|L7M7Z9_9ACAR	N/A	N/A	Putative cytochrome c1 OS=Rhipicephalus pulchellus PE=2 SV=1	TRUE	-15.475	4.6058e-06	83404.8	149609	82949.5	150889	5781.42	6307.56	-66204.1	0.557485	-0.253767	1.79377	0.842994
375	756	tr|L7M136|L7M136_9ACAR	N/A	N/A	Beta-galactosidase OS=Rhipicephalus pulchellus PE=2 SV=1	TRUE	15.4638	4.6253e-06	204114	97124.1	205816	96893.7	6599.68	12162.2	106990	2.10158	0.322546	0.475832	-1.07147
376	196	tr|A0A224YID5|A0A224YID5_9ACAR	N/A	N/A	40S ribosomal protein S7 OS=Rhipicephalus zambeziensis PE=3 SV=1	TRUE	-15.4424	4.6631e-06	822295	1.28147e+06	822143	1.30502e+06	10176.1	58592.2	-459175	0.641681	-0.192681	1.55841	0.640072
377	213	tr|Q4PM14|Q4PM14_IXOSC	N/A	N/A	Ribosomal protein L31 (Fragment) OS=Ixodes scapularis GN=8026406 PE=2 SV=1	TRUE	-15.3675	4.7982e-06	500932	954543	508474	960919	33833.6	48378.3	-453612	0.524787	-0.280017	1.90554	0.930197
378	542	tr|A0A131XMF7|A0A131XMF7_9ACAR	N/A	N/A	Alpha-1,4 glucan phosphorylase (Fragment) OS=Hyalomma excavatum PE=2 SV=1	TRUE	-15.3143	4.8969e-06	381092	526945	380565	527484	16967.9	8655.48	-145853	0.72321	-0.140736	1.38272	0.467514
379	46	tr|L7M8Y4|L7M8Y4_9ACAR	N/A	N/A	Malate dehydrogenase OS=Rhipicephalus pulchellus PE=2 SV=1	TRUE	15.3035	4.9172e-06	1.83375e+06	1.41345e+06	1.82062e+06	1.42082e+06	39888.2	37764.9	420306	1.29736	0.113061	0.770795	-0.375581
380	502	tr|Q86G64|Q86G64_DERVA	N/A	N/A	40S ribosomal protein S5 OS=Dermacentor variabilis PE=2 SV=1	TRUE	-15.2452	5.0284e-06	403649	658965	403084	673309	5829.94	32983.3	-255316	0.61255	-0.212859	1.63252	0.707101
381	98	tr|A0A131YVE7|A0A131YVE7_RHIAP	N/A	N/A	Calponin OS=Rhipicephalus appendiculatus PE=4 SV=1	TRUE	15.2352	5.048e-06	2.96024e+06	1.69449e+06	2.96467e+06	1.69361e+06	94062.1	136975	1.26575e+06	1.74698	0.242289	0.572415	-0.804866
382	432	tr|A0A224YWJ9|A0A224YWJ9_9ACAR	N/A	N/A	Acetyltransferase component of pyruvate dehydrogenase complex OS=Rhipicephalus zambeziensis PE=3 SV=1	TRUE	-15.2159	5.0856e-06	107613	210594	109427	209172	9878.92	9253.61	-102981	0.510997	-0.291581	1.95696	0.968612
383	332	tr|L7M8X5|L7M8X5_9ACAR	N/A	N/A	Putative cystathionine beta-lyases/cystathionine gamma-synthase OS=Rhipicephalus pulchellus PE=2 SV=1	TRUE	15.2123	5.0927e-06	460405	78343.5	448335	78287	50134.4	3106.84	382061	5.87674	0.769137	0.170162	-2.55502
384	1064	tr|A0A131XJK0|A0A131XJK0_9ACAR	N/A	N/A	Putative nucleoside diphosphate-sugar hydrolase of the mutt nudix family OS=Hyalomma excavatum PE=2 SV=1	TRUE	15.0857	5.3485e-06	65482.8	37263.8	65911.4	37504.7	3151.52	2015.98	28219	1.75728	0.24484	0.569062	-0.813342
385	354	tr|A0A131Z3P7|A0A131Z3P7_RHIAP	N/A	N/A	Biliverdin reductase / flavin reductase OS=Rhipicephalus appendiculatus PE=4 SV=1	TRUE	15.0501	5.4232e-06	442432	249571	442185	246892	23352.3	10560.8	192862	1.77277	0.248653	0.564088	-0.826008
386	381	tr|A0A224YKA5|A0A224YKA5_9ACAR	N/A	N/A	Uncharacterized protein OS=Rhipicephalus zambeziensis PE=4 SV=1	TRUE	-15.0356	5.4538e-06	583484	802426	583715	798722	21246.1	19918.8	-218942	0.72715	-0.138376	1.37523	0.459676
387	1067	tr|F6Y3P9|F6Y3P9_CANLF	N/A	N/A	Gelsolin OS=Canis lupus familiaris GN=GSN PE=4 SV=1	TRUE	15.0193	5.4886e-06	36598.3	4276.08	37602.6	4670.77	4139.21	1179.85	32322.3	8.55885	0.932415	0.116838	-3.09742
388	696	tr|L7LTA8|L7LTA8_9ACAR	N/A	N/A	Putative group ii salivary lipocalin OS=Rhipicephalus pulchellus PE=2 SV=1	TRUE	-14.9851	5.5625e-06	92128.6	147218	92056.3	146269	5162.77	5235.02	-55089.3	0.625797	-0.203566	1.59796	0.676233
389	214	tr|A0A224Z2G3|A0A224Z2G3_9ACAR	N/A	N/A	Troponin T fast skeletal muscle OS=Rhipicephalus zambeziensis PE=4 SV=1	TRUE	-14.941	5.6596e-06	638994	2.05504e+06	645086	2.04778e+06	26610.8	187675	-1.41605e+06	0.310939	-0.507324	3.21606	1.68529
390	660	tr|L7MEG1|L7MEG1_9ACAR	N/A	N/A	Putative selenophosphate synthetase (Fragment) OS=Rhipicephalus pulchellus PE=2 SV=1	TRUE	-14.8157	5.9459e-06	221069	306601	220310	308300	10474.3	4858.23	-85532.2	0.721031	-0.142046	1.3869	0.471867
391	916	tr|G3MLU9|G3MLU9_9ACAR	N/A	N/A	Uncharacterized protein OS=Amblyomma maculatum PE=2 SV=1	TRUE	14.7951	5.9946e-06	165848	68327.1	165702	67734.8	12867.3	2867.49	97521.3	2.42727	0.385118	0.411985	-1.27933
392	523	tr|A0A224ZAU6|A0A224ZAU6_9ACAR	N/A	N/A	Triosephosphate isomerase OS=Rhipicephalus zambeziensis PE=3 SV=1	TRUE	14.7278	6.1568e-06	400038	271808	399447	273166	16307.3	6106.9	128230	1.47177	0.167839	0.679456	-0.557548
393	374	tr|A0A224Y5E8|A0A224Y5E8_9ACAR	N/A	N/A	Cubilin OS=Rhipicephalus zambeziensis PE=4 SV=1	TRUE	14.7271	6.1586e-06	340115	242878	343239	242171	12130.3	5218.5	97236.7	1.40035	0.146237	0.714107	-0.485789
394	16	tr|A0A224YPA7|A0A224YPA7_9ACAR	N/A	N/A	Heat shock 70kDa protein 1/8 OS=Rhipicephalus zambeziensis PE=3 SV=1	TRUE	-14.7101	6.2004e-06	3.39377e+06	4.79056e+06	3.42964e+06	4.8105e+06	159721	102735	-1.39679e+06	0.708429	-0.149704	1.41157	0.497306
395	183	tr|L7M9N9|L7M9N9_9ACAR	N/A	N/A	Putative kh-type splicing regulatory protein OS=Rhipicephalus pulchellus PE=2 SV=1	TRUE	-14.6489	6.3537e-06	353036	527239	348629	523362	21526.6	10113.1	-174203	0.669594	-0.174188	1.49344	0.578641
396	366	tr|A0A224YZ64|A0A224YZ64_9ACAR	N/A	N/A	Glycyl-tRNA synthetase OS=Rhipicephalus zambeziensis PE=4 SV=1	TRUE	-14.6266	6.4106e-06	87203.2	172754	88811.6	170363	10008.8	6055.31	-85550.9	0.504782	-0.296896	1.98105	0.986268
397	376	tr|A0A131YRT7|A0A131YRT7_RHIAP	N/A	N/A	Salivary sulfotransferase OS=Rhipicephalus appendiculatus PE=4 SV=1	TRUE	-14.6233	6.419e-06	102809	163173	104369	162305	6777.15	4714.79	-60364.1	0.630061	-0.200618	1.58715	0.666437
398	600	tr|A0A224Y664|A0A224Y664_9ACAR	N/A	N/A	Glycine rich superfamily member (Fragment) OS=Rhipicephalus zambeziensis PE=4 SV=1	TRUE	14.6181	6.4325e-06	1.94067e+06	1.06547e+06	1.96006e+06	1.05507e+06	114293	35712.9	875206	1.82143	0.260412	0.549019	-0.865071
399	382	tr|A0A224YSE4|A0A224YSE4_9ACAR	N/A	N/A	ATP-dependent 6-phosphofructokinase OS=Rhipicephalus zambeziensis PE=3 SV=1	TRUE	14.5746	6.5457e-06	103899	22228.7	104212	23829.3	8818.93	6915.8	81670.5	4.67409	0.669697	0.213945	-2.22469
400	461	tr|K7N8D7|K7N8D7_HAELO	N/A	N/A	Cuticular protein (Fragment) OS=Haemaphysalis longicornis PE=2 SV=1	TRUE	-14.5648	6.5715e-06	251493	620387	272682	616703	46294.3	20562.8	-368894	0.405381	-0.392137	2.46682	1.30265
401	514	tr|A0A224YN39|A0A224YN39_9ACAR	N/A	N/A	Dihydrolipoyl dehydrogenase OS=Rhipicephalus zambeziensis PE=3 SV=1	TRUE	-14.3966	7.0338e-06	164064	221796	163870	222764	6916.03	4060.99	-57731.7	0.739708	-0.13094	1.35189	0.434973
402	686	tr|L7M191|L7M191_9ACAR	N/A	N/A	Putative ubiquitin-conjugating enzyme e2 OS=Rhipicephalus pulchellus PE=2 SV=1	TRUE	-14.3546	7.1552e-06	74211.8	89364.3	74187.3	88770.9	1033.02	1841.17	-15152.5	0.830441	-0.0806912	1.20418	0.26805
403	863	tr|L7ML39|L7ML39_9ACAR	N/A	N/A	Putative dna polymerase iii subunit gamma and tau (Fragment) OS=Rhipicephalus pulchellus PE=2 SV=1	TRUE	14.3114	7.2824e-06	355879	145631	358420	145683	28887.5	5367.04	210248	2.4437	0.388049	0.409215	-1.28907
404	1042	tr|F1PTZ9|F1PTZ9_CANLF	N/A	N/A	Glyceraldehyde-3-phosphate dehydrogenase OS=Canis lupus familiaris GN=GAPDH PE=3 SV=2	TRUE	14.1567	7.7606e-06	82461.7	28182	83720.9	28255.9	6337.18	4317.95	54279.6	2.92604	0.46628	0.341759	-1.54895
405	170	tr|A0A224YQG5|A0A224YQG5_9ACAR	N/A	N/A	Glutamine synthetase OS=Rhipicephalus zambeziensis PE=3 SV=1	TRUE	-14.0765	8.0226e-06	1.52064e+06	2.99349e+06	1.56104e+06	2.99621e+06	137458	157786	-1.47285e+06	0.507982	-0.294151	1.96857	0.97715
406	528	tr|A0A224YY26|A0A224YY26_9ACAR	N/A	N/A	Glycine hydroxymethyltransferase OS=Rhipicephalus zambeziensis PE=3 SV=1	TRUE	-14.0333	8.1679e-06	137179	288878	146011	291478	20716.7	6183.51	-151699	0.474869	-0.323426	2.10584	1.0744
407	3	tr|A0A131Z9Z9|A0A131Z9Z9_RHIAP	N/A	N/A	Heparan sulfate proteoglycan 2 (Fragment) OS=Rhipicephalus appendiculatus PE=4 SV=1	TRUE	-13.9999	8.2827e-06	419372	611911	415557	614795	14256.1	23523.1	-192539	0.685348	-0.164089	1.45911	0.545091
408	973	tr|B7Q730|B7Q730_IXOSC	N/A	N/A	Cuticular protein, putative OS=Ixodes scapularis GN=8036856 PE=4 SV=1	TRUE	-13.9875	8.3254e-06	125641	189847	127842	190094	5731.9	7171.09	-64205.4	0.661803	-0.179271	1.51102	0.595525
409	326	tr|F6Y713|F6Y713_CANLF	N/A	N/A	Alpha-1-acid glycoprotein OS=Canis lupus familiaris GN=LOC100685620 PE=3 SV=1	TRUE	13.946	8.4714e-06	411269	92386	424086	95754.9	42074.7	17917.7	318883	4.45163	0.648519	0.224637	-2.15433
410	602	tr|L7M9B9|L7M9B9_9ACAR	N/A	N/A	Putative amblyomma 40-33 family member OS=Rhipicephalus pulchellus PE=2 SV=1	TRUE	-13.8857	8.6885e-06	1.99515e+06	2.61519e+06	1.99482e+06	2.59334e+06	51498.8	72961.4	-620036	0.762909	-0.117527	1.31077	0.390416
411	428	tr|L7M4P7|L7M4P7_9ACAR	N/A	N/A	Putative vesicle coat complex copii gtpase subunit sar1 OS=Rhipicephalus pulchellus PE=2 SV=1	TRUE	-13.871	8.7426e-06	265104	401338	266552	401455	11850.2	15666	-136234	0.66055	-0.180094	1.51389	0.59826
412	396	tr|L7MAQ6|L7MAQ6_9ACAR	N/A	N/A	Protein arginine methyltransferase NDUFAF7 OS=Rhipicephalus pulchellus PE=2 SV=1	TRUE	-13.8703	8.745e-06	260047	391295	265107	390929	18227.8	5089.42	-131248	0.66458	-0.177453	1.50471	0.589486
413	426	tr|A0A224Z6W7|A0A224Z6W7_9ACAR	N/A	N/A	Ribosomal protein s17 OS=Rhipicephalus zambeziensis PE=3 SV=1	TRUE	-13.8599	8.7835e-06	284608	429821	281273	426693	18980.7	8878.14	-145213	0.662154	-0.179041	1.51022	0.59476
414	473	tr|A0A131YR14|A0A131YR14_RHIAP	N/A	N/A	Splicing factor, proline-and glutamine-rich OS=Rhipicephalus appendiculatus PE=4 SV=1	TRUE	-13.849	8.8239e-06	221787	327783	223696	330253	13498.9	7217.75	-105996	0.676627	-0.16965	1.47792	0.563567
415	880	tr|L7MIL3|L7MIL3_9ACAR	N/A	N/A	Putative aldehyde dehydrogenase (Fragment) OS=Rhipicephalus pulchellus PE=2 SV=1	TRUE	-13.7169	9.3318e-06	143757	255195	145541	257922	11117.8	11849	-111438	0.563323	-0.249243	1.77518	0.827967
416	93	tr|A0A131YFY5|A0A131YFY5_RHIAP	N/A	N/A	Glutathione S-transferase OS=Rhipicephalus appendiculatus PE=4 SV=1	TRUE	13.6987	9.4043e-06	3.16311e+06	2.01131e+06	3.16971e+06	1.99633e+06	148888	78170.1	1.1518e+06	1.57266	0.196635	0.635865	-0.653208
417	671	tr|L7MCC0|L7MCC0_9ACAR	N/A	N/A	Putative heat shock protein (Fragment) OS=Rhipicephalus pulchellus PE=2 SV=1	TRUE	13.6321	9.6758e-06	193543	121114	191828	121957	9737.09	4255.07	72428.8	1.59802	0.203582	0.625774	-0.676286
418	809	tr|L7M2W4|L7M2W4_9ACAR	N/A	N/A	Putative copper chaperone atox1 copper chaperone atox1 OS=Rhipicephalus pulchellus PE=2 SV=1	TRUE	13.6294	9.6869e-06	80127.8	38329.9	82152.1	38562.2	5435.33	2841.95	41797.9	2.09048	0.320245	0.47836	-1.06383
419	485	tr|L7M673|L7M673_9ACAR	N/A	N/A	Putative trna selenocysteine 1-associated protein 1 OS=Rhipicephalus pulchellus PE=2 SV=1	TRUE	13.5999	9.8101e-06	709571	427629	714009	430550	39149.6	13653.9	281942	1.65931	0.219929	0.602659	-0.730587
420	667	tr|M1H857|M1H857_RHIAP	N/A	N/A	Ferritin OS=Rhipicephalus appendiculatus GN=FER2 PE=2 SV=1	TRUE	13.4759	1.0348e-05	550018	309338	551203	305664	33276.9	12983.1	240680	1.77805	0.249943	0.562415	-0.830293
421	996	tr|A0A131YH18|A0A131YH18_RHIAP	N/A	N/A	Uncharacterized protein OS=Rhipicephalus appendiculatus PE=4 SV=1	TRUE	-13.4502	1.0465e-05	28796.4	75623.1	29766.5	74478.1	5012.14	4833.39	-46826.7	0.380789	-0.419316	2.62613	1.39294
422	480	tr|A0A224YG13|A0A224YG13_9ACAR	N/A	N/A	2-hydroxyacyl-CoA lyase 1 OS=Rhipicephalus zambeziensis PE=3 SV=1	TRUE	13.2978	1.1183e-05	165891	92804.8	164465	95067.2	9881.61	4814.74	73085.9	1.78752	0.252252	0.559433	-0.837961
423	764	tr|E2RS79|E2RS79_CANLF	N/A	N/A	Uncharacterized protein OS=Canis lupus familiaris GN=CFB PE=3 SV=2	TRUE	13.2208	1.1568e-05	141640	25617.4	133828	25512.1	17490.7	1459.96	116023	5.52907	0.742652	0.180862	-2.46704
424	699	tr|A0A224ZAI3|A0A224ZAI3_9ACAR	N/A	N/A	Transforming growth factor-beta-induced protein OS=Rhipicephalus zambeziensis PE=4 SV=1	TRUE	13.1998	1.1676e-05	132906	85903.9	133077	86492	5641.68	4346.18	47002.3	1.54715	0.189532	0.64635	-0.629613
425	970	tr|C9W1B5|C9W1B5_RHISA	N/A	N/A	Cystatin (Fragment) OS=Rhipicephalus sanguineus PE=2 SV=1	TRUE	13.1942	1.1705e-05	56474.4	13929.7	57289.7	13356.9	5851.86	2710.18	42544.7	4.05423	0.607909	0.246656	-2.01943
426	808	tr|B7PNL8|B7PNL8_IXOSC	N/A	N/A	Cysteine proteinase, putative (Fragment) OS=Ixodes scapularis GN=8053944 PE=3 SV=1	TRUE	13.1502	1.1935e-05	311266	182368	311907	184284	17965.4	7846.07	128898	1.7068	0.232183	0.585891	-0.771295
427	1	tr|A0A224YT82|A0A224YT82_9ACAR	N/A	N/A	Filamin OS=Rhipicephalus zambeziensis PE=4 SV=1	TRUE	-13.1467	1.1953e-05	1.11288e+06	1.78076e+06	1.1065e+06	1.77934e+06	98717.9	24048.5	-667886	0.624944	-0.204159	1.60014	0.678202
428	435	tr|L7M132|L7M132_9ACAR	N/A	N/A	Uncharacterized protein OS=Rhipicephalus pulchellus PE=2 SV=1	TRUE	-13.1389	1.1994e-05	159922	279490	160641	278587	17681.6	4315.09	-119568	0.572193	-0.242457	1.74766	0.805426
429	246	tr|G3MIA4|G3MIA4_9ACAR	N/A	N/A	Uncharacterized protein (Fragment) OS=Amblyomma maculatum PE=2 SV=1	TRUE	13.1251	1.2068e-05	678243	359653	670201	363883	34700.1	33951.1	318591	1.88583	0.275502	0.530271	-0.915199
430	321	tr|L7LYL1|L7LYL1_9ACAR	N/A	N/A	Eukaryotic translation initiation factor 3 subunit D OS=Rhipicephalus pulchellus PE=2 SV=1	TRUE	-13.1238	1.2075e-05	59764.4	99107.9	59216.4	99257.7	4723.63	3692.75	-39343.4	0.603024	-0.219665	1.65831	0.729712
431	18	tr|A0A131YYS7|A0A131YYS7_RHIAP	N/A	N/A	ATP synthase subunit beta OS=Rhipicephalus appendiculatus PE=3 SV=1	TRUE	-13.0186	1.2654e-05	9.0792e+06	1.75399e+07	8.96503e+06	1.76448e+07	1.265e+06	298724	-8.46074e+06	0.51763	-0.285981	1.93188	0.950007
432	253	tr|Q2V829|Q2V829_9ACAR	N/A	N/A	Troponin I protein OS=Rhipicephalus haemaphysaloides haemaphysaloides PE=2 SV=1	TRUE	-12.9841	1.2851e-05	1.46017e+06	1.81106e+06	1.45782e+06	1.82243e+06	43087.8	32629.3	-350885	0.806254	-0.0935281	1.2403	0.310694
433	353	tr|L7M6A6|L7M6A6_9ACAR	N/A	N/A	Profilin OS=Rhipicephalus pulchellus PE=2 SV=1	TRUE	-12.9327	1.3152e-05	640117	953349	632628	962655	29378.1	38514.9	-313232	0.671441	-0.172992	1.48933	0.574668
434	785	tr|L7M537|L7M537_9ACAR	N/A	N/A	Putative mitogen inducible protein product OS=Rhipicephalus pulchellus PE=2 SV=1	TRUE	-12.8765	1.3489e-05	21016.4	42034	20976.9	42572.8	2243.87	2371.07	-21017.6	0.499985	-0.301043	2.00006	1.00004
435	749	tr|G3MN19|G3MN19_9ACAR	N/A	N/A	Uncharacterized protein OS=Amblyomma maculatum PE=2 SV=1	TRUE	-12.8271	1.3794e-05	27053.7	213080	26723.5	213756	25517	13790.9	-186026	0.126965	-0.896316	7.87619	2.9775
436	763	tr|J9P4H9|J9P4H9_CANLF	N/A	N/A	Keratin 13 OS=Canis lupus familiaris GN=KRT13 PE=3 SV=1	TRUE	-12.7569	1.4241e-05	64294.6	153822	64621	152945	4225.35	13384.8	-89527.1	0.417981	-0.378843	2.39245	1.25849
437	837	tr|A0A224YDI8|A0A224YDI8_9ACAR	N/A	N/A	Glycine rich superfamily member OS=Rhipicephalus zambeziensis PE=4 SV=1	TRUE	12.7242	1.4455e-05	321196	170080	314598	171163	20936.8	11217.3	151115	1.88849	0.276115	0.529523	-0.917236
438	54	tr|A0A224Z095|A0A224Z095_9ACAR	N/A	N/A	Heat shock 70kDa protein 5 OS=Rhipicephalus zambeziensis PE=3 SV=1	TRUE	12.7077	1.4564e-05	1.16141e+06	714164	1.16574e+06	717334	48743.7	50781.8	447248	1.62625	0.211188	0.61491	-0.701552
439	635	tr|E2QYU2|E2QYU2_CANLF	N/A	N/A	Clusterin OS=Canis lupus familiaris GN=CLU PE=3 SV=1	TRUE	12.6014	1.5293e-05	125810	18399.2	125168	16015.5	13640.7	10224.7	107411	6.83778	0.834915	0.146246	-2.77353
440	1043	tr|L7LZG3|L7LZG3_9ACAR	N/A	N/A	Thiamine pyrophosphokinase OS=Rhipicephalus pulchellus PE=2 SV=1	TRUE	-12.3743	1.6995e-05	23082	141372	22592.6	141916	16680.8	9341.88	-118290	0.163272	-0.787088	6.12475	2.61465
441	770	tr|A0A224YIW4|A0A224YIW4_9ACAR	N/A	N/A	NIPSNAP1 protein OS=Rhipicephalus zambeziensis PE=4 SV=1	TRUE	12.2738	1.7819e-05	86533.3	54994.8	85424.7	54913.1	2903.67	4240.23	31538.5	1.57348	0.196861	0.635534	-0.65396
442	748	tr|L7M6D6|L7M6D6_9ACAR	N/A	N/A	Putative tpa exp: ubiquitin-protein ligase OS=Rhipicephalus pulchellus PE=2 SV=1	TRUE	12.258	1.7952e-05	35032	5062.12	35816.4	4638.66	3954.03	2876.84	29969.9	6.92042	0.840132	0.1445	-2.79086
443	261	tr|J9PBN6|J9PBN6_CANLF	N/A	N/A	Uncharacterized protein OS=Canis lupus familiaris GN=LOC611458 PE=4 SV=1	TRUE	12.257	1.7961e-05	206207	47290.1	206019	48273.2	19419	17184.6	158917	4.36047	0.639533	0.229333	-2.12448
444	1002	tr|A0A023FM06|A0A023FM06_9ACAR	N/A	N/A	Putative glycine-rich cell wall structural protein (Fragment) OS=Amblyomma cajennense PE=2 SV=1	TRUE	-12.1788	1.864e-05	7433.29	124484	7737.67	131800	5427.13	18440	-117050	0.059713	-1.22393	16.7468	4.06581
445	65	tr|A0A224YSR0|A0A224YSR0_9ACAR	N/A	N/A	Lipoprotein amino terminal region OS=Rhipicephalus zambeziensis PE=4 SV=1	TRUE	12.1604	1.8804e-05	3.01922e+06	1.23456e+06	3.01618e+06	1.23093e+06	270567	113785	1.78466e+06	2.44558	0.388382	0.408901	-1.29018
446	404	tr|L7M7U4|L7M7U4_9ACAR	N/A	N/A	Proteasome subunit alpha type OS=Rhipicephalus pulchellus PE=2 SV=1	TRUE	-12.1595	1.8812e-05	411317	526111	418644	525809	16774.3	8667.59	-114793	0.781807	-0.1069	1.27909	0.355115
447	626	tr|A0A131YW86|A0A131YW86_RHIAP	N/A	N/A	Fasciclin domain containing protein OS=Rhipicephalus appendiculatus PE=4 SV=1	TRUE	-12.1375	1.901e-05	244608	389097	246138	392615	20712.4	11740.6	-144488	0.628657	-0.201586	1.59069	0.669656
448	252	tr|A0A131YIS0|A0A131YIS0_RHIAP	N/A	N/A	Chitin-binding protein OS=Rhipicephalus appendiculatus PE=4 SV=1	TRUE	-12.0763	1.9576e-05	667449	867286	661165	856928	17470.8	28108.7	-199837	0.769583	-0.113744	1.2994	0.37785
449	654	tr|A0A224YSV1|A0A224YSV1_9ACAR	N/A	N/A	Alpha-L-fucosidase OS=Rhipicephalus zambeziensis PE=4 SV=1	TRUE	12.0725	1.9611e-05	200894	56050.7	203361	55514.8	14756.8	18921.6	144843	3.58415	0.554386	0.279006	-1.84163
450	547	tr|A0A224ZAU9|A0A224ZAU9_9ACAR	N/A	N/A	Troponin I protein OS=Rhipicephalus zambeziensis PE=4 SV=1	TRUE	-11.9788	2.0516e-05	89178.4	131330	89547.6	131005	4952.5	5000.15	-42151.4	0.679042	-0.168104	1.47266	0.558428
451	718	tr|L7M3F2|L7M3F2_9ACAR	N/A	N/A	Putative ribosomal protein l18 OS=Rhipicephalus pulchellus PE=2 SV=1	TRUE	-11.9566	2.0738e-05	370314	735980	394037	742363	55301	26134.7	-365667	0.503157	-0.298297	1.98745	0.99092
452	491	tr|L7MF64|L7MF64_9ACAR	N/A	N/A	Putative wd40 domain protein (Fragment) OS=Rhipicephalus pulchellus PE=2 SV=1	TRUE	-11.922	2.1088e-05	77345.1	207997	83156.7	208732	19332.9	10326.1	-130652	0.371856	-0.429625	2.68921	1.42718
453	510	tr|L7MA85|L7MA85_9ACAR	N/A	N/A	Putative calcium/calmodulin-dependent serine protein kinase/membrane-associated guanylate kinase OS=Rhipicephalus pulchellus PE=2 SV=1	TRUE	-11.8553	2.1784e-05	29868.3	84968.2	30591.2	85663.9	8146.41	4476.67	-55099.9	0.351523	-0.454046	2.84477	1.50831
454	918	tr|A0A1E1X7S7|A0A1E1X7S7_9ACAR	N/A	N/A	Putative aldehyde dehydrogenase OS=Amblyomma aureolatum PE=2 SV=1	TRUE	-11.7822	2.2578e-05	36092	68955.9	37263.9	68271	4538.82	3243.37	-32863.9	0.523407	-0.28116	1.91056	0.933995
455	117	tr|L7M4A5|L7M4A5_9ACAR	N/A	N/A	Peptidyl-prolyl cis-trans isomerase OS=Rhipicephalus pulchellus PE=2 SV=1	TRUE	-11.7045	2.3458e-05	2.83015e+06	5.12241e+06	2.79756e+06	5.17508e+06	334430	203905	-2.29226e+06	0.552503	-0.257665	1.80994	0.855945
456	860	tr|A0A1E1X172|A0A1E1X172_9ACAR	N/A	N/A	Putative dosage compensation complex subunit mle OS=Amblyomma aureolatum PE=2 SV=1	TRUE	11.695	2.3569e-05	931061	405197	934449	404071	89405.1	9700.45	525864	2.2978	0.361312	0.435199	-1.20025
457	744	tr|L7MBQ7|L7MBQ7_9ACAR	N/A	N/A	Putative plexins functional semaphorin receptor (Fragment) OS=Rhipicephalus pulchellus PE=2 SV=1	TRUE	11.6148	2.4524e-05	143524	60194.7	141389	59410.3	13496.1	4872.96	83329.5	2.38433	0.377367	0.419405	-1.25359
458	750	tr|A0A224YX90|A0A224YX90_9ACAR	N/A	N/A	Oxidoreductase OS=Rhipicephalus zambeziensis PE=4 SV=1	TRUE	-11.6024	2.4676e-05	86289	147511	87361.1	146161	7174.73	7739.14	-61221.7	0.584968	-0.232868	1.7095	0.773571
459	106	tr|A0A131ZAM9|A0A131ZAM9_RHIAP	N/A	N/A	Twitchin like (Fragment) OS=Rhipicephalus appendiculatus PE=4 SV=1	TRUE	-11.5908	2.4819e-05	278875	697853	281994	675140	45800.1	55936.9	-418978	0.399618	-0.398355	2.50239	1.32331
460	101	tr|A0A224YRR9|A0A224YRR9_9ACAR	N/A	N/A	Insulin-like growth factor 2 mRNA-binding protein 1 OS=Rhipicephalus zambeziensis PE=4 SV=1	TRUE	-11.5765	2.4996e-05	767290	1.15277e+06	746237	1.15034e+06	66354	5673.67	-385476	0.665608	-0.176782	1.50239	0.587256
461	861	tr|A0A023G7Y5|A0A023G7Y5_9ACAR	N/A	N/A	Putative conserved membrane protein OS=Amblyomma triste PE=2 SV=1	TRUE	-11.5701	2.5077e-05	520303	1.36189e+06	525952	1.38749e+06	18537	144291	-841587	0.382045	-0.417886	2.61749	1.38819
462	915	tr|L7MK38|L7MK38_9ACAR	N/A	N/A	Putative similar to chymotrypsin-elastase inhibitor ixodidin (Fragment) OS=Rhipicephalus pulchellus PE=2 SV=1	TRUE	11.5446	2.5398e-05	38063.1	6806.26	38326.9	7241.23	3279.52	4308.89	31256.8	5.59236	0.747595	0.178815	-2.48346
463	976	tr|A0A224Z7V2|A0A224Z7V2_9ACAR	N/A	N/A	Serum amyloid A protein OS=Rhipicephalus zambeziensis PE=4 SV=1	TRUE	-11.5446	2.5398e-05	59022.3	124647	55215	123938	10652	3973.25	-65624.5	0.473516	-0.324665	2.11186	1.07851
464	1036	tr|A0A1E1X9K3|A0A1E1X9K3_9ACAR	N/A	N/A	Putative mitochondrial/plastidial beta-ketoacyl-acp reductase OS=Amblyomma aureolatum PE=2 SV=1	TRUE	11.517	2.5751e-05	92877.7	26646.8	93622.6	30042.6	2884.09	11133.9	66230.9	3.48551	0.542267	0.286902	-1.80137
465	204	tr|A0A131XG98|A0A131XG98_9ACAR	N/A	N/A	Putative zinc-binding oxidoreductase OS=Hyalomma excavatum PE=2 SV=1	TRUE	-11.4883	2.6124e-05	739610	1.03581e+06	745030	1.03543e+06	49123	15682.2	-296201	0.71404	-0.146278	1.40048	0.485924
466	365	tr|E2R081|E2R081_CANLF	N/A	N/A	Serpin family B member 10 OS=Canis lupus familiaris GN=SERPINB10 PE=3 SV=1	TRUE	11.3889	2.7468e-05	289113	86671.3	290185	91932.4	23072.2	27046.8	202441	3.33574	0.523192	0.299784	-1.73801
467	233	tr|L7LWU5|L7LWU5_9ACAR	N/A	N/A	Putative microtubule associated complex OS=Rhipicephalus pulchellus PE=2 SV=1	TRUE	-11.3883	2.7476e-05	812888	1.01687e+06	815092	1.02105e+06	32888.3	14200.2	-203982	0.799402	-0.0972345	1.25093	0.323006
468	300	tr|C9W1Q4|C9W1Q4_RHISA	N/A	N/A	Putative thyropin OS=Rhipicephalus sanguineus PE=2 SV=1	TRUE	-11.3818	2.7567e-05	1.86391e+06	2.25825e+06	1.85696e+06	2.26684e+06	49816.2	48165.1	-394341	0.825378	-0.0833473	1.21157	0.276874
469	1050	tr|L7M4E9|L7M4E9_9ACAR	N/A	N/A	Inositol-1-monophosphatase OS=Rhipicephalus pulchellus PE=2 SV=1	TRUE	11.3529	2.7975e-05	69668.1	24139	71130.5	23704.4	7079.04	3770.82	45529.1	2.88612	0.460314	0.346486	-1.52913
470	88	tr|L7MGI2|L7MGI2_9ACAR	N/A	N/A	Putative gmp synthase (Fragment) OS=Rhipicephalus pulchellus PE=2 SV=1	TRUE	11.3399	2.816e-05	503377	327608	509621	330732	29787	8586.87	175768	1.53652	0.186538	0.650822	-0.619666
471	971	tr|B7S729|B7S729_RHISA	N/A	N/A	FREP A1 (Fragment) OS=Rhipicephalus sanguineus PE=2 SV=1	TRUE	11.2985	2.8761e-05	58806.1	14779.9	58735	12310.8	2604.52	7345.21	44026.2	3.97878	0.59975	0.251333	-1.99233
472	299	tr|L7MDL8|L7MDL8_9ACAR	N/A	N/A	Uncharacterized protein (Fragment) OS=Rhipicephalus pulchellus PE=2 SV=1	TRUE	11.2953	2.8807e-05	533977	449553	537543	448619	9467.74	11568.1	84424.2	1.1878	0.0747419	0.841895	-0.248287
473	410	tr|L7M549|L7M549_9ACAR	N/A	N/A	Putative fibrillarin OS=Rhipicephalus pulchellus PE=2 SV=1	TRUE	-11.2816	2.9009e-05	229568	655629	210657	663692	71284.8	24971.1	-426062	0.350148	-0.455748	2.85593	1.51396
474	318	tr|A0A131XN28|A0A131XN28_9ACAR	N/A	N/A	Putative nadh-ubiquinone oxidoreductase ndufs3/30 kDa subunit OS=Hyalomma excavatum PE=2 SV=1	TRUE	-11.2812	2.9015e-05	349459	606478	364322	605921	45530.8	1787.73	-257019	0.57621	-0.239419	1.73548	0.795333
475	9	tr|L7M2A4|L7M2A4_9ACAR	N/A	N/A	Putative alpha actinin OS=Rhipicephalus pulchellus PE=2 SV=1	TRUE	-11.2806	2.9024e-05	2.55195e+06	3.31338e+06	2.55472e+06	3.35608e+06	86499.3	103646	-761429	0.770195	-0.113399	1.29837	0.376704
476	937	tr|A0A224YAN3|A0A224YAN3_9ACAR	N/A	N/A	Uncharacterized protein OS=Rhipicephalus zambeziensis PE=4 SV=1	TRUE	-11.2513	2.9461e-05	27584.6	95961.6	31616.6	96014.5	12021	1795.85	-68377	0.287455	-0.541431	3.47881	1.79859
477	793	tr|A0A224YVU3|A0A224YVU3_9ACAR	N/A	N/A	Clavaminate synthase OS=Rhipicephalus zambeziensis PE=4 SV=1	TRUE	-11.2234	2.9887e-05	49090.7	132458	45046.5	132656	14451	3445.24	-83367.4	0.370613	-0.43108	2.69823	1.43202
478	434	tr|L7MDE2|L7MDE2_9ACAR	N/A	N/A	Uncharacterized protein (Fragment) OS=Rhipicephalus pulchellus PE=2 SV=1	TRUE	-11.1766	3.0614e-05	144266	199371	141812	201117	5354.14	8280.65	-55105.4	0.723604	-0.140499	1.38197	0.466728
479	228	tr|L7M9V8|L7M9V8_9ACAR	N/A	N/A	Putative proline and glutamine-rich splicing factor sfpq OS=Rhipicephalus pulchellus PE=2 SV=1	TRUE	-11.173	3.0672e-05	466282	666207	471623	660994	31838.2	16341.7	-199925	0.699905	-0.154961	1.42876	0.514769
480	947	tr|L7MG92|L7MG92_9ACAR	N/A	N/A	Putative tick serine protease (Fragment) OS=Rhipicephalus pulchellus PE=2 SV=1	TRUE	11.1349	3.1281e-05	133697	88021.6	133947	87660.1	7413.21	3514.05	45674.9	1.51891	0.181531	0.658369	-0.603032
481	811	tr|L7M5H2|L7M5H2_9ACAR	N/A	N/A	Uncharacterized protein OS=Rhipicephalus pulchellus PE=2 SV=1	TRUE	-11.0632	3.2465e-05	24074.6	37588.3	24072.6	37557	1268.55	2087.82	-13513.7	0.640482	-0.193493	1.56132	0.64277
482	167	tr|L7M5R1|L7M5R1_9ACAR	N/A	N/A	Proteasome subunit alpha type OS=Rhipicephalus pulchellus PE=2 SV=1	TRUE	11.0587	3.2542e-05	418656	303652	420045	302824	19440.5	7392.87	115003	1.37873	0.13948	0.725304	-0.463342
483	513	tr|L7M2D4|L7M2D4_9ACAR	N/A	N/A	NAD-dependent protein deacylase OS=Rhipicephalus pulchellus PE=2 SV=1	TRUE	-10.9804	3.3899e-05	70073.6	110278	70494.9	110687	4931.56	5413.29	-40204	0.635429	-0.196933	1.57374	0.654197
484	945	tr|L7MJ59|L7MJ59_9ACAR	N/A	N/A	Putative glycosylphosphatidylinositol anchor synthesis protein (Fragment) OS=Rhipicephalus pulchellus PE=2 SV=1	TRUE	-10.9107	3.5164e-05	153520	205979	154227	205735	6592.96	7000.08	-52458.7	0.74532	-0.127657	1.34171	0.424068
485	91	tr|A0A224Z4V4|A0A224Z4V4_9ACAR	N/A	N/A	Calponin OS=Rhipicephalus zambeziensis PE=3 SV=1	TRUE	10.8653	3.6016e-05	8.46128e+06	6.71059e+06	8.50229e+06	6.70802e+06	304967	104131	1.7507e+06	1.26089	0.100676	0.793093	-0.334438
486	573	tr|A0A131X8J9|A0A131X8J9_9ACAR	N/A	N/A	Putative glutathione s-transferase OS=Hyalomma excavatum PE=2 SV=1	TRUE	10.7941	3.7402e-05	924066	441938	934765	469219	50859.3	73440.3	482128	2.09094	0.320342	0.478254	-1.06415
487	255	tr|A0A224Z1V2|A0A224Z1V2_9ACAR	N/A	N/A	Uncharacterized protein OS=Rhipicephalus zambeziensis PE=4 SV=1	TRUE	10.6763	3.9834e-05	340370	249682	343098	250505	10240.1	13555.7	90688.5	1.36322	0.134565	0.733559	-0.447015
488	851	tr|F1P8L7|F1P8L7_CANLF	N/A	N/A	Rab GDP dissociation inhibitor OS=Canis lupus familiaris GN=GDI2 PE=3 SV=1	TRUE	10.6673	4.0027e-05	13671.1	999.789	14553.2	1109.48	2305.45	573.553	12671.3	13.674	1.13589	0.0731317	-3.77336
489	333	tr|A0A224YWT9|A0A224YWT9_9ACAR	N/A	N/A	Gamma-glutamyltranspeptidase / glutathione hydrolase / leukotriene-C4 hydrolase OS=Rhipicephalus zambeziensis PE=4 SV=1	TRUE	-10.6649	4.0079e-05	382245	579707	380484	578352	19331	31584	-197462	0.659377	-0.180866	1.51658	0.600825
490	765	tr|A0A224Z279|A0A224Z279_9ACAR	N/A	N/A	Sulfide:quinone oxidoreductase OS=Rhipicephalus zambeziensis PE=4 SV=1	TRUE	-10.6189	4.1084e-05	60648	171232	51283	172502	20231.3	4948.28	-110584	0.354187	-0.450768	2.82337	1.49742
491	169	tr|A0A224Z298|A0A224Z298_9ACAR	N/A	N/A	Isocitrate dehydrogenase [NAD] subunit, mitochondrial OS=Rhipicephalus zambeziensis PE=3 SV=1	TRUE	-10.565	4.2301e-05	350882	583130	366188	586891	40190.7	17823.3	-232248	0.601721	-0.220605	1.6619	0.732833
492	478	tr|F0J9C4|F0J9C4_AMBVA	N/A	N/A	Hypothetical conserved protein 750 (Fragment) OS=Amblyomma variegatum PE=2 SV=1	TRUE	10.5303	4.3108e-05	234120	126691	235188	122210	8034.52	18755.4	107429	1.84796	0.266693	0.541136	-0.885936
493	186	tr|A0A224YYU9|A0A224YYU9_9ACAR	N/A	N/A	Fructose-1,6-bisphosphatase I OS=Rhipicephalus zambeziensis PE=3 SV=1	TRUE	10.4978	4.3876e-05	170759	99179.8	171135	99940.4	5876.07	12306.1	71579.6	1.72172	0.235961	0.580816	-0.783847
494	644	tr|A0A224YQ32|A0A224YQ32_9ACAR	N/A	N/A	Gamma-butyrobetaine dioxygenase OS=Rhipicephalus zambeziensis PE=4 SV=1	TRUE	-10.4868	4.4142e-05	31333.6	93126.5	29058.8	93935.2	9294.47	7245.51	-61792.9	0.336463	-0.473063	2.9721	1.57148
495	529	tr|A0A224Z8H8|A0A224Z8H8_9ACAR	N/A	N/A	Selenium binding protein OS=Rhipicephalus zambeziensis PE=4 SV=1	TRUE	-10.4247	4.5669e-05	148647	204366	148600	204752	8053.99	7029.02	-55719.4	0.727355	-0.138254	1.37484	0.459268
496	571	tr|A0A023GCN0|A0A023GCN0_9ACAR	N/A	N/A	Protein lsm14 log a OS=Amblyomma triste PE=2 SV=1	TRUE	-10.3915	4.6509e-05	56183.3	290220	57313.5	307479	8478.56	44238.6	-234037	0.193589	-0.71312	5.16559	2.36893
497	143	tr|A0A224YKT1|A0A224YKT1_9ACAR	N/A	N/A	Cytosol aminopeptidase OS=Rhipicephalus zambeziensis PE=3 SV=1	TRUE	10.3862	4.6647e-05	915296	802407	911470	801144	17677.9	12651	112889	1.14069	0.0571669	0.876664	-0.189904
498	875	tr|A0A023G079|A0A023G079_9ACAR	N/A	N/A	Putative aicar transformylase/imp cyclohydrolase/methylglyoxal synthase (Fragment) OS=Amblyomma parvum PE=2 SV=1	TRUE	10.3375	4.7917e-05	155054	94079.5	155954	95019.9	10520.2	5337.52	60974.7	1.64812	0.216988	0.606752	-0.72082
499	431	tr|C9W1S8|C9W1S8_RHISA	N/A	N/A	Thioredoxin peroxidase (Fragment) OS=Rhipicephalus sanguineus PE=2 SV=1	TRUE	-10.3278	4.8176e-05	712409	926067	710920	927634	32570.7	25516.3	-213658	0.769285	-0.113913	1.29991	0.378411
500	301	tr|A0A131XM47|A0A131XM47_9ACAR	N/A	N/A	NADH dehydrogenase [ubiquinone] flavoprotein 1, mitochondrial OS=Hyalomma excavatum PE=2 SV=1	TRUE	-10.3165	4.8478e-05	195638	299653	197007	303170	15254.9	13187.4	-104015	0.652882	-0.185165	1.53167	0.615106
501	608	tr|Q6WNW9|Q6WNW9_RHISA	N/A	N/A	Ferritin OS=Rhipicephalus sanguineus GN=Fer PE=2 SV=1	TRUE	10.2733	4.9654e-05	376969	301163	373588	301045	12018.8	8564.02	75806.3	1.25171	0.0975044	0.798906	-0.323903
502	914	tr|A0A224YIL5|A0A224YIL5_9ACAR	N/A	N/A	Uncharacterized protein OS=Rhipicephalus zambeziensis PE=4 SV=1	TRUE	10.2615	4.9983e-05	143559	35211.1	142659	35137.1	20904.9	2987.9	108348	4.07709	0.61035	0.245273	-2.02754
503	825	tr|A0A224YRF8|A0A224YRF8_9ACAR	N/A	N/A	TIL domain containing protein OS=Rhipicephalus zambeziensis PE=4 SV=1	TRUE	10.2588	5.0057e-05	92567.9	64084.7	92408.8	65217.9	4021.44	3829.22	28483.2	1.44446	0.159706	0.692299	-0.530532
504	267	tr|L7M4L8|L7M4L8_9ACAR	N/A	N/A	Putative 60s ribosomal protein l7 OS=Rhipicephalus pulchellus PE=2 SV=1	TRUE	-10.2089	5.1473e-05	326517	695103	333503	696597	16004.4	70412.9	-368586	0.469739	-0.328143	2.12884	1.09007
505	979	tr|A0A224YM56|A0A224YM56_9ACAR	N/A	N/A	Legumain OS=Rhipicephalus zambeziensis PE=4 SV=1	TRUE	10.1882	5.2072e-05	14019.1	2031.65	14073.1	2053.81	2213.75	798.041	11987.5	6.90038	0.838873	0.14492	-2.78667
506	442	tr|L7M2H2|L7M2H2_9ACAR	N/A	N/A	Coronin OS=Rhipicephalus pulchellus PE=2 SV=1	TRUE	-10.177	5.2401e-05	289857	393397	282818	393942	18494.8	8484.07	-103540	0.736805	-0.132647	1.35721	0.440644
507	936	tr|B7PRW2|B7PRW2_IXOSC	N/A	N/A	Insect cuticle domaincontaining protein OS=Ixodes scapularis GN=8030449 PE=4 SV=1	TRUE	10.1187	5.4149e-05	443063	348730	444540	349237	18547.7	1904.3	94332.6	1.2705	0.103976	0.78709	-0.3454
508	229	tr|A0A224Y399|A0A224Y399_9ACAR	N/A	N/A	Dipeptidyl peptidase 3 OS=Rhipicephalus zambeziensis PE=3 SV=1	TRUE	10.0767	5.5449e-05	365883	258596	361219	256225	17713.4	11818.3	107287	1.41488	0.150721	0.706771	-0.500684
509	131	tr|A0A131Z8J7|A0A131Z8J7_RHIAP	N/A	N/A	2,3-bisphosphoglycerate-independent phosphoglycerate mutase OS=Rhipicephalus appendiculatus PE=3 SV=1	TRUE	10.0742	5.5528e-05	70403.6	28139.2	68789.8	27661.1	6364.84	5467.32	42264.4	2.50198	0.398284	0.399684	-1.32307
510	202	tr|L7M7B2|L7M7B2_9ACAR	N/A	N/A	Putative metalloexopeptidase OS=Rhipicephalus pulchellus PE=2 SV=1	TRUE	9.98424	5.8443e-05	1.22028e+06	908637	1.21448e+06	903372	51844.4	34775.8	311646	1.34298	0.12807	0.744612	-0.42544
511	688	tr|A0A023FKF7|A0A023FKF7_9ACAR	N/A	N/A	Aconitate hydratase, mitochondrial OS=Amblyomma cajennense PE=2 SV=1	TRUE	-9.9797	5.8595e-05	175490	369899	172550	365139	26953.8	28132.5	-194409	0.474427	-0.32383	2.1078	1.07574
512	1045	tr|B7P6R8|B7P6R8_IXOSC	N/A	N/A	Secreted inorganic pyrophosphatase, putative (Fragment) OS=Ixodes scapularis GN=8025457 PE=4 SV=1	TRUE	9.88407	6.19e-05	122852	96613.8	123057	96211	2296.35	4786.97	26238.6	1.27158	0.104344	0.786422	-0.346624
513	841	tr|Q26229|Q26229_RHIAP	N/A	N/A	Autoantigen OS=Rhipicephalus appendiculatus PE=2 SV=1	TRUE	9.87552	6.2205e-05	133295	71820.3	132889	71390.3	12349.1	1581.05	61474.7	1.85595	0.268567	0.538807	-0.892159
514	901	tr|A0A131XDZ9|A0A131XDZ9_9ACAR	N/A	N/A	Putative isovaleryl-coa dehydrogenase OS=Hyalomma excavatum PE=2 SV=1	TRUE	-9.81734	6.4334e-05	62491.6	77738.7	63100.1	77946.7	2559.36	1760.09	-15247.1	0.803867	-0.0948157	1.24399	0.314971
515	363	tr|B7SP19|B7SP19_DERVA	N/A	N/A	Quinoid dihydropteridine reductase OS=Dermacentor variabilis PE=2 SV=1	TRUE	9.81578	6.4392e-05	373674	276520	375443	281066	16555.1	10853	97153.7	1.35134	0.130766	0.740004	-0.434395
516	487	tr|L7M2B5|L7M2B5_9ACAR	N/A	N/A	Proteasome subunit alpha type OS=Rhipicephalus pulchellus PE=2 SV=1	TRUE	9.80308	6.4868e-05	539196	449707	536822	448626	9068.01	15846.2	89489.2	1.19899	0.0788172	0.834032	-0.261825
517	178	tr|A0A131XBZ5|A0A131XBZ5_9ACAR	N/A	N/A	Serine hydroxymethyltransferase (Fragment) OS=Hyalomma excavatum PE=2 SV=1	TRUE	9.77975	6.5754e-05	237036	152774	233275	152360	15876.8	6698.67	84262.6	1.55155	0.190766	0.644516	-0.633712
518	1012	tr|A0A131XJY6|A0A131XJY6_9ACAR	N/A	N/A	Putative prohibitin-like protein OS=Hyalomma excavatum PE=2 SV=1	TRUE	-9.73764	6.7388e-05	16675	110311	10880.6	111403	18701.2	4486.27	-93636.3	0.151163	-0.820554	6.61538	2.72582
519	493	tr|A0A131XAM4|A0A131XAM4_9ACAR	N/A	N/A	Adenylosuccinate lyase OS=Hyalomma excavatum PE=2 SV=1	TRUE	-9.69282	6.9179e-05	31368.7	44543.7	31599.4	44864.9	1708.91	2114.22	-13175	0.704223	-0.15229	1.42001	0.505896
520	620	tr|A0A224Z4P0|A0A224Z4P0_9ACAR	N/A	N/A	Small subunit ribosomal protein S28e OS=Rhipicephalus zambeziensis PE=4 SV=1	TRUE	-9.64533	7.1137e-05	828383	1.10268e+06	828885	1.09466e+06	43780.2	36308.3	-274299	0.751244	-0.124219	1.33113	0.412647
521	153	tr|L7M7D6|L7M7D6_9ACAR	N/A	N/A	Putative biosynthetic process OS=Rhipicephalus pulchellus PE=2 SV=1	TRUE	-9.54598	7.5444e-05	608350	922249	598137	942233	28710.5	59168	-313900	0.659637	-0.180695	1.51599	0.600256
522	782	tr|A0A131XR23|A0A131XR23_9ACAR	N/A	N/A	Putative enolase (Fragment) OS=Hyalomma excavatum PE=2 SV=1	TRUE	-9.49934	7.757e-05	26674.5	83129.6	29060.9	82912	9591.34	7020.38	-56455.1	0.320878	-0.49366	3.11645	1.6399
523	383	tr|A0A131YN66|A0A131YN66_RHIAP	N/A	N/A	Uncharacterized protein OS=Rhipicephalus appendiculatus PE=4 SV=1	TRUE	-9.45548	7.9633e-05	240899	379330	240153	381753	17796.1	23251.9	-138431	0.635065	-0.197182	1.57464	0.655024
524	576	tr|L7MLA8|L7MLA8_9ACAR	N/A	N/A	Putative head-elevated expression protein (Fragment) OS=Rhipicephalus pulchellus PE=2 SV=1	TRUE	-9.41135	8.1773e-05	90845.5	147597	91743.9	148145	7734.77	9253.33	-56751.8	0.615495	-0.210775	1.62471	0.70018
525	406	tr|A0A224Z685|A0A224Z685_9ACAR	N/A	N/A	Polyadenylate-binding protein OS=Rhipicephalus zambeziensis PE=3 SV=1	TRUE	-9.40663	8.2006e-05	268812	354318	267893	351108	16721.3	7135.48	-85506.7	0.758673	-0.119946	1.31809	0.398451
526	967	tr|G3MH64|G3MH64_9ACAR	N/A	N/A	Uncharacterized protein (Fragment) OS=Amblyomma maculatum PE=2 SV=1	TRUE	9.40146	8.2261e-05	96681.7	65321.2	97022.1	66299.6	3628.39	5598.44	31360.5	1.4801	0.17029	0.675631	-0.565692
527	619	tr|A0A224Z9U1|A0A224Z9U1_9ACAR	N/A	N/A	Thymus specific serine protease OS=Rhipicephalus zambeziensis PE=4 SV=1	TRUE	-9.34046	8.5351e-05	130845	149338	129296	149584	3802.8	1103.68	-18492.8	0.876168	-0.0574127	1.14133	0.190721
528	649	tr|L7M8D8|L7M8D8_9ACAR	N/A	N/A	Succinate dehydrogenase [ubiquinone] iron-sulfur subunit, mitochondrial OS=Rhipicephalus pulchellus PE=2 SV=1	TRUE	-9.31982	8.6426e-05	117792	178882	118358	176983	9389.37	9148.89	-61089.7	0.658491	-0.18145	1.51862	0.602764
529	755	tr|L7M0J0|L7M0J0_9ACAR	N/A	N/A	Uncharacterized protein OS=Rhipicephalus pulchellus PE=2 SV=1	TRUE	-9.31149	8.6865e-05	67173.1	104871	66032	104822	3723.6	7189.98	-37697.5	0.640533	-0.193458	1.5612	0.642655
530	474	tr|L7M4S4|L7M4S4_9ACAR	N/A	N/A	Putative secreted protein OS=Rhipicephalus pulchellus PE=2 SV=1	TRUE	9.24961	9.0204e-05	1.57408e+06	1.24708e+06	1.5963e+06	1.23816e+06	66037.5	25264.4	326998	1.26221	0.101132	0.79226	-0.335953
531	646	tr|L7M096|L7M096_9ACAR	N/A	N/A	Putative toll-like receptor 5 OS=Rhipicephalus pulchellus PE=2 SV=1	TRUE	9.23705	9.09e-05	271443	95867.9	272259	95181.9	37213.8	7765.49	175575	2.83143	0.452005	0.353179	-1.50153
532	813	tr|A0A131YYH5|A0A131YYH5_RHIAP	N/A	N/A	Calsequestrin OS=Rhipicephalus appendiculatus PE=3 SV=1	TRUE	9.23362	9.1091e-05	116404	80054.3	117172	80717.3	5351.15	5775.34	36349.7	1.45406	0.162583	0.687728	-0.54009
533	986	tr|A0A224YCP5|A0A224YCP5_9ACAR	N/A	N/A	Glycine rich superfamily member OS=Rhipicephalus zambeziensis PE=4 SV=1	TRUE	9.23352	9.1097e-05	39318.8	11132.1	39258.3	12436	3653	4891.86	28186.7	3.53202	0.548023	0.283124	-1.82049
534	745	tr|L7M6V2|L7M6V2_9ACAR	N/A	N/A	Putative adenosine deaminase OS=Rhipicephalus pulchellus PE=2 SV=1	TRUE	-9.23076	9.1251e-05	22261.9	38156.7	22566	37201.2	2091.18	2736.3	-15894.9	0.583432	-0.23401	1.71399	0.777363
535	373	tr|L7MKC0|L7MKC0_9ACAR	N/A	N/A	Putative alternative splicing factor srp20/9g8 rrm superfamily (Fragment) OS=Rhipicephalus pulchellus PE=2 SV=1	TRUE	-9.211	9.2363e-05	1.15943e+06	1.43387e+06	1.15646e+06	1.44011e+06	39667.7	44468	-274440	0.808602	-0.0922654	1.2367	0.306499
536	205	tr|V5HH33|V5HH33_IXORI	N/A	N/A	Putative 26s proteasome regulatory complex atpase rpt5 OS=Ixodes ricinus PE=2 SV=1	TRUE	-9.18791	9.3682e-05	340378	456399	337040	454830	19997.3	15424.7	-116020	0.745792	-0.127382	1.34086	0.423155
537	162	tr|A0A224Z3B4|A0A224Z3B4_9ACAR	N/A	N/A	Malic enzyme OS=Rhipicephalus zambeziensis PE=3 SV=1	TRUE	-9.17941	9.4174e-05	283507	425074	290252	430852	22170.7	21443.9	-141567	0.666959	-0.175901	1.49934	0.584329
538	337	tr|L7M1F0|L7M1F0_9ACAR	N/A	N/A	Putative camp-dependent protein kinase r2 OS=Rhipicephalus pulchellus PE=2 SV=1	TRUE	-9.15509	9.5596e-05	327999	389162	329979	392745	10070.4	8781.51	-61162.7	0.842835	-0.0742575	1.18647	0.246678
539	80	tr|F1PTY1|F1PTY1_CANLF	N/A	N/A	Keratin, type II cytoskeletal 1 OS=Canis lupus familiaris GN=KRT1 PE=3 SV=1	TRUE	-9.05336	0.0001	2.67363e+06	4.71873e+06	2.68544e+06	4.86121e+06	65453.4	447021	-2.0451e+06	0.5666	-0.246723	1.76491	0.819597
540	538	tr|V5IJP4|V5IJP4_IXORI	N/A	N/A	Putative nuclease sensitive element-binding protein OS=Ixodes ricinus PE=2 SV=1	TRUE	-9.07911	0.0001	32801.8	57775.9	33162.1	58203.6	1464.06	5303.06	-24974.1	0.567742	-0.245849	1.76136	0.816693
541	49	tr|A0A131YYR4|A0A131YYR4_RHIAP	N/A	N/A	Heat shock 70kDa protein 1/8 OS=Rhipicephalus appendiculatus PE=3 SV=1	TRUE	8.98314	0.00011	956626	714419	950130	714505	43428.1	31966.7	242207	1.33903	0.126789	0.746812	-0.421184
542	108	tr|A0A224Z3G3|A0A224Z3G3_9ACAR	N/A	N/A	V-type H+-transporting ATPase subunit A OS=Rhipicephalus zambeziensis PE=3 SV=1	TRUE	-8.87313	0.00011	230024	406942	239493	407066	35585.2	17996.9	-176918	0.56525	-0.24776	1.76913	0.823039
543	391	tr|V5HR13|V5HR13_IXORI	N/A	N/A	Putative sarcomere (Fragment) OS=Ixodes ricinus PE=2 SV=1	TRUE	-8.89136	0.00011	535909	658880	536062	657412	17196.3	21665.9	-122971	0.813363	-0.0897156	1.22946	0.298029
544	475	tr|C9W1P7|C9W1P7_RHISA	N/A	N/A	ATP synthase H+ transporting mitochondrial F1 complex delta subunit OS=Rhipicephalus sanguineus PE=2 SV=1	TRUE	-8.88887	0.00011	129181	264962	127708	264816	19286.7	23693.3	-135781	0.487545	-0.311985	2.05109	1.03639
545	647	tr|V5HGA0|V5HGA0_IXORI	N/A	N/A	40S ribosomal protein S24 OS=Ixodes ricinus PE=2 SV=1	TRUE	-8.94902	0.00011	83229.1	119117	82457.2	117347	4034.85	6931.6	-35887.5	0.69872	-0.155697	1.43119	0.517214
546	978	tr|A0A224Z2Z3|A0A224Z2Z3_9ACAR	N/A	N/A	Ubiquitin carboxyl-terminal hydrolase OS=Rhipicephalus zambeziensis PE=3 SV=1	TRUE	8.86503	0.00011	64764.4	49346.7	64796	48857.7	2202.04	2692.52	15417.7	1.31244	0.118078	0.761942	-0.392246
547	33	tr|F1PYU9|F1PYU9_CANLF	N/A	N/A	Keratin, type I cytoskeletal 10 OS=Canis lupus familiaris GN=KRT10 PE=3 SV=2	TRUE	-8.81187	0.00012	3.32513e+06	7.62941e+06	3.7767e+06	7.68572e+06	934104	286078	-4.30428e+06	0.43583	-0.360683	2.29447	1.19816
548	99	tr|L7M721|L7M721_9ACAR	N/A	N/A	Putative lipoprotein amino terminal region OS=Rhipicephalus pulchellus PE=2 SV=1	TRUE	-8.79924	0.00012	1.85312e+06	2.82995e+06	1.88766e+06	2.87644e+06	100260	198099	-976827	0.654826	-0.183874	1.52712	0.610818
549	369	tr|G3MNQ4|G3MNQ4_9ACAR	N/A	N/A	Uncharacterized protein OS=Amblyomma maculatum PE=2 SV=1	TRUE	-8.80073	0.00012	81535.2	139552	78486	141248	10400	8103.77	-58016.7	0.584264	-0.233391	1.71155	0.775307
550	457	tr|A0A1E1XH73|A0A1E1XH73_9ACAR	N/A	N/A	Putative cysteine s-methyltransferase (Fragment) OS=Amblyomma aureolatum PE=2 SV=1	TRUE	-8.74353	0.00012	456106	606883	455589	614529	25137.7	23613.2	-150777	0.751554	-0.12404	1.33058	0.412051
551	463	tr|A0A023FLT6|A0A023FLT6_9ACAR	N/A	N/A	Putative vitellogenin-2 OS=Amblyomma cajennense PE=2 SV=1	TRUE	-8.80098	0.00012	122751	293534	136780	291643	38004.3	7867.11	-170783	0.418183	-0.378634	2.3913	1.2578
552	985	tr|A0A224YDZ8|A0A224YDZ8_9ACAR	N/A	N/A	Replication factor A3 OS=Rhipicephalus zambeziensis PE=4 SV=1	TRUE	8.84289	0.00012	14320.8	4098.42	13730.3	3970.51	2201.62	705.864	10222.4	3.49424	0.543352	0.286186	-1.80498
553	451	tr|A0A131YK44|A0A131YK44_RHIAP	N/A	N/A	Urocanate hydratase OS=Rhipicephalus appendiculatus PE=3 SV=1	TRUE	8.65083	0.00013	142852	61240.3	150597	60132.2	17960.1	5782.26	81611.8	2.33265	0.367849	0.428697	-1.22197
554	512	tr|A0A023FV38|A0A023FV38_9ACAR	N/A	N/A	Putative 15-hydroxyprostaglandin dehydrogenase OS=Amblyomma parvum PE=2 SV=1	TRUE	8.63123	0.00013	386446	323782	384329	328632	6165.19	13146.3	62663.2	1.19353	0.0768351	0.837847	-0.255241
555	668	tr|A0A224YLY0|A0A224YLY0_9ACAR	N/A	N/A	Midgut cysteine proteinase 2 OS=Rhipicephalus zambeziensis PE=3 SV=1	TRUE	8.70047	0.00013	726879	509279	714642	512033	30017.3	40012.2	217599	1.42727	0.154506	0.700639	-0.513257
556	111	tr|A0A224YQ83|A0A224YQ83_9ACAR	N/A	N/A	40s ribosomal protein s3 OS=Rhipicephalus zambeziensis PE=4 SV=1	TRUE	-8.52888	0.00014	1.20887e+06	1.70822e+06	1.21625e+06	1.68683e+06	71070.6	93061.9	-499350	0.707677	-0.150165	1.41307	0.498836
557	569	tr|L7M639|L7M639_9ACAR	N/A	N/A	Putative der and-71 ribosomal protein l35 OS=Rhipicephalus pulchellus PE=2 SV=1	TRUE	-8.60073	0.00014	127497	258568	122624	247750	20210.2	22815.2	-131072	0.493086	-0.307077	2.02804	1.02009
558	638	tr|F1PZC6|F1PZC6_CANLF	N/A	N/A	Histidine rich glycoprotein OS=Canis lupus familiaris GN=HRG PE=4 SV=2	TRUE	8.53126	0.00014	151502	38770.6	145742	39729.6	21834.4	14889.3	112732	3.90766	0.591917	0.255907	-1.96631
559	710	tr|L7M8S3|L7M8S3_9ACAR	N/A	N/A	Putative 26s proteasome regulatory complex subunit rpn8/psmd7 OS=Rhipicephalus pulchellus PE=2 SV=1	TRUE	8.52519	0.00014	128822	100514	128865	101540	1426.23	6486.19	28308.5	1.28164	0.107765	0.780251	-0.357989
560	983	tr|A0A224YHD1|A0A224YHD1_9ACAR	N/A	N/A	Amblyomma 40 33 family member OS=Rhipicephalus zambeziensis PE=4 SV=1	TRUE	8.50955	0.00014	36517.1	15356.6	37633.9	15724.3	4671.29	1706.84	21160.5	2.37794	0.376201	0.420532	-1.24971
561	1074	tr|L7M7I7|L7M7I7_9ACAR	N/A	N/A	Putative alkyl hydroperoxide reductase thiol specific antioxidant OS=Rhipicephalus pulchellus PE=2 SV=1	TRUE	8.60232	0.00014	377624	317345	382320	318560	10970.5	8721.22	60279.4	1.18995	0.0755285	0.840372	-0.2509
562	120	tr|A0A224ZBZ1|A0A224ZBZ1_9ACAR	N/A	N/A	Voltage-dependent anion channel protein 2 OS=Rhipicephalus zambeziensis PE=4 SV=1	TRUE	8.43299	0.00015	63167.5	46242.3	63204.3	46994.5	815.076	3930.42	16925.2	1.36601	0.135454	0.732058	-0.449969
563	223	tr|L7N0F2|L7N0F2_CANLF	N/A	N/A	Uncharacterized protein OS=Canis lupus familiaris PE=4 SV=1	TRUE	8.43084	0.00015	360264	53388.6	325514	52473.3	72009.2	10689.7	306875	6.74795	0.829172	0.148193	-2.75445
564	691	tr|A0A131YS81|A0A131YS81_RHIAP	N/A	N/A	Aldehyde dehydrogenase (NAD+) OS=Rhipicephalus appendiculatus PE=3 SV=1	TRUE	8.49732	0.00015	406164	213208	409482	208041	27995.5	35761.1	192957	1.90502	0.279899	0.524929	-0.929805
565	794	tr|F2Z4Q7|F2Z4Q7_CANLF	N/A	N/A	Serpin family F member 1 OS=Canis lupus familiaris GN=SERPINF1 PE=3 SV=1	TRUE	8.44141	0.00015	55952.2	10016.5	57267	7389.89	5530.44	9373.55	45935.7	5.58601	0.747102	0.179019	-2.48182
566	969	tr|C9W1B7|C9W1B7_RHISA	N/A	N/A	Cytochrome c oxidase subunit OS=Rhipicephalus sanguineus PE=2 SV=1	TRUE	-8.43598	0.00015	207981	284356	203874	287282	14332.9	11064.9	-76375.2	0.73141	-0.135839	1.36722	0.451248
567	286	tr|G3ML11|G3ML11_9ACAR	N/A	N/A	Uncharacterized protein OS=Amblyomma maculatum PE=2 SV=1	TRUE	-8.23392	0.00017	257114	316316	260063	316529	9902.03	10427.8	-59202.6	0.812837	-0.0899963	1.23026	0.298961
568	855	tr|Q8I6X5|Q8I6X5_RHIMP	N/A	N/A	Antigen B membrane protein OS=Rhipicephalus microplus GN=AgB PE=2 SV=1	TRUE	-8.30637	0.00017	30797.2	51477.8	30271.8	51735.1	4476.51	2180.8	-20680.6	0.598262	-0.223109	1.67151	0.741151
569	872	tr|A0A224YYL3|A0A224YYL3_9ACAR	N/A	N/A	ATP synthase subunit alpha OS=Rhipicephalus zambeziensis PE=3 SV=1	TRUE	-8.23221	0.00017	409516	510359	413347	507703	17454.2	17192.7	-100843	0.802407	-0.0956053	1.24625	0.317594
570	942	tr|Q9XYR3|Q9XYR3_RHIMP	N/A	N/A	Carboxylesterase-related protein (Fragment) OS=Rhipicephalus microplus PE=2 SV=1	TRUE	8.26744	0.00017	386189	185561	375572	184982	47734.8	8773.19	200627	2.08119	0.318312	0.480494	-1.05741
571	26	tr|A0A131Z9H5|A0A131Z9H5_RHIAP	N/A	N/A	Laminin, beta 1 (Fragment) OS=Rhipicephalus appendiculatus PE=4 SV=1	TRUE	-8.21637	0.00018	914154	1.14081e+06	900739	1.15445e+06	38062.4	39939.7	-226656	0.80132	-0.0961938	1.24794	0.319549
572	509	tr|A0A224Z0D2|A0A224Z0D2_9ACAR	N/A	N/A	Histidine ammonia-lyase OS=Rhipicephalus zambeziensis PE=3 SV=1	TRUE	8.18932	0.00018	304460	153821	307823	164893	25711.8	26312.3	150639	1.97931	0.296514	0.505226	-0.984998
573	515	tr|L7M2D0|L7M2D0_9ACAR	N/A	N/A	Putative mitochondrial chaperonin OS=Rhipicephalus pulchellus PE=2 SV=1	TRUE	-8.20062	0.00018	158349	227446	157227	231959	10404.4	13256.1	-69096.7	0.696206	-0.157262	1.43636	0.522414
574	912	tr|A0A023FLD4|A0A023FLD4_9ACAR	N/A	N/A	Putative acetyl-coa acetyltransferase OS=Amblyomma cajennense PE=2 SV=1	TRUE	8.15563	0.00018	139629	108905	140587	108464	6722.71	3401.51	30723.4	1.28211	0.107925	0.779964	-0.35852
575	955	tr|L7LZT3|L7LZT3_9ACAR	N/A	N/A	Putative xaa-pro dipeptidase OS=Rhipicephalus pulchellus PE=2 SV=1	TRUE	-8.14229	0.00018	40251.4	57480.8	41584.5	57456.2	3591.35	2238.87	-17229.3	0.700259	-0.154741	1.42804	0.514039
576	1075	tr|L7M801|L7M801_9ACAR	N/A	N/A	Putative translocase of outer membrane 40 OS=Rhipicephalus pulchellus PE=2 SV=1	TRUE	-8.21857	0.00018	15627.4	28343	15549.5	28529.7	700.132	3014.09	-12715.5	0.551369	-0.258558	1.81367	0.85891
577	1008	tr|A0A224Z4R6|A0A224Z4R6_9ACAR	N/A	N/A	NADH dehydrogenase (Ubiquinone) 1 beta subcomplex subunit 6 OS=Rhipicephalus zambeziensis PE=4 SV=1	TRUE	-8.12815	0.00019	104196	249288	103983	252458	20281.8	29380.7	-145093	0.417973	-0.378852	2.3925	1.25852
578	553	tr|L7LXH0|L7LXH0_9ACAR	N/A	N/A	Uncharacterized protein OS=Rhipicephalus pulchellus PE=2 SV=1	TRUE	-8.00278	0.0002	132601	173097	133091	172951	7393.6	6910.7	-40495.8	0.766051	-0.115742	1.3054	0.384488
579	824	tr|L7M3R3|L7M3R3_9ACAR	N/A	N/A	Putative cargo transport protein OS=Rhipicephalus pulchellus PE=2 SV=1	TRUE	-8.03002	0.0002	91452.8	132162	91008.1	132609	3220.68	9614.01	-40708.7	0.691978	-0.159908	1.44513	0.531203
580	652	tr|L7M5T3|L7M5T3_9ACAR	N/A	N/A	Proteasome subunit alpha type OS=Rhipicephalus pulchellus PE=2 SV=1	TRUE	7.86981	0.00022	239949	207945	241159	211338	3781.34	7200.82	32003.7	1.1539	0.06217	0.866623	-0.206524
581	776	tr|L7LWZ7|L7LWZ7_9ACAR	N/A	N/A	Putative maternal expression at 31b OS=Rhipicephalus pulchellus PE=2 SV=1	TRUE	-7.90072	0.00022	30869.1	72725.3	30935.2	73157.8	10270.1	2606.08	-41856.2	0.424461	-0.372162	2.35593	1.23629
582	157	tr|C9W1U0|C9W1U0_RHISA	N/A	N/A	Putative cement protein (Fragment) OS=Rhipicephalus sanguineus PE=2 SV=1	TRUE	-7.84793	0.00023	3.02832e+07	4.53236e+07	3.02248e+07	4.58094e+07	393096	3.81274e+06	-1.50404e+07	0.668156	-0.175122	1.49666	0.581743
583	935	tr|B7QIS3|B7QIS3_IXOSC	N/A	N/A	3-hydroxyacyl-CoA dehydrogenase, putative OS=Ixodes scapularis GN=8041861 PE=4 SV=1	TRUE	-7.82513	0.00023	22199.2	120807	15287.4	123005	20434.6	14751.5	-98607.6	0.183758	-0.735754	5.44195	2.44412
584	462	tr|A0A023FG92|A0A023FG92_9ACAR	N/A	N/A	Uncharacterized protein OS=Amblyomma cajennense PE=2 SV=1	TRUE	-7.74258	0.00024	215317	298477	208532	301969	17779.9	12054.9	-83160	0.721386	-0.141833	1.38622	0.471158
585	610	tr|A0A131XJQ8|A0A131XJQ8_9ACAR	N/A	N/A	Putative inducible metalloproteinase OS=Hyalomma excavatum PE=2 SV=1	TRUE	7.72209	0.00025	23906.6	6735.87	24911.2	6812.33	4317.86	1064.57	17170.7	3.54914	0.550123	0.281758	-1.82747
586	859	tr|L7LQP4|L7LQP4_9ACAR	N/A	N/A	Putative salivary lipocalin OS=Rhipicephalus pulchellus PE=2 SV=1	TRUE	-7.71128	0.00025	202730	577550	202357	612148	10237.7	96672.9	-374820	0.351017	-0.454671	2.84886	1.51039
587	388	tr|F1PG39|F1PG39_CANLF	N/A	N/A	Inter-alpha-trypsin inhibitor heavy chain 2 OS=Canis lupus familiaris GN=ITIH2 PE=4 SV=2	TRUE	7.65427	0.00026	267399	95046.1	263484	87461.8	37423.7	25051.3	172353	2.81336	0.449225	0.355447	-1.49229
588	407	tr|L7LVH9|L7LVH9_9ACAR	N/A	N/A	Histone H3 OS=Rhipicephalus pulchellus PE=2 SV=1	TRUE	-7.63602	0.00026	7.34878e+06	1.05838e+07	7.35739e+06	1.054e+07	546242	647725	-3.23502e+06	0.694342	-0.158427	1.44021	0.526282
589	456	tr|A0A224Z7N5|A0A224Z7N5_9ACAR	N/A	N/A	40S ribosomal protein S21 OS=Rhipicephalus zambeziensis PE=3 SV=1	TRUE	-7.67973	0.00026	98520.1	138366	100264	140606	7235.47	7438.11	-39845.4	0.712028	-0.147503	1.40444	0.489994
590	987	tr|A0A224YC57|A0A224YC57_9ACAR	N/A	N/A	Cathepsin C OS=Rhipicephalus zambeziensis PE=3 SV=1	TRUE	7.6799	0.00026	68743.7	9529.91	66100.7	3840.07	8529.95	12846.4	59213.8	7.21347	0.858144	0.13863	-2.85069
591	1028	tr|G3MSH9|G3MSH9_9ACAR	N/A	N/A	Carboxylic ester hydrolase OS=Amblyomma maculatum PE=2 SV=1	TRUE	-7.63166	0.00026	98546.3	137804	97473.8	141162	4668.83	9167.81	-39258	0.715118	-0.145622	1.39837	0.483747
592	177	tr|A0A131YXB7|A0A131YXB7_RHIAP	N/A	N/A	Transketolase OS=Rhipicephalus appendiculatus PE=4 SV=1	TRUE	-7.60064	0.00027	815277	916686	813566	922341	13337.6	23112	-101409	0.889374	-0.0509155	1.12439	0.169138
593	192	tr|A0A224YTY7|A0A224YTY7_9ACAR	N/A	N/A	Glyceraldehyde-3-phosphate dehydrogenase OS=Rhipicephalus zambeziensis PE=3 SV=1	TRUE	-7.5613	0.00028	2.26876e+06	2.74789e+06	2.21653e+06	2.74886e+06	124886	21555.7	-479134	0.825636	-0.0832114	1.21119	0.276422
594	122	tr|F1PWR2|F1PWR2_CANLF	N/A	N/A	Uncharacterized protein OS=Canis lupus familiaris PE=4 SV=2	TRUE	7.51271	0.00029	560851	148760	593232	149300	108104	18676.9	412091	3.77018	0.576362	0.265239	-1.91463
595	414	tr|Q2VMW0|Q2VMW0_AMBAM	N/A	N/A	Histamine release factor OS=Amblyomma americanum PE=2 SV=1	TRUE	7.46687	0.0003	341622	268712	344487	269050	8828.98	17419.2	72910.2	1.27133	0.104259	0.786576	-0.346341
596	544	tr|E1CAX9|E1CAX9_HAELO	N/A	N/A	Vitellogenin-1 OS=Haemaphysalis longicornis GN=HlVg-1 PE=2 SV=1	TRUE	7.47583	0.0003	3.53704e+06	2.29832e+06	3.51024e+06	2.33289e+06	303168	133829	1.23872e+06	1.53897	0.187229	0.649786	-0.621962
597	666	tr|A0A131YL38|A0A131YL38_RHIAP	N/A	N/A	N-acetylneuraminate lyase OS=Rhipicephalus appendiculatus PE=3 SV=1	TRUE	7.42058	0.00031	187528	97121.1	195641	91443.6	20168.7	13673	90406.8	1.93087	0.285752	0.517902	-0.949249
598	593	tr|A0A034WXH1|A0A034WXH1_RHIMP	N/A	N/A	Vitellogenin 5 (Fragment) OS=Rhipicephalus microplus PE=4 SV=1	TRUE	7.38365	0.00032	89699.8	36336.8	93919.9	36040	13849.5	4137.76	53363	2.46857	0.392445	0.405093	-1.30367
599	993	tr|A0A131YZ91|A0A131YZ91_RHIAP	N/A	N/A	Molybdopterin cofactor sulfurase OS=Rhipicephalus appendiculatus PE=4 SV=1	TRUE	-7.38901	0.00032	26765.9	52939.2	27966.4	54461.7	5711.62	4191.19	-26173.3	0.505597	-0.296195	1.97786	0.98394
600	1063	tr|L7MHT9|L7MHT9_9ACAR	N/A	N/A	Coronin (Fragment) OS=Rhipicephalus pulchellus PE=2 SV=1	TRUE	-7.36477	0.00032	55146.2	75507.1	54868	75451.4	5254.23	1722.2	-20360.9	0.730344	-0.136472	1.36922	0.453351
601	412	tr|A0A224YIR8|A0A224YIR8_9ACAR	N/A	N/A	Uncharacterized protein OS=Rhipicephalus zambeziensis PE=4 SV=1	TRUE	7.34439	0.00033	176519	101923	174375	107492	15190.1	13487.4	74596.3	1.73189	0.238521	0.577403	-0.792349
602	550	tr|A0A224Z194|A0A224Z194_9ACAR	N/A	N/A	Lysozyme OS=Rhipicephalus zambeziensis PE=3 SV=1	TRUE	-7.27365	0.00034	115172	326600	117535	330041	56229.7	14763.5	-211429	0.352638	-0.452671	2.83577	1.50374
603	1049	tr|V5HHG8|V5HHG8_IXORI	N/A	N/A	40S ribosomal protein S30 OS=Ixodes ricinus PE=2 SV=1	TRUE	-7.27326	0.00034	233890	290223	232520	290687	13500.4	7595.66	-56333	0.805897	-0.0937203	1.24085	0.311332
604	128	tr|A0A131YDW8|A0A131YDW8_RHIAP	N/A	N/A	Galectin OS=Rhipicephalus appendiculatus PE=4 SV=1	TRUE	-7.18865	0.00037	144062	396915	125908	399600	66119.8	24020.5	-252853	0.362955	-0.440147	2.75516	1.46214
605	728	tr|L7LZJ5|L7LZJ5_9ACAR	N/A	N/A	Uncharacterized protein OS=Rhipicephalus pulchellus PE=2 SV=1	TRUE	7.15578	0.00038	9937.19	3505.71	9965.2	3476.25	1795.21	91.9167	6431.48	2.83457	0.452488	0.352787	-1.50313
606	895	tr|A0A1E1XEH7|A0A1E1XEH7_9ACAR	N/A	N/A	Glycerol-3-phosphate dehydrogenase [NAD(+)] OS=Amblyomma aureolatum PE=2 SV=1	TRUE	7.14882	0.00038	119149	87903.6	122191	88922.5	8075.3	3347.24	31245.9	1.35546	0.132085	0.737759	-0.438778
607	931	tr|L7M094|L7M094_9ACAR	N/A	N/A	Uncharacterized protein OS=Rhipicephalus pulchellus PE=2 SV=1	TRUE	7.14084	0.00038	45751	11664.3	46502.5	11375.1	9361.95	1870.44	34086.7	3.9223	0.593541	0.254952	-1.9717
608	1032	tr|J9NUI6|J9NUI6_CANLF	N/A	N/A	Alpha-1-microglobulin/bikunin precursor OS=Canis lupus familiaris GN=AMBP PE=4 SV=1	TRUE	7.09474	0.00039	49610.8	12744.5	48850	12512.9	4750.03	9243.51	36866.2	3.89271	0.590252	0.256891	-1.96077
609	1037	tr|G3MPJ6|G3MPJ6_9ACAR	N/A	N/A	Uncharacterized protein OS=Amblyomma maculatum PE=2 SV=1	TRUE	7.11868	0.00039	48519.4	29290.9	48162.8	28433.3	4285.53	3289.2	19228.5	1.65647	0.219183	0.603694	-0.72811
610	180	tr|A0A224YCV5|A0A224YCV5_9ACAR	N/A	N/A	Fatty acid-binding protein 7 OS=Rhipicephalus zambeziensis PE=3 SV=1	TRUE	7.08011	0.0004	972714	571656	987870	554109	99885	53459.9	401058	1.70157	0.23085	0.587692	-0.766869
611	769	tr|L7MAM7|L7MAM7_9ACAR	N/A	N/A	Putative programmed cell death 4 OS=Rhipicephalus pulchellus PE=2 SV=1	TRUE	-7.06615	0.0004	33921.2	59226.2	34415.6	60013	6517.38	2970.24	-25304.9	0.57274	-0.242042	1.74599	0.804047
612	490	tr|A0A224Z379|A0A224Z379_9ACAR	N/A	N/A	Regulator of chromosome condensation OS=Rhipicephalus zambeziensis PE=4 SV=1	TRUE	-7.04662	0.00041	119325	194923	120802	196413	19918.2	7977.9	-75597.8	0.612166	-0.213131	1.63354	0.708005
613	343	tr|L7LWV3|L7LWV3_9ACAR	N/A	N/A	Putative atp-dependent rna helicase OS=Rhipicephalus pulchellus PE=2 SV=1	TRUE	-6.996	0.00042	205555	293138	195997	293136	24793.9	3487.39	-87582.9	0.701223	-0.154144	1.42608	0.512055
614	596	tr|L7M7J5|L7M7J5_9ACAR	N/A	N/A	Putative 20s proteasome regulatory subunit beta type psmb1/pre7 OS=Rhipicephalus pulchellus PE=2 SV=1	TRUE	7.00999	0.00042	135125	103630	136665	102909	7622.48	4757.99	31494.4	1.30391	0.115248	0.766923	-0.382845
615	643	tr|A0A224YVE7|A0A224YVE7_9ACAR	N/A	N/A	Protein containing I-set domain OS=Rhipicephalus zambeziensis PE=4 SV=1	TRUE	6.95466	0.00044	209866	95376.4	215476	94908.3	31281.3	10271.9	114490	2.2004	0.342502	0.454463	-1.13777
616	682	tr|L7M261|L7M261_9ACAR	N/A	N/A	Putative h+ transporting atp synthase subunit e protein OS=Rhipicephalus pulchellus PE=2 SV=1	TRUE	-6.96479	0.00044	273437	379031	267784	379625	26012.6	15581.7	-105594	0.72141	-0.141818	1.38617	0.471109
617	946	tr|L7MGW5|L7MGW5_9ACAR	N/A	N/A	Uncharacterized protein (Fragment) OS=Rhipicephalus pulchellus PE=2 SV=1	TRUE	-6.94869	0.00044	110646	187890	106761	192407	15581.6	15859	-77244.1	0.588887	-0.229968	1.69812	0.763937
618	655	tr|L7M8L1|L7M8L1_9ACAR	N/A	N/A	Putative gdp-l-fucose synthetase OS=Rhipicephalus pulchellus PE=2 SV=1	TRUE	6.89981	0.00046	455113	309434	470956	309685	41387.2	8379.73	145679	1.47079	0.167552	0.679905	-0.556594
619	283	tr|A0A224YPB8|A0A224YPB8_9ACAR	N/A	N/A	Heat shock protein OS=Rhipicephalus zambeziensis PE=3 SV=1	TRUE	6.87096	0.00047	685136	545991	680652	544175	39067.9	10684.2	139146	1.25485	0.0985918	0.796908	-0.327515
620	650	tr|L7LYB6|L7LYB6_9ACAR	N/A	N/A	Uncharacterized protein OS=Rhipicephalus pulchellus PE=2 SV=1	TRUE	6.8633	0.00047	118100	44110.7	118137	51689.8	6156.04	20663.5	73989.7	2.67737	0.427708	0.373501	-1.42081
621	807	tr|L7MII3|L7MII3_9ACAR	N/A	N/A	Putative dimethylglycine dehydrogenase (Fragment) OS=Rhipicephalus pulchellus PE=2 SV=1	TRUE	6.86361	0.00047	12075.9	2161.89	11053	2089.05	2871.16	319.294	9913.98	5.58579	0.747084	0.179026	-2.48176
622	957	tr|L7LSU6|L7LSU6_9ACAR	N/A	N/A	Uncharacterized protein OS=Rhipicephalus pulchellus PE=2 SV=1	TRUE	-6.87899	0.00047	16873.6	30583.2	17473.3	31012.1	3741.15	1375.31	-13709.6	0.551728	-0.258275	1.81249	0.857972
623	988	tr|A0A224Y7G2|A0A224Y7G2_9ACAR	N/A	N/A	MICOS complex subunit OS=Rhipicephalus zambeziensis PE=4 SV=1	TRUE	-6.86787	0.00047	12997	36383.9	11985.9	34713.4	4319.66	5265.35	-23386.9	0.357218	-0.447066	2.79941	1.48512
624	83	tr|A0A224Z8V8|A0A224Z8V8_9ACAR	N/A	N/A	SND1 nuclease domain-containing protein 1 OS=Rhipicephalus zambeziensis PE=4 SV=1	TRUE	-6.83113	0.00048	768049	936051	766087	936186	18137.7	45720.9	-168002	0.820521	-0.0859105	1.21874	0.285389
625	402	tr|A0A224Z3W5|A0A224Z3W5_9ACAR	N/A	N/A	Eukaryotic translation initiation factor 3 subunit I OS=Rhipicephalus zambeziensis PE=3 SV=1	TRUE	-6.83585	0.00048	162683	205855	159699	206901	10685.3	6735.7	-43172.2	0.790279	-0.10222	1.26538	0.339566
626	545	tr|A0A1E1XT30|A0A1E1XT30_9ACAR	N/A	N/A	Putative heat shock-related protein OS=Amblyomma sculptum PE=2 SV=1	TRUE	-6.82809	0.00048	37548.4	120515	48495.6	121463	23640.5	5629.31	-82966.5	0.311566	-0.506449	3.20959	1.68239
627	919	tr|A0A131Z9N8|A0A131Z9N8_RHIAP	N/A	N/A	Farnesoic acid o-methyltransferase (Fragment) OS=Rhipicephalus appendiculatus PE=4 SV=1	TRUE	6.85309	0.00048	55950.2	14188.1	57305.7	12840.7	5869.5	10681.4	41762.1	3.94347	0.595878	0.253584	-1.97946
628	722	tr|A0A034WXI1|A0A034WXI1_RHIMP	N/A	N/A	Alpha2 macroglobulin 1 (Fragment) OS=Rhipicephalus microplus PE=4 SV=1	TRUE	6.81573	0.00049	267280	191952	268068	191852	11277.4	19010.6	75327.2	1.39243	0.143772	0.718171	-0.477601
629	689	tr|A0A1E1XED9|A0A1E1XED9_9ACAR	N/A	N/A	Putative methyltransferase OS=Amblyomma aureolatum PE=2 SV=1	TRUE	6.77647	0.0005	558354	473141	563744	472422	23846.4	7990.89	85213	1.1801	0.071919	0.847385	-0.23891
630	132	tr|A0A224Z4Y4|A0A224Z4Y4_9ACAR	N/A	N/A	Myosin regulatory light chain 12 OS=Rhipicephalus zambeziensis PE=4 SV=1	TRUE	6.70877	0.00053	165440	108064	166058	105461	9136	14460.6	57376.3	1.53095	0.184961	0.65319	-0.614426
631	934	tr|C9W1L2|C9W1L2_RHISA	N/A	N/A	NADH dehydrogenase [ubiquinone] 1 alpha subcomplex subunit 12 OS=Rhipicephalus sanguineus PE=2 SV=1	TRUE	-6.71934	0.00053	16072.5	52142.3	14337.6	51895.7	10690.9	984.663	-36069.8	0.308243	-0.511106	3.24419	1.69786
632	440	tr|G3MQ54|G3MQ54_9ACAR	N/A	N/A	Proteasome subunit beta type OS=Amblyomma maculatum PE=2 SV=1	TRUE	-6.69551	0.00054	189976	264749	191512	266115	11161.4	19346.5	-74773	0.71757	-0.144136	1.39359	0.478808
633	768	tr|L7MBP6|L7MBP6_9ACAR	N/A	N/A	Putative pterin carbinolamine dehydratase pcbd/dimerization cofactor of hnf1 (Fragment) OS=Rhipicephalus pulchellus PE=2 SV=1	TRUE	6.69284	0.00054	127266	66049.1	126652	67041.3	13285.4	12575.4	61216.7	1.92684	0.284845	0.518986	-0.946233
634	714	tr|A0A1E1XAG7|A0A1E1XAG7_9ACAR	N/A	N/A	Putative cytoskeletal regulator flightless-i (Fragment) OS=Amblyomma aureolatum PE=2 SV=1	TRUE	-6.64995	0.00056	167402	270289	168781	260323	10713.7	29029.7	-102887	0.619345	-0.208067	1.61461	0.691184
635	950	tr|L7M5S1|L7M5S1_9ACAR	N/A	N/A	Putative phosphatidylinositol transfer protein OS=Rhipicephalus pulchellus PE=2 SV=1	TRUE	-6.64482	0.00056	50107.7	77226.8	51939	78569.9	6446.9	5006.31	-27119	0.648839	-0.187863	1.54121	0.624067
636	876	tr|A0A1E1X380|A0A1E1X380_9ACAR	N/A	N/A	Putative netrin axonal chemotropic factor (Fragment) OS=Amblyomma aureolatum PE=2 SV=1	TRUE	-6.59986	0.00058	45399.5	193115	28797.7	189047	42863.3	12903	-147715	0.23509	-0.628765	4.25368	2.08871
637	625	tr|A0A131Z2F5|A0A131Z2F5_RHIAP	N/A	N/A	Uncharacterized protein OS=Rhipicephalus appendiculatus PE=4 SV=1	TRUE	6.56606	0.0006	70967.6	46670.2	71221.2	44868.9	6219.49	4011.39	24297.4	1.52062	0.18202	0.657627	-0.604658
638	829	tr|L7LWM6|L7LWM6_9ACAR	N/A	N/A	Putative klingon OS=Rhipicephalus pulchellus PE=2 SV=1	TRUE	-6.55749	0.0006	39643.3	62111.1	39043.2	61370.6	4688.04	4997.95	-22467.7	0.638265	-0.194999	1.56675	0.647772
639	7	tr|L7LWI3|L7LWI3_9ACAR	N/A	N/A	Putative lipoprotein amino terminal region OS=Rhipicephalus pulchellus PE=2 SV=1	TRUE	6.52183	0.00062	5.48097e+06	3.02669e+06	5.63318e+06	2.94423e+06	726269	197475	2.45428e+06	1.81088	0.25789	0.552218	-0.856691
640	56	tr|A0A131Z678|A0A131Z678_RHIAP	N/A	N/A	TIL domain containing protein (Fragment) OS=Rhipicephalus appendiculatus PE=4 SV=1	TRUE	6.51506	0.00062	1.03495e+06	791303	1.03381e+06	795916	72680.7	17657.2	243646	1.30791	0.116576	0.764581	-0.387258
641	306	tr|A0A131Z7V1|A0A131Z7V1_RHIAP	N/A	N/A	Ribosomal protein OS=Rhipicephalus appendiculatus PE=3 SV=1	TRUE	6.48408	0.00064	444442	351575	447098	349202	18640.8	21749.7	92867.7	1.26415	0.101798	0.791047	-0.338165
642	11	tr|A0A224YUL1|A0A224YUL1_9ACAR	N/A	N/A	Lipoprotein amino terminal region OS=Rhipicephalus zambeziensis PE=4 SV=1	TRUE	-6.42152	0.00067	8.15151e+06	9.46928e+06	8.15284e+06	9.41635e+06	355424	205233	-1.31777e+06	0.860838	-0.0650788	1.16166	0.216187
643	385	tr|A0A224YGA0|A0A224YGA0_9ACAR	N/A	N/A	3-hydroxyacyl-CoA dehydrogenase OS=Rhipicephalus zambeziensis PE=4 SV=1	TRUE	-6.32162	0.00073	156558	233701	164985	232934	22964.8	8263.41	-77143.6	0.669905	-0.173987	1.49275	0.577971
644	417	tr|L7M595|L7M595_9ACAR	N/A	N/A	Uncharacterized protein OS=Rhipicephalus pulchellus PE=2 SV=1	TRUE	-6.31778	0.00073	310698	381760	305577	381259	20850.7	8444.97	-71062.3	0.813856	-0.0894523	1.22872	0.297154
645	921	tr|F0JAD9|F0JAD9_AMBVA	N/A	N/A	Cytochrome b-c1 complex subunit 7 OS=Amblyomma variegatum PE=2 SV=1	TRUE	-6.30539	0.00074	93509	196394	105839	195919	32117.1	5784.54	-102885	0.47613	-0.322274	2.10027	1.07057
646	248	tr|A0A0A7DS56|A0A0A7DS56_RHIMP	N/A	N/A	Pyruvate kinase OS=Rhipicephalus microplus PE=2 SV=1	TRUE	-6.2859	0.00075	871645	995386	874393	995629	35663.9	16678.3	-123741	0.875685	-0.0576519	1.14196	0.191516
647	411	tr|L7M6I3|L7M6I3_9ACAR	N/A	N/A	Putative prolyl endopeptidase prolyl oligopeptidase prolyl endopeptidase prolyl oligopeptidase OS=Rhipicephalus pulchellus PE=2 SV=1	TRUE	6.29832	0.00075	88790.2	60550.6	90084.9	59615.2	4198.55	7923.71	28239.5	1.46638	0.166246	0.681952	-0.552258
648	483	tr|L7MM36|L7MM36_9ACAR	N/A	N/A	Putative short-chain alcohol dehydrogenase/3-hydroxyacyl-coa dehydrogenase (Fragment) OS=Rhipicephalus pulchellus PE=2 SV=1	TRUE	6.24073	0.00078	268441	240961	266033	240585	7878.46	3935.66	27480.4	1.11405	0.0469027	0.89763	-0.155808
649	709	tr|A0A131Z103|A0A131Z103_RHIAP	N/A	N/A	Uncharacterized protein OS=Rhipicephalus appendiculatus PE=4 SV=1	TRUE	-6.24188	0.00078	89215.4	162259	93439.9	166514	10151.4	21088.3	-73043.9	0.549832	-0.25977	1.81874	0.862936
650	734	tr|C9W1F7|C9W1F7_RHISA	N/A	N/A	F1F0-type ATP synthase subunit G OS=Rhipicephalus sanguineus PE=2 SV=1	TRUE	-6.23015	0.00079	134928	174759	135999	177640	7999.47	9975.07	-39830.8	0.772082	-0.112337	1.2952	0.373175
651	1019	tr|A0A1E1XV93|A0A1E1XV93_9ACAR	N/A	N/A	Putative secreted peptide (Fragment) OS=Amblyomma sculptum PE=2 SV=1	TRUE	-6.18692	0.00082	17097.1	235332	9736.9	264921	17482	68346.6	-218235	0.0726512	-1.13876	13.7644	3.78287
652	958	tr|L7LRB1|L7LRB1_9ACAR	N/A	N/A	Putative group ii salivary lipocalin OS=Rhipicephalus pulchellus PE=2 SV=1	TRUE	6.16277	0.00084	56746.3	37627.5	58056.3	37609.7	6136.72	915.387	19118.8	1.50811	0.178432	0.663082	-0.59274
653	481	tr|A0A131XDY8|A0A131XDY8_9ACAR	N/A	N/A	Putative small heat shock protein ii OS=Hyalomma excavatum PE=2 SV=1	TRUE	6.10538	0.00088	199851	162293	198808	164387	10639.2	6178.62	37557.6	1.23142	0.0904057	0.812071	-0.300321
654	486	tr|L7MAH9|L7MAH9_9ACAR	N/A	N/A	Succinyl-CoA:3-ketoacid-coenzyme A transferase OS=Rhipicephalus pulchellus PE=2 SV=1	TRUE	-6.0985	0.00089	97668.6	173158	109106	173798	23191.9	8661.94	-75489.5	0.564043	-0.248688	1.77291	0.826123
655	871	tr|G3MLM7|G3MLM7_9ACAR	N/A	N/A	Uncharacterized protein OS=Amblyomma maculatum PE=2 SV=1	TRUE	-6.03446	0.00094	203414	291462	197253	292896	27783.3	8924.58	-88047.4	0.697911	-0.1562	1.43285	0.518885
656	833	tr|G3MIA7|G3MIA7_9ACAR	N/A	N/A	Uncharacterized protein (Fragment) OS=Amblyomma maculatum PE=2 SV=1	TRUE	5.99361	0.00097	33174.3	16579.1	33656.8	16104.4	4278.81	3515.27	16595.2	2.00097	0.301241	0.499757	-1.0007
657	591	tr|L7M6B8|L7M6B8_9ACAR	N/A	N/A	Putative 26s proteasome regulatory complex subunit rpn11 OS=Rhipicephalus pulchellus PE=2 SV=1	TRUE	5.95859	0.001	210591	172224	208888	168905	4648.24	12009.9	38367.4	1.22278	0.087347	0.817811	-0.29016
658	309	tr|G3MMT5|G3MMT5_9ACAR	N/A	N/A	Uncharacterized protein OS=Amblyomma maculatum PE=2 SV=1	TRUE	5.94997	0.00101	2.45723e+06	1.50947e+06	2.47479e+06	1.36799e+06	74166.7	309823	947760	1.62788	0.211622	0.614297	-0.702992
659	952	tr|L7M3Y3|L7M3Y3_9ACAR	N/A	N/A	Uncharacterized protein OS=Rhipicephalus pulchellus PE=2 SV=1	TRUE	-5.93265	0.00102	7811.3	31986.4	7893.05	31399.4	4568.35	6749.08	-24175.1	0.244207	-0.612242	4.09489	2.03382
660	1015	tr|L7MMU0|L7MMU0_9ACAR	N/A	N/A	Galectin (Fragment) OS=Rhipicephalus pulchellus PE=2 SV=1	TRUE	-5.90599	0.00105	87554	104732	88214.9	104888	2453.3	5274.45	-17177.8	0.835983	-0.0778027	1.1962	0.258455
661	303	tr|A0A224Z940|A0A224Z940_9ACAR	N/A	N/A	Thioredoxin OS=Rhipicephalus zambeziensis PE=3 SV=1	TRUE	5.8827	0.00107	252476	142932	262817	152490	25996.5	26668.5	109544	1.76641	0.247091	0.566121	-0.820818
662	746	tr|L7MEP4|L7MEP4_9ACAR	N/A	N/A	Putative phosphoglucomutase/phosphomannomutase (Fragment) OS=Rhipicephalus pulchellus PE=2 SV=1	TRUE	5.86172	0.00109	89321.3	71952.1	88211.2	71418.6	3592.44	4713.31	17369.1	1.2414	0.0939111	0.805543	-0.311966
663	173	tr|A0A131YX76|A0A131YX76_RHIAP	N/A	N/A	Cysteine proteinase OS=Rhipicephalus appendiculatus PE=3 SV=1	TRUE	-5.85167	0.0011	1.5273e+06	2.35066e+06	1.54087e+06	2.40762e+06	108548	259633	-823362	0.649732	-0.187266	1.5391	0.622084
664	284	tr|A0A224Z7S1|A0A224Z7S1_9ACAR	N/A	N/A	Thioredoxin/protein disulfide isomerase OS=Rhipicephalus zambeziensis PE=3 SV=1	TRUE	5.85206	0.0011	338676	213888	354507	218520	40329.8	13868.3	124788	1.58343	0.199599	0.631541	-0.663053
665	1059	tr|L7MK14|L7MK14_9ACAR	N/A	N/A	Putative translation initiation factor if-2 (Fragment) OS=Rhipicephalus pulchellus PE=2 SV=1	TRUE	-5.84269	0.00111	14698	32976.1	16287.6	33356.1	4930.61	3851.75	-18278.1	0.445716	-0.350942	2.24358	1.1658
666	20	tr|A0A224Z9V2|A0A224Z9V2_9ACAR	N/A	N/A	Transitional endoplasmic reticulum ATPase OS=Rhipicephalus zambeziensis PE=3 SV=1	TRUE	5.80428	0.00115	1.56858e+06	1.37632e+06	1.57266e+06	1.37776e+06	62460	22078.2	192259	1.13969	0.0567869	0.877431	-0.188642
667	731	tr|A0A224YMZ1|A0A224YMZ1_9ACAR	N/A	N/A	Dehydrogenase/reductase SDR family member 4 OS=Rhipicephalus zambeziensis PE=4 SV=1	TRUE	5.8001	0.00115	121301	77609.7	121594	74038.5	1017.45	15031.4	43691.6	1.56297	0.193949	0.639809	-0.644286
668	57	tr|L7MMT8|L7MMT8_9ACAR	N/A	N/A	Putative tick thioester protein (Fragment) OS=Rhipicephalus pulchellus PE=2 SV=1	TRUE	5.75118	0.0012	615109	439053	619851	436894	37178.4	48643.7	176057	1.40099	0.146436	0.71378	-0.486449
669	81	tr|A0A224Z329|A0A224Z329_9ACAR	N/A	N/A	Ubiquitin-activating enzyme E1 OS=Rhipicephalus zambeziensis PE=3 SV=1	TRUE	5.68089	0.00128	595703	293817	564543	291798	103729	23154.1	301887	2.02747	0.306954	0.493227	-1.01968
670	499	tr|A0A224ZBS6|A0A224ZBS6_9ACAR	N/A	N/A	Uridine monophosphate synthetase OS=Rhipicephalus zambeziensis PE=3 SV=1	TRUE	-5.63851	0.00133	63812.8	89182.8	62682.3	87882.4	3678.21	8212.77	-25370	0.715528	-0.145373	1.39757	0.48292
671	683	tr|A0A224YEU2|A0A224YEU2_9ACAR	N/A	N/A	Serine protease inhibitor OS=Rhipicephalus zambeziensis PE=3 SV=1	TRUE	-5.58928	0.00139	71141.9	85760.3	71190.7	86378.8	3153.82	4173.21	-14618.5	0.829543	-0.0811612	1.20548	0.269612
672	856	tr|L7M3X5|L7M3X5_9ACAR	N/A	N/A	Uncharacterized protein OS=Rhipicephalus pulchellus PE=2 SV=1	TRUE	5.59359	0.00139	51768.8	25392.5	51535.7	29078.4	2995.67	8942.46	26376.3	2.03874	0.309362	0.490499	-1.02768
673	900	tr|A0A034WZ83|A0A034WZ83_RHIMP	N/A	N/A	Secreted protein 28 (Fragment) OS=Rhipicephalus microplus PE=4 SV=1	TRUE	5.593	0.00139	312242	270392	314263	269349	11899.9	9074.7	41850.2	1.15478	0.0624978	0.865969	-0.207613
674	870	tr|A0A224YJB7|A0A224YJB7_9ACAR	N/A	N/A	Alpha-2-macroglobiln splicing variant 1 OS=Rhipicephalus zambeziensis PE=4 SV=1	TRUE	5.56828	0.00142	475562	338265	479291	337839	45226.1	19659.2	137297	1.40589	0.147951	0.711294	-0.491482
675	1077	tr|A0A224ZAL7|A0A224ZAL7_9ACAR	N/A	N/A	Translation initiation factor 5 OS=Rhipicephalus zambeziensis PE=4 SV=1	TRUE	-5.56979	0.00142	43962.5	69867.5	43563.2	69225.7	8514.78	3745.11	-25905.1	0.629226	-0.201194	1.58925	0.66835
676	176	tr|A0A224Z4A2|A0A224Z4A2_9ACAR	N/A	N/A	Phosphoribosylformylglycinamidine synthase OS=Rhipicephalus zambeziensis PE=3 SV=1	TRUE	5.56307	0.00143	270732	201432	273460	200822	22114.1	11475.1	69299.4	1.34403	0.12841	0.744029	-0.426569
677	834	tr|A0A224YS21|A0A224YS21_9ACAR	N/A	N/A	1,2-dihydroxy-3-keto-5-methylthiopentene dioxygenase-like OS=Rhipicephalus zambeziensis PE=4 SV=1	TRUE	-5.54183	0.00146	45127.6	64124.4	46506.2	64904.2	4245.54	5383.02	-18996.7	0.703752	-0.152581	1.42096	0.506862
678	258	tr|L7M716|L7M716_9ACAR	N/A	N/A	Putative ribosomal protein s9 OS=Rhipicephalus pulchellus PE=2 SV=1	TRUE	-5.50582	0.00151	832488	2.26959e+06	822599	2.41363e+06	27227.8	521319	-1.4371e+06	0.366801	-0.435569	2.72627	1.44693
679	479	tr|A0A224Z1Q9|A0A224Z1Q9_9ACAR	N/A	N/A	Large subunit ribosomal protein L28e OS=Rhipicephalus zambeziensis PE=4 SV=1	TRUE	5.47842	0.00155	161267	68866.1	173956	67398.2	33584.1	3160.81	92400.6	2.34174	0.369539	0.427032	-1.22758
680	982	tr|A0A224YJB0|A0A224YJB0_9ACAR	N/A	N/A	Uncharacterized protein OS=Rhipicephalus zambeziensis PE=4 SV=1	TRUE	5.45357	0.00158	66149.5	49744.7	65505.9	49732.5	5919.53	1074.02	16404.8	1.32978	0.12378	0.752004	-0.411188
681	539	tr|A0A224Y1W2|A0A224Y1W2_9ACAR	N/A	N/A	Basic tail secreted protein OS=Rhipicephalus zambeziensis PE=4 SV=1	TRUE	5.43047	0.00162	37469	8668.63	37230.9	5509.98	4056.57	9800.62	28800.4	4.32237	0.635722	0.231354	-2.11182
682	730	tr|A0A131XNT2|A0A131XNT2_9ACAR	N/A	N/A	Putative ubiquinone oxidoreductase ndufa9/39kda subunit OS=Hyalomma excavatum PE=2 SV=1	TRUE	-5.42134	0.00163	41513.7	88184.5	48154.2	87878.2	16581.8	4635.21	-46670.8	0.47076	-0.327201	2.12423	1.08694
683	430	tr|A0A224ZBD7|A0A224ZBD7_9ACAR	N/A	N/A	UTP-glucose-1-phosphate uridylyltransferase OS=Rhipicephalus zambeziensis PE=4 SV=1	TRUE	-5.41131	0.00165	89819.6	119836	90714.3	117520	6479.13	9005.43	-30016.5	0.74952	-0.125217	1.33419	0.415961
684	375	tr|Q86G63|Q86G63_DERVA	N/A	N/A	40S ribosomal protein S11 OS=Dermacentor variabilis PE=2 SV=1	TRUE	-5.40384	0.00166	489120	1.23644e+06	489429	1.35849e+06	4578.83	276552	-747322	0.395587	-0.402758	2.52789	1.33793
685	518	tr|A0A224ZAB3|A0A224ZAB3_9ACAR	N/A	N/A	Sulfiredoxin OS=Rhipicephalus zambeziensis PE=3 SV=1	TRUE	5.38931	0.00168	377119	216522	394359	213165	57419.5	15968.6	160598	1.74172	0.240977	0.574146	-0.80051
686	905	tr|A0A1E1XN62|A0A1E1XN62_9ACAR	N/A	N/A	Putative actin-2 (Fragment) OS=Amblyomma sculptum PE=2 SV=1	TRUE	5.37025	0.00171	3.46956e+06	2.92529e+06	3.48014e+06	2.92777e+06	194675	56457.1	544266	1.18606	0.0741049	0.843131	-0.246171
687	319	tr|L7M861|L7M861_9ACAR	N/A	N/A	Putative tropomodulin OS=Rhipicephalus pulchellus PE=2 SV=1	TRUE	-5.30428	0.00182	235908	373105	226337	373969	51561.7	4177.57	-137197	0.632283	-0.199088	1.58157	0.661357
688	505	tr|A0A131XIF4|A0A131XIF4_9ACAR	N/A	N/A	Putative calpain-a OS=Hyalomma excavatum PE=2 SV=1	TRUE	5.29631	0.00184	357427	269552	347173	279169	26562.9	19888.6	87874.9	1.326	0.122545	0.754146	-0.407085
689	415	tr|A0A224YR29|A0A224YR29_9ACAR	N/A	N/A	Cytochrome c oxidase subunit 5a OS=Rhipicephalus zambeziensis PE=4 SV=1	TRUE	-5.28796	0.00185	434471	587759	436794	595211	54673	19289.9	-153288	0.7392	-0.131238	1.35281	0.435964
690	706	tr|A0A131XNW8|A0A131XNW8_9ACAR	N/A	N/A	Putative thimet oligopeptidase (Fragment) OS=Hyalomma excavatum PE=2 SV=1	TRUE	5.28288	0.00186	89212.9	62049.5	88994.3	62004.3	8600.05	5638.33	27163.4	1.43777	0.157689	0.695522	-0.523832
691	1006	tr|A0A224YW23|A0A224YW23_9ACAR	N/A	N/A	Poly [ADP-ribose] polymerase OS=Rhipicephalus zambeziensis PE=4 SV=1	TRUE	-5.2774	0.00187	38749	52287.8	38660.2	52927.2	4192.66	2957.58	-13538.8	0.741072	-0.13014	1.3494	0.432315
692	944	tr|L7MJF6|L7MJF6_9ACAR	N/A	N/A	GrpE protein homolog (Fragment) OS=Rhipicephalus pulchellus PE=2 SV=1	TRUE	5.23938	0.00194	8657.22	4963.81	8321.69	4947.6	1360.68	369.157	3693.41	1.74407	0.241563	0.573372	-0.802455
693	327	tr|L7M579|L7M579_9ACAR	N/A	N/A	Dolichyl-diphosphooligosaccharide--protein glycosyltransferase 48 kDa subunit OS=Rhipicephalus pulchellus PE=2 SV=1	TRUE	-5.23073	0.00196	336225	506821	343587	502683	59797.2	26057.7	-170595	0.663401	-0.178224	1.50738	0.592047
694	297	tr|A0A224Z9G4|A0A224Z9G4_9ACAR	N/A	N/A	Sulfotransferase OS=Rhipicephalus zambeziensis PE=4 SV=1	TRUE	-5.20422	0.00201	195644	291115	192071	288277	11510.5	34837.6	-95471.3	0.67205	-0.172598	1.48798	0.57336
695	695	tr|A0A224YW44|A0A224YW44_9ACAR	N/A	N/A	Estradiol 17-beta-dehydrogenase 8-like OS=Rhipicephalus zambeziensis PE=4 SV=1	TRUE	-5.1707	0.00207	227187	259943	230845	262266	10389	7251.98	-32755.8	0.873988	-0.0584944	1.14418	0.194314
696	780	tr|A0A131Z060|A0A131Z060_RHIAP	N/A	N/A	Superoxide dismutase OS=Rhipicephalus appendiculatus PE=3 SV=1	TRUE	5.15299	0.00211	55845.2	14444.1	56345.9	10881.8	7918.59	13982.2	41401	3.86629	0.587295	0.258646	-1.95095
697	845	tr|L7MF21|L7MF21_9ACAR	N/A	N/A	Putative f-actin capping protein alpha subunit (Fragment) OS=Rhipicephalus pulchellus PE=2 SV=1	TRUE	5.10703	0.00221	48732.3	19541.3	47381.4	24638.1	2959.87	11041.9	29191	2.49381	0.396864	0.400992	-1.31835
698	494	tr|A0A131XFQ9|A0A131XFQ9_9ACAR	N/A	N/A	Putative aldo/keto reductase family OS=Hyalomma excavatum PE=2 SV=1	TRUE	5.09883	0.00222	331086	269820	328171	268927	20794.5	12045.7	61266	1.22706	0.0888667	0.814954	-0.295209
699	844	tr|E2REU6|E2REU6_CANLF	N/A	N/A	Uncharacterized protein OS=Canis lupus familiaris GN=KRT18 PE=3 SV=2	TRUE	-5.05825	0.00231	133325	257150	125774	268085	31900.1	37140.4	-123825	0.518473	-0.285274	1.92874	0.947659
700	831	tr|V5I2J4|V5I2J4_IXORI	N/A	N/A	Putative transcription factor ctbp (Fragment) OS=Ixodes ricinus PE=2 SV=1	TRUE	5.02877	0.00238	66878.1	59037	66511.3	59402.2	1956.62	2428.32	7841.13	1.13282	0.0541598	0.882755	-0.179915
701	418	tr|L7MF07|L7MF07_9ACAR	N/A	N/A	Putative glutaryl-coa dehydrogenase (Fragment) OS=Rhipicephalus pulchellus PE=2 SV=1	TRUE	-5.02657	0.00239	109179	284393	101854	289321	27996.5	63846.4	-175213	0.383904	-0.415778	2.60482	1.38118
702	565	tr|A0A224YCS2|A0A224YCS2_9ACAR	N/A	N/A	Metallopeptidase OS=Rhipicephalus zambeziensis PE=4 SV=1	TRUE	5.00902	0.00243	106016	90467.1	107993	91637.7	5097.96	3543	15548.6	1.17187	0.0688794	0.853337	-0.228812
703	583	tr|A0A224Z4C6|A0A224Z4C6_9ACAR	N/A	N/A	tRNA-splicing ligase RtcB homolog OS=Rhipicephalus zambeziensis PE=3 SV=1	TRUE	-4.99071	0.00248	54572.6	78619.6	54484.3	76008.4	6267.99	7319.73	-24047	0.694135	-0.158556	1.44064	0.526712
704	317	tr|A0A224Z062|A0A224Z062_9ACAR	N/A	N/A	Succinate--CoA ligase [ADP-forming] subunit beta, mitochondrial OS=Rhipicephalus zambeziensis PE=3 SV=1	TRUE	4.98519	0.00249	198244	166935	196326	166275	7006.99	10424.9	31309.3	1.18755	0.0746535	0.842067	-0.247994
705	452	tr|A0A224YXN2|A0A224YXN2_9ACAR	N/A	N/A	Ras-related protein Rab-1A OS=Rhipicephalus zambeziensis PE=4 SV=1	TRUE	4.92133	0.00265	186640	134971	186913	140637	6648.99	19917.4	51668.9	1.38282	0.140764	0.723162	-0.467609
706	873	tr|A0A224Z2I6|A0A224Z2I6_9ACAR	N/A	N/A	Inosine-5'-monophosphate dehydrogenase OS=Rhipicephalus zambeziensis PE=3 SV=1	TRUE	-4.91902	0.00266	932945	1.12555e+06	938906	1.11928e+06	69234.3	36597.9	-192610	0.828876	-0.0815105	1.20645	0.270772
707	551	tr|L7MK98|L7MK98_9ACAR	N/A	N/A	Uncharacterized protein (Fragment) OS=Rhipicephalus pulchellus PE=2 SV=1	TRUE	4.88741	0.00275	82360.6	47343.2	86925.1	47007.3	13553.2	4652.69	35017.4	1.73965	0.240462	0.574828	-0.798797
708	533	tr|L7LZY7|L7LZY7_9ACAR	N/A	N/A	Putative 26s proteasome regulatory complex subunit OS=Rhipicephalus pulchellus PE=2 SV=1	TRUE	-4.86219	0.00282	63000.5	78848	62487.9	77113.8	3800.38	5296.2	-15847.4	0.799013	-0.0974462	1.25154	0.323709
709	563	tr|L7M5B4|L7M5B4_9ACAR	N/A	N/A	Putative 3-hydroxyacyl-coa dehydrogenase OS=Rhipicephalus pulchellus PE=2 SV=1	TRUE	-4.81702	0.00295	144759	160364	144036	161257	6065.33	2278.04	-15604.8	0.902692	-0.0444606	1.1078	0.147695
710	631	tr|A0A1E1X4N1|A0A1E1X4N1_9ACAR	N/A	N/A	S-(hydroxymethyl)glutathione dehydrogenase OS=Amblyomma aureolatum PE=2 SV=1	TRUE	-4.77533	0.00308	105580	131356	104998	129346	2725.72	10445.6	-25775.9	0.803771	-0.0948675	1.24413	0.315143
711	282	tr|L7M4H1|L7M4H1_9ACAR	N/A	N/A	Proteasome subunit alpha type OS=Rhipicephalus pulchellus PE=2 SV=1	TRUE	4.77027	0.00309	393473	319413	391767	328982	13882.6	27774.5	74060.1	1.23186	0.0905625	0.811778	-0.300842
712	792	tr|A0A224YKA4|A0A224YKA4_9ACAR	N/A	N/A	Crystallin alpha B OS=Rhipicephalus zambeziensis PE=3 SV=1	TRUE	4.72802	0.00323	99860.2	76889.1	99462	76695.9	9645.24	1178.93	22971.1	1.29876	0.113528	0.769967	-0.377131
713	1041	tr|A0A131YXX9|A0A131YXX9_RHIAP	N/A	N/A	Ankyrin OS=Rhipicephalus appendiculatus PE=4 SV=1	TRUE	-4.72575	0.00324	14914.2	37070.3	18504.6	36702.7	7840.62	5142.77	-22156.1	0.402323	-0.395425	2.48557	1.31357
714	828	tr|L7LXE1|L7LXE1_9ACAR	N/A	N/A	Putative calmodulin OS=Rhipicephalus pulchellus PE=2 SV=1	TRUE	4.70878	0.0033	107832	59205.4	105946	59912.5	7086.73	19399.7	48626.5	1.82132	0.260386	0.549053	-0.864984
715	387	tr|L7LTU7|L7LTU7_9ACAR	N/A	N/A	Putative methylenetetrahydrofolate dehydrogenase/methylenetetrahydrofolate cyclohydrolase OS=Rhipicephalus pulchellus PE=2 SV=1	TRUE	4.63761	0.00355	921906	836347	913407	833541	33803.1	14792.6	85559.5	1.1023	0.0423004	0.907193	-0.140519
716	674	tr|A0A224YL44|A0A224YL44_9ACAR	N/A	N/A	TIL domain containing protein OS=Rhipicephalus zambeziensis PE=4 SV=1	TRUE	4.612	0.00365	163215	138917	163682	137335	3507.6	9935.7	24297.6	1.17491	0.0700034	0.851131	-0.232546
717	534	tr|A0A224Z9J1|A0A224Z9J1_9ACAR	N/A	N/A	T-complex protein 1 subunit epsilon OS=Rhipicephalus zambeziensis PE=3 SV=1	TRUE	4.58004	0.00377	140389	115496	139485	117439	3232.99	10378.6	24893.7	1.21554	0.0847685	0.822681	-0.281595
718	853	tr|L7M1L6|L7M1L6_9ACAR	N/A	N/A	Putative scaffold attachment factor b OS=Rhipicephalus pulchellus PE=2 SV=1	TRUE	-4.55384	0.00388	15072.5	26625.2	16396	27403	3947.33	3187.85	-11552.7	0.566098	-0.247108	1.76648	0.820876
719	527	tr|L7M7I9|L7M7I9_9ACAR	N/A	N/A	Putative gdp-mannose pyrophosphorylase/mannose-1-phosphate guanylyltransferase OS=Rhipicephalus pulchellus PE=2 SV=1	TRUE	-4.50896	0.00407	66160.4	104221	72325.4	101903	14372	8857.19	-38060.3	0.634811	-0.197356	1.57527	0.655601
720	482	tr|A0A224YPN8|A0A224YPN8_9ACAR	N/A	N/A	ATP synthase subunit d, mitochondrial OS=Rhipicephalus zambeziensis PE=3 SV=1	TRUE	-4.48293	0.00418	756909	1.19188e+06	778229	1.24918e+06	80545.1	176550	-434968	0.635056	-0.197188	1.57466	0.655044
721	149	tr|L7MG42|L7MG42_9ACAR	N/A	N/A	Putative alkyl hydroperoxide reductase thiol specific antioxidant (Fragment) OS=Rhipicephalus pulchellus PE=2 SV=1	TRUE	-4.44796	0.00434	1.30637e+06	1.41577e+06	1.29327e+06	1.41685e+06	34397.5	35166.4	-109402	0.922726	-0.0349272	1.08375	0.116026
722	270	tr|A0A131YVP0|A0A131YVP0_RHIAP	N/A	N/A	Spectrin beta chain OS=Rhipicephalus appendiculatus PE=3 SV=1	TRUE	-4.41068	0.00452	139640	216723	137247	218707	34676.6	4388.19	-77083.7	0.644322	-0.190897	1.55202	0.634147
723	766	tr|A0A131YGT1|A0A131YGT1_RHIAP	N/A	N/A	Myosin heavy chain 6/7 OS=Rhipicephalus appendiculatus PE=3 SV=1	TRUE	-4.40122	0.00456	23853.9	54610.8	25189	53380.6	13274.9	4372.68	-30756.9	0.436798	-0.359719	2.28939	1.19496
724	981	tr|A0A224YJC7|A0A224YJC7_9ACAR	N/A	N/A	Alpha-L-fucosidase (Fragment) OS=Rhipicephalus zambeziensis PE=4 SV=1	TRUE	4.38827	0.00463	99966.1	31862.3	98869.4	22819.2	12293.8	28500.5	68103.7	3.13744	0.496575	0.318732	-1.64959
725	628	tr|L7M2B2|L7M2B2_9ACAR	N/A	N/A	Translocon-associated protein subunit beta OS=Rhipicephalus pulchellus PE=2 SV=1	TRUE	-4.37815	0.00468	70539.8	84269.1	70996	85218.9	4747.31	4098.45	-13729.2	0.837078	-0.0772338	1.19463	0.256565
726	446	tr|L7MHB4|L7MHB4_9ACAR	N/A	N/A	Putative atp-citrate lyase (Fragment) OS=Rhipicephalus pulchellus PE=2 SV=1	TRUE	4.36888	0.00472	142067	53626.3	135743	44229.6	32013.3	24785.5	88440.9	2.64921	0.423116	0.377471	-1.40556
727	516	tr|A0A224YTE5|A0A224YTE5_9ACAR	N/A	N/A	Amidophosphoribosyltransferase OS=Rhipicephalus zambeziensis PE=3 SV=1	TRUE	4.36373	0.00475	146843	101258	149452	101401	20339.1	4776.92	45584.7	1.45018	0.161422	0.689569	-0.536233
728	740	tr|F1PCE8|F1PCE8_CANLF	N/A	N/A	Uncharacterized protein OS=Canis lupus familiaris GN=LOC475521 PE=3 SV=1	TRUE	-4.35939	0.00477	3.38658e+06	4.50946e+06	3.38614e+06	4.68346e+06	238189	456786	-1.12289e+06	0.750993	-0.124364	1.33157	0.413128
729	408	tr|B7PXR0|B7PXR0_IXOSC	N/A	N/A	Elongation factor Tu (Fragment) OS=Ixodes scapularis GN=8032902 PE=3 SV=1	TRUE	-4.35749	0.00478	91247.3	174261	98077.2	174133	37726.4	5332.59	-83013.3	0.523626	-0.280979	1.90976	0.933393
730	975	tr|A0A224ZBX2|A0A224ZBX2_9ACAR	N/A	N/A	Zinc finger CCCH domain-containing protein 11A OS=Rhipicephalus zambeziensis PE=4 SV=1	TRUE	-4.35457	0.0048	46601.9	56862.6	47137.6	56170.9	3439.96	3221.07	-10260.7	0.819553	-0.0864227	1.22018	0.28709
731	60	tr|A0A224YQ72|A0A224YQ72_9ACAR	N/A	N/A	Gelsolin OS=Rhipicephalus zambeziensis PE=4 SV=1	TRUE	-4.34889	0.00483	343165	406872	343324	412168	13805.5	25841.1	-63706.2	0.843424	-0.0739539	1.18564	0.245669
732	692	tr|A0A131Z420|A0A131Z420_RHIAP	N/A	N/A	Glutathione S-transferase OS=Rhipicephalus appendiculatus PE=4 SV=1	TRUE	4.34075	0.00487	114734	85306.4	114230	82036.6	3573.66	13079.5	29427.9	1.34497	0.128712	0.743512	-0.427571
733	922	tr|A0A131XCV1|A0A131XCV1_9ACAR	N/A	N/A	Putative conserved secreted protein OS=Hyalomma excavatum PE=2 SV=1	TRUE	4.3319	0.00492	60636.8	48903.1	59473.8	48110.1	3778.89	3881.67	11733.6	1.23994	0.0933994	0.806493	-0.310266
734	484	tr|A0A131XPB8|A0A131XPB8_9ACAR	N/A	N/A	Transaldolase OS=Hyalomma excavatum PE=2 SV=1	TRUE	4.31733	0.005	144799	92507.3	144255	99256.8	18524	15609.7	52291.6	1.56527	0.194589	0.638867	-0.646411
735	268	tr|L7LZX8|L7LZX8_9ACAR	N/A	N/A	Putative alanine aminotransferase OS=Rhipicephalus pulchellus PE=2 SV=1	TRUE	-4.30942	0.00504	304953	339995	307872	343542	9047.28	13514.1	-35042.1	0.896934	-0.0472397	1.11491	0.156927
736	774	tr|L7M953|L7M953_9ACAR	N/A	N/A	Uncharacterized protein OS=Rhipicephalus pulchellus PE=2 SV=1	TRUE	4.29502	0.00512	11431.9	4161.57	11115.8	3786.78	1680.25	2939.07	7270.33	2.74702	0.438861	0.364031	-1.45787
737	1039	tr|A0A0C9SBJ2|A0A0C9SBJ2_AMBAM	N/A	N/A	Cytochrome b-c1 complex subunit 6 OS=Amblyomma americanum PE=2 SV=1	TRUE	-4.29294	0.00513	8069.25	21140.3	8974.56	22823.6	4263.92	4347.63	-13071.1	0.381699	-0.418279	2.61986	1.38949
738	560	tr|A0A224YL20|A0A224YL20_9ACAR	N/A	N/A	Determination of adult lifespan OS=Rhipicephalus zambeziensis PE=4 SV=1	TRUE	4.26096	0.00532	259335	218476	262466	219767	18467.5	5172.65	40858.8	1.18702	0.0744569	0.842448	-0.247341
739	239	tr|A0A0S2ZX71|A0A0S2ZX71_9ACAR	N/A	N/A	Cathepsin L OS=Rhipicephalus haemaphysaloides haemaphysaloides PE=2 SV=1	TRUE	4.25478	0.00535	347265	268052	345582	264108	10814.4	35629.7	79212.9	1.29551	0.112442	0.771895	-0.373524
740	1031	tr|L7M6E9|L7M6E9_9ACAR	N/A	N/A	Putative wbp2-like protein OS=Rhipicephalus pulchellus PE=2 SV=1	TRUE	-4.24729	0.0054	53833.4	61348.7	54534.6	61847.4	2569.34	2433.52	-7515.28	0.877499	-0.0567533	1.1396	0.188531
741	977	tr|A0A224Z3V5|A0A224Z3V5_9ACAR	N/A	N/A	M7GpppX diphosphatase OS=Rhipicephalus zambeziensis PE=4 SV=1	TRUE	4.22255	0.00555	10111.7	2073.75	11209.3	1751.55	3695.35	915.954	8037.97	4.87605	0.688069	0.205084	-2.28571
742	923	tr|A0A023GGV6|A0A023GGV6_9ACAR	N/A	N/A	Putative 15-hydroxyprostaglandin dehydrogenase OS=Amblyomma triste PE=2 SV=1	TRUE	4.21076	0.00562	249669	228517	246731	227942	8645.36	5117.97	21152.1	1.09256	0.0384463	0.915279	-0.127716
743	821	tr|V5IIH4|V5IIH4_IXORI	N/A	N/A	Putative rna-binding protein musashi/mrna cleavage and polyadenylation factor i complex (Fragment) OS=Ixodes ricinus PE=2 SV=1	TRUE	4.18606	0.00577	120236	100415	116876	99681.6	7425.47	5877.65	19821.4	1.19739	0.0782374	0.835146	-0.259899
744	594	tr|L7MMB5|L7MMB5_9ACAR	N/A	N/A	6-phosphogluconate dehydrogenase, decarboxylating (Fragment) OS=Rhipicephalus pulchellus PE=2 SV=1	TRUE	4.17217	0.00586	140967	93053	140633	103441	3580.19	22687.6	47913.9	1.51491	0.180387	0.660105	-0.599232
745	441	tr|A0A034WXN6|A0A034WXN6_RHIMP	N/A	N/A	Hemelipoprotein HeLp 2 (Fragment) OS=Rhipicephalus microplus PE=4 SV=1	TRUE	-4.17035	0.00588	1.35214e+06	1.51101e+06	1.36794e+06	1.50054e+06	67210.1	35883.4	-158868	0.894859	-0.0482452	1.11749	0.160267
746	669	tr|A0A131XJZ4|A0A131XJZ4_9ACAR	N/A	N/A	Cytochrome b-c1 complex subunit 7 OS=Hyalomma excavatum PE=2 SV=1	TRUE	-4.16349	0.00592	93689.2	129511	87107.4	129209	17004.9	2633.84	-35821.9	0.723407	-0.140617	1.38235	0.467121
747	816	tr|L7M3J7|L7M3J7_9ACAR	N/A	N/A	H/ACA ribonucleoprotein complex subunit OS=Rhipicephalus pulchellus PE=2 SV=1	TRUE	-4.1537	0.00599	57796.2	139392	72024.3	139386	38340.3	8578.63	-81595.9	0.41463	-0.382339	2.41179	1.2701
748	133	tr|A0A131Z3W6|A0A131Z3W6_RHIAP	N/A	N/A	D-3-phosphoglycerate dehydrogenase OS=Rhipicephalus appendiculatus PE=3 SV=1	TRUE	4.14495	0.00605	1.2757e+06	1.05511e+06	1.26448e+06	1.05452e+06	102079	30134.2	220582	1.20906	0.0824479	0.827089	-0.273886
749	236	tr|F1Q0R0|F1Q0R0_CANLF	N/A	N/A	Keratin 14 OS=Canis lupus familiaris GN=KRT14 PE=3 SV=2	TRUE	-4.1368	0.0061	64696.2	113511	62558.2	117927	18190.1	15036.4	-48814.8	0.569955	-0.244159	1.75452	0.811079
750	795	tr|F1PNY2|F1PNY2_CANLF	N/A	N/A	Uncharacterized protein OS=Canis lupus familiaris PE=4 SV=2	TRUE	4.13082	0.00614	19669.7	3724.46	18264.1	3892.14	7675.62	828.075	15945.3	5.28123	0.722735	0.18935	-2.40088
751	392	tr|L7MFP6|L7MFP6_9ACAR	N/A	N/A	Uncharacterized protein (Fragment) OS=Rhipicephalus pulchellus PE=2 SV=1	TRUE	-4.11898	0.00622	284837	375153	293948	377821	42990.1	8658.03	-90315.4	0.759257	-0.119611	1.31708	0.39734
752	393	tr|A0A224YDY6|A0A224YDY6_9ACAR	N/A	N/A	Cystatin-A/B OS=Rhipicephalus zambeziensis PE=4 SV=1	TRUE	-4.10277	0.00634	1.03226e+06	1.13619e+06	1.02344e+06	1.13665e+06	41566.3	28964.3	-103928	0.908529	-0.0416611	1.10068	0.138395
753	835	tr|L7M8C2|L7M8C2_9ACAR	N/A	N/A	Putative aspartyl-trna synthetase OS=Rhipicephalus pulchellus PE=2 SV=1	TRUE	-4.05106	0.00672	16885.3	29208.4	19378.9	28844.2	5594.17	2391.39	-12323.1	0.578098	-0.237999	1.72981	0.790615
754	438	tr|A0A034WXL2|A0A034WXL2_RHIMP	N/A	N/A	Salivary lipid-interacting protein 1 OS=Rhipicephalus microplus PE=4 SV=1	TRUE	-4.02868	0.00689	105738	128641	105611	128859	8093.85	7985.22	-22902.8	0.821963	-0.0851478	1.2166	0.282855
755	271	tr|A0A131YQ75|A0A131YQ75_RHIAP	N/A	N/A	Transglutaminase/protease like proteins OS=Rhipicephalus appendiculatus PE=4 SV=1	TRUE	-4.00493	0.00708	155393	244158	162918	239817	38077.3	22694.6	-88764.3	0.636447	-0.196238	1.57122	0.651888
756	280	tr|C9W1T0|C9W1T0_RHISA	N/A	N/A	Secreted protein (Fragment) OS=Rhipicephalus sanguineus PE=2 SV=1	TRUE	3.97577	0.00732	756832	461003	783748	452700	101701	108642	295829	1.64171	0.215295	0.609122	-0.715196
757	818	tr|A0A131XMH8|A0A131XMH8_9ACAR	N/A	N/A	ATP synthase subunit alpha (Fragment) OS=Hyalomma excavatum PE=2 SV=1	TRUE	-3.96067	0.00745	862042	1.00219e+06	854424	987785	55233.8	44245.2	-140148	0.860158	-0.0654218	1.16258	0.217327
758	1071	tr|L7M3Z4|L7M3Z4_9ACAR	N/A	N/A	Uncharacterized protein OS=Rhipicephalus pulchellus PE=2 SV=1	TRUE	3.93016	0.00771	243432	218515	245724	219322	11913.5	4340.91	24916.6	1.11403	0.0468956	0.897645	-0.155784
759	630	tr|A0A131XGP6|A0A131XGP6_9ACAR	N/A	N/A	Putative trna-specific adenosine deaminase 1 OS=Hyalomma excavatum PE=2 SV=1	TRUE	-3.90979	0.00789	113194	171461	121486	166924	27004.5	12614.1	-58266.4	0.660176	-0.18034	1.51475	0.599077
760	786	tr|A0A224Z2C8|A0A224Z2C8_9ACAR	N/A	N/A	Mannose-1-phosphate guanylyltransferase OS=Rhipicephalus zambeziensis PE=4 SV=1	TRUE	3.89183	0.00806	7867.03	3157.72	7849.71	3383.91	1662.56	1758.63	4709.3	2.49136	0.396436	0.401387	-1.31693
761	102	tr|L7MIP5|L7MIP5_9ACAR	N/A	N/A	Putative dihydroorotase (Fragment) OS=Rhipicephalus pulchellus PE=2 SV=1	TRUE	3.88546	0.00812	130610	94813.5	127343	98228	15812	9460.06	35796.5	1.37755	0.139106	0.725928	-0.462101
762	24	tr|J9JHF7|J9JHF7_CANLF	N/A	N/A	Uncharacterized protein OS=Canis lupus familiaris GN=LOC100855540 PE=3 SV=1	TRUE	3.87873	0.00818	5.9153e+07	3.85726e+07	5.84811e+07	3.95616e+07	1.03334e+07	2.41503e+06	2.05804e+07	1.53355	0.185698	0.652082	-0.616874
763	940	tr|V5IFJ9|V5IFJ9_IXORI	N/A	N/A	Putative cut up OS=Ixodes ricinus PE=2 SV=1	TRUE	3.8674	0.00829	266379	195756	269858	198487	34300.1	12545.9	70623.6	1.36077	0.133786	0.734876	-0.444428
764	605	sp|P60952|CDC42_CANLF	N/A	N/A	Cell division control protein 42 homolog OS=Canis lupus familiaris GN=CDC42 PE=2 SV=2	TRUE	-3.85891	0.00837	55969.3	68272.7	55542.7	69222.3	2822.7	5717.84	-12303.4	0.81979	-0.0862972	1.21982	0.286673
765	110	tr|A0A131YM09|A0A131YM09_RHIAP	N/A	N/A	Alpha-N-acetylgalactosaminidase OS=Rhipicephalus appendiculatus PE=3 SV=1	TRUE	3.83256	0.00863	1.77425e+06	1.63672e+06	1.76261e+06	1.63553e+06	65461.1	29419.9	137528	1.08403	0.03504	0.922487	-0.1164
766	394	tr|C9W1T4|C9W1T4_RHISA	N/A	N/A	Putative cement protein (Fragment) OS=Rhipicephalus sanguineus PE=2 SV=1	TRUE	-3.78995	0.00907	1.05657e+06	1.40258e+06	1.05263e+06	1.41026e+06	164493	79261.8	-346010	0.753304	-0.12303	1.32748	0.408695
767	251	tr|A0A224YQ49|A0A224YQ49_9ACAR	N/A	N/A	26S proteasome regulatory subunit T3 OS=Rhipicephalus zambeziensis PE=3 SV=1	TRUE	3.75189	0.00949	156707	136701	156583	136568	8374.86	6602.28	20005.7	1.14635	0.0593157	0.872337	-0.197043
768	325	tr|L7M0L6|L7M0L6_9ACAR	N/A	N/A	Putative rna-binding protein elav/hu rrm superfamily OS=Rhipicephalus pulchellus PE=2 SV=1	TRUE	-3.70246	0.01006	382256	505327	399228	509489	65950.8	8380.08	-123072	0.756451	-0.121219	1.32196	0.402681
769	641	tr|L7M2A3|L7M2A3_9ACAR	N/A	N/A	40S ribosomal protein S27 OS=Rhipicephalus pulchellus PE=2 SV=1	TRUE	-3.67974	0.01033	375582	595036	430440	595901	117838	18469.7	-219454	0.631192	-0.199838	1.5843	0.663849
770	994	tr|A0A131YL33|A0A131YL33_RHIAP	N/A	N/A	Low density lipoprotein-related protein 2 OS=Rhipicephalus appendiculatus PE=4 SV=1	TRUE	3.6765	0.01037	80266.8	38281.1	80432.2	29060.8	8384.52	21245.4	41985.7	2.09677	0.321551	0.476924	-1.06817
771	997	tr|A0A131XPX1|A0A131XPX1_9ACAR	N/A	N/A	Putative ubiquinone oxidoreductase ndufa2/b8 subunit (Fragment) OS=Hyalomma excavatum PE=2 SV=1	TRUE	-3.65997	0.01058	29379.6	49000.1	34300.5	48097.7	10482.5	2252.23	-19620.5	0.599582	-0.222152	1.66783	0.737971
772	737	tr|L7LXH5|L7LXH5_9ACAR	N/A	N/A	Putative emp24/gp25l/p24 family of membrane trafficking OS=Rhipicephalus pulchellus PE=2 SV=1	TRUE	-3.65203	0.01068	97460.2	171405	98465.9	170189	15540.3	37394.7	-73944.9	0.568596	-0.245196	1.75872	0.814525
773	800	tr|D0URY2|D0URY2_9ACAR	N/A	N/A	Triosephosphate isomerase (Fragment) OS=Amblyomma sp. 'Amb2' PE=2 SV=1	TRUE	3.64097	0.01082	212897	180347	207117	181014	17608.1	3104.41	32549.6	1.18048	0.0720597	0.847111	-0.239377
774	753	tr|L7MJK7|L7MJK7_9ACAR	N/A	N/A	Putative polyc-binding hnrnp-k protein hrb57a/hnrnp (Fragment) OS=Rhipicephalus pulchellus PE=2 SV=1	TRUE	-3.61584	0.01115	65094.1	126320	80801.3	127020	33413.1	5515.36	-61225.7	0.515312	-0.28793	1.94057	0.956482
775	561	tr|A0A131YHR2|A0A131YHR2_RHIAP	N/A	N/A	Glutathione S-transferase OS=Rhipicephalus appendiculatus PE=4 SV=1	TRUE	3.60409	0.01131	364312	338543	363809	336527	10446.3	9765.64	25769.4	1.07612	0.0318601	0.929266	-0.105837
776	704	tr|Q8I862|Q8I862_DERVA	N/A	N/A	Factor D-like protein OS=Dermacentor variabilis PE=2 SV=1	TRUE	3.55375	0.01202	93837.3	74237.3	94524.2	71419.2	4783.88	9939.24	19600	1.26402	0.101753	0.791128	-0.338018
777	581	tr|A0A224Z324|A0A224Z324_9ACAR	N/A	N/A	Lipoprotein amino terminal region (Fragment) OS=Rhipicephalus zambeziensis PE=4 SV=1	TRUE	-3.54379	0.01216	111180	168264	106494	166907	28552.8	14921.2	-57084.3	0.660746	-0.179966	1.51344	0.597833
778	416	tr|Q6B8B6|Q6B8B6_9ACAR	N/A	N/A	Ribosomal protein S15 OS=Ixodes pacificus PE=2 SV=1	TRUE	-3.54024	0.01222	73882.9	122588	74237.7	119772	22207.4	16245	-48704.7	0.602695	-0.219903	1.65921	0.7305
779	316	tr|A0A0C9S2Q4|A0A0C9S2Q4_AMBAM	N/A	N/A	Putative 26s proteasome regulatory complex atpase rpt2 (Fragment) OS=Amblyomma americanum PE=2 SV=1	TRUE	3.5192	0.01253	280631	238138	288968	236600	22523	8711.78	42492.8	1.17844	0.0713065	0.848581	-0.236875
780	198	tr|A0A131YRS4|A0A131YRS4_RHIAP	N/A	N/A	F479582_1 paramyosin OS=Rhipicephalus appendiculatus PE=4 SV=1	TRUE	-3.48155	0.01312	313653	456732	321830	465057	52150.4	63529.9	-143080	0.686732	-0.163213	1.45617	0.542182
781	72	tr|A0A224Z3B3|A0A224Z3B3_9ACAR	N/A	N/A	V-type H+-transporting ATPase subunit B OS=Rhipicephalus zambeziensis PE=3 SV=1	TRUE	-3.47722	0.01319	598843	679851	603412	683682	42406.3	19304.8	-81008.2	0.880844	-0.0551009	1.13527	0.183041
782	570	tr|A0A131YH55|A0A131YH55_RHIAP	N/A	N/A	Niemann-Pick type C1 domain-containing protein OS=Rhipicephalus appendiculatus PE=4 SV=1	TRUE	3.4547	0.01355	52675	44972.7	53459	44298.3	3191.7	3113.84	7702.31	1.17127	0.0686557	0.853777	-0.228069
783	836	tr|A0A224Z7Y4|A0A224Z7Y4_9ACAR	N/A	N/A	Ribosomal protein l37a OS=Rhipicephalus zambeziensis PE=3 SV=1	TRUE	-3.41302	0.01427	99055.2	172582	98862.4	178715	5126.16	42779.8	-73526.4	0.573962	-0.241117	1.74228	0.800973
784	724	tr|A0A224YDD6|A0A224YDD6_9ACAR	N/A	N/A	Peptidyl-prolyl cis-trans isomerase OS=Rhipicephalus zambeziensis PE=3 SV=1	TRUE	3.40536	0.0144	103073	87216.4	102997	87683.8	9145.78	1755.82	15856.7	1.18181	0.0725471	0.846161	-0.240996
785	247	tr|A0A131XG35|A0A131XG35_9ACAR	N/A	N/A	Uncharacterized protein OS=Hyalomma excavatum PE=2 SV=1	TRUE	3.39126	0.01465	174098	146987	180618	146523	14554.5	6617.28	27110.1	1.18444	0.0735124	0.844282	-0.244203
786	77	tr|A0A224YH73|A0A224YH73_9ACAR	N/A	N/A	Aldehyde dehydrogenase family 7 member A1 OS=Rhipicephalus zambeziensis PE=3 SV=1	TRUE	-3.3861	0.01475	425778	463298	422143	465111	18726.7	11850.3	-37520	0.919015	-0.0366772	1.08812	0.121839
787	287	tr|L7M840|L7M840_9ACAR	N/A	N/A	Putative multifunctional chaperone 14-3-3 family OS=Rhipicephalus pulchellus PE=2 SV=1	TRUE	3.37791	0.0149	608713	522428	615531	531319	15387.8	48715.6	86285.5	1.16516	0.0663865	0.858249	-0.220531
788	259	tr|L7MFK2|L7MFK2_9ACAR	N/A	N/A	Putative ca2+-binding actin-bundling protein (Fragment) OS=Rhipicephalus pulchellus PE=2 SV=1	TRUE	-3.34205	0.01557	323616	357539	326391	361155	17464	10350.6	-33923.2	0.90512	-0.0432937	1.10483	0.143819
789	767	tr|A0A224YUN9|A0A224YUN9_9ACAR	N/A	N/A	Cap gly domain containing linker protein 1 OS=Rhipicephalus zambeziensis PE=4 SV=1	TRUE	3.33682	0.01567	98917.5	73423.3	97948.6	77509.1	5535.19	14242.8	25494.2	1.34722	0.129439	0.742268	-0.429989
790	201	tr|A0A131YMK5|A0A131YMK5_RHIAP	N/A	N/A	Uncharacterized protein OS=Rhipicephalus appendiculatus PE=4 SV=1	TRUE	3.31951	0.01601	2.52451e+06	2.22671e+06	2.53568e+06	2.23549e+06	170022	57324.7	297802	1.13374	0.0545139	0.882036	-0.181091
791	866	tr|L7MHZ0|L7MHZ0_9ACAR	N/A	N/A	Putative acyl-coa synthetase (Fragment) OS=Rhipicephalus pulchellus PE=2 SV=1	TRUE	3.31116	0.01618	28736.3	6486.17	32787.6	4802.22	12652.6	4531.23	22250.1	4.4304	0.646443	0.225713	-2.14744
792	621	tr|A0A224Z2V8|A0A224Z2V8_9ACAR	N/A	N/A	Isobutyryl-CoA dehydrogenase OS=Rhipicephalus zambeziensis PE=3 SV=1	TRUE	-3.28205	0.01678	41913.5	45884.4	42342.2	45502.1	1361.02	2000.75	-3970.93	0.913458	-0.0393114	1.09474	0.13059
793	1044	tr|A0A224YWG2|A0A224YWG2_9ACAR	N/A	N/A	Prostamide/prostaglandin F2alpha synthase OS=Rhipicephalus zambeziensis PE=4 SV=1	TRUE	-3.2723	0.01699	72227	91158.3	70058.3	93046.4	6115.82	9822.19	-18931.2	0.792326	-0.101096	1.26211	0.335835
794	103	tr|A0A224ZBZ2|A0A224ZBZ2_9ACAR	N/A	N/A	Wd40 repeat stress protein/actin OS=Rhipicephalus zambeziensis PE=4 SV=1	TRUE	3.26403	0.01716	179317	117648	186433	130867	24534	28739.4	61669.2	1.52418	0.183037	0.656089	-0.608037
795	1068	tr|L7MKP8|L7MKP8_9ACAR	N/A	N/A	Putative acyl-coenzyme a thioesterase 9 mitochondrial (Fragment) OS=Rhipicephalus pulchellus PE=2 SV=1	TRUE	-3.2556	0.01734	25104.7	31161.2	24533.8	30802.8	2855.62	2385.17	-6056.54	0.805638	-0.0938598	1.24125	0.311796
796	1016	tr|L7LSQ5|L7LSQ5_9ACAR	N/A	N/A	Putative cysteine proteinase cathepsin f OS=Rhipicephalus pulchellus PE=2 SV=1	TRUE	-3.23349	0.01783	18051.8	47622.9	16315	47868.6	17788.3	4256.44	-29571	0.379058	-0.421294	2.63812	1.39951
797	400	tr|A0A224YNT5|A0A224YNT5_9ACAR	N/A	N/A	Glyoxylate/hydroxypyruvate reductase OS=Rhipicephalus zambeziensis PE=3 SV=1	TRUE	-3.21862	0.01817	286189	358894	278703	357213	41288.8	18337.6	-72705	0.797419	-0.0983133	1.25405	0.32659
798	372	tr|V5HZY4|V5HZY4_IXORI	N/A	N/A	Putative transcriptional activator protein (Fragment) OS=Ixodes ricinus PE=2 SV=1	TRUE	-3.21729	0.0182	110116	128808	112106	127999	10509.3	4958.1	-18692.7	0.85488	-0.0680947	1.16975	0.226206
799	754	tr|C9W1P0|C9W1P0_RHISA	N/A	N/A	Ribosomal protein L21 OS=Rhipicephalus sanguineus PE=2 SV=1	TRUE	-3.21591	0.01823	84895.1	128382	84828	140759	5829.23	26409.3	-43487.2	0.661268	-0.179623	1.51225	0.596693
800	735	tr|L7M1K9|L7M1K9_9ACAR	N/A	N/A	Putative mrna cleavage and polyadenylation factor i complex subunit rna14 OS=Rhipicephalus pulchellus PE=2 SV=1	TRUE	3.20782	0.01842	5198.09	2336.77	5386.83	2242.24	1717.37	482.891	2861.32	2.22448	0.347228	0.449544	-1.15347
801	964	tr|G3MPE6|G3MPE6_9ACAR	N/A	N/A	Cystatin OS=Amblyomma maculatum PE=2 SV=1	TRUE	3.20629	0.01845	7906.39	606.259	9683.29	677.932	4547.11	243.685	7300.13	13.0413	1.11532	0.0766796	-3.70501
802	403	tr|A0A224YKX4|A0A224YKX4_9ACAR	N/A	N/A	Delta(3,5)-Delta(2,4)-dienoyl-CoA isomerase OS=Rhipicephalus zambeziensis PE=4 SV=1	TRUE	3.20448	0.0185	144192	110651	143095	113146	4077.59	20532.9	33541	1.30313	0.114986	0.767386	-0.381976
803	470	tr|B7PA50|B7PA50_IXOSC	N/A	N/A	Cuticular protein, putative OS=Ixodes scapularis GN=8026845 PE=4 SV=1	TRUE	3.18505	0.01895	630362	547744	624297	563060	15050.7	49648	82618.8	1.15083	0.061013	0.868934	-0.202681
804	672	tr|A0A224YSA5|A0A224YSA5_9ACAR	N/A	N/A	Large subunit ribosomal protein L14e OS=Rhipicephalus zambeziensis PE=4 SV=1	TRUE	-3.17862	0.01911	324760	433354	328745	452677	10243.8	67555.1	-108593	0.749411	-0.12528	1.33438	0.41617
805	508	tr|A0A224YG77|A0A224YG77_9ACAR	N/A	N/A	26S proteasome regulatory subunit N10 OS=Rhipicephalus zambeziensis PE=4 SV=1	TRUE	-3.17824	0.01912	4120.61	6342.14	4509.03	6218.72	1047.46	925.804	-2221.53	0.649719	-0.187274	1.53913	0.622112
806	29	tr|A0A224YPR9|A0A224YPR9_9ACAR	N/A	N/A	Catalase OS=Rhipicephalus zambeziensis PE=3 SV=1	TRUE	-3.17731	0.01914	4.22911e+06	5.51431e+06	4.157e+06	5.13193e+06	220794	778273	-1.2852e+06	0.766933	-0.115242	1.30389	0.382827
807	616	tr|L7M6K1|L7M6K1_9ACAR	N/A	N/A	Uncharacterized protein OS=Rhipicephalus pulchellus PE=2 SV=1	TRUE	3.1768	0.01915	66268.2	33794.3	67874.1	42022.4	8007.81	18810.8	32473.9	1.96093	0.292461	0.509963	-0.971535
808	1018	tr|L7M570|L7M570_9ACAR	N/A	N/A	Putative kynurenine aminotransferase glutamine transaminase k OS=Rhipicephalus pulchellus PE=2 SV=1	TRUE	-3.17435	0.01921	59782.3	64136.3	59917.3	64377.8	1313.58	2408.28	-4353.99	0.932113	-0.0305312	1.07283	0.101422
809	1072	tr|V5IJI8|V5IJI8_IXORI	N/A	N/A	Putative rab7 member ras oncoprotein family OS=Ixodes ricinus PE=2 SV=1	TRUE	3.14009	0.02007	80471.3	42372.8	81596.3	43313.6	4093.62	23918	38098.5	1.89913	0.278554	0.526558	-0.925335
810	140	tr|V5HMU2|V5HMU2_IXORI	N/A	N/A	Putative 14-3-3 logues OS=Ixodes ricinus PE=2 SV=1	TRUE	-3.11294	0.02077	1.90739e+06	2.20599e+06	1.91177e+06	2.18925e+06	180976	63650.1	-298598	0.864642	-0.0631635	1.15655	0.209825
811	729	tr|A0A224YTE8|A0A224YTE8_9ACAR	N/A	N/A	Methylmalonate-semialdehyde dehydrogenase OS=Rhipicephalus zambeziensis PE=4 SV=1	TRUE	-3.10527	0.02097	145193	169513	144550	170964	13640.9	7700.3	-24320.9	0.856525	-0.0672599	1.16751	0.223432
812	311	tr|L7LSI2|L7LSI2_9ACAR	N/A	N/A	Putative lysine-ketoglutarate reductase/saccharopine dehydrogenase OS=Rhipicephalus pulchellus PE=2 SV=1	TRUE	-3.09847	0.02116	183459	242649	181734	243689	33737.1	17930	-59189.6	0.756069	-0.121439	1.32263	0.403411
813	694	tr|G3MML4|G3MML4_9ACAR	N/A	N/A	Transgelin OS=Amblyomma maculatum PE=2 SV=1	TRUE	3.09498	0.02125	152552	128471	155314	129912	13966.7	6862.02	24081	1.18744	0.074613	0.842145	-0.247859
814	464	sp|O18840|ACTB_CANLF	N/A	N/A	Actin, cytoplasmic 1 OS=Canis lupus familiaris GN=ACTB PE=2 SV=3	TRUE	-3.07813	0.02171	102791	240361	98754.8	242117	88901.1	9293.97	-137570	0.427652	-0.36891	2.33835	1.22549
815	48	tr|L7M880|L7M880_9ACAR	N/A	N/A	Rab GDP dissociation inhibitor OS=Rhipicephalus pulchellus PE=2 SV=1	TRUE	3.07199	0.02189	90843	68347.1	89241	73528.2	8469.87	11948.3	22495.9	1.32914	0.123571	0.752365	-0.410495
816	314	tr|A0A224YJV6|A0A224YJV6_9ACAR	N/A	N/A	Clathrin heavy chain OS=Rhipicephalus zambeziensis PE=3 SV=1	TRUE	-3.05093	0.02249	90247.7	98188.1	90214.7	98480.2	2265.62	4686.29	-7940.39	0.919131	-0.0366227	1.08798	0.121658
817	40	tr|A0A131YYS9|A0A131YYS9_RHIAP	N/A	N/A	Serpin B OS=Rhipicephalus appendiculatus PE=3 SV=1	TRUE	3.03278	0.02302	940054	381246	1.09284e+06	386444	368252	13832.8	558808	2.46574	0.391948	0.405557	-1.30202
818	134	tr|J9NTL7|J9NTL7_CANLF	N/A	N/A	Uncharacterized protein OS=Canis lupus familiaris GN=CFH PE=4 SV=1	TRUE	3.03117	0.02306	684315	339783	673295	329012	40130.6	223756	344532	2.01398	0.304054	0.49653	-1.01005
819	597	tr|A0A131YPZ7|A0A131YPZ7_RHIAP	N/A	N/A	Glutathione S-transferase OS=Rhipicephalus appendiculatus PE=4 SV=1	TRUE	3.03078	0.02307	181475	163359	179078	162373	10746.7	5237.54	18116.6	1.1109	0.0456753	0.90017	-0.15173
820	401	tr|A0A224YKD3|A0A224YKD3_9ACAR	N/A	N/A	Crystallin alpha B OS=Rhipicephalus zambeziensis PE=3 SV=1	TRUE	-3.02764	0.02317	778685	889553	779062	905404	49828.5	53673.5	-110868	0.875366	-0.0578101	1.14238	0.192041
821	1038	tr|A0A224Z4E8|A0A224Z4E8_9ACAR	N/A	N/A	Microsomal epoxide hydrolase OS=Rhipicephalus zambeziensis PE=4 SV=1	TRUE	3.02266	0.02332	35253.9	1622.85	43450.6	1471.92	22243.5	638.143	33631	21.7235	1.33693	0.0460332	-4.44118
822	893	tr|B7PKN7|B7PKN7_IXOSC	N/A	N/A	GMP synthase, putative (Fragment) OS=Ixodes scapularis GN=8052995 PE=4 SV=1	TRUE	3.01351	0.02359	27893.9	24319.3	27834.7	23934.4	1921.98	1390.67	3574.53	1.14698	0.059557	0.871853	-0.197844
823	304	tr|L7M5K4|L7M5K4_9ACAR	N/A	N/A	Putative chloride intracellular channel 6-like protein OS=Rhipicephalus pulchellus PE=2 SV=1	TRUE	-2.99884	0.02404	350075	436085	352446	437879	57083.8	5645.61	-86010.3	0.802767	-0.0954104	1.24569	0.316947
824	690	tr|A0A131YTB9|A0A131YTB9_RHIAP	N/A	N/A	Uncharacterized protein OS=Rhipicephalus appendiculatus PE=4 SV=1	TRUE	-2.9924	0.02424	75899	108115	76952.4	102529	9910.75	19115.6	-32216.3	0.702019	-0.153651	1.42446	0.510417
825	618	tr|B7PKP2|B7PKP2_IXOSC	N/A	N/A	Uncharacterized protein OS=Ixodes scapularis GN=8053001 PE=4 SV=1	TRUE	2.99066	0.0243	285684	228076	288640	225299	37612.3	8336.95	57607.9	1.25258	0.0978062	0.798351	-0.324905
826	1027	tr|A0A224YYN1|A0A224YYN1_9ACAR	N/A	N/A	F actin capping protein beta subunit OS=Rhipicephalus zambeziensis PE=4 SV=1	TRUE	2.96611	0.02508	68734.9	40326	68108.6	47469.2	11787.9	15099.2	28409	1.70448	0.231593	0.586688	-0.769335
827	703	tr|A0A224YXN9|A0A224YXN9_9ACAR	N/A	N/A	Elongation factor Ts, mitochondrial OS=Rhipicephalus zambeziensis PE=3 SV=1	TRUE	-2.93526	0.02611	72826.3	105538	80992.3	107279	21664	5240.08	-32711.6	0.690048	-0.16112	1.44917	0.53523
828	585	tr|L7LZM3|L7LZM3_9ACAR	N/A	N/A	Putative cytochrome c OS=Rhipicephalus pulchellus PE=2 SV=1	TRUE	-2.93088	0.02626	277529	291933	277829	290564	8510.23	4919.16	-14404.7	0.950657	-0.021976	1.0519	0.0730026
829	459	tr|L7MJY0|L7MJY0_9ACAR	N/A	N/A	Putative talin (Fragment) OS=Rhipicephalus pulchellus PE=2 SV=1	TRUE	-2.9195	0.02665	24644.3	29353.6	23871.2	28616	2543.56	1984.48	-4709.33	0.839565	-0.0759455	1.19109	0.252286
830	1003	tr|L7M4S9|L7M4S9_9ACAR	N/A	N/A	Putative caspase OS=Rhipicephalus pulchellus PE=2 SV=1	TRUE	2.91297	0.02688	22516.5	8423.73	25368.3	6236.39	7844.59	5664.3	14092.7	2.67298	0.426996	0.374114	-1.41845
831	1034	tr|A0A224YL22|A0A224YL22_9ACAR	N/A	N/A	Calcium-binding protein OS=Rhipicephalus zambeziensis PE=4 SV=1	TRUE	2.9117	0.02692	19893.7	3770.84	23739.5	3736.7	11030.1	991.148	16122.8	5.27566	0.722277	0.18955	-2.39935
832	847	tr|E2RSC2|E2RSC2_CANLF	N/A	N/A	Alpha hemoglobin stabilizing protein OS=Canis lupus familiaris GN=AHSP PE=4 SV=1	TRUE	2.89951	0.02735	23575.5	1682.79	30839.7	1578.28	15080.2	791.501	21892.7	14.0098	1.14643	0.0713788	-3.80836
833	662	tr|L7MB29|L7MB29_9ACAR	N/A	N/A	Putative transcription factor nfat subunit nf45 OS=Rhipicephalus pulchellus PE=2 SV=1	TRUE	2.89717	0.02744	133129	95844	136646	102506	19100.5	17253	37285.1	1.38902	0.142708	0.719933	-0.474066
834	370	tr|L7MB61|L7MB61_9ACAR	N/A	N/A	Serine/threonine-protein phosphatase OS=Rhipicephalus pulchellus PE=2 SV=1	TRUE	-2.88729	0.02779	234359	253173	231220	253698	7917.42	10352	-18814.5	0.925685	-0.0335366	1.08028	0.111406
835	799	tr|E2RLN1|E2RLN1_CANLF	N/A	N/A	Serpin family D member 1 OS=Canis lupus familiaris GN=SERPIND1 PE=3 SV=1	TRUE	2.85897	0.02884	97041.5	8266.37	122417	8192.27	61998.8	3593.23	88775.2	11.7393	1.06964	0.0851838	-3.55328
836	467	tr|V5HVL1|V5HVL1_IXORI	N/A	N/A	Putative small nuclear ribonucleoprotein d1 OS=Ixodes ricinus PE=2 SV=1	TRUE	2.8383	0.02963	39728.5	25283.6	41750.8	24947.4	9511.86	3623.37	14445	1.57132	0.196265	0.636408	-0.651977
837	352	tr|Q19V51|Q19V51_DERVA	N/A	N/A	Hemelipoglycoprotein OS=Dermacentor variabilis PE=2 SV=1	TRUE	2.81184	0.03068	4.19745e+06	3.9564e+06	4.22824e+06	3.97778e+06	152077	79181.6	241053	1.06093	0.0256856	0.942572	-0.0853258
838	220	tr|A0A224Z3Y0|A0A224Z3Y0_9ACAR	N/A	N/A	RNA-binding protein Musashi OS=Rhipicephalus zambeziensis PE=4 SV=1	TRUE	-2.75021	0.03328	583424	1.19691e+06	573624	1.1984e+06	239830	376191	-613486	0.487441	-0.312077	2.05153	1.0367
839	822	tr|C9W1L0|C9W1L0_RHISA	N/A	N/A	Phosphohistidine phosphatase 1 OS=Rhipicephalus sanguineus PE=2 SV=1	TRUE	-2.74147	0.03367	65998.1	87277.8	67603.3	84813.9	5394.93	14556.7	-21279.7	0.756184	-0.121372	1.32243	0.40319
840	567	tr|A0A023FSF1|A0A023FSF1_9ACAR	N/A	N/A	Galectin (Fragment) OS=Amblyomma parvum PE=2 SV=1	TRUE	2.73564	0.03393	54434.8	39904.2	58220.2	40213.9	10410.1	2116.86	14530.6	1.36414	0.134858	0.733064	-0.447988
841	781	tr|F6XH46|F6XH46_CANLF	N/A	N/A	Glutathione peroxidase OS=Canis lupus familiaris GN=GPX1 PE=3 SV=1	TRUE	2.72072	0.03461	15102.3	1821.64	18912.1	1702.04	9692.28	1169.51	13280.6	8.2905	0.91858	0.12062	-3.05146
842	506	tr|A0A224YNT9|A0A224YNT9_9ACAR	N/A	N/A	Glyoxalase OS=Rhipicephalus zambeziensis PE=4 SV=1	TRUE	-2.7124	0.03499	83699.7	92584.6	81713.8	92836.5	6008.71	2610.6	-8884.89	0.904035	-0.0438148	1.10615	0.14555
843	289	tr|A0A131XPK1|A0A131XPK1_9ACAR	N/A	N/A	Putative actin-binding cytoskeleton protein filamin (Fragment) OS=Hyalomma excavatum PE=2 SV=1	TRUE	-2.70617	0.03529	540205	647726	558605	645737	77637.2	16939.8	-107521	0.834002	-0.0788328	1.19904	0.261877
844	139	tr|A0A224YSP8|A0A224YSP8_9ACAR	N/A	N/A	LIM domain-containing protein OS=Rhipicephalus zambeziensis PE=4 SV=1	TRUE	-2.66121	0.03746	1.27721e+06	2.12034e+06	1.26225e+06	2.41714e+06	50471.3	631633	-843133	0.60236	-0.220144	1.66014	0.731302
845	819	tr|L7M6C2|L7M6C2_9ACAR	N/A	N/A	Uncharacterized protein OS=Rhipicephalus pulchellus PE=2 SV=1	TRUE	-2.65381	0.03784	129168	160431	134064	162658	22719.8	6239.48	-31263.2	0.805131	-0.0941336	1.24203	0.312705
846	806	tr|L7LUV3|L7LUV3_9ACAR	N/A	N/A	Putative actin-related protein arp2/3 complex subunit OS=Rhipicephalus pulchellus PE=2 SV=1	TRUE	-2.64001	0.03854	17818.1	24769.6	17900.2	24884.1	4123.92	3275.23	-6951.55	0.719352	-0.143059	1.39014	0.47523
847	348	tr|F1PH87|F1PH87_CANLF	N/A	N/A	Serpin family A member 3 OS=Canis lupus familiaris GN=SERPINA3 PE=3 SV=2	TRUE	2.58342	0.04158	371461	158671	371987	166448	163667	18727.1	212789	2.34107	0.369414	0.427155	-1.22717
848	743	tr|A0A224Z1M0|A0A224Z1M0_9ACAR	N/A	N/A	Polypyrimidine tract-binding protein 2 OS=Rhipicephalus zambeziensis PE=4 SV=1	TRUE	-2.52625	0.04491	35278.3	38776.4	35553	39083.5	2666.76	747.206	-3498.17	0.909786	-0.0410606	1.09916	0.1364
849	1048	tr|L7M660|L7M660_9ACAR	N/A	N/A	Uncharacterized protein OS=Rhipicephalus pulchellus PE=2 SV=1	TRUE	2.51877	0.04536	18468.6	10455.9	18003.1	13327.4	2314.07	5926.62	8012.65	1.76633	0.247071	0.566147	-0.820752
850	100	tr|L7M8D5|L7M8D5_9ACAR	N/A	N/A	Putative aldehyde dehydrogenase OS=Rhipicephalus pulchellus PE=2 SV=1	TRUE	2.49464	0.04687	2.47361e+06	2.33862e+06	2.46637e+06	2.33727e+06	103753	30784.3	134989	1.05772	0.0243714	0.945428	-0.0809601
851	598	tr|A0A224YS01|A0A224YS01_9ACAR	N/A	N/A	Alpha-B-crystallin OS=Rhipicephalus zambeziensis PE=3 SV=1	TRUE	2.43078	0.05111	14215.6	4421.52	15744.9	4559.27	7611.46	2646.34	9794.08	3.2151	0.507194	0.311033	-1.68486
852	200	tr|Q2XW18|Q2XW18_RHIMP	N/A	N/A	Glutathione peroxidase OS=Rhipicephalus microplus GN=PHGPX PE=3 SV=2	TRUE	2.41871	0.05195	668015	592001	677624	594227	54186.3	31852.2	76013.7	1.1284	0.0524636	0.88621	-0.17428
853	930	tr|L7M503|L7M503_9ACAR	N/A	N/A	Putative sulfotransferase OS=Rhipicephalus pulchellus PE=2 SV=1	TRUE	-2.41855	0.05197	52307.9	58966.8	52018.3	59017.4	5337.18	1354.89	-6658.83	0.887075	-0.0520397	1.1273	0.172872
854	580	tr|A0A224YTH4|A0A224YTH4_9ACAR	N/A	N/A	Microtubule associated complex OS=Rhipicephalus zambeziensis PE=3 SV=1	TRUE	2.39582	0.0536	267337	222261	266694	226619	8539.47	36647.1	45075.9	1.20281	0.0801958	0.831389	-0.266405
855	998	tr|A0A0C9R1K2|A0A0C9R1K2_AMBAM	N/A	N/A	Ubiquitin carboxyl-terminal hydrolase OS=Amblyomma americanum PE=2 SV=1	TRUE	2.38371	0.05449	36380.8	31186.9	35621.5	31067.2	3555.6	2519.6	5193.9	1.16654	0.0668999	0.857235	-0.222237
856	82	tr|L7MI50|L7MI50_9ACAR	N/A	N/A	Putative glycine rich protein (Fragment) OS=Rhipicephalus pulchellus PE=2 SV=1	TRUE	-2.3453	0.05743	314909	489442	322443	461711	70721.2	130961	-174533	0.643404	-0.191516	1.55423	0.636203
857	796	tr|A0A023FU64|A0A023FU64_9ACAR	N/A	N/A	NADH dehydrogenase [ubiquinone] 1 alpha subcomplex subunit 8 OS=Amblyomma parvum PE=2 SV=1	TRUE	-2.33868	0.05795	2357.63	8409.28	2036.94	10214.8	1817.46	4845.65	-6051.65	0.280361	-0.552283	3.56683	1.83464
858	716	tr|L7MHC5|L7MHC5_9ACAR	N/A	N/A	Putative glutamine synthetase (Fragment) OS=Rhipicephalus pulchellus PE=2 SV=1	TRUE	-2.33553	0.0582	141354	192287	141211	192711	42903.2	7852.3	-50933.2	0.735119	-0.133643	1.36032	0.443951
859	439	tr|L7MK00|L7MK00_9ACAR	N/A	N/A	Putative tick serine protease (Fragment) OS=Rhipicephalus pulchellus PE=2 SV=1	TRUE	-2.33431	0.0583	143653	175190	143115	175251	26526	5147.37	-31537.5	0.819982	-0.0861959	1.21954	0.286337
860	471	tr|A0A224YXB4|A0A224YXB4_9ACAR	N/A	N/A	Pantetheine hydrolase OS=Rhipicephalus zambeziensis PE=4 SV=1	TRUE	-2.32877	0.05874	386661	413854	390698	420980	17351.9	15630	-27192.4	0.934295	-0.0295161	1.07033	0.0980504
861	1030	tr|G3MQM7|G3MQM7_9ACAR	N/A	N/A	Uncharacterized protein OS=Amblyomma maculatum PE=2 SV=1	TRUE	-2.31966	0.05948	15855.5	39661.4	14544.9	46843.9	14186.7	14833.2	-23805.9	0.399772	-0.398187	2.50142	1.32275
862	395	tr|L7M8J0|L7M8J0_9ACAR	N/A	N/A	Uncharacterized protein OS=Rhipicephalus pulchellus PE=2 SV=1	TRUE	2.29721	0.06133	232818	183710	243886	188562	26795.4	33315.7	49107.8	1.26731	0.102884	0.789072	-0.341772
863	1040	tr|A0A023G7P8|A0A023G7P8_9ACAR	N/A	N/A	Putative ca2+/calmodulin-dependent protein (Fragment) OS=Amblyomma triste PE=2 SV=1	TRUE	-2.29509	0.06151	33249.7	56824.9	40006.7	57100.8	20493.9	1435.57	-23575.3	0.585125	-0.232752	1.70904	0.773184
864	336	tr|A0A131XL54|A0A131XL54_9ACAR	N/A	N/A	T-complex protein 1 subunit delta OS=Hyalomma excavatum PE=2 SV=1	TRUE	2.29483	0.06154	192863	150129	197115	149194	23605.8	28807.5	42734.1	1.28465	0.108785	0.778422	-0.361375
865	586	tr|A0A1E1X6J1|A0A1E1X6J1_9ACAR	N/A	N/A	Putative titin (Fragment) OS=Amblyomma aureolatum PE=2 SV=1	TRUE	-2.29438	0.06157	43519.3	66859.9	52564.7	66287.7	18833	7698.92	-23340.6	0.650903	-0.186484	1.53633	0.619486
866	791	tr|A0A131XK26|A0A131XK26_9ACAR	N/A	N/A	Putative acetyl-coa carboxylase (Fragment) OS=Hyalomma excavatum PE=2 SV=1	TRUE	-2.2864	0.06225	80443.9	218158	79767.3	273106	5122.92	120354	-137714	0.368742	-0.433278	2.71193	1.43932
867	465	tr|A0A131YH49|A0A131YH49_RHIAP	N/A	N/A	Myosin light chain 6 OS=Rhipicephalus appendiculatus PE=4 SV=1	TRUE	-2.27459	0.06327	275532	389882	279534	434989	23764	97696.2	-114349	0.706708	-0.15076	1.41501	0.500815
868	804	tr|A0A131XL84|A0A131XL84_9ACAR	N/A	N/A	Putative adenosine monophosphate deaminase (Fragment) OS=Hyalomma excavatum PE=2 SV=1	TRUE	2.23696	0.06663	73620.8	54607.4	74938.9	58458.4	12980.9	10976.2	19013.4	1.34818	0.129749	0.741738	-0.431018
869	941	tr|V5IEW9|V5IEW9_IXORI	N/A	N/A	Putative acyl-coa synthetase family member 3 OS=Ixodes ricinus PE=2 SV=1	TRUE	2.21535	0.06864	28489.6	11433.6	33815.7	12050.7	13096.8	8097.47	17055.9	2.49173	0.396501	0.401327	-1.31715
870	701	tr|L7LYD3|L7LYD3_9ACAR	N/A	N/A	cGMP-dependent protein kinase OS=Rhipicephalus pulchellus PE=2 SV=1	TRUE	2.19125	0.07095	200208	163467	199068	171971	11133.1	31631.9	36740.6	1.22476	0.0880502	0.816488	-0.292497
871	398	tr|L7M958|L7M958_9ACAR	N/A	N/A	Putative g protein beta-subunit 13f OS=Rhipicephalus pulchellus PE=2 SV=1	TRUE	-2.16939	0.07312	116394	149379	108180	157229	24622.6	17844.1	-32984.2	0.779191	-0.108356	1.28338	0.359951
872	1055	tr|L7MM45|L7MM45_9ACAR	N/A	N/A	Putative threonine aldolase (Fragment) OS=Rhipicephalus pulchellus PE=2 SV=1	TRUE	2.16885	0.07318	25575.9	13002.7	28866.2	13890.5	10829.2	4142.11	12573.2	1.96697	0.293797	0.508397	-0.975972
873	910	tr|L7M669|L7M669_9ACAR	N/A	N/A	Histone H2A OS=Rhipicephalus pulchellus PE=2 SV=1	TRUE	-2.15324	0.07477	25878	44631.4	33307.5	43818	17292.8	2091.2	-18753.4	0.579816	-0.236709	1.72468	0.786332
874	817	tr|L7LZC5|L7LZC5_9ACAR	N/A	N/A	GMP reductase OS=Rhipicephalus pulchellus PE=2 SV=1	TRUE	-2.134	0.07678	3469.32	7994.67	3378.87	9458.75	1893.91	3794.84	-4525.35	0.433954	-0.362556	2.30439	1.20439
875	972	tr|B7QJ07|B7QJ07_IXOSC	N/A	N/A	Uncharacterized protein OS=Ixodes scapularis GN=8041974 PE=4 SV=1	TRUE	2.07695	0.08308	81593.9	75175	82459.9	75129.7	4331.26	4409.74	6418.9	1.08539	0.0355843	0.921331	-0.118208
876	519	tr|A0A131YNL2|A0A131YNL2_RHIAP	N/A	N/A	Fumarylacetoacetase OS=Rhipicephalus appendiculatus PE=4 SV=1	TRUE	2.0313	0.0885	413195	392770	414199	394243	18643.2	7538.44	20424.3	1.052	0.022016	0.95057	-0.0731357
877	627	tr|A0A131X8H2|A0A131X8H2_9ACAR	N/A	N/A	Peptidylprolyl isomerase OS=Hyalomma excavatum PE=2 SV=1	TRUE	2.01858	0.09008	168771	149535	165259	149986	15311.3	11348.1	19235.3	1.12863	0.0525529	0.886027	-0.174577
878	78	tr|A0A131XQM1|A0A131XQM1_9ACAR	N/A	N/A	Putative myosin alkali light chain protein OS=Hyalomma excavatum PE=2 SV=1	TRUE	-2.00026	0.09239	4284.62	9615.59	3617.58	9031	2329.85	4794.12	-5330.97	0.445591	-0.351063	2.24421	1.16621
879	913	tr|G3MHT9|G3MHT9_9ACAR	N/A	N/A	Uncharacterized protein (Fragment) OS=Amblyomma maculatum PE=2 SV=1	TRUE	1.99679	0.09284	116815	111944	117625	111891	4167.82	2535.14	4870.46	1.04351	0.0184957	0.958306	-0.0614414
880	846	tr|L7MFB1|L7MFB1_9ACAR	N/A	N/A	Putative transcription factor l2 (Fragment) OS=Rhipicephalus pulchellus PE=2 SV=1	TRUE	-1.98238	0.09471	44387.7	46921.8	43985.6	47223.7	1463.7	2096.13	-2534.08	0.945994	-0.0241118	1.05709	0.0800977
881	1052	tr|L7M813|L7M813_9ACAR	N/A	N/A	Putative atp-dependent rna helicase ddx19a OS=Rhipicephalus pulchellus PE=2 SV=1	TRUE	-1.97882	0.09518	50614.9	73308.1	56382.9	72202.1	22101.4	6130.91	-22693.2	0.690441	-0.160873	1.44835	0.53441
882	1069	tr|A0A131Z3F1|A0A131Z3F1_RHIAP	N/A	N/A	Smoothelin OS=Rhipicephalus appendiculatus PE=4 SV=1	TRUE	-1.96339	0.09724	57415.3	61713.9	57232.5	61668.8	2935.85	3248.67	-4298.56	0.930347	-0.0313551	1.07487	0.104159
883	661	tr|C9W1Q2|C9W1Q2_RHISA	N/A	N/A	Protein disulfide isomerase OS=Rhipicephalus sanguineus PE=2 SV=1	TRUE	1.95982	0.09772	162595	132685	163199	133694	29129.7	9120.38	29910.8	1.22543	0.0882877	0.816042	-0.293285
884	552	tr|L7M4S5|L7M4S5_9ACAR	N/A	N/A	Proteasome subunit alpha type OS=Rhipicephalus pulchellus PE=2 SV=1	TRUE	1.94708	0.09946	422827	353484	425656	383279	10718.9	70416.4	69342.8	1.19617	0.0777927	0.836002	-0.258422
885	884	tr|A0A131Z560|A0A131Z560_RHIAP	N/A	N/A	Enolase OS=Rhipicephalus appendiculatus PE=3 SV=1	TRUE	1.94245	0.1001	533069	513504	535347	510306	18506.4	7956.25	19564.6	1.0381	0.0162393	0.963298	-0.0539456
886	68	tr|A0A131YP26|A0A131YP26_RHIAP	N/A	N/A	Chorion peroxidase like protein OS=Rhipicephalus appendiculatus PE=4 SV=1	TRUE	-1.93853	0.10065	107293	126938	113402	127808	19709.1	4725.89	-19644.8	0.84524	-0.0730198	1.1831	0.242567
887	257	tr|L7MAX7|L7MAX7_9ACAR	N/A	N/A	Putative eukaryotic translation initiation factor 4a2 OS=Rhipicephalus pulchellus PE=2 SV=1	TRUE	1.93695	0.10087	565768	516126	563886	520554	48903.7	15355.6	49641.9	1.09618	0.0398825	0.912258	-0.132487
888	450	tr|A0A1E1XNF6|A0A1E1XNF6_9ACAR	N/A	N/A	Putative quinolinate phosphoribosyl transferase (Fragment) OS=Amblyomma sculptum PE=2 SV=1	TRUE	-1.92555	0.10247	319628	337852	319804	339831	7774.77	17257.9	-18223.8	0.94606	-0.0240814	1.05702	0.0799967
889	243	tr|A0A131YL25|A0A131YL25_RHIAP	N/A	N/A	Methylenetetrahydrofolate dehydrogenase (NADP+) / methenyltetrahydrofolate cyclohydrolase OS=Rhipicephalus appendiculatus PE=3 SV=1	TRUE	1.91743	0.10364	329077	294759	328420	280531	2678.55	35695.8	34318.2	1.11643	0.0478308	0.895714	-0.15889
890	52	tr|A0A224Z2V2|A0A224Z2V2_9ACAR	N/A	N/A	Pyruvate carboxylase OS=Rhipicephalus zambeziensis PE=4 SV=1	TRUE	-1.905	0.10544	73941.4	96000.2	82621.5	95852.7	22050.9	7077.82	-22058.9	0.770221	-0.113385	1.29833	0.376656
891	497	tr|A0A224Z2L8|A0A224Z2L8_9ACAR	N/A	N/A	Myosin regulatory light chain 12 OS=Rhipicephalus zambeziensis PE=4 SV=1	TRUE	-1.90009	0.10616	168602	179015	169944	178779	3767.43	10292.4	-10412.8	0.941833	-0.0260261	1.06176	0.0864569
892	492	tr|A0A224Z9F0|A0A224Z9F0_9ACAR	N/A	N/A	Superoxide dismutase [Cu-Zn] OS=Rhipicephalus zambeziensis PE=3 SV=1	TRUE	1.89745	0.10655	422451	350179	422263	320349	16931.9	74273	72272.5	1.20639	0.0814868	0.828921	-0.270693
893	222	tr|A0A131Z614|A0A131Z614_RHIAP	N/A	N/A	ATP synthase subunit alpha OS=Rhipicephalus appendiculatus PE=3 SV=1	TRUE	-1.88	0.10916	217255	225952	216306	227236	8385.83	3909.42	-8697.18	0.961509	-0.0170468	1.04003	0.0566282
894	1007	tr|A0A224Z2P5|A0A224Z2P5_9ACAR	N/A	N/A	N-acylaminoacyl peptide hydrolase OS=Rhipicephalus zambeziensis PE=4 SV=1	TRUE	-1.84476	0.11462	84008.6	99525.7	84222.8	105704	5544.41	15882.9	-15517.1	0.84409	-0.0736113	1.18471	0.244532
895	554	tr|L7M8U6|L7M8U6_9ACAR	N/A	N/A	Putative actin OS=Rhipicephalus pulchellus PE=2 SV=1	TRUE	1.84276	0.11494	220290	198600	216450	198572	15482.4	17733.4	21690.1	1.10921	0.0450157	0.901539	-0.149539
896	772	tr|A0A224YCT6|A0A224YCT6_9ACAR	N/A	N/A	Metastriate one of each protein family OS=Rhipicephalus zambeziensis PE=4 SV=1	TRUE	-1.82939	0.11709	1.73684e+06	1.79864e+06	1.7515e+06	1.80552e+06	49326.5	46178.5	-61804.9	0.965638	-0.0151856	1.03558	0.0504456
897	633	tr|A0A131ZAT8|A0A131ZAT8_RHIAP	N/A	N/A	Laminin, gamma 1 (Fragment) OS=Rhipicephalus appendiculatus PE=4 SV=1	TRUE	1.81003	0.12027	52122.6	31686.2	52000.1	25046.4	5999.04	21769.9	20436.4	1.64496	0.216156	0.607916	-0.718056
898	1014	tr|L7MEY7|L7MEY7_9ACAR	N/A	N/A	Uncharacterized protein (Fragment) OS=Rhipicephalus pulchellus PE=2 SV=1	TRUE	1.78978	0.12369	63767.7	40533	63258.3	52678.7	1638.57	25912	23234.8	1.57323	0.196793	0.635634	-0.653731
899	933	tr|G3MN31|G3MN31_9ACAR	N/A	N/A	Uncharacterized protein OS=Amblyomma maculatum PE=2 SV=1	TRUE	-1.78022	0.12534	129911	136676	129287	136260	5526.87	5217.06	-6765.07	0.950503	-0.0220465	1.05207	0.073237
900	698	tr|L7M6T7|L7M6T7_9ACAR	N/A	N/A	Putative sorting nexin 3 OS=Rhipicephalus pulchellus PE=2 SV=1	TRUE	-1.77796	0.12573	173779	187716	181132	187650	15542.9	2050.14	-13937	0.925755	-0.0335041	1.0802	0.111298
901	592	tr|A0A224YI66|A0A224YI66_9ACAR	N/A	N/A	Proteasome subunit beta OS=Rhipicephalus zambeziensis PE=3 SV=1	TRUE	-1.77739	0.12583	352709	453976	314355	479952	87567.5	72915.5	-101267	0.776932	-0.109617	1.28711	0.364139
902	496	tr|A0A131XS02|A0A131XS02_9ACAR	N/A	N/A	Succinate--CoA ligase [ADP/GDP-forming] subunit alpha, mitochondrial OS=Hyalomma excavatum PE=2 SV=1	TRUE	-1.76386	0.12821	307526	333410	309780	341736	6999.59	28503.3	-25884.8	0.922364	-0.0350978	1.08417	0.116592
903	881	tr|A0A1E1X3B2|A0A1E1X3B2_9ACAR	N/A	N/A	Putative wd40 repeat stress protein/actin OS=Amblyomma aureolatum PE=2 SV=1	TRUE	-1.75465	0.12985	45125.9	49024	46240.8	50271.4	3261.3	3017.69	-3898.18	0.920484	-0.0359836	1.08638	0.119535
904	328	tr|A0A224YJ66|A0A224YJ66_9ACAR	N/A	N/A	Carbonyl reductase 1 OS=Rhipicephalus zambeziensis PE=3 SV=1	TRUE	1.74301	0.13196	338033	284155	349739	276482	53633.2	30747.3	53877.9	1.18961	0.0754036	0.840614	-0.250485
905	87	tr|A0A131YDT0|A0A131YDT0_RHIAP	N/A	N/A	Cofilin OS=Rhipicephalus appendiculatus PE=3 SV=1	TRUE	1.742	0.13214	973233	937935	966574	946690	19124.5	35729.4	35297.9	1.03763	0.0160441	0.963731	-0.0532972
906	738	tr|A0A131XLZ2|A0A131XLZ2_9ACAR	N/A	N/A	Putative phosphoglucomutase (Fragment) OS=Hyalomma excavatum PE=2 SV=1	TRUE	1.73208	0.13397	98294.9	42526.6	97811.4	16134.8	2134.66	64359.1	55768.3	2.31137	0.36387	0.432643	-1.20875
907	179	tr|L7MHZ3|L7MHZ3_9ACAR	N/A	N/A	Putative influenza virus ns1a-binding protein (Fragment) OS=Rhipicephalus pulchellus PE=2 SV=1	TRUE	-1.70259	0.13954	375134	394905	374360	395411	18034.1	14633.6	-19770.9	0.949935	-0.0223061	1.0527	0.0740991
908	784	tr|A0A131Y4H0|A0A131Y4H0_IXORI	N/A	N/A	Glucosamine-6-phosphate isomerase OS=Ixodes ricinus PE=2 SV=1	TRUE	1.63866	0.1524	77587.3	72639.3	78448.5	71889.6	4241.28	4298.99	4947.94	1.06812	0.0286186	0.936227	-0.095069
909	423	tr|A0A131XL63|A0A131XL63_9ACAR	N/A	N/A	Putative 3-oxoacyl coa thiolase (Fragment) OS=Hyalomma excavatum PE=2 SV=1	TRUE	-1.63707	0.15273	64118.3	79553.9	66659.3	83540.6	14866.2	11602	-15435.6	0.805973	-0.0936797	1.24074	0.311197
910	984	tr|A0A224YEP2|A0A224YEP2_9ACAR	N/A	N/A	Secreted proline-rich protein OS=Rhipicephalus zambeziensis PE=4 SV=1	TRUE	-1.6361	0.15294	4091.92	24840.9	4042.61	25453.1	903.219	25347.9	-20749	0.164725	-0.78324	6.07072	2.60187
911	773	tr|A0A131XDJ4|A0A131XDJ4_9ACAR	N/A	N/A	Putative prohibitins and stomatins of the pid superfamily protein OS=Hyalomma excavatum PE=2 SV=1	TRUE	-1.62853	0.15454	10392.8	23319.2	11740.7	27700.2	7788.41	13833.1	-12926.4	0.445675	-0.350982	2.24379	1.16594
912	820	tr|L7M602|L7M602_9ACAR	N/A	N/A	Putative 26s proteasome regulatory complex subunit rpn2/psmd1 OS=Rhipicephalus pulchellus PE=2 SV=1	TRUE	1.62806	0.15464	68487	64694.1	69886	65887.1	3648.19	2898.47	3792.94	1.05863	0.0247437	0.944618	-0.0821968
913	968	tr|C9W1E6|C9W1E6_RHISA	N/A	N/A	Putative cement protein OS=Rhipicephalus sanguineus PE=2 SV=1	TRUE	-1.58793	0.1634	9209.23	59896.5	8782.71	50841.8	2508.99	63791.3	-50687.3	0.153752	-0.813178	6.50396	2.70132
914	384	tr|L7MAW2|L7MAW2_9ACAR	N/A	N/A	Uncharacterized protein OS=Rhipicephalus pulchellus PE=2 SV=1	TRUE	-1.56989	0.16749	29432	47912.6	33058.8	51752.9	21187.7	10266.3	-18480.7	0.614284	-0.211631	1.62791	0.703022
915	215	tr|L7M7R5|L7M7R5_9ACAR	N/A	N/A	Putative cathepsin d isoform 1 protein OS=Rhipicephalus pulchellus PE=2 SV=1	TRUE	1.56094	0.16956	985393	925204	998330	922204	73098.1	24573.7	60188.4	1.06505	0.0273717	0.938919	-0.0909268
916	507	tr|L7M3G9|L7M3G9_9ACAR	N/A	N/A	Putative small nuclear ribonucleoprotein d2 polypeptide OS=Rhipicephalus pulchellus PE=2 SV=1	TRUE	-1.53179	0.17646	187860	218865	195198	227896	19662.3	35386.5	-31005.2	0.858336	-0.0663426	1.16504	0.220385
917	864	tr|L7LZ11|L7LZ11_9ACAR	N/A	N/A	Putative vacuolar h +-atpase 26kd e subunit OS=Rhipicephalus pulchellus PE=2 SV=1	TRUE	-1.53149	0.17653	26991.8	32723.7	26651.4	34482	5898.65	4608.26	-5731.85	0.824841	-0.0836297	1.21235	0.277812
918	195	tr|G3MM77|G3MM77_9ACAR	N/A	N/A	Uncharacterized protein OS=Amblyomma maculatum PE=2 SV=1	TRUE	-1.52389	0.17837	279295	296735	280289	299791	19053.6	12680.6	-17439.1	0.94123	-0.0263042	1.06244	0.0873806
919	155	tr|L7M5J9|L7M5J9_9ACAR	N/A	N/A	Putative electron transfer flavoprotein alpha subunit OS=Rhipicephalus pulchellus PE=2 SV=1	TRUE	-1.47987	0.1894	871922	906832	865245	901859	41275.7	22850.9	-34909.4	0.961504	-0.0170489	1.04004	0.0566353
920	525	tr|A0A131XGT2|A0A131XGT2_9ACAR	N/A	N/A	Putative heat shock-related protein OS=Hyalomma excavatum PE=2 SV=1	TRUE	1.47813	0.18985	77199.1	49376.7	86484.8	50102	37525.6	3002.77	27822.5	1.56347	0.194091	0.639601	-0.644755
921	1066	tr|A0A131YWE2|A0A131YWE2_RHIAP	N/A	N/A	Uncharacterized protein OS=Rhipicephalus appendiculatus PE=4 SV=1	TRUE	-1.46454	0.19339	15302.9	19995.5	14526.5	20646.9	5037.01	3961.87	-4692.69	0.765313	-0.116161	1.30665	0.385878
922	32	tr|A0A224YVU2|A0A224YVU2_9ACAR	N/A	N/A	Elongation factor 2-like OS=Rhipicephalus zambeziensis PE=4 SV=1	TRUE	-1.46055	0.19444	1.14764e+06	1.21209e+06	1.16291e+06	1.20767e+06	42904.4	77129.3	-64453.8	0.946824	-0.0237306	1.05616	0.0788314
923	1054	tr|A0A224Z4M6|A0A224Z4M6_9ACAR	N/A	N/A	Moesin/ezrin/radixin protein 1 OS=Rhipicephalus zambeziensis PE=4 SV=1	TRUE	-1.4558	0.1957	46764.7	69446.4	60510.5	69306.8	30778.2	4866.41	-22681.7	0.673393	-0.171731	1.48502	0.57048
924	962	tr|J9NYR7|J9NYR7_CANLF	N/A	N/A	Uncharacterized protein OS=Canis lupus familiaris PE=4 SV=1	TRUE	1.45346	0.19632	323680	63734.1	326014	73781.4	355613	38516.1	259946	5.0786	0.705744	0.196905	-2.34443
925	413	tr|L7LRY7|L7LRY7_9ACAR	N/A	N/A	Putative tick salivary serpin OS=Rhipicephalus pulchellus PE=2 SV=1	TRUE	1.45078	0.19703	184086	144867	191211	130252	39768.1	36628.2	39219	1.27072	0.104051	0.786953	-0.345651
926	210	tr|A0A131YYZ5|A0A131YYZ5_RHIAP	N/A	N/A	Adenylyl cyclase-associated protein OS=Rhipicephalus appendiculatus PE=3 SV=1	TRUE	-1.45008	0.19722	150168	162185	149901	161023	10273.7	13005.8	-12016.8	0.925907	-0.0334328	1.08002	0.111062
927	189	tr|A0A224YV05|A0A224YV05_9ACAR	N/A	N/A	Calmodulin OS=Rhipicephalus zambeziensis PE=4 SV=1	TRUE	1.43799	0.20048	1.26825e+06	1.1857e+06	1.25808e+06	1.14611e+06	66786.2	93381.5	82545.2	1.06962	0.0292284	0.934914	-0.0970946
928	953	tr|L7M2Z7|L7M2Z7_9ACAR	N/A	N/A	Putative rna-binding protein OS=Rhipicephalus pulchellus PE=2 SV=1	TRUE	1.42546	0.20391	17759.6	13121	18015.7	11238.4	2152.41	6141.97	4638.59	1.35353	0.131466	0.738811	-0.436722
929	858	tr|A0A131XQF1|A0A131XQF1_9ACAR	N/A	N/A	Putative electron transfer flavoprotein ubiquinone oxidoreductase (Fragment) OS=Hyalomma excavatum PE=2 SV=1	TRUE	-1.42489	0.20407	13416.7	31099.1	10208.8	39402.1	14799.6	19924.2	-17682.4	0.431418	-0.365102	2.31794	1.21284
930	575	tr|A0A131XCP0|A0A131XCP0_9ACAR	N/A	N/A	Putative ornithine aminotransferase OS=Hyalomma excavatum PE=2 SV=1	TRUE	1.42202	0.20486	101229	91122.4	105363	90561.1	13176.6	5331.64	10106.6	1.11091	0.0456797	0.900161	-0.151745
931	1011	tr|L7M911|L7M911_9ACAR	N/A	N/A	Putative zn2+-binding dehydrogenase nuclear receptor binding factor-1 OS=Rhipicephalus pulchellus PE=2 SV=1	TRUE	-1.39093	0.21364	58453.1	66959.5	58584	70241.1	2645.88	11941.7	-8506.43	0.872962	-0.0590049	1.14553	0.19601
932	191	tr|L7M7P8|L7M7P8_9ACAR	N/A	N/A	Proteasome subunit alpha type OS=Rhipicephalus pulchellus PE=2 SV=1	TRUE	1.38003	0.2168	800936	748207	807778	757893	57317.3	50541	52729.3	1.07047	0.0295762	0.934165	-0.09825
933	1013	tr|L7M4T9|L7M4T9_9ACAR	N/A	N/A	Putative rab-protein 10 OS=Rhipicephalus pulchellus PE=2 SV=1	TRUE	-1.37846	0.21725	20660.4	29441.5	23068.1	28191.3	12362.6	3080.03	-8781.09	0.701744	-0.153821	1.42502	0.510982
934	805	tr|L7M815|L7M815_9ACAR	N/A	N/A	Putative hydroxyacylglutathione hydrolase mitochondrial OS=Rhipicephalus pulchellus PE=2 SV=1	TRUE	1.37421	0.2185	26699.7	17283.1	28410.8	17201.7	13451.9	2620.5	9416.61	1.54485	0.188885	0.647314	-0.627463
935	762	tr|L7LZW6|L7LZW6_9ACAR	N/A	N/A	Putative adp-ribosylglycohydrolase posttranslational modification OS=Rhipicephalus pulchellus PE=2 SV=1	TRUE	-1.35724	0.22354	31091.3	43631.5	32242.7	42275.1	17797.8	4971.08	-12540.2	0.712588	-0.147162	1.40334	0.48886
936	894	tr|J9PAW5|J9PAW5_CANLF	N/A	N/A	Uncharacterized protein OS=Canis lupus familiaris PE=4 SV=1	TRUE	1.35203	0.2251	75308.9	16289.1	43148.1	16730.2	87075.3	6335.09	59019.8	4.62326	0.664948	0.216298	-2.20891
937	156	tr|L7MGN6|L7MGN6_9ACAR	N/A	N/A	Putative tomosyn (Fragment) OS=Rhipicephalus pulchellus PE=2 SV=1	TRUE	-1.32032	0.23486	534843	576069	535817	552870	20196.8	59092.4	-41226.1	0.928435	-0.0322483	1.07708	0.107127
938	458	tr|A0A224YG33|A0A224YG33_9ACAR	N/A	N/A	Proteasome subunit beta type OS=Rhipicephalus zambeziensis PE=3 SV=1	TRUE	1.31129	0.2377	232239	219822	230833	218620	13379.2	13404.8	12417.4	1.05649	0.0238647	0.946532	-0.0792769
939	119	tr|L7M4Z0|L7M4Z0_9ACAR	N/A	N/A	Putative phosphoenolpyruvate carboxykinase OS=Rhipicephalus pulchellus PE=2 SV=1	TRUE	-1.29923	0.24155	600232	654926	594762	689320	19737	81848	-54693.8	0.916489	-0.0378729	1.09112	0.125811
940	308	tr|A0A224YPE0|A0A224YPE0_9ACAR	N/A	N/A	Heat shock protein 90kDa beta OS=Rhipicephalus zambeziensis PE=3 SV=1	TRUE	-1.29804	0.24194	330123	423752	303219	463067	115977	85796.4	-93629	0.779048	-0.108436	1.28362	0.360216
941	963	tr|G3MT47|G3MT47_9ACAR	N/A	N/A	Uncharacterized protein OS=Amblyomma maculatum PE=2 SV=1	TRUE	1.29583	0.24265	46261	32345.4	47381.1	41118	6304.74	20531.3	13915.6	1.43022	0.155403	0.699194	-0.516236
942	771	tr|L7MAY3|L7MAY3_9ACAR	N/A	N/A	Obg-like ATPase 1 OS=Rhipicephalus pulchellus PE=2 SV=1	TRUE	1.28565	0.24595	14827.6	11903.1	15016.7	12957.6	1562.6	4272.71	2924.53	1.24569	0.0954116	0.802765	-0.31695
943	294	tr|L7MLF4|L7MLF4_9ACAR	N/A	N/A	Putative 97 kDa heat shock protein (Fragment) OS=Rhipicephalus pulchellus PE=2 SV=1	TRUE	-1.27381	0.24985	370555	393838	367200	392395	34063.1	13268.5	-23282.7	0.940882	-0.0264646	1.06283	0.0879136
944	524	tr|L7M5Q1|L7M5Q1_9ACAR	N/A	N/A	Putative e3 ubiquitin ligase OS=Rhipicephalus pulchellus PE=2 SV=1	TRUE	-1.2717	0.25055	85163.9	92316.8	83086	91763.4	10229.3	4680.75	-7152.93	0.922518	-0.0350254	1.08399	0.116352
945	1022	tr|A0A131XM70|A0A131XM70_9ACAR	N/A	N/A	Putative heat shock-related protein OS=Hyalomma excavatum PE=2 SV=1	TRUE	-1.249	0.25818	361701	379742	361005	374737	23277.6	17108.3	-18040.9	0.952492	-0.0211388	1.04988	0.0702216
946	489	tr|K7X6U2|K7X6U2_9ACAR	N/A	N/A	Serpin 2 OS=Rhipicephalus haemaphysaloides PE=2 SV=1	TRUE	1.23654	0.26246	117143	107093	112334	108147	15525.8	4813.72	10049.9	1.09384	0.0389549	0.914208	-0.129405
947	546	tr|Q9U6M9|Q9U6M9_RHIMP	N/A	N/A	Esterase OS=Rhipicephalus microplus PE=2 SV=1	TRUE	1.23179	0.26411	184614	171148	178070	174001	17139.3	13575	13466	1.07868	0.0328928	0.927059	-0.109267
948	815	tr|L7M591|L7M591_9ACAR	N/A	N/A	Putative endocytosis/signaling protein ehd1 OS=Rhipicephalus pulchellus PE=2 SV=1	TRUE	-1.21507	0.26998	46964.1	50841.9	46286.7	51117.9	6255.48	1268.62	-3877.77	0.923729	-0.0344555	1.08257	0.114459
949	28	tr|L7M6W4|L7M6W4_9ACAR	N/A	N/A	Putative 60 kDa heat shock protein OS=Rhipicephalus pulchellus PE=2 SV=1	TRUE	1.20588	0.27325	182275	163013	192453	165731	30836.6	8350.89	19262.3	1.11816	0.0485056	0.894323	-0.161132
950	656	tr|A0A131XIS4|A0A131XIS4_9ACAR	N/A	N/A	Putative flavonol reductase/cinnamoyl-coa reductase OS=Hyalomma excavatum PE=2 SV=1	TRUE	-1.19723	0.27637	118454	157190	131769	155667	63818.5	10697.3	-38735.8	0.753574	-0.122874	1.32701	0.40818
951	184	tr|A0A224Z0I5|A0A224Z0I5_9ACAR	N/A	N/A	T-complex protein 1 subunit theta OS=Rhipicephalus zambeziensis PE=3 SV=1	TRUE	-1.18045	0.28249	360830	380913	357282	386678	29282.3	17331.9	-20083.7	0.947275	-0.023524	1.05566	0.078145
952	163	tr|A0A131XE97|A0A131XE97_9ACAR	N/A	N/A	Glycerol-3-phosphate dehydrogenase [NAD(+)] OS=Hyalomma excavatum PE=2 SV=1	TRUE	-1.16642	0.28771	128666	147521	131012	147210	28612.9	15053.3	-18855.8	0.872183	-0.0593925	1.14655	0.197298
953	849	tr|A0A034WXL7|A0A034WXL7_RHIMP	N/A	N/A	Glutathione peroxidase (Fragment) OS=Rhipicephalus microplus PE=3 SV=1	TRUE	-1.15632	0.29151	74938.9	102056	68989.9	103833	45893.2	9680.24	-27117.4	0.73429	-0.134132	1.36186	0.445578
954	424	tr|A0A131XHH8|A0A131XHH8_9ACAR	N/A	N/A	Phosphoserine aminotransferase OS=Hyalomma excavatum PE=2 SV=1	TRUE	-1.15368	0.29251	242324	264150	244058	269482	35365	13452.2	-21826	0.917373	-0.0374541	1.09007	0.12442
955	702	tr|L7MI07|L7MI07_9ACAR	N/A	N/A	Putative monotil peptide (Fragment) OS=Rhipicephalus pulchellus PE=2 SV=1	TRUE	1.14449	0.29602	50383	43740.6	50216.5	47334.3	1461.94	11515.2	6642.37	1.15186	0.0613991	0.868162	-0.203963
956	632	tr|B7SP35|B7SP35_DERVA	N/A	N/A	Putative serine protease protein (Fragment) OS=Dermacentor variabilis PE=2 SV=1	TRUE	1.13745	0.29873	47157.2	43575.9	47963.7	42970.2	3560.04	5193.97	3581.21	1.08218	0.0343008	0.924058	-0.113945
957	1051	tr|A0A224YPI2|A0A224YPI2_9ACAR	N/A	N/A	Phospholipase A2 OS=Rhipicephalus zambeziensis PE=4 SV=1	TRUE	1.10743	0.31052	43380.7	29198.4	51259.9	28650.1	25256.2	4259.22	14182.2	1.48572	0.171936	0.673075	-0.57116
958	664	tr|L7LXM0|L7LXM0_9ACAR	N/A	N/A	Uncharacterized protein OS=Rhipicephalus pulchellus PE=2 SV=1	TRUE	-1.09244	0.31655	26334.6	33610.4	28245.3	32595.1	12531.4	4515.46	-7275.75	0.783527	-0.105946	1.27628	0.351946
959	974	tr|B7P4Q3|B7P4Q3_IXOSC	N/A	N/A	Uncharacterized protein OS=Ixodes scapularis GN=8024594 PE=4 SV=1	TRUE	1.0889	0.31799	29033.9	16789.4	28645.7	10758.9	17064.6	14648.8	12244.5	1.7293	0.23787	0.578269	-0.790188
960	123	tr|L7MEG0|L7MEG0_9ACAR	N/A	N/A	Putative heat shock protein (Fragment) OS=Rhipicephalus pulchellus PE=2 SV=1	TRUE	1.07624	0.32318	64514.2	44986.2	49805.5	43269.7	34468.9	11349.5	19528	1.43409	0.156576	0.697307	-0.520135
961	342	tr|B3GV23|B3GV23_RHIMP	N/A	N/A	Succinate-semialdehyde dehydrogenase OS=Rhipicephalus microplus GN=ssadh PE=2 SV=1	TRUE	-1.07617	0.32321	94637.6	121366	73332.9	120365	49244.4	6512.28	-26728.4	0.779771	-0.108033	1.28243	0.358878
962	959	tr|L7LR19|L7LR19_9ACAR	N/A	N/A	Putative microplusin-like antibacteral peptide OS=Rhipicephalus pulchellus PE=2 SV=1	TRUE	-1.07373	0.32422	29982	47609.6	37620.8	59432.1	18829.5	26898.8	-17627.6	0.629748	-0.200834	1.58794	0.667155
963	549	tr|A0A131YR95|A0A131YR95_RHIAP	N/A	N/A	Amidase OS=Rhipicephalus appendiculatus PE=4 SV=1	TRUE	1.07335	0.32437	38353.1	33999.6	39543.4	33667.5	6871.87	4310.35	4353.42	1.12804	0.0523257	0.886491	-0.173822
964	797	tr|A0A224YHG1|A0A224YHG1_9ACAR	N/A	N/A	Aminomethyltransferase OS=Rhipicephalus zambeziensis PE=3 SV=1	TRUE	-1.05634	0.33148	30444.2	32569.2	30915.2	32335.4	3368.51	2199.96	-2124.96	0.934756	-0.029302	1.0698	0.097339
965	566	tr|B5ABL8|B5ABL8_DERVA	N/A	N/A	Hemelipoglycoprotein 2 (Fragment) OS=Dermacentor variabilis PE=2 SV=1	TRUE	-1.04782	0.33508	1.14501e+06	1.19189e+06	1.1674e+06	1.19215e+06	87068.9	20672.7	-46884.5	0.960664	-0.0174286	1.04095	0.0578964
966	1073	tr|A0A023GJ32|A0A023GJ32_9ACAR	N/A	N/A	Ribosomal protein L19 OS=Amblyomma triste PE=2 SV=1	TRUE	-1.03191	0.3419	49237.3	73620.6	48752.6	96346.9	2534.17	47190.7	-24383.4	0.668797	-0.174705	1.49522	0.580359
967	227	tr|L7MKN4|L7MKN4_9ACAR	N/A	N/A	Putative hydroxysteroid dehydrogenase-like protein 2 (Fragment) OS=Rhipicephalus pulchellus PE=2 SV=1	TRUE	1.02909	0.34312	353513	329314	375656	329875	46764.8	4978.15	24198.6	1.07348	0.0307947	0.931548	-0.102298
968	751	tr|L7M4J4|L7M4J4_9ACAR	N/A	N/A	Putative histone macroh2a1.1 strongylocentrotus purpuratus: similar to histone OS=Rhipicephalus pulchellus PE=2 SV=1	TRUE	-1.02834	0.34345	145034	183441	144839	170355	6424.86	74421.8	-38407.8	0.790627	-0.102029	1.26482	0.338932
969	231	tr|V5HJX3|V5HJX3_IXORI	N/A	N/A	Histone H2A OS=Ixodes ricinus PE=2 SV=1	TRUE	0.99832	0.35667	899677	860933	900263	872198	54970.4	54798.4	38744	1.045	0.0191173	0.956936	-0.0635061
970	265	tr|L7MDB3|L7MDB3_9ACAR	N/A	N/A	Malate dehydrogenase (Fragment) OS=Rhipicephalus pulchellus PE=2 SV=1	TRUE	0.994867	0.35821	828571	818131	826766	818477	15531.7	14116.3	10440.2	1.01276	0.00550699	0.9874	-0.0182938
971	476	tr|A0A1E1X3J5|A0A1E1X3J5_9ACAR	N/A	N/A	Putative cystein protease calpain-b (Fragment) OS=Amblyomma aureolatum PE=2 SV=1	TRUE	-0.973726	0.3678	117575	135498	116656	151833	9983.88	35434.2	-17923.3	0.867723	-0.061619	1.15244	0.204694
972	197	tr|A0A1E1X4T0|A0A1E1X4T0_9ACAR	N/A	N/A	Putative ribose-phosphate pyrophosphokinase (Fragment) OS=Amblyomma aureolatum PE=2 SV=1	TRUE	-0.972203	0.3685	627775	636694	626241	639840	11430.1	14351.5	-8918.49	0.985992	-0.00612639	1.01421	0.0203514
973	752	tr|L7MBE6|L7MBE6_9ACAR	N/A	N/A	Uncharacterized protein OS=Rhipicephalus pulchellus PE=2 SV=1	TRUE	-0.971303	0.36891	57627.1	76149.6	57374.5	76368.7	34507	16244.5	-18522.5	0.756762	-0.121041	1.32142	0.402089
974	420	tr|A0A131XP13|A0A131XP13_9ACAR	N/A	N/A	Proteasome subunit beta type (Fragment) OS=Hyalomma excavatum PE=2 SV=1	TRUE	0.95599	0.37599	501738	413621	509715	497786	28408.2	182144	88116.8	1.21304	0.0838742	0.824377	-0.278624
975	322	tr|G3MP49|G3MP49_9ACAR	N/A	N/A	Uncharacterized protein OS=Amblyomma maculatum PE=2 SV=1	TRUE	-0.946901	0.38025	145330	172883	144297	191354	10556.5	57230.8	-27553	0.840626	-0.0753972	1.18959	0.250464
976	1009	tr|L7MB37|L7MB37_9ACAR	N/A	N/A	Putative actin OS=Rhipicephalus pulchellus PE=2 SV=1	TRUE	0.945834	0.38075	133663	120481	133824	130729	2729.79	27739.4	13181.8	1.10941	0.0450921	0.90138	-0.149793
977	827	tr|L7M7F9|L7M7F9_9ACAR	N/A	N/A	Putative integrin-linked kinase OS=Rhipicephalus pulchellus PE=2 SV=1	TRUE	-0.944896	0.38119	49935	64838.1	63905.2	65066.5	31536.5	700.337	-14903	0.77015	-0.113425	1.29845	0.376788
978	447	tr|A0A224YM81|A0A224YM81_9ACAR	N/A	N/A	Elongation factor 1-delta OS=Rhipicephalus zambeziensis PE=3 SV=1	TRUE	-0.931159	0.3877	145195	149371	144605	149742	7122.6	5452.68	-4176.3	0.972041	-0.0123155	1.02876	0.0409113
979	399	tr|L7M7V3|L7M7V3_9ACAR	N/A	N/A	GTP-binding nuclear protein OS=Rhipicephalus pulchellus PE=2 SV=1	TRUE	-0.928589	0.38893	215914	262803	195048	233752	45101.1	90359.1	-46888.8	0.821582	-0.0853492	1.21716	0.283524
980	559	tr|A0A131YHI8|A0A131YHI8_RHIAP	N/A	N/A	Dihydrodiol dehydrogenase / D-xylose 1-dehydrogenase (NADP) OS=Rhipicephalus appendiculatus PE=4 SV=1	TRUE	0.919981	0.39307	57263.7	50022.5	61275	47913.5	9001.96	12914.2	7241.17	1.14476	0.0587138	0.873547	-0.195043
981	713	tr|V9VMN6|V9VMN6_RHIMP	N/A	N/A	Serine protease inhibitor 13 RmS13 OS=Rhipicephalus microplus GN=RmS-13 PE=2 SV=1	TRUE	0.91856	0.39375	38830.9	29490.6	39264.8	29384.6	6017.36	19426.4	9340.38	1.31672	0.119495	0.75946	-0.396953
982	582	tr|A0A131YWL7|A0A131YWL7_RHIAP	N/A	N/A	Putative 2-oxoglutarate dehydrogenase E1 component DHKTD1 OS=Rhipicephalus appendiculatus PE=4 SV=1	TRUE	-0.914393	0.39577	87023.9	90366.9	86023.2	91703.1	3237.05	6556.49	-3343.04	0.963006	-0.016371	1.03842	0.0543834
983	44	tr|L7M073|L7M073_9ACAR	N/A	N/A	Putative heteroproteinous nuclear ribonucleoprotein r rrm superfamily OS=Rhipicephalus pulchellus PE=2 SV=1	TRUE	-0.907176	0.39928	1.48858e+06	1.5307e+06	1.49438e+06	1.53649e+06	83661.1	40314.7	-42123.8	0.972481	-0.012119	1.0283	0.0402584
984	657	tr|L7MF28|L7MF28_9ACAR	N/A	N/A	Putative a2iv collagen (Fragment) OS=Rhipicephalus pulchellus PE=2 SV=1	TRUE	-0.905125	0.40028	154787	231761	155759	239354	142543	92790	-76973.7	0.667874	-0.175305	1.49729	0.582351
985	854	tr|A0A224Z5I7|A0A224Z5I7_9ACAR	N/A	N/A	Peptidyl-prolyl cis-trans isomerase OS=Rhipicephalus zambeziensis PE=4 SV=1	TRUE	0.896365	0.40458	47167.3	45643.6	46681.2	46680.8	1272.93	3152.4	1523.69	1.03338	0.014261	0.967696	-0.047374
986	956	tr|L7LZG6|L7LZG6_9ACAR	N/A	N/A	Putative nuclear transport factor-2 OS=Rhipicephalus pulchellus PE=2 SV=1	TRUE	-0.876813	0.41431	120164	128259	114190	127602	13471.5	12628.2	-8095.16	0.936884	-0.028314	1.06737	0.094057
987	707	tr|A0A131YTF0|A0A131YTF0_RHIAP	N/A	N/A	Succinate--CoA ligase [GDP-forming] subunit beta, mitochondrial OS=Rhipicephalus appendiculatus PE=3 SV=1	TRUE	0.87135	0.41706	299751	287571	306623	285022	17956	21428.3	12180.1	1.04236	0.0180157	0.959366	-0.0598469
988	526	tr|L7M7W1|L7M7W1_9ACAR	N/A	N/A	Coatomer subunit delta OS=Rhipicephalus pulchellus PE=2 SV=1	TRUE	-0.850667	0.42759	138751	156814	129651	155937	42381.2	2730.6	-18063.5	0.88481	-0.0531501	1.13019	0.176561
989	449	tr|F1PTX4|F1PTX4_CANLF	N/A	N/A	Keratin, type II cytoskeletal 2 epidermal OS=Canis lupus familiaris GN=KRT2 PE=3 SV=2	TRUE	-0.848841	0.42853	61968.8	65233	63351.2	64824.3	7126.78	2891.9	-3264.29	0.94996	-0.0222949	1.05268	0.0740621
990	577	tr|L7LSQ1|L7LSQ1_9ACAR	N/A	N/A	Putative actin OS=Rhipicephalus pulchellus PE=2 SV=1	TRUE	0.846773	0.4296	138203	110626	135237	141278	16328.4	63054	27576.8	1.24928	0.0966594	0.800462	-0.321096
991	224	tr|A0A224YHD4|A0A224YHD4_9ACAR	N/A	N/A	Amblyomma 40 33 family member OS=Rhipicephalus zambeziensis PE=4 SV=1	TRUE	0.840754	0.43271	409132	399198	406809	399760	21199.8	10439.6	9933.86	1.02488	0.0106749	0.97572	-0.0354614
992	614	tr|A0A1E1X0M8|A0A1E1X0M8_9ACAR	N/A	N/A	Putative farnesoic acid o-methyltransferase (Fragment) OS=Amblyomma aureolatum PE=2 SV=1	TRUE	0.819466	0.44385	133920	127827	133906	133388	212.917	14868.9	6092.91	1.04767	0.0202225	0.954503	-0.0671777
993	949	tr|L7MC52|L7MC52_9ACAR	N/A	N/A	Putative cell division cycle 37 log (Fragment) OS=Rhipicephalus pulchellus PE=2 SV=1	TRUE	0.815547	0.44592	23223.1	21674.5	23194	21900.5	2861.91	2496.48	1548.63	1.07145	0.0299716	0.933315	-0.0995634
994	719	tr|L7M227|L7M227_9ACAR	N/A	N/A	T-complex protein 1 subunit gamma OS=Rhipicephalus pulchellus PE=2 SV=1	TRUE	0.801307	0.45351	56544.7	39777.3	37981.4	40912.9	41688.5	3673.38	16767.4	1.42153	0.152756	0.703467	-0.507446
995	96	tr|L7M7N7|L7M7N7_9ACAR	N/A	N/A	Aspartate aminotransferase OS=Rhipicephalus pulchellus PE=2 SV=1	TRUE	0.796816	0.45592	171136	122174	207939	119712	93615.6	79621.2	48962.7	1.40076	0.146365	0.713896	-0.486214
996	455	tr|G3MM82|G3MM82_9ACAR	N/A	N/A	Uncharacterized protein OS=Amblyomma maculatum PE=2 SV=1	TRUE	0.795289	0.45674	108309	97989.8	110644	106027	14387.5	21597.6	10319.3	1.10531	0.0434841	0.904724	-0.144451
997	599	tr|L7MJR7|L7MJR7_9ACAR	N/A	N/A	Putative phosphoglycerate mutase (Fragment) OS=Rhipicephalus pulchellus PE=2 SV=1	TRUE	0.794527	0.45716	284085	277699	282431	281840	9379.66	13054.7	6385.97	1.023	0.00987395	0.977521	-0.0328005
998	612	tr|L7M5T1|L7M5T1_9ACAR	N/A	N/A	3-hydroxyisobutyrate dehydrogenase OS=Rhipicephalus pulchellus PE=2 SV=1	TRUE	0.755237	0.47869	149794	146536	150547	147590	7622.86	4042.17	3258.2	1.02223	0.00955064	0.978249	-0.0317265
999	877	tr|A0A131XBM8|A0A131XBM8_9ACAR	N/A	N/A	Rab GDP dissociation inhibitor OS=Hyalomma excavatum PE=2 SV=1	TRUE	-0.736307	0.48932	402031	519454	403147	669661	21225.9	318245	-117423	0.773949	-0.111288	1.29208	0.36969
1000	637	tr|L7M6U9|L7M6U9_9ACAR	N/A	N/A	Uncharacterized protein OS=Rhipicephalus pulchellus PE=2 SV=1	TRUE	-0.727758	0.49417	17159.3	23196	11809.9	26243.5	10968.9	12446.3	-6036.76	0.73975	-0.130915	1.35181	0.43489
1001	685	tr|B7PLC7|B7PLC7_IXOSC	N/A	N/A	Cuticular protein, putative OS=Ixodes scapularis GN=8051792 PE=4 SV=1	TRUE	0.727318	0.49442	488178	468535	489662	468513	25940.5	47377.6	19642.8	1.04192	0.017836	0.959763	-0.0592498
1002	589	tr|A0A224Z0C7|A0A224Z0C7_9ACAR	N/A	N/A	Heat shock related protein (Fragment) OS=Rhipicephalus zambeziensis PE=3 SV=1	TRUE	0.721482	0.49775	42798.9	38258.8	40213.7	39532.8	6961.65	10485	4540.16	1.11867	0.0487019	0.893919	-0.161784
1003	1004	tr|A0A224YVP9|A0A224YVP9_9ACAR	N/A	N/A	Phosphatidylethanolamine binding protein OS=Rhipicephalus zambeziensis PE=4 SV=1	TRUE	-0.721439	0.49778	6740.42	9492.69	5485.79	10216	3816.72	6606.73	-2752.27	0.710064	-0.148703	1.40832	0.493979
1004	262	tr|A0A131YMQ4|A0A131YMQ4_RHIAP	N/A	N/A	T-complex protein 1 subunit zeta OS=Rhipicephalus appendiculatus PE=3 SV=1	TRUE	-0.717784	0.49987	171014	199399	175004	222891	32042.1	72309.7	-28385.1	0.857647	-0.0666917	1.16598	0.221545
1005	194	tr|V5I1T0|V5I1T0_IXORI	N/A	N/A	Histone H2B OS=Ixodes ricinus PE=2 SV=1	TRUE	-0.694986	0.51307	2.59403e+07	2.72331e+07	2.68675e+07	2.70027e+07	3.67933e+06	552310	-1.29287e+06	0.952526	-0.0211232	1.04984	0.0701697
1006	615	tr|L7M6U3|L7M6U3_9ACAR	N/A	N/A	Uncharacterized protein OS=Rhipicephalus pulchellus PE=2 SV=1	TRUE	0.676714	0.5238	117397	101661	138708	100470	46042.9	6556.93	15736.1	1.15479	0.0625032	0.865958	-0.207631
1007	929	tr|L7M7B6|L7M7B6_9ACAR	N/A	N/A	Putative rna-binding protein fus OS=Rhipicephalus pulchellus PE=2 SV=1	TRUE	-0.670157	0.52769	116003	162340	63202.2	182218	128367	51427.9	-46336.5	0.714571	-0.145955	1.39944	0.484851
1008	152	tr|A0A224YY13|A0A224YY13_9ACAR	N/A	N/A	Heteroproteinous nuclear ribonucleoprotein l OS=Rhipicephalus zambeziensis PE=4 SV=1	TRUE	0.664306	0.53118	261555	238112	288151	237745	63997.6	29760.2	23443	1.09845	0.0407816	0.910371	-0.135474
1009	511	tr|A0A131YW36|A0A131YW36_RHIAP	N/A	N/A	RNA binding protein fox-1 OS=Rhipicephalus appendiculatus PE=4 SV=1	TRUE	0.65897	0.53437	121236	116392	120175	114224	9189.68	11476.9	4844.33	1.04162	0.0177097	0.960042	-0.0588304
1010	757	tr|L7MAD1|L7MAD1_9ACAR	N/A	N/A	Putative pppde peptidase domain protein OS=Rhipicephalus pulchellus PE=2 SV=1	TRUE	-0.647305	0.54139	95652.4	97691.3	95022.6	96736.8	5054.79	3759.78	-2038.93	0.979129	-0.00916016	1.02132	0.0304294
1011	999	tr|A0A023GKN6|A0A023GKN6_9ACAR	N/A	N/A	Putative sulfotransferase domain protein (Fragment) OS=Amblyomma triste PE=2 SV=1	TRUE	-0.629517	0.55221	31569.6	35330.8	31127.7	34457.9	11512.5	3202.39	-3761.24	0.893542	-0.0488849	1.11914	0.162392
1012	926	tr|A0A131Z603|A0A131Z603_RHIAP	N/A	N/A	Ribosome recycling factor OS=Rhipicephalus appendiculatus PE=4 SV=1	TRUE	-0.626026	0.55435	55888.7	63245.5	54517.7	63898.2	23324.8	2889.08	-7356.78	0.883679	-0.0537055	1.13163	0.178406
1013	1060	tr|A0A224Z7S9|A0A224Z7S9_9ACAR	N/A	N/A	Rho GDP-dissociation inhibitor OS=Rhipicephalus zambeziensis PE=4 SV=1	TRUE	-0.613712	0.56194	41076.5	42868.6	40145.6	43787.3	5062.88	2911.33	-1792.12	0.958195	-0.0185461	1.04363	0.0616088
1014	422	tr|A0A131YLT1|A0A131YLT1_RHIAP	N/A	N/A	Myosin-light-chain kinase OS=Rhipicephalus appendiculatus PE=3 SV=1	TRUE	0.611427	0.56335	180695	177875	178008	177434	9104.66	1483	2820.1	1.01585	0.00683145	0.984393	-0.0226936
1015	305	tr|G3MRJ3|G3MRJ3_9ACAR	N/A	N/A	Uncharacterized protein OS=Amblyomma maculatum PE=2 SV=1	TRUE	-0.605894	0.56678	306731	331997	323512	330441	82878.8	9343.67	-25266.9	0.923894	-0.0343778	1.08238	0.1142
1016	254	tr|A0A131YYJ1|A0A131YYJ1_RHIAP	N/A	N/A	Glutamate formiminotransferase / formiminotetrahydrofolate cyclodeaminase OS=Rhipicephalus appendiculatus PE=4 SV=1	TRUE	-0.599508	0.57076	344218	357046	344325	355534	34382	25481.3	-12828	0.964072	-0.0158906	1.03727	0.0527873
1017	1047	tr|A0A224YS62|A0A224YS62_9ACAR	N/A	N/A	Acetylcholine regulator unc-18 OS=Rhipicephalus zambeziensis PE=3 SV=1	TRUE	-0.59933	0.57087	93745.9	107591	114992	107678	46197.1	763.414	-13845.5	0.871314	-0.0598254	1.14769	0.198736
1018	980	tr|A0A224YLB6|A0A224YLB6_9ACAR	N/A	N/A	Lipocalin OS=Rhipicephalus zambeziensis PE=4 SV=1	TRUE	0.578655	0.58387	23189.6	17718.3	29105.9	23406.2	14888.7	11659.1	5471.33	1.3088	0.116872	0.764061	-0.38824
1019	53	tr|L7M7J9|L7M7J9_9ACAR	N/A	N/A	Putative phosphoribosylamidoimidazole-succinocarboxamide synthase OS=Rhipicephalus pulchellus PE=2 SV=1	TRUE	-0.571511	0.58841	915276	1.13935e+06	910212	1.15307e+06	783139	39618	-224072	0.803333	-0.0951046	1.24481	0.31593
1020	678	tr|L7M9J6|L7M9J6_9ACAR	N/A	N/A	Coatomer subunit beta' OS=Rhipicephalus pulchellus PE=2 SV=1	TRUE	-0.556406	0.59806	53868.4	59014.6	53805.1	63639.2	7049.51	17102.1	-5146.21	0.912798	-0.0396255	1.09553	0.131633
1021	715	tr|V5I062|V5I062_IXORI	N/A	N/A	Putative negative regulation of transcription by glucose OS=Ixodes ricinus PE=2 SV=1	TRUE	-0.551457	0.60124	54346.7	57531.3	53910.5	57184.2	11202.2	2812.89	-3184.67	0.944645	-0.0247315	1.0586	0.0821564
1022	684	tr|A0A224YMC0|A0A224YMC0_9ACAR	N/A	N/A	Endoplasmic reticulum resident protein 44 OS=Rhipicephalus zambeziensis PE=4 SV=1	TRUE	-0.535871	0.61132	238995	268428	230861	257801	105630	30150.6	-29432.4	0.890353	-0.050438	1.12315	0.167551
1023	882	tr|A0A023FKD7|A0A023FKD7_9ACAR	N/A	N/A	Putative heat shock protein hsp 90-alpha isoform 1 (Fragment) OS=Amblyomma cajennense PE=2 SV=1	TRUE	-0.533772	0.61269	28334	32889.5	30333	33794.6	15732.4	6621.3	-4555.48	0.861491	-0.064749	1.16078	0.215092
1024	1017	tr|A0A224YNP2|A0A224YNP2_9ACAR	N/A	N/A	Protein, containing DUF885 domain OS=Rhipicephalus zambeziensis PE=4 SV=1	TRUE	0.521213	0.62089	54947.2	52265.1	51562.9	52945.9	10119.8	1873.92	2682.11	1.05132	0.0217339	0.951188	-0.0721983
1025	531	tr|A0A224ZBN2|A0A224ZBN2_9ACAR	N/A	N/A	Vigilin OS=Rhipicephalus zambeziensis PE=4 SV=1	TRUE	-0.514836	0.62508	131733	134881	132117	134744	9269.81	7978	-3148.27	0.976659	-0.0102571	1.0239	0.0340733
1026	330	tr|A0A131XMT9|A0A131XMT9_9ACAR	N/A	N/A	Putative aldehyde dehydrogenase OS=Hyalomma excavatum PE=2 SV=1	TRUE	-0.513624	0.62587	47361.8	53263	55258.6	56093.6	19286	12492.1	-5901.11	0.889208	-0.0509966	1.1246	0.169407
1027	789	tr|A0A131YJM2|A0A131YJM2_RHIAP	N/A	N/A	Acyl coa synthetase family member 2 OS=Rhipicephalus appendiculatus PE=4 SV=1	TRUE	0.511991	0.62695	55627.7	41211.6	37159.3	40856.1	56295.9	1414.75	14416	1.34981	0.130271	0.740848	-0.432751
1028	992	tr|A0A131Z4I2|A0A131Z4I2_RHIAP	N/A	N/A	Carboxylic ester hydrolase OS=Rhipicephalus appendiculatus PE=3 SV=1	TRUE	-0.496213	0.6374	38405.6	45462.1	38427.7	55891.5	2421.61	28338.2	-7056.53	0.844782	-0.0732552	1.18374	0.243349
1029	116	tr|A0A131Z2D8|A0A131Z2D8_RHIAP	N/A	N/A	T-complex protein 1 subunit beta OS=Rhipicephalus appendiculatus PE=3 SV=1	TRUE	0.493826	0.63898	171179	158597	171280	170436	36887.9	35156.2	12582.1	1.07933	0.0331558	0.926497	-0.110141
1030	867	tr|L7M423|L7M423_9ACAR	N/A	N/A	Putative ribosomal protein OS=Rhipicephalus pulchellus PE=2 SV=1	TRUE	-0.484684	0.64509	131635	134316	131359	134165	8561.32	7004.3	-2680.66	0.980042	-0.00875527	1.02036	0.0290844
1031	938	tr|A0A131XKI4|A0A131XKI4_9ACAR	N/A	N/A	Putative eukaryotic translation initiation factor 4h OS=Hyalomma excavatum PE=2 SV=1	TRUE	-0.481332	0.64733	37557.6	39140.8	38403.7	38878.1	4634.43	4668.81	-1583.2	0.959551	-0.0179319	1.04215	0.0595685
1032	55	tr|L7M942|L7M942_9ACAR	N/A	N/A	Putative beta-spectrin OS=Rhipicephalus pulchellus PE=2 SV=1	TRUE	-0.47931	0.64869	569255	601452	513741	626699	118035	64161.7	-32196.7	0.946468	-0.0238939	1.05656	0.0793738
1033	579	tr|A0A131Z512|A0A131Z512_RHIAP	N/A	N/A	26S proteasome regulatory subunit N12 OS=Rhipicephalus appendiculatus PE=4 SV=1	TRUE	-0.476158	0.6508	120761	124280	123907	122506	13441.4	6150.66	-3519.23	0.971683	-0.0124754	1.02914	0.0414423
1034	477	tr|A0A1E1XMV0|A0A1E1XMV0_9ACAR	N/A	N/A	Putative scaffold/matrix specific factor hnrnp-u/saf-a (Fragment) OS=Amblyomma sculptum PE=2 SV=1	TRUE	0.44284	0.6734	157018	155163	157496	154044	2480.12	8003.03	1855.17	1.01196	0.00516176	0.988185	-0.017147
1035	629	tr|L7M2M7|L7M2M7_9ACAR	N/A	N/A	Putative glycine rich protein OS=Rhipicephalus pulchellus PE=2 SV=1	TRUE	0.441323	0.67444	72634.8	53181.1	60654.8	16470.9	38326.2	79394.1	19453.7	1.3658	0.135387	0.732171	-0.449747
1036	721	tr|L7MAJ1|L7MAJ1_9ACAR	N/A	N/A	Putative fumarase OS=Rhipicephalus pulchellus PE=2 SV=1	TRUE	-0.440233	0.67518	69881.4	75317.4	69098.7	82112.5	3343.14	24468.6	-5435.98	0.927826	-0.0325336	1.07779	0.108074
1037	237	tr|L7M8R4|L7M8R4_9ACAR	N/A	N/A	Putative 26s protease regulatory subunit 7 OS=Rhipicephalus pulchellus PE=2 SV=1	TRUE	0.434498	0.67912	333970	298376	318369	298021	162939	17151.6	35594	1.11929	0.0489436	0.893422	-0.162587
1038	118	tr|A0A224Z5F6|A0A224Z5F6_9ACAR	N/A	N/A	Vinculin OS=Rhipicephalus zambeziensis PE=4 SV=1	TRUE	0.429557	0.68252	518157	509877	520190	517007	33594	18907.1	8279.52	1.01624	0.00699554	0.984021	-0.0232387
1039	187	tr|A0A224YV39|A0A224YV39_9ACAR	N/A	N/A	Nucleoside diphosphate kinase OS=Rhipicephalus zambeziensis PE=3 SV=1	TRUE	-0.42816	0.68348	2.10926e+06	2.14486e+06	2.12304e+06	2.2065e+06	48689.7	159003	-35599.6	0.983402	-0.00726876	1.01688	0.0241463
1040	814	tr|A0A131XD49|A0A131XD49_9ACAR	N/A	N/A	Putative 26s proteasome regulatory complex subunit OS=Hyalomma excavatum PE=2 SV=1	TRUE	0.426046	0.68493	17886.2	15052.5	19339.9	14873.3	8821.19	9957.1	2833.74	1.18826	0.0749106	0.841568	-0.248848
1041	320	tr|L7M3U7|L7M3U7_9ACAR	N/A	N/A	Putative myosin light chain cytoplasmic OS=Rhipicephalus pulchellus PE=2 SV=1	TRUE	0.416822	0.69131	201574	198536	199578	197314	13908.6	4371.7	3038.52	1.0153	0.00659637	0.984926	-0.0219127
1042	230	tr|L7MIQ1|L7MIQ1_9ACAR	N/A	N/A	Putative 26s proteasome regulatory complex subunit (Fragment) OS=Rhipicephalus pulchellus PE=2 SV=1	TRUE	0.410711	0.69555	270954	261824	281959	258035	38674.8	21930.9	9130.13	1.03487	0.0148863	0.966304	-0.0494512
1043	448	tr|L7ME31|L7ME31_9ACAR	N/A	N/A	Putative laminin a (Fragment) OS=Rhipicephalus pulchellus PE=2 SV=1	TRUE	0.398369	0.70415	107223	104075	110760	104997	14645.3	5946.07	3148.38	1.03025	0.0129431	0.970637	-0.042996
1044	310	tr|A0A224YY37|A0A224YY37_9ACAR	N/A	N/A	Ribose-phosphate pyrophosphokinase OS=Rhipicephalus zambeziensis PE=3 SV=1	TRUE	0.39561	0.70608	482469	464514	509116	484131	73786.1	52865.6	17954.7	1.03865	0.0164704	0.962786	-0.0547134
1045	245	tr|Q7Z0V0|Q7Z0V0_RHIMP	N/A	N/A	Ferritin OS=Rhipicephalus microplus PE=2 SV=1	TRUE	0.368882	0.72488	128580	123561	138523	121180	26688.3	5305.98	5018.75	1.04062	0.0172912	0.960968	-0.0574401
1046	830	tr|A0A131XD84|A0A131XD84_9ACAR	N/A	N/A	Putative thioredoxin-like protein OS=Hyalomma excavatum PE=2 SV=1	TRUE	0.34847	0.73939	23614	20993.6	28482.9	21600.7	14462.7	4123.95	2620.35	1.12482	0.0510817	0.889034	-0.16969
1047	12	tr|Q6X4V4|Q6X4V4_RHIMP	N/A	N/A	Actin OS=Rhipicephalus microplus PE=2 SV=1	TRUE	-0.318085	0.7612	132569	136151	125414	137248	19145.2	11868.1	-3582.47	0.973688	-0.0115804	1.02702	0.0384692
1048	708	tr|A0A224Z3K1|A0A224Z3K1_9ACAR	N/A	N/A	Very long chain acyl-CoA dehydrogenase OS=Rhipicephalus zambeziensis PE=3 SV=1	TRUE	-0.308691	0.76799	111219	120981	113702	145572	6403.61	62920.1	-9761.6	0.919313	-0.0365366	1.08777	0.121372
1049	676	tr|L7M6T3|L7M6T3_9ACAR	N/A	N/A	Putative glyoxalase 1 OS=Rhipicephalus pulchellus PE=2 SV=1	TRUE	-0.278672	0.78985	95703.7	100774	95345.8	115201	2620.1	36291.4	-5069.87	0.949691	-0.0224179	1.05297	0.0744706
1050	290	tr|A0A224YQQ2|A0A224YQQ2_9ACAR	N/A	N/A	Crystallin alpha B (Fragment) OS=Rhipicephalus zambeziensis PE=3 SV=1	TRUE	0.266883	0.79849	758625	743593	764232	766149	90727.6	66770.7	15032.1	1.02022	0.00869189	0.980185	-0.0288738
1051	965	tr|G3MNL2|G3MNL2_9ACAR	N/A	N/A	Uncharacterized protein OS=Amblyomma maculatum PE=2 SV=1	TRUE	0.240789	0.81774	6607.27	5872.23	6733.3	5104.81	2038.13	5754.99	735.037	1.12517	0.0512188	0.888753	-0.170145
1052	843	tr|A0A224YS77|A0A224YS77_9ACAR	N/A	N/A	26S proteasome regulatory subunit N5 (Fragment) OS=Rhipicephalus zambeziensis PE=4 SV=1	TRUE	0.2347	0.82225	12739.7	11826.1	15438.6	11805.3	7670.2	1331.56	913.563	1.07725	0.0323164	0.92829	-0.107353
1053	73	tr|L7M6Q5|L7M6Q5_9ACAR	N/A	N/A	Putative heat shock-related protein OS=Rhipicephalus pulchellus PE=2 SV=1	TRUE	-0.230257	0.82554	227637	233068	244261	235025	44261.9	16312.4	-5430.85	0.976698	-0.0102395	1.02386	0.0340149
1054	801	tr|A0A131XHZ5|A0A131XHZ5_9ACAR	N/A	N/A	Glucose-6-phosphate 1-dehydrogenase OS=Hyalomma excavatum PE=2 SV=1	TRUE	0.206535	0.8432	23167.7	21534.4	26305.1	24699.2	13915.2	7518.64	1633.33	1.07585	0.0317508	0.9295	-0.105474
1055	1024	tr|A0A224Y7S0|A0A224Y7S0_9ACAR	N/A	N/A	Pancreatic trypsin inhibitor OS=Rhipicephalus zambeziensis PE=4 SV=1	TRUE	-0.201165	0.84722	11633.2	13013.1	9697.21	13360.3	11261.5	7834.44	-1379.85	0.893965	-0.0486797	1.11861	0.161711
1056	911	tr|A0A023FST8|A0A023FST8_9ACAR	N/A	N/A	Putative large gyy 1 OS=Amblyomma cajennense PE=2 SV=1	TRUE	0.195569	0.8514	86695	77650.3	61193	85272.1	89790.3	22208.4	9044.68	1.11648	0.0478508	0.895672	-0.158957
1057	711	tr|L7M437|L7M437_9ACAR	N/A	N/A	Proteasome subunit beta type OS=Rhipicephalus pulchellus PE=2 SV=1	TRUE	-0.193491	0.85296	63487.8	64890.1	68522.8	65356.2	12797.3	6806.52	-1402.31	0.978389	-0.00948825	1.02209	0.0315193
1058	349	tr|A0A131YLJ8|A0A131YLJ8_RHIAP	N/A	N/A	Phosphoglucomutase OS=Rhipicephalus appendiculatus PE=4 SV=1	TRUE	0.186203	0.85842	197602	195982	199975	197844	15173.9	8517.39	1620.06	1.00827	0.00357528	0.991801	-0.0118768
1059	775	tr|L7M7B5|L7M7B5_9ACAR	N/A	N/A	Putative glutathione s-transferase OS=Rhipicephalus pulchellus PE=2 SV=1	TRUE	0.183248	0.86064	6015.33	5673.94	6159.92	6757.83	1235.12	3515.3	341.388	1.06017	0.0253746	0.943247	-0.0842925
1060	857	tr|L7LYF3|L7LYF3_9ACAR	N/A	N/A	Putative 26s proteasome regulatory complex subunit rpn7/psmd6 OS=Rhipicephalus pulchellus PE=2 SV=1	TRUE	-0.178722	0.86404	65732.1	66476.3	67517.9	66282.7	8285.97	831.417	-744.16	0.988806	-0.00488907	1.01132	0.0162411
1061	130	tr|A0A224YQ23|A0A224YQ23_9ACAR	N/A	N/A	26S protease regulatory subunit 6A-B OS=Rhipicephalus zambeziensis PE=3 SV=1	TRUE	-0.164466	0.87477	581641	589706	596687	613979	75587.7	62488.6	-8064.84	0.986324	-0.00598042	1.01387	0.0198665
1062	249	tr|A0A224Z386|A0A224Z386_9ACAR	N/A	N/A	Lamin B OS=Rhipicephalus zambeziensis PE=3 SV=1	TRUE	-0.16141	0.87707	459799	464554	466953	478362	34599.7	47682.2	-4754.56	0.989765	-0.00446776	1.01034	0.0148416
1063	1061	tr|A0A224YRU4|A0A224YRU4_9ACAR	N/A	N/A	Alanyl-tRNA synthetase OS=Rhipicephalus zambeziensis PE=3 SV=1	TRUE	-0.159875	0.87823	22533.2	23145.7	23661.4	23226.6	7240.71	2509.02	-612.567	0.973534	-0.0116487	1.02719	0.0386962
1064	1021	tr|A0A023FHU4|A0A023FHU4_9ACAR	N/A	N/A	Annexin (Fragment) OS=Amblyomma cajennense PE=2 SV=1	TRUE	0.138478	0.89439	68644.3	65525.8	86219.6	65608.2	44982	2272.38	3118.48	1.04759	0.020192	0.95457	-0.0670765
1065	603	tr|L7M975|L7M975_9ACAR	N/A	N/A	Serine/threonine-protein phosphatase OS=Rhipicephalus pulchellus PE=2 SV=1	TRUE	0.131403	0.89975	60020.6	53255.5	58534.2	15086.4	61630.2	82485.3	6765.06	1.12703	0.0519356	0.887288	-0.172526
1066	75	tr|A0A224YUR7|A0A224YUR7_9ACAR	N/A	N/A	Lysosomal acid phosphatase OS=Rhipicephalus zambeziensis PE=3 SV=1	TRUE	0.1284	0.90203	9.45012e+06	9.38805e+06	9.35187e+06	9.3158e+06	917059	306625	62079.2	1.00661	0.00286235	0.993431	-0.00950853
1067	295	tr|L7MAA3|L7MAA3_9ACAR	N/A	N/A	Putative chaperonin chaperonin OS=Rhipicephalus pulchellus PE=2 SV=1	TRUE	-0.118595	0.90947	301214	306354	264410	309147	86238.4	8796.99	-5140.26	0.983221	-0.00734878	1.01707	0.0244121
1068	578	tr|L7M493|L7M493_9ACAR	N/A	N/A	Putative complement component 1 q subcomponent binding protein/mrna splicing factor sf2 subunit p32 OS=Rhipicephalus pulchellus PE=2 SV=1	TRUE	-0.117804	0.91007	168433	172342	149864	177768	56212.6	35281.8	-3909.19	0.977317	-0.0099644	1.02321	0.033101
1069	838	tr|A0A131Z012|A0A131Z012_RHIAP	N/A	N/A	Sepiapterin reductase OS=Rhipicephalus appendiculatus PE=4 SV=1	TRUE	-0.117601	0.91022	56430.6	56728	57673.8	55435.5	3268.87	3859.19	-297.386	0.994758	-0.0022827	1.00527	0.00758295
1070	697	tr|A0A224YZ63|A0A224YZ63_9ACAR	N/A	N/A	Mitochondrial-associated endoribonuclease MAR1 OS=Rhipicephalus zambeziensis PE=4 SV=1	TRUE	-0.110947	0.91528	159249	166326	165781	170848	104253	73521.7	-7076.78	0.957452	-0.0188828	1.04444	0.0627273
1071	966	tr|G3MHQ9|G3MHQ9_9ACAR	N/A	N/A	Uncharacterized protein (Fragment) OS=Amblyomma maculatum PE=2 SV=1	TRUE	0.0992903	0.92414	96406	96139.2	96446.4	95616.6	5122.83	1628.52	266.865	1.00278	0.00120385	0.997232	-0.00399912
1072	595	tr|L7MFR3|L7MFR3_9ACAR	N/A	N/A	Putative carbonic anhydrase (Fragment) OS=Rhipicephalus pulchellus PE=2 SV=1	TRUE	-0.0903856	0.93092	157537	160810	173498	156398	43588	57845.1	-3273.27	0.979645	-0.00893125	1.02078	0.029669
1073	266	tr|L7M8B5|L7M8B5_9ACAR	N/A	N/A	Putative spliceosome rna helicase ddx39b OS=Rhipicephalus pulchellus PE=2 SV=1	TRUE	0.0665535	0.9491	403685	400998	369495	397057	79881.5	11755.9	2686.83	1.0067	0.00290022	0.993344	-0.00963431
1074	802	tr|A0A224YTN6|A0A224YTN6_9ACAR	N/A	N/A	Annexin OS=Rhipicephalus zambeziensis PE=3 SV=1	TRUE	-0.0609242	0.9534	224098	225615	218726	211693	30518.3	39344	-1516.79	0.993277	-0.00292958	1.00677	0.00973186
1075	1010	tr|L7LUH3|L7LUH3_9ACAR	N/A	N/A	Uncharacterized protein OS=Rhipicephalus pulchellus PE=2 SV=1	TRUE	-0.0548602	0.95803	104161	104302	104474	106184	1027.27	5029.99	-140.821	0.99865	-0.000586747	1.00135	0.00194913
1076	832	tr|L7M6S0|L7M6S0_9ACAR	N/A	N/A	Putative vesicle coat complex copii subunit sec13 OS=Rhipicephalus pulchellus PE=2 SV=1	TRUE	-0.0396413	0.96967	23018	23127.8	22341.5	24248.2	2734	4817.45	-109.79	0.995253	-0.00206656	1.00477	0.00686495
1077	433	tr|A0A224YS56|A0A224YS56_9ACAR	N/A	N/A	Proteasome subunit beta type OS=Rhipicephalus zambeziensis PE=3 SV=1	TRUE	0.025323	0.98062	176626	176063	186941	182123	37279	24177.4	562.585	1.0032	0.00138551	0.996815	-0.00460258
1078	823	tr|G3MGS0|G3MGS0_9ACAR	N/A	N/A	Uncharacterized protein (Fragment) OS=Amblyomma maculatum PE=2 SV=1	TRUE	0.0158509	0.98787	159111	158985	161176	158780	15209.9	4560.88	125.848	1.00079	0.000343639	0.999209	-0.00114154

## Sheet: Tick MGI RsJ vc. MGI RsS
										RsS	RsJ
Row	Index	Peak Name	m/z	Ret. Time	Group	SPECIES	Use	t-value	p-value	Mean 1	Mean 2	Median 1	Median 2	Sigma 1	Sigma 2	Delta	Fold Change	Log (Fold Change)	Fold Change (RsJ/RsS)	Log (Fold Change)
1	6	tr|J9P430|J9P430_CANLF	N/A	N/A	Transferrin OS	Canis lupus familiaris GN	TRUE	130.335	1.3758e-11	2.39532e+07	2.29158e+06	2.38985e+07	2.37764e+06	273725	188586	2.16616e+07	10.4527	1.01923	0.095669	-3.38581
2	359	tr|L7M046|L7M046_9ACAR	N/A	N/A	Putative cuticular protein OS	Rhipicephalus pulchellus PE	TRUE	-111.675	3.4756e-11	421850	1.67643e+06	420549	1.67797e+06	6530.13	21498.6	-1.25458e+06	0.251636	-0.599227	3.97399	1.99059
3	885	tr|A0A131XQY3|A0A131XQY3_9ACAR	N/A	N/A	Putative grp-3 497 glycine rich family OS	Hyalomma excavatum PE	TRUE	-108.698	4.087e-11	6415.92	560376	4053.64	561431	6567.74	7794.6	-553960	0.0114493	-1.94122	87.3415	6.4486
4	221	tr|F1PCE5|F1PCE5_CANLF	N/A	N/A	Serpin family A member 1 OS	Canis lupus familiaris GN	TRUE	92.3093	1.089e-10	6.18782e+06	698827	6.23627e+06	696282	118402	11153.2	5.48899e+06	8.85457	0.947168	0.112936	-3.14642
5	147	tr|A0A224Z4Q3|A0A224Z4Q3_9ACAR	N/A	N/A	40S ribosomal protein SA OS	Rhipicephalus zambeziensis PE	TRUE	-84.6462	1.8311e-10	1.13433e+06	2.61049e+06	1.13728e+06	2.60925e+06	30531.3	16862.5	-1.47616e+06	0.434527	-0.361983	2.30135	1.20248
6	76	tr|A0A224YPB3|A0A224YPB3_9ACAR	N/A	N/A	Heat shock protein OS	Rhipicephalus zambeziensis PE	TRUE	-82.5008	2.1358e-10	881375	2.66927e+06	879008	2.665e+06	20205.6	38344.7	-1.7879e+06	0.330193	-0.481232	3.02853	1.59862
7	241	tr|A0A131XAX9|A0A131XAX9_9ACAR	N/A	N/A	Putative nadh-ubiquinone oxidoreductase ndufs1/75 kDa subunit OS	Hyalomma excavatum PE	TRUE	-80.0937	2.5506e-10	254428	622637	256070	620807	4239.01	8158.99	-368209	0.408629	-0.38867	2.4472	1.29113
8	588	tr|Q4PM27|Q4PM27_IXOSC	N/A	N/A	Ribosomal protein L11 OS	Ixodes scapularis GN	TRUE	-79.5332	2.6603e-10	546518	1.66377e+06	546223	1.66275e+06	20168.4	19559.8	-1.11725e+06	0.328481	-0.48349	3.04432	1.60612
9	862	tr|B7P5Q1|B7P5Q1_IXOSC	N/A	N/A	Cuticle protein, putative OS	Ixodes scapularis GN	TRUE	-77.7524	3.0471e-10	40413.8	318191	40854	317125	3509.07	6224.13	-277777	0.127011	-0.896157	7.87331	2.97697
10	356	tr|Q4PM42|Q4PM42_IXOSC	N/A	N/A	Ribosomal protein S15Aa OS	Ixodes scapularis PE	TRUE	-73.4567	4.284e-10	696300	1.50491e+06	697875	1.50693e+06	9002.98	20091.1	-808611	0.462685	-0.334714	2.1613	1.1119
11	312	tr|V5I100|V5I100_IXORI	N/A	N/A	Putative 60s ribosomal protein l23 apis mellifera (Fragment) OS	Ixodes ricinus PE	TRUE	-71.92	4.8628e-10	1.12372e+06	2.9968e+06	1.12277e+06	2.99556e+06	36292.6	37362.9	-1.87308e+06	0.374974	-0.425998	2.66685	1.41514
12	95	tr|L7MAK0|L7MAK0_9ACAR	N/A	N/A	Putative acetyl-coa hydrolase OS	Rhipicephalus pulchellus PE	TRUE	-70.9837	5.2601e-10	813001	1.8529e+06	811773	1.86041e+06	15289.2	24994.2	-1.0399e+06	0.438772	-0.357761	2.27909	1.18846
13	670	tr|A0A131YMZ1|A0A131YMZ1_RHIAP	N/A	N/A	Metastriate one of each protein family OS	Rhipicephalus appendiculatus PE	TRUE	-70.8837	5.3047e-10	4916.85	541805	4376.73	539800	3788.24	14667.1	-536888	0.00907493	-2.04216	110.194	6.7839
14	377	tr|E2R5U8|E2R5U8_CANLF	N/A	N/A	Transthyretin OS	Canis lupus familiaris GN	TRUE	70.7628	5.3593e-10	801174	137256	800710	139245	12249.3	14215	663918	5.83709	0.766197	0.171318	-2.54525
15	212	tr|F1PBK6|F1PBK6_CANLF	N/A	N/A	Carbonic anhydrase 1 OS	Canis lupus familiaris GN	TRUE	70.6166	5.4261e-10	1.85967e+06	480531	1.8672e+06	473911	30759.5	24073.2	1.37914e+06	3.87002	0.587714	0.258396	-1.95234
16	1026	tr|A0A0A7DS60|A0A0A7DS60_RHIMP	N/A	N/A	Phosphoglucomutase (Fragment) OS	Rhipicephalus microplus PE	TRUE	70.4932	5.4833e-10	97235.8	12951	97200.2	12406.8	1857.04	1506.54	84284.8	7.50798	0.875523	0.133192	-2.90843
17	273	tr|A0A131YXW9|A0A131YXW9_RHIAP	N/A	N/A	Beat protein like 1 OS	Rhipicephalus appendiculatus PE	TRUE	69.4424	5.9998e-10	670547	259208	671723	259980	10739.4	5001.52	411339	2.58691	0.412781	0.386562	-1.37123
18	288	tr|L7M7R7|L7M7R7_9ACAR	N/A	N/A	Putative atp synthase subunit b OS	Rhipicephalus pulchellus PE	TRUE	-68.0882	6.7515e-10	536106	1.03744e+06	532972	1.03779e+06	14096.7	4258.95	-501335	0.516758	-0.286713	1.93514	0.952439
19	142	tr|A0A224YZR0|A0A224YZR0_9ACAR	N/A	N/A	Solute carrier family 25 (Mitochondrial adenine nucleotide translocator) member 4/5/6/31 OS	Rhipicephalus zambeziensis PE	TRUE	-67.1016	7.3686e-10	584843	1.91735e+06	582903	1.92264e+06	31672.9	23962.3	-1.3325e+06	0.305027	-0.515661	3.2784	1.71299
20	344	tr|A0A224YB78|A0A224YB78_9ACAR	N/A	N/A	Lipocalin OS	Rhipicephalus zambeziensis PE	TRUE	66.0017	8.1359e-10	753354	163794	752498	164560	17073.7	5258.11	589560	4.59941	0.662702	0.217419	-2.20145
21	148	tr|E2QUV3|E2QUV3_CANLF	N/A	N/A	Alpha 2-HS glycoprotein OS	Canis lupus familiaris GN	TRUE	65.6254	8.4195e-10	8.21266e+06	936410	8.24239e+06	931105	221242	15019.3	7.27625e+06	8.77037	0.943018	0.11402	-3.13264
22	532	tr|C9W1E7|C9W1E7_RHISA	N/A	N/A	Cement-like antigen OS	Rhipicephalus sanguineus PE	TRUE	-64.2591	9.5508e-10	11504.7	1.38273e+06	11266.5	1.37382e+06	1452.27	42653.3	-1.37123e+06	0.0083203	-2.07986	120.188	6.90915
23	742	tr|A0A224Z3J0|A0A224Z3J0_9ACAR	N/A	N/A	Ribosomal protein l35a OS	Rhipicephalus zambeziensis PE	TRUE	-64.2421	9.566e-10	228227	591299	226427	591130	6328.69	9365.41	-363072	0.385975	-0.413441	2.59084	1.37342
24	151	tr|A0A131Z9A0|A0A131Z9A0_RHIAP	N/A	N/A	BIGH3 (Fragment) OS	Rhipicephalus appendiculatus PE	TRUE	-62.3956	1.1393e-09	129667	754948	126777	756715	7540.86	18569.8	-625282	0.171756	-0.765089	5.82223	2.54157
25	275	tr|L7MHR9|L7MHR9_9ACAR	N/A	N/A	Putative 60s ribosomal protein l23 (Fragment) OS	Rhipicephalus pulchellus PE	TRUE	-62.1278	1.169e-09	773510	2.2114e+06	779990	2.21531e+06	41788.8	19907.3	-1.43789e+06	0.349782	-0.456202	2.85892	1.51547
26	226	tr|L7M6I8|L7M6I8_9ACAR	N/A	N/A	Putative ribosomal protein s13 OS	Rhipicephalus pulchellus PE	TRUE	-62.0542	1.1773e-09	482695	980110	478403	980071	9858.54	12642.1	-497415	0.492491	-0.307602	2.03049	1.02183
27	43	tr|F1P841|F1P841_CANLF	N/A	N/A	GC, vitamin D binding protein OS	Canis lupus familiaris GN	TRUE	61.2147	1.2775e-09	4.78083e+06	520104	4.78675e+06	519816	138830	10217.6	4.26072e+06	9.19206	0.963413	0.10879	-3.20039
28	712	tr|G3MPE3|G3MPE3_9ACAR	N/A	N/A	Peptidylprolyl isomerase OS	Amblyomma maculatum PE	TRUE	60.8198	1.328e-09	395925	195074	393906	195704	5374.58	3838.9	200851	2.02961	0.307413	0.492705	-1.0212
29	1035	tr|A0A224YSS4|A0A224YSS4_9ACAR	N/A	N/A	Erythrocyte membrane protein 1 OS	Rhipicephalus zambeziensis PE	TRUE	-60.4468	1.3778e-09	131885	413908	129637	415997	5187.44	7756.48	-282023	0.318634	-0.496707	3.13839	1.65003
30	990	tr|A0A1E1XIJ1|A0A1E1XIJ1_9ACAR	N/A	N/A	Putative secreted salivary gland protein OS	Amblyomma aureolatum PE	TRUE	-60.0764	1.4295e-09	44005.4	161305	44871.7	160624	3329.38	2040.67	-117300	0.272809	-0.564142	3.66557	1.87404
31	648	tr|G3MRM3|G3MRM3_9ACAR	N/A	N/A	Uncharacterized protein OS	Amblyomma maculatum PE	TRUE	-58.5925	1.6606e-09	395976	1.68636e+06	411051	1.68643e+06	34143.1	27826.5	-1.29039e+06	0.234811	-0.629282	4.25875	2.09043
32	27	tr|F1PW65|F1PW65_CANLF	N/A	N/A	Fibrinogen beta chain OS	Canis lupus familiaris GN	TRUE	57.5569	1.8478e-09	2.75253e+06	411563	2.72352e+06	406509	75660.1	29873.9	2.34097e+06	6.68799	0.825295	0.149522	-2.74157
33	574	tr|L7MAQ1|L7MAQ1_9ACAR	N/A	N/A	Putative cytochrome b-c1 complex subunit 2 mitochondrial OS	Rhipicephalus pulchellus PE	TRUE	-56.6146	2.0399e-09	182559	508178	184114	507441	6353.39	9589.27	-325620	0.359241	-0.444614	2.78364	1.47697
34	943	tr|Q4PM83|Q4PM83_IXOSC	N/A	N/A	Ribosomal protein L27A OS	Ixodes scapularis GN	TRUE	-55.0567	2.411e-09	86339.6	572450	84904.5	570858	4686.91	17025.2	-486110	0.150825	-0.821527	6.63021	2.72906
35	19	tr|L7MAA0|L7MAA0_9ACAR	N/A	N/A	ATP synthase subunit alpha OS	Rhipicephalus pulchellus PE	TRUE	-54.049	2.693e-09	202714	705342	202104	706816	14846.9	11202.3	-502628	0.287398	-0.541516	3.47949	1.79888
36	104	tr|A0A224YSG5|A0A224YSG5_9ACAR	N/A	N/A	Large subunit ribosomal protein L5e OS	Rhipicephalus zambeziensis PE	TRUE	-53.2612	2.9406e-09	619473	1.11848e+06	617826	1.11541e+06	9714.54	16023.1	-499003	0.553855	-0.256604	1.80553	0.852421
37	351	tr|L7MJ32|L7MJ32_9ACAR	N/A	N/A	Putative ribosomal protein l17 (Fragment) OS	Rhipicephalus pulchellus PE	TRUE	-51.8346	3.4597e-09	404965	1.22497e+06	411999	1.21611e+06	17375.8	26440.9	-820004	0.330592	-0.480708	3.02488	1.59688
38	171	tr|A0A224Z6N2|A0A224Z6N2_9ACAR	N/A	N/A	Regulatory protein mlp OS	Rhipicephalus zambeziensis PE	TRUE	-51.8192	3.4659e-09	4.81021e+06	1.32633e+07	4.82802e+06	1.32625e+07	209603	250014	-8.45306e+06	0.362672	-0.440486	2.75731	1.46326
39	355	tr|A0A224YNP1|A0A224YNP1_9ACAR	N/A	N/A	Glycine rich cell wall structural protein OS	Rhipicephalus zambeziensis PE	TRUE	-51.6238	3.5452e-09	220205	476927	219080	476531	8771.21	4688.97	-256722	0.461716	-0.335625	2.16583	1.11492
40	427	tr|A0A131YDG8|A0A131YDG8_RHIAP	N/A	N/A	Cuticular protein OS	Rhipicephalus appendiculatus PE	TRUE	-51.5884	3.5598e-09	789136	4.52718e+06	787444	4.56318e+06	50101	135982	-3.73804e+06	0.174311	-0.758676	5.73688	2.52027
41	636	tr|A0A131XTW8|A0A131XTW8_IXORI	N/A	N/A	Putative muscle m-line assembly protein unc-89 (Fragment) OS	Ixodes ricinus PE	TRUE	-51.4679	3.61e-09	89652	245173	89574.4	244030	2234.91	5614.97	-155521	0.365669	-0.436912	2.73472	1.45139
42	269	tr|V5HMI8|V5HMI8_IXORI	N/A	N/A	40S ribosomal protein S8 (Fragment) OS	Ixodes ricinus PE	TRUE	-51.3063	3.6786e-09	1.01407e+06	2.10064e+06	1.006e+06	2.1039e+06	35168.1	23606.9	-1.08658e+06	0.48274	-0.316286	2.07151	1.05068
43	70	tr|L7LTQ8|L7LTQ8_9ACAR	N/A	N/A	Putative heteroproteinous nuclear ribonucleoprotein at 87f OS	Rhipicephalus pulchellus PE	TRUE	-51.1494	3.7467e-09	2.93605e+06	7.35229e+06	2.94809e+06	7.35865e+06	142075	98148.4	-4.41624e+06	0.399338	-0.39866	2.50415	1.32432
44	587	tr|E3UCD8|E3UCD8_HYAAA	N/A	N/A	Ribosomal protein L24 OS	Hyalomma anatolicum anatolicum PE	TRUE	-50.0324	4.2763e-09	420834	1.11406e+06	419222	1.10901e+06	21157.5	17895.9	-693225	0.377748	-0.422798	2.64727	1.4045
45	419	tr|J9P028|J9P028_CANLF	N/A	N/A	Glutathione peroxidase OS	Canis lupus familiaris GN	TRUE	49.9511	4.3181e-09	1.75289e+06	224158	1.7404e+06	225483	59703.3	13493.6	1.52873e+06	7.81989	0.893201	0.127879	-2.96715
46	115	tr|A0A131YXB1|A0A131YXB1_RHIAP	N/A	N/A	ATP-dependent RNA helicase DDX3X OS	Rhipicephalus appendiculatus PE	TRUE	-49.95	4.3187e-09	232875	557863	230426	556561	9241.99	9160.31	-324988	0.417442	-0.379404	2.39554	1.26035
47	869	tr|L7M7G4|L7M7G4_9ACAR	N/A	N/A	Putative actin-binding cytoskeleton protein filamin OS	Rhipicephalus pulchellus PE	TRUE	49.5431	4.5354e-09	207325	51851.4	209107	51688.1	5997.95	1848.39	155474	3.99845	0.601892	0.250097	-1.99944
48	939	tr|A0A0C9SF82|A0A0C9SF82_AMBAM	N/A	N/A	Putative tick til 20 OS	Amblyomma americanum PE	TRUE	49.4797	4.5703e-09	131523	8606.2	131200	8175.77	3244.5	3762.69	122917	15.2823	1.18419	0.065435	-3.93379
49	397	tr|G3MSP2|G3MSP2_9ACAR	N/A	N/A	Uncharacterized protein OS	Amblyomma maculatum PE	TRUE	-49.3873	4.6218e-09	465311	964666	469427	959662	9529.89	17835.7	-499355	0.482354	-0.316634	2.07316	1.05183
50	5	tr|F2Z4Q6|F2Z4Q6_CANLF	N/A	N/A	Serum albumin OS	Canis lupus familiaris GN	TRUE	49.2842	4.68e-09	1.25179e+06	155147	1.23691e+06	154941	44310.9	4128.04	1.09664e+06	8.06842	0.906789	0.12394	-3.01229
51	279	tr|E2R8Z5|E2R8Z5_CANLF	N/A	N/A	Keratin 5 OS	Canis lupus familiaris GN	TRUE	-49.2568	4.6956e-09	208104	319801	207928	320453	3196.39	3217.46	-111697	0.650729	-0.1866	1.53674	0.619871
52	225	tr|J9NSF9|J9NSF9_CANLF	N/A	N/A	Prothrombin OS	Canis lupus familiaris GN	TRUE	48.939	4.8811e-09	741354	88506.3	744107	80987.6	17516.6	20124.4	652848	8.37629	0.923052	0.119385	-3.06631
53	624	tr|A0A1E1X068|A0A1E1X068_9ACAR	N/A	N/A	Cystatin (Fragment) OS	Amblyomma aureolatum PE	TRUE	48.2056	5.343e-09	633803	15574.8	631974	13708.5	25308.4	4170.39	618229	40.6942	1.60953	0.0245735	-5.34675
54	125	tr|G3MMG2|G3MMG2_9ACAR	N/A	N/A	40S ribosomal protein S4 OS	Amblyomma maculatum PE	TRUE	-47.8792	5.5647e-09	1.44938e+06	4.1204e+06	1.4498e+06	4.11113e+06	55693.6	96679.1	-2.67102e+06	0.351757	-0.453758	2.84288	1.50735
55	948	tr|L7MFW4|L7MFW4_9ACAR	N/A	N/A	Putative asparaginase (Fragment) OS	Rhipicephalus pulchellus PE	TRUE	47.6532	5.7246e-09	72717.8	11434.2	72041.5	11495.1	2355.1	1033.95	61283.6	6.3597	0.803436	0.15724	-2.66896
56	903	tr|A0A0C9R303|A0A0C9R303_AMBAM	N/A	N/A	Putative hnrnp-l/ptb/hephaestus splicing factor family (Fragment) OS	Amblyomma americanum PE	TRUE	-47.5969	5.7653e-09	61298.5	202553	61369.2	203985	3220.8	4985.61	-141255	0.302629	-0.51909	3.30438	1.72438
57	168	tr|A0A224YGJ1|A0A224YGJ1_9ACAR	N/A	N/A	Acetyl-CoA acyltransferase OS	Rhipicephalus zambeziensis PE	TRUE	-47.5674	5.7867e-09	888592	2.72174e+06	870113	2.70449e+06	67847.2	36571.3	-1.83315e+06	0.326479	-0.486145	3.06299	1.61494
58	199	tr|A0A224Z4I9|A0A224Z4I9_9ACAR	N/A	N/A	Mitochondrial-processing peptidase subunit beta OS	Rhipicephalus zambeziensis PE	TRUE	-47.3044	5.982e-09	446903	1.07843e+06	442815	1.07863e+06	18046.3	19678.7	-631526	0.414402	-0.382578	2.41312	1.2709
59	58	tr|F1P8G0|F1P8G0_CANLF	N/A	N/A	Fibrinogen gamma chain OS	Canis lupus familiaris GN	TRUE	47.2602	6.0155e-09	4.7287e+06	599355	4.78752e+06	600474	171403	34036.4	4.12934e+06	7.88964	0.897057	0.126749	-2.97996
60	623	tr|A0A224YIB0|A0A224YIB0_9ACAR	N/A	N/A	Uncharacterized protein OS	Rhipicephalus zambeziensis PE	TRUE	46.785	6.3906e-09	478489	10932.9	469686	10286.5	19640.3	3708.91	467556	43.7661	1.64114	0.0228487	-5.45174
61	35	tr|H9GWY1|H9GWY1_CANLF	N/A	N/A	Inter-alpha-trypsin inhibitor heavy chain family member 4 OS	Canis lupus familiaris GN	TRUE	45.5121	7.5378e-09	2.62744e+06	426614	2.61631e+06	432366	74657.6	61480.4	2.20083e+06	6.15883	0.789498	0.162369	-2.62266
62	150	tr|A0A131XI55|A0A131XI55_9ACAR	N/A	N/A	Putative f0f1-type atp synthase gamma subunit OS	Hyalomma excavatum PE	TRUE	-45.2713	7.781e-09	450564	1.47743e+06	452139	1.47988e+06	4019.54	45186.8	-1.02687e+06	0.304964	-0.515751	3.27908	1.71329
63	357	tr|A0A224Z1P8|A0A224Z1P8_9ACAR	N/A	N/A	Large subunit ribosomal protein L22e OS	Rhipicephalus zambeziensis PE	TRUE	-45.0948	7.965e-09	1.73272e+06	4.08001e+06	1.73214e+06	4.0903e+06	73039.3	74182.9	-2.34729e+06	0.424685	-0.371934	2.35469	1.23554
64	443	tr|G3MNV3|G3MNV3_9ACAR	N/A	N/A	Uncharacterized protein OS	Amblyomma maculatum PE	TRUE	-45.0532	8.0091e-09	506683	1.24983e+06	511248	1.25432e+06	25314.5	21154	-743144	0.405403	-0.392114	2.46668	1.30257
65	244	tr|L7M5X2|L7M5X2_9ACAR	N/A	N/A	Putative ribosomal protein OS	Rhipicephalus pulchellus PE	TRUE	-44.7227	8.3699e-09	520437	1.79252e+06	517977	1.79194e+06	49361.3	28278.6	-1.27209e+06	0.290338	-0.537097	3.44427	1.7842
66	954	tr|L7M062|L7M062_9ACAR	N/A	N/A	Putative acyl-coa-binding protein OS	Rhipicephalus pulchellus PE	TRUE	44.6366	8.467e-09	134312	38075.2	135385	38012.8	4042.89	1499.5	96236.8	3.52755	0.547473	0.283483	-1.81867
67	272	tr|E2R9B6|E2R9B6_CANLF	N/A	N/A	Fetuin B OS	Canis lupus familiaris GN	TRUE	44.6284	8.4764e-09	510540	76709.5	511835	77965.3	14461.7	12994.1	433830	6.6555	0.823181	0.150252	-2.73455
68	1001	tr|A0A023FVW4|A0A023FVW4_9ACAR	N/A	N/A	Putative tick defensins 1 OS	Amblyomma parvum PE	TRUE	-44.6212	8.4844e-09	7355.32	114849	7514.13	115842	1818.15	4461.83	-107494	0.0640433	-1.19353	15.6144	3.96481
69	166	tr|L7M7M2|L7M7M2_9ACAR	N/A	N/A	Uncharacterized protein OS	Rhipicephalus pulchellus PE	TRUE	-44.5008	8.6228e-09	230296	668956	228301	666434	14505.1	13351.8	-438659	0.344263	-0.46311	2.90476	1.53842
70	71	tr|A0A131XGU0|A0A131XGU0_9ACAR	N/A	N/A	Putative translation initiation factor 2c eif-2c (Fragment) OS	Hyalomma excavatum PE	TRUE	-44.4418	8.6915e-09	817652	1.73586e+06	831344	1.73611e+06	40978.8	5313.35	-918208	0.471036	-0.326946	2.12298	1.08609
71	242	tr|L7M6S3|L7M6S3_9ACAR	N/A	N/A	Putative bifunctional atp sulfurylase/adenosine 5'-phosphosulfate kinase OS	Rhipicephalus pulchellus PE	TRUE	44.3768	8.768e-09	546305	114130	551798	112587	12414.7	15008.3	432175	4.7867	0.680036	0.208912	-2.25903
72	378	tr|A0A023FQI7|A0A023FQI7_9ACAR	N/A	N/A	Putative cell-matrix adhesion (Fragment) OS	Amblyomma cajennense PE	TRUE	-43.8913	9.3646e-09	145536	254133	146146	254548	4279.61	2484.35	-108597	0.572678	-0.24209	1.74618	0.804204
73	498	tr|J9P1M7|J9P1M7_CANLF	N/A	N/A	Uncharacterized protein OS	Canis lupus familiaris PE	TRUE	43.5953	9.7516e-09	246353	43126.3	246633	43161.7	6889.6	6281.59	203227	5.71237	0.756816	0.175059	-2.51409
74	868	tr|A0A224YCX8|A0A224YCX8_9ACAR	N/A	N/A	Pancreatic trypsin inhibitor OS	Rhipicephalus zambeziensis PE	TRUE	43.353	1.0082e-08	235901	44524.5	236253	47247.6	5622.29	6807.12	191377	5.29823	0.724131	0.188742	-2.40551
75	208	tr|A0A0C9SCJ0|A0A0C9SCJ0_AMBAM	N/A	N/A	Putative 60 kDa chaperonin (Fragment) OS	Amblyomma americanum PE	TRUE	-43.3142	1.0136e-08	1.02212e+06	3.1965e+06	1.04416e+06	3.19052e+06	69306.1	72642.4	-2.17438e+06	0.319761	-0.495174	3.12733	1.64493
76	335	tr|E2R886|E2R886_CANLF	N/A	N/A	Uncharacterized protein OS	Canis lupus familiaris PE	TRUE	43.2113	1.0282e-08	714793	112435	710494	113285	26762.5	7813.24	602358	6.35739	0.803279	0.157297	-2.66843
77	62	tr|E2RES2|E2RES2_CANLF	N/A	N/A	Serpin family C member 1 OS	Canis lupus familiaris GN	TRUE	43.1855	1.0318e-08	2.05804e+06	246566	2.0592e+06	245829	83424.6	8849.63	1.81147e+06	8.34681	0.92152	0.119806	-3.06122
78	1053	tr|A0A0A7MGQ1|A0A0A7MGQ1_9ACAR	N/A	N/A	Cystatin OS	Rhipicephalus haemaphysaloides PE	TRUE	42.9305	1.0691e-08	72437.3	15407.3	71997.9	15510.2	2413.53	1110.74	57030	4.70149	0.672235	0.212699	-2.23312
79	887	tr|A0A023GJ81|A0A023GJ81_9ACAR	N/A	N/A	Putative grp-3 498 glycine rich family OS	Amblyomma triste PE	TRUE	-42.9066	1.0726e-08	438755	1.06128e+06	441780	1.06791e+06	14716.6	25008.8	-622522	0.413422	-0.383606	2.41883	1.27431
80	69	tr|L7MBN6|L7MBN6_9ACAR	N/A	N/A	Putative 24 kDa family member OS	Rhipicephalus pulchellus PE	TRUE	-42.8202	1.0856e-08	645305	1.63676e+06	653018	1.62586e+06	26129.2	38232.2	-991460	0.394256	-0.404221	2.53642	1.34279
81	211	tr|E2QVU9|E2QVU9_CANLF	N/A	N/A	Biliverdin reductase B OS	Canis lupus familiaris GN	TRUE	41.8221	1.2502e-08	797180	204047	806718	206801	23680.6	15613.4	593133	3.90684	0.591826	0.255961	-1.966
82	45	tr|J9NVC6|J9NVC6_CANLF	N/A	N/A	Immunoglobulin heavy constant mu OS	Canis lupus familiaris GN	TRUE	41.7204	1.2685e-08	5.08839e+06	693160	5.04724e+06	685830	204937	48940.4	4.39523e+06	7.34087	0.865747	0.136224	-2.87595
83	350	tr|A0A224Z3D1|A0A224Z3D1_9ACAR	N/A	N/A	Large subunit ribosomal protein L27e OS	Rhipicephalus zambeziensis PE	TRUE	-41.6003	1.2906e-08	886695	2.72428e+06	889343	2.7146e+06	46032.8	75404.4	-1.83759e+06	0.325478	-0.487478	3.0724	1.61937
84	137	tr|L7ME84|L7ME84_9ACAR	N/A	N/A	Putative nucleoside diphosphate-sugar hydrolase of the mutt nudix family (Fragment) OS	Rhipicephalus pulchellus PE	TRUE	41.5823	1.2939e-08	577271	136984	578436	138037	20736.3	4295.87	440286	4.21413	0.624708	0.237297	-2.07524
85	217	tr|L7M6Q0|L7M6Q0_9ACAR	N/A	N/A	Eukaryotic translation initiation factor 5A OS	Rhipicephalus pulchellus PE	TRUE	-41.2505	1.3574e-08	349108	1.00168e+06	353255	998123	23133.6	21584.2	-652567	0.348524	-0.457767	2.86924	1.52067
86	94	tr|J9P8M2|J9P8M2_CANLF	N/A	N/A	Fibronectin OS	Canis lupus familiaris GN	TRUE	40.4887	1.5175e-08	667701	117220	661666	114784	20431.5	17942.9	550481	5.69612	0.755579	0.175558	-2.50998
87	892	tr|L7M6N0|L7M6N0_9ACAR	N/A	N/A	Putative eukaryotic translation initiation factor OS	Rhipicephalus pulchellus PE	TRUE	40.4804	1.5194e-08	77274.5	12194.2	77505.9	11519.6	2842.09	1503.75	65080.2	6.33698	0.801882	0.157804	-2.66379
88	503	tr|V5H340|V5H340_IXORI	N/A	N/A	Putative vitellogenin-1 OS	Ixodes ricinus PE	TRUE	40.241	1.5743e-08	276538	90099.4	275140	89461.9	8433.57	3838.74	186439	3.06926	0.487033	0.325812	-1.61789
89	36	tr|A0A224YTT8|A0A224YTT8_9ACAR	N/A	N/A	Glutamate dehydrogenase (NAD(P)+) OS	Rhipicephalus zambeziensis PE	TRUE	-40.1992	1.5841e-08	1.8e+06	3.81561e+06	1.78431e+06	3.81227e+06	79943.4	60541.8	-2.01561e+06	0.471747	-0.326291	2.11978	1.08392
90	129	tr|A0A224Z0H9|A0A224Z0H9_9ACAR	N/A	N/A	RNA-binding protein LARK OS	Rhipicephalus zambeziensis PE	TRUE	39.5968	1.7338e-08	285424	17240.6	284596	19807.1	8928.6	10186.6	268183	16.5553	1.21894	0.0604036	-4.04922
91	741	tr|A0A224YMT2|A0A224YMT2_9ACAR	N/A	N/A	F-type H+-transporting ATPase subunit f OS	Rhipicephalus zambeziensis PE	TRUE	-39.3881	1.7894e-08	126955	313578	129375	313375	8399.43	4387.06	-186623	0.404858	-0.392697	2.47	1.30451
92	991	tr|A0A1E1XEJ2|A0A1E1XEJ2_9ACAR	N/A	N/A	Pyrroline-5-carboxylate reductase (Fragment) OS	Amblyomma aureolatum PE	TRUE	-39.2151	1.8371e-08	65404.1	159372	65693.4	158860	3062.17	3686.54	-93968	0.410386	-0.386807	2.43673	1.28495
93	1000	tr|A0A023GBH4|A0A023GBH4_9ACAR	N/A	N/A	Putative secreted protein OS	Amblyomma triste PE	TRUE	39.0188	1.8931e-08	185164	18217.9	184006	16514.9	6873.63	5096.91	166946	10.1638	1.00706	0.0983883	-3.34537
94	307	tr|A0A224Z0W8|A0A224Z0W8_9ACAR	N/A	N/A	Large subunit ribosomal protein L8e OS	Rhipicephalus zambeziensis PE	TRUE	-38.8187	1.9522e-08	467045	1.29248e+06	465443	1.29604e+06	26370.6	33364.4	-825431	0.361357	-0.442064	2.76735	1.4685
95	86	tr|A0A224ZC41|A0A224ZC41_9ACAR	N/A	N/A	Z band alternatively spliced pdz motif protein 66 OS	Rhipicephalus zambeziensis PE	TRUE	-38.5322	2.0406e-08	1.33668e+06	2.70632e+06	1.33504e+06	2.71755e+06	35456.5	61617.9	-1.36965e+06	0.493909	-0.306353	2.02467	1.01768
96	1025	tr|L7M0V0|L7M0V0_9ACAR	N/A	N/A	Putative heat shock-related protein OS	Rhipicephalus pulchellus PE	TRUE	-38.3931	2.0852e-08	99965.8	233769	100133	235546	3100.76	6242.45	-133803	0.427627	-0.368934	2.33848	1.22557
97	159	tr|A0A131YNN3|A0A131YNN3_RHIAP	N/A	N/A	15-hydroxyprostaglandin dehydrogenase (NAD) OS	Rhipicephalus appendiculatus PE	TRUE	-38.3903	2.0861e-08	2.09605e+06	5.38622e+06	2.12538e+06	5.38497e+06	93776.6	143479	-3.29017e+06	0.389151	-0.409882	2.5697	1.3616
98	902	tr|A0A023FXL4|A0A023FXL4_9ACAR	N/A	N/A	Protein disulfide-isomerase OS	Amblyomma parvum PE	TRUE	38.3585	2.0965e-08	311708	12470.7	309676	9491.51	14178.6	6511.06	299237	24.9952	1.39786	0.0400076	-4.64358
99	158	tr|F1PAX2|F1PAX2_CANLF	N/A	N/A	Ceruloplasmin OS	Canis lupus familiaris GN	TRUE	38.2493	2.1325e-08	772796	103647	776584	103433	17090.8	30530.6	669149	7.45605	0.872509	0.134119	-2.89841
100	642	tr|E2R5J0|E2R5J0_CANLF	N/A	N/A	Pentaxin OS	Canis lupus familiaris GN	TRUE	38.1079	2.1803e-08	106612	10885.4	107425	12596.4	1834.39	4677.12	95726.8	9.79408	0.990963	0.102103	-3.29191
101	717	tr|L7M621|L7M621_9ACAR	N/A	N/A	Putative translocon-associated protein OS	Rhipicephalus pulchellus PE	TRUE	-38.0283	2.2077e-08	103065	220971	103662	220420	3893.81	4826.01	-117906	0.466417	-0.331225	2.144	1.10031
102	127	tr|A0A224Z3F9|A0A224Z3F9_9ACAR	N/A	N/A	Large subunit ribosomal protein L4e OS	Rhipicephalus zambeziensis PE	TRUE	-37.8109	2.2847e-08	1.44106e+06	3.28419e+06	1.4467e+06	3.27373e+06	66436.2	71350.6	-1.84313e+06	0.438787	-0.357746	2.27901	1.18841
103	165	tr|A0A034WWK3|A0A034WWK3_RHIMP	N/A	N/A	Peptidyl-prolyl cis-trans isomerase OS	Rhipicephalus microplus PE	TRUE	37.6008	2.3621e-08	587957	291595	589356	291569	15095.9	4539.23	296361	2.01634	0.304565	0.495947	-1.01174
104	67	tr|A0A131YJK6|A0A131YJK6_RHIAP	N/A	N/A	Acetyl-CoA acyltransferase 2 OS	Rhipicephalus appendiculatus PE	TRUE	-37.5766	2.3712e-08	1.5256e+06	2.53901e+06	1.5211e+06	2.55518e+06	23318.5	48637.4	-1.01341e+06	0.600864	-0.221224	1.66427	0.73489
105	260	tr|A0A224Y422|A0A224Y422_9ACAR	N/A	N/A	Glycine rich superfamily member OS	Rhipicephalus zambeziensis PE	TRUE	-37.464	2.4141e-08	2.92386e+06	7.42618e+06	2.96772e+06	7.35589e+06	180734	158447	-4.50232e+06	0.393723	-0.40481	2.53986	1.34475
106	31	tr|L7M5D0|L7M5D0_9ACAR	N/A	N/A	Putative synaptic vesicle membrane protein vat-1 OS	Rhipicephalus pulchellus PE	TRUE	36.8214	2.6771e-08	672938	15612.6	672272	10488.4	30790.4	18074.4	657325	43.1022	1.6345	0.0232007	-5.42969
107	842	tr|A0A131XP84|A0A131XP84_9ACAR	N/A	N/A	Aconitate hydratase, mitochondrial OS	Hyalomma excavatum PE	TRUE	-36.7417	2.712e-08	64068.4	161124	64587.6	161516	5034.52	1601.54	-97055.4	0.397635	-0.400516	2.51487	1.33048
108	787	tr|L7M2W1|L7M2W1_9ACAR	N/A	N/A	Putative der and-48 ribosomal protein l32 OS	Rhipicephalus pulchellus PE	TRUE	-36.6308	2.7615e-08	99215.2	201771	97689.2	201446	4722.26	3008.93	-102555	0.491723	-0.30828	2.03367	1.02408
109	548	tr|A0A224YW41|A0A224YW41_9ACAR	N/A	N/A	Cytochrome b-c1 complex subunit Rieske, mitochondrial OS	Rhipicephalus zambeziensis PE	TRUE	-36.2406	2.944e-08	231850	548174	233817	550338	11972.3	12704.6	-316324	0.42295	-0.373711	2.36435	1.24144
110	723	tr|A0A023G0K4|A0A023G0K4_9ACAR	N/A	N/A	Putative transforming growth factor-beta-induced protein ig-h3 OS	Amblyomma parvum PE	TRUE	-36.0664	3.03e-08	66445.4	436634	68740.1	433842	16636.2	12026.7	-370188	0.152177	-0.817652	6.57131	2.71618
111	932	tr|G3MTP1|G3MTP1_9ACAR	N/A	N/A	Uncharacterized protein OS	Amblyomma maculatum PE	TRUE	35.8248	3.1542e-08	1.43802e+06	297725	1.4397e+06	299872	62685.1	11096.5	1.1403e+06	4.83003	0.68395	0.207038	-2.27203
112	758	tr|A0A131YI52|A0A131YI52_RHIAP	N/A	N/A	L-iditol 2-dehydrogenase OS	Rhipicephalus appendiculatus PE	TRUE	35.6921	3.2249e-08	104562	58506.6	105110	58597.6	2373.27	1013.71	46055.2	1.78718	0.252169	0.55954	-0.837686
113	112	tr|L7LZL3|L7LZL3_9ACAR	N/A	N/A	Putative tho complex subunit 4 OS	Rhipicephalus pulchellus PE	TRUE	-35.6672	3.2384e-08	816991	2.31167e+06	805124	2.32124e+06	75094.3	37220.7	-1.49468e+06	0.35342	-0.451708	2.82949	1.50054
114	14	tr|F6UME0|F6UME0_CANLF	N/A	N/A	Alpha-2-macroglobulin OS	Canis lupus familiaris GN	TRUE	35.5461	3.3048e-08	1.79088e+06	273465	1.7929e+06	274070	81753.4	24610.5	1.51742e+06	6.54885	0.816165	0.152699	-2.71124
115	141	tr|L7LXX6|L7LXX6_9ACAR	N/A	N/A	Putative rna-binding protein hnrnp-m OS	Rhipicephalus pulchellus PE	TRUE	-35.2608	3.4679e-08	840999	1.63395e+06	837873	1.63694e+06	32887.6	30680.3	-792951	0.514703	-0.288443	1.94287	0.958188
116	468	tr|F1PYX9|F1PYX9_CANLF	N/A	N/A	Serpin family G member 1 OS	Canis lupus familiaris GN	TRUE	34.8988	3.6884e-08	468736	54550.3	468150	55153.5	23538.8	3056.28	414186	8.59274	0.934132	0.116377	-3.10312
117	61	tr|A0A224YU86|A0A224YU86_9ACAR	N/A	N/A	Myosin heavy chain 6/7 OS	Rhipicephalus zambeziensis PE	TRUE	-34.845	3.7225e-08	62960.5	132976	64070.1	133296	2941.01	2738.66	-70015.5	0.473473	-0.324705	2.11205	1.07865
118	298	tr|L7M4Q4|L7M4Q4_9ACAR	N/A	N/A	60S ribosomal protein L18a OS	Rhipicephalus pulchellus PE	TRUE	-34.466	3.9738e-08	656623	1.52669e+06	655788	1.54514e+06	8009.23	49848.9	-870064	0.430097	-0.366434	2.32506	1.21727
119	520	tr|A0A023GL48|A0A023GL48_9ACAR	N/A	N/A	Putative aldehyde dehydrogenase OS	Amblyomma triste PE	TRUE	34.4482	3.9862e-08	1.83668e+06	975146	1.82988e+06	969623	42550.7	26294	861537	1.8835	0.274965	0.530928	-0.913413
120	562	tr|L7M432|L7M432_9ACAR	N/A	N/A	Histone H2A OS	Rhipicephalus pulchellus PE	TRUE	-34.3314	4.0679e-08	538873	1.13631e+06	528447	1.13265e+06	23973.3	25230.8	-597433	0.474232	-0.324009	2.10867	1.07633
121	324	tr|A0A224YW31|A0A224YW31_9ACAR	N/A	N/A	Erythrocyte membrane protein 1 (Fragment) OS	Rhipicephalus zambeziensis PE	TRUE	-34.2322	4.1388e-08	230417	539572	227216	543861	12590.2	12951.1	-309154	0.427038	-0.369534	2.34171	1.22757
122	874	tr|A0A224Z7I1|A0A224Z7I1_9ACAR	N/A	N/A	Synaptic vesicle membrane protein vat 1 OS	Rhipicephalus zambeziensis PE	TRUE	-34.1143	4.225e-08	4697.81	635789	3572.02	629859	2899.16	36884.9	-631091	0.00738895	-2.13142	135.337	7.08042
123	50	tr|G1K2D9|G1K2D9_CANLF	N/A	N/A	Haptoglobin OS	Canis lupus familiaris GN	TRUE	33.8908	4.3941e-08	1.50665e+07	1.0173e+06	1.52311e+07	1.12516e+06	783443	271298	1.40492e+07	14.8103	1.17056	0.0675207	-3.88853
124	216	tr|E2QZQ1|E2QZQ1_CANLF	N/A	N/A	Uncharacterized protein OS	Canis lupus familiaris GN	TRUE	33.7842	4.4776e-08	893767	123915	907915	120020	40209.5	21453.6	769853	7.21275	0.858101	0.138643	-2.85055
125	59	tr|A0A224Z6S5|A0A224Z6S5_9ACAR	N/A	N/A	40S ribosomal protein S3a OS	Rhipicephalus zambeziensis PE	TRUE	-33.4434	4.7571e-08	1.31718e+06	3.00465e+06	1.31519e+06	3.01896e+06	25580.7	97619.1	-1.68747e+06	0.438379	-0.35815	2.28113	1.18975
126	604	tr|V5HUX3|V5HUX3_IXORI	N/A	N/A	Putative 60s ribosomal protein l38 OS	Ixodes ricinus PE	TRUE	-33.3695	4.8204e-08	403353	794395	400729	795181	8688.07	21767.3	-391042	0.507749	-0.294351	1.96948	0.977813
127	39	tr|E2RS80|E2RS80_CANLF	N/A	N/A	Uncharacterized protein OS	Canis lupus familiaris GN	TRUE	33.3193	4.8638e-08	1.96547e+06	327759	1.95493e+06	330142	32208.3	92878.1	1.63772e+06	5.9967	0.777912	0.166758	-2.58417
128	924	tr|J9P0I1|J9P0I1_CANLF	N/A	N/A	Keratin, type I cytoskeletal 9 OS	Canis lupus familiaris GN	TRUE	-33.2892	4.8902e-08	1.1846e+06	2.54776e+06	1.17715e+06	2.54282e+06	70171.5	42229.2	-1.36317e+06	0.464956	-0.332588	2.15074	1.10483
129	17	sp|P60524|HBB_CANLF	N/A	N/A	Hemoglobin subunit beta OS	Canis lupus familiaris GN	TRUE	33.2891	4.8903e-08	2.83802e+07	5.96253e+06	2.8303e+07	5.9214e+06	1.3365e+06	166626	2.24177e+07	4.75975	0.677585	0.210095	-2.25089
130	358	tr|L7MFA9|L7MFA9_9ACAR	N/A	N/A	Putative 40s ribosomal protein s2 (Fragment) OS	Rhipicephalus pulchellus PE	TRUE	-33.0967	5.0625e-08	789388	1.3752e+06	791281	1.36943e+06	32267.3	14560.1	-585815	0.574016	-0.241076	1.74211	0.800838
131	84	tr|F1PZR4|F1PZR4_CANLF	N/A	N/A	Hemopexin OS	Canis lupus familiaris GN	TRUE	33.0933	5.0657e-08	1.23759e+07	1.7712e+06	1.24031e+07	1.76352e+06	640293	27787.1	1.06047e+07	6.98727	0.844308	0.143117	-2.80473
132	146	tr|Q4PM69|Q4PM69_IXOSC	N/A	N/A	Histone H4 OS	Ixodes scapularis GN	TRUE	-33.0596	5.0966e-08	4.21067e+07	7.17728e+07	4.22289e+07	7.17482e+07	1.64371e+06	720549	-2.96661e+07	0.586667	-0.231609	1.70455	0.769387
133	302	tr|A0A224Z1B9|A0A224Z1B9_9ACAR	N/A	N/A	Small subunit ribosomal protein S18e OS	Rhipicephalus zambeziensis PE	TRUE	-32.9236	5.2236e-08	496604	1.32906e+06	513471	1.33907e+06	44261.4	24457.4	-832459	0.37365	-0.427535	2.6763	1.42024
134	1029	tr|L7M6C3|L7M6C3_9ACAR	N/A	N/A	Putative mitochondrial tricarboxylate/dicarboxylate carrier OS	Rhipicephalus pulchellus PE	TRUE	-32.6847	5.4557e-08	23648.4	102085	23147.2	103329	1796.32	4450.73	-78436.2	0.231655	-0.635159	4.31677	2.10995
135	659	tr|A0A023G4G2|A0A023G4G2_9ACAR	N/A	N/A	Putative cuticular protein 76bd OS	Amblyomma triste PE	TRUE	-32.6539	5.4865e-08	68967.9	307049	70512.1	304335	8627.95	11755.6	-238081	0.224616	-0.64856	4.45205	2.15447
136	653	tr|L7MBH0|L7MBH0_9ACAR	N/A	N/A	Putative secreted peptide OS	Rhipicephalus pulchellus PE	TRUE	32.6051	5.5358e-08	214273	50013.7	216444	51740.3	7600.66	6614.35	164259	4.28429	0.631879	0.233411	-2.09906
137	453	tr|F1PAL5|F1PAL5_CANLF	N/A	N/A	Angiotensinogen OS	Canis lupus familiaris GN	TRUE	32.5366	5.6056e-08	223301	28913.1	219739	27884.9	9835.39	6785.28	194388	7.72316	0.887795	0.129481	-2.94919
138	292	tr|Q4PMD3|Q4PMD3_IXOSC	N/A	N/A	40S ribosomal protein S10 OS	Ixodes scapularis GN	TRUE	-32.515	5.628e-08	1.19632e+06	3.11594e+06	1.19679e+06	3.07181e+06	42834.6	110032	-1.91962e+06	0.383936	-0.415741	2.6046	1.38106
139	218	tr|F1PCG4|F1PCG4_CANLF	N/A	N/A	Peroxiredoxin 2 OS	Canis lupus familiaris GN	TRUE	32.5115	5.6315e-08	4.0479e+06	855947	4.08538e+06	869848	192780	37314.3	3.19195e+06	4.72915	0.674783	0.211455	-2.24158
140	899	tr|A0A1E1X830|A0A1E1X830_9ACAR	N/A	N/A	Putative glutathione s-transferase (Fragment) OS	Amblyomma aureolatum PE	TRUE	32.51	5.6331e-08	120159	12714	119673	13431.8	6418.81	1578.05	107445	9.45087	0.975472	0.10581	-3.24045
141	371	tr|F1PDY8|F1PDY8_CANLF	N/A	N/A	Carbonic anhydrase 2 OS	Canis lupus familiaris GN	TRUE	32.4882	5.6557e-08	448121	85619.5	446534	89574.8	19270.1	11254.4	362501	5.23386	0.718822	0.191063	-2.38788
142	928	tr|L7M3S2|L7M3S2_9ACAR	N/A	N/A	Putative elongation factor 1 beta OS	Rhipicephalus pulchellus PE	TRUE	32.3496	5.8019e-08	72526.5	16045.2	72789.7	15702.7	3322.3	1075.09	56481.2	4.52012	0.65515	0.221233	-2.17636
143	264	tr|A0A224YPY7|A0A224YPY7_9ACAR	N/A	N/A	2-oxoglutarate dehydrogenase E2 component (Dihydrolipoamide succinyltransferase) OS	Rhipicephalus zambeziensis PE	TRUE	-31.5945	6.6803e-08	472495	891364	471916	893566	21770.9	15135.7	-418869	0.53008	-0.275658	1.88651	0.915717
144	164	tr|C9W1L7|C9W1L7_RHISA	N/A	N/A	60S ribosomal protein L9 OS	Rhipicephalus sanguineus PE	TRUE	-31.5444	6.744e-08	539046	1.08557e+06	537877	1.08816e+06	13355.1	31974.2	-546525	0.496555	-0.304032	2.01387	1.00997
145	193	tr|A0A224YZF6|A0A224YZF6_9ACAR	N/A	N/A	Glutathione S-transferase OS	Rhipicephalus zambeziensis PE	TRUE	31.3019	7.0619e-08	3.99015e+06	820174	4.0549e+06	819377	201185	23403.3	3.16997e+06	4.865	0.687083	0.20555	-2.28244
146	584	tr|E2R7W6|E2R7W6_CANLF	N/A	N/A	Uncharacterized protein OS	Canis lupus familiaris GN	TRUE	-31.2802	7.0911e-08	354913	603561	355144	603542	14149.7	7248.06	-248648	0.588032	-0.230599	1.70059	0.766034
147	1056	tr|A0A224Z9L1|A0A224Z9L1_9ACAR	N/A	N/A	Superoxide dismutase Cu-Zn family (Fragment) OS	Rhipicephalus zambeziensis PE	TRUE	31.278	7.0941e-08	111312	87241.1	111359	87232.4	1533.65	129.769	24070.5	1.27591	0.105819	0.783755	-0.351525
148	790	tr|A0A224YML8|A0A224YML8_9ACAR	N/A	N/A	Lipocalin OS	Rhipicephalus zambeziensis PE	TRUE	31.1483	7.2722e-08	238547	20152.9	239613	20109.1	8831.8	10892.2	218394	11.8369	1.07324	0.0844818	-3.56522
149	522	tr|A0A131XRP8|A0A131XRP8_9ACAR	N/A	N/A	60S ribosomal protein L6 OS	Hyalomma excavatum PE	TRUE	-31.1111	7.3243e-08	207529	521348	215333	521605	18474	8105.76	-313818	0.398063	-0.400048	2.51216	1.32893
150	89	tr|L7LRH1|L7LRH1_9ACAR	N/A	N/A	Putative glycine rich protein OS	Rhipicephalus pulchellus PE	TRUE	-31.0817	7.3657e-08	5.09177e+06	9.91575e+06	5.09805e+06	9.88624e+06	269988	153163	-4.82399e+06	0.513503	-0.289457	1.94741	0.961557
151	174	tr|L7M3S8|L7M3S8_9ACAR	N/A	N/A	Putative ribosomal protein s16 OS	Rhipicephalus pulchellus PE	TRUE	-31.0102	7.4677e-08	1.03544e+06	2.15334e+06	1.03648e+06	2.14518e+06	28638.7	66167.4	-1.1179e+06	0.480852	-0.317989	2.07964	1.05634
152	144	tr|A0A224YEQ4|A0A224YEQ4_9ACAR	N/A	N/A	Glycine rich superfamily member (Fragment) OS	Rhipicephalus zambeziensis PE	TRUE	-30.9172	7.6027e-08	4.48875e+06	9.58716e+06	4.49379e+06	9.60495e+06	245659	220060	-5.09841e+06	0.468204	-0.329565	2.13582	1.09479
153	500	tr|J9NRV7|J9NRV7_CANLF	N/A	N/A	Fibrinogen alpha chain OS	Canis lupus familiaris GN	TRUE	30.6622	7.9879e-08	733696	57849.5	740837	56316.5	42358.6	12210.4	675846	12.6828	1.10322	0.0788467	-3.66481
154	172	tr|A0A224YZD3|A0A224YZD3_9ACAR	N/A	N/A	Small subunit ribosomal protein S19e OS	Rhipicephalus zambeziensis PE	TRUE	-30.5936	8.0953e-08	575284	1.11666e+06	573506	1.11662e+06	18907	29918.1	-541379	0.515182	-0.28804	1.94106	0.956847
155	135	tr|E2RCC8|E2RCC8_CANLF	N/A	N/A	Immunoglobulin heavy constant mu OS	Canis lupus familiaris GN	TRUE	30.3924	8.4205e-08	4.40433e+06	401701	4.38702e+06	396785	262925	15758.5	4.00263e+06	10.9642	1.03998	0.0912059	-3.45473
156	109	tr|A0A224YHY0|A0A224YHY0_9ACAR	N/A	N/A	Aspartate aminotransferase OS	Rhipicephalus zambeziensis PE	TRUE	-30.3796	8.4415e-08	1.18286e+06	2.02445e+06	1.19012e+06	2.01453e+06	45233.8	31993.8	-841589	0.584286	-0.233374	1.71149	0.775252
157	761	tr|J9JHH5|J9JHH5_CANLF	N/A	N/A	Joining chain of multimeric IgA and IgM OS	Canis lupus familiaris GN	TRUE	30.3747	8.4498e-08	311781	51713.6	310693	51762.9	17086	1139.22	260068	6.02899	0.780245	0.165865	-2.59192
158	1062	tr|A0A131XPE0|A0A131XPE0_9ACAR	N/A	N/A	Isocitrate dehydrogenase [NADP] OS	Hyalomma excavatum PE	TRUE	30.3231	8.5358e-08	351114	99899.8	345271	98709.5	16327.8	2818.07	251214	3.51466	0.545884	0.284522	-1.81339
159	338	tr|L7M6Q1|L7M6Q1_9ACAR	N/A	N/A	Putative bisphosphate 3'-nucleotidase bpnt1/inositol polyphosphate 1-phosphatase OS	Rhipicephalus pulchellus PE	TRUE	30.1213	8.8827e-08	372229	205517	373425	205325	5874.72	9381.79	166711	1.81118	0.257961	0.552126	-0.856929
160	188	tr|A0A131YXL2|A0A131YXL2_RHIAP	N/A	N/A	Elongation factor Tu OS	Rhipicephalus appendiculatus PE	TRUE	-30.0141	9.0737e-08	330055	722832	329249	718871	18680.6	18331.7	-392777	0.456614	-0.340451	2.19003	1.13095
161	925	tr|A0A131YGD2|A0A131YGD2_RHIAP	N/A	N/A	Glycine rich superfamily member OS	Rhipicephalus appendiculatus PE	TRUE	29.9433	9.2025e-08	63112.5	7294.71	63667.8	6284.94	1159.44	3543.37	55817.8	8.65182	0.937108	0.115583	-3.113
162	878	tr|A0A131XF49|A0A131XF49_9ACAR	N/A	N/A	Putative secreted salivary gland peptide OS	Hyalomma excavatum PE	TRUE	29.9014	9.2796e-08	311058	14108.3	318837	15214.1	18556.8	7081.26	296950	22.0479	1.34337	0.0453558	-4.46257
163	136	tr|E2R4E7|E2R4E7_CANLF	N/A	N/A	Afamin OS	Canis lupus familiaris GN	TRUE	29.7169	9.6285e-08	1.19856e+06	141863	1.21182e+06	140048	70698.1	7712.01	1.0567e+06	8.44872	0.926791	0.118361	-3.07873
164	472	tr|A0A131YI86|A0A131YI86_RHIAP	N/A	N/A	Cystatin-A/B OS	Rhipicephalus appendiculatus PE	TRUE	29.5938	9.87e-08	162791	25750.9	161499	24997.6	9083.81	1804.93	137040	6.32175	0.800837	0.158184	-2.66032
165	92	tr|A0A131Z0F3|A0A131Z0F3_RHIAP	N/A	N/A	Uncharacterized protein OS	Rhipicephalus appendiculatus PE	TRUE	-29.4011	1.0262e-07	9.90907e+06	1.34508e+07	9.90865e+06	1.33975e+07	34120.5	238494	-3.54169e+06	0.736692	-0.132714	1.35742	0.440866
166	739	tr|L7M4K4|L7M4K4_9ACAR	N/A	N/A	Uncharacterized protein OS	Rhipicephalus pulchellus PE	TRUE	-29.3781	1.031e-07	127000	252699	127067	250789	2718.72	8113.94	-125699	0.502575	-0.298799	1.98975	0.992588
167	812	tr|A0A224YRP1|A0A224YRP1_9ACAR	N/A	N/A	Adenylate cyclase terminal differentiation specific OS	Rhipicephalus zambeziensis PE	TRUE	-29.2474	1.0588e-07	269973	433609	269931	430880	7653.56	8163.02	-163636	0.622618	-0.205779	1.60612	0.683582
168	362	tr|C9W1K7|C9W1K7_RHISA	N/A	N/A	Cytochrome c oxidase polypeptide Vb OS	Rhipicephalus sanguineus PE	TRUE	-29.1139	1.0881e-07	201676	323264	200262	321821	7552.27	3567.72	-121588	0.623874	-0.204903	1.60289	0.680673
169	114	tr|A0A023FX57|A0A023FX57_9ACAR	N/A	N/A	Annexin (Fragment) OS	Amblyomma parvum PE	TRUE	-29.0972	1.0918e-07	350232	540644	344606	540351	12135.7	4901.03	-190412	0.647806	-0.188555	1.54367	0.626367
170	556	tr|J9JHZ3|J9JHZ3_CANLF	N/A	N/A	Uncharacterized protein OS	Canis lupus familiaris PE	TRUE	28.9999	1.1138e-07	2.77979e+06	163967	2.79339e+06	164122	180382	2663.68	2.61582e+06	16.9534	1.22926	0.0589853	-4.0835
171	276	tr|A0A131XJK5|A0A131XJK5_9ACAR	N/A	N/A	Putative rho guanine nucleotide exchange factor cdep OS	Hyalomma excavatum PE	TRUE	-28.9591	1.1232e-07	218458	652709	227495	655437	26091	14788.5	-434251	0.334694	-0.475351	2.9878	1.57908
172	323	tr|L7LY48|L7LY48_9ACAR	N/A	N/A	Putative transcriptional regulator dj-1 OS	Rhipicephalus pulchellus PE	TRUE	-28.8367	1.152e-07	231627	570918	234608	573793	13860.6	19016.7	-339291	0.40571	-0.391785	2.46482	1.30148
173	380	tr|L7N095|L7N095_CANLF	N/A	N/A	Keratin 5 OS	Canis lupus familiaris GN	TRUE	-28.8008	1.1605e-07	606817	1.19097e+06	601516	1.1922e+06	29229.8	28127.2	-584153	0.509515	-0.292843	1.96265	0.972803
174	639	tr|F1PY40|F1PY40_CANLF	N/A	N/A	Complement factor I OS	Canis lupus familiaris GN	TRUE	28.4595	1.246e-07	207142	36359.2	205800	36233.2	9370.43	7499.22	170783	5.6971	0.755654	0.175528	-2.51023
175	445	tr|L7M3E5|L7M3E5_9ACAR	N/A	N/A	Putative cytochrome c oxidase subunit iv/cox5b OS	Rhipicephalus pulchellus PE	TRUE	-28.3998	1.2617e-07	297281	723646	306561	730030	24193.3	17783.1	-426364	0.410811	-0.386358	2.43421	1.28345
176	185	tr|A0A224YUJ4|A0A224YUJ4_9ACAR	N/A	N/A	Leucyl aminopeptidase OS	Rhipicephalus zambeziensis PE	TRUE	28.3432	1.2768e-07	900866	482115	900923	485792	19080	22562.6	418751	1.86857	0.27151	0.535168	-0.901935
177	368	tr|A0A224Z0L0|A0A224Z0L0_9ACAR	N/A	N/A	Histone H1/5 OS	Rhipicephalus zambeziensis PE	TRUE	-28.3374	1.2784e-07	407639	1.89531e+06	397667	1.90184e+06	42681.7	95929.9	-1.48767e+06	0.215078	-0.667403	4.64947	2.21707
178	256	tr|A0A224YTJ8|A0A224YTJ8_9ACAR	N/A	N/A	Ankyrin OS	Rhipicephalus zambeziensis PE	TRUE	-28.3352	1.279e-07	281559	535597	283368	540442	6780.11	16599.7	-254039	0.525691	-0.27927	1.90226	0.927714
179	293	tr|L7M022|L7M022_9ACAR	N/A	N/A	Uncharacterized protein OS	Rhipicephalus pulchellus PE	TRUE	-28.2047	1.3146e-07	393057	895109	390736	897584	11151.5	33808.9	-502051	0.439117	-0.35742	2.2773	1.18732
180	906	tr|A0A131Z0H3|A0A131Z0H3_RHIAP	N/A	N/A	Abc transporter OS	Rhipicephalus appendiculatus PE	TRUE	28.1944	1.3175e-07	594966	282042	600704	279064	18347.5	12494.2	312924	2.1095	0.324179	0.474047	-1.0769
181	501	tr|F1PPK4|F1PPK4_CANLF	N/A	N/A	Uncharacterized protein OS	Canis lupus familiaris PE	TRUE	28.1741	1.3232e-07	167995	21806.7	170295	24810.7	8071.73	6522.3	146189	7.70384	0.886707	0.129805	-2.94558
182	409	tr|A0A023GGV5|A0A023GGV5_9ACAR	N/A	N/A	Putative creatine kinase OS	Amblyomma triste PE	TRUE	-27.9441	1.3894e-07	125048	326476	129764	324175	10719.7	9639.7	-201428	0.383023	-0.416776	2.61081	1.3845
183	891	tr|A0A023GNQ8|A0A023GNQ8_9ACAR	N/A	N/A	Putative t-complex protein 1 (Fragment) OS	Amblyomma triste PE	TRUE	27.8633	1.4136e-07	76802.2	7544.84	76860.2	7007.03	4686.2	1659.1	69257.3	10.1794	1.00772	0.0982373	-3.34759
184	840	tr|Q4PMC2|Q4PMC2_IXOSC	N/A	N/A	Ribosomal protein S20 OS	Ixodes scapularis GN	TRUE	-27.8454	1.419e-07	469109	1.37624e+06	464098	1.37952e+06	60728.2	23606.2	-907133	0.340862	-0.467421	2.93374	1.55274
185	611	tr|A0A034WWP0|A0A034WWP0_RHIMP	N/A	N/A	ML domain-containing protein 1 (Fragment) OS	Rhipicephalus microplus PE	TRUE	27.6347	1.4848e-07	73658.2	9150.21	73669.9	10409.1	1706.05	4345.74	64508	8.04989	0.90579	0.124225	-3.00897
186	705	tr|L7M4U7|L7M4U7_9ACAR	N/A	N/A	Eukaryotic translation initiation factor 3 subunit F OS	Rhipicephalus pulchellus PE	TRUE	-27.1895	1.6356e-07	92900.2	167029	92758.3	165366	3937.53	3772.03	-74128.7	0.556192	-0.254775	1.79794	0.846344
187	601	tr|C9W1T1|C9W1T1_RHISA	N/A	N/A	Cement-like protein (Fragment) OS	Rhipicephalus sanguineus PE	TRUE	-27.1865	1.6367e-07	1.00061e+06	3.13614e+06	1.00111e+06	3.18446e+06	96064.9	124309	-2.13553e+06	0.319058	-0.496131	3.13423	1.64811
188	609	tr|Q6JVM9|Q6JVM9_RHIAP	N/A	N/A	Glutathione S-transferase OS	Rhipicephalus appendiculatus GN	TRUE	27.1486	1.6504e-07	964183	196574	974507	195887	54331.8	15678.5	767609	4.90493	0.690633	0.203877	-2.29423
189	334	tr|V9VL04|V9VL04_RHIMP	N/A	N/A	Serine protease inhibitor 6 RmS6 OS	Rhipicephalus microplus GN	TRUE	27.0875	1.6726e-07	1.13925e+06	491766	1.12691e+06	494853	42273.2	22326	647483	2.31665	0.36486	0.431658	-1.21204
190	989	tr|A0A1E1XU98|A0A1E1XU98_9ACAR	N/A	N/A	Cystatin OS	Amblyomma sculptum PE	TRUE	27.044	1.6887e-07	210036	16722.3	210408	13019.4	7157.37	12375.5	193313	12.5602	1.099	0.0796163	-3.65079
191	607	tr|A0A023GFY8|A0A023GFY8_9ACAR	N/A	N/A	Putative actin-binding cytoskeleton protein filamin (Fragment) OS	Amblyomma triste PE	TRUE	-26.6421	1.8463e-07	170895	272484	170921	274888	4963.4	5790.03	-101590	0.627172	-0.202613	1.59446	0.673067
192	469	tr|C9W1R6|C9W1R6_RHISA	N/A	N/A	Hematopoietic stem/progenitor cells protein-like protein OS	Rhipicephalus sanguineus PE	TRUE	-26.5974	1.8648e-07	101393	231764	99688	230448	4096.2	8906.49	-130371	0.437484	-0.359038	2.2858	1.1927
193	367	tr|A0A224ZBY8|A0A224ZBY8_9ACAR	N/A	N/A	Vitellogenin 3 OS	Rhipicephalus zambeziensis PE	TRUE	-26.4715	1.9183e-07	264283	586529	268417	585588	23344.1	6914.64	-322246	0.450588	-0.34622	2.21932	1.15012
194	34	tr|F1PCK2|F1PCK2_CANLF	N/A	N/A	Alpha-1-B glycoprotein OS	Canis lupus familiaris GN	TRUE	26.2523	2.0156e-07	4.98657e+06	755602	5.08296e+06	751935	318941	46624.4	4.23097e+06	6.59946	0.819509	0.151527	-2.72235
195	897	tr|A0A131XQ18|A0A131XQ18_9ACAR	N/A	N/A	Putative fatty acid-binding protein fabp (Fragment) OS	Hyalomma excavatum PE	TRUE	26.2251	2.0282e-07	1.1583e+06	403694	1.16171e+06	404070	57371.7	4507.92	754606	2.86925	0.457769	0.348523	-1.52068
196	15	tr|A0A034WXH7|A0A034WXH7_RHIMP	N/A	N/A	Vitellogenin 4 (Fragment) OS	Rhipicephalus microplus PE	TRUE	25.9961	2.1369e-07	1.37472e+07	4.4487e+06	1.36416e+07	4.48078e+06	708940	95769.7	9.29854e+06	3.09017	0.489982	0.323607	-1.62769
197	466	tr|L7MEN3|L7MEN3_9ACAR	N/A	N/A	Putative glycine rich protein (Fragment) OS	Rhipicephalus pulchellus PE	TRUE	25.9634	2.153e-07	1.07494e+07	4.84702e+06	1.07807e+07	4.87891e+06	436115	128573	5.90241e+06	2.21774	0.345911	0.450909	-1.14909
198	521	tr|R4JQY0|R4JQY0_RHIMP	N/A	N/A	Calreticulin (Fragment) OS	Rhipicephalus microplus PE	TRUE	25.8521	2.2087e-07	109818	12655.5	107799	10376.1	5721.73	4874.79	97162	8.67744	0.938392	0.115241	-3.11727
199	207	tr|A0A023GME3|A0A023GME3_9ACAR	N/A	N/A	Putative vitellogenin-1 (Fragment) OS	Amblyomma triste PE	TRUE	25.7046	2.2852e-07	2.22668e+06	652339	2.22786e+06	627397	99918.3	70861.1	1.57434e+06	3.41338	0.533185	0.292965	-1.7712
200	680	tr|A0A224YNS0|A0A224YNS0_9ACAR	N/A	N/A	Serine protease inhibitor OS	Rhipicephalus zambeziensis PE	TRUE	25.6972	2.2892e-07	431592	254155	431786	258341	8931.75	10532.5	177436	1.69814	0.229974	0.588879	-0.763957
201	558	tr|A0A224Y9K2|A0A224Y9K2_9ACAR	N/A	N/A	Glycine rich superfamily member OS	Rhipicephalus zambeziensis PE	TRUE	25.6171	2.3321e-07	106628	29098.4	105804	29836.1	4573.44	3965.11	77529.7	3.6644	0.564003	0.272896	-1.87358
202	555	tr|G3MN41|G3MN41_9ACAR	N/A	N/A	Uncharacterized protein OS	Amblyomma maculatum PE	TRUE	-25.4068	2.4494e-07	369626	721251	370970	718636	20366.3	18744.9	-351625	0.51248	-0.290323	1.9513	0.964433
203	219	tr|A0A224YC84|A0A224YC84_9ACAR	N/A	N/A	Adducin OS	Rhipicephalus zambeziensis PE	TRUE	-25.3539	2.48e-07	604479	957565	606530	958738	23970.5	14184.1	-353086	0.631267	-0.199787	1.58412	0.663678
204	386	tr|L7M574|L7M574_9ACAR	N/A	N/A	Putative 60s ribosomal protein l13a OS	Rhipicephalus pulchellus PE	TRUE	-25.2822	2.5221e-07	761108	1.34559e+06	780605	1.35162e+06	42521.7	18158	-584480	0.565632	-0.247466	1.76793	0.822064
205	896	tr|A0A023FIT8|A0A023FIT8_9ACAR	N/A	N/A	Putative myosin regulatory light chain ixodes scapularis myosin regulatory light chain (Fragment) OS	Amblyomma cajennense PE	TRUE	25.2608	2.5349e-07	64689.7	26095.7	64205.7	26529.6	2017.73	2294.73	38594.1	2.47894	0.394267	0.403398	-1.30973
206	1078	tr|A0A131XL72|A0A131XL72_9ACAR	N/A	N/A	Amine oxidase OS	Hyalomma excavatum PE	TRUE	-25.0928	2.6375e-07	42316.9	213854	40902.6	212230	9549.1	9784.92	-171537	0.197877	-0.703604	5.05364	2.33732
207	564	tr|A0A224YTK8|A0A224YTK8_9ACAR	N/A	N/A	Mitochondrial 2-oxoglutarate/malate carrier protein OS	Rhipicephalus zambeziensis PE	TRUE	-24.9691	2.7162e-07	152006	500057	154845	494118	10572	25796.3	-348051	0.303977	-0.517159	3.28972	1.71796
208	25	tr|A0A131YL88|A0A131YL88_RHIAP	N/A	N/A	Alpha-1,4 glucan phosphorylase OS	Rhipicephalus appendiculatus PE	TRUE	-24.8709	2.7807e-07	821051	1.3352e+06	813225	1.34024e+06	35405.7	21350.8	-514145	0.614929	-0.211175	1.6262	0.701508
209	700	tr|A0A131YEN4|A0A131YEN4_RHIAP	N/A	N/A	TIL domain containing protein OS	Rhipicephalus appendiculatus PE	TRUE	24.6802	2.9109e-07	266138	24343.3	268628	29053.6	16463.5	10624.8	241794	10.9327	1.03873	0.091469	-3.45057
210	530	tr|A0A131YQ21|A0A131YQ21_RHIAP	N/A	N/A	Glutathione S-transferase OS	Rhipicephalus appendiculatus PE	TRUE	24.6389	2.9401e-07	472139	166485	465743	164383	22736.9	9929.93	305654	2.83593	0.452696	0.352618	-1.50382
211	1033	tr|Q3L6K7|Q3L6K7_9ACAR	N/A	N/A	Myosin alkali light chain protein OS	Haemaphysalis qinghaiensis PE	TRUE	-24.6194	2.954e-07	299632	519643	297881	519609	15897.6	8167.53	-220011	0.576611	-0.239117	1.73427	0.79433
212	41	tr|A0A224YK95|A0A224YK95_9ACAR	N/A	N/A	Creatine kinase OS	Rhipicephalus zambeziensis PE	TRUE	24.5747	2.9861e-07	52642.8	3065.73	52509.9	2658.31	3408.8	2158.63	49577.1	17.1714	1.2348	0.0582365	-4.10193
213	281	tr|C9W1B4|C9W1B4_RHISA	N/A	N/A	Hypothetical secreted protein (Fragment) OS	Rhipicephalus sanguineus PE	TRUE	24.5506	3.0035e-07	838076	339989	838194	341058	39237.1	10338.6	498087	2.46501	0.391818	0.405678	-1.30159
214	21	tr|L7M741|L7M741_9ACAR	N/A	N/A	Putative hydroxyacyl-coenzyme a dehydrogenase/3-ketoacyl-coenzyme a thiolase/enoyl-coenzyme a hydrat OS	Rhipicephalus pulchellus PE	TRUE	-24.477	3.0577e-07	898928	1.93917e+06	891729	1.932e+06	25599.8	81050.6	-1.04024e+06	0.463564	-0.333891	2.1572	1.10916
215	23	tr|F1PDJ5|F1PDJ5_CANLF	N/A	N/A	Apolipoprotein A-I OS	Canis lupus familiaris GN	TRUE	24.4267	3.0953e-07	2.00323e+07	2.19204e+06	2.01409e+07	2.18315e+06	1.46014e+06	41026.6	1.78402e+07	9.13863	0.960881	0.109426	-3.19198
216	425	tr|J9P9J6|J9P9J6_CANLF	N/A	N/A	Uncharacterized protein OS	Canis lupus familiaris PE	TRUE	24.3404	3.1612e-07	206250	24309.1	207781	24481	14328.7	4264.17	181941	8.48449	0.928626	0.117862	-3.08483
217	203	tr|A0A224Z6J6|A0A224Z6J6_9ACAR	N/A	N/A	Prohibitin OS	Rhipicephalus zambeziensis PE	TRUE	-24.1975	3.2738e-07	156287	290221	155562	291279	7620.73	8029.34	-133934	0.538511	-0.268805	1.85697	0.892952
218	161	tr|L7M706|L7M706_9ACAR	N/A	N/A	Putative oligomycin sensitivity-conferring protein OS	Rhipicephalus pulchellus PE	TRUE	-24.1885	3.2811e-07	1.1273e+06	2.0578e+06	1.14314e+06	2.05262e+06	51420.4	57230.3	-930500	0.547819	-0.261363	1.82542	0.868229
219	759	tr|A0A023FWX3|A0A023FWX3_9ACAR	N/A	N/A	Succinate dehydrogenase [ubiquinone] flavoprotein subunit, mitochondrial OS	Amblyomma parvum PE	TRUE	-24.1416	3.3192e-07	58595.4	116930	58309.1	116753	2940.53	3835.15	-58334.7	0.501115	-0.300063	1.99555	0.996787
220	124	tr|F1Q418|F1Q418_CANLF	N/A	N/A	Inter-alpha-trypsin inhibitor heavy chain 1 OS	Canis lupus familiaris GN	TRUE	24.0969	3.356e-07	909282	157230	923795	158315	57103.7	25205.3	752053	5.78315	0.762164	0.172916	-2.53185
221	285	tr|L7M4P3|L7M4P3_9ACAR	N/A	N/A	Putative dorsal switch protein 1 OS	Rhipicephalus pulchellus PE	TRUE	-24.0656	3.382e-07	267138	784689	266969	774689	25500	34637.6	-517551	0.340438	-0.467962	2.93739	1.55453
222	1065	tr|A0A131YXD4|A0A131YXD4_RHIAP	N/A	N/A	L-fuconate dehydratase OS	Rhipicephalus appendiculatus PE	TRUE	24.0174	3.4226e-07	80724.3	6943.72	80367.4	5495.48	1958.48	5823.42	73780.6	11.6255	1.06541	0.0860177	-3.53922
223	543	tr|A0A224Z2K0|A0A224Z2K0_9ACAR	N/A	N/A	Tropomyosin OS	Rhipicephalus zambeziensis PE	TRUE	23.9565	3.4746e-07	299800	101104	298371	100957	15796.9	5061.72	198696	2.96527	0.472064	0.337238	-1.56816
224	665	tr|A0A224YCG2|A0A224YCG2_9ACAR	N/A	N/A	Pancreatic trypsin inhibitor OS	Rhipicephalus zambeziensis PE	TRUE	23.9472	3.4826e-07	335830	59843.4	337052	65429.7	16274.8	16322.1	275986	5.61181	0.749103	0.178195	-2.48847
225	747	tr|F1Q184|F1Q184_CANLF	N/A	N/A	Uncharacterized protein OS	Canis lupus familiaris PE	TRUE	23.9122	3.513e-07	105981	17251.1	104189	16727	6560.2	3469.71	88729.4	6.14341	0.788409	0.162776	-2.61904
226	364	tr|E2R4V3|E2R4V3_CANLF	N/A	N/A	Serpin family F member 2 OS	Canis lupus familiaris GN	TRUE	23.8664	3.5533e-07	273052	38273.4	272883	38032.3	11537.5	15936.4	234779	7.13426	0.853349	0.140169	-2.83476
227	622	tr|A0A224YIQ8|A0A224YIQ8_9ACAR	N/A	N/A	Actin-related protein 2/3 complex subunit 5 OS	Rhipicephalus zambeziensis PE	TRUE	-23.7891	3.6226e-07	13858.3	153623	10970.1	154696	9867.43	6380.03	-139765	0.0902094	-1.04475	11.0853	3.47058
228	675	tr|A0A131Z6W5|A0A131Z6W5_RHIAP	N/A	N/A	NADH dehydrogenase (Ubiquinone) 1 alpha subcomplex subunit 6 OS	Rhipicephalus appendiculatus PE	TRUE	-23.599	3.7995e-07	209298	358542	212509	356604	10898.3	6419.34	-149244	0.583748	-0.233774	1.71307	0.776582
229	138	tr|A0A224YL52|A0A224YL52_9ACAR	N/A	N/A	Calsequestrin OS	Rhipicephalus zambeziensis PE	TRUE	-23.5531	3.8437e-07	4665.31	37171.5	4766.45	36913.6	1851.28	2047.37	-32506.2	0.125508	-0.901329	7.96764	2.99415
230	879	tr|A0A131YTY2|A0A131YTY2_RHIAP	N/A	N/A	Aspartate aminotransferase OS	Rhipicephalus appendiculatus PE	TRUE	23.518	3.8779e-07	79336.5	29330	78318.1	29446.3	4212.32	583.954	50006.5	2.70496	0.432161	0.369691	-1.43561
231	436	tr|A0A224YCQ3|A0A224YCQ3_9ACAR	N/A	N/A	Lipocalin (Fragment) OS	Rhipicephalus zambeziensis PE	TRUE	23.4683	3.927e-07	3.28469e+06	1.73955e+06	3.27136e+06	1.74852e+06	129217	25346.1	1.54514e+06	1.88824	0.276058	0.529593	-0.917043
232	13	tr|A0A131YSR5|A0A131YSR5_RHIAP	N/A	N/A	Vitellogenin B OS	Rhipicephalus appendiculatus PE	TRUE	23.4385	3.9568e-07	1.36859e+06	800610	1.36048e+06	804523	40700	26314.2	567981	1.70944	0.232853	0.584988	-0.77352
233	886	tr|A0A224YRN6|A0A224YRN6_9ACAR	N/A	N/A	2,3-bisphosphoglycerate-independent phosphoglycerate mutase OS	Rhipicephalus zambeziensis PE	TRUE	23.3603	4.0362e-07	84342.8	2607.81	81542.9	2698.15	6945.91	850.444	81735	32.3423	1.50977	0.0309192	-5.01535
234	329	tr|F1P7J4|F1P7J4_CANLF	N/A	N/A	Complement C5 OS	Canis lupus familiaris GN	TRUE	23.3368	4.0604e-07	303314	70667.9	298451	72898	18527.6	7366.01	232646	4.2921	0.63267	0.232986	-2.10168
235	960	tr|L7LQQ6|L7LQQ6_9ACAR	N/A	N/A	Putative microplusin-like antibacteral peptide OS	Rhipicephalus pulchellus PE	TRUE	23.3211	4.0766e-07	161060	39661.3	159253	41838.4	4050.06	9591.02	121399	4.0609	0.608622	0.246251	-2.0218
236	145	tr|L7MAZ4|L7MAZ4_9ACAR	N/A	N/A	3-hydroxyisobutyryl-CoA hydrolase, mitochondrial OS	Rhipicephalus pulchellus PE	TRUE	-23.3027	4.0958e-07	937930	1.3891e+06	939295	1.38847e+06	27161.6	27598.2	-451167	0.675208	-0.170562	1.48102	0.566595
237	540	tr|A0A224Y3J9|A0A224Y3J9_9ACAR	N/A	N/A	Glutathione S-transferase OS	Rhipicephalus zambeziensis PE	TRUE	23.2429	4.1588e-07	503777	222712	503411	222783	23319.8	6411.04	281065	2.26201	0.354494	0.442085	-1.1776
238	340	tr|F1PG16|F1PG16_CANLF	N/A	N/A	Uncharacterized protein OS	Canis lupus familiaris GN	TRUE	23.2359	4.1662e-07	208722	23771.4	207886	19004.8	3800.49	15459	184950	8.78037	0.943513	0.11389	-3.13428
239	38	tr|A0A224YXN0|A0A224YXN0_9ACAR	N/A	N/A	Elongation factor 1-alpha OS	Rhipicephalus zambeziensis PE	TRUE	-23.1281	4.283e-07	9.91405e+06	1.6631e+07	9.9997e+06	1.65474e+07	373096	445184	-6.71699e+06	0.596117	-0.224668	1.67752	0.746332
240	4	tr|F1PIX8|F1PIX8_CANLF	N/A	N/A	Complement C3 OS	Canis lupus familiaris GN	TRUE	22.9168	4.5231e-07	4.1203e+06	772930	4.10397e+06	809793	280277	82380.9	3.34737e+06	5.33075	0.726789	0.187591	-2.41434
241	113	tr|L7M1L5|L7M1L5_9ACAR	N/A	N/A	Citrate synthase OS	Rhipicephalus pulchellus PE	TRUE	-22.8905	4.554e-07	1.82917e+06	3.21439e+06	1.84379e+06	3.22057e+06	70044	98701.8	-1.38522e+06	0.569058	-0.244844	1.75729	0.813353
242	347	tr|A0A131Z3E9|A0A131Z3E9_RHIAP	N/A	N/A	40S ribosomal protein S6 OS	Rhipicephalus appendiculatus PE	TRUE	-22.6305	4.8736e-07	287991	729871	292721	728658	37617.7	10485.3	-441881	0.394577	-0.403868	2.53436	1.34162
243	810	tr|A0A131YMI2|A0A131YMI2_RHIAP	N/A	N/A	Aminocarboxymuconate-semialdehyde decarboxylase OS	Rhipicephalus appendiculatus PE	TRUE	22.5141	5.0253e-07	120969	53040.5	121225	52786.3	4532.88	3983.25	67928.8	2.2807	0.358067	0.438463	-1.18947
244	888	tr|L7M6Q8|L7M6Q8_9ACAR	N/A	N/A	Peptidyl-prolyl cis-trans isomerase OS	Rhipicephalus pulchellus PE	TRUE	22.4878	5.0603e-07	201640	76511.6	200475	76584.2	10176.2	4504.4	125128	2.63541	0.420848	0.379447	-1.39803
245	504	tr|A0A1E1XNG1|A0A1E1XNG1_9ACAR	N/A	N/A	Putative diacetyl reductase/l-xylulose reductase (Fragment) OS	Amblyomma sculptum PE	TRUE	22.3914	5.191e-07	2.07261e+06	914251	2.08878e+06	913637	103097	8714.2	1.15836e+06	2.267	0.355452	0.441111	-1.18079
246	331	tr|A0A131Z253|A0A131Z253_RHIAP	N/A	N/A	Amblyomma 40-33 family member OS	Rhipicephalus appendiculatus PE	TRUE	22.3179	5.2934e-07	612487	182359	608702	183220	32044.2	21422.7	430128	3.35868	0.526169	0.297736	-1.7479
247	488	tr|A0A131YV69|A0A131YV69_RHIAP	N/A	N/A	Serine carboxypeptidase OS	Rhipicephalus appendiculatus PE	TRUE	22.2424	5.401e-07	124368	12593.6	125325	13663.6	9651.74	2803.23	111774	9.87548	0.994558	0.101261	-3.30385
248	361	tr|G3MKS0|G3MKS0_9ACAR	N/A	N/A	Uncharacterized protein OS	Amblyomma maculatum PE	TRUE	22.1677	5.5099e-07	552168	301729	548462	300567	15219.3	16700.3	250439	1.83001	0.262454	0.546445	-0.871853
249	572	tr|L7M4W5|L7M4W5_9ACAR	N/A	N/A	60S ribosomal protein L13 OS	Rhipicephalus pulchellus PE	TRUE	-22.1414	5.5488e-07	395734	873762	392640	878209	11276.9	41680.9	-478028	0.452908	-0.34399	2.20795	1.14271
250	727	tr|A0A131YHK9|A0A131YHK9_RHIAP	N/A	N/A	Glutathione S-transferase OS	Rhipicephalus appendiculatus PE	TRUE	22.0753	5.6482e-07	220926	111053	221232	111911	7518.19	6524.3	109873	1.98937	0.298716	0.502671	-0.992313
251	732	tr|C9W1M1|C9W1M1_RHISA	N/A	N/A	Mitochondrial ATP synthase epsilon chain OS	Rhipicephalus sanguineus PE	TRUE	-21.9255	5.8812e-07	193439	309283	193449	307645	2205.56	10334.4	-115844	0.625442	-0.203813	1.59887	0.677052
252	66	tr|A0A224Z2Z6|A0A224Z2Z6_9ACAR	N/A	N/A	KSR 2 misexpression suppressor OS	Rhipicephalus zambeziensis PE	TRUE	-21.9181	5.893e-07	659328	955114	661739	952484	10719.5	24770.3	-295787	0.690313	-0.160954	1.44862	0.534678
253	346	tr|A0A131XEY6|A0A131XEY6_9ACAR	N/A	N/A	Uncharacterized protein OS	Hyalomma excavatum PE	TRUE	-21.8569	5.9916e-07	196266	429965	200128	431663	20813.8	4907.25	-233699	0.45647	-0.340587	2.19072	1.13141
254	296	tr|L7M6A8|L7M6A8_9ACAR	N/A	N/A	Putative ribosomal protein s23 OS	Rhipicephalus pulchellus PE	TRUE	-21.842	6.0159e-07	550660	1.44909e+06	554933	1.43255e+06	40536.8	71585.8	-898431	0.380004	-0.420212	2.63155	1.39592
255	182	tr|A0A224YG94|A0A224YG94_9ACAR	N/A	N/A	Phosphoglycerate kinase OS	Rhipicephalus zambeziensis PE	TRUE	-21.7798	6.1185e-07	1.03481e+06	1.5008e+06	1.03219e+06	1.50305e+06	37525.3	20565	-465989	0.689507	-0.161461	1.45031	0.536363
256	590	tr|L7ML89|L7ML89_9ACAR	N/A	N/A	40S ribosomal protein S26 (Fragment) OS	Rhipicephalus pulchellus PE	TRUE	-21.6931	6.2652e-07	419354	1.18864e+06	411045	1.18505e+06	58261.4	40446.1	-769284	0.352802	-0.452469	2.83445	1.50307
257	107	tr|A0A224YYZ8|A0A224YYZ8_9ACAR	N/A	N/A	Fructose-bisphosphate aldolase OS	Rhipicephalus zambeziensis PE	TRUE	-21.5886	6.4472e-07	4.15243e+06	6.03381e+06	4.11878e+06	6.03848e+06	145656	95722.7	-1.88138e+06	0.688193	-0.16229	1.45308	0.539115
258	537	tr|L7M7D4|L7M7D4_9ACAR	N/A	N/A	Putative nadh:ubiquinone oxidoreductase ndufv2/24 kd subunit OS	Rhipicephalus pulchellus PE	TRUE	-21.5571	6.5033e-07	102944	170583	104272	168869	3592.63	5145.18	-67639	0.603484	-0.219335	1.65705	0.728614
259	677	tr|L7M3F0|L7M3F0_9ACAR	N/A	N/A	Uncharacterized protein OS	Rhipicephalus pulchellus PE	TRUE	-21.4329	6.7301e-07	224395	451911	221366	453150	8559.83	19428.6	-227517	0.496545	-0.304041	2.01391	1.01
260	160	tr|L7M6S1|L7M6S1_9ACAR	N/A	N/A	Putative heat shock-related protein OS	Rhipicephalus pulchellus PE	TRUE	21.4176	6.7587e-07	1.49816e+06	1.01379e+06	1.4961e+06	1.00694e+06	38136.3	24320.1	484369	1.47778	0.169609	0.676691	-0.56343
261	85	tr|A0A131Z4L0|A0A131Z4L0_RHIAP	N/A	N/A	Glutathione S-transferase OS	Rhipicephalus appendiculatus PE	TRUE	21.3555	6.8761e-07	1.65524e+06	487519	1.66464e+06	520644	48338.7	98096.5	1.16772e+06	3.39522	0.530868	0.294532	-1.76351
262	606	sp|P49822|ALBU_CANLF	N/A	N/A	Serum albumin OS	Canis lupus familiaris GN	TRUE	21.3545	6.8781e-07	218220	40499.8	216938	40623.5	16620.4	901.021	177720	5.38817	0.731442	0.185592	-2.4298
263	720	tr|A0A023FM57|A0A023FM57_9ACAR	N/A	N/A	Putative tick serpins 14 OS	Amblyomma cajennense PE	TRUE	21.3198	6.9446e-07	113567	67751.4	113195	68982.4	1624.55	3979.05	45815.3	1.67623	0.224333	0.596578	-0.745218
264	126	tr|A0A131XPK7|A0A131XPK7_9ACAR	N/A	N/A	Putative basement membrane-specific heparan sulfate proteoglycan core protein (Fragment) OS	Hyalomma excavatum PE	TRUE	-21.3106	6.9625e-07	457887	822556	464054	827947	16484.4	29992.7	-364669	0.556664	-0.254407	1.79642	0.845122
265	613	tr|L7LYQ8|L7LYQ8_9ACAR	N/A	N/A	Putative glycine rich protein OS	Rhipicephalus pulchellus PE	TRUE	21.3043	6.9746e-07	81270.1	27123.6	81767.9	27604.8	4739.94	1836.11	54146.5	2.99629	0.476584	0.333746	-1.58318
266	97	tr|A0A224YYF6|A0A224YYF6_9ACAR	N/A	N/A	Guanine nucleotide-binding protein OS	Rhipicephalus zambeziensis PE	TRUE	-21.1281	7.3268e-07	1.0758e+06	2.02956e+06	1.06928e+06	2.02762e+06	71985.9	54490.2	-953764	0.530064	-0.275671	1.88656	0.91576
267	313	tr|L7LY05|L7LY05_9ACAR	N/A	N/A	Isocitrate dehydrogenase [NAD] subunit, mitochondrial OS	Rhipicephalus pulchellus PE	TRUE	-21.1042	7.3762e-07	71068	237082	70773.5	237449	6384.66	14379	-166014	0.299762	-0.523224	3.33598	1.73811
268	390	tr|A0A131XKX7|A0A131XKX7_9ACAR	N/A	N/A	Putative aconitase/aconitase aconitase superfamily OS	Hyalomma excavatum PE	TRUE	21.0766	7.4337e-07	153535	72870.2	154487	70644.9	2777.72	7132.71	80665.2	2.10697	0.323658	0.474615	-1.07517
269	908	tr|A0A131XGJ6|A0A131XGJ6_9ACAR	N/A	N/A	Putative m20 domain-containing peptidase (Fragment) OS	Hyalomma excavatum PE	TRUE	21.0657	7.4565e-07	63460.9	17486.5	64244.1	17271.1	3971.74	1810.33	45974.4	3.62914	0.559804	0.275547	-1.85963
270	454	tr|L7M666|L7M666_9ACAR	N/A	N/A	Putative small nuclear ribonucleoprotein sm d3 OS	Rhipicephalus pulchellus PE	TRUE	-20.9822	7.6341e-07	366233	513095	367493	511671	13250.8	4514.35	-146862	0.713772	-0.146441	1.40101	0.486465
271	517	tr|L7MDZ5|L7MDZ5_9ACAR	N/A	N/A	Putative neurofilament heavy polypeptide (Fragment) OS	Rhipicephalus pulchellus PE	TRUE	-20.9333	7.7406e-07	96680.8	230741	94180.5	233144	9341.27	8763.21	-134060	0.419002	-0.377784	2.38663	1.25497
272	206	tr|A0A224Z4W7|A0A224Z4W7_9ACAR	N/A	N/A	Myosin regulatory light chain ef hand protein superfamily OS	Rhipicephalus zambeziensis PE	TRUE	-20.8904	7.8352e-07	1.32334e+06	1.70222e+06	1.31899e+06	1.69397e+06	25637.8	25658.7	-378870	0.777425	-0.109341	1.2863	0.363224
273	437	tr|A0A224Z2T5|A0A224Z2T5_9ACAR	N/A	N/A	Large subunit ribosomal protein L3e OS	Rhipicephalus zambeziensis PE	TRUE	-20.8856	7.8459e-07	215701	373712	217785	378904	6619.88	13606.1	-158011	0.577186	-0.238685	1.73255	0.792893
274	617	tr|L7M456|L7M456_9ACAR	N/A	N/A	Transcription factor BTF3 OS	Rhipicephalus pulchellus PE	TRUE	-20.8448	7.9374e-07	81895.7	190700	81980.3	191565	2621.69	10104.9	-108804	0.429448	-0.367089	2.32857	1.21944
275	429	tr|A0A224Z2W7|A0A224Z2W7_9ACAR	N/A	N/A	Large subunit ribosomal protein LP1 OS	Rhipicephalus zambeziensis PE	TRUE	20.6937	8.2872e-07	551245	391601	545477	390043	14137.6	6179.87	159644	1.40767	0.148501	0.710394	-0.493309
276	74	tr|A0A224Z295|A0A224Z295_9ACAR	N/A	N/A	Protein disulfide-isomerase OS	Rhipicephalus zambeziensis PE	TRUE	-20.6765	8.3281e-07	1.09797e+06	1.40695e+06	1.09581e+06	1.40922e+06	28732.3	8226	-308976	0.780393	-0.107687	1.28141	0.357727
277	360	tr|L7LS09|L7LS09_9ACAR	N/A	N/A	Putative bitil peptide OS	Rhipicephalus pulchellus PE	TRUE	20.5956	8.524e-07	274572	142778	274245	142360	11533.5	5547.33	131794	1.92307	0.283994	0.520003	-0.943408
278	909	tr|E2R917|E2R917_CANLF	N/A	N/A	Keratin 75 OS	Canis lupus familiaris GN	TRUE	-20.4431	8.9078e-07	52004.8	84836.9	50931.6	84082.2	2286.52	2255.91	-32832.2	0.612997	-0.212542	1.63133	0.706048
279	379	tr|A0A224YRZ4|A0A224YRZ4_9ACAR	N/A	N/A	Isocitrate dehydrogenase [NAD] subunit, mitochondrial OS	Rhipicephalus zambeziensis PE	TRUE	-20.4366	8.9247e-07	55842.4	123724	55349.8	123676	2706.87	6066.69	-67881.9	0.451346	-0.345491	2.2156	1.1477
280	42	tr|A0A131Z680|A0A131Z680_RHIAP	N/A	N/A	Trifunctional purine biosynthetic protein adenosine-3 OS	Rhipicephalus appendiculatus PE	TRUE	20.4004	9.0188e-07	914731	533562	914761	517862	17678.3	32922.7	381169	1.71439	0.234108	0.5833	-0.777691
281	917	tr|A0A224Y9I2|A0A224Y9I2_9ACAR	N/A	N/A	Glycine rich superfamily member (Fragment) OS	Rhipicephalus zambeziensis PE	TRUE	-20.3378	9.1845e-07	15654.8	157453	15407	157860	10089.5	9625.22	-141798	0.0994254	-1.0025	10.0578	3.33024
282	181	tr|A0A131Z2K3|A0A131Z2K3_RHIAP	N/A	N/A	Uncharacterized protein OS	Rhipicephalus appendiculatus PE	TRUE	-20.1646	9.6619e-07	208132	319030	210770	320356	7918.28	7634.42	-110898	0.65239	-0.185493	1.53283	0.616193
283	736	tr|A0A131YLL6|A0A131YLL6_RHIAP	N/A	N/A	Toll-like receptor 5 OS	Rhipicephalus appendiculatus PE	TRUE	20.0668	9.9443e-07	87727.1	38204.9	87967.6	38218.1	4586.4	1823.88	49522.3	2.29623	0.361015	0.435496	-1.19927
284	645	tr|J9PAX5|J9PAX5_CANLF	N/A	N/A	Uncharacterized protein OS	Canis lupus familiaris PE	TRUE	20.0465	1.0004e-06	678321	73490.7	702966	72937.6	60234.4	3615.34	604831	9.23003	0.965203	0.108342	-3.20634
285	907	tr|A0A1E1X921|A0A1E1X921_9ACAR	N/A	N/A	Galectin OS	Amblyomma aureolatum PE	TRUE	-20.0428	1.0015e-06	300385	422670	302728	423021	7445.07	9668.03	-122286	0.710683	-0.148324	1.4071	0.492722
286	693	tr|A0A224YMH7|A0A224YMH7_9ACAR	N/A	N/A	Adenylate kinase OS	Rhipicephalus zambeziensis PE	TRUE	-19.994	1.0161e-06	141656	269632	141168	265457	2490.89	12556.8	-127976	0.525369	-0.279536	1.90342	0.928597
287	1070	tr|A0A224Y3W3|A0A224Y3W3_9ACAR	N/A	N/A	Glycine rich superfamily member OS	Rhipicephalus zambeziensis PE	TRUE	-19.9158	1.0399e-06	337633	3.38562e+06	373358	3.47168e+06	126887	278548	-3.04799e+06	0.0997253	-1.00119	10.0275	3.3259
288	250	tr|A0A224YSU8|A0A224YSU8_9ACAR	N/A	N/A	M20 domain containing peptidase OS	Rhipicephalus zambeziensis PE	TRUE	19.7743	1.0848e-06	223445	79199.4	220742	81152.4	12375.8	7725.58	144246	2.8213	0.450449	0.354447	-1.49636
289	341	tr|L7LXM2|L7LXM2_9ACAR	N/A	N/A	Uncharacterized protein OS	Rhipicephalus pulchellus PE	TRUE	-19.6727	1.1183e-06	166013	319856	163998	318012	13427.8	8019.38	-153843	0.519023	-0.284813	1.9267	0.946128
290	64	tr|A0A131YYA2|A0A131YYA2_RHIAP	N/A	N/A	Isocitrate dehydrogenase [NADP] OS	Rhipicephalus appendiculatus PE	TRUE	19.6382	1.13e-06	321286	157920	320803	156700	11356.6	12158.7	163365	2.03448	0.308454	0.491526	-1.02466
291	1076	tr|L7M3M1|L7M3M1_9ACAR	N/A	N/A	Putative ran-specific gtpase-activating protein OS	Rhipicephalus pulchellus PE	TRUE	-19.5549	1.1588e-06	56469.1	78936.2	56380.5	78973.8	508.081	2240.96	-22467	0.715377	-0.145465	1.39786	0.483224
292	291	tr|V5I1L1|V5I1L1_IXORI	N/A	N/A	Putative ribosomal protein l30 (Fragment) OS	Ixodes ricinus PE	TRUE	-19.5348	1.1659e-06	380676	1.0403e+06	388710	1.04972e+06	53908.8	40676.4	-659622	0.36593	-0.436602	2.73276	1.45036
293	651	tr|F1Q421|F1Q421_CANLF	N/A	N/A	Plasminogen OS	Canis lupus familiaris GN	TRUE	19.5313	1.1671e-06	174343	16503	175813	16505.2	15215.3	5452.56	157840	10.5643	1.02384	0.0946586	-3.40112
294	725	tr|A0A131YEJ6|A0A131YEJ6_RHIAP	N/A	N/A	Uncharacterized protein OS	Rhipicephalus appendiculatus PE	TRUE	19.528	1.1683e-06	2.01721e+06	500573	2.01373e+06	497617	147003	50170.8	1.51663e+06	4.0298	0.605283	0.248151	-2.01071
295	568	tr|L7M653|L7M653_9ACAR	N/A	N/A	Uncharacterized protein OS	Rhipicephalus pulchellus PE	TRUE	-19.467	1.1901e-06	837375	1.18184e+06	825947	1.17983e+06	32073.6	14956.7	-344463	0.708536	-0.149638	1.41136	0.497087
296	1057	tr|V5HV87|V5HV87_IXORI	N/A	N/A	Putative tnf receptor-associated factor 4 OS	Ixodes ricinus PE	TRUE	-19.4367	1.2011e-06	121144	400287	120466	403885	10099.1	26889.3	-279143	0.302642	-0.51907	3.30423	1.72431
297	541	tr|L7MAT6|L7MAT6_9ACAR	N/A	N/A	Putative peptide chain release factor 1 erf1 OS	Rhipicephalus pulchellus PE	TRUE	-19.4298	1.2037e-06	49245	160995	49028.8	157756	2174.14	11295.6	-111750	0.30588	-0.514449	3.26926	1.70896
298	883	tr|A0A131YU14|A0A131YU14_RHIAP	N/A	N/A	Dihydropyrimidinase OS	Rhipicephalus appendiculatus PE	TRUE	-19.4216	1.2067e-06	121655	163802	121732	163563	1302.88	4140.02	-42146.7	0.742697	-0.129188	1.34644	0.429154
299	263	tr|A0A224YGE4|A0A224YGE4_9ACAR	N/A	N/A	60s ribosomal protein l7a OS	Rhipicephalus zambeziensis PE	TRUE	-19.4089	1.2114e-06	768628	1.23696e+06	759913	1.23464e+06	36302.8	31798.5	-468337	0.621382	-0.206641	1.60932	0.686447
300	663	tr|V5HWG4|V5HWG4_IXORI	N/A	N/A	Putative rbp1-like protein OS	Ixodes ricinus PE	TRUE	-19.3535	1.232e-06	119947	296309	121579	293328	7105.54	16783.1	-176362	0.404804	-0.392755	2.47033	1.3047
301	679	tr|G3MQS2|G3MQS2_9ACAR	N/A	N/A	Uncharacterized protein OS	Amblyomma maculatum PE	TRUE	19.2742	1.2624e-06	382025	145072	383963	145721	24273.4	3918.83	236954	2.63335	0.420509	0.379744	-1.3969
302	22	tr|A0A131ZDX3|A0A131ZDX3_RHIAP	N/A	N/A	TIL domain containing protein (Fragment) OS	Rhipicephalus appendiculatus PE	TRUE	19.2628	1.2668e-06	1.10058e+06	722577	1.08849e+06	722552	36478.5	14479.6	378006	1.52314	0.182739	0.65654	-0.607045
303	889	tr|A0A224YML7|A0A224YML7_9ACAR	N/A	N/A	ADP-sugar pyrophosphatase / 8-oxo-dGDP phosphatase OS	Rhipicephalus zambeziensis PE	TRUE	19.2213	1.283e-06	419535	168909	408535	167093	25140.7	6928.23	250626	2.48379	0.395115	0.40261	-1.31254
304	274	tr|A0A224YPB5|A0A224YPB5_9ACAR	N/A	N/A	Heat shock protein OS	Rhipicephalus zambeziensis PE	TRUE	-19.0221	1.3646e-06	1.96196e+06	3.01425e+06	1.95827e+06	3.0029e+06	81546.8	74773.7	-1.05229e+06	0.650894	-0.18649	1.53635	0.619506
305	536	tr|L7LYW8|L7LYW8_9ACAR	N/A	N/A	Serine/threonine-protein phosphatase OS	Rhipicephalus pulchellus PE	TRUE	-19.0204	1.3653e-06	96122.7	168624	96066.2	170659	5079.72	5684.55	-72501.1	0.570042	-0.244093	1.75426	0.810859
306	798	tr|A0A023GKA4|A0A023GKA4_9ACAR	N/A	N/A	Putative ubiquinol cytochrome c reductase subunit qcr2 OS	Amblyomma triste PE	TRUE	-18.972	1.386e-06	64593.9	128272	65703.3	127674	3821.13	5519.19	-63678.2	0.503569	-0.297941	1.98582	0.989738
307	803	tr|L7MKF4|L7MKF4_9ACAR	N/A	N/A	Phosphoinositide phospholipase C (Fragment) OS	Rhipicephalus pulchellus PE	TRUE	-18.8292	1.4493e-06	773.728	13614	741.99	14154.8	318.898	1326.06	-12840.3	0.0568333	-1.2454	17.5953	4.13712
308	898	tr|A0A034WX82|A0A034WX82_RHIMP	N/A	N/A	Chitinase_1 OS	Rhipicephalus microplus PE	TRUE	18.6839	1.5173e-06	334964	205785	331935	205320	11709.9	7354.33	129179	1.62774	0.211584	0.614351	-0.702866
309	1023	tr|B7PTS0|B7PTS0_IXOSC	N/A	N/A	GMP reductase (Fragment) OS	Ixodes scapularis GN	TRUE	-18.6503	1.5335e-06	9014.32	23967.1	9027.42	23486.9	615.202	1480.78	-14952.8	0.376112	-0.424683	2.65878	1.41077
310	995	tr|A0A131YI91|A0A131YI91_RHIAP	N/A	N/A	Cuticle protein OS	Rhipicephalus appendiculatus PE	TRUE	18.6228	1.5469e-06	261992	173697	260352	172441	7973.52	5132.17	88294.7	1.50833	0.178495	0.662987	-0.592948
311	79	tr|L7M2C1|L7M2C1_9ACAR	N/A	N/A	Putative prohibitin OS	Rhipicephalus pulchellus PE	TRUE	-18.5728	1.5717e-06	943833	1.83556e+06	965810	1.83719e+06	89574.2	34600.3	-891724	0.514194	-0.288873	1.94479	0.959614
312	1005	tr|A0A224YR96|A0A224YR96_9ACAR	N/A	N/A	Tick serine protease OS	Rhipicephalus zambeziensis PE	TRUE	18.567	1.5746e-06	151525	14527.6	148919	12466.4	11885.4	8747.03	136998	10.4302	1.01829	0.0958757	-3.38269
313	557	tr|A0A224Z497|A0A224Z497_9ACAR	N/A	N/A	Microsomal triglyceride transfer protein large subunit OS	Rhipicephalus zambeziensis PE	TRUE	18.4093	1.656e-06	103867	52896.7	104647	52335.5	4022.17	3805.93	50969.9	1.96357	0.293047	0.509275	-0.973482
314	1058	tr|A0A147BF63|A0A147BF63_IXORI	N/A	N/A	Uncharacterized protein OS	Ixodes ricinus PE	TRUE	-18.3748	1.6745e-06	170161	493749	172995	489369	11937.5	33136.1	-323588	0.34463	-0.462647	2.90166	1.53688
315	733	tr|A0A224Z550|A0A224Z550_9ACAR	N/A	N/A	Nebulin repeat protein OS	Rhipicephalus zambeziensis PE	TRUE	-18.2774	1.7279e-06	102342	349747	113912	351954	25171.8	9964.32	-247405	0.292618	-0.533699	3.41743	1.77291
316	673	tr|A0A224Z7D1|A0A224Z7D1_9ACAR	N/A	N/A	Pyruvate dehydrogenase E1 component beta subunit OS	Rhipicephalus zambeziensis PE	TRUE	-18.2527	1.7418e-06	122442	177481	122040	177248	3784.43	4695.6	-55039.1	0.689887	-0.161222	1.44951	0.535568
317	726	tr|C9W1K5|C9W1K5_RHISA	N/A	N/A	Putative cement protein (Fragment) OS	Rhipicephalus sanguineus PE	TRUE	-18.105	1.8274e-06	9117.84	282663	8353.31	271242	6199.15	29575.1	-273546	0.0322569	-1.49138	31.0011	4.95425
318	848	tr|C9W1H9|C9W1H9_RHISA	N/A	N/A	NADH dehydrogenase 1 alpha subcomplex OS	Rhipicephalus sanguineus PE	TRUE	-18.1037	1.8281e-06	84517.3	113675	84386.9	114019	2585.75	1920.97	-29158	0.743497	-0.128721	1.34499	0.4276
319	687	tr|F1PNH6|F1PNH6_CANLF	N/A	N/A	Selenium binding protein 1 OS	Canis lupus familiaris GN	TRUE	17.9646	1.9134e-06	59129.2	13789.6	58385.3	14256.1	4252.57	2719.32	45339.7	4.28796	0.632251	0.233211	-2.10029
320	460	tr|H9GWG4|H9GWG4_CANLF	N/A	N/A	Inter-alpha-trypsin inhibitor heavy chain 3 OS	Canis lupus familiaris GN	TRUE	17.8736	1.9716e-06	112764	15944.9	112109	13176	6306.41	8809.03	96818.8	7.07208	0.849547	0.141401	-2.82214
321	1046	tr|A0A131YX63|A0A131YX63_RHIAP	N/A	N/A	Adenylosuccinate lyase OS	Rhipicephalus appendiculatus PE	TRUE	17.8234	2.0046e-06	86377.3	52899.3	86667.9	52785.2	3415.65	1563.86	33478	1.63286	0.21295	0.612421	-0.707405
322	760	tr|L7MAV8|L7MAV8_9ACAR	N/A	N/A	Putative cysteine desulfurase nfs1 OS	Rhipicephalus pulchellus PE	TRUE	17.7675	2.0421e-06	178200	92790.9	178824	91918.9	7493.61	6022.96	85409	1.92045	0.283402	0.520712	-0.941442
323	345	tr|A0A131YF77|A0A131YF77_RHIAP	N/A	N/A	Elongation factor 1-gamma OS	Rhipicephalus appendiculatus PE	TRUE	-17.7323	2.0661e-06	58614.1	89910.9	59335.7	89509.4	2391.13	2596.69	-31296.8	0.651913	-0.18581	1.53395	0.617248
324	783	tr|L7ME81|L7ME81_9ACAR	N/A	N/A	Putative phospholipase a2 (Fragment) OS	Rhipicephalus pulchellus PE	TRUE	-17.7169	2.0768e-06	90073.9	141445	91167.4	141761	5568.27	1619.9	-51371.1	0.636812	-0.195988	1.57032	0.65106
325	235	tr|A0A224Z5E7|A0A224Z5E7_9ACAR	N/A	N/A	Pyruvate dehydrogenase E1 component subunit alpha OS	Rhipicephalus zambeziensis PE	TRUE	-17.6937	2.0929e-06	250604	448933	255839	446159	16151.4	15546.8	-198329	0.558221	-0.253194	1.7914	0.841091
326	240	tr|L7M6Z0|L7M6Z0_9ACAR	N/A	N/A	Putative rap1a member of ras oncoprotein family OS	Rhipicephalus pulchellus PE	TRUE	-17.6934	2.0931e-06	581751	910542	583290	906717	34272.4	14376.1	-328791	0.638906	-0.194563	1.56518	0.646324
327	234	tr|A0A224YIC5|A0A224YIC5_9ACAR	N/A	N/A	4-hydroxyphenylpyruvate dioxygenase OS	Rhipicephalus zambeziensis PE	TRUE	-17.6628	2.1146e-06	512997	676126	515253	678445	13548.6	12555.1	-163129	0.75873	-0.119913	1.31799	0.398342
328	277	tr|L7M580|L7M580_9ACAR	N/A	N/A	Putative abc transporter OS	Rhipicephalus pulchellus PE	TRUE	17.657	2.1187e-06	64518.8	15284.2	64555.9	15320.9	1920.21	5235.77	49234.5	4.22126	0.625443	0.236896	-2.07768
329	778	tr|V5HCH2|V5HCH2_IXORI	N/A	N/A	Putative cell-matrix adhesion OS	Ixodes ricinus PE	TRUE	-17.6484	2.1248e-06	50161.2	185115	50171	190366	5100.04	14418.2	-134954	0.270972	-0.567075	3.69041	1.88378
330	51	tr|A0A224Z4Y6|A0A224Z4Y6_9ACAR	N/A	N/A	Protein disulfide-isomerase OS	Rhipicephalus zambeziensis PE	TRUE	-17.6298	2.1381e-06	1.17343e+06	1.65852e+06	1.17582e+06	1.64999e+06	40517.1	37238.8	-485088	0.707518	-0.150263	1.41339	0.499162
331	63	tr|L7M8R8|L7M8R8_9ACAR	N/A	N/A	Adenosylhomocysteinase OS	Rhipicephalus pulchellus PE	TRUE	17.5672	2.1834e-06	1.65952e+06	1.16635e+06	1.66183e+06	1.18252e+06	27483.2	48961	493174	1.42284	0.153155	0.702822	-0.508769
332	904	tr|A0A023G859|A0A023G859_9ACAR	N/A	N/A	Putative cysteine proteinase ixodes scapularis cysteine proteinase OS	Amblyomma triste PE	TRUE	-17.5007	2.2328e-06	407785	1.0649e+06	409955	1.04102e+06	32947	67482.5	-657117	0.382932	-0.416878	2.61143	1.38484
333	788	tr|A0A1E1X5Y9|A0A1E1X5Y9_9ACAR	N/A	N/A	Sorting nexin OS	Amblyomma aureolatum PE	TRUE	-17.4935	2.2382e-06	102441	158426	102807	157731	3863.72	5102.93	-55984.9	0.646619	-0.189352	1.54651	0.629012
334	121	tr|A0A224Z2M8|A0A224Z2M8_9ACAR	N/A	N/A	Isocitrate dehydrogenase [NADP] OS	Rhipicephalus zambeziensis PE	TRUE	17.4921	2.2393e-06	1.59128e+06	1.05301e+06	1.58149e+06	1.06342e+06	51537.1	33638.5	538262	1.51116	0.179311	0.661742	-0.595659
335	961	tr|J9P7F7|J9P7F7_CANLF	N/A	N/A	Uncharacterized protein OS	Canis lupus familiaris GN	TRUE	17.4507	2.2708e-06	156885	20607	153915	26429.5	9291.08	12554.5	136278	7.61317	0.881566	0.131351	-2.9285
336	209	tr|A0A131XI00|A0A131XI00_9ACAR	N/A	N/A	Putative enoyl-coa hydratase OS	Hyalomma excavatum PE	TRUE	-17.4327	2.2846e-06	938709	1.31542e+06	936701	1.32701e+06	20879.2	37840.6	-376709	0.71362	-0.146533	1.40131	0.486772
337	681	tr|A0A224Z254|A0A224Z254_9ACAR	N/A	N/A	Translation initiation inhibitor OS	Rhipicephalus zambeziensis PE	TRUE	17.4211	2.2937e-06	413640	246290	420081	251272	15470.4	11392.2	167350	1.67949	0.225176	0.595421	-0.748019
338	339	tr|A0A224YR66|A0A224YR66_9ACAR	N/A	N/A	Cytosolic ca2+ dependent cysteine protease OS	Rhipicephalus zambeziensis PE	TRUE	17.3182	2.3752e-06	548895	357696	553880	359305	19713.9	9945.94	191199	1.53453	0.185976	0.651665	-0.617798
339	389	tr|A0A224Z5T2|A0A224Z5T2_9ACAR	N/A	N/A	Peroxiredoxin (Alkyl hydroperoxide reductase subunit C) OS	Rhipicephalus zambeziensis PE	TRUE	-17.229	2.4486e-06	288687	412946	283670	412769	11701.1	8434.96	-124259	0.69909	-0.155467	1.43043	0.516449
340	190	tr|A0A224Z2T0|A0A224Z2T0_9ACAR	N/A	N/A	Purine nucleoside phosphorylase OS	Rhipicephalus zambeziensis PE	TRUE	17.2044	2.4693e-06	478872	260952	476308	261377	24131	7710.64	217919	1.83509	0.263658	0.544931	-0.875853
341	495	tr|L7MGQ7|L7MGQ7_9ACAR	N/A	N/A	Putative ribose 5-phosphate isomerase (Fragment) OS	Rhipicephalus pulchellus PE	TRUE	17.146	2.5194e-06	217025	143408	215128	141826	6679.56	5396.36	73616.5	1.51334	0.179935	0.660792	-0.597732
342	658	tr|A0A224YSP4|A0A224YSP4_9ACAR	N/A	N/A	S-(hydroxymethyl)glutathione dehydrogenase OS	Rhipicephalus zambeziensis PE	TRUE	-17.098	2.5613e-06	197114	270876	195411	271002	6748.59	5375.97	-73761.8	0.727692	-0.138053	1.37421	0.458601
343	852	tr|A0A131Z235|A0A131Z235_RHIAP	N/A	N/A	Carboxylic ester hydrolase OS	Rhipicephalus appendiculatus PE	TRUE	-17.0889	2.5694e-06	19021.2	73530.1	19169.3	74145.4	4831.05	4166.36	-54508.9	0.258686	-0.587227	3.86569	1.95073
344	10	tr|A0A131YWH0|A0A131YWH0_RHIAP	N/A	N/A	Tick thioester protein OS	Rhipicephalus appendiculatus PE	TRUE	16.9972	2.6522e-06	225799	153714	225842	153453	5462.07	6489.23	72085.1	1.46896	0.167009	0.680755	-0.554792
345	779	tr|A0A224YEB4|A0A224YEB4_9ACAR	N/A	N/A	Glycine rich superfamily member (Fragment) OS	Rhipicephalus zambeziensis PE	TRUE	16.9759	2.6718e-06	117259	12914.1	117811	11372.7	3311.01	11839	104345	9.07994	0.958083	0.110133	-3.18268
346	890	tr|A0A1E1X3P1|A0A1E1X3P1_9ACAR	N/A	N/A	Putative vacuolar h+-atpase v1 sector subunit a OS	Amblyomma aureolatum PE	TRUE	16.9542	2.692e-06	69686.2	11954.4	69334.9	12895.9	2096.11	6479.71	57731.7	5.82932	0.765618	0.171547	-2.54333
347	315	tr|A0A224YGV9|A0A224YGV9_9ACAR	N/A	N/A	Serine protease inhibitor OS	Rhipicephalus zambeziensis PE	TRUE	16.9449	2.7007e-06	1.08506e+06	526440	1.09671e+06	529400	49265.7	43819.1	558619	2.06113	0.314104	0.485172	-1.04343
348	90	tr|L7M9A4|L7M9A4_9ACAR	N/A	N/A	Putative 2-oxoglutarate dehydrogenase e1 subunit OS	Rhipicephalus pulchellus PE	TRUE	-16.84	2.8014e-06	355979	1.05065e+06	349664	1.04638e+06	80061.9	19918.7	-694672	0.338817	-0.470034	2.95144	1.56142
349	951	tr|L7M444|L7M444_9ACAR	N/A	N/A	Putative secreted protein OS	Rhipicephalus pulchellus PE	TRUE	16.7425	2.8989e-06	72253.5	27535.3	71706.5	26042.1	4011.74	3527.28	44718.2	2.62403	0.418969	0.381093	-1.39179
350	30	tr|A0A224Z659|A0A224Z659_9ACAR	N/A	N/A	Phosphoribosylaminoimidazolecarboxamide formyltransferase / IMP cyclohydrolase OS	Rhipicephalus zambeziensis PE	TRUE	16.7088	2.9335e-06	273483	158069	275846	157060	11353.5	7870.69	115415	1.73016	0.238085	0.577982	-0.790902
351	920	tr|A0A131Z382|A0A131Z382_RHIAP	N/A	N/A	Niemann-Pick C2 protein OS	Rhipicephalus appendiculatus PE	TRUE	16.6717	2.9722e-06	143438	6488.38	148235	6566.96	15796.3	4515.57	136950	22.107	1.34453	0.0452346	-4.46643
352	154	tr|A0A131YMB0|A0A131YMB0_RHIAP	N/A	N/A	PDZ and LIM domain protein Zasp OS	Rhipicephalus appendiculatus PE	TRUE	-16.6654	2.9788e-06	418583	564345	418609	563412	12769.4	11955.7	-145762	0.741715	-0.129763	1.34823	0.431063
353	37	tr|G3MGQ1|G3MGQ1_9ACAR	N/A	N/A	Tubulin alpha chain (Fragment) OS	Amblyomma maculatum PE	TRUE	-16.5802	3.07e-06	5.71237e+06	8.08353e+06	5.76268e+06	8.07339e+06	270884	91821.1	-2.37116e+06	0.706668	-0.150785	1.41509	0.500896
354	47	tr|A0A0C5PNS0|A0A0C5PNS0_RHISA	N/A	N/A	60S acidic ribosomal protein P0 (Fragment) OS	Rhipicephalus sanguineus PE	TRUE	-16.3779	3.3001e-06	1.23481e+06	1.70003e+06	1.2379e+06	1.68965e+06	27131	49912.7	-465214	0.72635	-0.138854	1.37675	0.461264
355	640	tr|L7LZK9|L7LZK9_9ACAR	N/A	N/A	Putative translocon-associated complex trap delta subunit OS	Rhipicephalus pulchellus PE	TRUE	-16.3538	3.3288e-06	76572.1	200266	76721.1	199141	10054.1	11302.6	-123694	0.382352	-0.417537	2.61539	1.38703
356	232	tr|A0A1E1XJX4|A0A1E1XJX4_9ACAR	N/A	N/A	Putative secreted protein (Fragment) OS	Amblyomma sculptum PE	TRUE	16.2746	3.4253e-06	3.71523e+06	1.23722e+06	3.76759e+06	1.2557e+06	294787	76393.6	2.47801e+06	3.00289	0.47754	0.333012	-1.58635
357	405	tr|A0A224YMM2|A0A224YMM2_9ACAR	N/A	N/A	Cytochrome b5 OS	Rhipicephalus zambeziensis PE	TRUE	-16.2585	3.4453e-06	208337	400705	209294	394385	14411.3	18769.4	-192369	0.519925	-0.284059	1.92335	0.943624
358	444	tr|A0A224Z4T4|A0A224Z4T4_9ACAR	N/A	N/A	Sodium/potassium-transporting ATPase subunit beta OS	Rhipicephalus zambeziensis PE	TRUE	-16.1296	3.6105e-06	479451	583496	478362	584232	11154.7	6481.48	-104045	0.821687	-0.0852933	1.21701	0.283338
359	105	tr|A0A131YMS3|A0A131YMS3_RHIAP	N/A	N/A	Aldehyde dehydrogenase (NAD+) OS	Rhipicephalus appendiculatus PE	TRUE	16.1275	3.6133e-06	3.06232e+06	1.67573e+06	3.07236e+06	1.68079e+06	170121	25039.8	1.38659e+06	1.82745	0.261846	0.54721	-0.869834
360	634	tr|A0A1E1X3F7|A0A1E1X3F7_9ACAR	N/A	N/A	Putative aromatic amino acid hydroxylase OS	Amblyomma aureolatum PE	TRUE	-16.1114	3.6345e-06	19661.9	109406	21525.5	105600	7143.57	8548.7	-89744.5	0.179714	-0.745417	5.56438	2.47622
361	8	tr|A0A224Z539|A0A224Z539_9ACAR	N/A	N/A	Neurexin iii alpha (Fragment) OS	Rhipicephalus zambeziensis PE	TRUE	-16.0225	3.7547e-06	1.29508e+06	1.49278e+06	1.29678e+06	1.48973e+06	18387.9	16458	-197699	0.867563	-0.0616988	1.15265	0.204959
362	2	tr|A0A131YQK6|A0A131YQK6_RHIAP	N/A	N/A	Titin OS	Rhipicephalus appendiculatus PE	TRUE	-15.9981	3.7885e-06	1.10214e+06	1.39562e+06	1.1037e+06	1.38262e+06	11925	34698.2	-293488	0.789709	-0.102533	1.26629	0.340608
363	278	tr|J9NSS7|J9NSS7_CANLF	N/A	N/A	Leucine rich alpha-2-glycoprotein 1 OS	Canis lupus familiaris GN	TRUE	15.9551	3.8489e-06	820893	195225	809221	219837	33720.2	70809.6	625668	4.20486	0.623752	0.23782	-2.07206
364	927	tr|A0A023GPB5|A0A023GPB5_9ACAR	N/A	N/A	Putative conserved membrane protein OS	Amblyomma triste PE	TRUE	15.9427	3.8666e-06	166200	11828.1	171345	12169.2	18561.9	5522.36	154372	14.0513	1.14772	0.0711676	-3.81264
365	826	tr|A0A131XF26|A0A131XF26_9ACAR	N/A	N/A	Dihydrolipoamide acetyltransferase component of pyruvate dehydrogenase complex OS	Hyalomma excavatum PE	TRUE	-15.925	3.8919e-06	132110	194544	132206	195108	7404.89	2578.46	-62433.7	0.679076	-0.168082	1.47259	0.558355
366	238	tr|D0E0G4|D0E0G4_RHISA	N/A	N/A	Putative chitinase OS	Rhipicephalus sanguineus PE	TRUE	15.8782	3.9598e-06	216022	109988	211425	110522	12290	5228.37	106034	1.96405	0.293152	0.509152	-0.973831
367	175	tr|A0A224YQW1|A0A224YQW1_9ACAR	N/A	N/A	Serine protease inhibitor OS	Rhipicephalus zambeziensis PE	TRUE	15.8103	4.0609e-06	1.25573e+06	308304	1.24462e+06	271705	47961.2	109835	947429	4.07303	0.609918	0.245517	-2.0261
368	839	tr|A0A131XL14|A0A131XL14_9ACAR	N/A	N/A	Putative 5' nucleotidase family OS	Hyalomma excavatum PE	TRUE	15.7635	4.1322e-06	176319	100830	177944	101003	9164.76	2782.05	75489	1.74868	0.242709	0.571861	-0.806263
369	1020	tr|A0A034WTS6|A0A034WTS6_RHIMP	N/A	N/A	Vitellogenin 2 OS	Rhipicephalus microplus PE	TRUE	15.7142	4.209e-06	90612.8	15540.3	89173.7	19671.6	4357.79	8503.11	75072.5	5.83084	0.765731	0.171502	-2.5437
370	777	tr|L7MBE1|L7MBE1_9ACAR	N/A	N/A	Putative ixoderin OS	Rhipicephalus pulchellus PE	TRUE	-15.579	4.428e-06	14719.9	38073.1	14838.2	37401.2	416.352	2968.98	-23353.2	0.386622	-0.412713	2.5865	1.371
371	865	tr|A0A131XAM3|A0A131XAM3_9ACAR	N/A	N/A	Putative secreted salivary gland peptide OS	Hyalomma excavatum PE	TRUE	15.5536	4.4707e-06	137094	4430.99	132712	4915.27	16891.6	2382.78	132663	30.9399	1.49052	0.0323207	-4.9514
372	850	tr|A0A147BVC5|A0A147BVC5_IXORI	N/A	N/A	Putative aconitase/aconitase aconitase superfamily protein (Fragment) OS	Ixodes ricinus PE	TRUE	-15.5128	4.5403e-06	135552	266169	134400	262738	9524.42	13887.6	-130617	0.509272	-0.29305	1.96359	0.973492
373	421	tr|C9W1I2|C9W1I2_RHISA	N/A	N/A	Putative beta thymosin OS	Rhipicephalus sanguineus PE	TRUE	15.5041	4.5553e-06	648547	239148	658166	243869	50371.3	15868.9	409399	2.71191	0.433275	0.368744	-1.43931
374	535	tr|L7M7Z9|L7M7Z9_9ACAR	N/A	N/A	Putative cytochrome c1 OS	Rhipicephalus pulchellus PE	TRUE	-15.475	4.6058e-06	83404.8	149609	82949.5	150889	5781.42	6307.56	-66204.1	0.557485	-0.253767	1.79377	0.842994
375	756	tr|L7M136|L7M136_9ACAR	N/A	N/A	Beta-galactosidase OS	Rhipicephalus pulchellus PE	TRUE	15.4638	4.6253e-06	204114	97124.1	205816	96893.7	6599.68	12162.2	106990	2.10158	0.322546	0.475832	-1.07147
376	196	tr|A0A224YID5|A0A224YID5_9ACAR	N/A	N/A	40S ribosomal protein S7 OS	Rhipicephalus zambeziensis PE	TRUE	-15.4424	4.6631e-06	822295	1.28147e+06	822143	1.30502e+06	10176.1	58592.2	-459175	0.641681	-0.192681	1.55841	0.640072
377	213	tr|Q4PM14|Q4PM14_IXOSC	N/A	N/A	Ribosomal protein L31 (Fragment) OS	Ixodes scapularis GN	TRUE	-15.3675	4.7982e-06	500932	954543	508474	960919	33833.6	48378.3	-453612	0.524787	-0.280017	1.90554	0.930197
378	542	tr|A0A131XMF7|A0A131XMF7_9ACAR	N/A	N/A	Alpha-1,4 glucan phosphorylase (Fragment) OS	Hyalomma excavatum PE	TRUE	-15.3143	4.8969e-06	381092	526945	380565	527484	16967.9	8655.48	-145853	0.72321	-0.140736	1.38272	0.467514
379	46	tr|L7M8Y4|L7M8Y4_9ACAR	N/A	N/A	Malate dehydrogenase OS	Rhipicephalus pulchellus PE	TRUE	15.3035	4.9172e-06	1.83375e+06	1.41345e+06	1.82062e+06	1.42082e+06	39888.2	37764.9	420306	1.29736	0.113061	0.770795	-0.375581
380	502	tr|Q86G64|Q86G64_DERVA	N/A	N/A	40S ribosomal protein S5 OS	Dermacentor variabilis PE	TRUE	-15.2452	5.0284e-06	403649	658965	403084	673309	5829.94	32983.3	-255316	0.61255	-0.212859	1.63252	0.707101
381	98	tr|A0A131YVE7|A0A131YVE7_RHIAP	N/A	N/A	Calponin OS	Rhipicephalus appendiculatus PE	TRUE	15.2352	5.048e-06	2.96024e+06	1.69449e+06	2.96467e+06	1.69361e+06	94062.1	136975	1.26575e+06	1.74698	0.242289	0.572415	-0.804866
382	432	tr|A0A224YWJ9|A0A224YWJ9_9ACAR	N/A	N/A	Acetyltransferase component of pyruvate dehydrogenase complex OS	Rhipicephalus zambeziensis PE	TRUE	-15.2159	5.0856e-06	107613	210594	109427	209172	9878.92	9253.61	-102981	0.510997	-0.291581	1.95696	0.968612
383	332	tr|L7M8X5|L7M8X5_9ACAR	N/A	N/A	Putative cystathionine beta-lyases/cystathionine gamma-synthase OS	Rhipicephalus pulchellus PE	TRUE	15.2123	5.0927e-06	460405	78343.5	448335	78287	50134.4	3106.84	382061	5.87674	0.769137	0.170162	-2.55502
384	1064	tr|A0A131XJK0|A0A131XJK0_9ACAR	N/A	N/A	Putative nucleoside diphosphate-sugar hydrolase of the mutt nudix family OS	Hyalomma excavatum PE	TRUE	15.0857	5.3485e-06	65482.8	37263.8	65911.4	37504.7	3151.52	2015.98	28219	1.75728	0.24484	0.569062	-0.813342
385	354	tr|A0A131Z3P7|A0A131Z3P7_RHIAP	N/A	N/A	Biliverdin reductase / flavin reductase OS	Rhipicephalus appendiculatus PE	TRUE	15.0501	5.4232e-06	442432	249571	442185	246892	23352.3	10560.8	192862	1.77277	0.248653	0.564088	-0.826008
386	381	tr|A0A224YKA5|A0A224YKA5_9ACAR	N/A	N/A	Uncharacterized protein OS	Rhipicephalus zambeziensis PE	TRUE	-15.0356	5.4538e-06	583484	802426	583715	798722	21246.1	19918.8	-218942	0.72715	-0.138376	1.37523	0.459676
387	1067	tr|F6Y3P9|F6Y3P9_CANLF	N/A	N/A	Gelsolin OS	Canis lupus familiaris GN	TRUE	15.0193	5.4886e-06	36598.3	4276.08	37602.6	4670.77	4139.21	1179.85	32322.3	8.55885	0.932415	0.116838	-3.09742
388	696	tr|L7LTA8|L7LTA8_9ACAR	N/A	N/A	Putative group ii salivary lipocalin OS	Rhipicephalus pulchellus PE	TRUE	-14.9851	5.5625e-06	92128.6	147218	92056.3	146269	5162.77	5235.02	-55089.3	0.625797	-0.203566	1.59796	0.676233
389	214	tr|A0A224Z2G3|A0A224Z2G3_9ACAR	N/A	N/A	Troponin T fast skeletal muscle OS	Rhipicephalus zambeziensis PE	TRUE	-14.941	5.6596e-06	638994	2.05504e+06	645086	2.04778e+06	26610.8	187675	-1.41605e+06	0.310939	-0.507324	3.21606	1.68529
390	660	tr|L7MEG1|L7MEG1_9ACAR	N/A	N/A	Putative selenophosphate synthetase (Fragment) OS	Rhipicephalus pulchellus PE	TRUE	-14.8157	5.9459e-06	221069	306601	220310	308300	10474.3	4858.23	-85532.2	0.721031	-0.142046	1.3869	0.471867
391	916	tr|G3MLU9|G3MLU9_9ACAR	N/A	N/A	Uncharacterized protein OS	Amblyomma maculatum PE	TRUE	14.7951	5.9946e-06	165848	68327.1	165702	67734.8	12867.3	2867.49	97521.3	2.42727	0.385118	0.411985	-1.27933
392	523	tr|A0A224ZAU6|A0A224ZAU6_9ACAR	N/A	N/A	Triosephosphate isomerase OS	Rhipicephalus zambeziensis PE	TRUE	14.7278	6.1568e-06	400038	271808	399447	273166	16307.3	6106.9	128230	1.47177	0.167839	0.679456	-0.557548
393	374	tr|A0A224Y5E8|A0A224Y5E8_9ACAR	N/A	N/A	Cubilin OS	Rhipicephalus zambeziensis PE	TRUE	14.7271	6.1586e-06	340115	242878	343239	242171	12130.3	5218.5	97236.7	1.40035	0.146237	0.714107	-0.485789
394	16	tr|A0A224YPA7|A0A224YPA7_9ACAR	N/A	N/A	Heat shock 70kDa protein 1/8 OS	Rhipicephalus zambeziensis PE	TRUE	-14.7101	6.2004e-06	3.39377e+06	4.79056e+06	3.42964e+06	4.8105e+06	159721	102735	-1.39679e+06	0.708429	-0.149704	1.41157	0.497306
395	183	tr|L7M9N9|L7M9N9_9ACAR	N/A	N/A	Putative kh-type splicing regulatory protein OS	Rhipicephalus pulchellus PE	TRUE	-14.6489	6.3537e-06	353036	527239	348629	523362	21526.6	10113.1	-174203	0.669594	-0.174188	1.49344	0.578641
396	366	tr|A0A224YZ64|A0A224YZ64_9ACAR	N/A	N/A	Glycyl-tRNA synthetase OS	Rhipicephalus zambeziensis PE	TRUE	-14.6266	6.4106e-06	87203.2	172754	88811.6	170363	10008.8	6055.31	-85550.9	0.504782	-0.296896	1.98105	0.986268
397	376	tr|A0A131YRT7|A0A131YRT7_RHIAP	N/A	N/A	Salivary sulfotransferase OS	Rhipicephalus appendiculatus PE	TRUE	-14.6233	6.419e-06	102809	163173	104369	162305	6777.15	4714.79	-60364.1	0.630061	-0.200618	1.58715	0.666437
398	600	tr|A0A224Y664|A0A224Y664_9ACAR	N/A	N/A	Glycine rich superfamily member (Fragment) OS	Rhipicephalus zambeziensis PE	TRUE	14.6181	6.4325e-06	1.94067e+06	1.06547e+06	1.96006e+06	1.05507e+06	114293	35712.9	875206	1.82143	0.260412	0.549019	-0.865071
399	382	tr|A0A224YSE4|A0A224YSE4_9ACAR	N/A	N/A	ATP-dependent 6-phosphofructokinase OS	Rhipicephalus zambeziensis PE	TRUE	14.5746	6.5457e-06	103899	22228.7	104212	23829.3	8818.93	6915.8	81670.5	4.67409	0.669697	0.213945	-2.22469
400	461	tr|K7N8D7|K7N8D7_HAELO	N/A	N/A	Cuticular protein (Fragment) OS	Haemaphysalis longicornis PE	TRUE	-14.5648	6.5715e-06	251493	620387	272682	616703	46294.3	20562.8	-368894	0.405381	-0.392137	2.46682	1.30265
401	514	tr|A0A224YN39|A0A224YN39_9ACAR	N/A	N/A	Dihydrolipoyl dehydrogenase OS	Rhipicephalus zambeziensis PE	TRUE	-14.3966	7.0338e-06	164064	221796	163870	222764	6916.03	4060.99	-57731.7	0.739708	-0.13094	1.35189	0.434973
402	686	tr|L7M191|L7M191_9ACAR	N/A	N/A	Putative ubiquitin-conjugating enzyme e2 OS	Rhipicephalus pulchellus PE	TRUE	-14.3546	7.1552e-06	74211.8	89364.3	74187.3	88770.9	1033.02	1841.17	-15152.5	0.830441	-0.0806912	1.20418	0.26805
403	863	tr|L7ML39|L7ML39_9ACAR	N/A	N/A	Putative dna polymerase iii subunit gamma and tau (Fragment) OS	Rhipicephalus pulchellus PE	TRUE	14.3114	7.2824e-06	355879	145631	358420	145683	28887.5	5367.04	210248	2.4437	0.388049	0.409215	-1.28907
404	1042	tr|F1PTZ9|F1PTZ9_CANLF	N/A	N/A	Glyceraldehyde-3-phosphate dehydrogenase OS	Canis lupus familiaris GN	TRUE	14.1567	7.7606e-06	82461.7	28182	83720.9	28255.9	6337.18	4317.95	54279.6	2.92604	0.46628	0.341759	-1.54895
405	170	tr|A0A224YQG5|A0A224YQG5_9ACAR	N/A	N/A	Glutamine synthetase OS	Rhipicephalus zambeziensis PE	TRUE	-14.0765	8.0226e-06	1.52064e+06	2.99349e+06	1.56104e+06	2.99621e+06	137458	157786	-1.47285e+06	0.507982	-0.294151	1.96857	0.97715
406	528	tr|A0A224YY26|A0A224YY26_9ACAR	N/A	N/A	Glycine hydroxymethyltransferase OS	Rhipicephalus zambeziensis PE	TRUE	-14.0333	8.1679e-06	137179	288878	146011	291478	20716.7	6183.51	-151699	0.474869	-0.323426	2.10584	1.0744
407	3	tr|A0A131Z9Z9|A0A131Z9Z9_RHIAP	N/A	N/A	Heparan sulfate proteoglycan 2 (Fragment) OS	Rhipicephalus appendiculatus PE	TRUE	-13.9999	8.2827e-06	419372	611911	415557	614795	14256.1	23523.1	-192539	0.685348	-0.164089	1.45911	0.545091
408	973	tr|B7Q730|B7Q730_IXOSC	N/A	N/A	Cuticular protein, putative OS	Ixodes scapularis GN	TRUE	-13.9875	8.3254e-06	125641	189847	127842	190094	5731.9	7171.09	-64205.4	0.661803	-0.179271	1.51102	0.595525
409	326	tr|F6Y713|F6Y713_CANLF	N/A	N/A	Alpha-1-acid glycoprotein OS	Canis lupus familiaris GN	TRUE	13.946	8.4714e-06	411269	92386	424086	95754.9	42074.7	17917.7	318883	4.45163	0.648519	0.224637	-2.15433
410	602	tr|L7M9B9|L7M9B9_9ACAR	N/A	N/A	Putative amblyomma 40-33 family member OS	Rhipicephalus pulchellus PE	TRUE	-13.8857	8.6885e-06	1.99515e+06	2.61519e+06	1.99482e+06	2.59334e+06	51498.8	72961.4	-620036	0.762909	-0.117527	1.31077	0.390416
411	428	tr|L7M4P7|L7M4P7_9ACAR	N/A	N/A	Putative vesicle coat complex copii gtpase subunit sar1 OS	Rhipicephalus pulchellus PE	TRUE	-13.871	8.7426e-06	265104	401338	266552	401455	11850.2	15666	-136234	0.66055	-0.180094	1.51389	0.59826
412	396	tr|L7MAQ6|L7MAQ6_9ACAR	N/A	N/A	Protein arginine methyltransferase NDUFAF7 OS	Rhipicephalus pulchellus PE	TRUE	-13.8703	8.745e-06	260047	391295	265107	390929	18227.8	5089.42	-131248	0.66458	-0.177453	1.50471	0.589486
413	426	tr|A0A224Z6W7|A0A224Z6W7_9ACAR	N/A	N/A	Ribosomal protein s17 OS	Rhipicephalus zambeziensis PE	TRUE	-13.8599	8.7835e-06	284608	429821	281273	426693	18980.7	8878.14	-145213	0.662154	-0.179041	1.51022	0.59476
414	473	tr|A0A131YR14|A0A131YR14_RHIAP	N/A	N/A	Splicing factor, proline-and glutamine-rich OS	Rhipicephalus appendiculatus PE	TRUE	-13.849	8.8239e-06	221787	327783	223696	330253	13498.9	7217.75	-105996	0.676627	-0.16965	1.47792	0.563567
415	880	tr|L7MIL3|L7MIL3_9ACAR	N/A	N/A	Putative aldehyde dehydrogenase (Fragment) OS	Rhipicephalus pulchellus PE	TRUE	-13.7169	9.3318e-06	143757	255195	145541	257922	11117.8	11849	-111438	0.563323	-0.249243	1.77518	0.827967
416	93	tr|A0A131YFY5|A0A131YFY5_RHIAP	N/A	N/A	Glutathione S-transferase OS	Rhipicephalus appendiculatus PE	TRUE	13.6987	9.4043e-06	3.16311e+06	2.01131e+06	3.16971e+06	1.99633e+06	148888	78170.1	1.1518e+06	1.57266	0.196635	0.635865	-0.653208
417	671	tr|L7MCC0|L7MCC0_9ACAR	N/A	N/A	Putative heat shock protein (Fragment) OS	Rhipicephalus pulchellus PE	TRUE	13.6321	9.6758e-06	193543	121114	191828	121957	9737.09	4255.07	72428.8	1.59802	0.203582	0.625774	-0.676286
418	809	tr|L7M2W4|L7M2W4_9ACAR	N/A	N/A	Putative copper chaperone atox1 copper chaperone atox1 OS	Rhipicephalus pulchellus PE	TRUE	13.6294	9.6869e-06	80127.8	38329.9	82152.1	38562.2	5435.33	2841.95	41797.9	2.09048	0.320245	0.47836	-1.06383
419	485	tr|L7M673|L7M673_9ACAR	N/A	N/A	Putative trna selenocysteine 1-associated protein 1 OS	Rhipicephalus pulchellus PE	TRUE	13.5999	9.8101e-06	709571	427629	714009	430550	39149.6	13653.9	281942	1.65931	0.219929	0.602659	-0.730587
420	667	tr|M1H857|M1H857_RHIAP	N/A	N/A	Ferritin OS	Rhipicephalus appendiculatus GN	TRUE	13.4759	1.0348e-05	550018	309338	551203	305664	33276.9	12983.1	240680	1.77805	0.249943	0.562415	-0.830293
421	996	tr|A0A131YH18|A0A131YH18_RHIAP	N/A	N/A	Uncharacterized protein OS	Rhipicephalus appendiculatus PE	TRUE	-13.4502	1.0465e-05	28796.4	75623.1	29766.5	74478.1	5012.14	4833.39	-46826.7	0.380789	-0.419316	2.62613	1.39294
422	480	tr|A0A224YG13|A0A224YG13_9ACAR	N/A	N/A	2-hydroxyacyl-CoA lyase 1 OS	Rhipicephalus zambeziensis PE	TRUE	13.2978	1.1183e-05	165891	92804.8	164465	95067.2	9881.61	4814.74	73085.9	1.78752	0.252252	0.559433	-0.837961
423	764	tr|E2RS79|E2RS79_CANLF	N/A	N/A	Uncharacterized protein OS	Canis lupus familiaris GN	TRUE	13.2208	1.1568e-05	141640	25617.4	133828	25512.1	17490.7	1459.96	116023	5.52907	0.742652	0.180862	-2.46704
424	699	tr|A0A224ZAI3|A0A224ZAI3_9ACAR	N/A	N/A	Transforming growth factor-beta-induced protein OS	Rhipicephalus zambeziensis PE	TRUE	13.1998	1.1676e-05	132906	85903.9	133077	86492	5641.68	4346.18	47002.3	1.54715	0.189532	0.64635	-0.629613
425	970	tr|C9W1B5|C9W1B5_RHISA	N/A	N/A	Cystatin (Fragment) OS	Rhipicephalus sanguineus PE	TRUE	13.1942	1.1705e-05	56474.4	13929.7	57289.7	13356.9	5851.86	2710.18	42544.7	4.05423	0.607909	0.246656	-2.01943
426	808	tr|B7PNL8|B7PNL8_IXOSC	N/A	N/A	Cysteine proteinase, putative (Fragment) OS	Ixodes scapularis GN	TRUE	13.1502	1.1935e-05	311266	182368	311907	184284	17965.4	7846.07	128898	1.7068	0.232183	0.585891	-0.771295
427	1	tr|A0A224YT82|A0A224YT82_9ACAR	N/A	N/A	Filamin OS	Rhipicephalus zambeziensis PE	TRUE	-13.1467	1.1953e-05	1.11288e+06	1.78076e+06	1.1065e+06	1.77934e+06	98717.9	24048.5	-667886	0.624944	-0.204159	1.60014	0.678202
428	435	tr|L7M132|L7M132_9ACAR	N/A	N/A	Uncharacterized protein OS	Rhipicephalus pulchellus PE	TRUE	-13.1389	1.1994e-05	159922	279490	160641	278587	17681.6	4315.09	-119568	0.572193	-0.242457	1.74766	0.805426
429	246	tr|G3MIA4|G3MIA4_9ACAR	N/A	N/A	Uncharacterized protein (Fragment) OS	Amblyomma maculatum PE	TRUE	13.1251	1.2068e-05	678243	359653	670201	363883	34700.1	33951.1	318591	1.88583	0.275502	0.530271	-0.915199
430	321	tr|L7LYL1|L7LYL1_9ACAR	N/A	N/A	Eukaryotic translation initiation factor 3 subunit D OS	Rhipicephalus pulchellus PE	TRUE	-13.1238	1.2075e-05	59764.4	99107.9	59216.4	99257.7	4723.63	3692.75	-39343.4	0.603024	-0.219665	1.65831	0.729712
431	18	tr|A0A131YYS7|A0A131YYS7_RHIAP	N/A	N/A	ATP synthase subunit beta OS	Rhipicephalus appendiculatus PE	TRUE	-13.0186	1.2654e-05	9.0792e+06	1.75399e+07	8.96503e+06	1.76448e+07	1.265e+06	298724	-8.46074e+06	0.51763	-0.285981	1.93188	0.950007
432	253	tr|Q2V829|Q2V829_9ACAR	N/A	N/A	Troponin I protein OS	Rhipicephalus haemaphysaloides haemaphysaloides PE	TRUE	-12.9841	1.2851e-05	1.46017e+06	1.81106e+06	1.45782e+06	1.82243e+06	43087.8	32629.3	-350885	0.806254	-0.0935281	1.2403	0.310694
433	353	tr|L7M6A6|L7M6A6_9ACAR	N/A	N/A	Profilin OS	Rhipicephalus pulchellus PE	TRUE	-12.9327	1.3152e-05	640117	953349	632628	962655	29378.1	38514.9	-313232	0.671441	-0.172992	1.48933	0.574668
434	785	tr|L7M537|L7M537_9ACAR	N/A	N/A	Putative mitogen inducible protein product OS	Rhipicephalus pulchellus PE	TRUE	-12.8765	1.3489e-05	21016.4	42034	20976.9	42572.8	2243.87	2371.07	-21017.6	0.499985	-0.301043	2.00006	1.00004
435	749	tr|G3MN19|G3MN19_9ACAR	N/A	N/A	Uncharacterized protein OS	Amblyomma maculatum PE	TRUE	-12.8271	1.3794e-05	27053.7	213080	26723.5	213756	25517	13790.9	-186026	0.126965	-0.896316	7.87619	2.9775
436	763	tr|J9P4H9|J9P4H9_CANLF	N/A	N/A	Keratin 13 OS	Canis lupus familiaris GN	TRUE	-12.7569	1.4241e-05	64294.6	153822	64621	152945	4225.35	13384.8	-89527.1	0.417981	-0.378843	2.39245	1.25849
437	837	tr|A0A224YDI8|A0A224YDI8_9ACAR	N/A	N/A	Glycine rich superfamily member OS	Rhipicephalus zambeziensis PE	TRUE	12.7242	1.4455e-05	321196	170080	314598	171163	20936.8	11217.3	151115	1.88849	0.276115	0.529523	-0.917236
438	54	tr|A0A224Z095|A0A224Z095_9ACAR	N/A	N/A	Heat shock 70kDa protein 5 OS	Rhipicephalus zambeziensis PE	TRUE	12.7077	1.4564e-05	1.16141e+06	714164	1.16574e+06	717334	48743.7	50781.8	447248	1.62625	0.211188	0.61491	-0.701552
439	635	tr|E2QYU2|E2QYU2_CANLF	N/A	N/A	Clusterin OS	Canis lupus familiaris GN	TRUE	12.6014	1.5293e-05	125810	18399.2	125168	16015.5	13640.7	10224.7	107411	6.83778	0.834915	0.146246	-2.77353
440	1043	tr|L7LZG3|L7LZG3_9ACAR	N/A	N/A	Thiamine pyrophosphokinase OS	Rhipicephalus pulchellus PE	TRUE	-12.3743	1.6995e-05	23082	141372	22592.6	141916	16680.8	9341.88	-118290	0.163272	-0.787088	6.12475	2.61465
441	770	tr|A0A224YIW4|A0A224YIW4_9ACAR	N/A	N/A	NIPSNAP1 protein OS	Rhipicephalus zambeziensis PE	TRUE	12.2738	1.7819e-05	86533.3	54994.8	85424.7	54913.1	2903.67	4240.23	31538.5	1.57348	0.196861	0.635534	-0.65396
442	748	tr|L7M6D6|L7M6D6_9ACAR	N/A	N/A	Putative tpa exp: ubiquitin-protein ligase OS	Rhipicephalus pulchellus PE	TRUE	12.258	1.7952e-05	35032	5062.12	35816.4	4638.66	3954.03	2876.84	29969.9	6.92042	0.840132	0.1445	-2.79086
443	261	tr|J9PBN6|J9PBN6_CANLF	N/A	N/A	Uncharacterized protein OS	Canis lupus familiaris GN	TRUE	12.257	1.7961e-05	206207	47290.1	206019	48273.2	19419	17184.6	158917	4.36047	0.639533	0.229333	-2.12448
444	1002	tr|A0A023FM06|A0A023FM06_9ACAR	N/A	N/A	Putative glycine-rich cell wall structural protein (Fragment) OS	Amblyomma cajennense PE	TRUE	-12.1788	1.864e-05	7433.29	124484	7737.67	131800	5427.13	18440	-117050	0.059713	-1.22393	16.7468	4.06581
445	65	tr|A0A224YSR0|A0A224YSR0_9ACAR	N/A	N/A	Lipoprotein amino terminal region OS	Rhipicephalus zambeziensis PE	TRUE	12.1604	1.8804e-05	3.01922e+06	1.23456e+06	3.01618e+06	1.23093e+06	270567	113785	1.78466e+06	2.44558	0.388382	0.408901	-1.29018
446	404	tr|L7M7U4|L7M7U4_9ACAR	N/A	N/A	Proteasome subunit alpha type OS	Rhipicephalus pulchellus PE	TRUE	-12.1595	1.8812e-05	411317	526111	418644	525809	16774.3	8667.59	-114793	0.781807	-0.1069	1.27909	0.355115
447	626	tr|A0A131YW86|A0A131YW86_RHIAP	N/A	N/A	Fasciclin domain containing protein OS	Rhipicephalus appendiculatus PE	TRUE	-12.1375	1.901e-05	244608	389097	246138	392615	20712.4	11740.6	-144488	0.628657	-0.201586	1.59069	0.669656
448	252	tr|A0A131YIS0|A0A131YIS0_RHIAP	N/A	N/A	Chitin-binding protein OS	Rhipicephalus appendiculatus PE	TRUE	-12.0763	1.9576e-05	667449	867286	661165	856928	17470.8	28108.7	-199837	0.769583	-0.113744	1.2994	0.37785
449	654	tr|A0A224YSV1|A0A224YSV1_9ACAR	N/A	N/A	Alpha-L-fucosidase OS	Rhipicephalus zambeziensis PE	TRUE	12.0725	1.9611e-05	200894	56050.7	203361	55514.8	14756.8	18921.6	144843	3.58415	0.554386	0.279006	-1.84163
450	547	tr|A0A224ZAU9|A0A224ZAU9_9ACAR	N/A	N/A	Troponin I protein OS	Rhipicephalus zambeziensis PE	TRUE	-11.9788	2.0516e-05	89178.4	131330	89547.6	131005	4952.5	5000.15	-42151.4	0.679042	-0.168104	1.47266	0.558428
451	718	tr|L7M3F2|L7M3F2_9ACAR	N/A	N/A	Putative ribosomal protein l18 OS	Rhipicephalus pulchellus PE	TRUE	-11.9566	2.0738e-05	370314	735980	394037	742363	55301	26134.7	-365667	0.503157	-0.298297	1.98745	0.99092
452	491	tr|L7MF64|L7MF64_9ACAR	N/A	N/A	Putative wd40 domain protein (Fragment) OS	Rhipicephalus pulchellus PE	TRUE	-11.922	2.1088e-05	77345.1	207997	83156.7	208732	19332.9	10326.1	-130652	0.371856	-0.429625	2.68921	1.42718
453	510	tr|L7MA85|L7MA85_9ACAR	N/A	N/A	Putative calcium/calmodulin-dependent serine protein kinase/membrane-associated guanylate kinase OS	Rhipicephalus pulchellus PE	TRUE	-11.8553	2.1784e-05	29868.3	84968.2	30591.2	85663.9	8146.41	4476.67	-55099.9	0.351523	-0.454046	2.84477	1.50831
454	918	tr|A0A1E1X7S7|A0A1E1X7S7_9ACAR	N/A	N/A	Putative aldehyde dehydrogenase OS	Amblyomma aureolatum PE	TRUE	-11.7822	2.2578e-05	36092	68955.9	37263.9	68271	4538.82	3243.37	-32863.9	0.523407	-0.28116	1.91056	0.933995
455	117	tr|L7M4A5|L7M4A5_9ACAR	N/A	N/A	Peptidyl-prolyl cis-trans isomerase OS	Rhipicephalus pulchellus PE	TRUE	-11.7045	2.3458e-05	2.83015e+06	5.12241e+06	2.79756e+06	5.17508e+06	334430	203905	-2.29226e+06	0.552503	-0.257665	1.80994	0.855945
456	860	tr|A0A1E1X172|A0A1E1X172_9ACAR	N/A	N/A	Putative dosage compensation complex subunit mle OS	Amblyomma aureolatum PE	TRUE	11.695	2.3569e-05	931061	405197	934449	404071	89405.1	9700.45	525864	2.2978	0.361312	0.435199	-1.20025
457	744	tr|L7MBQ7|L7MBQ7_9ACAR	N/A	N/A	Putative plexins functional semaphorin receptor (Fragment) OS	Rhipicephalus pulchellus PE	TRUE	11.6148	2.4524e-05	143524	60194.7	141389	59410.3	13496.1	4872.96	83329.5	2.38433	0.377367	0.419405	-1.25359
458	750	tr|A0A224YX90|A0A224YX90_9ACAR	N/A	N/A	Oxidoreductase OS	Rhipicephalus zambeziensis PE	TRUE	-11.6024	2.4676e-05	86289	147511	87361.1	146161	7174.73	7739.14	-61221.7	0.584968	-0.232868	1.7095	0.773571
459	106	tr|A0A131ZAM9|A0A131ZAM9_RHIAP	N/A	N/A	Twitchin like (Fragment) OS	Rhipicephalus appendiculatus PE	TRUE	-11.5908	2.4819e-05	278875	697853	281994	675140	45800.1	55936.9	-418978	0.399618	-0.398355	2.50239	1.32331
460	101	tr|A0A224YRR9|A0A224YRR9_9ACAR	N/A	N/A	Insulin-like growth factor 2 mRNA-binding protein 1 OS	Rhipicephalus zambeziensis PE	TRUE	-11.5765	2.4996e-05	767290	1.15277e+06	746237	1.15034e+06	66354	5673.67	-385476	0.665608	-0.176782	1.50239	0.587256
461	861	tr|A0A023G7Y5|A0A023G7Y5_9ACAR	N/A	N/A	Putative conserved membrane protein OS	Amblyomma triste PE	TRUE	-11.5701	2.5077e-05	520303	1.36189e+06	525952	1.38749e+06	18537	144291	-841587	0.382045	-0.417886	2.61749	1.38819
462	915	tr|L7MK38|L7MK38_9ACAR	N/A	N/A	Putative similar to chymotrypsin-elastase inhibitor ixodidin (Fragment) OS	Rhipicephalus pulchellus PE	TRUE	11.5446	2.5398e-05	38063.1	6806.26	38326.9	7241.23	3279.52	4308.89	31256.8	5.59236	0.747595	0.178815	-2.48346
463	976	tr|A0A224Z7V2|A0A224Z7V2_9ACAR	N/A	N/A	Serum amyloid A protein OS	Rhipicephalus zambeziensis PE	TRUE	-11.5446	2.5398e-05	59022.3	124647	55215	123938	10652	3973.25	-65624.5	0.473516	-0.324665	2.11186	1.07851
464	1036	tr|A0A1E1X9K3|A0A1E1X9K3_9ACAR	N/A	N/A	Putative mitochondrial/plastidial beta-ketoacyl-acp reductase OS	Amblyomma aureolatum PE	TRUE	11.517	2.5751e-05	92877.7	26646.8	93622.6	30042.6	2884.09	11133.9	66230.9	3.48551	0.542267	0.286902	-1.80137
465	204	tr|A0A131XG98|A0A131XG98_9ACAR	N/A	N/A	Putative zinc-binding oxidoreductase OS	Hyalomma excavatum PE	TRUE	-11.4883	2.6124e-05	739610	1.03581e+06	745030	1.03543e+06	49123	15682.2	-296201	0.71404	-0.146278	1.40048	0.485924
466	365	tr|E2R081|E2R081_CANLF	N/A	N/A	Serpin family B member 10 OS	Canis lupus familiaris GN	TRUE	11.3889	2.7468e-05	289113	86671.3	290185	91932.4	23072.2	27046.8	202441	3.33574	0.523192	0.299784	-1.73801
467	233	tr|L7LWU5|L7LWU5_9ACAR	N/A	N/A	Putative microtubule associated complex OS	Rhipicephalus pulchellus PE	TRUE	-11.3883	2.7476e-05	812888	1.01687e+06	815092	1.02105e+06	32888.3	14200.2	-203982	0.799402	-0.0972345	1.25093	0.323006
468	300	tr|C9W1Q4|C9W1Q4_RHISA	N/A	N/A	Putative thyropin OS	Rhipicephalus sanguineus PE	TRUE	-11.3818	2.7567e-05	1.86391e+06	2.25825e+06	1.85696e+06	2.26684e+06	49816.2	48165.1	-394341	0.825378	-0.0833473	1.21157	0.276874
469	1050	tr|L7M4E9|L7M4E9_9ACAR	N/A	N/A	Inositol-1-monophosphatase OS	Rhipicephalus pulchellus PE	TRUE	11.3529	2.7975e-05	69668.1	24139	71130.5	23704.4	7079.04	3770.82	45529.1	2.88612	0.460314	0.346486	-1.52913
470	88	tr|L7MGI2|L7MGI2_9ACAR	N/A	N/A	Putative gmp synthase (Fragment) OS	Rhipicephalus pulchellus PE	TRUE	11.3399	2.816e-05	503377	327608	509621	330732	29787	8586.87	175768	1.53652	0.186538	0.650822	-0.619666
471	971	tr|B7S729|B7S729_RHISA	N/A	N/A	FREP A1 (Fragment) OS	Rhipicephalus sanguineus PE	TRUE	11.2985	2.8761e-05	58806.1	14779.9	58735	12310.8	2604.52	7345.21	44026.2	3.97878	0.59975	0.251333	-1.99233
472	299	tr|L7MDL8|L7MDL8_9ACAR	N/A	N/A	Uncharacterized protein (Fragment) OS	Rhipicephalus pulchellus PE	TRUE	11.2953	2.8807e-05	533977	449553	537543	448619	9467.74	11568.1	84424.2	1.1878	0.0747419	0.841895	-0.248287
473	410	tr|L7M549|L7M549_9ACAR	N/A	N/A	Putative fibrillarin OS	Rhipicephalus pulchellus PE	TRUE	-11.2816	2.9009e-05	229568	655629	210657	663692	71284.8	24971.1	-426062	0.350148	-0.455748	2.85593	1.51396
474	318	tr|A0A131XN28|A0A131XN28_9ACAR	N/A	N/A	Putative nadh-ubiquinone oxidoreductase ndufs3/30 kDa subunit OS	Hyalomma excavatum PE	TRUE	-11.2812	2.9015e-05	349459	606478	364322	605921	45530.8	1787.73	-257019	0.57621	-0.239419	1.73548	0.795333
475	9	tr|L7M2A4|L7M2A4_9ACAR	N/A	N/A	Putative alpha actinin OS	Rhipicephalus pulchellus PE	TRUE	-11.2806	2.9024e-05	2.55195e+06	3.31338e+06	2.55472e+06	3.35608e+06	86499.3	103646	-761429	0.770195	-0.113399	1.29837	0.376704
476	937	tr|A0A224YAN3|A0A224YAN3_9ACAR	N/A	N/A	Uncharacterized protein OS	Rhipicephalus zambeziensis PE	TRUE	-11.2513	2.9461e-05	27584.6	95961.6	31616.6	96014.5	12021	1795.85	-68377	0.287455	-0.541431	3.47881	1.79859
477	793	tr|A0A224YVU3|A0A224YVU3_9ACAR	N/A	N/A	Clavaminate synthase OS	Rhipicephalus zambeziensis PE	TRUE	-11.2234	2.9887e-05	49090.7	132458	45046.5	132656	14451	3445.24	-83367.4	0.370613	-0.43108	2.69823	1.43202
478	434	tr|L7MDE2|L7MDE2_9ACAR	N/A	N/A	Uncharacterized protein (Fragment) OS	Rhipicephalus pulchellus PE	TRUE	-11.1766	3.0614e-05	144266	199371	141812	201117	5354.14	8280.65	-55105.4	0.723604	-0.140499	1.38197	0.466728
479	228	tr|L7M9V8|L7M9V8_9ACAR	N/A	N/A	Putative proline and glutamine-rich splicing factor sfpq OS	Rhipicephalus pulchellus PE	TRUE	-11.173	3.0672e-05	466282	666207	471623	660994	31838.2	16341.7	-199925	0.699905	-0.154961	1.42876	0.514769
480	947	tr|L7MG92|L7MG92_9ACAR	N/A	N/A	Putative tick serine protease (Fragment) OS	Rhipicephalus pulchellus PE	TRUE	11.1349	3.1281e-05	133697	88021.6	133947	87660.1	7413.21	3514.05	45674.9	1.51891	0.181531	0.658369	-0.603032
481	811	tr|L7M5H2|L7M5H2_9ACAR	N/A	N/A	Uncharacterized protein OS	Rhipicephalus pulchellus PE	TRUE	-11.0632	3.2465e-05	24074.6	37588.3	24072.6	37557	1268.55	2087.82	-13513.7	0.640482	-0.193493	1.56132	0.64277
482	167	tr|L7M5R1|L7M5R1_9ACAR	N/A	N/A	Proteasome subunit alpha type OS	Rhipicephalus pulchellus PE	TRUE	11.0587	3.2542e-05	418656	303652	420045	302824	19440.5	7392.87	115003	1.37873	0.13948	0.725304	-0.463342
483	513	tr|L7M2D4|L7M2D4_9ACAR	N/A	N/A	NAD-dependent protein deacylase OS	Rhipicephalus pulchellus PE	TRUE	-10.9804	3.3899e-05	70073.6	110278	70494.9	110687	4931.56	5413.29	-40204	0.635429	-0.196933	1.57374	0.654197
484	945	tr|L7MJ59|L7MJ59_9ACAR	N/A	N/A	Putative glycosylphosphatidylinositol anchor synthesis protein (Fragment) OS	Rhipicephalus pulchellus PE	TRUE	-10.9107	3.5164e-05	153520	205979	154227	205735	6592.96	7000.08	-52458.7	0.74532	-0.127657	1.34171	0.424068
485	91	tr|A0A224Z4V4|A0A224Z4V4_9ACAR	N/A	N/A	Calponin OS	Rhipicephalus zambeziensis PE	TRUE	10.8653	3.6016e-05	8.46128e+06	6.71059e+06	8.50229e+06	6.70802e+06	304967	104131	1.7507e+06	1.26089	0.100676	0.793093	-0.334438
486	573	tr|A0A131X8J9|A0A131X8J9_9ACAR	N/A	N/A	Putative glutathione s-transferase OS	Hyalomma excavatum PE	TRUE	10.7941	3.7402e-05	924066	441938	934765	469219	50859.3	73440.3	482128	2.09094	0.320342	0.478254	-1.06415
487	255	tr|A0A224Z1V2|A0A224Z1V2_9ACAR	N/A	N/A	Uncharacterized protein OS	Rhipicephalus zambeziensis PE	TRUE	10.6763	3.9834e-05	340370	249682	343098	250505	10240.1	13555.7	90688.5	1.36322	0.134565	0.733559	-0.447015
488	851	tr|F1P8L7|F1P8L7_CANLF	N/A	N/A	Rab GDP dissociation inhibitor OS	Canis lupus familiaris GN	TRUE	10.6673	4.0027e-05	13671.1	999.789	14553.2	1109.48	2305.45	573.553	12671.3	13.674	1.13589	0.0731317	-3.77336
489	333	tr|A0A224YWT9|A0A224YWT9_9ACAR	N/A	N/A	Gamma-glutamyltranspeptidase / glutathione hydrolase / leukotriene-C4 hydrolase OS	Rhipicephalus zambeziensis PE	TRUE	-10.6649	4.0079e-05	382245	579707	380484	578352	19331	31584	-197462	0.659377	-0.180866	1.51658	0.600825
490	765	tr|A0A224Z279|A0A224Z279_9ACAR	N/A	N/A	Sulfide:quinone oxidoreductase OS	Rhipicephalus zambeziensis PE	TRUE	-10.6189	4.1084e-05	60648	171232	51283	172502	20231.3	4948.28	-110584	0.354187	-0.450768	2.82337	1.49742
491	169	tr|A0A224Z298|A0A224Z298_9ACAR	N/A	N/A	Isocitrate dehydrogenase [NAD] subunit, mitochondrial OS	Rhipicephalus zambeziensis PE	TRUE	-10.565	4.2301e-05	350882	583130	366188	586891	40190.7	17823.3	-232248	0.601721	-0.220605	1.6619	0.732833
492	478	tr|F0J9C4|F0J9C4_AMBVA	N/A	N/A	Hypothetical conserved protein 750 (Fragment) OS	Amblyomma variegatum PE	TRUE	10.5303	4.3108e-05	234120	126691	235188	122210	8034.52	18755.4	107429	1.84796	0.266693	0.541136	-0.885936
493	186	tr|A0A224YYU9|A0A224YYU9_9ACAR	N/A	N/A	Fructose-1,6-bisphosphatase I OS	Rhipicephalus zambeziensis PE	TRUE	10.4978	4.3876e-05	170759	99179.8	171135	99940.4	5876.07	12306.1	71579.6	1.72172	0.235961	0.580816	-0.783847
494	644	tr|A0A224YQ32|A0A224YQ32_9ACAR	N/A	N/A	Gamma-butyrobetaine dioxygenase OS	Rhipicephalus zambeziensis PE	TRUE	-10.4868	4.4142e-05	31333.6	93126.5	29058.8	93935.2	9294.47	7245.51	-61792.9	0.336463	-0.473063	2.9721	1.57148
495	529	tr|A0A224Z8H8|A0A224Z8H8_9ACAR	N/A	N/A	Selenium binding protein OS	Rhipicephalus zambeziensis PE	TRUE	-10.4247	4.5669e-05	148647	204366	148600	204752	8053.99	7029.02	-55719.4	0.727355	-0.138254	1.37484	0.459268
496	571	tr|A0A023GCN0|A0A023GCN0_9ACAR	N/A	N/A	Protein lsm14 log a OS	Amblyomma triste PE	TRUE	-10.3915	4.6509e-05	56183.3	290220	57313.5	307479	8478.56	44238.6	-234037	0.193589	-0.71312	5.16559	2.36893
497	143	tr|A0A224YKT1|A0A224YKT1_9ACAR	N/A	N/A	Cytosol aminopeptidase OS	Rhipicephalus zambeziensis PE	TRUE	10.3862	4.6647e-05	915296	802407	911470	801144	17677.9	12651	112889	1.14069	0.0571669	0.876664	-0.189904
498	875	tr|A0A023G079|A0A023G079_9ACAR	N/A	N/A	Putative aicar transformylase/imp cyclohydrolase/methylglyoxal synthase (Fragment) OS	Amblyomma parvum PE	TRUE	10.3375	4.7917e-05	155054	94079.5	155954	95019.9	10520.2	5337.52	60974.7	1.64812	0.216988	0.606752	-0.72082
499	431	tr|C9W1S8|C9W1S8_RHISA	N/A	N/A	Thioredoxin peroxidase (Fragment) OS	Rhipicephalus sanguineus PE	TRUE	-10.3278	4.8176e-05	712409	926067	710920	927634	32570.7	25516.3	-213658	0.769285	-0.113913	1.29991	0.378411
500	301	tr|A0A131XM47|A0A131XM47_9ACAR	N/A	N/A	NADH dehydrogenase [ubiquinone] flavoprotein 1, mitochondrial OS	Hyalomma excavatum PE	TRUE	-10.3165	4.8478e-05	195638	299653	197007	303170	15254.9	13187.4	-104015	0.652882	-0.185165	1.53167	0.615106
501	608	tr|Q6WNW9|Q6WNW9_RHISA	N/A	N/A	Ferritin OS	Rhipicephalus sanguineus GN	TRUE	10.2733	4.9654e-05	376969	301163	373588	301045	12018.8	8564.02	75806.3	1.25171	0.0975044	0.798906	-0.323903
502	914	tr|A0A224YIL5|A0A224YIL5_9ACAR	N/A	N/A	Uncharacterized protein OS	Rhipicephalus zambeziensis PE	TRUE	10.2615	4.9983e-05	143559	35211.1	142659	35137.1	20904.9	2987.9	108348	4.07709	0.61035	0.245273	-2.02754
503	825	tr|A0A224YRF8|A0A224YRF8_9ACAR	N/A	N/A	TIL domain containing protein OS	Rhipicephalus zambeziensis PE	TRUE	10.2588	5.0057e-05	92567.9	64084.7	92408.8	65217.9	4021.44	3829.22	28483.2	1.44446	0.159706	0.692299	-0.530532
504	267	tr|L7M4L8|L7M4L8_9ACAR	N/A	N/A	Putative 60s ribosomal protein l7 OS	Rhipicephalus pulchellus PE	TRUE	-10.2089	5.1473e-05	326517	695103	333503	696597	16004.4	70412.9	-368586	0.469739	-0.328143	2.12884	1.09007
505	979	tr|A0A224YM56|A0A224YM56_9ACAR	N/A	N/A	Legumain OS	Rhipicephalus zambeziensis PE	TRUE	10.1882	5.2072e-05	14019.1	2031.65	14073.1	2053.81	2213.75	798.041	11987.5	6.90038	0.838873	0.14492	-2.78667
506	442	tr|L7M2H2|L7M2H2_9ACAR	N/A	N/A	Coronin OS	Rhipicephalus pulchellus PE	TRUE	-10.177	5.2401e-05	289857	393397	282818	393942	18494.8	8484.07	-103540	0.736805	-0.132647	1.35721	0.440644
507	936	tr|B7PRW2|B7PRW2_IXOSC	N/A	N/A	Insect cuticle domaincontaining protein OS	Ixodes scapularis GN	TRUE	10.1187	5.4149e-05	443063	348730	444540	349237	18547.7	1904.3	94332.6	1.2705	0.103976	0.78709	-0.3454
508	229	tr|A0A224Y399|A0A224Y399_9ACAR	N/A	N/A	Dipeptidyl peptidase 3 OS	Rhipicephalus zambeziensis PE	TRUE	10.0767	5.5449e-05	365883	258596	361219	256225	17713.4	11818.3	107287	1.41488	0.150721	0.706771	-0.500684
509	131	tr|A0A131Z8J7|A0A131Z8J7_RHIAP	N/A	N/A	2,3-bisphosphoglycerate-independent phosphoglycerate mutase OS	Rhipicephalus appendiculatus PE	TRUE	10.0742	5.5528e-05	70403.6	28139.2	68789.8	27661.1	6364.84	5467.32	42264.4	2.50198	0.398284	0.399684	-1.32307
510	202	tr|L7M7B2|L7M7B2_9ACAR	N/A	N/A	Putative metalloexopeptidase OS	Rhipicephalus pulchellus PE	TRUE	9.98424	5.8443e-05	1.22028e+06	908637	1.21448e+06	903372	51844.4	34775.8	311646	1.34298	0.12807	0.744612	-0.42544
511	688	tr|A0A023FKF7|A0A023FKF7_9ACAR	N/A	N/A	Aconitate hydratase, mitochondrial OS	Amblyomma cajennense PE	TRUE	-9.9797	5.8595e-05	175490	369899	172550	365139	26953.8	28132.5	-194409	0.474427	-0.32383	2.1078	1.07574
512	1045	tr|B7P6R8|B7P6R8_IXOSC	N/A	N/A	Secreted inorganic pyrophosphatase, putative (Fragment) OS	Ixodes scapularis GN	TRUE	9.88407	6.19e-05	122852	96613.8	123057	96211	2296.35	4786.97	26238.6	1.27158	0.104344	0.786422	-0.346624
513	841	tr|Q26229|Q26229_RHIAP	N/A	N/A	Autoantigen OS	Rhipicephalus appendiculatus PE	TRUE	9.87552	6.2205e-05	133295	71820.3	132889	71390.3	12349.1	1581.05	61474.7	1.85595	0.268567	0.538807	-0.892159
514	901	tr|A0A131XDZ9|A0A131XDZ9_9ACAR	N/A	N/A	Putative isovaleryl-coa dehydrogenase OS	Hyalomma excavatum PE	TRUE	-9.81734	6.4334e-05	62491.6	77738.7	63100.1	77946.7	2559.36	1760.09	-15247.1	0.803867	-0.0948157	1.24399	0.314971
515	363	tr|B7SP19|B7SP19_DERVA	N/A	N/A	Quinoid dihydropteridine reductase OS	Dermacentor variabilis PE	TRUE	9.81578	6.4392e-05	373674	276520	375443	281066	16555.1	10853	97153.7	1.35134	0.130766	0.740004	-0.434395
516	487	tr|L7M2B5|L7M2B5_9ACAR	N/A	N/A	Proteasome subunit alpha type OS	Rhipicephalus pulchellus PE	TRUE	9.80308	6.4868e-05	539196	449707	536822	448626	9068.01	15846.2	89489.2	1.19899	0.0788172	0.834032	-0.261825
517	178	tr|A0A131XBZ5|A0A131XBZ5_9ACAR	N/A	N/A	Serine hydroxymethyltransferase (Fragment) OS	Hyalomma excavatum PE	TRUE	9.77975	6.5754e-05	237036	152774	233275	152360	15876.8	6698.67	84262.6	1.55155	0.190766	0.644516	-0.633712
518	1012	tr|A0A131XJY6|A0A131XJY6_9ACAR	N/A	N/A	Putative prohibitin-like protein OS	Hyalomma excavatum PE	TRUE	-9.73764	6.7388e-05	16675	110311	10880.6	111403	18701.2	4486.27	-93636.3	0.151163	-0.820554	6.61538	2.72582
519	493	tr|A0A131XAM4|A0A131XAM4_9ACAR	N/A	N/A	Adenylosuccinate lyase OS	Hyalomma excavatum PE	TRUE	-9.69282	6.9179e-05	31368.7	44543.7	31599.4	44864.9	1708.91	2114.22	-13175	0.704223	-0.15229	1.42001	0.505896
520	620	tr|A0A224Z4P0|A0A224Z4P0_9ACAR	N/A	N/A	Small subunit ribosomal protein S28e OS	Rhipicephalus zambeziensis PE	TRUE	-9.64533	7.1137e-05	828383	1.10268e+06	828885	1.09466e+06	43780.2	36308.3	-274299	0.751244	-0.124219	1.33113	0.412647
521	153	tr|L7M7D6|L7M7D6_9ACAR	N/A	N/A	Putative biosynthetic process OS	Rhipicephalus pulchellus PE	TRUE	-9.54598	7.5444e-05	608350	922249	598137	942233	28710.5	59168	-313900	0.659637	-0.180695	1.51599	0.600256
522	782	tr|A0A131XR23|A0A131XR23_9ACAR	N/A	N/A	Putative enolase (Fragment) OS	Hyalomma excavatum PE	TRUE	-9.49934	7.757e-05	26674.5	83129.6	29060.9	82912	9591.34	7020.38	-56455.1	0.320878	-0.49366	3.11645	1.6399
523	383	tr|A0A131YN66|A0A131YN66_RHIAP	N/A	N/A	Uncharacterized protein OS	Rhipicephalus appendiculatus PE	TRUE	-9.45548	7.9633e-05	240899	379330	240153	381753	17796.1	23251.9	-138431	0.635065	-0.197182	1.57464	0.655024
524	576	tr|L7MLA8|L7MLA8_9ACAR	N/A	N/A	Putative head-elevated expression protein (Fragment) OS	Rhipicephalus pulchellus PE	TRUE	-9.41135	8.1773e-05	90845.5	147597	91743.9	148145	7734.77	9253.33	-56751.8	0.615495	-0.210775	1.62471	0.70018
525	406	tr|A0A224Z685|A0A224Z685_9ACAR	N/A	N/A	Polyadenylate-binding protein OS	Rhipicephalus zambeziensis PE	TRUE	-9.40663	8.2006e-05	268812	354318	267893	351108	16721.3	7135.48	-85506.7	0.758673	-0.119946	1.31809	0.398451
526	967	tr|G3MH64|G3MH64_9ACAR	N/A	N/A	Uncharacterized protein (Fragment) OS	Amblyomma maculatum PE	TRUE	9.40146	8.2261e-05	96681.7	65321.2	97022.1	66299.6	3628.39	5598.44	31360.5	1.4801	0.17029	0.675631	-0.565692
527	619	tr|A0A224Z9U1|A0A224Z9U1_9ACAR	N/A	N/A	Thymus specific serine protease OS	Rhipicephalus zambeziensis PE	TRUE	-9.34046	8.5351e-05	130845	149338	129296	149584	3802.8	1103.68	-18492.8	0.876168	-0.0574127	1.14133	0.190721
528	649	tr|L7M8D8|L7M8D8_9ACAR	N/A	N/A	Succinate dehydrogenase [ubiquinone] iron-sulfur subunit, mitochondrial OS	Rhipicephalus pulchellus PE	TRUE	-9.31982	8.6426e-05	117792	178882	118358	176983	9389.37	9148.89	-61089.7	0.658491	-0.18145	1.51862	0.602764
529	755	tr|L7M0J0|L7M0J0_9ACAR	N/A	N/A	Uncharacterized protein OS	Rhipicephalus pulchellus PE	TRUE	-9.31149	8.6865e-05	67173.1	104871	66032	104822	3723.6	7189.98	-37697.5	0.640533	-0.193458	1.5612	0.642655
530	474	tr|L7M4S4|L7M4S4_9ACAR	N/A	N/A	Putative secreted protein OS	Rhipicephalus pulchellus PE	TRUE	9.24961	9.0204e-05	1.57408e+06	1.24708e+06	1.5963e+06	1.23816e+06	66037.5	25264.4	326998	1.26221	0.101132	0.79226	-0.335953
531	646	tr|L7M096|L7M096_9ACAR	N/A	N/A	Putative toll-like receptor 5 OS	Rhipicephalus pulchellus PE	TRUE	9.23705	9.09e-05	271443	95867.9	272259	95181.9	37213.8	7765.49	175575	2.83143	0.452005	0.353179	-1.50153
532	813	tr|A0A131YYH5|A0A131YYH5_RHIAP	N/A	N/A	Calsequestrin OS	Rhipicephalus appendiculatus PE	TRUE	9.23362	9.1091e-05	116404	80054.3	117172	80717.3	5351.15	5775.34	36349.7	1.45406	0.162583	0.687728	-0.54009
533	986	tr|A0A224YCP5|A0A224YCP5_9ACAR	N/A	N/A	Glycine rich superfamily member OS	Rhipicephalus zambeziensis PE	TRUE	9.23352	9.1097e-05	39318.8	11132.1	39258.3	12436	3653	4891.86	28186.7	3.53202	0.548023	0.283124	-1.82049
534	745	tr|L7M6V2|L7M6V2_9ACAR	N/A	N/A	Putative adenosine deaminase OS	Rhipicephalus pulchellus PE	TRUE	-9.23076	9.1251e-05	22261.9	38156.7	22566	37201.2	2091.18	2736.3	-15894.9	0.583432	-0.23401	1.71399	0.777363
535	373	tr|L7MKC0|L7MKC0_9ACAR	N/A	N/A	Putative alternative splicing factor srp20/9g8 rrm superfamily (Fragment) OS	Rhipicephalus pulchellus PE	TRUE	-9.211	9.2363e-05	1.15943e+06	1.43387e+06	1.15646e+06	1.44011e+06	39667.7	44468	-274440	0.808602	-0.0922654	1.2367	0.306499
536	205	tr|V5HH33|V5HH33_IXORI	N/A	N/A	Putative 26s proteasome regulatory complex atpase rpt5 OS	Ixodes ricinus PE	TRUE	-9.18791	9.3682e-05	340378	456399	337040	454830	19997.3	15424.7	-116020	0.745792	-0.127382	1.34086	0.423155
537	162	tr|A0A224Z3B4|A0A224Z3B4_9ACAR	N/A	N/A	Malic enzyme OS	Rhipicephalus zambeziensis PE	TRUE	-9.17941	9.4174e-05	283507	425074	290252	430852	22170.7	21443.9	-141567	0.666959	-0.175901	1.49934	0.584329
538	337	tr|L7M1F0|L7M1F0_9ACAR	N/A	N/A	Putative camp-dependent protein kinase r2 OS	Rhipicephalus pulchellus PE	TRUE	-9.15509	9.5596e-05	327999	389162	329979	392745	10070.4	8781.51	-61162.7	0.842835	-0.0742575	1.18647	0.246678
539	80	tr|F1PTY1|F1PTY1_CANLF	N/A	N/A	Keratin, type II cytoskeletal 1 OS	Canis lupus familiaris GN	TRUE	-9.05336	0.0001	2.67363e+06	4.71873e+06	2.68544e+06	4.86121e+06	65453.4	447021	-2.0451e+06	0.5666	-0.246723	1.76491	0.819597
540	538	tr|V5IJP4|V5IJP4_IXORI	N/A	N/A	Putative nuclease sensitive element-binding protein OS	Ixodes ricinus PE	TRUE	-9.07911	0.0001	32801.8	57775.9	33162.1	58203.6	1464.06	5303.06	-24974.1	0.567742	-0.245849	1.76136	0.816693
541	49	tr|A0A131YYR4|A0A131YYR4_RHIAP	N/A	N/A	Heat shock 70kDa protein 1/8 OS	Rhipicephalus appendiculatus PE	TRUE	8.98314	0.00011	956626	714419	950130	714505	43428.1	31966.7	242207	1.33903	0.126789	0.746812	-0.421184
542	108	tr|A0A224Z3G3|A0A224Z3G3_9ACAR	N/A	N/A	V-type H+-transporting ATPase subunit A OS	Rhipicephalus zambeziensis PE	TRUE	-8.87313	0.00011	230024	406942	239493	407066	35585.2	17996.9	-176918	0.56525	-0.24776	1.76913	0.823039
543	391	tr|V5HR13|V5HR13_IXORI	N/A	N/A	Putative sarcomere (Fragment) OS	Ixodes ricinus PE	TRUE	-8.89136	0.00011	535909	658880	536062	657412	17196.3	21665.9	-122971	0.813363	-0.0897156	1.22946	0.298029
544	475	tr|C9W1P7|C9W1P7_RHISA	N/A	N/A	ATP synthase H+ transporting mitochondrial F1 complex delta subunit OS	Rhipicephalus sanguineus PE	TRUE	-8.88887	0.00011	129181	264962	127708	264816	19286.7	23693.3	-135781	0.487545	-0.311985	2.05109	1.03639
545	647	tr|V5HGA0|V5HGA0_IXORI	N/A	N/A	40S ribosomal protein S24 OS	Ixodes ricinus PE	TRUE	-8.94902	0.00011	83229.1	119117	82457.2	117347	4034.85	6931.6	-35887.5	0.69872	-0.155697	1.43119	0.517214
546	978	tr|A0A224Z2Z3|A0A224Z2Z3_9ACAR	N/A	N/A	Ubiquitin carboxyl-terminal hydrolase OS	Rhipicephalus zambeziensis PE	TRUE	8.86503	0.00011	64764.4	49346.7	64796	48857.7	2202.04	2692.52	15417.7	1.31244	0.118078	0.761942	-0.392246
547	33	tr|F1PYU9|F1PYU9_CANLF	N/A	N/A	Keratin, type I cytoskeletal 10 OS	Canis lupus familiaris GN	TRUE	-8.81187	0.00012	3.32513e+06	7.62941e+06	3.7767e+06	7.68572e+06	934104	286078	-4.30428e+06	0.43583	-0.360683	2.29447	1.19816
548	99	tr|L7M721|L7M721_9ACAR	N/A	N/A	Putative lipoprotein amino terminal region OS	Rhipicephalus pulchellus PE	TRUE	-8.79924	0.00012	1.85312e+06	2.82995e+06	1.88766e+06	2.87644e+06	100260	198099	-976827	0.654826	-0.183874	1.52712	0.610818
549	369	tr|G3MNQ4|G3MNQ4_9ACAR	N/A	N/A	Uncharacterized protein OS	Amblyomma maculatum PE	TRUE	-8.80073	0.00012	81535.2	139552	78486	141248	10400	8103.77	-58016.7	0.584264	-0.233391	1.71155	0.775307
550	457	tr|A0A1E1XH73|A0A1E1XH73_9ACAR	N/A	N/A	Putative cysteine s-methyltransferase (Fragment) OS	Amblyomma aureolatum PE	TRUE	-8.74353	0.00012	456106	606883	455589	614529	25137.7	23613.2	-150777	0.751554	-0.12404	1.33058	0.412051
551	463	tr|A0A023FLT6|A0A023FLT6_9ACAR	N/A	N/A	Putative vitellogenin-2 OS	Amblyomma cajennense PE	TRUE	-8.80098	0.00012	122751	293534	136780	291643	38004.3	7867.11	-170783	0.418183	-0.378634	2.3913	1.2578
552	985	tr|A0A224YDZ8|A0A224YDZ8_9ACAR	N/A	N/A	Replication factor A3 OS	Rhipicephalus zambeziensis PE	TRUE	8.84289	0.00012	14320.8	4098.42	13730.3	3970.51	2201.62	705.864	10222.4	3.49424	0.543352	0.286186	-1.80498
553	451	tr|A0A131YK44|A0A131YK44_RHIAP	N/A	N/A	Urocanate hydratase OS	Rhipicephalus appendiculatus PE	TRUE	8.65083	0.00013	142852	61240.3	150597	60132.2	17960.1	5782.26	81611.8	2.33265	0.367849	0.428697	-1.22197
554	512	tr|A0A023FV38|A0A023FV38_9ACAR	N/A	N/A	Putative 15-hydroxyprostaglandin dehydrogenase OS	Amblyomma parvum PE	TRUE	8.63123	0.00013	386446	323782	384329	328632	6165.19	13146.3	62663.2	1.19353	0.0768351	0.837847	-0.255241
555	668	tr|A0A224YLY0|A0A224YLY0_9ACAR	N/A	N/A	Midgut cysteine proteinase 2 OS	Rhipicephalus zambeziensis PE	TRUE	8.70047	0.00013	726879	509279	714642	512033	30017.3	40012.2	217599	1.42727	0.154506	0.700639	-0.513257
556	111	tr|A0A224YQ83|A0A224YQ83_9ACAR	N/A	N/A	40s ribosomal protein s3 OS	Rhipicephalus zambeziensis PE	TRUE	-8.52888	0.00014	1.20887e+06	1.70822e+06	1.21625e+06	1.68683e+06	71070.6	93061.9	-499350	0.707677	-0.150165	1.41307	0.498836
557	569	tr|L7M639|L7M639_9ACAR	N/A	N/A	Putative der and-71 ribosomal protein l35 OS	Rhipicephalus pulchellus PE	TRUE	-8.60073	0.00014	127497	258568	122624	247750	20210.2	22815.2	-131072	0.493086	-0.307077	2.02804	1.02009
558	638	tr|F1PZC6|F1PZC6_CANLF	N/A	N/A	Histidine rich glycoprotein OS	Canis lupus familiaris GN	TRUE	8.53126	0.00014	151502	38770.6	145742	39729.6	21834.4	14889.3	112732	3.90766	0.591917	0.255907	-1.96631
559	710	tr|L7M8S3|L7M8S3_9ACAR	N/A	N/A	Putative 26s proteasome regulatory complex subunit rpn8/psmd7 OS	Rhipicephalus pulchellus PE	TRUE	8.52519	0.00014	128822	100514	128865	101540	1426.23	6486.19	28308.5	1.28164	0.107765	0.780251	-0.357989
560	983	tr|A0A224YHD1|A0A224YHD1_9ACAR	N/A	N/A	Amblyomma 40 33 family member OS	Rhipicephalus zambeziensis PE	TRUE	8.50955	0.00014	36517.1	15356.6	37633.9	15724.3	4671.29	1706.84	21160.5	2.37794	0.376201	0.420532	-1.24971
561	1074	tr|L7M7I7|L7M7I7_9ACAR	N/A	N/A	Putative alkyl hydroperoxide reductase thiol specific antioxidant OS	Rhipicephalus pulchellus PE	TRUE	8.60232	0.00014	377624	317345	382320	318560	10970.5	8721.22	60279.4	1.18995	0.0755285	0.840372	-0.2509
562	120	tr|A0A224ZBZ1|A0A224ZBZ1_9ACAR	N/A	N/A	Voltage-dependent anion channel protein 2 OS	Rhipicephalus zambeziensis PE	TRUE	8.43299	0.00015	63167.5	46242.3	63204.3	46994.5	815.076	3930.42	16925.2	1.36601	0.135454	0.732058	-0.449969
563	223	tr|L7N0F2|L7N0F2_CANLF	N/A	N/A	Uncharacterized protein OS	Canis lupus familiaris PE	TRUE	8.43084	0.00015	360264	53388.6	325514	52473.3	72009.2	10689.7	306875	6.74795	0.829172	0.148193	-2.75445
564	691	tr|A0A131YS81|A0A131YS81_RHIAP	N/A	N/A	Aldehyde dehydrogenase (NAD+) OS	Rhipicephalus appendiculatus PE	TRUE	8.49732	0.00015	406164	213208	409482	208041	27995.5	35761.1	192957	1.90502	0.279899	0.524929	-0.929805
565	794	tr|F2Z4Q7|F2Z4Q7_CANLF	N/A	N/A	Serpin family F member 1 OS	Canis lupus familiaris GN	TRUE	8.44141	0.00015	55952.2	10016.5	57267	7389.89	5530.44	9373.55	45935.7	5.58601	0.747102	0.179019	-2.48182
566	969	tr|C9W1B7|C9W1B7_RHISA	N/A	N/A	Cytochrome c oxidase subunit OS	Rhipicephalus sanguineus PE	TRUE	-8.43598	0.00015	207981	284356	203874	287282	14332.9	11064.9	-76375.2	0.73141	-0.135839	1.36722	0.451248
567	286	tr|G3ML11|G3ML11_9ACAR	N/A	N/A	Uncharacterized protein OS	Amblyomma maculatum PE	TRUE	-8.23392	0.00017	257114	316316	260063	316529	9902.03	10427.8	-59202.6	0.812837	-0.0899963	1.23026	0.298961
568	855	tr|Q8I6X5|Q8I6X5_RHIMP	N/A	N/A	Antigen B membrane protein OS	Rhipicephalus microplus GN	TRUE	-8.30637	0.00017	30797.2	51477.8	30271.8	51735.1	4476.51	2180.8	-20680.6	0.598262	-0.223109	1.67151	0.741151
569	872	tr|A0A224YYL3|A0A224YYL3_9ACAR	N/A	N/A	ATP synthase subunit alpha OS	Rhipicephalus zambeziensis PE	TRUE	-8.23221	0.00017	409516	510359	413347	507703	17454.2	17192.7	-100843	0.802407	-0.0956053	1.24625	0.317594
570	942	tr|Q9XYR3|Q9XYR3_RHIMP	N/A	N/A	Carboxylesterase-related protein (Fragment) OS	Rhipicephalus microplus PE	TRUE	8.26744	0.00017	386189	185561	375572	184982	47734.8	8773.19	200627	2.08119	0.318312	0.480494	-1.05741
571	26	tr|A0A131Z9H5|A0A131Z9H5_RHIAP	N/A	N/A	Laminin, beta 1 (Fragment) OS	Rhipicephalus appendiculatus PE	TRUE	-8.21637	0.00018	914154	1.14081e+06	900739	1.15445e+06	38062.4	39939.7	-226656	0.80132	-0.0961938	1.24794	0.319549
572	509	tr|A0A224Z0D2|A0A224Z0D2_9ACAR	N/A	N/A	Histidine ammonia-lyase OS	Rhipicephalus zambeziensis PE	TRUE	8.18932	0.00018	304460	153821	307823	164893	25711.8	26312.3	150639	1.97931	0.296514	0.505226	-0.984998
573	515	tr|L7M2D0|L7M2D0_9ACAR	N/A	N/A	Putative mitochondrial chaperonin OS	Rhipicephalus pulchellus PE	TRUE	-8.20062	0.00018	158349	227446	157227	231959	10404.4	13256.1	-69096.7	0.696206	-0.157262	1.43636	0.522414
574	912	tr|A0A023FLD4|A0A023FLD4_9ACAR	N/A	N/A	Putative acetyl-coa acetyltransferase OS	Amblyomma cajennense PE	TRUE	8.15563	0.00018	139629	108905	140587	108464	6722.71	3401.51	30723.4	1.28211	0.107925	0.779964	-0.35852
575	955	tr|L7LZT3|L7LZT3_9ACAR	N/A	N/A	Putative xaa-pro dipeptidase OS	Rhipicephalus pulchellus PE	TRUE	-8.14229	0.00018	40251.4	57480.8	41584.5	57456.2	3591.35	2238.87	-17229.3	0.700259	-0.154741	1.42804	0.514039
576	1075	tr|L7M801|L7M801_9ACAR	N/A	N/A	Putative translocase of outer membrane 40 OS	Rhipicephalus pulchellus PE	TRUE	-8.21857	0.00018	15627.4	28343	15549.5	28529.7	700.132	3014.09	-12715.5	0.551369	-0.258558	1.81367	0.85891
577	1008	tr|A0A224Z4R6|A0A224Z4R6_9ACAR	N/A	N/A	NADH dehydrogenase (Ubiquinone) 1 beta subcomplex subunit 6 OS	Rhipicephalus zambeziensis PE	TRUE	-8.12815	0.00019	104196	249288	103983	252458	20281.8	29380.7	-145093	0.417973	-0.378852	2.3925	1.25852
578	553	tr|L7LXH0|L7LXH0_9ACAR	N/A	N/A	Uncharacterized protein OS	Rhipicephalus pulchellus PE	TRUE	-8.00278	0.0002	132601	173097	133091	172951	7393.6	6910.7	-40495.8	0.766051	-0.115742	1.3054	0.384488
579	824	tr|L7M3R3|L7M3R3_9ACAR	N/A	N/A	Putative cargo transport protein OS	Rhipicephalus pulchellus PE	TRUE	-8.03002	0.0002	91452.8	132162	91008.1	132609	3220.68	9614.01	-40708.7	0.691978	-0.159908	1.44513	0.531203
580	652	tr|L7M5T3|L7M5T3_9ACAR	N/A	N/A	Proteasome subunit alpha type OS	Rhipicephalus pulchellus PE	TRUE	7.86981	0.00022	239949	207945	241159	211338	3781.34	7200.82	32003.7	1.1539	0.06217	0.866623	-0.206524
581	776	tr|L7LWZ7|L7LWZ7_9ACAR	N/A	N/A	Putative maternal expression at 31b OS	Rhipicephalus pulchellus PE	TRUE	-7.90072	0.00022	30869.1	72725.3	30935.2	73157.8	10270.1	2606.08	-41856.2	0.424461	-0.372162	2.35593	1.23629
582	157	tr|C9W1U0|C9W1U0_RHISA	N/A	N/A	Putative cement protein (Fragment) OS	Rhipicephalus sanguineus PE	TRUE	-7.84793	0.00023	3.02832e+07	4.53236e+07	3.02248e+07	4.58094e+07	393096	3.81274e+06	-1.50404e+07	0.668156	-0.175122	1.49666	0.581743
583	935	tr|B7QIS3|B7QIS3_IXOSC	N/A	N/A	3-hydroxyacyl-CoA dehydrogenase, putative OS	Ixodes scapularis GN	TRUE	-7.82513	0.00023	22199.2	120807	15287.4	123005	20434.6	14751.5	-98607.6	0.183758	-0.735754	5.44195	2.44412
584	462	tr|A0A023FG92|A0A023FG92_9ACAR	N/A	N/A	Uncharacterized protein OS	Amblyomma cajennense PE	TRUE	-7.74258	0.00024	215317	298477	208532	301969	17779.9	12054.9	-83160	0.721386	-0.141833	1.38622	0.471158
585	610	tr|A0A131XJQ8|A0A131XJQ8_9ACAR	N/A	N/A	Putative inducible metalloproteinase OS	Hyalomma excavatum PE	TRUE	7.72209	0.00025	23906.6	6735.87	24911.2	6812.33	4317.86	1064.57	17170.7	3.54914	0.550123	0.281758	-1.82747
586	859	tr|L7LQP4|L7LQP4_9ACAR	N/A	N/A	Putative salivary lipocalin OS	Rhipicephalus pulchellus PE	TRUE	-7.71128	0.00025	202730	577550	202357	612148	10237.7	96672.9	-374820	0.351017	-0.454671	2.84886	1.51039
587	388	tr|F1PG39|F1PG39_CANLF	N/A	N/A	Inter-alpha-trypsin inhibitor heavy chain 2 OS	Canis lupus familiaris GN	TRUE	7.65427	0.00026	267399	95046.1	263484	87461.8	37423.7	25051.3	172353	2.81336	0.449225	0.355447	-1.49229
588	407	tr|L7LVH9|L7LVH9_9ACAR	N/A	N/A	Histone H3 OS	Rhipicephalus pulchellus PE	TRUE	-7.63602	0.00026	7.34878e+06	1.05838e+07	7.35739e+06	1.054e+07	546242	647725	-3.23502e+06	0.694342	-0.158427	1.44021	0.526282
589	456	tr|A0A224Z7N5|A0A224Z7N5_9ACAR	N/A	N/A	40S ribosomal protein S21 OS	Rhipicephalus zambeziensis PE	TRUE	-7.67973	0.00026	98520.1	138366	100264	140606	7235.47	7438.11	-39845.4	0.712028	-0.147503	1.40444	0.489994
590	987	tr|A0A224YC57|A0A224YC57_9ACAR	N/A	N/A	Cathepsin C OS	Rhipicephalus zambeziensis PE	TRUE	7.6799	0.00026	68743.7	9529.91	66100.7	3840.07	8529.95	12846.4	59213.8	7.21347	0.858144	0.13863	-2.85069
591	1028	tr|G3MSH9|G3MSH9_9ACAR	N/A	N/A	Carboxylic ester hydrolase OS	Amblyomma maculatum PE	TRUE	-7.63166	0.00026	98546.3	137804	97473.8	141162	4668.83	9167.81	-39258	0.715118	-0.145622	1.39837	0.483747
592	177	tr|A0A131YXB7|A0A131YXB7_RHIAP	N/A	N/A	Transketolase OS	Rhipicephalus appendiculatus PE	TRUE	-7.60064	0.00027	815277	916686	813566	922341	13337.6	23112	-101409	0.889374	-0.0509155	1.12439	0.169138
593	192	tr|A0A224YTY7|A0A224YTY7_9ACAR	N/A	N/A	Glyceraldehyde-3-phosphate dehydrogenase OS	Rhipicephalus zambeziensis PE	TRUE	-7.5613	0.00028	2.26876e+06	2.74789e+06	2.21653e+06	2.74886e+06	124886	21555.7	-479134	0.825636	-0.0832114	1.21119	0.276422
594	122	tr|F1PWR2|F1PWR2_CANLF	N/A	N/A	Uncharacterized protein OS	Canis lupus familiaris PE	TRUE	7.51271	0.00029	560851	148760	593232	149300	108104	18676.9	412091	3.77018	0.576362	0.265239	-1.91463
595	414	tr|Q2VMW0|Q2VMW0_AMBAM	N/A	N/A	Histamine release factor OS	Amblyomma americanum PE	TRUE	7.46687	0.0003	341622	268712	344487	269050	8828.98	17419.2	72910.2	1.27133	0.104259	0.786576	-0.346341
596	544	tr|E1CAX9|E1CAX9_HAELO	N/A	N/A	Vitellogenin-1 OS	Haemaphysalis longicornis GN	TRUE	7.47583	0.0003	3.53704e+06	2.29832e+06	3.51024e+06	2.33289e+06	303168	133829	1.23872e+06	1.53897	0.187229	0.649786	-0.621962
597	666	tr|A0A131YL38|A0A131YL38_RHIAP	N/A	N/A	N-acetylneuraminate lyase OS	Rhipicephalus appendiculatus PE	TRUE	7.42058	0.00031	187528	97121.1	195641	91443.6	20168.7	13673	90406.8	1.93087	0.285752	0.517902	-0.949249
598	593	tr|A0A034WXH1|A0A034WXH1_RHIMP	N/A	N/A	Vitellogenin 5 (Fragment) OS	Rhipicephalus microplus PE	TRUE	7.38365	0.00032	89699.8	36336.8	93919.9	36040	13849.5	4137.76	53363	2.46857	0.392445	0.405093	-1.30367
599	993	tr|A0A131YZ91|A0A131YZ91_RHIAP	N/A	N/A	Molybdopterin cofactor sulfurase OS	Rhipicephalus appendiculatus PE	TRUE	-7.38901	0.00032	26765.9	52939.2	27966.4	54461.7	5711.62	4191.19	-26173.3	0.505597	-0.296195	1.97786	0.98394
600	1063	tr|L7MHT9|L7MHT9_9ACAR	N/A	N/A	Coronin (Fragment) OS	Rhipicephalus pulchellus PE	TRUE	-7.36477	0.00032	55146.2	75507.1	54868	75451.4	5254.23	1722.2	-20360.9	0.730344	-0.136472	1.36922	0.453351
601	412	tr|A0A224YIR8|A0A224YIR8_9ACAR	N/A	N/A	Uncharacterized protein OS	Rhipicephalus zambeziensis PE	TRUE	7.34439	0.00033	176519	101923	174375	107492	15190.1	13487.4	74596.3	1.73189	0.238521	0.577403	-0.792349
602	550	tr|A0A224Z194|A0A224Z194_9ACAR	N/A	N/A	Lysozyme OS	Rhipicephalus zambeziensis PE	TRUE	-7.27365	0.00034	115172	326600	117535	330041	56229.7	14763.5	-211429	0.352638	-0.452671	2.83577	1.50374
603	1049	tr|V5HHG8|V5HHG8_IXORI	N/A	N/A	40S ribosomal protein S30 OS	Ixodes ricinus PE	TRUE	-7.27326	0.00034	233890	290223	232520	290687	13500.4	7595.66	-56333	0.805897	-0.0937203	1.24085	0.311332
604	128	tr|A0A131YDW8|A0A131YDW8_RHIAP	N/A	N/A	Galectin OS	Rhipicephalus appendiculatus PE	TRUE	-7.18865	0.00037	144062	396915	125908	399600	66119.8	24020.5	-252853	0.362955	-0.440147	2.75516	1.46214
605	728	tr|L7LZJ5|L7LZJ5_9ACAR	N/A	N/A	Uncharacterized protein OS	Rhipicephalus pulchellus PE	TRUE	7.15578	0.00038	9937.19	3505.71	9965.2	3476.25	1795.21	91.9167	6431.48	2.83457	0.452488	0.352787	-1.50313
606	895	tr|A0A1E1XEH7|A0A1E1XEH7_9ACAR	N/A	N/A	Glycerol-3-phosphate dehydrogenase [NAD(+)] OS	Amblyomma aureolatum PE	TRUE	7.14882	0.00038	119149	87903.6	122191	88922.5	8075.3	3347.24	31245.9	1.35546	0.132085	0.737759	-0.438778
607	931	tr|L7M094|L7M094_9ACAR	N/A	N/A	Uncharacterized protein OS	Rhipicephalus pulchellus PE	TRUE	7.14084	0.00038	45751	11664.3	46502.5	11375.1	9361.95	1870.44	34086.7	3.9223	0.593541	0.254952	-1.9717
608	1032	tr|J9NUI6|J9NUI6_CANLF	N/A	N/A	Alpha-1-microglobulin/bikunin precursor OS	Canis lupus familiaris GN	TRUE	7.09474	0.00039	49610.8	12744.5	48850	12512.9	4750.03	9243.51	36866.2	3.89271	0.590252	0.256891	-1.96077
609	1037	tr|G3MPJ6|G3MPJ6_9ACAR	N/A	N/A	Uncharacterized protein OS	Amblyomma maculatum PE	TRUE	7.11868	0.00039	48519.4	29290.9	48162.8	28433.3	4285.53	3289.2	19228.5	1.65647	0.219183	0.603694	-0.72811
610	180	tr|A0A224YCV5|A0A224YCV5_9ACAR	N/A	N/A	Fatty acid-binding protein 7 OS	Rhipicephalus zambeziensis PE	TRUE	7.08011	0.0004	972714	571656	987870	554109	99885	53459.9	401058	1.70157	0.23085	0.587692	-0.766869
611	769	tr|L7MAM7|L7MAM7_9ACAR	N/A	N/A	Putative programmed cell death 4 OS	Rhipicephalus pulchellus PE	TRUE	-7.06615	0.0004	33921.2	59226.2	34415.6	60013	6517.38	2970.24	-25304.9	0.57274	-0.242042	1.74599	0.804047
612	490	tr|A0A224Z379|A0A224Z379_9ACAR	N/A	N/A	Regulator of chromosome condensation OS	Rhipicephalus zambeziensis PE	TRUE	-7.04662	0.00041	119325	194923	120802	196413	19918.2	7977.9	-75597.8	0.612166	-0.213131	1.63354	0.708005
613	343	tr|L7LWV3|L7LWV3_9ACAR	N/A	N/A	Putative atp-dependent rna helicase OS	Rhipicephalus pulchellus PE	TRUE	-6.996	0.00042	205555	293138	195997	293136	24793.9	3487.39	-87582.9	0.701223	-0.154144	1.42608	0.512055
614	596	tr|L7M7J5|L7M7J5_9ACAR	N/A	N/A	Putative 20s proteasome regulatory subunit beta type psmb1/pre7 OS	Rhipicephalus pulchellus PE	TRUE	7.00999	0.00042	135125	103630	136665	102909	7622.48	4757.99	31494.4	1.30391	0.115248	0.766923	-0.382845
615	643	tr|A0A224YVE7|A0A224YVE7_9ACAR	N/A	N/A	Protein containing I-set domain OS	Rhipicephalus zambeziensis PE	TRUE	6.95466	0.00044	209866	95376.4	215476	94908.3	31281.3	10271.9	114490	2.2004	0.342502	0.454463	-1.13777
616	682	tr|L7M261|L7M261_9ACAR	N/A	N/A	Putative h+ transporting atp synthase subunit e protein OS	Rhipicephalus pulchellus PE	TRUE	-6.96479	0.00044	273437	379031	267784	379625	26012.6	15581.7	-105594	0.72141	-0.141818	1.38617	0.471109
617	946	tr|L7MGW5|L7MGW5_9ACAR	N/A	N/A	Uncharacterized protein (Fragment) OS	Rhipicephalus pulchellus PE	TRUE	-6.94869	0.00044	110646	187890	106761	192407	15581.6	15859	-77244.1	0.588887	-0.229968	1.69812	0.763937
618	655	tr|L7M8L1|L7M8L1_9ACAR	N/A	N/A	Putative gdp-l-fucose synthetase OS	Rhipicephalus pulchellus PE	TRUE	6.89981	0.00046	455113	309434	470956	309685	41387.2	8379.73	145679	1.47079	0.167552	0.679905	-0.556594
619	283	tr|A0A224YPB8|A0A224YPB8_9ACAR	N/A	N/A	Heat shock protein OS	Rhipicephalus zambeziensis PE	TRUE	6.87096	0.00047	685136	545991	680652	544175	39067.9	10684.2	139146	1.25485	0.0985918	0.796908	-0.327515
620	650	tr|L7LYB6|L7LYB6_9ACAR	N/A	N/A	Uncharacterized protein OS	Rhipicephalus pulchellus PE	TRUE	6.8633	0.00047	118100	44110.7	118137	51689.8	6156.04	20663.5	73989.7	2.67737	0.427708	0.373501	-1.42081
621	807	tr|L7MII3|L7MII3_9ACAR	N/A	N/A	Putative dimethylglycine dehydrogenase (Fragment) OS	Rhipicephalus pulchellus PE	TRUE	6.86361	0.00047	12075.9	2161.89	11053	2089.05	2871.16	319.294	9913.98	5.58579	0.747084	0.179026	-2.48176
622	957	tr|L7LSU6|L7LSU6_9ACAR	N/A	N/A	Uncharacterized protein OS	Rhipicephalus pulchellus PE	TRUE	-6.87899	0.00047	16873.6	30583.2	17473.3	31012.1	3741.15	1375.31	-13709.6	0.551728	-0.258275	1.81249	0.857972
623	988	tr|A0A224Y7G2|A0A224Y7G2_9ACAR	N/A	N/A	MICOS complex subunit OS	Rhipicephalus zambeziensis PE	TRUE	-6.86787	0.00047	12997	36383.9	11985.9	34713.4	4319.66	5265.35	-23386.9	0.357218	-0.447066	2.79941	1.48512
624	83	tr|A0A224Z8V8|A0A224Z8V8_9ACAR	N/A	N/A	SND1 nuclease domain-containing protein 1 OS	Rhipicephalus zambeziensis PE	TRUE	-6.83113	0.00048	768049	936051	766087	936186	18137.7	45720.9	-168002	0.820521	-0.0859105	1.21874	0.285389
625	402	tr|A0A224Z3W5|A0A224Z3W5_9ACAR	N/A	N/A	Eukaryotic translation initiation factor 3 subunit I OS	Rhipicephalus zambeziensis PE	TRUE	-6.83585	0.00048	162683	205855	159699	206901	10685.3	6735.7	-43172.2	0.790279	-0.10222	1.26538	0.339566
626	545	tr|A0A1E1XT30|A0A1E1XT30_9ACAR	N/A	N/A	Putative heat shock-related protein OS	Amblyomma sculptum PE	TRUE	-6.82809	0.00048	37548.4	120515	48495.6	121463	23640.5	5629.31	-82966.5	0.311566	-0.506449	3.20959	1.68239
627	919	tr|A0A131Z9N8|A0A131Z9N8_RHIAP	N/A	N/A	Farnesoic acid o-methyltransferase (Fragment) OS	Rhipicephalus appendiculatus PE	TRUE	6.85309	0.00048	55950.2	14188.1	57305.7	12840.7	5869.5	10681.4	41762.1	3.94347	0.595878	0.253584	-1.97946
628	722	tr|A0A034WXI1|A0A034WXI1_RHIMP	N/A	N/A	Alpha2 macroglobulin 1 (Fragment) OS	Rhipicephalus microplus PE	TRUE	6.81573	0.00049	267280	191952	268068	191852	11277.4	19010.6	75327.2	1.39243	0.143772	0.718171	-0.477601
629	689	tr|A0A1E1XED9|A0A1E1XED9_9ACAR	N/A	N/A	Putative methyltransferase OS	Amblyomma aureolatum PE	TRUE	6.77647	0.0005	558354	473141	563744	472422	23846.4	7990.89	85213	1.1801	0.071919	0.847385	-0.23891
630	132	tr|A0A224Z4Y4|A0A224Z4Y4_9ACAR	N/A	N/A	Myosin regulatory light chain 12 OS	Rhipicephalus zambeziensis PE	TRUE	6.70877	0.00053	165440	108064	166058	105461	9136	14460.6	57376.3	1.53095	0.184961	0.65319	-0.614426
631	934	tr|C9W1L2|C9W1L2_RHISA	N/A	N/A	NADH dehydrogenase [ubiquinone] 1 alpha subcomplex subunit 12 OS	Rhipicephalus sanguineus PE	TRUE	-6.71934	0.00053	16072.5	52142.3	14337.6	51895.7	10690.9	984.663	-36069.8	0.308243	-0.511106	3.24419	1.69786
632	440	tr|G3MQ54|G3MQ54_9ACAR	N/A	N/A	Proteasome subunit beta type OS	Amblyomma maculatum PE	TRUE	-6.69551	0.00054	189976	264749	191512	266115	11161.4	19346.5	-74773	0.71757	-0.144136	1.39359	0.478808
633	768	tr|L7MBP6|L7MBP6_9ACAR	N/A	N/A	Putative pterin carbinolamine dehydratase pcbd/dimerization cofactor of hnf1 (Fragment) OS	Rhipicephalus pulchellus PE	TRUE	6.69284	0.00054	127266	66049.1	126652	67041.3	13285.4	12575.4	61216.7	1.92684	0.284845	0.518986	-0.946233
634	714	tr|A0A1E1XAG7|A0A1E1XAG7_9ACAR	N/A	N/A	Putative cytoskeletal regulator flightless-i (Fragment) OS	Amblyomma aureolatum PE	TRUE	-6.64995	0.00056	167402	270289	168781	260323	10713.7	29029.7	-102887	0.619345	-0.208067	1.61461	0.691184
635	950	tr|L7M5S1|L7M5S1_9ACAR	N/A	N/A	Putative phosphatidylinositol transfer protein OS	Rhipicephalus pulchellus PE	TRUE	-6.64482	0.00056	50107.7	77226.8	51939	78569.9	6446.9	5006.31	-27119	0.648839	-0.187863	1.54121	0.624067
636	876	tr|A0A1E1X380|A0A1E1X380_9ACAR	N/A	N/A	Putative netrin axonal chemotropic factor (Fragment) OS	Amblyomma aureolatum PE	TRUE	-6.59986	0.00058	45399.5	193115	28797.7	189047	42863.3	12903	-147715	0.23509	-0.628765	4.25368	2.08871
637	625	tr|A0A131Z2F5|A0A131Z2F5_RHIAP	N/A	N/A	Uncharacterized protein OS	Rhipicephalus appendiculatus PE	TRUE	6.56606	0.0006	70967.6	46670.2	71221.2	44868.9	6219.49	4011.39	24297.4	1.52062	0.18202	0.657627	-0.604658
638	829	tr|L7LWM6|L7LWM6_9ACAR	N/A	N/A	Putative klingon OS	Rhipicephalus pulchellus PE	TRUE	-6.55749	0.0006	39643.3	62111.1	39043.2	61370.6	4688.04	4997.95	-22467.7	0.638265	-0.194999	1.56675	0.647772
639	7	tr|L7LWI3|L7LWI3_9ACAR	N/A	N/A	Putative lipoprotein amino terminal region OS	Rhipicephalus pulchellus PE	TRUE	6.52183	0.00062	5.48097e+06	3.02669e+06	5.63318e+06	2.94423e+06	726269	197475	2.45428e+06	1.81088	0.25789	0.552218	-0.856691
640	56	tr|A0A131Z678|A0A131Z678_RHIAP	N/A	N/A	TIL domain containing protein (Fragment) OS	Rhipicephalus appendiculatus PE	TRUE	6.51506	0.00062	1.03495e+06	791303	1.03381e+06	795916	72680.7	17657.2	243646	1.30791	0.116576	0.764581	-0.387258
641	306	tr|A0A131Z7V1|A0A131Z7V1_RHIAP	N/A	N/A	Ribosomal protein OS	Rhipicephalus appendiculatus PE	TRUE	6.48408	0.00064	444442	351575	447098	349202	18640.8	21749.7	92867.7	1.26415	0.101798	0.791047	-0.338165
642	11	tr|A0A224YUL1|A0A224YUL1_9ACAR	N/A	N/A	Lipoprotein amino terminal region OS	Rhipicephalus zambeziensis PE	TRUE	-6.42152	0.00067	8.15151e+06	9.46928e+06	8.15284e+06	9.41635e+06	355424	205233	-1.31777e+06	0.860838	-0.0650788	1.16166	0.216187
643	385	tr|A0A224YGA0|A0A224YGA0_9ACAR	N/A	N/A	3-hydroxyacyl-CoA dehydrogenase OS	Rhipicephalus zambeziensis PE	TRUE	-6.32162	0.00073	156558	233701	164985	232934	22964.8	8263.41	-77143.6	0.669905	-0.173987	1.49275	0.577971
644	417	tr|L7M595|L7M595_9ACAR	N/A	N/A	Uncharacterized protein OS	Rhipicephalus pulchellus PE	TRUE	-6.31778	0.00073	310698	381760	305577	381259	20850.7	8444.97	-71062.3	0.813856	-0.0894523	1.22872	0.297154
645	921	tr|F0JAD9|F0JAD9_AMBVA	N/A	N/A	Cytochrome b-c1 complex subunit 7 OS	Amblyomma variegatum PE	TRUE	-6.30539	0.00074	93509	196394	105839	195919	32117.1	5784.54	-102885	0.47613	-0.322274	2.10027	1.07057
646	248	tr|A0A0A7DS56|A0A0A7DS56_RHIMP	N/A	N/A	Pyruvate kinase OS	Rhipicephalus microplus PE	TRUE	-6.2859	0.00075	871645	995386	874393	995629	35663.9	16678.3	-123741	0.875685	-0.0576519	1.14196	0.191516
647	411	tr|L7M6I3|L7M6I3_9ACAR	N/A	N/A	Putative prolyl endopeptidase prolyl oligopeptidase prolyl endopeptidase prolyl oligopeptidase OS	Rhipicephalus pulchellus PE	TRUE	6.29832	0.00075	88790.2	60550.6	90084.9	59615.2	4198.55	7923.71	28239.5	1.46638	0.166246	0.681952	-0.552258
648	483	tr|L7MM36|L7MM36_9ACAR	N/A	N/A	Putative short-chain alcohol dehydrogenase/3-hydroxyacyl-coa dehydrogenase (Fragment) OS	Rhipicephalus pulchellus PE	TRUE	6.24073	0.00078	268441	240961	266033	240585	7878.46	3935.66	27480.4	1.11405	0.0469027	0.89763	-0.155808
649	709	tr|A0A131Z103|A0A131Z103_RHIAP	N/A	N/A	Uncharacterized protein OS	Rhipicephalus appendiculatus PE	TRUE	-6.24188	0.00078	89215.4	162259	93439.9	166514	10151.4	21088.3	-73043.9	0.549832	-0.25977	1.81874	0.862936
650	734	tr|C9W1F7|C9W1F7_RHISA	N/A	N/A	F1F0-type ATP synthase subunit G OS	Rhipicephalus sanguineus PE	TRUE	-6.23015	0.00079	134928	174759	135999	177640	7999.47	9975.07	-39830.8	0.772082	-0.112337	1.2952	0.373175
651	1019	tr|A0A1E1XV93|A0A1E1XV93_9ACAR	N/A	N/A	Putative secreted peptide (Fragment) OS	Amblyomma sculptum PE	TRUE	-6.18692	0.00082	17097.1	235332	9736.9	264921	17482	68346.6	-218235	0.0726512	-1.13876	13.7644	3.78287
652	958	tr|L7LRB1|L7LRB1_9ACAR	N/A	N/A	Putative group ii salivary lipocalin OS	Rhipicephalus pulchellus PE	TRUE	6.16277	0.00084	56746.3	37627.5	58056.3	37609.7	6136.72	915.387	19118.8	1.50811	0.178432	0.663082	-0.59274
653	481	tr|A0A131XDY8|A0A131XDY8_9ACAR	N/A	N/A	Putative small heat shock protein ii OS	Hyalomma excavatum PE	TRUE	6.10538	0.00088	199851	162293	198808	164387	10639.2	6178.62	37557.6	1.23142	0.0904057	0.812071	-0.300321
654	486	tr|L7MAH9|L7MAH9_9ACAR	N/A	N/A	Succinyl-CoA:3-ketoacid-coenzyme A transferase OS	Rhipicephalus pulchellus PE	TRUE	-6.0985	0.00089	97668.6	173158	109106	173798	23191.9	8661.94	-75489.5	0.564043	-0.248688	1.77291	0.826123
655	871	tr|G3MLM7|G3MLM7_9ACAR	N/A	N/A	Uncharacterized protein OS	Amblyomma maculatum PE	TRUE	-6.03446	0.00094	203414	291462	197253	292896	27783.3	8924.58	-88047.4	0.697911	-0.1562	1.43285	0.518885
656	833	tr|G3MIA7|G3MIA7_9ACAR	N/A	N/A	Uncharacterized protein (Fragment) OS	Amblyomma maculatum PE	TRUE	5.99361	0.00097	33174.3	16579.1	33656.8	16104.4	4278.81	3515.27	16595.2	2.00097	0.301241	0.499757	-1.0007
657	591	tr|L7M6B8|L7M6B8_9ACAR	N/A	N/A	Putative 26s proteasome regulatory complex subunit rpn11 OS	Rhipicephalus pulchellus PE	TRUE	5.95859	0.001	210591	172224	208888	168905	4648.24	12009.9	38367.4	1.22278	0.087347	0.817811	-0.29016
658	309	tr|G3MMT5|G3MMT5_9ACAR	N/A	N/A	Uncharacterized protein OS	Amblyomma maculatum PE	TRUE	5.94997	0.00101	2.45723e+06	1.50947e+06	2.47479e+06	1.36799e+06	74166.7	309823	947760	1.62788	0.211622	0.614297	-0.702992
659	952	tr|L7M3Y3|L7M3Y3_9ACAR	N/A	N/A	Uncharacterized protein OS	Rhipicephalus pulchellus PE	TRUE	-5.93265	0.00102	7811.3	31986.4	7893.05	31399.4	4568.35	6749.08	-24175.1	0.244207	-0.612242	4.09489	2.03382
660	1015	tr|L7MMU0|L7MMU0_9ACAR	N/A	N/A	Galectin (Fragment) OS	Rhipicephalus pulchellus PE	TRUE	-5.90599	0.00105	87554	104732	88214.9	104888	2453.3	5274.45	-17177.8	0.835983	-0.0778027	1.1962	0.258455
661	303	tr|A0A224Z940|A0A224Z940_9ACAR	N/A	N/A	Thioredoxin OS	Rhipicephalus zambeziensis PE	TRUE	5.8827	0.00107	252476	142932	262817	152490	25996.5	26668.5	109544	1.76641	0.247091	0.566121	-0.820818
662	746	tr|L7MEP4|L7MEP4_9ACAR	N/A	N/A	Putative phosphoglucomutase/phosphomannomutase (Fragment) OS	Rhipicephalus pulchellus PE	TRUE	5.86172	0.00109	89321.3	71952.1	88211.2	71418.6	3592.44	4713.31	17369.1	1.2414	0.0939111	0.805543	-0.311966
663	173	tr|A0A131YX76|A0A131YX76_RHIAP	N/A	N/A	Cysteine proteinase OS	Rhipicephalus appendiculatus PE	TRUE	-5.85167	0.0011	1.5273e+06	2.35066e+06	1.54087e+06	2.40762e+06	108548	259633	-823362	0.649732	-0.187266	1.5391	0.622084
664	284	tr|A0A224Z7S1|A0A224Z7S1_9ACAR	N/A	N/A	Thioredoxin/protein disulfide isomerase OS	Rhipicephalus zambeziensis PE	TRUE	5.85206	0.0011	338676	213888	354507	218520	40329.8	13868.3	124788	1.58343	0.199599	0.631541	-0.663053
[truncated: 414 more rows]

## Sheet: OVER MG I
Row	Index	Peak Name	m/z	Ret. Time	Group	SPECIES	Use	t-value	p-value	Mean 1	Mean 2	Median 1	Median 2	Sigma 1	Sigma 2	Delta	Fold Change	Log (Fold Change)	Fold Change (RsJ/RsS)	Log (Fold Change)
[truncated: 446 more rows]

[truncated: 1 more sheets: UNDER MG I]
