# Supplementary material for: Comparative Proteomic Analysis of Rhipicephalus sanguineus sensu lato (Acari: Ixodidae) Tropical and Temperate Lineages: Uncovering Differences During Ehrlichia canis Infection
Source: Front Cell Infect Microbiol. 2021 Jan 29;10:611113. doi: 10.3389/fcimb.2020.611113 (PMC7879575; doi:10.3389/fcimb.2020.611113)
Supplement: Supplementary Table 5 — Proteins identified only in E. canis infected SG of the R. sanguineus tropical lineage vs. temperate lineage. [file Table_5.xlsx]

## Sheet: SIG SG INF NO MATCH
ABC	UNIPROT	Group	p-value	Fold Change	Log (Fold Change)	BP	MF	CC
C9W1K5_RHISA	C9W1K5	Putative cement protein (Fragment) OS	2.3471e-07	514.16	9.00607	x	x	C:integral component of membrane (GO:0016021)
C9W1A6_RHISA	C9W1A6	Putative cement protein (Fragment) OS	2.7714e-06	424.404	8.7293	x	x	C:integral component of membrane (GO:0016021)
B7P5Q1_IXOSC	B7P5Q1	Cuticle protein, putative OS	1.035e-08	81.5973	6.35045	x	structural constituent of cuticule (GO:0042302)	C:extracellular space (GO:0005615)
A0A131XLJ3_9ACAR	A0A131XLJ3	Putative transglutaminase/protease-like protein OS	8.3808e-08	34.2625	5.09856	P:proteolysis (GO:0006508), peptide cross-linking (GO:0018149)	F:protein-glutamine gamma-glutamyltransferase activity (:GO:0003810), F:metal ion binding (GO:0046872), F:peptidase activity (GO:0008233)
A0A224YL44_9ACAR	A0A224YL44	TIL domain containing protein OS	2.1822e-08	29.3146	4.87355	P:chitin metabolic process ( P:GO:0006030)	F:chitin binding (F:GO:0008061)	C:extracellular region ( C:GO:0005576)
B7PEW1_IXOSC	B7PEW1	Cytochrome b-c1 complex subunit 6 OS	8.6591e-05	17.7735	4.15165	P:hydrogen ion transmembrane transport (GO:1902600), mitochondrial electron transport, ubiquinol to cytochrome c (GO:0006122)	F:ubiquinol-cytochrome-c reductase activity (GO:0008121)	C:respiratory chain (GO:0070469), respiratory inner membrane (GO:0005743)
C9W1N5_RHISA	C9W1N5	Secreted protein OS	1.2322e-07	17.5822	4.13604	non annotated	non annotated	non annotated
A0A224Z454_9ACAR	A0A224Z454	Nidogen OS	3.4373e-08	15.522	3.95624	x	F:calcium ion binding (GO:0005509), extracellular matrix structural constituent (GO:0005201)	x
L7LTS4_9ACAR	L7LTS4	Putative monotil peptide OS	1.3159e-05	11.414	3.51273	x	x	C:integral component of membrane (GO:0016021)
Q8MTY1_RHIAP	Q8MTY1	Putative cement protein RIM36 OS	0.02398	10.065	3.33128	x	x	C:integral component of membrane (GO:0016021)
A0A224YGN2_9ACAR	A0A224YGN2	Ixoderin OS	6.1975e-11	9.13108	3.19078	non annotated	non annotated	non annotated
L7LVH9_9ACAR	L7LVH9	Histone H3 OS	0.00013	8.29051	3.05146	x	DNA binding (GO:0003677), protein heterodimerization activity (GO:0046982)	C:nucleus (GO:0005634), nucleosome (GO:0000786)
A0A224YYK7_9ACAR	A0A224YYK7	Salivary sulfotransferase OS	7.6267e-06	7.80153	2.96376	x	sulfotransferase activity (GO:0008146)
L7M9R9_9ACAR	L7M9R9	Putative dnaj domain prokaryotic heat shock protein OS	1.2036e-05	7.76666	2.9573	P:cell redox homeostasis (GO:0045454)	x	Cell (GO:0005623)
A0A131XYD6_IXORI	A0A131XYD6	Isocitrate dehydrogenase [NAD] subunit, mitochondrial OS	0.00635	7.16927	2.84183	P:tricarboxylic acid cycle (GO:0006099)	F:magnesium ion binding (GO:0000287), isocitrate dehydrogenase (NAD+) activity (GO:0004449), NAD binding (GO:0051287)	x
L7M6B6_9ACAR	L7M6B6	Histone H3 OS	0.03415	6.89793	2.78616	x	DNA binding (GO:0003677), protein heterodimerization activity (GO:0046982)	C:nucleus (GO:0005634), nucleosome (GO:0000786)
A0A224YSP8_9ACAR	A0A224YSP8	LIM domain-containing protein OS	0.00132	6.64117	2.73144	P:regulation of nucleobase-containing compound metabolic process (GO:0019219), RNA metabolic process (GO:0016070), biosynthetic process (GO:0009058)	F:transcription cofactor activity (GO:0003712), metal ion binding (GO:0046872)	C:cytoplasm (GO:0005737)
C9W1E6_RHISA	C9W1E6	Putative cement protein OS	7.4775e-08	6.4738	2.69461	x	x	C:integral component of membrane (GO:0016021)
A0A224Y7Y3_9ACAR	A0A224Y7Y3	Uncharacterized protein OS	3.884e-05	6.25549	2.64512	non annotated	non annotated	non annotated
A0A131Z9A0_RHIAP	A0A131Z9A0	BIGH3 (Fragment) OS	1.3829e-08	5.78971	2.53349	P:cell proliferation (GO:0008283), P:extracellular matrix organization (GO:0030198), cell adhesion (GO:0007155), muscle fiber development (GO:0048747)	F:extracellular matrix binding (GO:0050840), collagen binding (GO:0005518), integrin binding (GO:0005178)	C:extracellular space (GO:0005615), extracellular matrix (GO:0031012)
A0A023GKA4_9ACAR	A0A023GKA4	Putative ubiquinol cytochrome c reductase subunit qcr2 OS	7.1361e-05	4.51572	2.17496	x	F:metal ion binding (GO:0046872), catalytic activity (GO:0003824)	x
A0A224Z7X3_9ACAR	A0A224Z7X3	Vesicle fusing atpase 2 OS	0.00577	4.01516	2.00546	P:SNARE complex disassembly (GO:0035494)	F:ATPase activity (GO:0016887), ATP binding (GO:0005524)	x
V5I2Q5_IXORI	V5I2Q5	Putative g-protein alpha subunit (Fragment) OS	0.00024	3.9532	1.98302	P:G-protein coupled receptor signaling pathway (GO:0007186)	F:GTP binding (GO:0005525), G-protein coupled receptor binding (GO:0001664), GTPase activity (GO:0003924), G-protein beta/gamma-subunit complex binding (GO:0031683), signal transducer activity (GO:0004871)	x
A0A131Z235_RHIAP	A0A131Z235	Carboxylic ester hydrolase OS	7.8408e-06	3.83798	1.94035	x	F:cholinesterase activity (GO:0004104)	x
L7MAW2_9ACAR	L7MAW2	Uncharacterized protein OS	9.9856e-06	3.69193	1.88437	P:oxidation-reduction process (GO:0055114)	F:acyl-CoA dehydrogenase activity (GO:0003995), flavin adenine dinucleotide binding (GO:0050660)	x
L7ME67_9ACAR	L7ME67	Putative glycine rich protein (Fragment) OS	7.5286e-06	3.50509	1.80945	x	F:nucleotide binding (GO:0000166), nucleic acid binding (GO:0003676), zinc ion binding (GO:0008270)	x
A0A131XM47_9ACAR	A0A131XM47	NADH dehydrogenase [ubiquinone] flavoprotein 1, mitochondrial OS	2.0699e-06	3.39181	1.76205	P:oxidation-reduction process (GO:0055114)	F:FMN binding (GO:0010181), NAD binding (GO:0051287), NADH dehydrogenase (ubiquinone) activity (GO:0008137), 4 iron, 4 sulfur cluster binding (GO:0051539)	x
L7LS09_9ACAR	L7LS09	Putative bitil peptide OS	6.0031e-07	3.32257	1.7323	x	x	C:integral component of membrane (GO:0016021)
L7M132_9ACAR	L7M132	Uncharacterized protein OS	1.1134e-08	3.16981	1.6644	P:protein methylation (GO:0006479)	F:methyltransferase activity (GO:0008168)	x
A0A224Y3V0_9ACAR	A0A224Y3V0	Glycine rich superfamily member OS	0.00093	2.88271	1.52742	x	F:nucleotide binding (GO:0000166), nucleic acid binding (GO:0003676), zinc ion binding (GO:0008270)	C:membrane (GO:0016020)
A0A224Z3B3_9ACAR	A0A224Z3B3	V-type H+-transporting ATPase subunit B OS	0.00167	2.79777	1.48428	P:ATP hydrolysis coupled proton transport (GO:0015991), ATP metabolic process (GO:0046034),	F:ATP binding (GO:0005524)	C:proton-transporting V-type ATPase, V1 domain (GO:0033180)
A0A224YXN0	Q86G64	40S ribosomal protein S5 OS	0.01496	2.7837	1.477	P:translation (GO:0006412)	F:RNA binding (GO:0003723), structural constituent of ribosome (GO:0003735)	C:small ribosomal subunit (GO:0015935)
A0A224YPY7_9ACAR	A0A224YPY7	2-oxoglutarate dehydrogenase E2 component (Dihydrolipoamide succinyltransferase) OS	0.0002	2.74028	1.45432	P:tricarboxylic acid cycle (GO:0006099)	F:dihydrolipoyllysine-residue succinyltransferase activity (GO:0004149)	C:oxoglutarate dehydrogenase complex (GO:0045252)
A0A224YG77_9ACAR	A0A224YG77	26S proteasome regulatory subunit N10 OS	0.00074	2.59586	1.37621	x	x	C:proteasome complex (GO:0000502)
B7QJ07_IXOSC	B7QJ07	Uncharacterized protein OS	2.6546e-06	2.54533	1.34785	P:chitin metabolic process (GO:0006030)	F:chitin binding (GO:0008061)	C:extracellular region ( C:GO:0005576)
A0A131XGU0_9ACAR	A0A131XGU0	Putative translation initiation factor 2c eif-2c (Fragment) OS	3.4558e-08	2.48737	1.31462	P:gene silencing by RNA (GO:0031047), translational initiation (GO:0006413)	F:translation initiation factor activity (GO:0003743)	x
C9W1U0_RHISA	C9W1U0	Putative cement protein (Fragment) OS	1.2104e-06	2.4645	1.30129	x	x	C:integral component of membrane (GO:0016021)
A0A224YVZ3_9ACAR	A0A224YVZ3	Collagen type IV alpha OS	2.4541e-08	2.4077	1.26765	x	F:extracellular matrix structural constituent (GO:0005201)	C:collagen trimer (GO:0005581)
A0A224YUP2_9ACAR	A0A224YUP2	Collagen type IV alpha OS	4.3574e-09	2.33777	1.22513	x	F:extracellular matrix structural constituent (GO:0005201)	C:collagen trimer (GO:0005581)
G3MLX1_9ACAR	G3MLX1	Uncharacterized protein OS	2.7424e-06	2.33222	1.2217	P:transmembrane transport (GO:0055085)	F:transmembrane transporter activity (GO:0022857)	C:integral component of membrane (GO:0016021)
A0A224YLA3_9ACAR	A0A224YLA3	Uncharacterized protein OS	2.9973e-06	2.33204	1.22159	non annotated	non annotated	non annotated
A0A224YEW2_9ACAR	A0A224YEW2	Glycine rich superfamily member (Fragment) OS	4.356e-06	2.24047	1.1638	x	F:nucleotide binding (GO:0000166), nucleic acid binding (GO:0003676), zinc ion binding (GO:0008270)	C:membrane (GO:0016020)
A0A224Z4I9_9ACAR	A0A224Z4I9	Mitochondrial-processing peptidase subunit beta OS	1.5386e-06	2.14065	1.09805	P:protein processing involved in protein targeting to mitochondrion (GO:0006627), cation transport (GO:0006812), oxidative phosphorylation (GO:0006119), respiratory electron transport chain (GO:0022904), biosynthetic process (GO:0009058)	F:metal ion binding (GO:0046872), metalloendopeptidase activity (GO:0004222)	C:mitochondrial processing peptidase complex (GO:0017087), mitochondrial inner membrane (GO:0005743)
A0A1E1XGR0_9ACAR	A0A1E1XGR0	Putative synaptic vesicle protein synapsin (Fragment) OS	2.2188e-08	2.13883	1.09682	P:neurotransmitter secretion (GO:0007269)	F:ATP binding (GO:0005524)	C:synaptic vesicle (GO:0008021)
A0A224Z9I0_9ACAR	A0A224Z9I0	Succinate dehydrogenase [ubiquinone] flavoprotein subunit, mitochondrial OS	1.1756e-07	2.11588	1.08126	P:tricarboxylic acid cycle (GO:0006099), electron transport chain (GO:0022900)	F:oxidoreductase activity (GO:0016627), flavin adenine dinucleotide binding (GO:0050660)	C:mitochondrial inner membrane (GO:0005743)
A0A131ZCD0_RHIAP	A0A131ZCD0	Lipoprotein amino terminal region (Fragment) OS	0.00072	2.11416	1.08009	P:lipid transport (GO:0006869)	F:lipid transporter activity (GO:0005319)	x
A0A224YEL2_9ACAR	A0A224YEL2	Glycine rich superfamily member OS	0.04946	2.09614	1.06773	x	F:nucleotide binding (GO:0000166), nucleic acid binding (GO:0003676), zinc ion binding (GO:0008270)	C:membrane (GO:0016020)
A0A224Z3Y0_9ACAR	A0A224Z3Y0	RNA-binding protein Musashi OS	5.1254e-07	2.08563	1.06049	x	F:RNA binding (GO:0003723)	x
A0A131XL63_9ACAR	A0A131XL63	Putative 3-oxoacyl coa thiolase (Fragment) OS	0.00631	2.07163	1.05077	P:metabolic process (GO:0008152)	F:transferase activity, transferring acyl groups other than amino-acyl groups (GO:0016747)	x
L7MAQ1_9ACAR	L7MAQ1	Putative cytochrome b-c1 complex subunit 2 mitochondrial OS	1.9106e-05	2.05042	1.03592	x	F:catalytic activity (GO:0003824), metal ion binding (GO:0046872)	x
A0A224Z9G4_9ACAR	A0A224Z9G4	Sulfotransferase OS	2.5821e-06	1.97984	0.985381	x	F:transferase activity (GO:0016740)	x
A0A224YW31_9ACAR	A0A224YW31	Erythrocyte membrane protein 1 (Fragment) OS	7.7618e-08	1.97121	0.97908	x	F: nucleic acid binding (GO:0003676)	x
B7P858_IXOSC	B7P858	Low-density lipoprotein receptor, putative OS	2.8637e-06	1.95037	0.963749	non annotated	non annotated	non annotated
L7MF58_9ACAR	L7MF58	Putative emp24/gp25l/p24 family of membrane trafficking (Fragment) OS	6.3661e-05	1.93566	0.952824	P:vesicle-mediated transport (GO:0016192), intracellular protein transport (GO:0006886), organelle organization (GO:0006996), regulation of biological process (GO:0050789), response to stimulus (GO:0050896)	x	C:integral component of membrane (GO:0016021), cytoplasmic vesicle (GO:0031410), Golgi apparatus (GO:0005794), endoplasmic reticulum (GO:0005783)
L7M2X3_9ACAR	L7M2X3	Putative mitochondrial electron transport nadh to ubiquinone OS	2.5445e-06	1.92264	0.943088	P:mitochondrial electron transport, NADH to ubiquinone (GO:0006120)	F:NADH dehydrogenase (ubiquinone) activity (GO:0008137)	C:integral component of membrane (GO:0016021), mitochondrial inner membrane (GO:0005743)
Q4R0Q2_9ACAR	Q4R0Q2	cAMP-dependent protein kinase catalytic subunit OS	6.7796e-05	1.90104	0.926785	P:protein phosphorylation (GO:0006468)	F:ATP binding (GO:0005524), protein serine/threonine kinase activity (GO:0004674)	x
L7MAK0_9ACAR	L7MAK0	Putative acetyl-coa hydrolase OS	5.1129e-07	1.89891	0.925171	P:acetyl-CoA metabolic process (GO:0006084)	F:hydrolase activity (GO:0016787)	x
A0A023FIT8_9ACAR	A0A023FIT8	Putative myosin regulatory light chain ixodes scapularis myosin regulatory light chain (Fragment) OS	0.04431	1.8965	0.92334	x	F:calcium ion binding (GO:0005509)	x
A0A131YF72_RHIAP	A0A131YF72	Glycine rich superfamily member OS	4.3043e-07	1.86291	0.89756	x	F:nucleotide binding (GO:0000166), nucleic acid binding (GO:0003676), zinc ion binding (GO:0008270)	C:membrane (GO:0016020)
L7M4W5_9ACAR	L7M4W5	60S ribosomal protein L13 OS	2.0872e-06	1.84923	0.886923	P:translation (GO:0006412)	F:structural constituent of ribosome (GO:0003735)	C:ribosome (GO:0005840)
A0A0C9R303_AMBAM	A0A0C9R303	Putative hnrnp-l/ptb/hephaestus splicing factor family (Fragment) OS	1.8244e-05	1.83917	0.879052	P:mRNA processing (GO:0006397)	F:nucleotide binding (GO:0000166), RNA binding (GO:0003723)	C:nucleus (GO:0005634), nucleosome (GO:0000786)
A0A224YQG5_9ACAR	A0A224YQG5	Glutamine synthetase OS	1.1825e-05	1.83853	0.878551	P:glutamine biosynthetic process (GO:0006542)	F: ATP binding (GO:0005524), glutamate-ammonia ligase activity (GO:0004356)	x
A0A131XAX9_9ACAR	A0A131XAX9	Putative nadh-ubiquinone oxidoreductase ndufs1/75 kDa subunit OS	6.4816e-08	1.82509	0.867971	P:ATP synthesis coupled electron transport (GO:0042773)	electron carrier activity (GO:0009055), NADH dehydrogenase (ubiquinone) activity (GO:0008137), iron-sulfur cluster binding (GO:0051536)	C:membrane (GO:0016020)
L7M6Q0_9ACAR	L7M6Q0	Eukaryotic translation initiation factor 5A OS	1.1827e-05	1.80241	0.849926	P:positive regulation of translational termination (GO:0045905), translational frameshifting (GO:0006452) , translational initiation (GO:0006413), positive regulation of translational elongation (GO:0045901)	F:translation initiation factor activity (GO:0003743), translation elongation factor activity (GO:0003746), ribosome binding (GO:0043022)	x
Q4U334_DERVA	Q4U334	40S ribosomal protein S24 OS	7.3253e-05	1.76645	0.820854	P:translation (GO:0006412)	F:nucleotide binding (GO:0000166), structural constituent of ribosome (GO:0003735)	C:ribosome (GO:0005840)
A0A023FKJ8_9ACAR	A0A023FKJ8	Putative ca2+/calmodulin-dependent protein (Fragment) OS	0.0259	1.74132	0.800181	P:protein phosphorylation (GO:0006468)	F:ATP binding (GO:0005524), protein serine/threonine kinase activity (GO:0004674)	x
A0A224YP86_9ACAR	A0A224YP86	H/ACA ribonucleoprotein complex subunit OS	0.00043	1.74037	0.799398	P:pseudouridine synthesis (GO:0001522), rRNA processing (GO:0006364)	F:RNA binding (GO:0003723)	C:box H/ACA snoRNP complex (GO:0031429)
L7LZK9_9ACAR	L7LZK9	Putative translocon-associated complex trap delta subunit OS	1.5322e-07	1.73707	0.796654	x	x	C:integral component of membrane (GO:0016021), endoplasmic reticulum (GO:0005783)
A0A147BP26_IXORI	A0A147BP26	Putative secreted protein OS	5.5415e-07	1.7003	0.765787	non annotated	non annotated	non annotated
A0A131YW86_RHIAP	A0A131YW86	Fasciclin domain containing protein OS	0.00091	1.6953	0.761538	non annotated	non annotated	non annotated
L7M6B8_9ACAR	L7M6B8	Putative 26s proteasome regulatory complex subunit rpn11 OS	0.00543	1.64375	0.716988	P:protein K63-linked deubiquitination (GO:0070536)	F:Lys63-specific deubiquitinase activity (GO:0061578)	C:proteasome complex (GO:0000502)
C9W1L7_RHISA	C9W1L7	60S ribosomal protein L9 OS	1.3155e-05	1.63972	0.713447	P:translation (GO:0006412)	F:structural constituent of ribosome (GO:0003735), rRNA binding (GO:0019843)	C:ribosome (GO:0005840)
L7M621_9ACAR	L7M621	Putative translocon-associated protein OS	4.7829e-07	1.62123	0.697086	x	x	C:endoplasmic reticulum membrane (GO:0005789), integral component of membrane (GO:0016021)
A0A224Z0W8_9ACAR	A0A224Z0W8	Large subunit ribosomal protein L8e OS	2.7139e-07	1.607	0.68437	P:translation (GO:0006412)	F:structural constituent of ribosome (GO:0003735), rRNA binding (GO:0019843)	C:large ribosomal subunit (GO:0015934)
B7PNL8_IXOSC	B7PNL8	Cysteine proteinase, putative (Fragment) OS	8.1829e-06	1.59937	0.6775	P:cell adhesion (GO:0007155), proteolysis involved in cellular protein catabolic process (GO:0051603)	F:cysteine-type endopeptidase activity (GO:0004197)	C:extracellular space (GO:0005615), lysosome (GO:0005764)
L7ML89_9ACAR	L7ML89	40S ribosomal protein S26 (Fragment) OS	0.01673	1.58622	0.665591	P:translation (GO:0006412)	F:nucleotide binding (GO:0000166), structural constituent of ribosome (GO:0003735)	C:ribosome (GO:0005840)
A0A224YID5_9ACAR	A0A224YID5	40S ribosomal protein S7 OS	1.265e-05	1.58508	0.664554	P:translation (GO:0006412)	F:nucleotide binding (GO:0000166), structural constituent of ribosome (GO:0003735)	C:ribosome (GO:0005840)
Q4PM27_IXOSC	Q4PM27	Ribosomal protein L11 OS	4.734e-06	1.56803	0.648954	P:translation (GO:0006412), ribosomal large subunit assembly (GO:0000027)	F:nucleotide binding (GO:0000166), structural constituent of ribosome (GO:0003735)	C:cytosolic large ribosomal subunit (GO:0022625)
L7M3F0_9ACAR	L7M3F0	Uncharacterized protein OS	5.6853e-07	1.56321	0.644514	non annotated	non annotated	non annotated
A0A0C9RSH1_AMBAM	A0A0C9RSH1	Putative ribosomal protein s15aa (Fragment) OS	6.9839e-06	1.53524	0.618466	P:translation (GO:0006412)	F:nucleotide binding (GO:0000166), structural constituent of ribosome (GO:0003735)	C:ribosome (GO:0005840)
A0A131Z5W2_RHIAP	A0A131Z5W2	NADH dehydrogenase (Ubiquinone) 1 alpha subcomplex subunit 9 OS	0.00013	1.53391	0.617211	x	F:coenzyme binding (GO:0050662), catalytic activity (GO:0003824)	x
L7MG30_9ACAR	L7MG30	Uncharacterized protein (Fragment) OS	1.2981e-05	1.51029	0.59483	non annotated	non annotated	non annotated
A0A224YRZ4_9ACAR	A0A224YRZ4	Isocitrate dehydrogenase [NAD] subunit, mitochondrial OS	4.4052e-06	1.50791	0.592546	P:tricarboxylic acid cycle (GO:0006099)	F:magnesium ion binding (GO:0000287), isocitrate dehydrogenase (NAD+) activity (GO:0004449), NAD binding (GO:0051287)	C:mitochondrion (GO:0005739)
A0A224Z3G3_9ACAR	A0A224Z3G3	V-type H+-transporting ATPase subunit A OS	0.00045	1.48748	0.572871	P:ATP metabolic process (GO:0046034), hydrogen ion transmembrane transport (GO:1902600)	F:ATP binding (GO:0005524), proton-transporting ATPase activity, rotational mechanism (GO:0046961)	C:proton-transporting V-type ATPase, V1 domain (GO:0033180)
G3MMF8_9ACAR	G3MMF8	Uncharacterized protein OS	1.7342e-05	1.48622	0.571649	P:oxidation-reduction process (GO:0055114)	F:NADH dehydrogenase (ubiquinone) activity (GO:0008137)	x
A0A224YTJ8_9ACAR	A0A224YTJ8	Ankyrin OS	2.9229e-05	1.47929	0.564909	P:iron ion homeostasis (GO:0055072), monovalent inorganic cation transport (GO:0015672),signal transduction (GO:0007165), positive regulation of organelle organization	F:protein phosphatase binding (GO:0019903), cytoskeletal adaptor activity (GO:0008093), ion channel binding (GO:0044325), ATPase binding (GO:0051117)	C:cytoplasmic side of plasma membrane (GO:0009898), nucleus (GO:0005634), cytoplasm (GO:0005737), spectrin-associated cytoskeleton (GO:0014731)
A0A131XJV6_9ACAR	A0A131XJV6	Putative glutamate/leucine/phenylalanine/valine dehydrogenase OS	1.6422e-06	1.47474	0.560462	P:cellular amino acid metabolic process (GO:0006520), oxidation-reduction process (GO:0055114)	F:oxidoreductase activity, acting on the CH-NH2 group of donors, NAD or NADP as acceptor (GO:0016639)	x
L7MMU0_9ACAR	L7MMU0	Galectin (Fragment) OS	0.00028	1.47407	0.55981	P:negative regulation of gene expression (GO:0010629), inflammatory response (GO:0006954), positive regulation of gene expression (GO:0010628), positive regulation of I-kappaB kinase/NF-kappaB signaling (GO:0043123)	F:disaccharide binding (GO:0048030), galactose binding (GO:0005534), enzyme binding (GO:0019899)	x
V5HC22_IXORI	V5HC22	40S ribosomal protein S6 OS	0.00027	1.47263	0.558399	P:translation (GO:0006412)	F:nucleotide binding (GO:0000166), structural constituent of ribosome (GO:0003735)	C:ribosome (GO:0005840)
A0A131YXB1_RHIAP	A0A131YXB1	ATP-dependent RNA helicase DDX3X OS	0.00413	1.46995	0.555767	x	F:nucleic acid binding, (GO:0003676) ATP binding (GO:0005524), helicase activity (GO:0004386)	x
A0A224YU18_9ACAR	A0A224YU18	Crystallin alpha B OS	0.00188	1.46713	0.552992	P:microtubule polymerization or depolymerization (GO:0031109), tubulin complex assembly (GO:0007021), multicellular organism aging (GO:0010259), regulation of cell death (GO:0010941)	F:microtubule binding (GO:0008017)	x
A0A1E1WXN0_9ACAR	A0A1E1WXN0	Uncharacterized protein (Fragment) OS	0.00213	1.45894	0.544925	non annotated	non annotated	non annotated
G3MQM7_9ACAR	G3MQM7	Uncharacterized protein OS	0.00283	1.45451	0.540529	non annotated	non annotated	non annotated
L7M4U7_9ACAR	L7M4U7	Eukaryotic translation initiation factor 3 subunit F OS	0.00101	1.4337	0.519743	P:formation of translation preinitiation complex (GO:0001731), regulation of translational initiation (GO:0006446)	F:translation initiation factor activity (GO:0003743)	C:eukaryotic 43S preinitiation complex (GO:0016282), eukaryotic 48S preinitiation complex (GO:0033290), eukaryotic translation initiation factor 3 complex (GO:0005852)
Q6X4V4_RHIMP	Q6X4V4	Actin OS	0.00017	1.43035	0.516369	x	F:ATP binding (GO:0005524)	x
A0A224YC84_9ACAR	A0A224YC84	Adducin OS	0.00015	1.42466	0.510614	P:multicellular organism growth (GO:0035264), positive regulation of establishment of endothelial barrier (GO:1903142), positive regulation of protein binding (GO:0032092), cell morphogenesis (GO:0000902), cell volume homeostasis (GO:0006884), hemoglobin metabolic process (GO:0020027), barbed-end actin filament capping (GO:0051016), erythrocyte differentiation (GO:0030218), homeostasis of number …	F:protein homodimerization activity (GO:0042803), structural molecule activity (GO:0005198), transcription factor binding (GO:0008134), actin filament binding (GO:0051015), spectrin binding (GO:0030507), protein heterodimerization activity (GO:0046982)
L7LRH1_9ACAR	L7LRH1	Putative glycine rich protein OS	0.01497	1.41844	0.504308	x	F:nucleotide binding (GO:0000166), nucleic acid binding (GO:0003676), zinc ion binding (GO:0008270)	C:membrane (GO:0016020)
A0A1E1XH73_9ACAR	A0A1E1XH73	Putative cysteine s-methyltransferase (Fragment) OS	1.517e-06	1.41153	0.497258	P:methionine biosynthetic process (GO:0009086), methylation (GO:0032259)	F:zinc ion binding (GO:0008270), betaine-homocysteine S-methyltransferase activity (GO:0047150)	C:cytoplasm (GO:0005737)
A0A131XR05_9ACAR	A0A131XR05	Putative 60s ribosomal protein l4 (Fragment) OS	0.02993	1.38545	0.470359	P:translation (GO:0006412)	F:structural constituent of ribosome (GO:0003735), rRNA binding (GO:0019843)	C:large ribosomal subunit (GO:0015934)
A0A131Z7V1_RHIAP	A0A131Z7V1	Ribosomal protein OS	7.1066e-05	1.383	0.467802	P:translation (GO:0006412)	F:structural constituent of ribosome (GO:0003735), rRNA binding (GO:0019843)	C:large ribosomal subunit (GO:0015934)
L7M116_9ACAR	L7M116	Putative calcium/calmodulin-dependent protein kinase ii OS	0.00033	1.36527	0.449184	P:protein phosphorylation (GO:0006468	F:ATP binding (GO:0005524), calmodulin binding (GO:0005516), calmodulin-dependent protein kinase activity (GO:0004683)	x
A0A023FWK0_9ACAR	A0A023FWK0	Putative ribosomal protein l24 OS	0.00018	1.36335	0.447151	P:translation (GO:0006412)	F:nucleotide binding (GO:0000166), structural constituent of ribosome (GO:0003735)	C:ribosome (GO:0005840)
A0A131Z0E6_RHIAP	A0A131Z0E6	Aconitate hydratase, mitochondrial OS	0.00561	1.33936	0.42154	P:tricarboxylic acid cycle (GO:0006099)	F:metal ion binding (GO:0046872), 4 iron, 4 sulfur cluster binding (GO:0051539), aconitate hydratase activity (GO:0003994)	x
V5I0X4_IXORI	V5I0X4	Putative 60s ribosomal protein l23 apis mellifera OS	7.5422e-05	1.33202	0.413618	P:translation (GO:0006412)	F:structural constituent of ribosome (GO:0003735), rRNA binding (GO:0019843)	C:large ribosomal subunit (GO:0015934)
A0A131Z6W5_RHIAP	A0A131Z6W5	NADH dehydrogenase (Ubiquinone) 1 alpha subcomplex subunit 6 OS	7.2271e-05	1.32854	0.409838	P:oxidative phosphorylation (GO:0006119), respiratory electron transport chain (GO:0022904)	F:oxidoreductase activity (GO:0016491)	x
A0A131YR43_RHIAP	A0A131YR43	Lectin, mannose-binding 1 OS	0.00016	1.31779	0.39812	P:ER to Golgi vesicle-mediated transport (GO:0006888)	F:mannose binding (GO:0005537)	C:integral component of membrane (GO:0016021)
L7M1F0_9ACAR	L7M1F0	Putative camp-dependent protein kinase r2 OS	1.0535e-06	1.31586	0.396009	P:regulation of protein kinase activity (GO:0045859)	F:cAMP binding (GO:0030552), cAMP-dependent protein kinase regulator activity (GO:0008603), kinase activity (GO:0016301)	C:cAMP-dependent protein kinase complex
A0A224YZ31_9ACAR	A0A224YZ31	Alpha-1,4 glucan phosphorylase OS	2.9582e-05	1.31578	0.39592	P:carbohydrate metabolic process (GO:0005975)	F:glycogen phosphorylase activity (GO:0008184), pyridoxal phosphate binding (GO:0030170)	x
L7M437_9ACAR	L7M437	Proteasome subunit beta type OS	0.02407	1.30847	0.387885	P:proteolysis involved in cellular protein catabolic process (GO:0051603)	F:threonine-type endopeptidase activity (GO:0004298)	C:nucleus (GO:0005634), cytoplasm (0005737), proteasome core complex (GO:0005839)
A0A131XF26_9ACAR	A0A131XF26	Dihydrolipoamide acetyltransferase component of pyruvate dehydrogenase complex OS	0.01477	1.30102	0.37964	P:metabolic process (GO:0008152)	F:transferase activity, transferring acyl groups (GO:0016746)	x
L7LWF2_9ACAR	L7LWF2	Putative nadh:ubiquinone oxidoreductase ndufs2/49 kDa subunit OS	0.02379	1.29644	0.37455	P:oxidation-reduction process (GO:0055114)	F:quinone binding (GO:0048038), NAD binding (GO:0051287), oxidoreductase activity, acting on NAD(P)H (GO:0016651)	x
L7M2C1_9ACAR	L7M2C1	Putative prohibitin OS	1.8038e-05	1.29157	0.369124	P:cell cycle (GO:0007049)	x	C:membrane (GO:0016020)
F0JAD9_AMBVA	F0JAD9	Cytochrome b-c1 complex subunit 7 OS	0.00464	1.28707	0.364096	P:mitochondrial electron transport, ubiquinol to cytochrome c (GO:0006122)	x	C:mitochondrial respiratory chain complex III (GO:0005750)
L7M706_9ACAR	L7M706	Putative oligomycin sensitivity-conferring protein OS	3.3593e-05	1.28514	0.361926	P:ATP hydrolysis coupled cation transmembrane transport (GO:0099132), ATP synthesis coupled proton transport (GO:0015986)	F:proton-transporting ATP synthase activity, rotational mechanism (GO:0046933)	x
A0A0K8RPZ5_IXORI	A0A0K8RPZ5	40S ribosomal protein S8 (Fragment) OS	0.00019	1.28362	0.360222	P:translation (GO:0006412), ribosomal large subunit assembly (GO:0000027)	F:nucleotide binding (GO:0000166), structural constituent of ribosome (GO:0003735)	C:cytosolic large ribosomal subunit (GO:0022625)
A0A224Z7D1_9ACAR	A0A224Z7D1	Pyruvate dehydrogenase E1 component beta subunit OS	0.00863	1.27655	0.352251	P:acetyl-CoA biosynthetic process from pyruvate (GO:0006086), glycolytic process (GO:0006096)	F:pyruvate dehydrogenase (acetyl-transferring) activity (GO:0004739)	C:mitochondrial pyruvate dehydrogenase complex (GO:0005967), mitochondrial nucleoid (GO:0042645)
L7LX53_9ACAR	L7LX53	Putative low-density lipoprotein receptor domain class a OS	0.00034	1.27507	0.350578	x	x	C:integral component of membrane (GO:0016021)
A0A224YTK8_9ACAR	A0A224YTK8	Mitochondrial 2-oxoglutarate/malate carrier protein OS	0.00015	1.24801	0.319631	P:transmembrane transport (GO:0055085)	F:transmembrane transporter activity (GO:0022857)	C:membrane (GO:0016020)
A0A224Z0G4_9ACAR	A0A224Z0G4	Heterogeneous nuclear ribonucleoprotein U-like protein 1 OS	4.8723e-06	1.24551	0.316736	P:mRNA splicing, via spliceosome (GO:0000398)	F:RNA binding (GO:0003723), enzyme binding (GO:0019899)	x
A0A131YYS7_RHIAP	A0A131YYS7	ATP synthase subunit beta OS	0.00017	1.24502	0.316167	P:ATP hydrolysis coupled proton transport (GO:0015991), ATP synthesis coupled proton transport (GO:0015986)	F:ATP binding (GO:0005524), proton-transporting ATP synthase activity, rotational mechanism (GO:0046933)	C:proton-transporting two-sector ATPase complex, catalytic domain (GO:0033178)
Q4PMD3_IXOSC	Q4PMD3	40S ribosomal protein S10 OS	6.1883e-06	1.24486	0.315984	P:translation (GO:0006412)	F:nucleotide binding (GO:0000166), structural constituent of ribosome (GO:0003735)	C:ribosome (GO:0005840)
G3MMA7_9ACAR	G3MMA7	Uncharacterized protein OS	0.00263	1.24233	0.313044	non annotated	non annotated	non annotated
L7M444_9ACAR	L7M444	Putative secreted protein OS	0.00042	1.23926	0.309479	non annotated	non annotated	non annotated
L7M5Q2_9ACAR	L7M5Q2	Putative vamp vesicle-associated membrane protein-associated protein a OS	0.03043	1.2369	0.306731	P:endoplasmic reticulum unfolded protein response (GO:0030968), cellular calcium ion homeostasis (GO:0006874)	x	C:endoplasmic reticulum membrane (GO:0005789), integral component of membrane (GO:0016021), Golgi apparatus (GO:0005794)
A0A224YWZ5_9ACAR	A0A224YWZ5	DnaJ-like protein subfamily A member 1 OS	0.01138	1.23413	0.303495	P:response to heat (GO:0009408), protein folding (GO:0006457)	F:ATP binding (GO:0005524), metal ion binding (GO:0046872)	x
A0A131XJZ4_9ACAR	A0A131XJZ4	Cytochrome b-c1 complex subunit 7 OS	4.8296e-05	1.22488	0.292636	P:mitochondrial electron transport, ubiquinol to cytochrome c (GO:0006122)	x	C:mitochondrial respiratory chain complex III (GO:0005750)
L7M801_9ACAR	L7M801	Putative translocase of outer membrane 40 OS	0.00925	1.22165	0.288825	P:protein import into mitochondrial matrix (GO:0030150)	F:protein transmembrane transporter activity (GO:0008320)	C:mitochondrial outer membrane (GO:0005741)
L7M227_9ACAR	L7M227	T-complex protein 1 subunit gamma OS	0.03747	1.21954	0.286336	P:protein folding (GO:0006457)	F:ATP binding (GO:0005524), unfolded protein binding (GO:0051082)	C:cytoplasm (GO:0005737)
A0A131YI91_RHIAP	A0A131YI91	Cuticle protein OS	0.00026	1.19924	0.262123	x	F:structural constituent of cuticle (GO:0042302)	x
Q7YW74_9ACAR	Q7YW74	Cathepsin L-like cysteine proteinase B OS	0.01487	1.18872	0.24941	P:proteolysis (GO:0006508)	F:cysteine-type peptidase activity (GO:0008234)	x
L7M9V8_9ACAR	L7M9V8	Putative proline and glutamine-rich splicing factor sfpq OS	7.1408e-05	1.18662	0.246862	x	F:nucleotide binding (GO:0000166), nucleic acid binding (GO:0003676), zinc ion binding (GO:0008270)	x
L7M6A6_9ACAR	L7M6A6	Profilin OS	0.00159	1.18615	0.246285	x	F:actin binding (GO:0003779)	x
L7MJ32_9ACAR	L7MJ32	Putative ribosomal protein l17 (Fragment) OS	3.1843e-05	1.17725	0.235425	P:translation (GO:0006412)	F:nucleotide binding (GO:0000166), structural constituent of ribosome (GO:0003735)	C:large ribosomal subunit (GO:0015934)
V5HZY4_IXORI	V5HZY4	Putative transcriptional activator protein (Fragment) OS	0.01693	1.16997	0.226475	P:nitrogen compound metabolic process (GO:0006807), biosynthetic process (GO:0009058),cellular process (GO:0009987)	F:double-stranded DNA binding (GO:0003690), RNA polymerase II transcription factor activity, sequence-specific DNA binding (GO:0000981)	C:nucleus (GO:0005634)
L7M720_9ACAR	L7M720	Putative heat shock protein OS	0.00069	1.15875	0.212569	P:chaperone mediated protein folding requiring cofactor (GO:0051085), response to cadmium ion (GO:0046686), protein refolding (GO:0042026), response to virus (P:GO:0009615), response to unfolded protein (GO:0006986), response to heat (GO:0009408)	F:protease binding (GO:0002020), ATPase activity, coupled (GO:0042623), heat shock protein binding (GO:0031072), ATP binding (GO:0005524), protein binding involved in protein folding (GO:0044183)	C:nucleus (GO:0005634), cytoplasm (GO:0005737), cell wall (GO:0005618)
A0A131XI55_9ACAR	A0A131XI55	Putative f0f1-type atp synthase gamma subunit OS	0.00337	1.15064	0.202433	P:ATP synthesis coupled proton transport (GO:0015986)	F:proton-transporting ATPase activity (GO:0046961), rotational mechanism, proton-transporting ATP synthase activity, rotational mechanism (GO:0046933)	C:proton-transporting ATP synthase complex, catalytic core F(1) (GO:0045261)
V5HUX3_IXORI	V5HUX3	Putative 60s ribosomal protein l38 OS	0.00466	1.14502	0.195371	P:translation (GO:0006412)	F:nucleotide binding (GO:0000166), structural constituent of ribosome (GO:0003735)	C:ribosome (GO:0005840)
A0A131YGT1_RHIAP	A0A131YGT1	Myosin heavy chain 6/7 OS	0.01882	1.14455	0.194783	x	F:actin filament binding (GO:0051015), ATP binding (GO:0005524), motor activity (:GO:0003774)	C:myosin complex (GO:0016459)
A0A131YVP0_RHIAP	A0A131YVP0	Spectrin beta chain OS	0.03075	1.13661	0.184731	x	F:actin binding (GO:0003779), structural constituent of cytoskeleton (GO:0005200), phospholipid binding (GO:0005543)	C:spectrin (GO:0008091)
A0A131YDG8_RHIAP	A0A131YDG8	Cuticular protein OS	0.00096	1.13238	0.179357	x	F:structural constituent of cuticle (GO:0042302)	x
V5HKJ7_IXORI	V5HKJ7	Putative 40s ribosomal protein OS	0.00695	1.13191	0.178763	P:translation (GO:0006412)	F:nucleotide binding (GO:0000166), structural constituent of ribosome (GO:0003735)	C:ribosome (GO:0005840)
L7M7C9_9ACAR	L7M7C9	Putative ras-related protein OS	0.02244	1.06854	0.0956353	P:small GTPase mediated signal transduction (GO:0007264)	F:GTP binding (GO:0005525)	C:membrane (GO:0016020), intracellular (GO:0005622)
A0A224Z6N2_9ACAR	A0A224Z6N2	Regulatory protein mlp OS	0.01429	0.940869	-0.0879338	x	F:metal ion binding (GO:0046872)	x
A0A1E1XM49_9ACAR	A0A1E1XM49	Putative netrin axonal chemotropic factor (Fragment) OS	0.03513	0.933239	-0.0996812	P:regulation of embryonic development (GO:0045995), regulation of cell adhesion (GO:0030155), regulation of cell migration (GO:0030334)	F:receptor binding (GO:0005102)	x
A0A224Z0L0_9ACAR	A0A224Z0L0	Histone H1/5 OS	0.02933	0.916809	-0.125307	P:nucleosome assembly (GO:0006334)	F:DNA binding (GO:0003677)	C:nucleus (GO:0005634), nucleosome (GO:0000786)
A0A224YSF8_9ACAR	A0A224YSF8	Large subunit ribosomal protein L31e OS	0.04207	0.914612	-0.128769	P:translation (GO:0006412)	F:nucleotide binding (GO:0000166), structural constituent of ribosome (GO:0003735)	C:ribosome (GO:0005840)
L7M432_9ACAR	L7M432	Histone H2A OS	0.00035	0.900538	-0.151141	P:nucleosome assembly (GO:0006334)	F:DNA binding (GO:0003677)	C:nucleus (GO:0005634), nucleosome (GO:0000786)
L7M3R3_9ACAR	L7M3R3	Putative cargo transport protein OS	0.01141	0.895816	-0.158726	P:transport (GO:0006810)	x	C:integral component of membrane (GO:0016021)
A0A224YW23_9ACAR	A0A224YW23	Poly [ADP-ribose] polymerase OS	0.02639	0.891452	-0.165771	P:protein ADP-ribosylation (GO:0006471)	F:DNA binding (GO:0003677), zinc ion binding (GO:0008270), NAD binding (GO:0051287), NAD+ ADP-ribosyltransferase activity (GO:0003950)	C:nucleus (GO:0005634)
A0A131XI81_9ACAR	A0A131XI81	Aspartate aminotransferase OS	0.002	0.88994	-0.16822	P:L-serine biosynthetic process (GO:0006564)	F:O-phospho-L-serine:2-oxoglutarate aminotransferase activity (GO:0004648)	x
L7M7W1_9ACAR	L7M7W1	Coatomer subunit delta OS	0.00431	0.880439	-0.183705	P:retrograde vesicle-mediated transport, Golgi to ER (GO:0006890), protein transport (GO:0015031)	x	C:COPI vesicle coat (GO:0030126)
L7M4S4_9ACAR	L7M4S4	Putative secreted protein OS	0.00567	0.850989	-0.232787	non annotated	non annotated	non annotated
A0A131YZI8_RHIAP	A0A131YZI8	Dihydropyrimidinase OS	0.0004	0.83881	-0.253584	x	F:hydrolase activity, acting on carbon-nitrogen (but not peptide) bonds (GO:0016810)	C:cytoplasm (GO:0005737)
C9W1P7_RHISA	C9W1P7	ATP synthase H+ transporting mitochondrial F1 complex delta subunit OS	0.00112	0.834821	-0.260461	P:ATP synthesis coupled proton transport (GO:0015986)	F:proton-transporting ATPase activity, rotational mechanism (GO:0046961), proton-transporting ATP synthase activity, rotational mechanism (GO:0046933)	C:proton-transporting ATP synthase complex, catalytic core F(1)	(GO:0045261)
A0A224Z9V2_9ACAR	A0A224Z9V2	Transitional endoplasmic reticulum ATPase OS	0.00029	0.829801	-0.269162	x	F:ATP binding (GO:0005524), hydrolase activity (GO:0016787)	x
L7M861_9ACAR	L7M861	Putative tropomodulin OS	0.01756	0.823312	-0.280488	P:pointed-end actin filament capping (GO:0051694)	F:tropomyosin binding (GO:0005523)	x
A0A1E1XN62_9ACAR	A0A1E1XN62	Putative actin-2 (Fragment) OS	0.00149	0.821851	-0.283051	x	F:ATP binding (GO:0005524)	x
A0A131XP13_9ACAR	A0A131XP13	Proteasome subunit beta type (Fragment) OS	0.0002	0.818589	-0.28879	P:proteolysis involved in cellular protein catabolic process (GO:0051603)	F:threonine-type endopeptidase activity (GO:0004298)	C:proteasome core complex (GO:0005839)
L7LYX3_9ACAR	L7LYX3	Putative vesicle coat complex copii subunit sec23 OS	0.00088	0.813842	-0.297179	P:ER to Golgi vesicle-mediated transport (GO:0006888), intracellular protein transport (GO:0006886)	x	C:COPII vesicle coat (GO:0030127)
A0A224Z9U1_9ACAR	A0A224Z9U1	Thymus specific serine protease OS	0.0021	0.800433	-0.321147	P:proteolysis (GO:0006508)	F:serine-type peptidase activity (GO:0008236)	x
A0A023FLK6_9ACAR	A0A023FLK6	Putative neural cell adhesion molecule l1 (Fragment) OS	0.00029	0.797329	-0.326753	x	F:calcium ion binding (GO:0005509)	x
L7MJQ0_9ACAR	L7MJQ0	Serine hydroxymethyltransferase (Fragment) OS	0.02581	0.787115	-0.345354	P:L-serine metabolic process (GO:0006563), tetrahydrofolate interconversion (GO:0035999), glycine metabolic process (GO:0006544), methylation (GO:0032259)	F:pyridoxal phosphate binding (GO:0030170), glycine hydroxymethyltransferase activity (GO:0004372), methyltransferase activity (GO:0008168)	x
A0A224YJ26_9ACAR	A0A224YJ26	Phospholipase A2 OS	0.00092	0.784219	-0.350671	P:arachidonic acid secretion (GO:0050482), phospholipid metabolic process (GO:0006644)	F:phospholipase A2 activity (GO:0004623)	x
L7M2W4_9ACAR	L7M2W4	Putative copper chaperone atox1 copper chaperone atox1 OS	0.00307	0.780359	-0.35779	P:metal ion transport (GO:0030001)	F:metal ion binding (GO:0046872)	x
A0A224YNP1_9ACAR	A0A224YNP1	Glycine rich cell wall structural protein OS	0.00018	0.778216	-0.361758	x	F:nucleotide binding (GO:0000166), nucleic acid binding (GO:0003676), zinc ion binding (GO:0008270)	C:membrane (GO:0016020)
A0A224YXN0_9ACAR	A0A224YXN0	Elongation factor 1-alpha OS	1.7831e-06	0.778076	-0.362017	P:translational elongation (GO:0006414)	F:GTP binding (GO:0005525), translation elongation factor activity (GO:0003746), GTPase activity (GO:0003924)	C:cytoplasm (GO:0005737)
B7PV15_IXOSC	B7PV15	Glyoxylate/hydroxypyruvate reductase, putative OS	0.00079	0.775601	-0.366613	P:oxidation-reduction process (GO:0055114)	F:NAD binding (GO:0051287), hydroxypyruvate reductase activity (GO:0016618), glyoxylate reductase activity (GO:0047964), glyoxylate reductase (NADP) activity (GO:0030267)	C:cytosol (GO:0005829)
A0A131YU14_RHIAP	A0A131YU14	Dihydropyrimidinase OS	0.00028	0.775568	-0.366674	x	F:hydrolase activity, acting on carbon-nitrogen (but not peptide) bonds (GO:0016810)	C:cytoplasm (GO:0005737)
L7MKN4_9ACAR	L7MKN4	Putative hydroxysteroid dehydrogenase-like protein 2 (Fragment) OS	0.00343	0.775011	-0.367711	x	F:DNA binding (GO:0003677)	C:nucleus (GO:0005634)
L7LZX8_9ACAR	L7LZX8	Putative alanine aminotransferase OS	0.00087	0.769197	-0.378575	P:biosynthetic process (GO:0009058)	F:pyridoxal phosphate binding (GO:0030170), transaminase activity (GO:0008483)	x
A0A131XJ32_9ACAR	A0A131XJ32	Putative rna helicase OS	0.00718	0.764767	-0.386907	x	F:nucleic acid binding (GO:0003676), ATP binding (GO:0005524), helicase activity (GO:0004386)	x
A0A224Z539_9ACAR	A0A224Z539	Neurexin iii alpha (Fragment) OS	0.0031	0.76024	-0.395473	P:regulation of embryonic development (GO:0045995), cell adhesion (GO:0007155), regulation of cell migration (GO:0030334)	F:receptor binding (GO:0005102)	x
A0A224YL20_9ACAR	A0A224YL20	Determination of adult lifespan OS	0.04125	0.754312	-0.406766	x	F:calcium ion binding (GO:0005509)	x
A0A131Z4G4_RHIAP	A0A131Z4G4	Prohibitin 2 OS	0.00886	0.742262	-0.429999	x	x	C:membrane (GO:0016020)
A0A131ZDX3_RHIAP	A0A131ZDX3	TIL domain containing protein (Fragment) OS	1.3885e-06	0.740436	-0.433553	P:hydrogen ion transmembrane transport (GO:1902600), mitochondrial electron transport, ubiquinol to cytochrome c (GO:0006122)	F:ubiquinol-cytochrome-c reductase activity (GO:0008121)	C:respiratory chain (GO:0070469), respiratory inner membrane (GO:0005743)
A0A224YT82_9ACAR	A0A224YT82	Filamin OS	1.8073e-07	0.735634	-0.44294	x	F:RNA binding (GO:0003723), actin binding (GO:0003779)	C:filamentous actin (GO:0031941)
L7M7U4_9ACAR	L7M7U4	Proteasome subunit alpha type OS	0.00305	0.734101	-0.44595	P:ubiquitin-dependent protein catabolic process (GO:0006511)	F:threonine-type endopeptidase activity (GO:0004298)	C:nucleus (GO:0005634), cytoplasm (GO:0005737), proteasome core complex, alpha-subunit complex (GO:0019773)
A0A224Z543_9ACAR	A0A224Z543	NADH dehydrogenase (Ubiquinone) Fe-S protein 3 OS	0.03763	0.731963	-0.450158	P:oxidation-reduction process (GO:0055114)	F:NADH dehydrogenase (ubiquinone) activity (GO:0008137)
L7LUH3_9ACAR	L7LUH3	Uncharacterized protein OS	0.00747	0.730142	-0.45375	P:tryptophan catabolic process to kynurenine (GO:0019441)	F:arylformamidase activity (GO:0004061)	x
A0A224YV39_9ACAR	A0A224YV39	Nucleoside diphosphate kinase OS	6.1797e-07	0.726958	-0.460056	P:oxidation-reduction process (GO:0055114	F:NADH dehydrogenase (ubiquinone) activity (GO:0008137)	x
L7M2H2_9ACAR	L7M2H2	Coronin OS	0.00832	0.725629	-0.462696	P:actin cytoskeleton reorganization (GO:0031532	F:actin filament binding (GO:0051015), microtubule binding (GO:0008017), protein binding (GO:0030674)	C:Golgi apparatus (GO:0005794), cytoplasmic microtubule (GO:0005881), actin filament (GO:0005884), plasma membrane (GO:0005886)
L7M7H8_9ACAR	L7M7H8	Putative glyoxalase OS	0.00017	0.722812	-0.468309	non annotated	non annotated	non annotated
L7M8D5_9ACAR	L7M8D5	Putative aldehyde dehydrogenase OS	0.00077	0.722005	-0.46992	P:oxidation-reduction process (GO:0055114)	F:oxidoreductase activity, acting on the aldehyde or oxo group of donors, NAD or NADP as acceptor (GO:0016620)	x
A0A224Z8V8_9ACAR	A0A224Z8V8	SND1 nuclease domain-containing protein 1 OS	7.3818e-05	0.719821	-0.47429	P:gene silencing by RNA (GO:0031047)	x	C:RISC complex (GO:0016442)
A0A1E1XVS1_9ACAR	A0A1E1XVS1	Putative muscle m-line assembly protein unc-89 (Fragment) OS	0.00563	0.719655	-0.474622	P:protein phosphorylation (GO:0006468)	F:ATP binding (GO:0005524), protein serine/threonine kinase activity (GO:0004674)	x
L7M653_9ACAR	L7M653	Uncharacterized protein OS	1.7056e-05	0.718756	-0.476426	P:cell redox homeostasis (GO:0045454)	x	C:cell (GO:0005623)
L7MCR9_9ACAR	L7MCR9	Uncharacterized protein (Fragment) OS	0.01046	0.715455	-0.483067	x	F:selenium binding (GO:0008430)	x
A0A131Y4S1_IXORI	A0A131Y4S1	Putative aconitase/aconitase aconitase superfamily OS	1.4237e-05	0.714097	-0.485808	P:tricarboxylic acid cycle (GO:0006099)	F:4 iron, 4 sulfur cluster binding (GO:0051539), aconitate hydratase activity (GO:0003994)	x
A0A224YTE8_9ACAR	A0A224YTE8	Methylmalonate-semialdehyde dehydrogenase OS	0.00497	0.713014	-0.487998	P:oxidation-reduction process (GO:0055114)	F:oxidoreductase activity, acting on the aldehyde or oxo group of donors, NAD or NADP as acceptor (GO:0016620)	x
A0A131XE97_9ACAR	A0A131XE97	Glycerol-3-phosphate dehydrogenase [NAD(+)] OS	0.00017	0.712293	-0.489457	P:carbohydrate metabolic process (GO:0005975), glycerol-3-phosphate catabolic process (GO:0046168), oxidation-reduction process (GO:0055114)	F:protein homodimerization activity (GO:0042803), NAD binding (GO:0051287), glycerol-3-phosphate dehydrogenase [NAD+] activity (GO:0004367)	C:glycerol-3-phosphate dehydrogenase complex (GO:0009331)
A0A131XD84_9ACAR	A0A131XD84	Putative thioredoxin-like protein OS	0.01169	0.710201	-0.493701	P:cell redox homeostasis (GO:0045454)	F:isomerase activity (GO:0016853)	C:cell (GO:0005623)
A0A224YR66_9ACAR	A0A224YR66	Cytosolic ca2+ dependent cysteine protease OS	3.4913e-05	0.705617	-0.503043	P:proteolysis (GO:0006508)	F:calcium ion binding (GO:0005509), calcium-dependent cysteine-type endopeptidase activity (GO:0004198)	x
L7M8B5_9ACAR	L7M8B5	Putative spliceosome rna helicase ddx39b OS	0.00187	0.70194	-0.51058	x	F:nucleic acid binding (GO:0003676), ATP binding (GO:0005524), helicase activity (GO:0004386)	x
A0A131Z0H3_RHIAP	A0A131Z0H3	Abc transporter OS	0.00058	0.699841	-0.514901	P:cellular iron ion homeostasis (GO:0006879), ion transport (GO:0006811), transmembrane transport (GO:0055085)	F:ATP binding (GO:0005524), ATPase activity, coupled to transmembrane movement of substances (GO:0042626)	C:mitochondrion (GO:0005739)
L7M1V2_9ACAR	L7M1V2	Putative isovaleryl coenzyme a dehydrogenase OS	0.00375	0.695278	-0.524338	P:oxidation-reduction process (GO:0055114)	F:acyl-CoA dehydrogenase activity (GO:0003995), flavin adenine dinucleotide binding (GO:0050660)	x
A0A224ZAJ8_9ACAR	A0A224ZAJ8	Transaldolase OS	0.00332	0.689751	-0.535853	P:carbohydrate metabolic process (GO:0005975), pentose-phosphate shunt (GO:0006098)	F:sedoheptulose-7-phosphate:D-glyceraldehyde-3-phosphate glyceronetransferase activity (GO:0004801)	C:cytoplasm (GO:0005737)
A0A224ZC41_9ACAR	A0A224ZC41	Z band alternatively spliced pdz motif protein 66 OS	4.8041e-06	0.681104	-0.554053	P:myofibril assembly (GO:0030239), mesoderm development (GO:0007498)	F:muscle alpha-actinin binding (GO:0051371), protein phosphatase 1 binding (GO:0008157)	C:Z disc (GO:0030018)
A0A131YE25_RHIAP	A0A131YE25	Annexin OS	2.0038e-06	0.678933	-0.558658	x	F:calcium ion binding (GO:0005509), calcium-dependent phospholipid binding (GO:0005544)	x
A0A224ZAI3_9ACAR	A0A224ZAI3	Transforming growth factor-beta-induced protein OS	0.00253	0.676255	-0.564361	P:cell proliferation (GO:0008283), cell adhesion (GO:0007155)	F:collagen binding (GO:0005518), integrin binding (GO:0005178), extracellular matrix structural constituent (GO:0005201)	x
G3MMB0_9ACAR	G3MMB0	S-(hydroxymethyl)glutathione dehydrogenase OS	0.01526	0.67587	-0.565182	P:ethanol oxidation (GO:0006069)	F:zinc ion binding (GO:0008270), S-(hydroxymethyl)glutathione dehydrogenase activity (GO:0051903)	x
A0A224YJT0_9ACAR	A0A224YJT0	Chorion peroxidase like protein OS	0.0002	0.671199	-0.575188	P:response to oxidative stress (GO:0006979), cellular oxidant detoxification (GO:0098869), oxidation-reduction process (GO:0055114)	F:heme binding (GO:0020037)	x
A0A131YYZ5_RHIAP	A0A131YYZ5	Adenylyl cyclase-associated protein OS	0.00012	0.662674	-0.593629	P:cell morphogenesis (GO:0000902), actin filament organization (GO:0007015)	F:actin binding (GO:0003779)	x
A0A224YYL9_9ACAR	A0A224YYL9	Heat shock 70 kDa protein OS	0.00326	0.659373	-0.600834	P:chaperone mediated protein folding requiring cofactor (GO:0051085), response to cadmium ion (GO:0046686), protein refolding (GO:0042026), response to heat (GO:0009408), response to virus (GO:0009615), response to unfolded protein (GO:0006986)	F:heat shock protein binding (GO:0031072), protease binding (GO:0002020), ATPase activity, coupled (GO:0042623), ATP binding (GO:0005524), protein binding involved in protein folding (GO:0044183)	C:nucleus (GO:0005634), cytoplasm (GO:0005737), cell wall (GO:0005618)
A0A224YSJ3_9ACAR	A0A224YSJ3	Leucine-rich PPR motif-containing protein mitochondrial OS	8.3338e-05	0.658764	-0.602167	P:ER to Golgi vesicle-mediated transport (GO:0006888)	F:mannose binding (GO:0005537)	C:integral component of membrane (GO:0016021)
L7MEG0_9ACAR	L7MEG0	Putative heat shock protein (Fragment) OS	5.5383e-06	0.654513	-0.611507	P:chaperone mediated protein folding requiring cofactor (GO:0051085), response to cadmium ion (GO:0046686), protein refolding (GO:0042026), response to heat (GO:0009408), response to virus (GO:0009615), response to unfolded protein (GO:0006986)	F:heat shock protein binding (GO:0031072), protease binding (GO:0002020), ATPase activity, coupled (GO:0042623), ATP binding (GO:0005524), protein binding involved in protein folding (GO:0044183)	C:nucleus (GO:0005634), cytoplasm (GO:0005737), cell wall (GO:0005618)
L7M8D2_9ACAR	L7M8D2	Putative reticulocalbin calumenin dna supercoiling factor OS	0.00321	0.636819	-0.651046	x	F:calcium ion binding (GO:0005509)	x
A0A224YMH7_9ACAR	A0A224YMH7	Adenylate kinase OS	7.8578e-05	0.633343	-0.658941	P:phosphorylation (GO:0016310), nucleobase-containing compound metabolic process (GO:0006139)	F:ATP binding (GO:0005524), nucleobase-containing compound kinase activity (GO:001920)	x
L7M5R1_9ACAR	L7M5R1	Proteasome subunit alpha type OS	0.00067	0.632808	-0.660161	P:ubiquitin-dependent protein catabolic process (GO:0006511)	F:threonine-type endopeptidase activity (GO:0004298)	C:nucleus (GO:0005634), cytoplasm (GO:0005737), proteasome core complex, alpha-subunit complex (GO:0019773)
A0A131YYU5_RHIAP	A0A131YYU5	Adenylate cyclase terminal differentiation specific OS	1.0201e-05	0.626881	-0.673737	P:cAMP biosynthetic process (GO:0006171), cytokinin-activated signaling pathway (GO:0009736), phosphorelay signal transduction system (P:GO:0000160), regulation of gene expression (P:GO:001046), phosphorylation (P:GO:0016310)	F:adenylate cyclase activity (GO:0004016), ATP binding (GO:0005524), metal ion binding (GO:0046872), transferase activity, transferring phosphorus-containing groups (F:GO:0016772)	x
G3MSP2_9ACAR	G3MSP2	Uncharacterized protein OS	1.1292e-05	0.623943	-0.680513	non annotated	non annotated	non annotated
L7MDB3_9ACAR	L7MDB3	Malate dehydrogenase (Fragment) OS	5.8596e-07	0.621105	-0.68709	P:carbohydrate metabolic process (GO:0005975), malate metabolic process (GO:0006108), tricarboxylic acid cycle (GO:0006099)	F:L-malate dehydrogenase activity (GO:0030060)	x
A0A224YWL8_9ACAR	A0A224YWL8	Fructose-1,6-bisphosphatase (Fragment) OS	5.2816e-05	0.61878	-0.6925	P:carbohydrate metabolic process (GO:0005975), dephosphorylation (GO:001631)	F:fructose 1,6-bisphosphate 1-phosphatase activity (GO:0042132)	x
A0A131YIS0_RHIAP	A0A131YIS0	Chitin-binding protein OS	2.2785e-07	0.618147	-0.693977	P:chitin metabolic process (GO:0006030)	F:chitin binding (GO:0008061)	C:extracellular region (GO:0005576)
A0A224YNG9_9ACAR	A0A224YNG9	Glucose-6-phosphate isomerase OS	0.00014	0.614205	-0.703208	P:gluconeogenesis (GO:0006094), glycolytic process (GO:0006096)	F:glucose-6-phosphate isomerase activity (GO:0004347)	x
L7MJF6_9ACAR	L7MJF6	GrpE protein homolog (Fragment) OS	0.0039	0.60881	-0.715935	P:regulation of catalytic activity (GO:0050790), protein folding (GO:0006457)	F:protein homodimerization activity (GO:0042803), adenyl-nucleotide exchange factor activity (GO:0000774), chaperone binding (GO:0051087)	C:mitochondrial matrix (GO:0005759)
C9W1Q2_RHISA	C9W1Q2	Protein disulfide isomerase OS	0.00292	0.60749	-0.719067	P:cell redox homeostasis (GO:0045454)	F:protein disulfide isomerase activity (GO:0003756)	C:cell (GO:0005623)
A0A023FX57_9ACAR	A0A023FX57	Annexin (Fragment) OS	0.0017	0.605172	-0.724582	x	F:calcium ion binding (GO:0005509), calcium-dependent phospholipid binding (GO:0005544)	x
A0A224Z7S1_9ACAR	A0A224Z7S1	Thioredoxin/protein disulfide isomerase OS	2.4271e-05	0.604331	-0.726588	P:cell redox homeostasis (GO:0045454)	F:isomerase activity (GO:0016853)	C:cell (GO:0005623)
L7MKC0_9ACAR	L7MKC0	Putative alternative splicing factor srp20/9g8 rrm superfamily (Fragment) OS	3.949e-07	0.602538	-0.730876	x	F:nucleotide binding (GO:0000166), RNA binding (GO:0003723)	x
A0A224YPE0_9ACAR	A0A224YPE0	Heat shock protein 90kDa beta OS	0.01443	0.594542	-0.750151	P:protein folding (GO:0006457)	F:ATP binding (GO:0005524), double-stranded RNA binding (GO:0003725), unfolded protein binding (GO:0051082)	C:COP9 signalosome (GO:0008180)
L7M6N0_9ACAR	L7M6N0	Putative eukaryotic translation initiation factor OS	0.00012	0.590946	-0.758901	P:translational initiation (GO:0006413)	F:translation initiation factor activity (GO:0003743)	x
A0A224Z4A2_9ACAR	A0A224Z4A2	Phosphoribosylformylglycinamidine synthase OS	0.00864	0.588429	-0.765059	P:'de novo' IMP biosynthetic process (GO:0006189), glutamine metabolic process (GO:0006541)	F:phosphoribosylformylglycinamidine synthase activity (GO:0004642)	x
A0A131YPX6_RHIAP	A0A131YPX6	Metastriate one of each protein family OS	1.9067e-07	0.587675	-0.76691	non annotated	non annotated	non annotated
A0A224Y399_9ACAR	A0A224Y399	Dipeptidyl peptidase 3 OS	0.00788	0.576768	-0.793937	P:proteolysis (GO:0006508)	F:dipeptidyl-peptidase activity (GO:0008239), metallopeptidase activity (GO:0008237)	C:cytoplasm (GO:0005737)
A0A1E1XEH7_9ACAR	A0A1E1XEH7	Glycerol-3-phosphate dehydrogenase [NAD(+)] OS	0.00016	0.575415	-0.797324	P:carbohydrate metabolic process (GO:0005975), glycerol-3-phosphate catabolic process (GO:0046168), oxidation-reduction process (GO:0055114)	F:protein homodimerization activity (GO:0042803), NAD binding (GO:0051287), glycerol-3-phosphate dehydrogenase [NAD+] activity (GO:0004367)	C:glycerol-3-phosphate dehydrogenase complex (GO:0009331)
L7M046_9ACAR	L7M046	Putative cuticular protein OS	5.875e-08	0.57152	-0.807123	P:chitin metabolic process (GO:0006030)	F:chitin binding (GO:0008061)	C:extracellular region (GO:0005576)
L7M2A4_9ACAR	L7M2A4	Putative alpha actinin OS	3.0678e-09	0.566093	-0.820888	x	F:actin binding (GO:0003779), calcium ion binding (GO:0005509)	x
A0A131XBM8_9ACAR	A0A131XBM8	Rab GDP dissociation inhibitor OS	8.9159e-07	0.565576	-0.822208	P:protein transport (GO:0015031), small GTPase mediated signal transduction (GO:0007264), oxidation-reduction process (GO:0055114), positive regulation of GTPase activity (GO:0043547)	F:Rab GDP-dissociation inhibitor activity (GO:0005093), oxidoreductase activity (GO:0016491), GTPase activator activity (GO:0005096)	C:cytoplasm (GO:0005737)
A0A1E1XI57_9ACAR	A0A1E1XI57	Annexin (Fragment) OS	0.03152	0.56237	-0.830407	x	F:calcium ion binding (GO:0005509), calcium-dependent phospholipid binding (GO:0005544)	x
L7MCC0_9ACAR	L7MCC0	Putative heat shock protein (Fragment) OS	0.00023	0.562148	-0.830979	P:chaperone mediated protein folding requiring cofactor (GO:0051085), response to cadmium ion (GO:0046686), protein refolding (GO:0042026), response to heat (GO:0009408), response to virus (GO:0009615), response to unfolded protein (GO:0006986)	F:heat shock protein binding (GO:0031072), protease binding (GO:0002020), ATPase activity, coupled (GO:0042623), ATP binding (GO:0005524), protein binding involved in protein folding (GO:0044183)	C:nucleus (GO:0005634), cytoplasm (GO:0005737), cell wall (GO:0005618)
G3MM77_9ACAR	G3MM77	Uncharacterized protein OS	6.4839e-07	0.558754	-0.839715	P:protein folding (GO:0006457)	F:ATP binding (GO:0005524), unfolded protein binding (GO:0051082)	x
L7M4C6_9ACAR	L7M4C6	Putative ca2+-binding protein OS	0.00017	0.556758	-0.844878	x	F:calcium ion binding (GO:0005509)	x
A0A224YQ72_9ACAR	A0A224YQ72	Gelsolin OS	0.00057	0.555181	-0.848971	x	F:actin filament binding (GO:0051015)	x
L7M6K1_9ACAR	L7M6K1	Uncharacterized protein OS	0.0001	0.544586	-0.876769	P:metabolic process (GO:0008152)	F:catalytic activity (GO:0003824)	x
A0A131Z420_RHIAP	A0A131Z420	Glutathione S-transferase OS	0.00583	0.543848	-0.878726	P:metabolic process (GO:0008152), aromatic amino acid family metabolic process (:GO:0009072)	F:transferase activity (GO:0016740)	C:cytoplasm (GO:0005737)
A0A224YKT1_9ACAR	A0A224YKT1	Cytosol aminopeptidase OS	2.6801e-05	0.540302	-0.888162	P:proteolysis (GO:0006508)	F:metalloexopeptidase activity (GO:0008235), manganese ion binding (GO:0030145), aminopeptidase activity (GO:0004177)	C:cytoplasm (GO:0005737)
A0A131Z2K3_RHIAP	A0A131Z2K3	Uncharacterized protein OS	2.1383e-07	0.526901	-0.924397	non annotated	non annotated	non annotated
A0A131XNG6_9ACAR	A0A131XNG6	Glyceraldehyde-3-phosphate dehydrogenase OS	0.00186	0.523171	-0.934644	P:oxidation-reduction process (GO:0055114), glucose metabolic process (GO:0006006)	F:NADP binding (GO:0050661), NAD binding (GO:0051287), glyceraldehyde-3-phosphate dehydrogenase (NAD+) (phosphorylating) activity (GO:0004365)	x
L7MAQ2_9ACAR	L7MAQ2	Putative glycine rich protein (Fragment) OS	8.8162e-07	0.515913	-0.9548	x	F:nucleotide binding (GO:0000166), nucleic acid binding (GO:0003676), zinc ion binding (GO:0008270)	C:membrane (GO:0016020)
A0A224YVX6_9ACAR	A0A224YVX6	Trifunctional purine biosynthetic protein adenosine-3 OS	9.4494e-05	0.512829	-0.963451	P:'de novo' IMP biosynthetic process (GO:0006189), purine nucleobase biosynthetic process (GO:0009113), phosphoribosylformylglycinamidine cyclo-ligase activity (GO:0004641)	F:ATP binding (GO:0005524), phosphoribosylglycinamide formyltransferase activity (GO:0004644), metal ion binding (GO:0046872), phosphoribosylamine-glycine ligase activity (GO:0004637)	x
A0A224YIR8_9ACAR	A0A224YIR8	Uncharacterized protein OS	3.6728e-05	0.509756	-0.97212	non annotated	non annotated	non annotated
A0A023FXY9_9ACAR	A0A023FXY9	Putative hydroxyacyl-coa dehydrogenase/enoyl-coa hydratase OS	3.175e-08	0.507803	-0.977659	P:fatty acid beta-oxidation (GO:0006635)	F:3-hydroxyacyl-CoA dehydrogenase activity (GO:0003857), enoyl-CoA hydratase activity (GO:0004300)	C:mitochondrial fatty acid beta-oxidation multienzyme complex (GO:0016507)
A0A224YM81_9ACAR	A0A224YM81	Elongation factor 1-delta OS	0.00034	0.5061	-0.982506	P:translational elongation (GO:0006414)	F:translation elongation factor activity (GO:0003746)	C:eukaryotic translation elongation factor 1 complex (GO:0005853)
A0A224YCS2_9ACAR	A0A224YCS2	Metallopeptidase OS	0.00074	0.501996	-0.994251	non annotated	non annotated	non annotated
A0A224Z0H9_9ACAR	A0A224Z0H9	RNA-binding protein LARK OS	0.00032	0.501328	-0.996174	x	F:RNA binding (GO:0003723)	x
L7MFB1_9ACAR	L7MFB1	Putative transcription factor l2 (Fragment) OS	1.7249e-05	0.495768	-1.01226	x	F:zinc ion binding (GO:0008270)	x
A0A034WXN6_RHIMP	A0A034WXN6	Hemelipoprotein HeLp 2 (Fragment) OS	5.024e-09	0.493344	-1.01933	P:lipid transport (GO:0006869)	F:lipid transporter activity (GO:0005319)	x
L7MM36_9ACAR	L7MM36	Putative short-chain alcohol dehydrogenase/3-hydroxyacyl-coa dehydrogenase (Fragment) OS	2.6035e-05	0.492219	-1.02263	P:oxidation-reduction process (GO:0055114)	F:oxidoreductase activity (GO:001649)	x
A0A023FQ51_9ACAR	A0A023FQ51	Transgelin (Fragment) OS	0.0024	0.486381	-1.03984	P:actin filament organization (GO:0007015), chronological cell aging (GO:0001300)	F:actin filament binding (GO:0051015), protein binding, bridging (GO:003067)	C:actin cortical patch (GO:0030479)
A0A131YMB0_RHIAP	A0A131YMB0	PDZ and LIM domain protein Zasp OS	7.4161e-07	0.477682	-1.06588	x	F:zinc ion binding (GO:0008270)	x
A0A224YS01_9ACAR	A0A224YS01	Alpha-B-crystallin OS	0.02173	0.476205	-1.07035	P:protein folding (GO:0006457), response to stress (GO:000695)	x	x
B7P6R8_IXOSC	B7P6R8	Secreted inorganic pyrophosphatase, putative (Fragment) OS	0.00011	0.473166	-1.07958	P:phosphate-containing compound metabolic process (GO:0006796)	F:magnesium ion binding (GO:0000287), inorganic diphosphatase activity (GO:0004427)	C:cytoplasm (GO:0005737)
A0A224YMP8_9ACAR	A0A224YMP8	Aldehyde reductase OS	1.7091e-05	0.468479	-1.09394	P:oxidation-reduction process (GO:0055114)	F:oxidoreductase activity (GO:0016491)	x
L7M073_9ACAR	L7M073	Putative heteroproteinous nuclear ribonucleoprotein r rrm superfamily OS	7.7349e-06	0.464667	-1.10573	x	F:nucleotide binding (GO:0000166), nucleic acid binding (GO:0003676)	C:intracellular ribonucleoprotein complex (GO:0030529), viral nucleocapsid (GO:0019013)
G3MN31_9ACAR	G3MN31	Uncharacterized protein OS	7.6773e-07	0.460766	-1.11789	P:translational elongation (GO:0006414)	F:structural constituent of ribosome (GO:0003735)	C:ribosome (GO:0005840)
L7LRY7_9ACAR	L7LRY7	Putative tick salivary serpin OS	1.5667e-05	0.460288	-1.11939	x	x	C:extracellular space (GO:0005615)
A0A131X8H2_9ACAR	A0A131X8H2	Peptidylprolyl isomerase OS	0.00014	0.459024	-1.12336	P:protein folding (GO:0006457)	F:isomerase activity (GO:0016853)	x
A0A224Z659_9ACAR	A0A224Z659	Phosphoribosylaminoimidazolecarboxamide formyltransferase / IMP cyclohydrolase OS	0.00021	0.45732	-1.12873	P:purine nucleotide biosynthetic process (GO:0006164)	F:IMP cyclohydrolase activity (GO:0003937), phosphoribosylaminoimidazolecarboxamide formyltransferase activity (GO:0004643)	x
A0A131Z012_RHIAP	A0A131Z012	Sepiapterin reductase OS	3.1813e-05	0.451952	-1.14576	P:tetrahydrobiopterin biosynthetic process (GO:0006729), oxidation-reduction process (GO:0055114)	F:sepiapterin reductase activity (GO:0004757)	x
L7M7B2_9ACAR	L7M7B2	Putative metalloexopeptidase OS	2.9713e-07	0.448168	-1.15789	P:proteolysis (GO:0006508)	F:dipeptidase activity (GO:0016805), tripeptidase activity (GO:0034701), metallopeptidase activity (GO:0008237)	x
A0A224Z4V4_9ACAR	A0A224Z4V4	Calponin OS	8.0596e-10	0.446526	-1.16319	P:actomyosin structure organization (GO:0031032)	F:actin binding (GO:0003779)	x
A0A224Z295_9ACAR	A0A224Z295	Protein disulfide-isomerase OS	2.7703e-08	0.445259	-1.16728	P:cell redox homeostasis (GO:0045454)	F:protein disulfide isomerase activity (GO:0003756)	C:cell (GO:0005623)
A0A131YFY5_RHIAP	A0A131YFY5	Glutathione S-transferase OS	2.2855e-07	0.437358	-1.19311	x	F:transferase activity (GO:0016740)	x
A0A023GF67_9ACAR	A0A023GF67	Ubiquitin carboxyl-terminal hydrolase OS	0.0048	0.430094	-1.21728	P:ubiquitin-dependent protein catabolic process (GO:0006511)	F:thiol-dependent ubiquitin-specific protease activity (GO:0004843)	C:intracellular (GO:0005622)
M1H857_RHIAP	M1H857	Ferritin OS	3.9557e-07	0.430089	-1.21729	P:cellular iron ion homeostasis (GO:0006879), iron ion transport (GO:0006826), oxidation-reduction process (GO:0055114)	F:ferric iron binding (GO:0008199), ferroxidase activity (GO:0004322)	C:cell (GO:0005623)
L7MMT8_9ACAR	L7MMT8	Putative tick thioester protein (Fragment) OS	5.3438e-05	0.429049	-1.22079	P:negative regulation of endopeptidase activity (GO:0010951)	F:endopeptidase inhibitor activity (GO:0004866)	C:extracellular space (GO:0005615)
A0A131YSR5_RHIAP	A0A131YSR5	Vitellogenin B OS	4.9393e-06	0.426644	-1.2289	P:lipid transport (GO:0006869)	F:lipid transporter activity (GO:0005319)	x
A0A023FNM2_9ACAR	A0A023FNM2	Putative alpha-2-macroglobulin-like protein OS	1.0871e-07	0.426324	-1.22998	P:negative regulation of endopeptidase activity (GO:0010951)	F:endopeptidase inhibitor activity (GO:0004866)	C:extracellular space (GO:0005615)
A0A224ZAU6_9ACAR	A0A224ZAU6	Triosephosphate isomerase OS	2.9068e-07	0.420139	-1.25106	P:gluconeogenesis (GO:0006094), glycolytic process (GO:0006096)	F:triose-phosphate isomerase activity (GO:0004807)	x
Q2VMW1_DERAN	Q2VMW1	Histamine release factor OS	4.6582e-06	0.41663	-1.26316	x	F:calcium ion binding (GO:0005509)	C:cytoplasm (GO:0005737)
A0A1E1X5I9_9ACAR	A0A1E1X5I9	Putative fumarylacetoacetase OS	0.01738	0.415922	-1.26561	P:aromatic amino acid family metabolic process (GO:0009072)	F:fumarylacetoacetase activity (GO:0004334)	x
A0A224YPN9_9ACAR	A0A224YPN9	Carbonyl reductase 1 OS	0.00204	0.413409	-1.27436	P:epithelial cell differentiation (GO:0030855), cyclooxygenase pathway (GO:0019371), drug metabolic process (GO:0017144), oxidation-reduction process (GO:0055114)	F:carbonyl reductase (NADPH) activity (GO:0004090), 15-hydroxyprostaglandin dehydrogenase (NADP+) activity (GO:0047021), oxidoreductase activity, acting on NAD(P)H, quinone or similar compound as acceptor (GO:0016655)	C:extracellular exosome (GO:0070062), cytosol (GO:0005829)
A0A034WXH1_RHIMP	A0A034WXH1	Vitellogenin 5 (Fragment) OS	0.00853	0.409059	-1.28962	P:lipid transport (GO:0006869)	F:lipid transporter activity (GO:0005319)	x
A0A224YSE4_9ACAR	A0A224YSE4	ATP-dependent 6-phosphofructokinase OS	9.453e-05	0.405979	-1.30052	P:fructose 6-phosphate metabolic process (GO:0006002), glycolytic process through fructose-6-phosphate (GO:0061615)	F:ATP binding (GO:0005524), metal ion binding (GO:0046872), 6-phosphofructokinase activity (GO:0003872)	C:cytoplasm (GO:0005737)
A0A131YQ21_RHIAP	A0A131YQ21	Glutathione S-transferase OS	1.0348e-08	0.402049	-1.31456	x	F:transferase activity (GO:0016740)	x
A0A224YT49_9ACAR	A0A224YT49	Aldehyde dehydrogenase OS	5.333e-08	0.400779	-1.31912	P:oxidation-reduction process (GO:0055114)	F:oxidoreductase activity, acting on the aldehyde or oxo group of donors, NAD or NADP as acceptor (GO:0016620)	x
B5ABL8_DERVA	B5ABL8	Hemelipoglycoprotein 2 (Fragment) OS	0.04876	0.399643	-1.32322	P:lipid transport (GO:0006869)	F:lipid transporter activity (GO:0005319)	x
A0A023GL48_9ACAR	A0A023GL48	Putative aldehyde dehydrogenase OS	1.9233e-07	0.397874	-1.32962	P:oxidation-reduction process (GO:0055114)	F:oxidoreductase activity, acting on the aldehyde or oxo group of donors, NAD or NADP as acceptor (GO:0016620)	x
A0A224YSV1_9ACAR	A0A224YSV1	Alpha-L-fucosidase OS	0.00997	0.397138	-1.33229	P:fucose metabolic process (GO:0006004)	F:alpha-L-fucosidase activity (GO:0004560)	x
A0A131YVE7_RHIAP	A0A131YVE7	Calponin OS	2.7891e-07	0.394415	-1.34221	P:actomyosin structure organization (GO:0031032)	F:actin binding (GO:0003779)	x
A0A224YNS0_9ACAR	A0A224YNS0	Serine protease inhibitor OS	3.33e-05	0.388181	-1.3652	P:proteolysis (GO:0006508)	F:peptidase activity (GO:0008233)	C:extracellular space (GO:0005615)
A0A224YXN2_9ACAR	A0A224YXN2	Ras-related protein Rab-1A OS	0.01714	0.372215	-1.42579	P:vesicle transport along microtubule (GO:0047496), ER to Golgi vesicle-mediated transport (GO:0006888), autophagosome assembly (GO:000004), intracellular protein transport (GO:0006886), endocytosis (GO:0006897), cell migration (GO:0016477), defense response to bacterium (GO:0042742)	F:GTP binding (GO:0005525), protein binding (GO:0005515), GTPase activity (GO:0003924)	x
A0A1E1WZ73_9ACAR	A0A1E1WZ73	Putative atp synthase d chain (Fragment) OS	4.5126e-05	0.369075	-1.43801	P:ATP synthesis coupled proton transport (GO:0015986)	F:hydrogen ion transmembrane transporter activity (GO:0015078)	C:mitochondrial proton-transporting ATP synthase complex, coupling factor F(o) (GO:0000276)
A0A224YCP5_9ACAR	A0A224YCP5	Glycine rich superfamily member OS	4.9952e-05	0.363537	-1.45983	x	F:nucleotide binding (GO:0000166), nucleic acid binding (GO:0003676), zinc ion binding (GO:0008270)	C:membrane (GO:0016020)
A0A224Z2W7_9ACAR	A0A224Z2W7	Large subunit ribosomal protein LP1 OS	8.3134e-09	0.363308	-1.46074	P:translational elongation (GO:0006414)	F:structural constituent of ribosome (GO:0003735)	C:ribosome (GO:0005840)
L7MGQ7_9ACAR	L7MGQ7	Putative ribose 5-phosphate isomerase (Fragment) OS	4.8166e-05	0.362333	-1.46461	P:pentose-phosphate shunt, non-oxidative branch (GO:0009052)	F:ribose-5-phosphate isomerase activity (GO:0004751)	x
L7LRB1_9ACAR	L7LRB1	Putative group ii salivary lipocalin OS	0.00027	0.35889	-1.47839	P:evasion or tolerance of host defense response (GO:0030682)	F:amine binding (GO:0043176)	x
A0A131YGD2_RHIAP	A0A131YGD2	Glycine rich superfamily member OS	0.00988	0.354644	-1.49556	x	F:nucleotide binding (GO:0000166), nucleic acid binding (GO:0003676), zinc ion binding (GO:0008270)	C:membrane (GO:0016020)
A0A224Z3V5_9ACAR	A0A224Z3V5	M7GpppX diphosphatase OS	0.00671	0.351613	-1.50794	P:deadenylation-dependent decapping of nuclear-transcribed mRNA (GO:0000290)	F:hydrolase activity (GO:0016787)	x
A0A224YGV9_9ACAR	A0A224YGV9	Serine protease inhibitor OS	1.6261e-09	0.350047	-1.51438	P:proteolysis (GO:0006508)	F:peptidase activity (GO:0008233)	C:extracellular space (GO:0005615)
A0A131YWH0_RHIAP	A0A131YWH0	Tick thioester protein OS	3.9413e-07	0.348497	-1.52078	P:negative regulation of endopeptidase activity (GO:0010951)	F:endopeptidase inhibitor activity (GO:0004866)	C:extracellular space (GO:0005615)
A0A131YXW9_RHIAP	A0A131YXW9	Beat protein like 1 OS	7.4017e-09	0.337238	-1.56816	x	x	C:integral component of membrane (GO:0016021)
L7M3V3_9ACAR	L7M3V3	Putative glutathione s-transferase OS	0.02441	0.335839	-1.57416	P:metabolic process (GO:0008152)	F:glutathione transferase activity (GO:0004364)	x
A0A1E1XJX4_9ACAR	A0A1E1XJX4	Putative secreted protein (Fragment) OS	2.284e-09	0.316011	-1.66195	non annotated	non annotated	non annotated
A0A131YYS9_RHIAP	A0A131YYS9	Serpin B OS	2.0094e-07	0.308787	-1.69532	x	x	C:extracellular space (GO:0005615)
A0A1E1X172_9ACAR	A0A1E1X172	Putative dosage compensation complex subunit mle OS	1.664e-08	0.308477	-1.69677	x	F:nucleic acid binding (GO:0003676), ATP binding (GO:0005524), helicase activity (GO:0004386)	x
A0A131YU69_RHIAP	A0A131YU69	Tick thioester protein OS	0.00026	0.295779	-1.75741	P:negative regulation of endopeptidase activity (GO:0010951)	F:endopeptidase inhibitor activity (GO:0004866)	C:extracellular space (GO:0005615)
G3MIA4_9ACAR	G3MIA4	Uncharacterized protein (Fragment) OS	4.1751e-05	0.294641	-1.76297	P:polyamine biosynthetic process (GO:0006596)	F:transferase activity (GO:0016740)	x
Q9XYR3_RHIMP	Q9XYR3	Carboxylesterase-related protein (Fragment) OS	1.513e-06	0.292086	-1.77553	non annotated	non annotated	non annotated
L7M5B2_9ACAR	L7M5B2	Putative nucleoside diphosphate-sugar hydrolase of the mutt nudix family OS	8.3109e-08	0.292046	-1.77573	x	F:hydrolase activity (GO:0016787)	x
G3MIA7_9ACAR	G3MIA7	Uncharacterized protein (Fragment) OS	0.00558	0.290462	-1.78358	x	F:carboxylic ester hydrolase activity (GO:0052689)	C:extracellular region (GO:0005576)
A0A224Y9K2_9ACAR	A0A224Y9K2	Glycine rich superfamily member OS	6.8291e-05	0.290254	-1.78461	x	F:nucleotide binding (GO:0000166), nucleic acid binding (GO:0003676), zinc ion binding (GO:0008270)	C:membrane (GO:0016020)
L7MBH0_9ACAR	L7MBH0	Putative secreted peptide OS	4.3235e-05	0.284516	-1.81342	non annotated	non annotated	non annotated
A0A131XNZ1_9ACAR	A0A131XNZ1	Putative m20 peptidase aminoacylase 1-like protein 2 (Fragment) OS	0.03929	0.283257	-1.81982	x	F:hydrolase activity (GO:0016787)	x
L7MBP6_9ACAR	L7MBP6	Putative pterin carbinolamine dehydratase pcbd/dimerization cofactor of hnf1 (Fragment) OS	9.473e-06	0.276974	-1.85218	P:tetrahydrobiopterin biosynthetic process (GO:0006729)	F:4-alpha-hydroxytetrahydrobiopterin dehydratase activity (GO:0008124)	x
A0A224Z418_9ACAR	A0A224Z418	Phenylpyruvate tautomerase OS	7.2301e-06	0.274073	-1.86737	non annotated	non annotated	non annotated
A0A224YDI8_9ACAR	A0A224YDI8	Glycine rich superfamily member OS	1.4421e-07	0.269588	-1.89117	x	F:nucleotide binding (GO:0000166), nucleic acid binding (GO:0003676), zinc ion binding (GO:0008270)	C:membrane (GO:0016020)
A0A224Z2K0_9ACAR	A0A224Z2K0	Tropomyosin OS	2.4275e-11	0.263711	-1.92297	P:actin filament organization (GO:0007015), muscle filament sliding (GO:0030049)	F:actin filament binding (GO:0051015), structural constituent of muscle (GO:0008307)	x
L7M4E9_9ACAR	L7M4E9	Inositol-1-monophosphatase OS	0.0005	0.262101	-1.9318	P:inositol biosynthetic process (GO:0006021), phosphatidylinositol phosphorylation (GO:0046854), inositol phosphate dephosphorylation (GO:0046855)	F:inositol monophosphate 1-phosphatase activity (GO:0008934), metal ion binding (GO:0046872), inositol monophosphate 3-phosphatase activity (GO:0052832), inositol monophosphate 4-phosphatase activity (GO:0052833)	x
A0A131YHK9_RHIAP	A0A131YHK9	Glutathione S-transferase OS	2.5712e-07	0.249491	-2.00294	P:metabolic process (GO:0008152), aromatic amino acid family metabolic process (:GO:0009072)	F:transferase activity (GO:0016740)	C:cytoplasm (GO:0005737)
A0A131YYA7_RHIAP	A0A131YYA7	Leucyl-tRNA synthetase OS	0.0053	0.249446	-2.0032	P:leucyl-tRNA aminoacylation (GO:0006429), regulation of translational fidelity (GO:0006450)	F:ATP binding (GO:0005524), leucine-tRNA ligase activity (GO:0004823), aminoacyl-tRNA editing activity (GO:0002161)	C:cytoplasm (GO:0005737)
D0E0G4_RHISA	D0E0G4	Putative chitinase OS	0.01096	0.232796	-2.10286	P:carbohydrate metabolic process (GO:0005975), chitin catabolic process (GO:0006032)	F:chitinase activity (GO:0004568)	x
G3MPE6_9ACAR	G3MPE6	Cystatin OS	2.9214e-05	0.230375	-2.11795	P:negative regulation of endopeptidase activity (GO:0010951)	F:cysteine-type endopeptidase inhibitor activity (GO:0004869)	C:intracellular (GO:0005622)
A0A224YZK5_9ACAR	A0A224YZK5	Glutathione s-transferase OS	2.822e-07	0.230094	-2.1197	P:metabolic process (GO:0008152), aromatic amino acid family metabolic process (:GO:0009072)	F:transferase activity (GO:0016740)	C:cytoplasm (GO:0005737)
A0A131YYA2_RHIAP	A0A131YYA2	Isocitrate dehydrogenase [NADP] OS	3.2591e-08	0.216265	-2.20913	P:isocitrate metabolic process (GO:0006102), tricarboxylic acid cycle (GO:0006099)	F:magnesium ion binding (GO:0000287), NAD binding (GO:0051287), isocitrate dehydrogenase (NADP+) activity (GO:0004450)	x
A0A131Z3P7_RHIAP	A0A131Z3P7	Biliverdin reductase / flavin reductase OS	2.5824e-07	0.20849	-2.26195	P:heme catabolic process (GO:0042167), oxidation-reduction process (GO:0055114)	F:riboflavin reductase (NADPH) activity (GO:0042602), biliverdin reductase activity (GO:0004074)	C:plasma membrane (GO:0005886), nucleoplasm (GO:0005654), cytosol (GO:0005829)
L7M6Q8_9ACAR	L7M6Q8	Peptidyl-prolyl cis-trans isomerase OS	5.0673e-08	0.206209	-2.27782	P:protein peptidyl-prolyl isomerization (GO:0000413), protein folding (GO:0006457)	F:peptidyl-prolyl cis-trans isomerase activity (GO:0003755)	x
V5H340_IXORI	V5H340	Putative vitellogenin-1 OS	2.3414e-10	0.203728	-2.29528	P:lipid transport (GO:0006869)	F:lipid transporter activity (GO:0005319)	x
A0A023GM04_9ACAR	A0A023GM04	Putative calpain-a OS	3.8009e-05	0.203245	-2.29871	P:proteolysis (GO:0006508)	F:calcium ion binding (GO:0005509), calcium-dependent cysteine-type endopeptidase activity (GO:0004198)	C:intracellular (GO:0005622)
A0A131XNT8_9ACAR	A0A131XNT8	Putative glutathione s-transferase OS	5.4007e-12	0.200725	-2.31671	P:metabolic process (GO:0008152), aromatic amino acid family metabolic process (:GO:0009072)	F:transferase activity (GO:0016740)	C:cytoplasm (GO:0005737)
A0A224YKL3_9ACAR	A0A224YKL3	Cystathionine gamma-lyase OS	0.00075	0.195743	-2.35297	x	F:pyridoxal phosphate binding (GO:0030170), lyase activity (GO:0016829)	x
Q6JVM9_RHIAP	Q6JVM9	Glutathione S-transferase OS	8.612e-07	0.194237	-2.36411	P:metabolic process (GO:0008152), aromatic amino acid family metabolic process (:GO:0009072)	F:transferase activity (GO:0016740)	C:cytoplasm (GO:0005737)
A0A1E1XNG1_9ACAR	A0A1E1XNG1	Putative diacetyl reductase/l-xylulose reductase (Fragment) OS	6.1709e-10	0.19152	-2.38443	P:oxidation-reduction process (GO:0055114)	F:oxidoreductase activity (GO:0016491)	x
B7S729_RHISA	B7S729	FREP A1 (Fragment) OS	1.9458e-07	0.17462	-2.51771	non annotated	non annotated	non annotated
L7MFD7_9ACAR	L7MFD7	Putative ubiquilin-1 (Fragment) OS	0.00829	0.158861	-2.65416	P:proteolysis (GO:0006508)	x	x
A0A224YIL5_9ACAR	A0A224YIL5	Uncharacterized protein OS	4.6784e-06	0.135756	-2.88091	non annotated	non annotated	non annotated
A0A224YQW1_9ACAR	A0A224YQW1	Serine protease inhibitor OS	5.2065e-12	0.131085	-2.93143	P:proteolysis (GO:0006508)	F:peptidase activity (GO:0008233)	C:extracellular space (GO:0005615)
A0A131YI86_RHIAP	A0A131YI86	Cystatin-A/B OS	7.0137e-07	0.1103	-3.18049	P:negative regulation of endopeptidase activity (GO:0010951)	F:cysteine-type endopeptidase inhibitor activity (GO:0004869)	C:intracellular (GO:0005622)
A0A224YCX8_9ACAR	A0A224YCX8	Pancreatic trypsin inhibitor OS	2.317e-07	0.106398	-3.23246	P:negative regulation of endopeptidase activity (GO:0010951)	F:serine-type endopeptidase inhibitor activity (GO:0004867)	C:intracellular (GO:0005622)
A0A023GBH4_9ACAR	A0A023GBH4	Putative secreted protein OS	3.1404e-07	0.104171	-3.26298	non annotated	non annotated	non annotated
A0A224YRN6_9ACAR	A0A224YRN6	2,3-bisphosphoglycerate-independent phosphoglycerate mutase OS	4.1261e-06	0.0767155	-3.70434	P:glucose catabolic process (GO:0006007)	F:phosphoglycerate mutase activity (GO:0004619), manganese ion binding (GO:0030145)	C:cytoplasm (GO:0005737)
L7LYB6_9ACAR	L7LYB6	Uncharacterized protein OS	1.6077e-09	0.0754962	-3.72745	non annotated	non annotated	non annotated
A0A131XAM3_9ACAR	A0A131XAM3	Putative secreted salivary gland peptide OS	4.19e-06	0.0592329	-4.07746	non annotated	non annotated	non annotated
A0A023G883_9ACAR	A0A023G883	Putative glutathione s-transferase ixodes scapularis glutathione s-transferase (Fragment) OS	4.2218e-08	0.0561824	-4.15374	P:metabolic process (GO:0008152), aromatic amino acid family metabolic process (:GO:0009072)	F:transferase activity (GO:0016740)	C:cytoplasm (GO:0005737)
A0A131Z4A2_RHIAP	A0A131Z4A2	Cystatin OS	2.9809e-07	0.0387349	-4.69022	P:negative regulation of endopeptidase activity (GO:0010951)	F:cysteine-type endopeptidase inhibitor activity (GO:0004869)	C:intracellular (GO:0005622)
